# Supplementary material
Source: MDPI journal article supplement (https://www.mdpi.com/2624-8549/1/1/9)

# checkCIF/PLATON report

Structure factors have been supplied for datablock(s) CAN\_1dCHCl3

THIS REPORT IS FOR GUIDANCE ONLY. IF USED AS PART OF A REVIEW PROCEDURE FOR PUBLICATION, IT SHOULD NOT REPLACE THE EXPERTISE OF AN EXPERIENCED CRYSTALLOGRAPHIC REFEREE.

No syntax errors found.      CIF dictionary      Interpreting this report

## Datablock: CAN\_1dCHCl3

---

Bond precision:    C-C = 0.0040 Å

Wavelength=0.71073

Cell:                    a=10.0048(16)            b=16.371(3)            c=15.036(3)  
                          alpha=90            beta=97.402(3)            gamma=90  
Temperature:            173 K

|                | Calculated                    | Reported                |
|----------------|-------------------------------|-------------------------|
| Volume         | 2442.2(8)                     | 2442.3(7)               |
| Space group    | P 21/c                        | P 21/c                  |
| Hall group     | -P 2ybc                       | -P 2ybc                 |
| Moiety formula | C24 H16 Co N2 O4, C H0.84 Cl3 | ?                       |
| Sum formula    | C25 H16.84 Cl3 Co N2 O4       | C25 H16.83 Cl3 Co N2 O4 |
| Mr             | 574.52                        | 574.52                  |
| Dx,g cm-3      | 1.563                         | 1.562                   |
| Z              | 4                             | 4                       |
| Mu (mm-1)      | 1.066                         | 1.066                   |
| F000           | 1163.4                        | 1163.0                  |
| F000'          | 1166.93                       |                         |
| h,k,lmax       | 13,21,20                      | 13,21,20                |
| Nref           | 6087                          | 6062                    |
| Tmin,Tmax      | 0.764,0.889                   | 0.707,0.888             |
| Tmin'          | 0.703                         |                         |

Correction method= # Reported T Limits: Tmin=0.707 Tmax=0.888

AbsCorr = MULTI-SCAN

Data completeness= 0.996

Theta(max)= 28.310

R(reflections)= 0.0479( 4504)

wR2(reflections)= 0.1293( 6062)

S = 1.019

Npar= 326

---

The following ALERTS were generated. Each ALERT has the format

**test-name\_ALERT\_alert-type\_alert-level.**

Click on the hyperlinks for more details of the test.

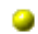

### Alert level C

|                   |                                               |              |
|-------------------|-----------------------------------------------|--------------|
| PLAT041_ALERT_1_C | Calc. and Reported SumFormula Strings Differ  | Please Check |
| PLAT244_ALERT_4_C | Low 'Solvent' Ueq as Compared to Neighbors of | C1C Check    |
| PLAT260_ALERT_2_C | Large Average Ueq of Residue Including C11C   | 0.131 Check  |
| PLAT977_ALERT_2_C | Check Negative Difference Density on H1C      | -0.34 eA-3   |

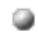

### Alert level G

FORMU01\_ALERT\_2\_G There is a discrepancy between the atom counts in the  
\_chemical\_formula\_sum and the formula from the \_atom\_site\* data.  
Atom count from \_chemical\_formula\_sum: C25 H16.83 Cl3 Col N2 O4  
Atom count from the \_atom\_site data: C25 H16.84 Cl3 Col N2 O4

|                   |                                                  |              |
|-------------------|--------------------------------------------------|--------------|
| PLAT004_ALERT_5_G | Polymeric Structure Found with Maximum Dimension | 3 Info       |
| PLAT066_ALERT_1_G | Predicted and Reported Tmin&Tmax Range Identical | ? Check      |
| PLAT068_ALERT_1_G | Reported F000 Differs from Calcd (or Missing)... | Please Check |
| PLAT232_ALERT_2_G | Hirshfeld Test Diff (M-X) Col --O2B_b .          | 6.1 s.u.     |
| PLAT302_ALERT_4_G | Anion/Solvent/Minor-Residue Disorder (Resd 2 )   | 25% Note     |
| PLAT764_ALERT_4_G | Overcomplete CIF Bond List Detected (Rep/Expd) . | 1.12 Ratio   |
| PLAT779_ALERT_4_G | Suspect or Irrelevant (Bond) Angle in CIF .... # | 110 Check    |
|                   | CL4C -C1C -CL3C 1.555 1.555 1.555                | 13.40 Deg.   |
| PLAT794_ALERT_5_G | Tentative Bond Valency for Col (II) .            | 1.82 Info    |
| PLAT883_ALERT_1_G | No Info/Value for _atom_sites_solution_primary . | Please Do !  |
| PLAT912_ALERT_4_G | Missing # of FCF Reflections Above STh/L= 0.600  | 25 Note      |
| PLAT978_ALERT_2_G | Number C-C Bonds with Positive Residual Density. | 13 Info      |

0 **ALERT level A** = Most likely a serious problem - resolve or explain  
0 **ALERT level B** = A potentially serious problem, consider carefully  
4 **ALERT level C** = Check. Ensure it is not caused by an omission or oversight  
12 **ALERT level G** = General information/check it is not something unexpected

4 ALERT type 1 CIF construction/syntax error, inconsistent or missing data  
5 ALERT type 2 Indicator that the structure model may be wrong or deficient  
0 ALERT type 3 Indicator that the structure quality may be low  
5 ALERT type 4 Improvement, methodology, query or suggestion  
2 ALERT type 5 Informative message, check

It is advisable to attempt to resolve as many as possible of the alerts in all categories. Often the minor alerts point to easily fixed oversights, errors and omissions in your CIF or refinement strategy, so attention to these fine details can be worthwhile. In order to resolve some of the more serious problems it may be necessary to carry out additional measurements or structure refinements. However, the purpose of your study may justify the reported deviations and the more serious of these should normally be commented upon in the discussion or experimental section of a paper or in the "special\_details" fields of the CIF. checkCIF was carefully designed to identify outliers and unusual parameters, but every test has its limitations and alerts that are not important in a particular case may appear. Conversely, the absence of alerts does not guarantee there are no aspects of the results needing attention. It is up to the individual to critically assess their own results and, if necessary, seek expert advice.

### **Publication of your CIF in IUCr journals**

A basic structural check has been run on your CIF. These basic checks will be run on all CIFs submitted for publication in IUCr journals (*Acta Crystallographica*, *Journal of Applied Crystallography*, *Journal of Synchrotron Radiation*); however, if you intend to submit to *Acta Crystallographica Section C* or *E* or *IUCrData*, you should make sure that full publication checks are run on the final version of your CIF prior to submission.

### **Publication of your CIF in other journals**

Please refer to the *Notes for Authors* of the relevant journal for any special instructions relating to CIF submission.

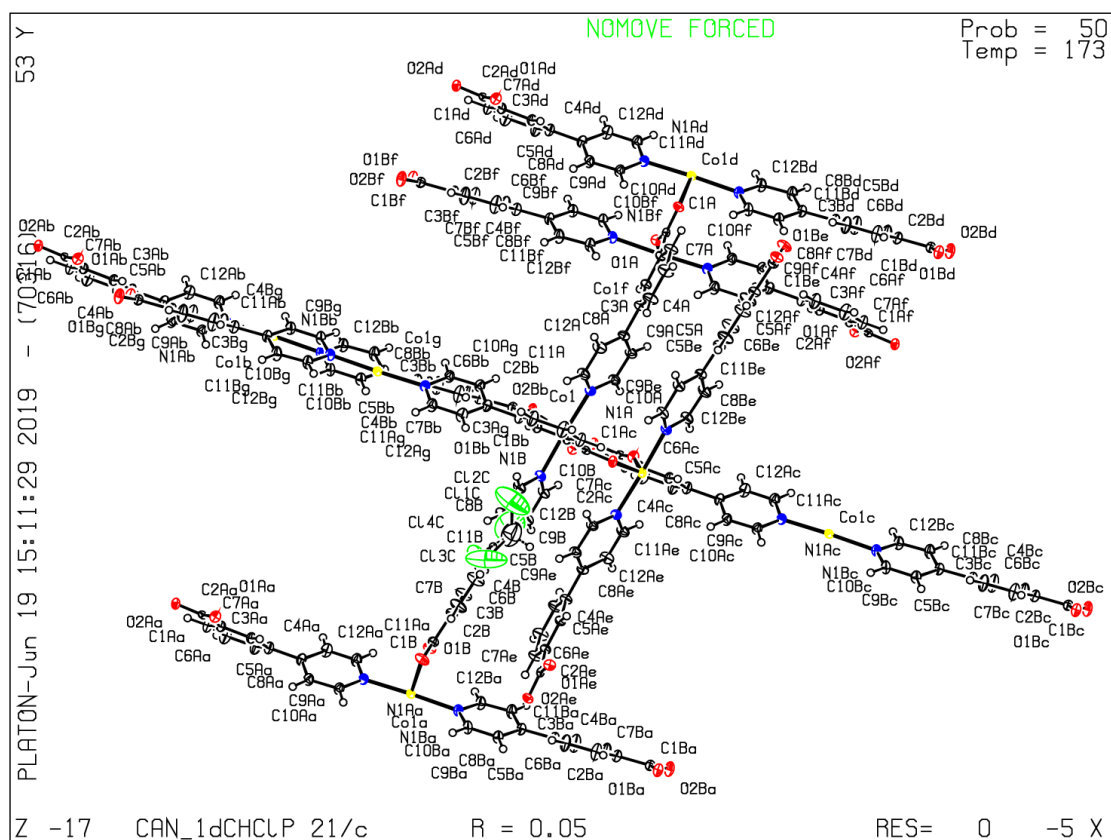

Supplement: s1 [file s1 › checkcif_1dCHCl3_final.pdf]
