# Supplementary material
Source: MDPI journal article supplement (https://www.mdpi.com/2624-8549/1/1/9)
Supplement: s1 [file s1]

Archive with 13 entries (13 files):
- 1_final CCDC 1935229.cif
- 1dCHCl3_final CCDC 1935233.cif
- 1dClBenz_final CCDC 1935234.cif
- 1dDCM_final CCDC 1935232.cif
- 2_final CCDC 1935230.cif
- 3_final CCDC 1935231.cif
- checkcif_1_final.pdf
- checkcif_1dCHCl3_final.pdf
- checkcif_1dClBenz_final.pdf
- checkcif_1dDCM_final.pdf
- checkcif_2_final.pdf
- checkcif_3_final.pdf
- ESI for Bourne_mixedPBA.docx
