# Supplementary material
Source: MDPI journal article supplement (https://www.mdpi.com/2624-8549/1/1/9)
Supplement: s1 [file s1 › 1_final CCDC 1935229.cif]

 
data_CAN_1
 
_audit_creation_method            'SHELXL-2017/1'
_chemical_name_systematic
;
 ?
;
_chemical_name_common             ?
_chemical_melting_point           ?
_chemical_formula_moiety          ?
_chemical_formula_sum
 'C27 H23 Co N3 O5' 
_chemical_formula_weight          528.41

loop_
 _atom_type_symbol
 _atom_type_description
 _atom_type_scat_dispersion_real
 _atom_type_scat_dispersion_imag
 _atom_type_scat_source
 'C'  'C'   0.0033   0.0016
 'International Tables Vol C Tables 4.2.6.8 and 6.1.1.4'
 'H'  'H'   0.0000   0.0000
 'International Tables Vol C Tables 4.2.6.8 and 6.1.1.4'
 'N'  'N'   0.0061   0.0033
 'International Tables Vol C Tables 4.2.6.8 and 6.1.1.4'
 'O'  'O'   0.0106   0.0060
 'International Tables Vol C Tables 4.2.6.8 and 6.1.1.4'
 'Co'  'Co'   0.3494   0.9721
 'International Tables Vol C Tables 4.2.6.8 and 6.1.1.4'
 
_space_group_crystal_system       monoclinic
_space_group_IT_number            14
_space_group_name_H-M_alt         'P 21/c'
_space_group_name_Hall            '-P 2ybc'
 
_shelx_space_group_comment
;
The symmetry employed for this shelxl refinement is uniquely defined
by the following loop, which should always be used as a source of
symmetry information in preference to the above space-group names.
They are only intended as comments.
;
 
loop_
 _space_group_symop_operation_xyz
 'x, y, z'
 '-x, y+1/2, -z+1/2'
 '-x, -y, -z'
 'x, -y-1/2, z-1/2'
 
_cell_length_a                    9.2030(18)
_cell_length_b                    17.823(4)
_cell_length_c                    14.718(3)
_cell_angle_alpha                 90
_cell_angle_beta                  92.75(3)
_cell_angle_gamma                 90
_cell_volume                      2411.3(8)
_cell_formula_units_Z             4
_cell_measurement_temperature     100(2)
_cell_measurement_reflns_used     22928 
_cell_measurement_theta_min       1.796
_cell_measurement_theta_max       28.341
 
_exptl_crystal_description        block 
_exptl_crystal_colour             red
_exptl_crystal_density_meas       none
_exptl_crystal_density_method     'not measured'           
_exptl_crystal_density_diffrn     1.456          
_exptl_crystal_F_000              1092
_exptl_transmission_factor_min    0.922                                             
_exptl_transmission_factor_max    0.942                                         
_exptl_crystal_size_max           0.110
_exptl_crystal_size_mid           0.100
_exptl_crystal_size_min           0.080
_exptl_absorpt_coefficient_mu     0.756
_shelx_estimated_absorpt_T_min    ? 
_shelx_estimated_absorpt_T_max    ? 
_exptl_absorpt_correction_type    multi-scan 
_exptl_absorpt_correction_T_min   ? 
_exptl_absorpt_correction_T_max   ? 
_exptl_absorpt_process_details    '(SADABS; Sheldrick, 1996)' 
 
_exptl_special_details
;
 ?
;
 
_diffrn_ambient_temperature       100(2)
_diffrn_radiation_wavelength      0.71073
_diffrn_radiation_type            MoK\a
_diffrn_source                    'fine-focus sealed tube'                       
_diffrn_measurement_device_type   'Bruker Kappa Duo Apex II diffractometer' 
_diffrn_measurement_method        ? 
_diffrn_detector_area_resol_mean  ? 
_diffrn_reflns_number             22928
_diffrn_reflns_av_unetI/netI      0.0741
_diffrn_reflns_av_R_equivalents   0.0643
_diffrn_reflns_limit_h_min        -12
_diffrn_reflns_limit_h_max        4
_diffrn_reflns_limit_k_min        -23
_diffrn_reflns_limit_k_max        23
_diffrn_reflns_limit_l_min        -19
_diffrn_reflns_limit_l_max        19
_diffrn_reflns_theta_min          1.796
_diffrn_reflns_theta_max          28.341
_diffrn_reflns_theta_full         25.242
_diffrn_measured_fraction_theta_max   0.993
_diffrn_measured_fraction_theta_full  0.999
_diffrn_reflns_Laue_measured_fraction_max    0.993
_diffrn_reflns_Laue_measured_fraction_full   0.999
_diffrn_reflns_point_group_measured_fraction_max   0.993
_diffrn_reflns_point_group_measured_fraction_full  0.999
_reflns_number_total              5981
_reflns_number_gt                 4089
_reflns_threshold_expression      'I > 2\s(I)'
_reflns_Friedel_coverage          0.000
_reflns_Friedel_fraction_max      .
_reflns_Friedel_fraction_full     .
 
_reflns_special_details
;
 Reflections were merged by SHELXL according to the crystal
 class for the calculation of statistics and refinement.
 
 _reflns_Friedel_fraction is defined as the number of unique
 Friedel pairs measured divided by the number that would be
 possible theoretically, ignoring centric projections and
 systematic absences.
;
 
_computing_data_collection        'APEX2 (Bruker, 2005)'
_computing_cell_refinement        'SAINT-Plus (Bruker, 2004)'
_computing_data_reduction         'SAINT-Plus and XPREP (Bruker 2004)'
_computing_structure_solution     'SHELXT 2014/5 (Sheldrick, 2014)'
_computing_structure_refinement   'SHELXL-2017/1 (Sheldrick, 2017)'
_computing_molecular_graphics     'X-seed (Barbour, 1999)'
_computing_publication_material   'SHELXL-97 (Sheldrick, 1997)'
 
_refine_special_details
;
 ?
;
_refine_ls_structure_factor_coef  Fsqd
_refine_ls_matrix_type            full
_refine_ls_weighting_scheme       calc
_refine_ls_weighting_details
'w=1/[\s^2^(Fo^2^)+(0.0565P)^2^+0.1986P] where P=(Fo^2^+2Fc^2^)/3'
_atom_sites_solution_primary      ?
_atom_sites_solution_secondary    ?
_atom_sites_solution_hydrogens    geom
_refine_ls_hydrogen_treatment     constr
_refine_ls_extinction_method      none
_refine_ls_extinction_coef        .
_refine_ls_number_reflns          5981
_refine_ls_number_parameters      327
_refine_ls_number_restraints      0
_refine_ls_R_factor_all           0.0859
_refine_ls_R_factor_gt            0.0482
_refine_ls_wR_factor_ref          0.1198
_refine_ls_wR_factor_gt           0.1066
_refine_ls_goodness_of_fit_ref    1.034
_refine_ls_restrained_S_all       1.034
_refine_ls_shift/su_max           0.001
_refine_ls_shift/su_mean          0.000
 
loop_
 _atom_site_label
 _atom_site_type_symbol
 _atom_site_fract_x
 _atom_site_fract_y
 _atom_site_fract_z
 _atom_site_U_iso_or_equiv
 _atom_site_adp_type
 _atom_site_occupancy
 _atom_site_site_symmetry_order  
 _atom_site_calc_flag
 _atom_site_refinement_flags_posn
 _atom_site_refinement_flags_adp
 _atom_site_refinement_flags_occupancy
 _atom_site_disorder_assembly
 _atom_site_disorder_group
Co1 Co 0.62883(3) 0.59020(2) 0.97784(2) 0.01313(11) Uani 1 1 d . . . . .
O1A O 0.43638(18) 0.94308(11) 1.41992(13) 0.0199(4) Uani 1 1 d . . . . .
N1A N 0.5052(2) 0.67329(12) 1.04601(15) 0.0195(5) Uani 1 1 d . . . . .
C1A C 0.3451(2) 0.98143(14) 1.37639(18) 0.0149(5) Uani 1 1 d . . . . .
O2A O 0.30522(19) 1.04656(10) 1.39824(12) 0.0188(4) Uani 1 1 d . . . . .
C2A C 0.2720(3) 0.94617(15) 1.29306(19) 0.0189(6) Uani 1 1 d . . . . .
C3A C 0.3365(3) 0.88398(15) 1.25346(19) 0.0181(6) Uani 1 1 d . . . . .
H3A H 0.4241 0.8655 1.2784 0.022 Uiso 1 1 calc R U . . .
C4A C 0.2711(3) 0.84924(16) 1.1770(2) 0.0232(6) Uani 1 1 d . . . . .
C5A C 0.1381(3) 0.8762(2) 1.1421(2) 0.0380(8) Uani 1 1 d . . . . .
H5A H 0.0917 0.8523 1.0925 0.046 Uiso 1 1 calc R U . . .
C6A C 0.0736(3) 0.9387(2) 1.1807(3) 0.0499(11) Uani 1 1 d . . . . .
H6A H -0.0150 0.9566 1.1566 0.060 Uiso 1 1 calc R U . . .
C7A C 0.1422(3) 0.97394(19) 1.2553(2) 0.0358(8) Uani 1 1 d . . . . .
H7A H 0.1006 1.0164 1.2800 0.043 Uiso 1 1 calc R U . . .
C8A C 0.3473(3) 0.78607(16) 1.13247(19) 0.0214(6) Uani 1 1 d . . . . .
C9A C 0.4383(3) 0.73778(16) 1.1815(2) 0.0263(6) Uani 1 1 d . . . . .
H9A H 0.4486 0.7418 1.2444 0.032 Uiso 1 1 calc R U . . .
C10A C 0.5142(3) 0.68332(16) 1.1361(2) 0.0242(6) Uani 1 1 d . . . . .
H10A H 0.5754 0.6517 1.1706 0.029 Uiso 1 1 calc R U . . .
C11A C 0.4124(3) 0.71852(16) 0.9992(2) 0.0248(6) Uani 1 1 d . . . . .
H11A H 0.3997 0.7113 0.9367 0.030 Uiso 1 1 calc R U . . .
C12A C 0.3344(3) 0.77543(18) 1.0387(2) 0.0279(7) Uani 1 1 d . . . . .
H12A H 0.2738 0.8063 1.0029 0.033 Uiso 1 1 calc R U . . .
O1B O 1.34066(17) 0.16184(10) 0.64024(12) 0.0178(4) Uani 1 1 d . . . . .
N1B N 0.7382(2) 0.50378(12) 0.90674(15) 0.0149(5) Uani 1 1 d . . . . .
C1B C 1.2201(3) 0.18318(15) 0.60481(18) 0.0168(5) Uani 1 1 d . . . . .
O2B O 1.17975(18) 0.16354(10) 0.52501(12) 0.0208(4) Uani 1 1 d . . . . .
C2B C 1.1244(3) 0.23229(15) 0.65899(18) 0.0184(6) Uani 1 1 d . . . . .
C3B C 1.1640(3) 0.24981(17) 0.7483(2) 0.0262(7) Uani 1 1 d . . . . .
H3B H 1.2467 0.2279 0.7758 0.031 Uiso 1 1 calc R U . . .
C4B C 1.0834(3) 0.29903(16) 0.7973(2) 0.0262(7) Uani 1 1 d . . . . .
H4B H 1.1135 0.3103 0.8569 0.031 Uiso 1 1 calc R U . . .
C5B C 0.9578(3) 0.33233(15) 0.75945(18) 0.0176(6) Uani 1 1 d . . . . .
C6B C 0.9156(3) 0.3121(2) 0.6716(2) 0.0444(10) Uani 1 1 d . . . . .
H6B H 0.8302 0.3319 0.6452 0.053 Uiso 1 1 calc R U . . .
C7B C 0.9979(3) 0.2626(2) 0.6215(2) 0.0440(10) Uani 1 1 d . . . . .
H7B H 0.9669 0.2500 0.5624 0.053 Uiso 1 1 calc R U . . .
C8B C 0.8774(3) 0.38943(14) 0.81041(18) 0.0159(5) Uani 1 1 d . . . . .
C9B C 0.9067(3) 0.40146(15) 0.90338(19) 0.0199(6) Uani 1 1 d . . . . .
H9B H 0.9731 0.3710 0.9355 0.024 Uiso 1 1 calc R U . . .
C10B C 0.8375(3) 0.45827(15) 0.94731(18) 0.0182(6) Uani 1 1 d . . . . .
H10B H 0.8610 0.4656 1.0088 0.022 Uiso 1 1 calc R U . . .
C11B C 0.7090(3) 0.49186(15) 0.81743(18) 0.0190(6) Uani 1 1 d . . . . .
H11B H 0.6404 0.5226 0.7875 0.023 Uiso 1 1 calc R U . . .
C12B C 0.7745(3) 0.43673(15) 0.76741(19) 0.0187(6) Uani 1 1 d . . . . .
H12B H 0.7502 0.4312 0.7057 0.022 Uiso 1 1 calc R U . . .
N1C N 0.6651(3) 0.57437(18) 0.4681(2) 0.0439(8) Uani 1 1 d . . . . .
C1C C 0.6711(4) 0.4997(2) 0.4806(3) 0.0472(9) Uani 1 1 d . . . . .
H1C H 0.6378 0.4698 0.4321 0.057 Uiso 1 1 calc R U . . .
C2C C 0.6097(5) 0.6058(2) 0.3822(3) 0.0546(11) Uani 1 1 d . . . . .
H2C H 0.5861 0.5659 0.3402 0.082 Uiso 1 1 calc R U . . .
H3C H 0.6825 0.6375 0.3576 0.082 Uiso 1 1 calc R U . . .
H4C H 0.5240 0.6348 0.3920 0.082 Uiso 1 1 calc R U . . .
O1C O 0.7165(3) 0.46683(16) 0.55023(18) 0.0608(8) Uani 1 1 d . . . . .
C3C C 0.7106(5) 0.6254(2) 0.5409(3) 0.0669(13) Uani 1 1 d . . . . .
H7C H 0.7190 0.5984 0.5973 0.100 Uiso 1 1 calc R U . . .
H6C H 0.6399 0.6646 0.5453 0.100 Uiso 1 1 calc R U . . .
H5C H 0.8032 0.6468 0.5282 0.100 Uiso 1 1 calc R U . . .
 
loop_
 _atom_site_aniso_label
 _atom_site_aniso_U_11
 _atom_site_aniso_U_22
 _atom_site_aniso_U_33
 _atom_site_aniso_U_23
 _atom_site_aniso_U_13
 _atom_site_aniso_U_12
Co1 0.01637(16) 0.01105(18) 0.01193(18) 0.00038(15) 0.00047(12) -0.00096(14)
O1A 0.0170(8) 0.0245(11) 0.0181(10) -0.0021(9) -0.0004(7) 0.0025(8)
N1A 0.0244(11) 0.0156(12) 0.0186(13) -0.0036(10) 0.0012(9) -0.0010(9)
C1A 0.0162(11) 0.0132(13) 0.0157(13) -0.0001(11) 0.0062(10) -0.0004(10)
O2A 0.0284(9) 0.0123(10) 0.0158(10) -0.0012(8) 0.0028(8) 0.0027(7)
C2A 0.0189(12) 0.0196(15) 0.0181(14) -0.0034(12) -0.0005(11) -0.0007(10)
C3A 0.0172(12) 0.0152(13) 0.0218(15) -0.0005(11) -0.0004(11) -0.0002(10)
C4A 0.0201(13) 0.0233(16) 0.0262(16) -0.0051(13) -0.0002(11) -0.0012(11)
C5A 0.0261(15) 0.043(2) 0.044(2) -0.0242(17) -0.0127(14) 0.0050(14)
C6A 0.0307(17) 0.062(3) 0.055(2) -0.038(2) -0.0186(16) 0.0224(16)
C7A 0.0277(15) 0.041(2) 0.0370(19) -0.0206(17) -0.0095(14) 0.0136(14)
C8A 0.0195(12) 0.0225(15) 0.0221(15) -0.0052(12) -0.0009(11) -0.0022(11)
C9A 0.0380(16) 0.0221(16) 0.0188(15) -0.0012(13) 0.0015(12) 0.0030(13)
C10A 0.0348(15) 0.0172(15) 0.0204(15) 0.0006(12) 0.0004(12) 0.0053(12)
C11A 0.0287(14) 0.0258(16) 0.0195(15) -0.0050(13) -0.0042(12) 0.0043(12)
C12A 0.0304(15) 0.0288(17) 0.0236(17) -0.0069(14) -0.0073(12) 0.0065(13)
O1B 0.0166(8) 0.0170(10) 0.0193(10) -0.0036(8) -0.0025(7) 0.0035(7)
N1B 0.0150(9) 0.0160(12) 0.0139(11) 0.0007(9) 0.0011(8) -0.0002(8)
C1B 0.0185(12) 0.0128(13) 0.0187(14) -0.0012(11) -0.0021(11) -0.0004(10)
O2B 0.0237(9) 0.0221(11) 0.0162(10) -0.0065(8) -0.0041(8) 0.0066(8)
C2B 0.0187(12) 0.0162(14) 0.0199(15) -0.0035(12) -0.0022(10) 0.0025(10)
C3B 0.0272(14) 0.0313(17) 0.0194(15) -0.0033(13) -0.0072(11) 0.0138(12)
C4B 0.0328(15) 0.0302(17) 0.0150(15) -0.0053(13) -0.0060(12) 0.0144(13)
C5B 0.0172(12) 0.0176(14) 0.0180(14) -0.0030(11) -0.0007(10) 0.0007(10)
C6B 0.0331(16) 0.065(3) 0.0322(19) -0.0292(18) -0.0218(14) 0.0336(16)
C7B 0.0393(18) 0.065(3) 0.0258(18) -0.0274(18) -0.0194(14) 0.0298(17)
C8B 0.0137(11) 0.0137(13) 0.0201(14) -0.0032(11) 0.0004(10) -0.0007(9)
C9B 0.0164(11) 0.0218(15) 0.0210(15) 0.0000(12) -0.0030(10) 0.0047(10)
C10B 0.0185(12) 0.0228(15) 0.0133(14) -0.0026(11) -0.0008(10) -0.0013(10)
C11B 0.0208(12) 0.0195(15) 0.0164(14) 0.0007(12) -0.0015(10) 0.0042(11)
C12B 0.0203(12) 0.0210(14) 0.0144(14) -0.0016(12) -0.0024(10) 0.0015(11)
N1C 0.0490(16) 0.043(2) 0.0386(18) 0.0015(14) -0.0120(14) 0.0002(14)
C1C 0.060(2) 0.045(2) 0.035(2) 0.0027(18) -0.0049(18) 0.0033(18)
C2C 0.071(3) 0.050(3) 0.042(2) 0.0180(19) -0.011(2) -0.004(2)
O1C 0.0825(19) 0.0599(19) 0.0388(16) 0.0138(14) -0.0100(14) 0.0093(15)
C3C 0.075(3) 0.053(3) 0.070(3) -0.013(2) -0.034(2) 0.012(2)
 
_geom_special_details
;
 All esds (except the esd in the dihedral angle between two l.s. planes)
 are estimated using the full covariance matrix.  The cell esds are taken
 into account individually in the estimation of esds in distances, angles
 and torsion angles; correlations between esds in cell parameters are only
 used when they are defined by crystal symmetry.  An approximate (isotropic)
 treatment of cell esds is used for estimating esds involving l.s. planes.
;
 
loop_
 _geom_bond_atom_site_label_1
 _geom_bond_atom_site_label_2
 _geom_bond_distance
 _geom_bond_site_symmetry_2
 _geom_bond_publ_flag
Co1 O1A 2.0175(18) 4_575 ?
Co1 O2A 2.0478(19) 2_647 ?
Co1 N1B 2.141(2) . ?
Co1 N1A 2.145(2) . ?
Co1 O1B 2.1854(18) 2_756 ?
Co1 O2B 2.1957(18) 2_756 ?
Co1 C1B 2.515(3) 2_756 ?
O1A C1A 1.238(3) . ?
O1A Co1 2.0175(18) 4_576 ?
N1A C10A 1.337(3) . ?
N1A C11A 1.341(4) . ?
C1A O2A 1.264(3) . ?
C1A C2A 1.507(4) . ?
O2A Co1 2.0479(19) 2_657 ?
C2A C7A 1.385(4) . ?
C2A C3A 1.398(4) . ?
C3A C4A 1.395(4) . ?
C3A H3A 0.9300 . ?
C4A C5A 1.390(4) . ?
C4A C8A 1.494(4) . ?
C5A C6A 1.396(5) . ?
C5A H5A 0.9300 . ?
C6A C7A 1.390(4) . ?
C6A H6A 0.9300 . ?
C7A H7A 0.9300 . ?
C8A C9A 1.380(4) . ?
C8A C12A 1.392(4) . ?
C9A C10A 1.386(4) . ?
C9A H9A 0.9300 . ?
C10A H10A 0.9300 . ?
C11A C12A 1.387(4) . ?
C11A H11A 0.9300 . ?
C12A H12A 0.9300 . ?
O1B C1B 1.262(3) . ?
O1B Co1 2.1853(18) 2_746 ?
N1B C10B 1.341(3) . ?
N1B C11B 1.346(3) . ?
C1B O2B 1.264(3) . ?
C1B C2B 1.498(4) . ?
C1B Co1 2.514(3) 2_746 ?
O2B Co1 2.1956(17) 2_746 ?
C2B C7B 1.375(4) . ?
C2B C3B 1.383(4) . ?
C3B C4B 1.375(4) . ?
C3B H3B 0.9300 . ?
C4B C5B 1.392(4) . ?
C4B H4B 0.9300 . ?
C5B C6B 1.380(4) . ?
C5B C8B 1.483(4) . ?
C6B C7B 1.397(4) . ?
C6B H6B 0.9300 . ?
C7B H7B 0.9300 . ?
C8B C12B 1.397(4) . ?
C8B C9B 1.398(4) . ?
C9B C10B 1.374(4) . ?
C9B H9B 0.9300 . ?
C10B H10B 0.9300 . ?
C11B C12B 1.383(4) . ?
C11B H11B 0.9300 . ?
C12B H12B 0.9300 . ?
N1C C1C 1.345(5) . ?
N1C C3C 1.451(5) . ?
N1C C2C 1.453(4) . ?
C1C O1C 1.235(4) . ?
C1C H1C 0.9300 . ?
C2C H2C 0.9600 . ?
C2C H3C 0.9600 . ?
C2C H4C 0.9600 . ?
C3C H7C 0.9600 . ?
C3C H6C 0.9600 . ?
C3C H5C 0.9600 . ?
 
loop_
 _geom_angle_atom_site_label_1
 _geom_angle_atom_site_label_2
 _geom_angle_atom_site_label_3
 _geom_angle
 _geom_angle_site_symmetry_1
 _geom_angle_site_symmetry_3
 _geom_angle_publ_flag
O1A Co1 O2A 118.77(8) 4_575 2_647 ?
O1A Co1 N1B 90.34(8) 4_575 . ?
O2A Co1 N1B 92.05(8) 2_647 . ?
O1A Co1 N1A 85.76(8) 4_575 . ?
O2A Co1 N1A 89.24(8) 2_647 . ?
N1B Co1 N1A 176.04(8) . . ?
O1A Co1 O1B 88.83(7) 4_575 2_756 ?
O2A Co1 O1B 152.40(7) 2_647 2_756 ?
N1B Co1 O1B 87.15(8) . 2_756 ?
N1A Co1 O1B 93.43(8) . 2_756 ?
O1A Co1 O2B 148.85(7) 4_575 2_756 ?
O2A Co1 O2B 92.25(7) 2_647 2_756 ?
N1B Co1 O2B 91.29(8) . 2_756 ?
N1A Co1 O2B 92.40(8) . 2_756 ?
O1B Co1 O2B 60.21(7) 2_756 2_756 ?
O1A Co1 C1B 118.95(8) 4_575 2_756 ?
O2A Co1 C1B 122.28(8) 2_647 2_756 ?
N1B Co1 C1B 87.35(8) . 2_756 ?
N1A Co1 C1B 95.12(9) . 2_756 ?
O1B Co1 C1B 30.13(7) 2_756 2_756 ?
O2B Co1 C1B 30.17(7) 2_756 2_756 ?
C1A O1A Co1 160.28(18) . 4_576 ?
C10A N1A C11A 115.9(2) . . ?
C10A N1A Co1 123.18(19) . . ?
C11A N1A Co1 120.88(19) . . ?
O1A C1A O2A 125.0(2) . . ?
O1A C1A C2A 117.1(2) . . ?
O2A C1A C2A 117.8(2) . . ?
C1A O2A Co1 119.88(17) . 2_657 ?
C7A C2A C3A 119.4(3) . . ?
C7A C2A C1A 121.4(2) . . ?
C3A C2A C1A 119.2(2) . . ?
C4A C3A C2A 120.9(2) . . ?
C4A C3A H3A 119.6 . . ?
C2A C3A H3A 119.6 . . ?
C5A C4A C3A 118.9(3) . . ?
C5A C4A C8A 121.4(3) . . ?
C3A C4A C8A 119.7(2) . . ?
C4A C5A C6A 120.6(3) . . ?
C4A C5A H5A 119.7 . . ?
C6A C5A H5A 119.7 . . ?
C7A C6A C5A 119.8(3) . . ?
C7A C6A H6A 120.1 . . ?
C5A C6A H6A 120.1 . . ?
C2A C7A C6A 120.4(3) . . ?
C2A C7A H7A 119.8 . . ?
C6A C7A H7A 119.8 . . ?
C9A C8A C12A 117.0(3) . . ?
C9A C8A C4A 121.8(3) . . ?
C12A C8A C4A 121.2(3) . . ?
C8A C9A C10A 119.5(3) . . ?
C8A C9A H9A 120.2 . . ?
C10A C9A H9A 120.2 . . ?
N1A C10A C9A 124.2(3) . . ?
N1A C10A H10A 117.9 . . ?
C9A C10A H10A 117.9 . . ?
N1A C11A C12A 123.6(3) . . ?
N1A C11A H11A 118.2 . . ?
C12A C11A H11A 118.2 . . ?
C11A C12A C8A 119.6(3) . . ?
C11A C12A H12A 120.2 . . ?
C8A C12A H12A 120.2 . . ?
C1B O1B Co1 89.52(15) . 2_746 ?
C10B N1B C11B 116.1(2) . . ?
C10B N1B Co1 122.97(18) . . ?
C11B N1B Co1 120.95(17) . . ?
O1B C1B O2B 120.9(2) . . ?
O1B C1B C2B 118.9(2) . . ?
O2B C1B C2B 120.2(2) . . ?
O1B C1B Co1 60.35(13) . 2_746 ?
O2B C1B Co1 60.82(13) . 2_746 ?
C2B C1B Co1 174.46(19) . 2_746 ?
C1B O2B Co1 89.01(14) . 2_746 ?
C7B C2B C3B 118.2(2) . . ?
C7B C2B C1B 121.6(3) . . ?
C3B C2B C1B 120.2(2) . . ?
C4B C3B C2B 121.2(3) . . ?
C4B C3B H3B 119.4 . . ?
C2B C3B H3B 119.4 . . ?
C3B C4B C5B 121.4(3) . . ?
C3B C4B H4B 119.3 . . ?
C5B C4B H4B 119.3 . . ?
C6B C5B C4B 117.0(2) . . ?
C6B C5B C8B 121.9(2) . . ?
C4B C5B C8B 121.0(2) . . ?
C5B C6B C7B 121.7(3) . . ?
C5B C6B H6B 119.2 . . ?
C7B C6B H6B 119.2 . . ?
C2B C7B C6B 120.4(3) . . ?
C2B C7B H7B 119.8 . . ?
C6B C7B H7B 119.8 . . ?
C12B C8B C9B 116.5(2) . . ?
C12B C8B C5B 121.9(2) . . ?
C9B C8B C5B 121.5(2) . . ?
C10B C9B C8B 120.1(2) . . ?
C10B C9B H9B 119.9 . . ?
C8B C9B H9B 119.9 . . ?
N1B C10B C9B 123.9(3) . . ?
N1B C10B H10B 118.1 . . ?
C9B C10B H10B 118.1 . . ?
N1B C11B C12B 124.1(2) . . ?
N1B C11B H11B 118.0 . . ?
C12B C11B H11B 118.0 . . ?
C11B C12B C8B 119.4(3) . . ?
C11B C12B H12B 120.3 . . ?
C8B C12B H12B 120.3 . . ?
C1C N1C C3C 120.7(3) . . ?
C1C N1C C2C 120.8(3) . . ?
C3C N1C C2C 118.5(3) . . ?
O1C C1C N1C 126.4(4) . . ?
O1C C1C H1C 116.8 . . ?
N1C C1C H1C 116.8 . . ?
N1C C2C H2C 109.5 . . ?
N1C C2C H3C 109.5 . . ?
H2C C2C H3C 109.5 . . ?
N1C C2C H4C 109.5 . . ?
H2C C2C H4C 109.5 . . ?
H3C C2C H4C 109.5 . . ?
N1C C3C H7C 109.5 . . ?
N1C C3C H6C 109.5 . . ?
H7C C3C H6C 109.5 . . ?
N1C C3C H5C 109.5 . . ?
H7C C3C H5C 109.5 . . ?
H6C C3C H5C 109.5 . . ?
 
loop_
 _geom_torsion_atom_site_label_1
 _geom_torsion_atom_site_label_2
 _geom_torsion_atom_site_label_3
 _geom_torsion_atom_site_label_4
 _geom_torsion
 _geom_torsion_site_symmetry_1
 _geom_torsion_site_symmetry_2
 _geom_torsion_site_symmetry_3
 _geom_torsion_site_symmetry_4
 _geom_torsion_publ_flag
Co1 O1A C1A O2A -64.8(6) 4_576 . . . ?
Co1 O1A C1A C2A 117.8(5) 4_576 . . . ?
O1A C1A O2A Co1 -8.7(3) . . . 2_657 ?
C2A C1A O2A Co1 168.73(16) . . . 2_657 ?
O1A C1A C2A C7A 161.1(3) . . . . ?
O2A C1A C2A C7A -16.5(4) . . . . ?
O1A C1A C2A C3A -18.6(4) . . . . ?
O2A C1A C2A C3A 163.8(2) . . . . ?
C7A C2A C3A C4A -0.6(4) . . . . ?
C1A C2A C3A C4A 179.2(2) . . . . ?
C2A C3A C4A C5A -1.8(4) . . . . ?
C2A C3A C4A C8A 176.0(3) . . . . ?
C3A C4A C5A C6A 2.4(5) . . . . ?
C8A C4A C5A C6A -175.4(3) . . . . ?
C4A C5A C6A C7A -0.6(6) . . . . ?
C3A C2A C7A C6A 2.4(5) . . . . ?
C1A C2A C7A C6A -177.3(3) . . . . ?
C5A C6A C7A C2A -1.8(6) . . . . ?
C5A C4A C8A C9A -151.2(3) . . . . ?
C3A C4A C8A C9A 31.1(4) . . . . ?
C5A C4A C8A C12A 31.7(4) . . . . ?
C3A C4A C8A C12A -146.0(3) . . . . ?
C12A C8A C9A C10A 1.7(4) . . . . ?
C4A C8A C9A C10A -175.6(3) . . . . ?
C11A N1A C10A C9A -2.0(4) . . . . ?
Co1 N1A C10A C9A 178.3(2) . . . . ?
C8A C9A C10A N1A -0.5(5) . . . . ?
C10A N1A C11A C12A 3.3(4) . . . . ?
Co1 N1A C11A C12A -177.0(2) . . . . ?
N1A C11A C12A C8A -2.1(5) . . . . ?
C9A C8A C12A C11A -0.5(4) . . . . ?
C4A C8A C12A C11A 176.8(3) . . . . ?
Co1 O1B C1B O2B -6.1(3) 2_746 . . . ?
Co1 O1B C1B C2B 173.7(2) 2_746 . . . ?
O1B C1B O2B Co1 6.1(2) . . . 2_746 ?
C2B C1B O2B Co1 -173.7(2) . . . 2_746 ?
O1B C1B C2B C7B 174.3(3) . . . . ?
O2B C1B C2B C7B -5.8(4) . . . . ?
O1B C1B C2B C3B -4.1(4) . . . . ?
O2B C1B C2B C3B 175.8(3) . . . . ?
C7B C2B C3B C4B -3.2(5) . . . . ?
C1B C2B C3B C4B 175.3(3) . . . . ?
C2B C3B C4B C5B 1.0(5) . . . . ?
C3B C4B C5B C6B 1.8(5) . . . . ?
C3B C4B C5B C8B -175.6(3) . . . . ?
C4B C5B C6B C7B -2.3(5) . . . . ?
C8B C5B C6B C7B 175.0(3) . . . . ?
C3B C2B C7B C6B 2.6(5) . . . . ?
C1B C2B C7B C6B -175.8(3) . . . . ?
C5B C6B C7B C2B 0.1(6) . . . . ?
C6B C5B C8B C12B -13.5(4) . . . . ?
C4B C5B C8B C12B 163.8(3) . . . . ?
C6B C5B C8B C9B 170.1(3) . . . . ?
C4B C5B C8B C9B -12.7(4) . . . . ?
C12B C8B C9B C10B -1.1(4) . . . . ?
C5B C8B C9B C10B 175.5(2) . . . . ?
C11B N1B C10B C9B -0.9(4) . . . . ?
Co1 N1B C10B C9B 178.6(2) . . . . ?
C8B C9B C10B N1B 1.5(4) . . . . ?
C10B N1B C11B C12B 0.0(4) . . . . ?
Co1 N1B C11B C12B -179.4(2) . . . . ?
N1B C11B C12B C8B 0.3(4) . . . . ?
C9B C8B C12B C11B 0.3(4) . . . . ?
C5B C8B C12B C11B -176.3(2) . . . . ?
C3C N1C C1C O1C -1.8(6) . . . . ?
C2C N1C C1C O1C 179.6(4) . . . . ?
 
loop_
 _geom_hbond_atom_site_label_D 
 _geom_hbond_atom_site_label_H 
 _geom_hbond_atom_site_label_A 
 _geom_hbond_distance_DH 
 _geom_hbond_distance_HA 
 _geom_hbond_distance_DA 
 _geom_hbond_angle_DHA 
 _geom_hbond_site_symmetry_A 
C9B H9B O2B  0.93 2.34 3.230(3) 159.3 4_566
C12B H12B O1C  0.93 2.38 3.260(4) 157.6 .
C10A H10A O2A  0.93 2.42 3.006(3) 121.0 2_647
C10B H10B O2A  0.93 2.55 3.107(3) 119.0 2_647
 
_refine_diff_density_max    0.414
_refine_diff_density_min   -0.417
_refine_diff_density_rms    0.082

_shelxl_version_number 2014-3

_shelx_res_file
;
TITL C: co89_a.res in
CELL 0.71073 9.2030 17.8230 14.7180 90.000 92.753 90.000
ZERR 4.0000 0.0018 0.0036 0.0029 0.000 0.030 0.000
LATT 1
SYMM -X, 0.5+Y, 0.5-Z
SFAC C H N O CO
UNIT 108 92 12 20 4
BOND $H
CONF
EQIV $1 X,1/2-Y,1/2+Z
EQIV $2 1-X,1-Y,2-Z
EQIV $3 1-X,1/2+Y,3/2-Z
EQIV $4 1-X,Y-1/2,5/2-Z
HTAB C9B O2B_$1
HTAB C10B O2A_$2
HTAB C12B O1C
HTAB C10A O2A_$3
HTAB C10A O2A_$4
HTAB C10B O2A_$4
ACTA
FMAP 2 1 53
PLAN 20 0 0
HTAB 2.0
LIST 6 1
L.S. 10
WGHT    0.056500    0.198600
FVAR       0.27991
CO1   5    0.628826    0.590201    0.977836    11.00000    0.01637    0.01105 =
         0.01193    0.00038    0.00047   -0.00096
O1A   4    0.436375    0.943078    1.419925    11.00000    0.01700    0.02450 =
         0.01810   -0.00210   -0.00036    0.00249
N1A   3    0.505232    0.673285    1.046014    11.00000    0.02439    0.01560 =
         0.01860   -0.00358    0.00122   -0.00101
C1A   1    0.345102    0.981434    1.376394    11.00000    0.01618    0.01325 =
         0.01573   -0.00012    0.00616   -0.00037
O2A   4    0.305220    1.046564    1.398243    11.00000    0.02842    0.01226 =
         0.01581   -0.00120    0.00276    0.00267
C2A   1    0.271996    0.946174    1.293063    11.00000    0.01886    0.01960 =
         0.01806   -0.00341   -0.00046   -0.00070
C3A   1    0.336474    0.883979    1.253463    11.00000    0.01724    0.01515 =
         0.02184   -0.00049   -0.00038   -0.00015
AFIX  43
H3A   2    0.424095    0.865515    1.278408    11.00000   -1.20000
AFIX   0
C4A   1    0.271119    0.849242    1.177016    11.00000    0.02011    0.02325 =
         0.02620   -0.00507   -0.00020   -0.00119
C5A   1    0.138140    0.876166    1.142081    11.00000    0.02609    0.04263 =
         0.04381   -0.02425   -0.01274    0.00504
AFIX  43
H5A   2    0.091734    0.852336    1.092521    11.00000   -1.20000
AFIX   0
C6A   1    0.073597    0.938668    1.180722    11.00000    0.03072    0.06174 =
         0.05513   -0.03758   -0.01862    0.02235
AFIX  43
H6A   2   -0.014974    0.956635    1.156633    11.00000   -1.20000
AFIX   0
C7A   1    0.142150    0.973941    1.255302    11.00000    0.02775    0.04147 =
         0.03701   -0.02057   -0.00945    0.01364
AFIX  43
H7A   2    0.100599    1.016425    1.279986    11.00000   -1.20000
AFIX   0
C8A   1    0.347322    0.786071    1.132471    11.00000    0.01945    0.02251 =
         0.02209   -0.00517   -0.00092   -0.00219
C9A   1    0.438320    0.737777    1.181457    11.00000    0.03802    0.02213 =
         0.01879   -0.00116    0.00150    0.00296
AFIX  43
H9A   2    0.448627    0.741755    1.244441    11.00000   -1.20000
AFIX   0
C10A  1    0.514228    0.683317    1.136145    11.00000    0.03480    0.01718 =
         0.02038    0.00063    0.00040    0.00532
AFIX  43
H10A  2    0.575389    0.651694    1.170648    11.00000   -1.20000
AFIX   0
C11A  1    0.412431    0.718517    0.999153    11.00000    0.02874    0.02576 =
         0.01950   -0.00496   -0.00421    0.00432
AFIX  43
H11A  2    0.399691    0.711337    0.936692    11.00000   -1.20000
AFIX   0
C12A  1    0.334394    0.775431    1.038746    11.00000    0.03038    0.02880 =
         0.02355   -0.00692   -0.00734    0.00653
AFIX  43
H12A  2    0.273766    0.806309    1.002856    11.00000   -1.20000
AFIX   0
O1B   4    1.340664    0.161840    0.640236    11.00000    0.01665    0.01696 =
         0.01934   -0.00360   -0.00248    0.00347
N1B   3    0.738210    0.503778    0.906745    11.00000    0.01503    0.01597 =
         0.01387    0.00070    0.00106   -0.00021
C1B   1    1.220055    0.183185    0.604811    11.00000    0.01855    0.01282 =
         0.01874   -0.00117   -0.00208   -0.00036
O2B   4    1.179746    0.163539    0.525014    11.00000    0.02365    0.02211 =
         0.01623   -0.00649   -0.00410    0.00663
C2B   1    1.124400    0.232285    0.658994    11.00000    0.01871    0.01624 =
         0.01993   -0.00345   -0.00222    0.00246
C3B   1    1.164000    0.249814    0.748330    11.00000    0.02720    0.03131 =
         0.01941   -0.00335   -0.00725    0.01384
AFIX  43
H3B   2    1.246652    0.227897    0.775783    11.00000   -1.20000
AFIX   0
C4B   1    1.083444    0.299029    0.797282    11.00000    0.03280    0.03018 =
         0.01496   -0.00530   -0.00596    0.01444
AFIX  43
H4B   2    1.113534    0.310319    0.856945    11.00000   -1.20000
AFIX   0
C5B   1    0.957774    0.332335    0.759452    11.00000    0.01720    0.01755 =
         0.01798   -0.00296   -0.00069    0.00074
C6B   1    0.915607    0.312084    0.671636    11.00000    0.03315    0.06549 =
         0.03217   -0.02916   -0.02179    0.03361
AFIX  43
H6B   2    0.830217    0.331910    0.645155    11.00000   -1.20000
AFIX   0
C7B   1    0.997877    0.262571    0.621491    11.00000    0.03926    0.06487 =
         0.02580   -0.02742   -0.01939    0.02976
AFIX  43
H7B   2    0.966884    0.250010    0.562365    11.00000   -1.20000
AFIX   0
C8B   1    0.877412    0.389428    0.810413    11.00000    0.01371    0.01372 =
         0.02009   -0.00323    0.00042   -0.00072
C9B   1    0.906690    0.401460    0.903377    11.00000    0.01642    0.02177 =
         0.02104    0.00004   -0.00299    0.00471
AFIX  43
H9B   2    0.973083    0.370962    0.935525    11.00000   -1.20000
AFIX   0
C10B  1    0.837525    0.458270    0.947308    11.00000    0.01851    0.02280 =
         0.01325   -0.00256   -0.00083   -0.00135
AFIX  43
H10B  2    0.861000    0.465587    1.008834    11.00000   -1.20000
AFIX   0
C11B  1    0.708951    0.491860    0.817430    11.00000    0.02076    0.01954 =
         0.01638    0.00068   -0.00148    0.00420
AFIX  43
H11B  2    0.640444    0.522588    0.787492    11.00000   -1.20000
AFIX   0
C12B  1    0.774480    0.436728    0.767407    11.00000    0.02027    0.02102 =
         0.01436   -0.00158   -0.00239    0.00153
AFIX  43
H12B  2    0.750216    0.431208    0.705699    11.00000   -1.20000
AFIX   0
N1C   3    0.665091    0.574369    0.468100    11.00000    0.04896    0.04282 =
         0.03856    0.00153   -0.01197    0.00018
C1C   1    0.671076    0.499676    0.480624    11.00000    0.06007    0.04539 =
         0.03548    0.00269   -0.00495    0.00325
AFIX  43
H1C   2    0.637778    0.469836    0.432142    11.00000   -1.20000
AFIX   0
C2C   1    0.609747    0.605833    0.382165    11.00000    0.07054    0.04974 =
         0.04212    0.01799   -0.01081   -0.00376
AFIX 137
H2C   2    0.586147    0.565938    0.340186    11.00000   -1.50000
H3C   2    0.682527    0.637509    0.357576    11.00000   -1.50000
H4C   2    0.524006    0.634838    0.391962    11.00000   -1.50000
AFIX   0
O1C   4    0.716480    0.466825    0.550231    11.00000    0.08249    0.05990 =
         0.03879    0.01379   -0.01004    0.00934
C3C   1    0.710646    0.625353    0.540886    11.00000    0.07453    0.05271 =
         0.06968   -0.01311   -0.03438    0.01190
AFIX 137
H7C   2    0.718983    0.598359    0.597339    11.00000   -1.50000
H6C   2    0.639917    0.664616    0.545276    11.00000   -1.50000
H5C   2    0.803176    0.646813    0.528194    11.00000   -1.50000
AFIX   0
HKLF 4

REM  C: co89_a.res in
REM R1 =  0.0482 for    4089 Fo > 4sig(Fo)  and  0.0859 for all    5981 data
REM    327 parameters refined using      0 restraints

END

WGHT      0.0565      0.1986

REM Instructions for potential hydrogen bonds
HTAB C10A O2A_$4
HTAB C9B O2B_$1
HTAB C10B O2A_$4
HTAB C12B O1C

REM Highest difference peak  0.414,  deepest hole -0.417,  1-sigma level  0.082
Q1    1   0.4722  0.6336  0.3623  11.00000  0.05    0.41
Q2    1   0.7430  0.5923  0.9623  11.00000  0.05    0.40
Q3    1   0.8104  0.4003  0.7972  11.00000  0.05    0.40
Q4    1   1.1555  0.2574  0.6943  11.00000  0.05    0.39
Q5    1   0.0601  0.9069  1.2384  11.00000  0.05    0.37
Q6    1   1.0668  0.2380  0.6432  11.00000  0.05    0.36
Q7    1   0.4249  0.9871  1.4061  11.00000  0.05    0.36
Q8    1   0.9068  0.3573  0.7866  11.00000  0.05    0.36
Q9    1   0.8948  0.3993  0.8571  11.00000  0.05    0.35
Q10   1   0.9512  0.5791  0.5058  11.00000  0.05    0.34
Q11   1   0.9312  0.2770  0.6543  11.00000  0.05    0.34
Q12   1   0.4308  0.7780  1.1409  11.00000  0.05    0.33
Q13   1   0.8188  0.6000  0.4988  11.00000  0.05    0.32
Q14   1   0.5432  0.6804  1.0813  11.00000  0.05    0.32
Q15   1   1.1563  0.2013  0.6406  11.00000  0.05    0.32
Q16   1   0.1634  0.8998  1.3005  11.00000  0.05    0.32
Q17   1   0.8731  0.4433  0.9001  11.00000  0.05    0.32
Q18   1   0.8566  0.5927  0.4346  11.00000  0.05    0.31
Q19   1   1.2991  0.1840  0.6204  11.00000  0.05    0.30
Q20   1   0.4944  0.4606  0.4788  11.00000  0.05    0.30
;
_shelx_res_checksum   86895

_shelx_hkl_file
;
  -2   0   0 1037.56   31.71
  -3   0   0 1064.23   33.29
  -4   0   0 1030.17   33.03
  -5   0   0  134.81    8.06
  -6   0   0  115.51    8.22
  -7   0   0   66.39    7.30
  -8   0   0  114.65   10.28
  -9   0   0   10.09    5.71
 -10   0   0   33.11    7.62
 -11   0   0   48.25    9.14
 -12   0   0   -0.43    6.91
  -1  -1   0   71.59    2.83
  -1   1   0   76.39    2.74
  -1   1   0   74.79    2.75
  -2  -1   0   42.55    3.27
  -3  -1   0   73.22    5.14
  -3   1   0  101.26    5.93
  -4  -1   0   64.13    5.33
  -4   1   0   62.71    5.84
  -5  -1   0  349.31   13.80
  -5   1   0  341.96   14.44
  -6  -1   0  142.04    8.68
  -6   1   0  132.34    8.98
  -7  -1   0    1.37    3.67
  -7   1   0   -6.20    3.83
  -8  -1   0   10.23    4.61
  -8   1   0   10.86    5.69
  -9  -1   0   11.81    5.37
  -9   1   0   21.67    6.68
 -10  -1   0   70.45    9.64
 -10   1   0   57.30    9.42
 -11  -1   0   21.41    7.34
 -11   1   0   36.14    9.00
 -12   1   0   -7.99    6.26
   0  -2   0  286.90    9.04
   0   2   0  284.35    9.05
   1  -2   0  236.80    7.62
  -1  -2   0  251.90    7.88
  -1   2   0  212.20    7.83
  -1   2   0  235.25    7.75
   1   2   0  252.97    7.76
  -2  -2   0 1687.42   49.46
  -2  -2   0 1665.75   48.01
  -2  -2   0 1732.29   49.59
  -2   2   0 1667.30   49.32
  -2   2   0 1610.01   49.29
  -2   2   0 1668.46   47.90
  -3  -2   0  568.54   17.13
  -3  -2   0  586.01   18.59
  -3   2   0  574.45   16.94
  -3   2   0  561.78   19.57
  -4  -2   0   28.69    2.24
  -4  -2   0   23.40    2.20
  -4  -2   0   25.69    3.65
  -4   2   0   24.41    4.27
  -5  -2   0   50.91    5.25
  -5  -2   0   41.97    2.86
  -5   2   0   45.46    5.65
  -6  -2   0   19.78    4.12
  -6   2   0   32.52    5.68
  -7  -2   0   12.20    4.37
  -7   2   0   15.48    5.41
  -8  -2   0   12.02    4.90
  -8   2   0   17.54    5.92
  -9  -2   0   24.81    6.10
  -9   2   0   22.02    7.15
 -10  -2   0    6.18    5.41
 -10   2   0   17.14    7.77
 -11   2   0   18.49    8.21
 -12   2   0    7.30    7.98
   0  -3   0    2.10    1.73
   0   3   0    5.55    1.99
  -1  -3   0    6.73    2.00
   1  -3   0    9.42    1.91
  -1   3   0    7.38    2.08
  -1   3   0    7.20    2.03
   1   3   0    5.40    2.07
   2  -3   0 5512.74  158.32
  -2  -3   0 5697.32  158.79
  -2  -3   0 5640.07  162.91
  -2  -3   0 5629.71  163.85
   2   3   0 5667.60  158.49
  -2   3   0 5576.35  163.73
  -2   3   0 5479.17  158.61
  -2   3   0 5517.80  163.74
  -2   3   0 5542.83  164.40
  -3  -3   0  130.72    5.80
  -3  -3   0  131.29    5.62
  -3  -3   0  127.83    5.43
  -3   3   0  130.69    5.40
  -3   3   0  136.09    5.32
  -3   3   0  129.50    7.36
  -3   3   0  133.60    5.38
  -4  -3   0   77.67    5.07
  -4  -3   0   76.26    4.28
  -4  -3   0   83.06    3.99
  -4   3   0   78.64    4.00
  -4   3   0   75.65    3.81
  -4   3   0   83.88    7.00
  -4   3   0   74.41    3.87
  -5  -3   0  307.92   11.75
  -5  -3   0  298.69   10.18
  -5  -3   0  301.68   10.10
  -5   3   0  297.25   13.44
  -5   3   0  277.17    9.72
  -5   3   0  292.86    9.78
  -6  -3   0  571.38   19.90
  -6  -3   0  558.62   17.43
  -6   3   0  552.06   17.11
  -6   3   0  550.26   21.79
  -6   3   0  534.85   17.01
  -7  -3   0    9.79    2.30
  -7  -3   0    7.61    3.75
  -7   3   0    5.57    5.09
  -8  -3   0   11.81    4.42
  -8  -3   0    2.08    2.17
  -8   3   0   -0.57    5.37
  -9  -3   0   34.42    6.20
  -9   3   0   14.66    7.09
 -10   3   0   74.59   10.96
 -11   3   0   21.48    9.15
 -12   3   0    4.21    8.29
   0  -4   0    7.36    2.43
   0   4   0    7.94    1.92
   0   4   0    8.75    2.53
  -1  -4   0   54.69    4.02
   1  -4   0   52.46    4.20
  -1   4   0   55.44    4.40
  -1   4   0   60.20    4.17
   1   4   0   56.52    3.98
  -2  -4   0   64.45    4.17
  -2  -4   0   60.72    4.41
   2  -4   0   52.38    3.84
   2   4   0   59.77    4.11
  -2   4   0   51.44    3.85
  -2   4   0   54.26    4.26
  -2   4   0   55.66    4.76
  -2   4   0   50.88    4.05
  -3  -4   0    7.18    2.01
  -3  -4   0   11.61    2.05
  -3  -4   0    8.05    2.43
  -3   4   0    8.57    2.35
  -3   4   0   12.24    2.53
  -3   4   0    6.00    3.37
   3   4   0   11.54    2.04
  -3   4   0    7.24    2.17
  -4  -4   0  270.95    9.62
  -4  -4   0  264.31    9.70
  -4  -4   0  264.10    9.55
  -4   4   0  249.28    9.40
  -4   4   0  257.19    9.42
  -4   4   0  264.65    9.41
  -4   4   0  239.86   11.72
  -5  -4   0   47.88    4.34
  -5  -4   0   41.86    3.69
  -5  -4   0   44.47    3.52
  -5   4   0   34.61    3.28
  -5   4   0   42.08    6.05
  -5   4   0   38.12    3.26
  -5   4   0   35.37    3.20
  -6  -4   0   -2.19    2.04
  -6  -4   0    1.67    2.63
  -6  -4   0    0.50    1.87
  -6   4   0    1.86    1.95
  -6   4   0    2.06    1.97
  -6   4   0    6.58    4.61
  -7  -4   0  229.31    9.42
  -7  -4   0  247.88   11.35
  -7  -4   0  238.93    9.42
  -7  -4   0  247.04    9.64
  -7   4   0  234.19    9.17
  -7   4   0  226.97   13.61
  -7   4   0  232.39    8.94
  -8  -4   0   71.27    7.27
  -8  -4   0   80.26    5.88
  -8  -4   0   75.70    5.35
  -8  -4   0   74.01    5.39
  -8   4   0   70.42    9.05
  -8   4   0   67.82    4.77
  -9  -4   0   21.88    3.88
  -9  -4   0   19.39    5.21
  -9  -4   0   12.57    3.47
  -9   4   0    8.16    6.44
 -10  -4   0   -5.60    3.74
 -10  -4   0   -2.47    3.31
 -10   4   0   -1.82    6.60
 -11   4   0    0.45    7.56
 -12   4   0   46.37   10.99
   0  -5   0    2.77    2.47
   0   5   0    4.02    2.75
   0   5   0    1.83    1.95
  -1  -5   0  392.69   13.68
   1  -5   0  410.70   13.63
   1   5   0  381.01   13.56
  -1   5   0  390.21   13.63
  -1   5   0  398.07   13.70
  -2  -5   0   76.43    5.33
   2  -5   0   84.59    5.06
  -2  -5   0   90.86    5.41
   2   5   0   84.77    5.23
  -2   5   0   88.28    5.47
  -2   5   0   85.66    5.94
  -2   5   0   98.80    5.47
  -2   5   0   83.77    5.46
  -3  -5   0   11.36    1.78
  -3  -5   0   11.64    2.74
  -3  -5   0    8.88    2.41
   3  -5   0    8.55    2.10
  -3   5   0    7.14    2.54
  -3   5   0    8.57    2.56
  -3   5   0    5.79    3.33
   3   5   0   10.09    2.34
  -3   5   0    9.24    2.71
  -4  -5   0  241.64    9.52
  -4  -5   0  227.64    9.38
  -4  -5   0  240.06    8.78
  -4   5   0  239.95    9.41
  -4   5   0  251.42    9.47
  -4   5   0  238.14    9.43
  -4   5   0  242.35   11.65
  -5  -5   0   67.30    4.82
  -5  -5   0   68.81    4.67
  -5  -5   0   64.57    5.08
  -5   5   0   69.57    4.90
  -5   5   0   70.90    7.35
  -5   5   0   67.55    4.65
  -6  -5   0   10.66    3.02
  -6  -5   0    7.17    2.57
  -6  -5   0    6.95    2.62
  -6   5   0    9.55    2.60
  -6   5   0    9.45    2.68
  -6   5   0   10.66    4.91
  -7  -5   0   24.67    3.83
  -7  -5   0   33.95    4.04
  -7  -5   0   26.75    3.75
  -7  -5   0   35.12    4.82
  -7   5   0   32.09    3.75
  -7   5   0   27.73    6.58
  -7   5   0   32.23    3.78
  -8  -5   0   18.24    4.22
  -8  -5   0    9.96    3.66
  -8  -5   0    4.52    3.08
  -8  -5   0   12.61    3.28
  -8   5   0   14.12    3.21
  -8   5   0   15.21    3.01
  -8   5   0   13.40    6.44
  -9  -5   0   16.84    4.02
  -9  -5   0   17.17    4.25
  -9  -5   0   19.84    3.77
  -9   5   0   17.13    3.88
  -9   5   0   26.46    7.76
 -10  -5   0    8.83    4.45
 -10  -5   0    2.27    3.83
 -10   5   0    4.50    7.34
 -10   5   0    2.95    3.64
 -11  -5   0   26.72    5.56
 -11  -5   0   24.31    5.09
 -11   5   0   -0.64    7.31
 -12   5   0    5.36    9.03
   0  -6   0  118.05    6.86
   0   6   0  124.01    5.61
   0   6   0  117.74    6.85
  -1  -6   0  106.50    6.50
   1  -6   0  122.91    6.60
   1   6   0  110.49    6.38
   1   6   0  108.99    4.39
  -1   6   0  112.20    6.21
  -1   6   0  122.83    6.75
   2  -6   0  144.94    6.99
  -2  -6   0  144.62    7.19
  -2  -6   0  140.76    7.25
  -2   6   0  138.13    7.16
  -2   6   0  137.61    7.28
  -2   6   0  138.17    7.64
   2   6   0  152.74    7.20
  -3  -6   0  231.95    9.73
  -3  -6   0  237.71    9.69
   3  -6   0  236.62    9.03
   3   6   0  222.41    9.14
  -3   6   0  233.98   11.02
  -3   6   0  238.94    9.74
  -3   6   0  248.31    9.81
  -4  -6   0  923.54   31.19
  -4  -6   0  994.91   30.72
  -4  -6   0  991.67   29.74
   4   6   0  952.65   29.55
  -4   6   0 1007.20   31.31
  -4   6   0  991.17   33.24
  -4   6   0 1006.31   30.52
  -5  -6   0  291.32   11.78
  -5  -6   0  305.45   10.96
  -5  -6   0  307.74   11.95
  -5   6   0  315.75   11.71
  -5   6   0  299.72   14.35
  -5   6   0  298.04   11.68
  -6  -6   0   19.09    3.37
  -6  -6   0   15.81    3.34
  -6  -6   0   16.17    3.32
  -6  -6   0   11.72    3.36
  -6   6   0   25.27    5.64
  -6   6   0   23.86    3.65
  -6   6   0   19.39    3.48
  -7  -6   0   12.79    3.44
  -7  -6   0    8.61    3.64
  -7  -6   0   21.87    3.89
  -7  -6   0   11.23    3.39
  -7   6   0   10.67    5.94
  -7   6   0   13.27    3.35
  -7   6   0   15.07    3.54
  -8  -6   0   92.09    7.17
  -8  -6   0   90.52    6.55
  -8  -6   0   74.26    6.52
  -8   6   0   85.86    6.23
  -8   6   0   89.82   10.41
  -8   6   0   90.34    6.67
  -9  -6   0    6.49    3.38
  -9  -6   0    4.56    3.73
  -9  -6   0    0.08    3.83
  -9   6   0   -4.14    6.34
  -9   6   0    6.70    3.72
 -10  -6   0    2.71    4.69
 -10  -6   0    8.97    4.43
 -10   6   0    2.49    7.23
 -10   6   0    5.87    4.18
 -11  -6   0   36.32    6.39
 -11  -6   0   42.91    6.11
 -11   6   0   37.35   10.58
 -11   6   0   33.77    5.58
   0  -7   0    1.32    2.74
   0   7   0    2.99    2.29
   0   7   0    1.65    2.91
   1  -7   0  219.44    9.57
  -1  -7   0  205.97    9.59
   1   7   0  208.46    9.48
  -1   7   0  220.16    9.77
  -1   7   0  212.62    9.19
   1   7   0  217.71    7.47
  -2  -7   0  143.32    7.49
  -2  -7   0  142.35    7.71
   2  -7   0  146.64    7.40
  -2  -7   0  141.37    7.57
  -2   7   0  141.90    7.61
   2   7   0  137.43    7.47
  -2   7   0  134.28    7.65
  -2   7   0  146.90    7.94
  -3  -7   0   49.43    4.72
   3  -7   0   46.42    4.17
  -3  -7   0   48.09    4.88
  -3   7   0   36.59    4.48
   3   7   0   47.80    4.41
  -3   7   0   42.30    4.59
  -3   7   0   50.36    5.97
   4  -7   0    0.18    1.97
  -4  -7   0    1.72    2.78
  -4  -7   0    1.28    2.26
  -4   7   0    4.85    3.93
  -4   7   0    2.45    2.95
  -4   7   0    0.26    2.70
   4   7   0    0.72    2.11
  -5  -7   0   38.46    4.70
  -5  -7   0   38.73    3.19
  -5  -7   0   40.31    4.44
  -5  -7   0   31.75    4.47
  -5   7   0   37.06    4.44
  -5   7   0   29.77    5.82
  -5   7   0   32.97    4.36
  -6  -7   0  106.63    5.68
  -6  -7   0   96.94    7.04
  -6  -7   0   94.72    6.66
  -6  -7   0  105.65    7.13
  -6   7   0  103.81    6.90
  -6   7   0  107.65    9.93
  -6   7   0  113.46    7.25
  -7  -7   0   70.46    6.12
  -7  -7   0   69.08    6.30
  -7  -7   0   65.84    5.85
  -7   7   0   61.93    5.91
  -7   7   0   67.39    5.81
  -7   7   0   63.71    9.01
  -8  -7   0   71.15    6.27
  -8  -7   0   66.16    6.63
  -8  -7   0   68.21    6.36
  -8   7   0   62.38    9.56
  -8   7   0   65.01    6.13
  -8   7   0   72.95    6.00
  -9  -7   0   56.26    6.29
  -9  -7   0   54.52    6.43
  -9  -7   0   64.99    6.16
  -9   7   0   55.79    5.76
  -9   7   0   60.83   10.11
  -9   7   0   51.73    5.89
 -10  -7   0   86.19    8.05
 -10  -7   0   92.72    8.49
 -10   7   0   96.70   12.79
 -10   7   0  101.87    8.34
 -11  -7   0   -9.14    5.05
 -11  -7   0    3.61    5.02
 -11   7   0    3.85    7.81
 -11   7   0   -3.92    4.42
   0  -8   0   81.10    6.39
   0   8   0   77.59    5.04
   0   8   0   76.98    6.09
   1  -8   0   45.02    4.88
  -1  -8   0   47.86    5.33
   1   8   0   46.75    4.90
  -1   8   0   52.84    5.43
   1   8   0   47.62    3.23
  -1   8   0   58.88    5.01
  -2  -8   0   64.93    5.73
  -2  -8   0   59.86    5.65
   2  -8   0   63.00    5.53
   2   8   0   68.42    5.81
  -2   8   0   66.72    5.95
  -2   8   0   69.82    6.07
  -2   8   0   73.42    5.95
  -3  -8   0   21.52    3.72
  -3  -8   0   17.90    3.73
   3  -8   0   12.81    3.13
  -3  -8   0   16.72    3.82
  -3   8   0   16.77    4.35
   3   8   0   23.59    3.65
  -3   8   0   17.37    3.96
  -3   8   0   18.90    3.82
   4  -8   0   38.87    3.95
  -4  -8   0   42.24    4.83
  -4  -8   0   45.74    4.95
  -4  -8   0   40.16    5.03
  -4   8   0   41.78    4.91
  -4   8   0   42.85    5.09
  -4   8   0   40.58    6.10
   4   8   0   39.57    4.13
  -5  -8   0    2.54    3.06
  -5  -8   0    1.83    3.13
  -5  -8   0   -0.62    2.76
  -5   8   0   -2.38    4.13
  -5   8   0    1.69    3.29
  -5   8   0    9.76    3.50
  -6  -8   0   11.44    3.63
  -6  -8   0    8.17    3.76
  -6  -8   0   16.85    3.99
  -6   8   0   16.61    4.03
  -6   8   0   25.32    4.51
  -6   8   0   20.66    5.94
  -7  -8   0  168.00    9.58
  -7  -8   0  174.84   10.12
  -7  -8   0  191.30   10.02
  -7   8   0  187.32    9.90
  -7   8   0  168.51   12.61
  -7   8   0  184.07    9.64
  -8  -8   0   10.97    4.80
  -8  -8   0    8.46    4.16
  -8  -8   0   10.42    4.47
  -8   8   0   13.68    4.43
  -8   8   0   18.39    6.93
  -8   8   0    9.67    4.27
  -9  -8   0    0.65    4.28
  -9  -8   0    0.34    4.08
  -9  -8   0    7.98    4.88
  -9   8   0    3.97    3.78
  -9   8   0   -0.06    6.34
  -9   8   0    0.15    4.38
 -10  -8   0    3.85    5.10
 -10  -8   0   12.64    5.23
 -10   8   0    7.77    4.89
 -10   8   0   -5.41    6.85
 -11  -8   0   -7.09    5.10
 -11  -8   0   -8.85    5.35
 -11   8   0    1.44    5.30
 -11   8   0   -1.68    7.10
   0  -9   0   -0.83    2.84
   0   9   0    3.81    2.44
   0   9   0    2.36    3.46
  -1  -9   0  447.77   16.98
   1  -9   0  472.07   16.88
  -1   9   0  437.66   16.97
   1   9   0  453.99   14.65
  -1   9   0  450.44   16.32
   1   9   0  429.96   16.70
   2  -9   0  513.69   18.34
  -2  -9   0  488.43   18.75
  -2  -9   0  521.06   18.87
  -2  -9   0  537.99   19.17
  -2   9   0  497.73   18.71
   2   9   0  531.72   18.51
  -2   9   0  483.57   18.55
  -3  -9   0  116.47    7.89
  -3  -9   0  115.11    7.41
  -3  -9   0  121.06    7.73
   3  -9   0  129.94    7.31
  -3   9   0  137.00    8.03
  -3   9   0  108.28    7.78
   3   9   0  116.34    7.29
  -3   9   0  118.57    8.33
   4  -9   0   -0.09    2.43
  -4  -9   0   -0.05    2.94
  -4  -9   0    1.04    2.75
  -4  -9   0   -3.35    2.93
  -4   9   0   -0.66    3.23
  -4   9   0    3.88    3.30
  -4   9   0    7.76    4.31
   4   9   0   -5.67    2.30
  -5  -9   0  123.32    8.20
  -5  -9   0  115.21    7.77
  -5  -9   0  132.45    8.51
  -5   9   0  115.70    9.51
  -5   9   0  120.04    8.13
  -5   9   0  116.75    8.10
  -6  -9   0  106.78    8.32
  -6  -9   0  108.93    8.34
  -6  -9   0  105.48    7.68
  -6   9   0  114.44    8.27
  -6   9   0  109.19   10.80
  -6   9   0  121.19    8.29
  -7  -9   0   12.52    4.09
  -7  -9   0   18.96    4.86
  -7  -9   0   21.08    5.01
  -7   9   0   21.28    4.76
  -7   9   0   11.49    6.28
  -7   9   0   16.61    4.71
  -8  -9   0    6.74    4.34
  -8  -9   0   10.08    4.47
  -8  -9   0    1.80    4.54
  -8   9   0   -0.16    3.52
  -8   9   0    8.31    4.32
  -8   9   0    4.32    6.15
  -9  -9   0  105.26    9.02
  -9  -9   0  114.57    9.42
  -9  -9   0   91.76    8.90
  -9   9   0   79.72   11.99
  -9   9   0  124.51    8.96
  -9   9   0  104.52    8.65
 -10  -9   0   36.95    7.15
 -10  -9   0   35.03    6.80
 -10  -9   0   36.53    6.05
 -10   9   0   35.56    9.70
 -10   9   0   35.67    6.68
 -11  -9   0   16.19    6.58
 -11  -9   0   17.32    6.69
 -11   9   0   14.28    5.86
 -11   9   0   10.50    8.72
   0 -10   0   31.92    4.92
   0  10   0   30.62    4.86
   0  10   0   29.94    3.82
   1 -10   0   92.33    7.44
  -1 -10   0   95.18    7.62
  -1  10   0  104.15    6.83
   1  10   0  101.57    4.99
  -1  10   0   95.91    7.80
   1  10   0  102.21    7.60
  -2 -10   0    5.73    3.40
  -2 -10   0    5.97    3.35
  -2 -10   0    6.88    3.06
   2 -10   0    4.49    3.27
  -2  10   0    5.65    3.59
   2  10   0    4.20    3.21
  -2  10   0    4.88    3.53
  -3 -10   0  211.41   10.89
  -3 -10   0  229.06   11.10
  -3 -10   0  203.91   10.46
   3 -10   0  221.26   10.23
   3  10   0  215.58   10.35
  -3  10   0  216.17   10.82
  -3  10   0  205.01   11.05
  -3  10   0  184.36   10.56
   4 -10   0  363.36   13.89
  -4 -10   0  353.46   14.99
  -4 -10   0  366.15   15.22
  -4 -10   0  357.17   15.27
  -4  10   0  351.65   15.09
   4  10   0  370.56   14.20
  -4  10   0  351.12   15.04
  -4  10   0  341.91   16.12
  -5 -10   0    6.00    3.79
  -5 -10   0    9.53    3.56
  -5 -10   0    7.81    4.20
  -5  10   0    5.52    4.94
  -5  10   0   12.42    4.23
  -5  10   0    4.87    4.05
  -6 -10   0   13.46    4.50
  -6 -10   0   16.16    4.40
  -6 -10   0   15.16    4.71
  -6  10   0   16.43    4.77
  -6  10   0    6.65    4.39
  -6  10   0   17.65    6.00
  -7 -10   0  265.89   13.40
  -7 -10   0  262.35   13.27
  -7 -10   0  246.22   12.70
  -7  10   0  224.18   15.16
  -7  10   0  236.08   12.41
  -7  10   0  250.41   12.73
  -8 -10   0  158.46   10.83
  -8 -10   0  174.24   11.42
  -8 -10   0  143.02   10.42
  -8  10   0  169.22   10.87
  -8  10   0  193.55   10.94
  -8  10   0  146.19   14.45
  -9 -10   0    4.21    4.64
  -9 -10   0    1.26    5.03
  -9 -10   0   -1.76    4.55
  -9  10   0   -1.68    4.50
  -9  10   0    5.59    7.24
  -9  10   0    1.87    4.69
 -10 -10   0    2.55    5.35
 -10 -10   0   -3.44    4.18
 -10 -10   0   -1.53    5.48
 -10  10   0    5.38    7.97
 -10  10   0    4.60    5.40
 -11 -10   0   19.16    7.28
 -11 -10   0   17.21    6.79
 -11  10   0   18.84    6.75
 -11  10   0   18.20    9.78
   0 -11   0    0.52    3.19
   0  11   0    0.54    2.55
   0  11   0    0.90    3.53
   1 -11   0  215.49   11.43
  -1 -11   0  233.84   11.71
   1  11   0  213.18   11.40
  -1  11   0  232.17   10.63
   1  11   0  235.43    8.81
  -1  11   0  229.96   11.66
  -2 -11   0    0.00    3.29
  -2 -11   0   10.14    5.44
  -2 -11   0    1.47    2.71
   2 -11   0    1.70    3.25
  -2  11   0    2.10    3.68
  -2  11   0    3.28    3.55
  -2  11   0    5.38    3.64
   2  11   0    7.90    3.84
   3 -11   0    6.08    3.41
  -3 -11   0    6.35    3.30
  -3 -11   0    9.67    3.90
  -3 -11   0    5.73    3.81
   3  11   0    8.51    3.73
  -3  11   0    7.60    4.13
  -3  11   0    2.83    3.88
  -3  11   0    7.42    4.03
  -4 -11   0    3.38    3.75
  -4 -11   0    2.27    3.15
   4 -11   0    3.84    3.28
  -4 -11   0    3.74    3.74
   4  11   0    3.20    3.33
  -4  11   0   10.84    4.19
  -4  11   0    6.95    4.59
  -4  11   0    8.26    4.29
  -5 -11   0  556.47   22.06
  -5 -11   0  611.11   22.90
  -5 -11   0  567.18   22.16
  -5  11   0  592.88   22.17
  -5  11   0  579.38   22.34
  -5  11   0  586.39   23.98
  -6 -11   0    5.93    4.13
  -6 -11   0    5.78    4.56
  -6 -11   0    3.68    4.12
  -6  11   0   13.30    4.99
  -6  11   0   13.29    5.13
  -6  11   0    9.75    6.03
  -7 -11   0   20.42    5.73
  -7 -11   0   24.09    5.27
  -7 -11   0   21.09    5.42
  -7  11   0   21.21    5.61
  -7  11   0   25.29    5.77
  -7  11   0   10.33    6.34
  -8 -11   0   24.37    6.32
  -8 -11   0   16.96    5.92
  -8 -11   0   17.34    5.45
  -8  11   0   13.32    7.87
  -8  11   0   18.60    5.87
  -8  11   0   18.36    5.83
  -9 -11   0    6.92    5.15
  -9 -11   0    0.71    4.72
  -9 -11   0    3.21    5.01
  -9  11   0    3.43    7.15
  -9  11   0    8.64    5.54
  -9  11   0   15.04    5.50
 -10 -11   0    0.06    5.67
 -10 -11   0    0.66    5.65
 -10 -11   0   10.90    5.52
 -10  11   0    5.51    5.94
 -10  11   0    4.90    7.69
   0 -12   0  374.73   15.74
   0  12   0  323.06   15.29
   0  12   0  363.65   13.64
   1 -12   0  108.37    8.48
  -1 -12   0   89.88    8.10
   1  12   0   88.96    5.34
   1  12   0   89.42    7.97
  -1  12   0  105.32    8.73
  -1  12   0  107.47    7.21
  -2 -12   0    0.89    3.62
   2 -12   0    9.89    3.87
  -2  12   0   11.12    4.22
   2  12   0   -0.54    3.51
  -2  12   0   -4.17    3.55
   3 -12   0   66.27    6.75
  -3 -12   0   64.60    7.55
  -3 -12   0   66.52    6.75
  -3  12   0   72.16    7.78
  -3  12   0   67.76    7.49
   3  12   0   66.63    6.91
  -4 -12   0   20.81    5.17
  -4 -12   0   24.69    4.78
   4  12   0   25.26    4.79
  -4  12   0   23.40    5.35
  -4  12   0   25.23    5.54
  -4  12   0   17.98    5.86
  -5 -12   0  102.62    8.47
  -5 -12   0  107.59    9.51
  -5  12   0   90.46    8.80
  -5  12   0   92.55    8.60
  -5  12   0   89.63    9.77
  -6 -12   0   21.94    6.13
  -6 -12   0   37.42    6.05
  -6  12   0   29.72    6.42
  -6  12   0   25.27    6.97
  -6  12   0   49.11    7.36
  -7 -12   0  152.85   11.44
  -7 -12   0  144.73   10.45
  -7  12   0  109.54   12.10
  -7  12   0  156.35   11.44
  -7  12   0  146.85   11.08
  -8 -12   0   55.46    8.16
  -8 -12   0   61.49    8.17
  -8  12   0   71.85    8.79
  -8  12   0   52.03   10.09
  -8  12   0   52.01    7.71
  -9 -12   0   41.49    7.11
  -9 -12   0   26.16    7.00
  -9  12   0   49.43    7.91
  -9  12   0   23.61    8.72
  -9  12   0   51.04    7.97
 -10 -12   0    9.34    5.73
 -10 -12   0    2.99    5.57
 -10  12   0    7.97    6.73
 -10  12   0   -2.12    5.43
 -10  12   0   10.38    8.50
   0 -13   0    1.37    3.70
   0  13   0   -1.36    3.72
   0  13   0   -1.62    2.75
   1 -13   0  304.36   14.52
  -1 -13   0  298.97   14.56
   1  13   0  300.51   14.66
  -1  13   0  299.29   13.19
  -1  13   0  302.77   14.91
  -2 -13   0  260.84   13.81
   2 -13   0  281.51   13.60
  -2  13   0  275.66   13.13
   2  13   0  274.90   13.78
  -2  13   0  273.31   13.96
  -3 -13   0   35.61    6.35
   3 -13   0   47.67    6.20
   3  13   0   51.79    6.57
  -3  13   0   49.32    6.99
  -3  13   0   57.03    7.32
  -4 -13   0  131.11   10.73
  -4  13   0   96.11    9.19
  -4  13   0  116.24   10.79
  -5 -13   0   81.20    8.72
  -5  13   0   88.77    9.93
  -5  13   0   87.85    8.99
  -6 -13   0  142.75   10.56
  -6 -13   0  130.49   11.26
  -6  13   0  150.10   11.62
  -6  13   0  150.43   13.11
  -7 -13   0   26.58    6.60
  -7 -13   0   40.46    6.49
  -7  13   0   33.19    7.18
  -7  13   0   33.91    8.56
  -8 -13   0   12.98    5.64
  -8 -13   0    4.32    5.67
  -8  13   0   13.22    6.42
  -8  13   0   -3.24    6.60
  -9 -13   0   40.98    7.43
  -9 -13   0   51.78    8.94
  -9  13   0   49.87    8.39
  -9  13   0   26.26    9.18
 -10 -13   0   33.47    7.47
 -10 -13   0   36.95    8.29
 -10  13   0   34.52   10.25
 -10  13   0   21.62    7.51
   0 -14   0   72.87    8.34
   0  14   0   79.69    6.17
   0  14   0   55.79    7.44
   1 -14   0   19.01    5.04
  -1 -14   0   13.22    5.12
  -1  14   0   13.99    4.52
   1  14   0   10.47    4.90
  -1  14   0   13.34    5.29
   2 -14   0   32.68    5.95
  -2 -14   0   35.30    6.65
  -2  14   0   21.61    5.39
   2  14   0   18.71    5.55
  -2  14   0   22.00    6.01
  -3 -14   0   99.89    9.70
   3 -14   0   82.86    8.32
  -3  14   0  113.41   10.06
   3  14   0   98.11    9.05
  -3  14   0  108.60    9.98
  -4 -14   0    6.38    4.92
  -4  14   0    3.65    4.83
  -4  14   0    5.34    5.20
  -5 -14   0    6.26    5.01
  -5  14   0    3.77    5.16
  -5  14   0    3.01    5.47
  -6 -14   0   39.04    7.36
  -6  14   0   38.34    7.58
  -6  14   0   36.53    8.25
  -7 -14   0    2.37    5.39
  -7  14   0    2.40    5.87
  -7  14   0   -1.84    6.61
  -8 -14   0    1.20    6.18
  -8  14   0    8.29    6.21
  -8  14   0    8.70    7.51
  -9 -14   0    3.85    6.73
  -9  14   0   12.42    8.36
  -9  14   0    5.35    6.83
   0 -15   0   -2.64    3.98
   0  15   0    2.00    4.74
  -1 -15   0   18.52    5.53
   1 -15   0   18.72    5.76
  -1  15   0   33.16    5.50
   1  15   0   18.30    5.84
  -1  15   0   21.30    6.13
  -2 -15   0   28.66    6.67
   2 -15   0   12.12    5.14
  -2  15   0   23.77    5.57
  -2  15   0    9.04    5.42
   2  15   0   21.54    6.13
   3 -15   0  133.87   11.01
  -3 -15   0  109.79   10.42
  -3  15   0  139.55   10.64
  -3  15   0  106.69   10.54
   3  15   0  122.31   10.36
  -4 -15   0   -2.27    4.85
  -4  15   0   -1.33    4.97
  -4  15   0    5.73    5.21
  -5 -15   0   22.24    6.01
  -5  15   0   31.81    7.27
  -5  15   0   32.04    7.48
  -6 -15   0   27.83    7.66
  -6  15   0   42.56    8.76
  -6  15   0   46.18    8.30
  -7 -15   0   20.41    6.98
  -7  15   0   16.79    7.14
  -7  15   0   32.16    8.53
  -8 -15   0    3.84    6.53
  -8  15   0    6.75    7.14
  -8  15   0   -6.75    6.08
  -9 -15   0   21.58    7.00
  -9  15   0   33.61   10.21
  -9  15   0   38.97    8.82
   0 -16   0   67.45    8.97
   0  16   0   69.31    8.72
   1 -16   0   53.46    8.09
  -1 -16   0   52.37    8.04
  -1  16   0   55.82    6.68
  -1  16   0   42.23    7.72
   1  16   0   34.38    7.18
   2 -16   0   -6.52    4.21
  -2 -16   0    1.85    4.78
  -2  16   0    0.58    4.76
   2  16   0    8.30    5.55
  -2  16   0   -3.97    4.32
   3 -16   0  168.09   12.85
  -3 -16   0  172.70   12.88
  -3  16   0  142.21   11.36
  -3  16   0  141.01   12.26
   3  16   0  167.59   12.12
  -4 -16   0  321.07   17.32
  -4  16   0  303.76   16.70
  -4  16   0  302.39   16.47
  -5 -16   0   48.65    8.35
  -5  16   0   46.64    8.63
  -5  16   0   69.93    9.15
  -6 -16   0   14.38    6.64
  -6  16   0   12.05    7.33
  -6  16   0   25.46    7.57
  -7 -16   0   57.05    9.36
  -7  16   0   52.08    8.98
  -7  16   0   57.84   10.57
  -8 -16   0   30.75    8.86
  -8  16   0   54.42    9.82
  -8  16   0   51.63   10.37
  -9 -16   0   25.42    7.42
  -9  16   0   24.51    8.29
  -9  16   0   18.82    9.34
   0 -17   0   -6.28    4.29
   0  17   0    2.56    5.50
   1 -17   0    8.60    5.55
  -1 -17   0    3.50    5.49
  -1  17   0    2.51    5.61
   1  17   0   -1.23    5.61
   2 -17   0   38.61    7.38
  -2 -17   0   30.13    7.19
  -2  17   0   38.97    6.98
  -2  17   0   37.27    7.49
   2  17   0   32.40    7.25
  -3 -17   0   -0.92    5.17
   3  17   0   -4.95    4.81
  -3  17   0    7.36    5.86
  -3  17   0   -6.14    4.62
  -4 -17   0    4.38    5.78
  -4  17   0   -4.48    5.88
  -4  17   0   13.14    6.56
  -5 -17   0   14.72    6.83
  -5  17   0    0.44    6.48
  -5  17   0   24.30    7.45
  -6 -17   0    3.27    6.06
  -6  17   0   11.46    7.12
  -6  17   0    7.43    6.82
  -7 -17   0   -4.98    6.15
  -7  17   0    3.17    6.72
  -7  17   0   -1.05    6.53
  -8 -17   0    7.36    6.90
  -8  17   0    3.10    7.69
  -8  17   0   -2.39    7.10
   0 -18   0   41.57    8.15
   0  18   0   29.75    7.61
  -1 -18   0   11.36    6.09
   1 -18   0   -2.50    5.47
   1  18   0    2.80    6.15
  -1  18   0   -1.40    6.11
   2 -18   0   -5.51    5.50
  -2 -18   0   12.60    6.50
  -2  18   0    8.16    6.53
   2  18   0    0.25    5.79
  -3 -18   0    1.95    5.68
  -3  18   0    5.05    5.47
  -3  18   0    4.89    6.27
  -4 -18   0   54.57    8.94
  -4  18   0   40.38    8.36
  -4  18   0   52.39    9.29
  -5 -18   0   37.37    8.18
  -5  18   0   28.67    8.13
  -5  18   0   20.08    8.03
  -6 -18   0   -2.10    6.14
  -6  18   0   -8.43    5.86
  -6  18   0   -2.66    6.53
  -7 -18   0   14.52    8.14
  -7  18   0   15.96    7.88
  -7  18   0   34.40    8.77
  -8 -18   0   31.82    9.48
  -8  18   0   48.76   10.08
  -8  18   0   32.36    9.61
   0 -19   0   -0.43    5.89
   0  19   0    0.18    6.40
   1 -19   0  100.16   11.11
  -1 -19   0   99.51   11.39
   1  19   0  110.45   12.10
  -1  19   0  116.91   12.45
  -2 -19   0  189.31   16.45
   2 -19   0  168.30   14.21
  -2  19   0  184.67   15.76
   2  19   0  166.25   14.21
  -3 -19   0   80.49   10.92
  -3  19   0   73.60   10.46
  -3  19   0   67.13   10.36
  -4 -19   0    3.57    6.51
  -4  19   0   13.75    7.47
  -4  19   0   11.96    7.11
  -5 -19   0   58.87   10.56
  -5  19   0   53.35    9.43
  -5  19   0   62.09   10.12
  -6 -19   0   65.87   11.28
  -6  19   0   73.25   11.10
  -6  19   0   66.68   11.17
  -7 -19   0   -4.74    7.00
  -7  19   0    7.91    7.37
  -7  19   0   -3.93    6.91
   0 -20   0   16.49    7.52
   0  20   0   23.84    8.27
   1 -20   0    7.85    7.26
  -1 -20   0   -4.27    6.33
   1  20   0    3.82    6.96
  -1  20   0    3.55    7.14
  -2 -20   0   18.78    8.19
  -2  20   0   25.48    8.77
   2  20   0   23.30    8.05
  -3 -20   0    7.32    6.84
  -3  20   0    5.93    6.92
  -4 -20   0    1.30    6.94
  -4  20   0    2.13    7.10
  -4  20   0    6.56    6.75
  -5 -20   0    1.79    6.87
  -5  20   0  -11.52    6.11
  -5  20   0    3.23    6.70
  -6 -20   0   24.60    8.92
  -6  20   0   31.37    8.97
  -6  20   0    9.92    7.83
   0 -21   0   -2.57    6.31
   0  21   0  -10.21    6.93
   1 -21   0   43.16    9.68
  -1 -21   0   62.63   11.65
  -1  21   0   62.20   11.10
   1  21   0   48.57   10.21
  -2 -21   0   27.45    8.71
  -2  21   0   37.89    9.58
   2  21   0   30.27    8.81
  -3 -21   0   -4.30    6.73
  -3  21   0   10.09    8.34
  -4 -21   0   -8.42    6.88
  -4  21   0   -8.83    7.08
  -5 -21   0    8.05    7.79
  -5  21   0    4.26    7.35
  -5  21   0   11.59    7.93
   0 -22   0   85.22   13.00
   0  22   0   61.90   11.54
   1 -22   0   65.79   11.36
  -1 -22   0   81.38   12.89
  -1  22   0   73.33   12.01
   1  22   0   55.47   10.96
  -2 -22   0   16.42    8.41
  -2  22   0    5.01    8.43
  -3 -22   0   24.62   10.06
  -3  22   0   19.71    9.25
  -4 -22   0    0.19    8.07
  -4  22   0   15.87    9.02
   0 -23   0    1.43    7.99
   0  23   0    4.80    8.81
  -1 -23   0   -0.87    7.73
  -1  23   0   13.70    9.62
   1  23   0    5.70    8.75
  -2 -23   0   10.92    9.12
  -2  23   0   -3.88    8.85
  -3 -23   0    0.27    8.39
  -3  23   0   -1.13    8.28
 -12   0   1    8.50    7.17
 -11   0   1   -1.93    5.68
 -10   0   1   10.58    6.32
  -9   0   1   -0.42    5.08
  -8   0   1   -1.10    4.23
  -7   0   1   -7.01    3.68
  -6   0   1   -3.42    3.39
  -5   0   1   -1.40    3.16
  -4   0   1   -0.49    2.77
  -3   0   1    3.89    2.81
  -2   0   1    7.15    2.41
  -1   0   1    0.12    1.44
  -1   0   1    1.36    0.76
   0   0   1   -0.91    0.58
   0   0  -1   -0.56    0.54
  -1   0  -1    2.00    1.05
   1   0   1    3.50    0.98
  -2   0  -1   -0.67    1.16
  -3   0  -1   -1.13    1.30
  -4   0  -1   -1.74    1.34
  -4   0  -1    0.22    1.24
  -5   0  -1    6.56    1.44
  -5   0  -1    4.53    3.39
  -6   0  -1    1.25    1.31
  -6   0  -1    2.75    3.89
  -7   0  -1   -6.68    3.55
  -8   0  -1    2.25    4.48
  -9   0  -1   10.83    5.66
 -10   0  -1    2.31    5.60
 -11   0  -1    4.39    6.30
 -12   1   1   15.50    8.14
 -11  -1   1  101.71   11.57
 -11   1   1  101.64   11.99
 -10  -1   1    7.68    6.05
 -10   1   1    6.98    6.42
  -9  -1   1   13.10    5.36
  -9   1   1   22.83    7.04
  -8  -1   1   54.47    7.36
  -8   1   1   65.00    8.48
  -7  -1   1  132.22    9.22
  -7   1   1  120.18    9.43
  -6  -1   1   72.79    6.79
  -6   1   1   72.08    7.37
  -5  -1   1  199.27    9.66
  -5   1   1  199.46   10.32
  -4  -1   1  295.43   11.74
  -4   1   1  309.73   12.41
  -3  -1   1  154.37    7.20
  -3   1   1  163.31    7.75
  -2  -1   1  121.94    5.52
  -2   1   1  115.76    5.86
  -1  -1   1  379.74   12.36
  -1  -1   1  408.60   12.11
  -1   1   1  407.98   12.35
  -1   1   1  421.86   12.07
   1   1  -1  410.32   12.16
  -1   1   1  425.54   13.13
  -1   1   1  390.99   12.32
   0  -1   1 1699.62   48.76
   0   1   1 1699.73   48.75
   0   1  -1 1718.32   48.77
  -1  -1  -1  230.82    7.48
   1  -1   1  221.91    7.32
   1   1   1  238.98    7.41
  -1   1  -1  231.70    7.41
  -2  -1  -1   51.60    2.82
  -2  -1  -1   50.28    2.91
  -2  -1  -1   57.10    3.12
  -2   1  -1   48.87    2.71
  -2   1  -1   46.60    2.81
  -3  -1  -1   73.07    3.44
  -3  -1  -1   74.02    3.57
  -3  -1  -1   68.88    3.25
  -3   1  -1   70.54    3.38
  -4  -1  -1  200.63    7.02
  -4   1  -1  209.41    6.86
  -4   1  -1  191.61    6.80
  -5  -1  -1   54.20    5.59
  -5  -1  -1   51.61    3.31
  -5  -1  -1   53.43    3.27
  -5   1  -1   53.71    3.10
  -5   1  -1   60.89    3.19
  -5   1  -1   68.19    6.55
  -6  -1  -1   19.56    2.25
  -6  -1  -1   18.07    2.23
  -6  -1  -1   17.81    4.38
  -6   1  -1   14.01    2.04
  -6   1  -1   20.06    4.97
  -7  -1  -1   18.90    4.89
  -7   1  -1   14.71    2.29
  -7   1  -1   15.91    5.25
  -8  -1  -1   93.80    9.25
  -8  -1  -1   98.17    5.22
  -8   1  -1  107.43   10.38
  -9  -1  -1   28.43    6.54
  -9   1  -1   27.01    7.00
 -10  -1  -1    8.97    5.89
 -10   1  -1    9.46    6.57
 -11  -1  -1   19.30    7.23
 -11   1  -1    4.55    6.92
 -12   1  -1   12.55    7.78
 -12   2   1  -15.68    6.79
 -11   2   1   12.23    7.98
 -10  -2   1   20.47    6.67
 -10   2   1   24.75    8.16
  -9  -2   1   67.85    8.25
  -9   2   1   65.22    9.33
  -8  -2   1   24.56    5.64
  -8   2   1   28.50    6.51
  -7  -2   1   18.14    4.60
  -7   2   1   17.97    5.51
  -6  -2   1  127.71    7.90
  -6   2   1  117.07    9.00
  -5  -2   1  350.76   13.77
  -5   2   1  359.93   14.82
  -4  -2   1   93.48    5.85
  -4   2   1   95.91    6.64
  -3  -2   1   87.36    4.96
  -3  -2   1   82.79    3.59
  -3   2   1   54.33    5.24
  -2  -2   1   64.32    3.67
  -2  -2   1   57.33    2.90
  -2  -2   1   54.30    3.07
  -2   2   1   52.27    4.41
  -2   2   1   45.67    2.73
  -2   2   1   43.97    2.71
  -2   2   1   44.93    3.02
  -1  -2   1 1348.91   40.29
  -1  -2   1 1381.88   39.13
   1  -2  -1 1383.53   38.98
  -1   2   1 1320.70   40.21
   1   2  -1 1417.85   39.05
  -1   2   1 1356.77   40.68
  -1   2   1 1346.86   39.06
  -1   2   1 1258.02   40.18
   0  -2  -1    9.53    1.61
   0  -2   1   11.65    1.69
   0   2   1   12.56    1.61
   0   2   1   14.46    1.92
   0   2  -1   13.80    1.86
   1  -2   1  109.67    4.65
  -1  -2  -1  116.73    4.82
  -1   2  -1  115.54    4.76
   1   2   1  117.41    4.73
  -2  -2  -1 1139.60   33.72
  -2  -2  -1 1138.58   34.70
   2  -2   1 1130.13   33.39
  -2  -2  -1 1186.92   34.77
   2   2   1 1121.96   33.46
  -2   2  -1 1178.18   33.69
  -2   2  -1 1176.65   34.62
  -3  -2  -1  236.16    8.34
  -3  -2  -1  246.73    8.51
  -3  -2  -1  249.02    8.46
  -3   2  -1  248.22    8.26
  -3   2  -1  239.02    8.24
  -4  -2  -1    5.38    1.87
  -4  -2  -1    6.89    1.66
  -4  -2  -1    6.34    1.85
  -4   2  -1    6.79    1.77
  -4   2  -1    6.23    1.58
  -5  -2  -1  215.14    7.52
  -5  -2  -1  201.30    7.46
  -5  -2  -1  183.40    9.18
  -5  -2  -1  194.91    7.30
  -5   2  -1  198.52    7.18
  -5   2  -1  192.90   10.30
  -6  -2  -1  435.57   14.06
  -6  -2  -1  422.52   16.66
  -6  -2  -1  425.10   14.19
  -6  -2  -1  442.65   14.30
  -6   2  -1  421.59   17.88
  -6   2  -1  435.83   13.79
  -6   2  -1  433.69   13.85
  -7  -2  -1    8.56    2.32
  -7  -2  -1    5.40    3.78
  -7   2  -1    5.47    1.87
  -7   2  -1    4.33    4.65
  -8  -2  -1   15.51    5.09
  -8   2  -1   15.47    6.15
  -8   2  -1   13.92    2.53
  -9  -2  -1  103.84    9.80
  -9   2  -1  119.81   12.02
 -10  -2  -1  220.61   13.67
 -10   2  -1  177.49   15.62
 -11   2  -1   39.71    9.57
 -12   2  -1    3.10    8.12
 -12   3   1   -2.22    8.18
 -11   3   1    9.58    8.06
 -10  -3   1   59.85    9.29
 -10   3   1   46.77    9.93
  -9  -3   1    3.73    4.56
  -9   3   1    2.04    6.07
  -8  -3   1   -6.21    3.65
  -8   3   1    1.23    5.38
  -7  -3   1   41.52    5.58
  -7  -3   1   44.90    3.59
  -7   3   1   55.42    7.73
  -6  -3   1   94.10    4.60
  -6  -3   1   93.44    4.47
  -6  -3   1   99.82    6.68
  -6   3   1   88.77    8.44
  -5  -3   1    0.04    2.58
  -5  -3   1    0.59    1.68
  -5   3   1   -3.71    3.32
  -5   3   1    0.44    1.52
  -4  -3   1    2.08    2.39
  -4  -3   1    1.62    1.82
  -4  -3   1    0.34    1.46
  -4   3   1    1.57    3.19
  -4   3   1    3.45    1.69
  -3  -3   1    8.42    2.49
  -3  -3   1    4.38    1.98
  -3  -3   1    6.24    1.76
  -3   3   1    3.87    1.59
  -3   3   1    1.46    2.87
  -3   3   1    5.44    1.72
  -3   3   1    5.28    1.86
  -2  -3   1  469.35   15.15
  -2  -3   1  454.51   15.38
  -2   3   1  479.67   15.31
   2   3  -1  464.96   14.78
  -2   3   1  494.98   16.60
  -2   3   1  497.97   15.32
  -2   3   1  501.01   15.07
   1  -3  -1   14.17    2.21
  -1  -3   1   17.44    2.33
  -1  -3   1   17.37    2.39
  -1   3   1   14.39    2.58
  -1   3   1   16.54    2.74
  -1   3   1   10.64    2.34
  -1   3   1   10.50    2.21
   1   3  -1   21.46    2.58
   0  -3   1   48.45    3.66
   0  -3  -1   50.50    3.72
   0   3   1   59.54    3.93
   0   3  -1   48.61    3.72
   0   3   1   53.01    3.18
   1  -3   1  108.52    5.03
  -1  -3  -1  108.59    5.26
  -1   3  -1  107.21    5.18
   1   3   1  108.01    5.13
  -2  -3  -1   12.43    2.27
   2  -3   1   16.97    2.27
  -2  -3  -1   10.79    2.44
  -2  -3  -1   12.36    2.49
   2   3   1   11.48    2.17
  -2   3  -1   16.37    2.36
  -2   3  -1   18.22    2.58
  -3  -3  -1  574.59   18.54
  -3  -3  -1  564.20   18.13
  -3  -3  -1  570.79   18.49
  -3   3  -1  589.79   18.39
  -3   3  -1  594.73   18.05
  -4  -3  -1   23.24    2.59
  -4  -3  -1   17.84    2.65
  -4  -3  -1   18.09    2.59
  -4   3  -1   13.16    2.37
  -4   3  -1   17.76    2.28
  -5  -3  -1   70.40    5.49
  -5  -3  -1   71.33    4.32
  -5  -3  -1   78.03    4.58
  -5  -3  -1   77.61    4.63
  -5   3  -1   78.56    7.26
  -5   3  -1   68.72    4.21
  -5   3  -1   72.21    4.18
  -6  -3  -1    4.20    2.16
  -6  -3  -1    5.46    2.39
  -6  -3  -1    4.75    2.10
  -6  -3  -1    3.38    3.02
  -6   3  -1    6.16    2.14
  -6   3  -1    2.97    4.27
  -6   3  -1    2.68    1.96
  -7  -3  -1  171.49    7.60
  -7  -3  -1  168.62    9.58
  -7  -3  -1  162.51    7.35
  -7  -3  -1  174.93    7.44
  -7   3  -1  168.60    7.21
  -7   3  -1  158.63    7.08
  -7   3  -1  146.22   11.14
  -8  -3  -1   20.07    3.21
  -8  -3  -1   11.63    4.46
  -8  -3  -1   13.07    3.17
  -8  -3  -1   20.58    3.29
  -8   3  -1   12.56    2.65
  -8   3  -1   11.33    6.17
  -9  -3  -1    7.55    4.35
  -9  -3  -1    0.37    2.94
  -9  -3  -1   -1.68    3.06
  -9   3  -1   -5.46    5.69
 -10  -3  -1   -2.38    3.62
 -10  -3  -1    1.60    3.41
 -10   3  -1   -5.47    6.76
 -11  -3  -1    1.81    4.48
 -11  -3  -1    3.97    3.76
 -11   3  -1    8.35    7.76
 -12   3  -1   -8.40    7.49
 -12   4   1   -3.94    7.79
 -11   4   1    7.05    8.30
 -10   4   1   39.36    9.53
  -9  -4   1   98.67    9.15
  -9   4   1  117.09   12.31
  -8  -4   1   32.93    5.59
  -8  -4   1   29.71    3.48
  -8  -4   1   34.03    3.77
  -8   4   1   26.85    7.06
  -8   4   1   35.10    3.33
  -7  -4   1   90.80    7.14
  -7  -4   1   88.67    5.32
  -7  -4   1   82.71    5.13
  -7   4   1   88.18    4.81
  -7   4   1   92.69    9.46
  -6  -4   1  206.14    8.46
  -6  -4   1  222.40   10.05
  -6  -4   1  212.38    8.51
  -6   4   1  226.52   12.08
  -6   4   1  230.16    8.23
  -5  -4   1    1.42    2.00
  -5  -4   1    5.51    2.58
  -5  -4   1    3.79    1.92
  -5   4   1    1.28    1.88
  -5   4   1    0.43    1.80
  -5   4   1    3.31    1.97
  -5   4   1    7.10    3.99
  -4  -4   1   64.43    4.46
  -4  -4   1   59.62    4.35
  -4  -4   1   57.40    3.92
  -4   4   1   57.12    4.11
  -4   4   1   54.65    3.89
  -4   4   1   65.08    6.28
  -4   4   1   59.60    3.86
  -3  -4   1   30.67    3.09
  -3  -4   1   39.00    3.52
  -3  -4   1   39.94    3.16
  -3   4   1   39.18    3.40
   3   4  -1   32.80    2.69
  -3   4   1   38.77    3.50
  -3   4   1   43.74    3.39
  -3   4   1   40.57    5.03
  -2  -4   1 3018.63   84.95
  -2  -4   1 2915.90   87.43
   2  -4  -1 2936.56   84.44
  -2   4   1 2983.26   87.38
   2   4  -1 3018.94   84.59
  -2   4   1 2931.72   88.14
  -2   4   1 2852.18   87.33
  -2   4   1 2905.61   84.75
  -1  -4   1  378.60   13.37
   1  -4  -1  409.24   13.26
  -1   4   1  421.95   13.80
  -1   4   1  400.01   13.37
  -1   4   1  405.85   13.71
   1   4  -1  380.72   13.30
   0  -4  -1   59.92    4.48
   0  -4   1   61.49    4.48
   0   4   1   51.54    3.65
   0   4  -1   70.78    4.80
   0   4   1   56.13    4.58
   1  -4   1   38.60    3.53
  -1  -4  -1   26.34    3.23
   1   4   1   38.30    3.72
  -1   4  -1   38.09    3.52
  -2  -4  -1   61.46    4.71
   2  -4   1   64.01    4.40
  -2  -4  -1   70.80    4.60
  -2  -4  -1   81.27    4.96
   2   4   1   74.54    4.64
  -2   4  -1   72.74    4.57
  -2   4  -1   65.70    4.80
  -3  -4  -1    3.22    2.23
  -3  -4  -1    1.87    2.00
  -3  -4  -1    5.09    2.43
   3  -4   1    1.70    1.70
   3   4   1    2.27    1.88
  -3   4  -1    3.81    2.06
  -3   4  -1   -1.00    1.98
  -4  -4  -1   80.79    4.85
  -4  -4  -1   84.72    4.87
  -4  -4  -1   80.23    5.20
  -4  -4  -1   82.32    5.09
  -4   4  -1   84.06    5.01
  -4   4  -1   81.26    4.70
  -5  -4  -1   56.98    4.25
  -5  -4  -1   55.65    4.48
  -5  -4  -1   57.14    4.52
  -5  -4  -1   57.09    4.54
  -5   4  -1   50.13    4.18
  -5   4  -1   48.37    6.22
  -5   4  -1   54.01    4.16
  -6  -4  -1   39.55    4.64
  -6  -4  -1   32.33    3.56
  -6  -4  -1   30.39    3.60
  -6  -4  -1   28.48    3.58
  -6   4  -1   32.27    3.43
  -6   4  -1   36.40    3.65
  -6   4  -1   24.23    5.70
  -7  -4  -1  130.98    7.01
  -7  -4  -1  146.01    7.22
  -7  -4  -1  127.72    8.10
  -7  -4  -1  120.48    6.81
  -7   4  -1  146.24    6.99
  -7   4  -1  127.32   10.68
  -7   4  -1  138.71    6.67
  -8  -4  -1   20.25    3.88
  -8  -4  -1   11.64    3.28
  -8  -4  -1   19.46    3.55
  -8  -4  -1   16.79    4.49
  -8   4  -1   33.13    7.22
  -8   4  -1   20.32    3.26
  -8   4  -1   18.75    3.54
  -9  -4  -1    3.04    3.05
  -9  -4  -1    4.08    2.85
  -9  -4  -1   -5.31    3.35
  -9   4  -1   -0.16    5.96
  -9   4  -1    5.79    3.32
 -10  -4  -1   37.91    5.19
 -10  -4  -1   37.39    5.62
 -10   4  -1   59.11    5.49
 -10   4  -1   58.07   10.43
 -11  -4  -1   68.19    6.58
 -11  -4  -1   64.85    6.87
 -11   4  -1   74.26   11.60
 -12  -4  -1   -2.30    4.40
 -12  -4  -1   -4.21    5.00
 -12   4  -1    3.83    8.26
 -12   5   1    1.99    8.73
 -11  -5   1   82.08    7.28
 -11  -5   1   88.25    7.12
 -11   5   1   74.06   11.89
 -10  -5   1    6.08    4.22
 -10  -5   1    8.81    4.04
 -10   5   1   18.04    8.42
  -9  -5   1    0.70    3.06
  -9  -5   1    3.62    3.72
  -9   5   1    2.51    6.33
  -8  -5   1   20.71    3.62
  -8  -5   1   18.82    3.67
  -8  -5   1   26.60    4.94
  -8   5   1   22.46    6.93
  -8   5   1   18.74    3.46
  -8   5   1   25.43    3.48
  -7  -5   1  144.89    7.54
  -7  -5   1  164.59    7.71
  -7  -5   1  175.33    9.05
  -7   5   1  158.18    7.25
  -7   5   1  174.68    7.60
  -7   5   1  141.19   11.40
  -7   5   1  161.84    7.58
  -6  -5   1    4.60    2.56
  -6  -5   1    7.94    2.52
  -6  -5   1    8.03    3.06
  -6   5   1    4.32    2.61
  -6   5   1    2.61    2.43
  -6   5   1    7.78    2.47
  -6   5   1    5.97    4.54
  -5  -5   1    5.41    2.52
  -5  -5   1    4.23    2.30
  -5  -5   1    4.96    2.49
  -5   5   1    6.76    2.49
  -5   5   1    1.94    2.35
  -5   5   1    4.49    3.92
  -5   5   1    1.09    2.17
  -4  -5   1  573.33   18.22
  -4  -5   1  560.97   18.70
  -4  -5   1  574.98   18.47
  -4   5   1  543.63   18.47
  -4   5   1  573.18   21.01
  -4   5   1  572.12   18.27
  -4   5   1  542.44   18.50
  -3  -5   1 1028.44   31.27
  -3  -5   1  993.14   30.44
   3  -5  -1  997.56   29.55
  -3   5   1  992.77   31.04
  -3   5   1  989.85   30.96
  -3   5   1  937.96   32.39
  -3   5   1  989.44   30.24
   3   5  -1 1000.21   29.79
  -2  -5   1   71.52    5.23
  -2  -5   1   89.41    5.27
   2  -5  -1   73.10    4.74
  -2   5   1   73.36    5.61
  -2   5   1   84.18    5.37
   2   5  -1   84.14    5.10
  -2   5   1   72.44    5.04
  -2   5   1   75.54    5.30
   1  -5  -1   94.30    5.50
  -1  -5   1   82.09    5.58
  -1   5   1   84.08    5.66
   1   5  -1   84.30    5.68
  -1   5   1   95.33    5.85
  -1   5   1  103.06    5.65
   0  -5  -1    3.61    2.58
   0  -5   1    4.55    2.60
   0   5   1    6.66    2.21
   0   5  -1    2.82    2.70
   0   5   1    4.07    2.90
   1  -5   1    6.15    2.57
  -1  -5  -1    7.44    2.74
   1   5   1    7.83    2.89
  -1   5  -1    9.00    2.81
   2  -5   1    8.94    2.59
  -2  -5  -1   -0.50    2.36
  -2  -5  -1    8.24    2.90
  -2  -5  -1    8.23    2.62
   2   5   1    1.68    2.32
  -2   5  -1    2.17    2.52
  -2   5  -1    5.89    2.67
   3  -5   1  301.83   10.81
  -3  -5  -1  318.15   11.56
  -3  -5  -1  312.07   11.77
  -3  -5  -1  309.29   11.59
  -3   5  -1  304.11   11.44
  -3   5  -1  317.69   11.54
   3   5   1  313.87   11.01
  -4  -5  -1  474.22   16.40
  -4  -5  -1  473.29   15.46
  -4  -5  -1  460.12   16.04
  -4  -5  -1  459.71   16.23
   4   5   1  475.74   15.02
  -4   5  -1  478.47   16.01
  -4   5  -1  476.20   16.22
  -5  -5  -1  208.31    8.94
  -5  -5  -1  201.02    8.73
  -5  -5  -1  191.60    8.41
  -5  -5  -1  204.13    8.91
  -5   5  -1  202.78   11.26
  -5   5  -1  213.87    8.73
  -5   5  -1  213.46    8.68
  -6  -5  -1    2.66    2.56
  -6  -5  -1    1.02    2.42
  -6  -5  -1    0.61    2.44
  -6  -5  -1   -0.63    2.61
  -6   5  -1    2.67    2.44
  -6   5  -1    3.88    4.33
  -6   5  -1    0.19    2.47
  -7  -5  -1   67.36    6.26
  -7  -5  -1   67.80    5.49
  -7  -5  -1   60.59    5.43
  -7  -5  -1   70.05    5.59
  -7   5  -1   68.60    5.30
  -7   5  -1   66.98    8.57
  -7   5  -1   71.06    5.65
  -8  -5  -1  177.39    8.85
  -8  -5  -1  182.17    9.25
  -8  -5  -1  181.96    9.88
  -8  -5  -1  177.37    8.74
  -8   5  -1  198.53   13.62
  -8   5  -1  159.84    8.23
  -8   5  -1  159.94    8.56
  -9  -5  -1    3.39    3.64
  -9  -5  -1    5.75    3.33
  -9  -5  -1   11.32    4.29
  -9   5  -1   -3.05    3.54
  -9   5  -1    4.11    6.81
 -10  -5  -1    1.20    4.54
 -10  -5  -1    1.46    3.98
 -10   5  -1   -2.83    7.01
 -10   5  -1    0.33    3.74
 -11  -5  -1   42.27    6.45
 -11  -5  -1   45.59    6.20
 -11   5  -1   49.95    5.91
 -11   5  -1   60.85   11.44
 -11  -6   1    1.22    4.73
 -11  -6   1    5.60    5.21
 -11   6   1   12.32    8.52
 -10  -6   1   17.29    4.98
 -10  -6   1   15.41    4.76
 -10   6   1   16.01    4.27
 -10   6   1    2.04    7.35
  -9  -6   1   19.34    4.57
  -9  -6   1   24.22    4.18
  -9  -6   1   17.80    4.26
  -9   6   1   17.85    4.19
  -9   6   1   28.32    8.36
  -8  -6   1   57.94    5.35
  -8  -6   1   53.93    5.33
  -8   6   1   64.43    9.31
  -8   6   1   58.33    5.16
  -8   6   1   63.60    5.21
  -7  -6   1    4.14    2.98
  -7  -6   1   -0.51    2.72
  -7  -6   1    1.37    2.72
  -7   6   1    1.65    2.84
  -7   6   1   -4.27    4.73
  -7   6   1    6.06    2.93
  -7   6   1    5.12    2.88
  -6  -6   1   14.93    3.18
  -6  -6   1   10.94    3.09
  -6  -6   1    8.24    2.93
  -6   6   1    6.33    3.06
  -6   6   1   12.45    3.23
  -6   6   1   15.84    3.19
  -6   6   1    6.69    4.63
  -5  -6   1   -0.64    2.43
  -5  -6   1    2.29    2.04
  -5  -6   1    0.50    2.60
  -5   6   1    1.17    2.45
  -5   6   1    7.50    2.78
  -5   6   1   -2.14    3.54
  -5   6   1    0.57    2.60
  -4  -6   1  534.03   18.41
  -4  -6   1  540.12   18.26
  -4   6   1  529.07   18.32
   4   6  -1  529.20   17.03
  -4   6   1  522.51   20.27
  -4   6   1  556.91   18.29
  -4   6   1  537.74   17.98
   3  -6  -1   76.67    4.80
  -3  -6   1   65.06    5.27
  -3  -6   1   74.53    5.50
  -3   6   1   78.27    5.71
  -3   6   1   84.17    5.40
  -3   6   1   77.06    5.47
  -3   6   1   87.33    6.98
   3   6  -1   68.54    4.90
   2  -6  -1    0.92    2.27
  -2  -6   1    3.14    2.56
  -2  -6   1   -1.62    2.28
  -2   6   1   -1.07    2.60
   2   6  -1   -1.74    2.33
  -2   6   1    3.03    3.06
  -2   6   1   -0.14    2.65
  -2   6   1    1.95    2.50
   1  -6  -1   36.52    4.02
  -1  -6   1   45.63    4.36
  -1   6   1   32.68    4.07
  -1   6   1   49.56    4.80
  -1   6   1   51.91    4.60
   1   6  -1   43.17    4.44
   0  -6  -1   27.57    3.91
   0  -6   1   22.68    3.46
   0   6   1   40.78    3.44
   0   6   1   38.22    4.40
   0   6  -1   30.73    4.08
  -1  -6  -1   73.65    5.75
   1  -6   1   72.16    5.54
  -1   6  -1   84.56    5.95
   1   6   1   75.84    5.81
  -2  -6  -1   59.13    5.19
  -2  -6  -1   57.28    4.88
  -2  -6  -1   52.95    4.77
   2  -6   1   51.30    4.61
   2   6   1   54.66    4.76
  -2   6  -1   58.20    4.83
  -2   6  -1   54.89    4.83
  -3  -6  -1  243.57    9.95
  -3  -6  -1  234.74   10.03
   3  -6   1  228.16    9.26
  -3  -6  -1  239.01    9.93
  -3   6  -1  244.78    9.98
  -3   6  -1  223.91    9.86
   3   6   1  248.05    9.51
  -4  -6  -1   91.08    5.94
  -4  -6  -1  110.81    6.49
  -4  -6  -1  104.75    6.34
   4  -6   1   99.48    4.99
  -4  -6  -1  102.78    4.57
   4   6   1   99.30    5.39
  -4   6  -1   93.95    6.31
  -4   6  -1  102.35    6.25
  -5  -6  -1   43.01    4.57
  -5  -6  -1   43.90    4.66
  -5  -6  -1   40.91    3.69
  -5  -6  -1   50.42    4.83
  -5   6  -1   48.38    4.70
  -5   6  -1   51.89    6.64
  -5   6  -1   40.33    4.21
  -6  -6  -1   50.24    4.92
  -6  -6  -1   57.13    5.31
  -6  -6  -1   55.93    4.92
  -6  -6  -1   55.20    5.32
  -6   6  -1   46.17    7.02
  -6   6  -1   54.09    4.94
  -6   6  -1   56.09    5.06
  -7  -6  -1    5.34    3.38
  -7  -6  -1   13.69    3.64
  -7  -6  -1    9.47    3.22
  -7  -6  -1    5.86    2.92
  -7   6  -1    7.55    3.16
  -7   6  -1    3.35    5.62
  -7   6  -1    3.28    3.11
  -8  -6  -1    1.12    3.17
  -8  -6  -1    8.73    3.50
  -8  -6  -1    3.35    3.69
  -8   6  -1    4.92    3.44
  -8   6  -1    1.06    5.67
  -8   6  -1    1.79    2.77
  -9  -6  -1    7.23    4.25
  -9  -6  -1    4.87    3.60
  -9  -6  -1    6.70    4.36
  -9   6  -1   11.99    4.18
  -9   6  -1   -0.53    6.09
  -9   6  -1   10.06    3.62
 -10  -6  -1    1.32    4.56
 -10  -6  -1    4.93    4.40
 -10   6  -1   -1.38    4.13
 -10   6  -1   -2.86    6.86
 -11  -6  -1   -5.97    5.53
 -11  -6  -1    5.39    4.81
 -11   6  -1   -6.48    7.51
 -11   6  -1    5.81    4.86
 -11  -7   1   11.96    5.31
 -11  -7   1   11.46    5.74
 -11   7   1   18.86    5.15
 -11   7   1    1.91    7.85
 -10  -7   1   13.56    5.34
 -10  -7   1    9.23    5.05
 -10   7   1   11.95    4.91
 -10   7   1   15.77    8.27
  -9  -7   1    4.37    4.06
  -9  -7   1    4.80    3.47
  -9  -7   1    6.30    4.33
  -9   7   1  -11.29    5.84
  -9   7   1   -2.74    3.36
  -9   7   1   -2.61    3.73
  -8  -7   1   21.06    4.56
  -8  -7   1   15.55    4.10
  -8  -7   1    5.71    3.58
  -8   7   1   21.42    7.22
  -8   7   1   15.82    3.89
  -8   7   1   12.72    3.91
  -7  -7   1   20.39    4.08
  -7  -7   1   14.86    3.94
  -7   7   1   24.70    4.08
  -7   7   1   23.33    4.09
  -7   7   1   15.46    6.20
  -6  -7   1   50.19    5.24
  -6  -7   1   39.37    4.62
  -6   7   1   55.08    7.76
  -6   7   1   43.49    4.75
  -6   7   1   53.27    5.13
  -6   7   1   45.59    5.03
  -5  -7   1    3.74    2.80
  -5  -7   1    9.99    3.26
  -5   7   1   10.95    3.49
  -5   7   1   14.12    5.15
  -5   7   1    8.01    3.39
  -5   7   1    9.44    3.29
  -4  -7   1  543.46   18.45
  -4  -7   1  538.78   18.59
   4  -7  -1  513.87   16.85
  -4   7   1  519.79   20.25
  -4   7   1  514.01   18.40
  -4   7   1  533.44   18.23
  -4   7   1  502.59   18.41
   4   7  -1  527.27   17.26
   3  -7  -1    4.30    2.41
  -3  -7   1    5.13    2.92
  -3  -7   1    5.48    2.74
   3   7  -1    4.66    2.60
  -3   7   1    3.23    2.68
  -3   7   1    3.37    2.99
  -3   7   1    4.32    2.94
  -3   7   1    3.42    3.51
  -2  -7   1  165.75    8.29
  -2  -7   1  161.18    8.08
   2  -7  -1  162.73    7.83
   2   7  -1  160.20    7.92
  -2   7   1  166.96    8.53
  -2   7   1  163.49    8.29
  -2   7   1  162.55    8.36
  -2   7   1  159.60    8.09
   1  -7  -1  257.07   10.94
  -1  -7   1  277.25   11.21
  -1   7   1  278.12   10.84
  -1   7   1  269.78   11.52
  -1   7   1  251.56   11.17
   1   7  -1  274.23   11.05
   0  -7  -1  204.17    9.35
   0  -7   1  204.82    9.29
   0   7   1  196.91    8.08
   0   7  -1  196.84    9.35
   0   7   1  205.84    9.45
  -1  -7  -1  110.76    6.95
   1  -7   1  104.79    6.61
  -1   7  -1  104.97    6.97
   1   7   1  105.42    6.86
  -2  -7  -1    2.15    2.52
   2  -7   1    2.84    2.61
  -2  -7  -1    2.10    2.98
  -2  -7  -1    1.24    2.66
   2   7   1    2.60    2.77
  -2   7  -1   -0.43    2.77
  -2   7  -1   -0.51    2.79
   3  -7   1   -0.10    2.33
  -3  -7  -1   -0.65    2.34
  -3  -7  -1   -1.40    2.45
  -3  -7  -1   -1.63    2.55
  -3   7  -1    1.46    2.72
  -3   7  -1    4.04    2.93
   3   7   1    2.43    2.55
  -4  -7  -1    2.64    2.26
  -4  -7  -1    7.11    3.05
   4  -7   1    5.33    2.27
  -4  -7  -1   10.64    3.16
  -4   7  -1    1.93    2.85
  -4   7  -1   -3.56    3.35
   4   7   1    5.58    2.48
  -4   7  -1    6.48    3.11
  -5  -7  -1  121.28    7.71
  -5  -7  -1  125.73    5.62
  -5  -7  -1  122.77    7.31
  -5  -7  -1  121.16    7.64
  -5   7  -1  147.18    7.77
  -5   7  -1  141.61    9.87
  -5   7  -1  144.38    7.93
  -6  -7  -1   62.45    6.03
  -6  -7  -1   64.41    4.81
  -6  -7  -1   70.58    6.25
  -6  -7  -1   61.69    5.79
  -6   7  -1   67.81    5.84
  -6   7  -1   67.25    6.01
  -6   7  -1   73.80    8.51
  -7  -7  -1   21.48    4.26
  -7  -7  -1   22.74    4.52
  -7  -7  -1   20.99    4.40
  -7   7  -1   30.91    4.69
  -7   7  -1   19.05    4.11
  -7   7  -1   17.03    6.54
  -8  -7  -1   40.43    5.60
  -8  -7  -1   49.84    6.06
  -8  -7  -1   45.86    5.65
  -8   7  -1   50.86    5.80
  -8   7  -1   57.31    5.73
  -8   7  -1   56.50    8.90
  -9  -7  -1   40.30    5.93
  -9  -7  -1   43.85    6.31
  -9  -7  -1   45.34    5.72
  -9   7  -1   52.65    5.62
  -9   7  -1   39.28    5.76
  -9   7  -1   41.44    9.38
 -10  -7  -1    2.25    4.38
 -10  -7  -1    7.19    5.32
 -10   7  -1   -2.69    7.06
 -10   7  -1   -2.34    4.39
 -11  -7  -1   -2.36    5.72
 -11  -7  -1    3.64    5.21
 -11   7  -1    3.43    7.79
 -11   7  -1    0.63    4.78
 -11  -8   1   23.03    6.44
 -11  -8   1   18.00    6.24
 -11   8   1   24.16    9.38
 -11   8   1   16.51    5.61
 -10  -8   1   31.94    6.44
 -10  -8   1   32.75    6.17
 -10   8   1   25.03    9.15
 -10   8   1   32.86    5.95
  -9  -8   1  211.51   11.03
  -9  -8   1  222.72   11.83
  -9  -8   1  194.83   11.53
  -9   8   1  198.76   10.95
  -9   8   1  205.22   10.56
  -9   8   1  210.77   15.92
  -8  -8   1   13.09    4.27
  -8  -8   1    9.20    4.52
  -8  -8   1    0.40    3.77
  -8   8   1   10.22    6.60
  -8   8   1    9.99    4.20
  -8   8   1   11.17    3.96
  -7  -8   1   19.20    4.41
  -7  -8   1    7.07    3.86
  -7   8   1    9.71    3.90
  -7   8   1   10.95    5.97
  -7   8   1   19.57    4.23
  -6  -8   1  116.51    7.80
  -6  -8   1  101.56    7.74
  -6   8   1  103.82   10.19
  -6   8   1  110.80    7.43
  -6   8   1  114.94    7.70
  -5  -8   1  291.38   12.18
  -5  -8   1  273.92   11.99
  -5   8   1  280.71   12.03
  -5   8   1  275.01   11.89
  -5   8   1  272.47   12.07
  -5   8   1  272.69   14.09
  -4  -8   1    1.13    3.10
  -4  -8   1    9.93    3.18
   4  -8  -1    3.41    2.33
  -4   8   1    4.87    3.23
  -4   8   1    3.22    2.97
   4   8  -1    3.74    2.55
  -4   8   1    3.77    3.91
  -4   8   1    3.72    3.03
  -3  -8   1   83.63    6.26
  -3  -8   1   91.00    7.12
   3  -8  -1   98.79    6.14
  -3   8   1   98.43    7.51
   3   8  -1  101.79    6.32
  -3   8   1  100.00    6.70
  -3   8   1  105.53    6.89
  -3   8   1   83.37    6.82
   2  -8  -1  327.36   12.49
  -2  -8   1  317.97   12.97
  -2  -8   1  315.29   12.79
  -2   8   1  291.36   12.69
  -2   8   1  310.74   13.01
  -2   8   1  310.30   12.79
  -2   8   1  338.75   12.98
   2   8  -1  310.51   12.51
  -1  -8   1   17.57    3.67
   1  -8  -1   22.45    3.86
  -1   8   1   19.09    3.99
  -1   8   1   28.40    4.03
   1   8  -1   25.59    4.06
  -1   8   1   27.76    4.28
   0  -8  -1   44.54    5.03
   0  -8   1   36.65    4.63
   0   8   1   50.71    5.42
   0   8  -1   49.37    5.32
   0   8   1   47.58    4.17
  -1  -8  -1   -4.22    2.62
   1  -8   1   -3.35    2.54
   1   8   1    0.52    1.80
   1   8   1   -1.18    2.97
  -1   8  -1    3.53    3.19
   2  -8   1  231.57   10.17
  -2  -8  -1  229.07   10.60
   2   8   1  223.58   10.24
  -2   8  -1  226.13   10.61
  -2   8  -1  245.10   10.57
  -3  -8  -1  274.23   12.00
  -3  -8  -1  279.57   11.91
   3  -8   1  294.87   11.62
  -3  -8  -1  286.16   12.31
  -3   8  -1  298.79   12.33
  -3   8  -1  295.14   12.13
   3   8   1  271.56   11.47
  -4  -8  -1    6.80    3.26
  -4  -8  -1    8.23    3.39
  -4  -8  -1    2.54    2.38
   4  -8   1    5.64    2.58
   4   8   1   12.34    3.08
  -4   8  -1   10.49    3.59
  -4   8  -1    5.18    3.30
  -4   8  -1    6.53    4.14
  -5  -8  -1  228.89   10.68
  -5  -8  -1  202.70   10.14
  -5  -8  -1  213.84   10.63
  -5   8  -1  215.21   10.43
  -5   8  -1  217.10   10.54
  -5   8  -1  230.14   12.64
  -6  -8  -1  315.75   13.82
  -6  -8  -1  327.10   14.17
  -6  -8  -1  332.28   14.02
  -6   8  -1  360.02   17.03
  -6   8  -1  353.48   14.22
  -6   8  -1  321.13   13.77
  -7  -8  -1   67.45    6.47
  -7  -8  -1   67.99    7.00
  -7  -8  -1   68.31    6.80
  -7   8  -1   68.11    9.29
  -7   8  -1   68.30    6.59
  -7   8  -1   86.85    7.18
  -8  -8  -1   20.94    5.18
  -8  -8  -1   23.75    4.90
  -8  -8  -1   30.90    5.36
  -8   8  -1   31.13    7.72
  -8   8  -1   19.18    4.93
  -8   8  -1   25.73    4.72
  -9  -8  -1   71.20    7.55
  -9  -8  -1   81.08    8.08
  -9  -8  -1   67.03    7.06
  -9   8  -1   82.11   11.26
  -9   8  -1   79.39    7.76
  -9   8  -1   76.03    7.12
 -10  -8  -1   47.33    7.11
 -10  -8  -1   38.94    6.08
 -10  -8  -1   47.24    6.89
 -10   8  -1   45.83   10.33
 -10   8  -1   32.73    6.06
 -11  -8  -1    9.98    6.42
 -11  -8  -1    2.21    5.49
 -11   8  -1   -2.92    5.25
 -11   8  -1   -4.68    7.02
 -11  -9   1   49.29    8.00
 -11  -9   1   49.26    7.92
 -11   9   1   42.05   10.79
 -11   9   1   63.23    8.05
 -10  -9   1   12.61    6.02
 -10  -9   1   18.75    6.11
 -10   9   1    0.60    7.87
 -10   9   1   14.30    5.51
  -9  -9   1   24.65    5.94
  -9  -9   1   21.01    5.08
  -9  -9   1   22.23    5.54
  -9   9   1   14.12    5.18
  -9   9   1   39.29    9.35
  -9   9   1   24.71    5.33
  -8  -9   1  137.19   10.14
  -8  -9   1  136.95    9.73
  -8  -9   1  140.26    9.75
  -8   9   1  150.12    9.72
  -8   9   1  157.00   14.10
  -8   9   1  139.02    9.31
  -7  -9   1   76.37    7.30
  -7  -9   1   77.87    7.35
  -7  -9   1   67.75    6.74
  -7   9   1   79.93    7.09
  -7   9   1   76.84    6.94
  -7   9   1   71.62    9.90
  -6  -9   1  724.79   25.81
  -6  -9   1  775.52   26.35
  -6   9   1  755.11   26.10
  -6   9   1  690.68   28.68
  -6   9   1  762.51   25.69
  -5  -9   1   78.91    6.99
  -5  -9   1   81.93    6.85
  -5   9   1   80.92    6.93
  -5   9   1   86.10    8.85
  -5   9   1   95.40    7.32
  -4  -9   1   65.59    6.17
  -4  -9   1   73.97    6.76
   4  -9  -1   68.49    5.39
  -4   9   1   80.84    6.66
  -4   9   1   59.41    5.98
  -4   9   1   77.47    6.73
   4   9  -1   69.98    5.73
  -4   9   1   76.60    7.83
  -3  -9   1   46.48    5.46
   3  -9  -1   37.80    4.37
  -3  -9   1   35.72    4.57
  -3   9   1   43.78    5.17
  -3   9   1   38.96    5.49
   3   9  -1   42.28    4.84
  -3   9   1   38.36    5.16
  -3   9   1   38.06    5.07
  -2  -9   1   22.29    4.39
  -2  -9   1   16.62    3.49
   2  -9  -1   31.53    4.34
  -2   9   1   19.21    4.33
  -2   9   1   28.55    4.72
   2   9  -1   30.28    4.41
  -2   9   1   32.49    4.70
  -2   9   1   32.42    4.75
  -1  -9   1   59.80    5.65
   1  -9  -1   49.96    5.43
  -1   9   1   50.61    4.97
  -1   9   1   57.71    5.79
   1   9  -1   64.76    6.05
   0  -9  -1  109.72    7.46
   0  -9   1  118.06    7.57
   0   9   1  101.08    5.83
   0   9  -1  102.13    7.52
   0   9   1   99.46    7.56
   1  -9   1   20.81    4.10
  -1  -9  -1   17.69    4.16
   1   9   1   18.21    2.53
   1   9   1   16.47    4.15
  -1   9  -1   10.09    3.87
  -2  -9  -1    5.15    3.17
  -2  -9  -1    2.86    3.19
   2  -9   1   -1.71    2.72
  -2  -9  -1   -0.13    3.01
  -2   9  -1   -0.75    3.08
   2   9   1    1.81    3.03
  -2   9  -1    1.14    3.18
  -3  -9  -1   63.13    6.47
   3  -9   1   64.88    5.75
  -3  -9  -1   67.07    5.93
  -3  -9  -1   68.44    6.75
  -3   9  -1   62.09    6.53
  -3   9  -1   66.80    6.16
  -3   9  -1   75.80    6.59
   3   9   1   58.79    5.48
  -4  -9  -1   41.47    5.37
   4  -9   1   41.23    4.41
  -4  -9  -1   40.01    5.16
  -4  -9  -1   39.51    5.48
  -4   9  -1   43.92    6.39
  -4   9  -1   51.04    5.55
   4   9   1   43.98    4.70
  -4   9  -1   37.83    5.23
  -5  -9  -1   38.94    5.39
  -5  -9  -1   31.58    4.72
  -5  -9  -1   36.23    5.71
  -5   9  -1   41.35    5.40
  -5   9  -1   37.71    5.19
  -5   9  -1   42.94    6.89
  -6  -9  -1    3.39    3.76
  -6  -9  -1    4.71    2.88
  -6  -9  -1   -0.26    3.72
  -6   9  -1   11.44    5.72
  -6   9  -1    5.44    3.95
  -6   9  -1    0.04    3.63
  -7  -9  -1   37.39    5.73
  -7  -9  -1   36.58    5.67
  -7  -9  -1   37.11    5.28
  -7   9  -1   37.57    5.58
  -7   9  -1   33.96    7.65
  -7   9  -1   40.12    5.86
  -8  -9  -1    6.19    4.40
  -8  -9  -1    2.59    3.86
  -8  -9  -1    5.55    4.24
  -8   9  -1   12.40    6.62
  -8   9  -1   -1.29    4.21
  -8   9  -1    1.92    4.08
  -9  -9  -1    2.10    4.72
  -9  -9  -1   -1.64    3.89
  -9  -9  -1    3.53    5.20
  -9   9  -1    5.46    6.79
  -9   9  -1    2.96    4.25
  -9   9  -1   -3.85    4.43
 -10  -9  -1   12.75    6.02
 -10  -9  -1    6.97    4.82
 -10  -9  -1    6.54    5.47
 -10   9  -1   12.22    8.09
 -10   9  -1   14.00    5.75
 -11  -9  -1   -5.13    5.52
 -11  -9  -1    1.02    6.23
 -11   9  -1   -0.04    8.05
 -11   9  -1    0.68    5.52
 -11 -10   1    1.13    6.08
 -11 -10   1   -2.90    6.27
 -11  10   1   -1.35    5.72
 -11  10   1    5.65    8.30
 -10 -10   1   68.79    8.51
 -10 -10   1   88.20    8.82
 -10 -10   1   66.68    8.66
 -10  10   1   62.71   11.43
 -10  10   1   77.08    8.66
  -9 -10   1   28.70    6.14
  -9 -10   1   10.48    5.52
  -9 -10   1   21.24    5.95
  -9  10   1    9.92    7.45
  -9  10   1    1.98    4.92
  -9  10   1   23.91    5.83
  -8 -10   1    3.55    4.74
  -8 -10   1    0.83    4.38
  -8 -10   1   -0.83    4.37
  -8  10   1    5.30    4.62
  -8  10   1    7.98    6.95
  -8  10   1    7.69    4.87
  -7 -10   1   31.47    5.57
  -7 -10   1   19.02    5.37
  -7 -10   1   28.82    5.91
  -7  10   1   21.98    7.05
  -7  10   1   20.96    5.17
  -7  10   1   25.17    5.43
  -6 -10   1  244.81   12.45
  -6 -10   1  247.10   12.31
  -6 -10   1  223.16   11.75
  -6  10   1  200.18   13.42
  -6  10   1  232.20   11.98
  -6  10   1  225.80   11.86
  -5 -10   1   79.00    7.33
  -5 -10   1   76.43    7.47
  -5  10   1   82.15    7.61
  -5  10   1   95.07    7.83
  -5  10   1   79.36    8.90
  -4 -10   1   78.61    7.21
   4 -10  -1   57.81    5.43
  -4 -10   1   70.49    6.59
  -4  10   1   69.55    7.88
  -4  10   1   75.91    7.01
  -4  10   1   76.50    7.11
   4  10  -1   78.46    6.25
  -3 -10   1   37.67    5.03
   3 -10  -1   35.18    4.63
  -3 -10   1   38.46    5.34
  -3  10   1   27.91    4.83
  -3  10   1   27.33    5.22
  -3  10   1   23.13    4.66
   3  10  -1   25.17    4.41
  -2 -10   1   50.25    6.07
  -2 -10   1   47.05    5.64
   2 -10  -1   39.60    5.29
   2  10  -1   52.86    5.63
  -2  10   1   46.35    5.71
  -2  10   1   53.00    6.10
  -2  10   1   45.02    5.44
   1 -10  -1  167.55    9.27
  -1 -10   1  161.52    9.53
   1  10  -1  163.02    6.98
   1  10  -1  162.94    9.42
  -1  10   1  170.56    9.76
  -1  10   1  169.67    8.48
   0 -10  -1   53.24    5.78
   0 -10   1   53.23    5.81
   0  10   1   62.77    5.04
   0  10  -1   55.99    4.76
   0  10   1   46.48    5.93
   0  10  -1   57.03    6.24
  -1 -10  -1   71.03    6.69
   1 -10   1   51.32    5.64
  -1  10  -1   73.62    7.08
   1  10   1   61.05    4.13
  -1  10  -1   72.20    5.93
   1  10   1   55.82    5.98
  -2 -10  -1   70.36    6.54
  -2 -10  -1   68.06    6.77
   2 -10   1   61.04    6.13
  -2 -10  -1   75.75    7.55
  -2  10  -1   66.45    6.51
   2  10   1   67.57    6.38
  -2  10  -1   69.42    7.01
  -2  10  -1   73.35    6.63
   3 -10   1  120.41    7.61
  -3 -10  -1  100.72    7.24
  -3 -10  -1  101.60    7.85
  -3 -10  -1   99.14    8.04
  -3  10  -1  116.12    8.13
  -3  10  -1  103.17    7.96
   3  10   1  108.81    7.59
  -3  10  -1   97.78    7.89
  -4 -10  -1    7.59    3.30
  -4 -10  -1   14.43    4.32
   4 -10   1   14.47    3.66
  -4 -10  -1   10.04    4.06
  -4  10  -1    8.70    4.68
   4  10   1    2.41    3.13
  -4  10  -1   10.06    4.27
  -4  10  -1   14.36    4.11
  -5 -10  -1    1.77    3.04
  -5 -10  -1    3.00    3.72
  -5 -10  -1    2.67    4.02
  -5  10  -1    9.82    5.12
  -5  10  -1    1.01    3.74
  -5  10  -1    0.20    3.77
  -6 -10  -1   37.34    5.76
  -6 -10  -1   44.25    6.20
  -6 -10  -1   40.24    5.59
  -6  10  -1   42.09    6.19
  -6  10  -1   46.44    6.30
  -6  10  -1   46.90    7.92
  -7 -10  -1    3.56    3.88
  -7 -10  -1   -1.46    4.08
  -7 -10  -1    3.01    4.13
  -7  10  -1  -10.54    5.03
  -7  10  -1    2.71    4.39
  -7  10  -1    5.38    4.36
  -8 -10  -1   13.89    5.03
  -8 -10  -1   11.57    5.17
  -8 -10  -1   10.61    4.55
  -8  10  -1    8.56    4.94
  -8  10  -1   12.86    5.17
  -8  10  -1    4.37    6.56
  -9 -10  -1    5.24    4.64
  -9 -10  -1   -0.17    4.38
  -9 -10  -1   -3.43    5.10
  -9  10  -1   -8.40    6.02
  -9  10  -1    2.08    4.91
  -9  10  -1    5.19    4.88
 -10 -10  -1   10.86    6.33
 -10 -10  -1    3.46    5.98
 -10 -10  -1   11.55    5.53
 -10  10  -1    2.98    7.72
 -10  10  -1    4.11    5.57
 -11 -10  -1   38.39    8.10
 -11 -10  -1   38.73    7.78
 -11  10  -1   37.75    7.47
 -11  10  -1   45.98   11.07
 -10 -11   1    1.71    5.77
 -10 -11   1   -8.37    5.65
 -10 -11   1   11.88    6.04
 -10  11   1   10.02    8.40
 -10  11   1    1.03    6.01
  -9 -11   1   26.86    6.57
  -9 -11   1   29.10    6.55
  -9 -11   1   33.37    6.67
  -9  11   1   36.27    6.77
  -9  11   1   29.31    7.04
  -9  11   1   25.85    9.16
  -8 -11   1  223.10   13.19
  -8 -11   1  218.55   13.26
  -8 -11   1  221.62   12.82
  -8  11   1  205.36   15.36
  -8  11   1  213.75   12.62
  -8  11   1  213.84   12.69
  -7 -11   1  248.56   13.79
  -7 -11   1  257.37   13.29
  -7 -11   1  253.45   13.73
  -7  11   1  257.65   13.45
  -7  11   1  236.00   13.40
  -7  11   1  243.19   15.53
  -6 -11   1   12.42    4.95
  -6 -11   1   14.81    5.23
  -6 -11   1   14.84    4.57
  -6  11   1   18.71    5.25
  -6  11   1   27.90    5.68
  -6  11   1   11.48    6.12
  -5 -11   1   35.45    5.58
  -5 -11   1   53.83    6.66
  -5 -11   1   37.96    5.72
  -5  11   1   40.82    6.20
  -5  11   1   42.39    7.21
  -5  11   1   40.00    6.08
  -4 -11   1    5.35    3.48
  -4 -11   1    4.18    3.61
  -4 -11   1    5.81    3.88
   4  11  -1    6.99    3.46
  -4  11   1    5.56    4.46
  -4  11   1    0.21    3.91
  -4  11   1    5.20    3.92
  -3 -11   1  100.95    8.82
   3 -11  -1   87.60    7.26
  -3 -11   1   90.19    8.00
  -3 -11   1   72.70    6.94
  -3  11   1   85.39    7.92
  -3  11   1   81.27    7.92
  -3  11   1  102.87    8.85
   3  11  -1   84.43    7.30
  -2 -11   1   48.46    6.16
  -2 -11   1   57.68    6.45
   2 -11  -1   42.38    5.55
  -2 -11   1   36.06    4.45
  -2  11   1   35.49    4.89
   2  11  -1   57.02    6.18
  -2  11   1   47.89    6.44
  -2  11   1   40.26    5.51
   1 -11  -1   12.46    3.99
  -1 -11   1    1.49    3.37
   1  11  -1    4.72    3.76
  -1  11   1    3.49    3.73
   1  11  -1    2.77    2.36
  -1  11   1   -0.94    2.99
   0 -11   1  546.86   20.90
   0 -11  -1  554.32   20.89
   0  11   1  559.72   19.24
   0  11   1  572.42   21.09
   0  11  -1  558.94   21.03
   0  11  -1  566.44   19.35
  -1 -11  -1  514.03   20.08
   1 -11   1  542.18   19.92
  -1  11  -1  536.26   19.17
   1  11   1  498.93   19.82
   1  11   1  527.31   17.44
  -1  11  -1  553.00   20.36
  -2 -11  -1    0.09    2.80
  -2 -11  -1    1.88    3.80
   2 -11   1    4.94    3.38
  -2 -11  -1    2.04    3.60
  -2  11  -1    2.21    3.60
   2  11   1    2.59    3.57
  -2  11  -1    4.26    3.80
  -2  11  -1    1.21    3.36
  -3 -11  -1  179.89   10.64
  -3 -11  -1  200.95   10.69
   3 -11   1  162.24    9.58
  -3 -11  -1  191.67   10.57
  -3  11  -1  180.64   10.52
   3  11   1  184.12   10.02
  -3  11  -1  172.67   10.23
  -3  11  -1  179.09   10.54
  -4 -11  -1  204.56   10.98
  -4 -11  -1  197.74   11.27
   4 -11   1  208.55   10.31
  -4 -11  -1  207.37   11.44
   4  11   1  215.55   10.72
  -4  11  -1  209.47   11.46
  -4  11  -1  214.24   11.91
  -4  11  -1  203.81   11.33
  -5 -11  -1    9.68    4.63
  -5 -11  -1   10.08    4.56
  -5 -11  -1    5.21    3.59
  -5  11  -1   17.30    5.11
  -5  11  -1   10.83    5.42
  -5  11  -1   11.36    4.84
  -6 -11  -1    8.05    5.01
  -6 -11  -1    3.27    4.32
  -6 -11  -1   10.53    4.07
  -6  11  -1    6.81    5.90
  -6  11  -1   12.22    4.92
  -6  11  -1    7.47    4.41
  -7 -11  -1  174.94   11.76
  -7 -11  -1  190.67   11.80
  -7 -11  -1  174.12   10.72
  -7  11  -1  158.55   13.27
  -7  11  -1  166.58   11.24
  -7  11  -1  157.20   11.21
  -8 -11  -1  166.64   11.80
  -8 -11  -1  182.28   11.66
  -8 -11  -1  181.21   11.33
  -8  11  -1  149.51   11.16
  -8  11  -1  160.64   11.53
  -8  11  -1  128.58   13.55
  -9 -11  -1   20.23    6.30
  -9 -11  -1   16.42    6.06
  -9 -11  -1   19.48    5.88
  -9  11  -1   17.26    5.87
  -9  11  -1   34.35    6.55
  -9  11  -1   14.05    8.26
 -10 -11  -1   -1.28    4.82
 -10 -11  -1   -0.79    5.28
 -10  11  -1   19.01    8.65
 -10  11  -1   -1.20    5.03
 -10  11  -1    6.16    5.68
 -10 -12   1    4.47    6.19
 -10 -12   1   -4.78    5.02
 -10  12   1    8.88    5.75
 -10  12   1   -2.56    6.03
 -10  12   1    4.43    8.05
  -9 -12   1    7.93    5.36
  -9 -12   1   -0.88    5.13
  -9  12   1   -4.96    6.87
  -9  12   1   -4.26    5.87
  -9  12   1    2.00    5.34
  -8 -12   1   10.94    5.40
  -8 -12   1   -9.96    4.72
  -8  12   1   -4.42    6.64
  -8  12   1    1.75    5.27
  -8  12   1   -2.65    5.07
  -7 -12   1   -6.15    3.97
  -7 -12   1    4.14    4.99
  -7  12   1    5.31    5.24
  -7  12   1   -4.01    4.53
  -7  12   1    6.38    6.54
  -6 -12   1    0.47    4.71
  -6 -12   1    3.87    4.09
  -6  12   1   -1.26    4.64
  -6  12   1    4.94    5.80
  -6  12   1   -0.64    4.92
  -5 -12   1   49.77    6.22
  -5 -12   1   52.00    7.15
  -5  12   1   34.36    6.29
  -5  12   1   55.70    7.06
  -5  12   1   39.34    7.26
  -4 -12   1   69.63    6.96
  -4 -12   1   70.98    8.03
  -4  12   1   73.53    8.43
  -4  12   1   88.24    8.03
  -4  12   1   65.45    7.25
   4  12  -1   73.80    6.88
  -3 -12   1    4.27    2.98
   3 -12  -1    2.96    3.65
  -3 -12   1    5.63    4.24
   3  12  -1   12.66    4.25
  -3  12   1    3.31    4.06
  -3  12   1   -1.33    4.10
   2 -12  -1   32.85    5.34
  -2 -12   1   44.93    6.39
   2  12  -1   41.29    5.80
  -2  12   1   45.05    6.57
  -2  12   1   45.98    5.92
  -1 -12   1   65.44    7.06
   1 -12  -1   74.83    7.56
   1  12  -1   65.52    6.92
  -1  12   1   70.72    6.39
  -1  12   1   68.93    7.57
   1  12  -1   71.02    4.93
   0 -12   1   48.30    6.37
   0 -12  -1   48.34    6.30
   0  12   1   53.35    5.14
   0  12   1   51.56    6.51
   0  12  -1   45.35    6.10
   0  12  -1   49.02    4.97
  -1 -12  -1   -7.14    2.99
   1 -12   1   -3.39    3.01
  -1  12  -1    4.45    4.23
   1  12   1   -0.27    2.27
   1  12   1    2.87    3.83
  -1  12  -1   -0.16    2.95
   2 -12   1  196.57   10.85
  -2 -12  -1  194.81   11.35
   2  12   1  207.16   11.26
  -2  12  -1  196.98   10.65
  -2  12  -1  191.91   11.44
   3 -12   1   38.31    5.53
  -3 -12  -1   42.19    6.29
  -3 -12  -1   42.47    5.83
  -3  12  -1   31.23    5.78
   3  12   1   24.32    5.02
  -3  12  -1   46.84    6.55
  -4 -12  -1   24.61    5.40
  -4 -12  -1   20.80    4.64
  -4  12  -1   26.15    5.65
   4  12   1   24.90    4.85
  -4  12  -1   17.57    5.40
  -5 -12  -1  181.80   11.52
  -5 -12  -1  182.60   10.88
  -5  12  -1  190.43   11.70
  -5  12  -1  169.10   12.04
  -5  12  -1  174.65   11.36
  -6 -12  -1  110.83    9.16
  -6 -12  -1  121.33   10.20
  -6  12  -1  128.53   10.42
  -6  12  -1  100.81   11.14
  -6  12  -1  112.82    9.78
  -7 -12  -1   34.31    6.06
  -7 -12  -1   38.45    6.91
  -7  12  -1   36.01    6.69
  -7  12  -1   34.18    6.74
  -7  12  -1   27.88    7.77
  -8 -12  -1    1.17    4.31
  -8 -12  -1   -6.36    4.44
  -8  12  -1   -4.05    4.73
  -8  12  -1    0.96    5.25
  -8  12  -1   -6.71    6.18
  -9 -12  -1   26.77    6.72
  -9 -12  -1   25.45    6.77
  -9  12  -1   28.89    6.96
  -9  12  -1   34.53    7.03
  -9  12  -1   31.64    9.29
 -10 -12  -1   31.23    7.29
 -10 -12  -1   32.06    7.61
 -10  12  -1   42.02    8.37
 -10  12  -1   39.06   10.34
 -10  12  -1   38.05    7.42
 -10 -13   1    2.19    5.89
 -10 -13   1   -4.72    5.78
 -10  13   1   -0.74    7.92
 -10  13   1    4.95    6.19
  -9 -13   1    9.52    5.72
  -9 -13   1    3.68    6.21
  -9  13   1   12.39    8.30
  -9  13   1    3.77    6.14
  -8 -13   1   25.44    6.81
  -8 -13   1   13.12    5.92
  -8  13   1   25.02    7.12
  -8  13   1   12.51    7.78
  -7 -13   1   -5.11    3.76
  -7 -13   1   -0.12    5.14
  -7  13   1   -1.81    5.27
  -7  13   1   -0.19    6.37
  -6 -13   1   39.45    7.12
  -6 -13   1   28.64    5.83
  -6  13   1   28.93    6.54
  -6  13   1   24.59    7.15
  -5 -13   1    7.14    5.12
  -5  13   1   15.04    5.39
  -5  13   1    6.24    5.87
  -4 -13   1   16.84    5.38
  -4  13   1   10.20    4.94
  -4  13   1   18.69    5.92
   3 -13  -1   24.39    5.17
  -3 -13   1   19.67    5.22
   3  13  -1   18.42    4.87
  -3  13   1   30.72    5.90
  -3  13   1   18.71    5.62
   2 -13  -1   29.48    5.52
  -2 -13   1   38.44    6.21
  -2  13   1   38.07    5.83
   2  13  -1   50.22    6.58
  -2  13   1   34.13    6.12
  -1 -13   1    5.28    4.39
   1 -13  -1    6.55    4.08
   1  13  -1   14.13    4.81
   1  13  -1    5.77    2.84
  -1  13   1    5.78    4.45
  -1  13   1    3.81    3.58
   0 -13   1   33.86    5.99
   0 -13  -1   34.14    5.73
   0  13  -1   35.87    6.29
   0  13  -1   51.20    5.24
   0  13   1   50.88    6.92
   0  13   1   46.16    5.15
   1 -13   1  185.57   11.02
  -1 -13  -1  166.93   11.01
  -1  13  -1  154.30   10.90
  -1  13  -1  179.84    9.64
   1  13   1  171.45   11.03
  -2 -13  -1    8.71    4.45
   2 -13   1    8.89    4.37
  -2  13  -1    7.99    4.46
  -2  13  -1   16.77    5.21
   2  13   1    4.42    4.11
  -3 -13  -1   -2.62    3.70
   3 -13   1   -6.00    3.44
  -3  13  -1    4.22    4.38
  -3  13  -1   -1.47    3.97
   3  13   1    2.98    3.97
  -4 -13  -1   63.86    7.95
  -4  13  -1   79.14    8.91
  -4  13  -1   67.69    7.82
   4  13   1   50.28    7.11
  -5 -13  -1   37.75    6.37
  -5  13  -1   33.55    6.48
  -5  13  -1   34.96    7.41
  -6 -13  -1    5.21    4.78
  -6  13  -1    1.33    5.51
  -6  13  -1   18.82    6.12
  -7 -13  -1    4.50    5.51
  -7 -13  -1   10.10    5.10
  -7  13  -1    1.04    5.66
  -7  13  -1    3.18    6.61
  -8 -13  -1   20.07    6.20
  -8 -13  -1   30.50    7.43
  -8  13  -1   20.26    7.95
  -8  13  -1   16.11    6.70
  -9 -13  -1   40.36    7.79
  -9  13  -1   44.49    8.15
  -9  13  -1   28.70    9.35
 -10 -13  -1    7.27    6.08
 -10  13  -1   10.03    8.29
 -10  13  -1    2.07    6.53
  -9 -14   1   43.41    9.05
  -9  14   1   51.15    8.85
  -9  14   1   27.30    9.19
  -8 -14   1   15.63    7.01
  -8  14   1   19.22    8.32
  -8  14   1    8.50    6.83
  -7 -14   1    3.18    5.67
  -7  14   1    3.47    6.70
  -7  14   1   12.25    6.41
  -6 -14   1   42.69    8.04
  -6  14   1   49.29    8.02
  -6  14   1   54.44    9.00
  -5 -14   1   71.48    8.72
  -5  14   1   62.38    8.33
  -5  14   1   60.48    8.87
  -4 -14   1   21.36    6.11
  -4  14   1   15.26    5.98
  -4  14   1   18.84    5.86
   3 -14  -1   41.43    6.30
  -3 -14   1   36.09    6.79
  -3  14   1   55.06    7.39
   3  14  -1   34.51    6.23
  -3  14   1   47.22    7.18
   2 -14  -1   94.50    9.20
  -2 -14   1   91.70    9.28
  -2  14   1   91.86    8.53
   2  14  -1   84.43    8.69
  -2  14   1   84.65    8.68
   1 -14  -1  229.63   12.75
  -1 -14   1  187.54   12.28
   1  14  -1  209.00   12.41
  -1  14   1  200.00   10.71
  -1  14   1  197.70   12.59
   0 -14  -1   15.63    5.29
   0 -14   1    5.21    4.37
   0  14   1   15.58    3.93
   0  14  -1    9.46    5.18
   0  14  -1   17.59    4.02
   0  14   1   15.06    5.41
   1 -14   1  181.30   11.46
  -1 -14  -1  201.99   12.11
  -1  14  -1  146.92   11.28
  -1  14  -1  188.93   10.24
   1  14   1  195.32   12.19
   2 -14   1  377.03   16.76
  -2 -14  -1  342.00   16.85
  -2  14  -1  371.73   16.24
  -2  14  -1  353.84   16.96
   2  14   1  370.56   16.95
  -3 -14  -1   31.32    6.33
   3 -14   1   52.91    6.99
   3  14   1   44.27    6.64
  -3  14  -1   60.41    7.88
  -3  14  -1   53.12    7.41
  -4 -14  -1   83.95    9.27
  -4  14  -1   77.11    9.04
  -4  14  -1   85.10    9.37
  -5 -14  -1  136.70   11.60
  -5  14  -1  124.64   11.78
  -5  14  -1  137.95   11.62
  -6 -14  -1  143.02   12.40
  -6  14  -1  151.50   13.89
  -6  14  -1  149.53   11.99
  -7 -14  -1   34.97    7.68
  -7  14  -1   43.25    9.24
  -7  14  -1   55.41    8.37
  -8 -14  -1   11.60    6.20
  -8  14  -1   14.30    6.80
  -8  14  -1   30.89    8.58
  -9 -14  -1   68.09    9.30
  -9  14  -1   74.53   10.32
  -9  14  -1   79.26   12.55
  -9 -15   1   -3.10    6.88
  -9  15   1    7.06    7.79
  -9  15   1   -0.75    6.81
  -8 -15   1   12.65    7.24
  -8  15   1   27.14    8.54
  -8  15   1   13.35    7.22
  -7 -15   1   51.87    8.92
  -7  15   1   18.67    8.08
  -7  15   1   51.25    8.92
  -6 -15   1   29.09    7.43
  -6  15   1   52.47    8.65
  -6  15   1   44.88    8.88
  -5 -15   1    3.03    5.01
  -5  15   1   -4.11    5.23
  -5  15   1   -2.20    5.25
  -4 -15   1   95.91    9.97
  -4  15   1   85.58    9.77
  -4  15   1  119.92   11.28
   3 -15  -1  130.81   10.72
  -3 -15   1   96.52   10.12
   3  15  -1  128.57   10.52
  -3  15   1  142.45   10.49
  -3  15   1  119.56   11.17
   2 -15  -1    0.73    4.30
  -2 -15   1    4.94    4.74
   2  15  -1   -1.57    4.49
  -2  15   1    3.11    5.13
  -2  15   1    7.54    4.64
   1 -15  -1    4.62    4.66
  -1 -15   1    2.13    4.68
   1  15  -1   -0.07    4.49
  -1  15   1    4.23    5.13
  -1  15   1    7.05    4.02
   0 -15  -1  233.33   13.73
   0 -15   1  228.36   13.57
   0  15   1  222.98   13.70
   0  15  -1  222.95   13.59
  -1 -15  -1   45.13    7.54
   1 -15   1   64.11    8.34
  -1  15  -1   61.04    8.43
  -1  15  -1   63.91    7.16
   1  15   1   61.45    8.38
   2 -15   1    5.94    4.89
  -2 -15  -1    3.44    4.47
  -2  15  -1   10.83    4.80
   2  15   1    5.69    4.95
  -2  15  -1   13.13    5.42
  -3 -15  -1   68.92    8.90
   3 -15   1   72.76    8.24
  -3  15  -1   74.84    8.65
   3  15   1   75.89    8.43
  -3  15  -1   69.74    8.88
  -4 -15  -1  195.66   13.15
  -4  15  -1  194.98   13.33
  -4  15  -1  205.23   13.55
  -5 -15  -1    8.87    5.55
  -5  15  -1   -0.35    5.15
  -5  15  -1    0.83    5.66
  -6 -15  -1   26.19    7.09
  -6  15  -1   32.56    8.13
  -6  15  -1   37.97    8.08
  -7 -15  -1   63.91    9.82
  -7  15  -1   60.65   10.39
  -7  15  -1   72.90   10.11
  -8 -15  -1   18.65    6.65
  -8  15  -1   14.38    7.13
  -8  15  -1   18.97    8.40
  -9 -15  -1    8.83    6.33
  -9  15  -1    0.00    7.47
  -9  15  -1    1.22    7.17
  -9 -16   1   10.43    7.77
  -9  16   1   13.30    7.66
  -9  16   1   20.71    9.07
  -8 -16   1   -1.84    6.21
  -8  16   1    8.35    6.95
  -8  16   1    6.04    7.18
  -7 -16   1   39.19    8.41
  -7  16   1   29.18    8.05
  -7  16   1   31.41    8.87
  -6 -16   1    4.58    6.17
  -6  16   1    5.79    6.41
  -6  16   1    6.47    6.73
  -5 -16   1    7.55    5.46
  -5  16   1   10.85    6.47
  -5  16   1    2.27    5.67
  -4 -16   1   13.54    6.05
  -4  16   1   22.29    6.81
  -4  16   1   22.01    6.77
  -3 -16   1   32.24    7.06
  -3  16   1   25.47    6.96
  -3  16   1   35.08    6.92
   3  16  -1   16.55    6.05
  -2 -16   1   18.94    6.45
   2 -16  -1   26.72    6.66
  -2  16   1   32.88    6.49
  -2  16   1   37.05    7.16
   2  16  -1   19.83    5.96
  -1 -16   1   -1.10    4.62
   1 -16  -1   -4.65    4.51
   1  16  -1    6.62    5.41
  -1  16   1    2.56    4.17
  -1  16   1    7.16    5.69
   0 -16  -1   15.81    5.93
   0 -16   1   12.76    5.77
   0  16  -1   17.64    6.09
   0  16   1    7.00    5.61
   1 -16   1    9.79    5.46
  -1 -16  -1    0.17    4.42
  -1  16  -1    0.55    4.18
   1  16   1    5.92    5.55
  -1  16  -1   -0.43    5.12
  -2 -16  -1    1.75    5.04
   2 -16   1   -4.94    4.41
  -2  16  -1    8.13    5.43
   2  16   1    9.52    5.49
  -2  16  -1    4.85    4.68
  -3 -16  -1   26.13    6.44
   3 -16   1   28.48    6.56
   3  16   1   31.62    6.65
  -3  16  -1   41.77    7.28
  -3  16  -1   32.44    7.47
  -4 -16  -1    3.05    5.16
  -4  16  -1    4.52    5.12
  -4  16  -1    4.77    5.43
  -5 -16  -1    8.33    5.87
  -5  16  -1    5.67    5.77
  -5  16  -1   13.46    6.48
  -6 -16  -1   19.88    7.10
  -6  16  -1    7.27    6.72
  -6  16  -1   10.51    6.70
  -7 -16  -1   26.97    7.86
  -7  16  -1   33.17    8.54
  -7  16  -1   19.24    7.57
  -8 -16  -1   -7.47    5.21
  -8  16  -1    9.87    7.74
  -8  16  -1    7.56    7.06
  -9 -16  -1    0.52    5.94
  -9  16  -1    2.01    7.34
  -9  16  -1    7.78    8.14
  -8 -17   1   11.98    7.50
  -8  17   1   11.64    8.18
  -8  17   1   14.68    8.07
  -7 -17   1   25.68    8.61
  -7  17   1   29.33    9.03
  -7  17   1   50.03    9.11
  -6 -17   1   18.94    7.02
  -6  17   1    3.37    6.41
  -6  17   1   28.29    8.02
  -5 -17   1   18.64    7.14
  -5  17   1   14.95    6.66
  -5  17   1   13.69    7.31
  -4 -17   1  206.69   15.00
  -4  17   1  200.47   14.61
  -4  17   1  191.37   13.82
  -3 -17   1  186.66   14.02
   3  17  -1  158.26   12.72
  -3  17   1  161.50   12.21
  -3  17   1  165.69   13.92
   2 -17  -1   24.76    6.43
  -2 -17   1   30.04    7.41
  -2  17   1   31.35    7.54
  -2  17   1   34.24    6.77
   2  17  -1   29.92    7.05
  -1 -17   1   37.18    7.60
   1 -17  -1   51.39    8.32
   1  17  -1   49.36    8.36
  -1  17   1   37.62    8.01
   0 -17  -1   39.65    7.67
   0 -17   1   41.91    7.79
   0  17   1   24.16    7.13
   0  17  -1   26.53    7.05
  -1 -17  -1    0.32    5.31
   1 -17   1    2.02    5.18
  -1  17  -1    0.83    5.40
   1  17   1    1.02    5.78
   2 -17   1   54.24    8.05
  -2 -17  -1   35.42    7.83
   2  17   1   19.49    6.56
  -2  17  -1   20.77    7.25
  -2  17  -1   29.70    6.65
  -3 -17  -1   92.71   10.58
  -3  17  -1  111.97   11.56
  -3  17  -1  119.20   11.20
   3  17   1  116.56   10.79
  -4 -17  -1  235.20   15.56
  -4  17  -1  238.52   15.50
  -4  17  -1  233.06   14.93
  -5 -17  -1  108.30   11.93
  -5  17  -1  102.33   11.77
  -5  17  -1   82.87   10.38
  -6 -17  -1    8.72    6.57
  -6  17  -1   11.62    6.83
  -6  17  -1   -1.82    6.08
  -7 -17  -1   70.68    9.86
  -7  17  -1   83.27   11.21
  -7  17  -1   63.60   10.79
  -8 -17  -1   23.22    7.70
  -8  17  -1   34.36    9.55
  -8  17  -1   34.65    9.31
  -8 -18   1    3.49    7.81
  -8  18   1   -4.12    6.78
  -8  18   1    9.03    8.38
  -7 -18   1    3.21    6.71
  -7  18   1   11.39    7.22
  -7  18   1    2.67    6.96
  -6 -18   1   35.71    8.47
  -6  18   1   27.94    8.32
  -6  18   1   17.35    8.06
  -5 -18   1   67.73    9.69
  -5  18   1   35.02    8.38
  -5  18   1   41.15    9.14
  -4 -18   1   -0.69    6.04
  -4  18   1    8.01    6.33
  -4  18   1    1.46    6.11
  -3 -18   1    9.81    6.43
  -3  18   1    1.47    6.21
  -3  18   1    8.46    5.67
  -2 -18   1  213.36   15.76
   2 -18  -1  227.38   15.15
   2  18  -1  217.31   15.23
  -2  18   1  212.39   15.74
  -1 -18   1  148.02   13.90
   1 -18  -1  162.63   14.21
  -1  18   1  137.32   13.07
   1  18  -1  149.91   13.21
   0 -18   1    3.75    5.50
   0 -18  -1    0.91    5.58
   0  18   1    2.65    6.00
   0  18  -1    0.79    6.22
   1 -18   1   14.27    6.58
  -1 -18  -1    1.98    5.78
   1  18   1    4.66    6.02
  -1  18  -1    5.36    6.40
  -2 -18  -1  159.14   14.09
   2 -18   1  169.42   14.56
  -2  18  -1  158.82   13.85
   2  18   1  173.51   13.88
  -3 -18  -1   13.00    7.18
  -3  18  -1   16.55    7.26
  -3  18  -1    0.94    5.66
  -4 -18  -1   69.71    9.85
  -4  18  -1   92.64   10.99
  -4  18  -1   74.02   10.20
  -5 -18  -1   18.12    7.23
  -5  18  -1   24.43    7.80
  -5  18  -1   19.94    7.75
  -6 -18  -1   31.98    9.08
  -6  18  -1   31.63    8.49
  -6  18  -1   21.84    8.12
  -7 -18  -1   -0.55    5.73
  -7  18  -1   10.96    7.30
  -7  18  -1   -4.17    6.64
  -7 -19   1   36.37    9.37
  -7  19   1   36.11    9.83
  -7  19   1   32.74    9.36
  -6 -19   1   -4.05    6.02
  -6  19   1    5.41    7.48
  -6  19   1    7.07    7.13
  -5 -19   1   18.95    7.81
  -5  19   1   39.33    8.77
  -5  19   1   29.43    8.34
  -4 -19   1   -3.84    6.22
  -4  19   1    1.11    6.65
  -4  19   1   -5.94    5.79
  -3 -19   1   -2.48    5.83
  -3  19   1   11.42    7.38
  -2 -19   1   10.03    6.85
   2 -19  -1    4.69    5.95
   2  19  -1    1.38    6.26
  -2  19   1    0.47    6.35
  -1 -19   1    9.08    6.89
   1 -19  -1    4.22    6.02
  -1  19   1    6.97    6.69
   1  19  -1    4.87    6.83
   0 -19  -1   10.33    6.48
   0 -19   1    8.74    6.42
   0  19   1    4.00    6.82
   0  19  -1    3.01    6.64
   1 -19   1   15.10    6.84
  -1 -19  -1   12.69    7.13
  -1  19  -1   15.07    7.32
   1  19   1   13.64    7.23
  -2 -19  -1   25.09    7.65
   2 -19   1   23.16    7.35
  -2  19  -1   30.75    8.63
   2  19   1   21.78    7.37
  -3 -19  -1   -2.12    5.88
  -3  19  -1   -1.81    5.32
  -3  19  -1    0.42    6.14
  -4 -19  -1   -6.31    5.86
  -4  19  -1   18.50    7.86
  -4  19  -1    0.57    6.18
  -5 -19  -1    4.61    6.64
  -5  19  -1    2.47    7.18
  -5  19  -1    9.97    6.85
  -6 -19  -1   -0.94    6.11
  -6  19  -1    7.96    7.43
  -6  19  -1    1.70    7.17
  -7 -19  -1    6.69    7.23
  -7  19  -1   23.90    8.95
  -7  19  -1   19.98    9.15
  -6 -20   1   46.71    9.99
  -6  20   1   56.99   10.63
  -6  20   1   49.24   10.30
  -5 -20   1   10.22    7.63
  -5  20   1   29.08    8.42
  -5  20   1   16.14    8.32
  -4 -20   1   10.24    7.44
  -4  20   1    3.69    7.31
  -4  20   1  -10.24    5.60
  -3 -20   1   67.68   10.65
  -3  20   1   61.25   10.46
  -2 -20   1  100.40   12.70
  -2  20   1   95.48   12.60
   2  20  -1  102.85   12.27
   1 -20  -1   -6.52    5.63
  -1 -20   1    6.43    7.13
   1  20  -1    9.20    7.27
  -1  20   1    6.92    7.67
   0 -20  -1    1.39    6.89
   0 -20   1   -1.98    5.99
   0  20   1    6.96    7.37
   0  20  -1    8.53    7.43
  -1 -20  -1  124.97   13.34
   1 -20   1  152.80   15.12
   1  20   1  132.21   13.58
  -1  20  -1  114.88   13.00
  -2 -20  -1  139.69   15.13
   2  20   1  120.13   12.90
  -2  20  -1  138.50   14.35
  -3 -20  -1   10.67    7.63
  -3  20  -1   23.92    8.32
  -4 -20  -1    4.32    7.24
  -4  20  -1    2.00    7.02
  -4  20  -1    1.11    6.13
  -5 -20  -1   -1.83    6.20
  -5  20  -1   -0.50    6.27
  -5  20  -1    4.29    7.27
  -6 -20  -1   13.25    7.61
  -6  20  -1    1.99    7.81
  -6  20  -1    1.77    6.80
  -5 -21   1    2.91    7.87
  -5  21   1   -2.04    7.46
  -5  21   1    7.74    7.78
  -4 -21   1   50.49   10.32
  -4  21   1   34.49    9.89
  -3 -21   1   54.88   10.39
  -3  21   1   72.46   11.62
  -2 -21   1    2.36    6.76
   2  21  -1   10.57    7.84
  -2  21   1   15.04    8.37
  -1 -21   1    5.85    7.74
   1 -21  -1    4.17    7.11
   1  21  -1    2.43    7.59
  -1  21   1   -9.10    7.04
   0 -21   1  109.15   12.47
   0 -21  -1   91.51   12.79
   0  21  -1  106.90   13.22
   0  21   1   93.20   12.65
   1 -21   1   57.73   10.55
  -1 -21  -1   47.23   10.35
   1  21   1   44.03    9.83
  -1  21  -1   41.28    9.96
  -2 -21  -1    8.01    7.32
   2  21   1    0.34    7.10
  -2  21  -1   -8.62    6.73
  -3 -21  -1    9.43    7.81
  -3  21  -1   17.87    8.45
  -4 -21  -1   26.55    9.24
  -4  21  -1   20.44    8.40
  -5 -21  -1   18.90    8.73
  -5  21  -1   11.48    7.83
  -5  21  -1   14.07    8.05
  -4 -22   1   15.51    9.14
  -4  22   1    4.38    8.38
  -3 -22   1    6.02    8.06
  -3  22   1    7.31    8.98
  -2 -22   1    6.93    8.46
  -2  22   1    0.49    8.09
   1 -22  -1   12.32    7.96
  -1 -22   1   10.47    8.10
   1  22  -1    8.49    8.43
  -1  22   1   15.45    8.75
   0 -22   1    3.67    7.55
   0 -22  -1   -3.22    7.51
   0  22   1    0.43    8.23
   0  22  -1  -10.75    7.20
   1 -22   1   13.36    8.27
  -1 -22  -1   -9.42    6.81
   1  22   1   -6.71    7.23
  -1  22  -1    5.76    8.06
  -2 -22  -1   10.18    8.36
  -2  22  -1    4.38    8.55
  -3 -22  -1   -0.65    7.70
  -3  22  -1   13.75    8.66
  -4 -22  -1   18.93    9.56
  -4  22  -1   -7.58    7.29
  -3 -23   1   19.98    9.98
  -3  23   1   -3.61    8.29
  -2 -23   1    7.60    9.33
  -2  23   1  -12.80    7.86
  -1 -23   1   14.27    9.50
   1  23  -1   13.84    9.22
  -1  23   1   18.02    9.76
   0 -23  -1   94.84   13.67
   0 -23   1   85.35   12.79
   0  23   1   78.52   13.00
   0  23  -1   83.94   12.69
  -1 -23  -1   43.87   11.58
  -1  23  -1   37.39   10.96
   1  23   1   41.53   10.46
  -2 -23  -1    2.18    8.17
  -2  23  -1   16.79    9.84
  -3 -23  -1   14.04   10.09
  -3  23  -1   24.58    9.72
 -12   0   2    2.02    7.45
 -11   0   2   48.77    9.54
 -10   0   2   -0.46    5.49
  -9   0   2   13.26    6.02
  -8   0   2   28.59    6.16
  -7   0   2  339.81   15.71
  -6   0   2  330.58   14.46
  -5   0   2    1.97    3.21
  -4   0   2  211.42    9.79
  -3   0   2  802.32   26.02
  -2   0   2   26.78    3.45
  -2   0   2   26.79    1.99
  -2   0   2   21.04    1.70
  -2   0   2   23.69    1.70
  -1   0   2  196.55    6.86
  -1   0   2  193.06    6.85
  -1   0   2  200.49    6.77
   1   0  -2  203.96    6.69
   0   0  -2  685.53   20.82
   0   0   2  715.21   20.89
  -1   0  -2 8548.92  243.48
   1   0   2 8551.39  242.67
  -2   0  -2  158.08    6.13
   2   0   2  152.34    5.79
  -2   0  -2  145.53    6.03
  -2   0  -2  156.27    6.10
  -3   0  -2  226.23    8.01
  -3   0  -2  223.15    8.04
  -3   0  -2  212.61    7.95
  -4   0  -2  310.47   10.80
  -4   0  -2  317.16   10.82
  -4   0  -2  326.98   10.77
  -5   0  -2 1055.53   32.58
  -5   0  -2 1092.86   31.87
  -5   0  -2 1047.29   32.60
  -6   0  -2   14.78    2.38
  -6   0  -2   14.02    2.37
  -6   0  -2   11.22    2.43
  -7   0  -2    9.00    2.46
  -7   0  -2   11.11    5.04
  -7   0  -2   13.50    2.89
  -7   0  -2   15.04    2.71
  -8   0  -2  106.38    5.89
  -8   0  -2   94.42    5.73
  -8   0  -2   91.38    6.05
  -8   0  -2  101.52    9.93
  -9   0  -2  178.62    8.61
  -9   0  -2  158.83    8.12
  -9   0  -2  173.51   12.77
 -10   0  -2    3.50    5.75
 -10   0  -2    9.48    3.97
 -10   0  -2    8.90    3.49
 -11   0  -2   52.20    8.88
 -12   1   2    8.14    7.69
 -11  -1   2    8.95    6.66
 -11   1   2    6.26    6.88
 -10  -1   2   32.42    7.31
 -10   1   2   17.53    7.44
  -9  -1   2   20.63    6.25
  -9   1   2   19.07    6.59
  -8  -1   2   10.62    5.05
  -8   1   2    7.17    5.44
  -7  -1   2   -1.96    3.82
  -7   1   2   -3.70    4.11
  -6  -1   2   91.97    7.83
  -6   1   2   81.35    7.91
  -5  -1   2  296.69   12.38
  -5   1   2  282.52   12.78
  -4  -1   2   59.91    5.42
  -4   1   2   79.08    6.53
  -3  -1   2   78.67    3.42
  -3  -1   2   70.24    5.22
  -3   1   2   87.58    5.97
  -2  -1   2   42.82    2.62
  -2  -1   2   40.76    2.79
  -2  -1   2   38.29    2.55
  -2  -1   2   46.40    3.86
  -2   1   2   25.36    2.08
  -2   1   2   27.85    2.33
  -2   1   2   34.30    2.79
  -2   1   2   33.49    3.93
  -1  -1   2  203.85    7.31
   1  -1  -2  217.00    7.08
  -1  -1   2  223.13    7.30
  -1  -1   2  205.76    7.31
  -1   1   2  207.44    7.23
   1   1  -2  215.60    7.15
  -1   1   2  212.20    7.33
  -1   1   2  203.56    7.26
   0  -1   2    2.63    1.58
   0  -1  -2    0.51    1.45
   0   1  -2    4.25    1.59
   0   1   2    1.98    1.49
   1  -1   2  836.99   24.62
  -1  -1  -2  805.51   24.67
  -1   1  -2  824.74   24.62
   1   1   2  842.18   24.63
  -2  -1  -2  251.07    8.78
   2  -1   2  242.67    8.31
  -2  -1  -2  246.51    8.72
  -2   1  -2  242.14    8.70
  -2   1  -2  242.83    8.57
   2   1   2  256.95    8.44
  -3  -1  -2  112.31    5.13
  -3  -1  -2  114.51    5.09
  -3  -1  -2  102.62    4.92
  -3   1  -2  105.29    4.99
  -3   1  -2  106.97    4.90
  -4  -1  -2    2.40    1.87
  -4  -1  -2    2.76    1.70
  -4  -1  -2    2.17    1.87
  -4   1  -2    0.48    1.68
  -4   1  -2    0.18    1.75
  -5  -1  -2  145.52    6.19
  -5  -1  -2  136.11    6.03
  -5   1  -2  130.66    5.92
  -5   1  -2  143.55    5.99
  -6  -1  -2  127.65    5.82
  -6  -1  -2  110.70    5.58
  -6  -1  -2  113.50    5.77
  -6   1  -2  120.33    5.65
  -6   1  -2  112.12    5.63
  -7  -1  -2    3.51    4.13
  -7  -1  -2    4.25    2.21
  -7  -1  -2    5.80    2.59
  -7  -1  -2    6.04    2.36
  -7   1  -2    4.03    4.64
  -7   1  -2    1.63    1.99
  -7   1  -2    6.44    2.47
  -8  -1  -2   -1.28    4.23
  -8  -1  -2    1.33    2.37
  -8  -1  -2   -3.91    2.59
  -8  -1  -2    0.39    2.27
  -8   1  -2    3.06    2.28
  -8   1  -2    2.82    2.33
  -8   1  -2   -0.68    4.78
  -8   1  -2    1.36    2.61
  -9  -1  -2   84.93    6.60
  -9  -1  -2   94.26    9.84
  -9  -1  -2   72.00    6.02
  -9   1  -2   75.65    6.24
  -9   1  -2   89.64   10.42
 -10  -1  -2   21.48    4.54
 -10  -1  -2   18.22    6.36
 -10  -1  -2   13.07    3.91
 -10   1  -2   22.75    4.02
 -10   1  -2   11.05    6.41
 -10   1  -2   23.44    4.48
 -11  -1  -2   15.67    4.53
 -11  -1  -2   15.06    4.96
 -11  -1  -2   28.21    7.77
 -11   1  -2   25.34    8.45
 -12   1  -2   -5.54    6.33
 -12   2   2    8.57    8.29
 -11   2   2   39.70   10.05
 -10  -2   2  131.38   11.92
 -10   2   2  114.23   12.67
  -9  -2   2    6.49    5.09
  -9   2   2    4.77    6.06
  -8  -2   2   12.70    5.09
  -8   2   2   30.97    6.82
  -7  -2   2   68.94    7.32
  -7   2   2   67.80    8.05
  -6  -2   2   27.90    4.89
  -6   2   2   14.71    5.03
  -5  -2   2   50.87    5.39
  -5   2   2   40.50    5.59
  -4  -2   2  149.26    5.50
  -4  -2   2  140.54    7.41
  -4  -2   2  147.41    5.48
  -4   2   2  141.18    8.15
  -3  -2   2  175.35    7.67
  -3  -2   2  176.16    6.26
  -3  -2   2  168.08    6.33
  -3  -2   2  162.31    6.20
  -3   2   2  186.97    6.27
  -3   2   2  174.37    8.45
  -2  -2   2  412.69   13.19
  -2  -2   2  408.24   13.37
  -2  -2   2  416.57   13.42
  -2   2   2  434.51   14.84
  -2   2   2  427.50   13.35
  -2   2   2  421.43   13.30
   2   2  -2  397.08   12.79
  -2   2   2  428.62   13.13
  -1  -2   2  252.04    8.94
  -1  -2   2  261.47    8.88
   1  -2  -2  247.17    8.65
  -1   2   2  244.24    8.77
  -1   2   2  252.70    9.49
   1   2  -2  275.25    8.78
  -1   2   2  260.18    8.97
  -1   2   2  256.23    8.98
   0  -2   2  509.76   15.84
   0  -2  -2  505.50   15.90
   0   2  -2  508.08   15.84
   0   2   2  504.67   15.84
   1  -2   2   58.12    3.84
  -1  -2  -2   65.40    4.16
  -1   2  -2   59.01    4.02
   1   2   2   57.87    3.96
  -2  -2  -2  325.10   11.12
  -2  -2  -2  318.47   11.08
  -2  -2  -2  323.38   10.97
   2  -2   2  317.06   10.60
  -2   2  -2  318.71   10.87
   2   2   2  324.94   10.68
  -2   2  -2  315.86   10.99
  -3  -2  -2   52.91    3.93
  -3  -2  -2   58.55    3.88
  -3  -2  -2   54.34    4.11
   3   2   2   49.49    3.27
  -3   2  -2   46.20    3.56
  -3   2  -2   49.18    3.74
  -4  -2  -2  173.20    7.35
  -4  -2  -2  191.22    7.52
  -4  -2  -2  178.96    7.31
  -4   2  -2  184.78    7.24
  -4   2  -2  191.87    7.30
  -5  -2  -2   31.72    3.25
  -5  -2  -2   29.60    3.10
  -5  -2  -2   31.42    3.04
  -5   2  -2   24.51    2.87
  -5   2  -2   26.18    2.89
  -6  -2  -2    5.46    2.38
  -6  -2  -2    4.89    2.25
  -6  -2  -2    6.47    2.31
  -6   2  -2    3.90    2.20
  -6   2  -2    5.40    2.22
  -7  -2  -2   16.71    3.00
  -7  -2  -2   17.95    3.34
  -7  -2  -2   15.64    4.74
  -7   2  -2   20.86    5.90
  -7   2  -2   14.72    2.79
  -7   2  -2   17.54    3.05
  -8  -2  -2    1.27    2.87
  -8  -2  -2    6.19    4.49
  -8  -2  -2    1.68    2.43
  -8  -2  -2    0.84    2.59
  -8   2  -2    7.73    5.66
  -8   2  -2    3.43    2.80
  -8   2  -2    1.84    2.24
  -9  -2  -2    2.10    3.16
  -9  -2  -2    0.83    3.43
  -9  -2  -2    6.44    3.03
  -9  -2  -2    1.41    4.54
  -9   2  -2    3.45    3.13
  -9   2  -2   11.73    6.72
  -9   2  -2    1.72    2.87
 -10  -2  -2    2.67    5.43
 -10  -2  -2   13.39    3.90
 -10  -2  -2   11.71    4.49
 -10   2  -2    2.47    6.88
 -10   2  -2   11.77    3.72
 -10   2  -2   16.43    4.46
 -11  -2  -2   13.19    5.13
 -11  -2  -2    7.31    4.39
 -11   2  -2   -6.50    6.79
 -11   2  -2    6.43    3.89
 -12  -2  -2    1.55    4.60
 -12  -2  -2    8.68    5.36
 -12   2  -2   11.74    7.92
 -12   3   2    4.71    8.07
 -11   3   2   10.15    8.01
 -10  -3   2    6.76    5.40
 -10   3   2    2.74    7.19
  -9  -3   2  121.07   10.25
  -9   3   2   92.73   11.26
  -8  -3   2    8.61    4.45
  -8   3   2   -2.52    5.27
  -7  -3   2    1.37    1.85
  -7  -3   2    3.78    3.93
  -7   3   2    3.80    4.90
  -6  -3   2  210.57    7.56
  -6  -3   2  198.10    9.86
  -6   3   2  179.50   11.03
  -5  -3   2  877.37   28.07
  -5  -3   2  816.65   25.98
  -5  -3   2  909.04   25.64
  -5   3   2  776.95   29.22
  -5   3   2  851.62   25.20
  -4  -3   2  255.09    9.04
  -4  -3   2  272.92   10.44
  -4  -3   2  264.46    9.12
  -4   3   2  257.44    8.86
  -4   3   2  252.18    8.80
  -4   3   2  246.83   11.64
  -4   3   2  261.01    8.77
  -3  -3   2    4.63    2.01
  -3  -3   2    0.58    1.77
  -3   3   2    4.16    2.11
  -3   3   2    2.88    1.70
  -3   3   2    0.39    1.75
  -3   3   2    3.99    3.22
  -2  -3   2  578.29   17.83
   2  -3  -2  546.39   17.00
  -2  -3   2  582.18   17.53
  -2   3   2  540.75   17.74
  -2   3   2  546.02   17.38
  -2   3   2  549.00   17.69
   2   3  -2  586.32   17.22
  -2   3   2  517.73   18.76
  -1  -3   2 9414.94  274.37
  -1  -3   2 9292.62  280.76
  -1   3   2 9760.17  271.90
  -1   3   2 9347.43  280.73
  -1   3   2 9566.60  280.76
   1   3  -2 9999.00  272.95
  -1   3   2 9767.24  280.46
   0  -3   2    1.34    2.10
   0  -3  -2    6.40    2.21
   0   3   2   -2.34    2.08
   0   3  -2    4.13    2.32
  -1  -3  -2   24.58    3.03
   1  -3   2   28.55    3.05
   1   3   2   30.52    3.19
  -1   3  -2   33.00    3.27
  -2  -3  -2  478.44   15.57
  -2  -3  -2  476.22   15.58
  -2  -3  -2  465.56   15.23
   2  -3   2  463.27   14.92
   2   3   2  465.33   14.98
  -2   3  -2  446.71   15.37
  -2   3  -2  447.00   15.14
   3  -3   2  454.87   14.42
  -3  -3  -2  472.33   15.19
  -3  -3  -2  454.87   15.38
  -3  -3  -2  459.47   15.49
   3   3   2  457.59   14.57
  -3   3  -2  452.16   15.29
  -3   3  -2  455.11   15.09
  -4  -3  -2   59.98    4.22
  -4  -3  -2   55.88    4.46
  -4  -3  -2   54.52    4.38
  -4   3  -2   53.04    4.08
  -4   3  -2   59.07    4.31
  -5  -3  -2  125.89    6.27
  -5  -3  -2  133.64    6.49
  -5  -3  -2  125.82    6.20
  -5   3  -2  119.44    6.08
  -5   3  -2  120.00    5.99
  -6  -3  -2  216.91    9.12
  -6  -3  -2  230.20    9.22
  -6  -3  -2  222.59    9.28
  -6  -3  -2  218.67   10.37
  -6   3  -2  213.00    8.85
  -6   3  -2  229.56    8.99
  -7  -3  -2  196.87    8.77
  -7  -3  -2  204.47    8.76
  -7  -3  -2  194.95   10.55
  -7  -3  -2  183.13    8.59
  -7   3  -2  185.27   12.26
  -7   3  -2  193.55    8.60
  -7   3  -2  199.04    8.45
  -8  -3  -2    6.56    3.43
  -8  -3  -2   13.40    4.79
  -8  -3  -2    8.63    3.18
  -8   3  -2    1.15    5.46
  -8   3  -2    9.34    3.19
  -8   3  -2    8.21    2.93
  -9  -3  -2   62.09    5.33
  -9  -3  -2   60.85    5.59
  -9  -3  -2   54.23    7.33
  -9  -3  -2   60.15    5.90
  -9   3  -2   45.70    8.98
  -9   3  -2   47.50    5.32
 -10  -3  -2  121.25    8.97
 -10  -3  -2  122.18    8.48
 -10   3  -2  116.25    8.38
 -10   3  -2  127.56   13.63
 -10   3  -2  124.03    7.91
 -11  -3  -2   38.04    5.79
 -11  -3  -2   36.36    6.44
 -11   3  -2   26.28    5.05
 -11   3  -2   23.60    8.99
 -11   3  -2   36.27    5.54
 -12  -3  -2   -2.15    4.41
 -12  -3  -2  -11.90    5.04
 -12   3  -2   -7.57    7.16
 -12   4   2    7.69    8.93
 -11   4   2   63.03   11.55
 -10   4   2    5.89    7.18
  -9  -4   2   32.30    6.10
  -9   4   2   20.80    7.43
  -8  -4   2   16.42    4.78
  -8  -4   2   22.63    3.24
  -8   4   2   19.91    6.58
  -7  -4   2   43.99    3.97
  -7  -4   2   50.40    5.92
  -7  -4   2   47.16    4.01
  -7   4   2   61.65    8.20
  -7   4   2   55.97    3.97
  -6  -4   2   39.28    4.89
  -6  -4   2   39.50    3.52
  -6  -4   2   43.28    3.69
  -6   4   2   43.82    3.52
  -6   4   2   40.04    6.43
  -5  -4   2   -0.30    2.02
  -5  -4   2    1.50    2.01
  -5  -4   2    3.77    2.64
  -5   4   2    4.74    3.88
  -5   4   2    3.90    2.08
  -5   4   2   -1.29    1.76
  -5   4   2    5.78    2.00
  -4  -4   2   51.74    4.30
  -4  -4   2   50.09    3.86
  -4  -4   2   49.96    3.96
  -4   4   2   37.27    3.25
  -4   4   2   39.67    3.37
  -4   4   2   41.61    5.46
  -4   4   2   44.29    3.64
  -3  -4   2   10.71    2.62
  -3  -4   2   11.42    2.44
  -3   4   2    9.39    2.38
  -3   4   2    9.13    3.66
  -3   4   2    6.93    2.19
  -3   4   2    8.82    2.51
   3   4  -2   10.42    2.10
   2  -4  -2    3.98    2.15
  -2  -4   2    4.99    2.44
  -2  -4   2    1.62    2.00
  -2   4   2    2.54    2.24
  -2   4   2    4.85    3.15
  -2   4   2    7.43    2.59
  -2   4   2    2.57    2.23
   2   4  -2    4.47    2.23
  -1  -4   2   53.05    4.35
  -1  -4   2   50.16    4.20
   1  -4  -2   62.62    4.43
  -1   4   2   53.35    4.47
  -1   4   2   61.40    4.71
  -1   4   2   55.52    4.28
  -1   4   2   61.66    4.82
   1   4  -2   59.05    4.40
   0  -4   2  249.57    9.30
   0  -4  -2  216.47    9.09
   0   4   2  242.86    9.32
   0   4  -2  233.46    9.17
   1  -4   2  182.40    7.66
  -1  -4  -2  167.43    7.65
   1   4   2  172.40    7.71
  -1   4  -2  195.78    7.95
   2  -4   2    4.78    2.31
  -2  -4  -2    4.08    2.44
  -2  -4  -2    9.15    2.66
  -2  -4  -2    3.81    2.29
  -2   4  -2    3.10    2.25
  -2   4  -2    5.09    2.55
   2   4   2    4.84    2.39
   3  -4   2  325.12   11.19
  -3  -4  -2  336.25   12.04
  -3  -4  -2  337.79   12.03
  -3  -4  -2  324.68   12.14
  -3   4  -2  316.13   11.86
  -3   4  -2  326.18   11.85
   3   4   2  333.19   11.38
  -4  -4  -2  303.59   11.37
  -4  -4  -2  306.08   11.42
  -4  -4  -2  304.86   11.46
   4   4   2  296.15   10.45
  -4   4  -2  298.73   11.20
  -4   4  -2  300.43   11.26
  -5  -4  -2  281.36   10.48
  -5  -4  -2  256.37   10.33
  -5  -4  -2  263.20   10.47
  -5   4  -2  242.49   10.05
  -5   4  -2  255.41   10.12
  -6  -4  -2    0.09    2.82
  -6  -4  -2    4.31    2.58
  -6  -4  -2    5.14    2.79
  -6  -4  -2    2.59    2.60
  -6   4  -2    2.72    2.48
  -6   4  -2    9.86    2.73
  -7  -4  -2   11.77    4.05
  -7  -4  -2   16.21    3.70
  -7  -4  -2   10.04    3.09
  -7  -4  -2    8.05    3.02
  -7   4  -2   15.22    3.17
  -7   4  -2   11.46    3.24
  -7   4  -2   13.72    5.61
  -8  -4  -2   80.29    6.43
  -8  -4  -2   90.76    8.21
  -8  -4  -2   85.70    6.29
  -8  -4  -2   84.97    6.51
  -8   4  -2   79.68    6.46
  -8   4  -2   82.05    5.97
  -8   4  -2   89.37   10.44
  -9  -4  -2   56.42    5.94
  -9  -4  -2   59.87    5.97
  -9   4  -2   65.09    6.01
  -9   4  -2   55.97    9.84
  -9   4  -2   65.33    5.57
 -10  -4  -2   11.93    4.25
 -10  -4  -2   -5.36    4.36
 -10   4  -2    7.94    7.61
 -10   4  -2    1.22    3.97
 -11  -4  -2   18.22    5.87
 -11  -4  -2   27.71    5.56
 -11   4  -2   22.30    5.06
 -11   4  -2   19.92    8.98
 -11   4  -2   24.50    5.45
 -12   5   2   -3.79    8.37
 -11   5   2   -5.58    6.75
 -10  -5   2    2.53    3.91
 -10  -5   2    4.23    3.97
 -10   5   2    3.16    7.22
  -9  -5   2   16.49    3.99
  -9   5   2   20.04    7.58
  -8  -5   2  213.16    9.20
  -8  -5   2  207.06   11.36
  -8  -5   2  195.68    9.51
  -8   5   2  226.30    8.95
  -8   5   2  227.34   14.76
  -7  -5   2  201.38    8.73
  -7  -5   2  201.27   10.23
  -7  -5   2  193.82    8.86
  -7   5   2  193.58    8.56
  -7   5   2  200.69    8.46
  -7   5   2  202.42   13.06
  -7   5   2  209.35    8.49
  -6  -5   2   51.93    4.51
  -6  -5   2   59.30    4.80
  -6  -5   2   72.11    5.88
  -6   5   2   58.79    4.80
  -6   5   2   48.36    7.10
  -6   5   2   58.70    4.66
  -6   5   2   59.23    4.65
  -5  -5   2    0.71    2.33
  -5  -5   2    2.52    2.48
  -5   5   2    1.32    2.22
  -5   5   2    0.21    2.18
  -5   5   2    1.23    2.30
  -5   5   2   -2.11    3.64
  -4  -5   2    1.36    2.41
  -4  -5   2    5.46    2.33
  -4   5   2    4.30    2.30
  -4   5   2    4.07    2.57
  -4   5   2    5.79    3.73
  -4   5   2    7.51    2.43
  -3  -5   2   31.24    3.47
  -3  -5   2   26.49    3.53
   3  -5  -2   21.29    2.68
  -3   5   2   23.95    3.44
  -3   5   2   22.35    4.29
  -3   5   2   19.19    3.07
   3   5  -2   26.65    2.96
  -3   5   2   21.99    3.15
   2  -5  -2  551.82   17.63
  -2  -5   2  565.80   18.25
  -2   5   2  516.46   18.29
   2   5  -2  582.01   17.89
  -2   5   2  560.02   18.36
  -2   5   2  517.22   17.89
  -2   5   2  535.09   19.10
  -1  -5   2   92.17    5.76
  -1  -5   2   86.81    5.45
   1  -5  -2   87.04    5.57
  -1   5   2   80.57    5.53
  -1   5   2   77.74    5.79
   1   5  -2   89.68    5.70
   0  -5   2   44.69    4.14
   0  -5  -2   41.99    4.11
   0   5   2   45.55    4.33
   0   5   2   50.53    3.95
   0   5  -2   49.68    4.45
   1  -5   2  102.49    6.11
  -1  -5  -2  111.32    6.39
  -1   5  -2  104.48    6.24
   1   5   2   99.40    6.10
  -2  -5  -2   14.41    3.21
  -2  -5  -2   15.36    3.13
  -2  -5  -2   12.73    2.98
   2  -5   2   14.50    2.96
  -2   5  -2   17.39    3.21
  -2   5  -2   17.90    3.02
   2   5   2   17.43    3.21
  -3  -5  -2   59.18    4.94
  -3  -5  -2   60.75    5.27
  -3  -5  -2   47.51    4.25
   3  -5   2   61.18    4.43
  -3   5  -2   65.86    4.89
   3   5   2   55.58    4.41
  -3   5  -2   59.11    4.83
  -4  -5  -2  165.94    7.87
  -4  -5  -2  159.32    7.95
   4  -5   2  165.95    6.65
  -4  -5  -2  159.09    7.87
   4   5   2  171.97    6.95
  -4   5  -2  168.40    7.74
  -4   5  -2  173.29    7.97
  -5  -5  -2   -1.20    2.41
  -5  -5  -2    3.83    2.41
  -5  -5  -2    2.88    2.76
  -5   5  -2    2.09    2.52
  -5   5  -2   -1.38    2.32
  -6  -5  -2    1.50    2.78
  -6  -5  -2   -0.32    2.52
  -6  -5  -2    3.34    2.80
  -6  -5  -2   -1.04    2.34
  -6   5  -2    5.00    2.74
  -6   5  -2   -1.41    2.52
  -7  -5  -2   -0.38    2.93
  -7  -5  -2    1.47    2.81
  -7  -5  -2    0.94    3.17
  -7  -5  -2    8.85    3.29
  -7   5  -2   -1.61    2.70
  -7   5  -2    5.85    5.45
  -7   5  -2    3.42    2.97
  -8  -5  -2   11.11    3.75
  -8  -5  -2    4.99    3.82
  -8  -5  -2    7.57    3.76
  -8  -5  -2    6.64    3.36
  -8   5  -2   13.61    3.74
  -8   5  -2   14.65    6.28
  -8   5  -2    9.31    3.58
  -9  -5  -2    3.94    3.84
  -9  -5  -2    2.83    4.08
  -9  -5  -2    7.55    3.54
  -9   5  -2   -8.56    5.87
  -9   5  -2   -3.42    2.82
  -9   5  -2    1.80    3.69
 -10  -5  -2    4.36    4.47
 -10  -5  -2    2.96    4.79
 -10   5  -2  -12.04    6.58
 -10   5  -2    5.84    4.31
 -11  -5  -2   15.05    5.09
 -11  -5  -2   -3.90    5.41
 -11   5  -2   15.99    5.05
 -11   5  -2    8.41    8.45
 -11  -6   2   35.98    6.17
 -11  -6   2   42.90    6.34
 -11   6   2   42.87   10.48
 -10  -6   2   14.84    4.73
 -10  -6   2   20.02    4.83
 -10   6   2   19.66    8.95
  -9  -6   2    2.63    2.94
  -9  -6   2    3.71    3.83
  -9   6   2    9.24    7.05
  -9   6   2   -0.24    3.40
  -8  -6   2    6.79    3.60
  -8  -6   2   11.47    3.16
  -8   6   2   11.28    3.55
  -8   6   2    8.61    3.16
  -8   6   2    8.33    3.67
  -8   6   2   11.36    6.60
  -7  -6   2  148.26    8.38
  -7  -6   2  153.11    8.10
  -7  -6   2  143.16    7.85
  -7   6   2  147.05    7.86
  -7   6   2  150.63    7.63
  -7   6   2  153.28    7.76
  -7   6   2  145.65   11.74
  -6  -6   2    8.46    2.91
  -6  -6   2    3.96    2.86
  -6   6   2    6.57    2.93
  -6   6   2   12.72    5.06
  -6   6   2    1.74    2.83
  -6   6   2    2.52    2.80
  -5  -6   2    2.35    2.67
  -5  -6   2    1.91    2.48
  -5   6   2    1.46    3.99
  -5   6   2    1.54    2.65
  -5   6   2    0.28    2.63
  -5   6   2    0.93    2.43
  -4  -6   2  492.20   17.03
  -4  -6   2  461.09   17.00
  -4   6   2  508.59   17.06
  -4   6   2  491.54   17.02
  -4   6   2  504.34   16.86
   4   6  -2  458.91   15.64
  -4   6   2  501.96   19.16
  -3  -6   2 3040.23   92.25
  -3  -6   2 3145.55   89.73
   3   6  -2 3033.33   88.88
  -3   6   2 3047.21   92.13
  -3   6   2 3046.19   92.06
  -3   6   2 3101.96   93.38
  -3   6   2 3106.34   89.44
  -2  -6   2  108.88    6.53
   2  -6  -2  116.84    6.23
  -2  -6   2  105.39    6.22
  -2   6   2  117.76    7.20
  -2   6   2  112.96    6.77
  -2   6   2  119.65    6.73
   2   6  -2   98.38    6.26
  -2   6   2  123.61    6.69
  -1  -6   2  250.53   10.56
   1  -6  -2  258.67   10.33
  -1   6   2  266.20   10.68
  -1   6   2  253.82   10.39
  -1   6   2  247.57   10.59
   1   6  -2  257.25   10.37
   0  -6  -2  140.63    7.48
   0  -6   2  140.74    7.44
   0   6  -2  148.27    7.57
   0   6   2  138.67    6.50
   0   6   2  136.21    7.56
   1  -6   2  123.10    6.82
  -1  -6  -2  118.64    7.09
  -1   6  -2  125.81    7.14
   1   6   2  121.96    6.99
  -2  -6  -2   25.99    3.67
   2  -6   2   24.88    3.56
  -2  -6  -2   23.10    3.83
  -2  -6  -2   22.02    3.50
  -2   6  -2   33.75    4.14
  -2   6  -2   24.70    3.77
   2   6   2   21.57    3.59
  -3  -6  -2   50.98    4.37
  -3  -6  -2   58.43    4.78
  -3  -6  -2   65.49    5.39
   3  -6   2   61.51    4.79
   3   6   2   62.89    5.02
  -3   6  -2   63.75    5.18
  -3   6  -2   68.43    5.50
  -4  -6  -2  469.12   17.18
  -4  -6  -2  472.45   17.26
  -4  -6  -2  475.29   17.07
   4  -6   2  473.11   15.79
  -4   6  -2  497.87   17.09
   4   6   2  490.74   16.20
  -4   6  -2  496.40   17.26
  -5  -6  -2  235.75   10.27
  -5  -6  -2  214.06    8.87
  -5  -6  -2  232.80   10.11
  -5  -6  -2  225.88   10.21
  -5   6  -2  226.09   10.02
  -5   6  -2  238.51   10.21
  -6  -6  -2   11.71    3.57
  -6  -6  -2   21.10    3.40
  -6  -6  -2   18.96    3.60
  -6  -6  -2   25.07    4.08
  -6   6  -2   17.61    3.76
  -6   6  -2   16.89    5.36
  -6   6  -2   20.06    3.95
  -7  -6  -2   30.46    4.28
  -7  -6  -2   15.44    4.21
  -7  -6  -2   16.70    3.80
  -7  -6  -2   18.42    4.03
  -7   6  -2   15.67    3.80
  -7   6  -2   19.31    4.23
  -7   6  -2    8.00    5.97
  -8  -6  -2  189.43    9.99
  -8  -6  -2  187.96    9.91
  -8  -6  -2  186.35   10.39
  -8   6  -2  171.11    9.94
  -8   6  -2  178.98    9.47
  -8   6  -2  203.91   14.21
  -9  -6  -2   32.45    5.61
  -9  -6  -2   30.70    5.03
  -9  -6  -2   39.79    5.89
  -9   6  -2   36.01    5.05
  -9   6  -2   32.29    5.33
  -9   6  -2   25.97    8.31
 -10  -6  -2    1.19    4.36
 -10  -6  -2  -11.32    4.38
 -10   6  -2    3.00    7.89
 -10   6  -2   -0.51    4.23
 -11  -6  -2   25.66    6.23
 -11  -6  -2   10.78    5.93
 -11   6  -2   13.60    5.45
 -11   6  -2   21.24    9.59
 -11  -7   2   -5.51    4.97
 -11  -7   2   10.57    5.70
 -11   7   2    5.15    4.98
 -11   7   2    0.74    8.28
 -10  -7   2   57.05    6.88
 -10  -7   2   61.28    7.02
 -10   7   2   53.07    6.28
 -10   7   2   59.83   10.68
  -9  -7   2  164.13   10.07
  -9  -7   2  162.59    9.12
  -9   7   2  157.95   14.96
  -9   7   2  154.48    9.22
  -8  -7   2   84.61    6.80
  -8  -7   2   76.28    6.63
  -8   7   2   73.18    6.33
  -8   7   2   57.96    9.53
  -8   7   2   75.30    6.36
  -8   7   2   74.84    6.41
  -7  -7   2   40.22    4.98
  -7  -7   2   39.85    4.95
  -7   7   2   39.49    7.54
  -7   7   2   40.09    4.98
  -7   7   2   36.72    4.66
  -7   7   2   39.01    4.72
  -6  -7   2   -0.16    3.07
  -6  -7   2   -0.24    2.90
  -6   7   2    1.15    2.87
  -6   7   2    0.94    3.04
  -6   7   2    4.64    4.90
  -6   7   2    5.16    3.35
  -5  -7   2  128.78    7.61
  -5  -7   2  141.00    7.64
  -5   7   2  115.69    7.45
  -5   7   2  128.31    9.71
  -5   7   2  129.20    7.31
  -5   7   2  129.64    7.60
  -4  -7   2    0.21    2.44
   4  -7  -2    0.33    2.07
  -4  -7   2   -1.87    2.69
   4   7  -2   -0.82    2.08
  -4   7   2    0.36    2.64
  -4   7   2    4.64    3.15
  -4   7   2    1.84    2.81
  -4   7   2    3.68    3.93
   3  -7  -2   91.90    5.79
  -3  -7   2  115.58    6.62
  -3  -7   2  112.24    6.95
  -3   7   2  103.15    6.57
  -3   7   2  101.52    6.70
   3   7  -2  111.76    6.20
  -3   7   2  105.35    6.91
  -3   7   2   97.25    8.00
   2  -7  -2 1451.10   44.10
  -2  -7   2 1371.01   45.47
  -2  -7   2 1438.88   44.61
  -2   7   2 1465.83   44.47
  -2   7   2 1493.70   46.07
   2   7  -2 1455.47   44.18
  -2   7   2 1490.36   45.82
  -2   7   2 1507.09   45.72
  -1  -7   2  167.60    8.33
   1  -7  -2  167.80    8.13
   1   7  -2  158.49    8.29
  -1   7   2  149.15    8.08
  -1   7   2  153.46    8.34
  -1   7   2  162.18    7.80
   0  -7  -2    4.88    3.01
   0  -7   2    3.87    2.87
   0   7   2    6.01    3.49
   0   7   2    9.02    2.86
   0   7  -2    6.67    3.36
   1  -7   2    9.76    3.13
  -1  -7  -2    8.37    3.19
   1   7   2   10.53    3.30
  -1   7  -2    5.68    3.19
  -2  -7  -2  327.24   13.02
  -2  -7  -2  328.42   12.76
   2  -7   2  330.50   12.47
  -2  -7  -2  325.32   12.88
   2   7   2  334.79   12.64
  -2   7  -2  308.13   12.87
  -2   7  -2  297.42   12.60
  -3  -7  -2  239.87   10.65
  -3  -7  -2  233.13   10.34
   3  -7   2  246.70   10.05
  -3  -7  -2  235.91   10.55
  -3   7  -2  246.99   10.58
  -3   7  -2  234.13   10.57
   3   7   2  236.39   10.06
   4  -7   2   37.67    3.82
  -4  -7  -2   33.58    4.52
  -4  -7  -2   40.34    5.25
  -4  -7  -2   34.73    4.54
   4   7   2   32.16    3.85
  -4   7  -2   40.20    4.77
  -4   7  -2   41.00    4.84
  -5  -7  -2   87.20    6.35
  -5  -7  -2   92.25    6.95
  -5  -7  -2   96.10    6.75
  -5  -7  -2   92.73    4.78
  -5   7  -2   97.28    6.72
  -5   7  -2   86.93    6.91
  -6  -7  -2  139.85    8.42
  -6  -7  -2  130.68    6.59
  -6  -7  -2  144.12    8.14
  -6  -7  -2  140.51    8.51
  -6   7  -2  120.75    8.05
  -6   7  -2  127.28    7.98
  -6   7  -2  144.22   10.61
  -7  -7  -2   31.15    5.14
  -7  -7  -2   39.72    5.30
  -7  -7  -2   28.91    5.02
  -7   7  -2   36.90    7.64
  -7   7  -2   47.06    5.47
  -7   7  -2   35.60    5.04
  -8  -7  -2    2.24    3.74
  -8  -7  -2    3.29    3.58
  -8  -7  -2   -6.81    3.66
  -8   7  -2    3.87    3.72
  -8   7  -2    3.37    3.57
  -8   7  -2    6.81    6.13
  -9  -7  -2   -6.63    3.91
  -9  -7  -2    4.04    4.06
  -9  -7  -2    1.36    4.36
  -9   7  -2    3.06    4.47
  -9   7  -2    4.26    3.92
  -9   7  -2   -8.87    5.86
 -10  -7  -2    2.36    3.94
 -10  -7  -2    3.69    4.88
 -10  -7  -2   -4.96    4.91
 -10   7  -2    3.07    4.57
 -10   7  -2    5.06    7.64
 -11  -7  -2    7.58    5.52
 -11  -7  -2   -1.10    5.71
 -11   7  -2    0.50    7.82
 -11   7  -2   -2.43    5.08
 -11  -8   2   -8.43    5.37
 -11  -8   2    0.69    5.55
 -11   8   2    3.05    5.31
 -11   8   2    2.16    7.62
 -10  -8   2   -5.70    4.43
 -10  -8   2    2.52    5.26
 -10   8   2    3.71    7.96
 -10   8   2   -0.27    4.69
  -9  -8   2    3.51    4.54
  -9  -8   2    1.08    3.78
  -9  -8   2    0.64    4.34
  -9   8   2   -2.61    6.36
  -9   8   2    2.18    4.33
  -9   8   2    0.27    3.73
  -8  -8   2   19.57    4.60
  -8  -8   2   13.13    4.70
  -8   8   2    9.62    4.09
  -8   8   2   10.67    6.84
  -8   8   2   15.58    4.57
  -7  -8   2   38.73    5.42
  -7  -8   2   35.87    5.19
  -7   8   2   46.75    5.47
  -7   8   2   53.59    5.75
  -7   8   2   48.10    8.10
  -7   8   2   45.37    5.51
  -6  -8   2  537.95   20.12
  -6  -8   2  553.99   19.95
  -6   8   2  530.71   19.82
  -6   8   2  567.36   19.73
  -6   8   2  551.60   23.10
  -6   8   2  551.19   19.99
  -5  -8   2   15.19    3.83
  -5  -8   2    9.71    3.34
  -5   8   2    9.42    3.43
  -5   8   2    6.00    3.54
  -5   8   2    8.57    3.41
  -5   8   2    6.85    4.67
  -4  -8   2   93.75    6.67
  -4  -8   2   98.10    7.14
  -4   8   2  109.49    7.11
   4   8  -2  102.85    6.03
  -4   8   2  102.58    8.36
  -4   8   2   92.34    7.05
  -4   8   2   93.61    6.72
   3  -8  -2  144.77    7.44
  -3  -8   2  162.08    8.20
  -3  -8   2  164.64    8.48
  -3   8   2  136.29    7.95
   3   8  -2  151.89    7.75
  -3   8   2  137.32    8.91
  -3   8   2  152.16    8.33
  -3   8   2  122.57    8.14
  -2  -8   2   -0.55    2.68
   2  -8  -2   -0.11    2.68
  -2  -8   2    1.39    2.50
  -2   8   2    5.57    3.33
   2   8  -2   -0.44    2.78
  -2   8   2    3.33    3.10
  -2   8   2    0.66    2.55
  -2   8   2    1.81    3.24
  -1  -8   2  561.04   20.13
   1  -8  -2  589.61   20.05
   1   8  -2  570.03   19.98
  -1   8   2  555.49   20.12
  -1   8   2  577.84   19.88
  -1   8   2  594.36   21.27
   0  -8   2  121.96    7.69
   0  -8  -2  111.37    7.44
   0   8   2  122.17    7.86
   0   8   2  126.68    6.39
   0   8  -2  121.85    7.70
   1  -8   2    3.46    2.86
  -1  -8  -2   -0.78    2.75
   1   8   2    4.33    3.15
  -1   8  -2   -1.12    3.01
  -2  -8  -2    2.86    3.17
   2  -8   2    4.38    2.87
  -2  -8  -2    7.45    2.91
  -2  -8  -2    6.39    3.07
   2   8   2    7.91    3.09
  -2   8  -2    7.13    3.21
  -2   8  -2    2.91    3.00
  -3  -8  -2    3.54    3.03
  -3  -8  -2    2.09    2.24
  -3  -8  -2    0.60    3.01
   3  -8   2    1.52    2.69
  -3   8  -2    1.12    2.98
   3   8   2    4.59    2.91
  -3   8  -2    4.50    3.23
   4  -8   2   96.87    6.07
  -4  -8  -2   96.07    6.85
  -4  -8  -2   74.01    6.21
  -4  -8  -2   84.39    7.01
  -4   8  -2   90.89    7.06
   4   8   2   91.08    6.21
  -4   8  -2   98.53    6.92
  -5  -8  -2   88.43    7.26
  -5  -8  -2   83.09    6.80
  -5  -8  -2   74.88    6.27
  -5   8  -2   96.51    7.39
  -5   8  -2   82.74    6.88
  -6  -8  -2   19.54    4.43
  -6  -8  -2   26.86    4.77
  -6  -8  -2   24.48    4.68
  -6   8  -2   19.36    5.97
  -6   8  -2   16.17    4.43
  -6   8  -2   27.43    4.43
  -7  -8  -2    7.46    4.12
  -7  -8  -2    3.79    4.28
  -7  -8  -2   -2.23    3.22
  -7   8  -2    8.65    3.94
  -7   8  -2    7.78    5.85
  -7   8  -2   -4.33    3.67
  -8  -8  -2   28.70    5.57
  -8  -8  -2   16.06    4.77
  -8  -8  -2   14.19    4.81
  -8   8  -2   13.75    4.71
  -8   8  -2   21.10    7.42
  -8   8  -2   23.81    5.01
  -9  -8  -2    5.43    4.91
  -9  -8  -2   -8.98    4.38
  -9  -8  -2    0.77    4.10
  -9   8  -2   12.67    5.12
  -9   8  -2   -8.45    3.41
  -9   8  -2    7.22    6.78
 -10  -8  -2    1.71    5.43
 -10  -8  -2    6.76    5.46
 -10  -8  -2    4.35    4.40
 -10   8  -2    3.82    5.00
 -10   8  -2    3.23    7.49
 -11  -8  -2    1.88    6.21
 -11  -8  -2    1.01    5.77
 -11   8  -2   -0.37    7.73
 -11   8  -2   12.09    6.11
 -11  -9   2   -3.07    5.91
 -11  -9   2    8.85    6.12
 -11   9   2   -0.29    8.57
 -11   9   2    9.87    5.93
 -10  -9   2   41.13    6.93
 -10  -9   2   41.66    7.23
 -10   9   2   37.81    6.90
 -10   9   2   43.50   10.55
  -9  -9   2   71.91    7.54
  -9  -9   2   84.67    8.35
  -9  -9   2  101.80    8.95
  -9   9   2   80.19    7.96
  -9   9   2  108.99    8.56
  -9   9   2   94.32   12.48
  -8  -9   2    5.72    4.56
  -8  -9   2    5.89    4.47
  -8   9   2   13.11    4.58
  -8   9   2   10.05    4.64
  -8   9   2    5.31    6.46
  -7  -9   2   41.43    5.48
  -7  -9   2   23.90    4.95
  -7   9   2   41.24    5.55
  -7   9   2   30.37    5.51
  -7   9   2   21.39    7.13
  -7   9   2   26.93    5.21
  -6  -9   2  311.11   14.15
  -6  -9   2  323.77   14.38
  -6   9   2  328.89   17.07
  -6   9   2  348.57   14.35
  -6   9   2  342.92   14.33
  -6   9   2  330.65   14.34
  -5  -9   2  339.34   14.64
  -5  -9   2  363.71   14.63
  -5   9   2  334.35   14.53
  -5   9   2  352.10   14.51
  -5   9   2  357.36   16.72
  -5   9   2  342.02   14.55
  -4  -9   2   29.68    4.87
  -4  -9   2   33.39    4.94
   4  -9  -2   32.78    3.76
  -4   9   2   31.17    4.98
   4   9  -2   24.75    3.75
  -4   9   2   30.88    4.81
  -4   9   2   27.23    4.83
  -4   9   2   22.45    5.16
   3  -9  -2   44.53    4.86
  -3  -9   2   36.09    5.12
  -3  -9   2   46.54    5.71
  -3   9   2   56.34    6.15
   3   9  -2   49.75    5.15
  -3   9   2   44.06    5.47
  -3   9   2   49.92    5.51
  -3   9   2   46.62    6.13
  -2  -9   2   66.88    6.22
   2  -9  -2   57.92    5.58
  -2  -9   2   59.35    5.94
   2   9  -2   64.43    5.99
  -2   9   2   57.41    6.00
  -2   9   2   59.65    6.12
  -2   9   2   69.28    6.48
  -2   9   2   54.90    5.96
   1  -9  -2  374.64   14.74
  -1  -9   2  373.39   14.94
  -1   9   2  374.45   15.05
  -1   9   2  367.70   14.18
   1   9  -2  369.31   14.78
  -1   9   2  358.96   14.76
   0  -9   2   10.65    3.68
   0  -9  -2   14.42    3.80
   0   9   2    4.29    2.90
   0   9   2    5.95    3.67
   0   9  -2   12.45    3.84
   1  -9   2  117.34    7.79
  -1  -9  -2  125.49    8.12
   1   9   2  134.98    8.26
  -1   9  -2  127.77    8.23
  -2  -9  -2  512.99   18.89
  -2  -9  -2  505.57   18.78
   2  -9   2  485.51   18.00
  -2  -9  -2  500.41   18.57
  -2   9  -2  472.09   18.28
  -2   9  -2  485.10   18.59
   2   9   2  493.16   18.22
  -3  -9  -2  101.97    6.75
  -3  -9  -2   89.94    7.26
   3  -9   2   95.35    6.73
  -3  -9  -2  101.72    7.23
  -3   9  -2   91.33    7.19
   3   9   2   95.18    7.05
  -3   9  -2   96.79    7.43
   4  -9   2    8.75    3.17
  -4  -9  -2    7.89    2.91
  -4  -9  -2    6.04    3.55
  -4  -9  -2    6.11    3.49
  -4   9  -2    6.89    3.71
  -4   9  -2    8.89    3.80
   4   9   2    9.02    3.25
  -5  -9  -2   61.60    5.84
  -5  -9  -2   56.81    6.51
  -5  -9  -2   62.98    6.16
  -5   9  -2   68.13    6.77
  -5   9  -2   76.65    6.89
  -6  -9  -2  153.35    9.68
  -6  -9  -2  149.11    9.23
  -6  -9  -2  142.75    9.49
  -6   9  -2  152.84    9.50
  -6   9  -2  154.50    9.73
  -6   9  -2  153.08   12.81
  -7  -9  -2    5.66    4.56
  -7  -9  -2    1.19    3.92
  -7  -9  -2   -3.83    2.96
  -7   9  -2    0.04    5.42
  -7   9  -2    5.88    4.28
  -7   9  -2    5.78    4.14
  -8  -9  -2   11.16    4.54
  -8  -9  -2    9.63    4.50
  -8  -9  -2    2.70    4.82
  -8   9  -2   14.89    7.06
  -8   9  -2    7.26    4.84
  -8   9  -2    9.39    4.72
  -9  -9  -2   17.92    5.71
  -9  -9  -2   22.31    5.66
  -9  -9  -2   23.83    5.77
  -9   9  -2   28.41    5.46
  -9   9  -2   26.36    6.20
  -9   9  -2   27.20    8.51
 -10  -9  -2   43.75    7.65
 -10  -9  -2   40.78    6.43
 -10  -9  -2   31.60    6.62
 -10   9  -2   33.76    6.88
 -10   9  -2   26.72    8.77
 -11  -9  -2   11.89    6.33
 -11  -9  -2    6.21    6.57
 -11   9  -2   -3.88    5.80
 -11   9  -2  -10.06    7.26
 -11 -10   2   63.15    8.96
 -11 -10   2   56.83    8.62
 -11  10   2   44.17   11.46
 -11  10   2   68.88    8.74
 -10 -10   2   15.22    5.29
 -10 -10   2    5.06    6.18
 -10 -10   2    8.99    6.12
 -10  10   2   13.85    6.05
 -10  10   2    8.44    8.36
  -9 -10   2   15.56    5.73
  -9 -10   2    9.57    5.00
  -9 -10   2    5.70    5.15
  -9  10   2   17.81    7.88
  -9  10   2   12.00    5.86
  -9  10   2   14.14    5.50
  -8 -10   2  189.07   11.69
  -8 -10   2  194.59   11.56
  -8 -10   2  187.69   11.49
  -8  10   2  160.54   11.13
  -8  10   2  146.93   14.77
  -8  10   2  207.98   11.52
  -7 -10   2  105.17    9.07
  -7 -10   2  123.37    9.14
  -7  10   2  125.13    9.40
  -7  10   2  111.64   12.04
  -7  10   2  123.92    9.43
  -6 -10   2    4.76    4.28
  -6 -10   2    3.90    3.53
  -6  10   2    7.98    4.12
  -6  10   2   10.43    5.95
  -6  10   2   11.90    4.77
  -6  10   2   14.43    4.76
  -5 -10   2  107.72    7.99
  -5 -10   2  129.61    9.04
  -5  10   2  119.64    8.51
  -5  10   2  132.36   11.21
  -5  10   2  121.05    8.64
  -5  10   2  115.51    8.85
   4 -10  -2   29.93    4.27
  -4 -10   2   34.89    5.46
  -4 -10   2   36.67    4.83
  -4  10   2   28.77    5.00
  -4  10   2   29.33    5.17
  -4  10   2   38.36    5.72
   4  10  -2   28.82    4.31
  -4  10   2   23.64    5.57
  -3 -10   2  125.77    7.86
   3 -10  -2  126.39    7.80
  -3 -10   2  124.86    8.57
  -3  10   2  125.99    8.52
  -3  10   2  126.18    8.28
   3  10  -2  123.19    7.90
  -3  10   2  140.34    9.18
  -3  10   2  116.69    8.44
   2 -10  -2  183.02    9.54
  -2 -10   2  174.78    9.54
  -2 -10   2  180.82   10.08
   2  10  -2  194.84    9.98
  -2  10   2  179.48    9.78
  -2  10   2  183.51   10.06
  -2  10   2  189.04    9.98
  -2  10   2  178.28   10.08
   1 -10  -2    3.30    3.25
  -1 -10   2    1.22    3.19
  -1  10   2    1.33    3.03
  -1  10   2    6.40    3.59
   1  10  -2   10.10    3.82
  -1  10   2    4.55    3.86
   0 -10  -2  270.92   12.75
   0 -10   2  300.23   12.88
   0  10  -2  273.18   12.71
   0  10   2  270.66   12.70
   0  10   2  283.98   11.21
   1 -10   2  479.54   18.12
  -1 -10  -2  486.67   18.43
   1  10   2  462.15   18.18
  -1  10  -2  487.68   18.38
  -2 -10  -2   57.37    6.48
  -2 -10  -2   40.26    5.14
   2 -10   2   55.23    5.94
  -2 -10  -2   46.73    5.21
  -2  10  -2   61.65    6.44
   2  10   2   53.73    5.95
  -2  10  -2   48.17    5.84
  -3 -10  -2  200.33   10.42
   3 -10   2  205.04   10.17
  -3 -10  -2  202.26   10.89
  -3  10  -2  211.14   10.95
   3  10   2  208.44   10.44
  -3  10  -2  221.10   11.13
  -4 -10  -2  111.47    8.81
  -4 -10  -2  112.12    7.92
   4 -10   2   92.41    7.03
  -4 -10  -2   97.12    7.19
  -4  10  -2  100.81    8.14
  -4  10  -2  105.03    8.20
   4  10   2   98.44    7.28
  -5 -10  -2   53.33    6.53
  -5 -10  -2   61.82    7.13
  -5 -10  -2   71.87    7.25
  -5  10  -2   66.04    7.10
  -5  10  -2   53.51    6.56
  -5  10  -2   56.08    7.67
  -6 -10  -2    6.78    4.32
  -6 -10  -2    2.69    3.39
  -6 -10  -2    4.93    4.42
  -6  10  -2    8.87    4.43
  -6  10  -2   11.33    5.83
  -6  10  -2    1.35    4.23
  -7 -10  -2   12.85    5.04
  -7 -10  -2   14.65    5.44
  -7 -10  -2   16.51    4.93
  -7  10  -2   14.69    6.56
  -7  10  -2   12.46    5.22
  -7  10  -2   25.21    5.94
  -8 -10  -2   51.45    7.13
  -8 -10  -2   57.75    7.73
  -8 -10  -2   51.32    6.69
  -8  10  -2   47.65    6.96
  -8  10  -2   61.47    7.57
  -8  10  -2   47.22    9.40
  -9 -10  -2   28.58    6.26
  -9 -10  -2   23.36    5.98
  -9 -10  -2   31.75    6.94
  -9  10  -2   18.22    8.14
  -9  10  -2   37.08    6.75
  -9  10  -2   23.62    5.92
 -10 -10  -2   12.45    6.19
 -10 -10  -2    8.62    6.54
 -10 -10  -2   14.31    5.49
 -10  10  -2   10.28    6.00
 -10  10  -2   15.55    8.19
 -10  10  -2   10.26    5.35
 -11 -10  -2    4.67    6.24
 -11  10  -2    1.37    8.45
 -11  10  -2    5.77    5.75
 -10 -11   2    7.89    6.43
 -10 -11   2    4.09    6.10
 -10 -11   2    1.88    5.12
 -10  11   2  -10.56    6.61
 -10  11   2    4.67    6.22
  -9 -11   2   21.06    6.70
  -9 -11   2   24.19    6.23
  -9 -11   2   28.52    6.85
  -9  11   2   43.05    7.24
  -9  11   2   28.05    8.87
  -9  11   2   36.25    6.79
  -8 -11   2    2.37    5.14
  -8 -11   2    0.73    4.45
  -8 -11   2    7.70    5.25
  -8  11   2    6.04    6.97
  -8  11   2   -4.66    4.48
  -8  11   2    2.15    5.03
  -7 -11   2   -0.64    3.84
  -7 -11   2    6.54    4.78
  -7  11   2    6.98    5.16
  -7  11   2    4.18    6.11
  -7  11   2    1.66    4.63
  -6 -11   2   -0.07    4.18
  -6 -11   2    2.92    3.81
  -6  11   2    3.87    5.72
  -6  11   2   -3.45    4.05
  -6  11   2    0.34    4.50
  -5 -11   2   79.14    7.85
  -5  11   2   72.59    7.82
  -5  11   2   69.63    7.17
  -5  11   2   63.79    7.48
  -5  11   2   64.51    8.42
  -4 -11   2   46.48    6.40
  -4 -11   2   40.46    5.18
  -4  11   2   52.41    7.43
  -4  11   2   55.19    6.75
   4  11  -2   41.34    5.40
  -4  11   2   54.27    6.59
  -4  11   2   64.49    7.59
  -3 -11   2    2.84    2.66
   3 -11  -2    7.51    3.50
  -3 -11   2    4.37    3.84
  -3  11   2    1.52    3.89
  -3  11   2   -2.92    3.72
   3  11  -2   -0.11    3.19
  -3  11   2   10.73    4.50
  -3  11   2    4.76    3.36
  -2 -11   2   -1.34    3.21
  -2 -11   2    0.01    2.67
   2 -11  -2    6.27    3.38
  -2  11   2    0.53    3.42
  -2  11   2   -3.83    3.62
  -2  11   2   -0.20    3.42
   2  11  -2   -3.03    3.19
  -1 -11   2    6.20    3.73
   1 -11  -2    3.21    3.47
  -1  11   2    3.83    3.84
  -1  11   2   -2.21    3.01
   1  11  -2    6.26    3.93
   0 -11  -2   59.24    6.59
   0 -11   2   78.52    7.42
   0  11   2   64.89    6.83
   0  11   2   69.49    5.48
   0  11  -2   60.21    6.64
   1 -11   2   71.17    6.76
  -1 -11  -2   93.65    8.16
   1  11   2  104.80    8.50
  -1  11  -2   80.67    7.41
  -2 -11  -2   -3.95    3.27
   2 -11   2    3.24    3.43
  -2 -11  -2    1.58    2.42
   2  11   2   -0.15    3.32
  -2  11  -2    4.87    3.79
  -2  11  -2    3.30    4.39
  -3 -11  -2    6.07    3.93
   3 -11   2    6.85    3.42
  -3 -11  -2   -1.05    2.67
  -3  11  -2   -0.73    3.58
  -3  11  -2    1.80    3.56
   3  11   2    4.93    3.60
  -4 -11  -2   30.95    5.10
   4 -11   2   23.58    4.47
  -4 -11  -2   21.00    4.95
  -4 -11  -2   14.23    3.94
  -4  11  -2   28.14    5.75
  -4  11  -2   26.60    5.26
   4  11   2   16.89    4.26
  -4  11  -2   20.95    5.16
  -5 -11  -2   37.80    6.02
  -5 -11  -2   40.44    6.27
  -5 -11  -2   31.06    5.32
  -5  11  -2   41.06    6.46
  -5  11  -2   31.49    6.73
  -5  11  -2   36.22    6.06
  -6 -11  -2  105.79    9.48
  -6 -11  -2   95.83    8.47
  -6 -11  -2  110.74    9.59
  -6  11  -2  104.17   11.00
  -6  11  -2  118.71    9.59
  -6  11  -2  100.71    9.32
  -7 -11  -2    5.77    4.70
  -7 -11  -2    1.02    3.47
  -7 -11  -2    1.23    5.35
  -7  11  -2    5.21    5.21
  -7  11  -2    5.60    5.19
  -7  11  -2   -2.54    5.58
  -8 -11  -2   -3.96    4.01
  -8 -11  -2    0.73    4.72
  -8  11  -2   -2.64    5.86
  -8  11  -2    8.59    5.66
  -8  11  -2    7.55    5.21
  -9 -11  -2    0.16    4.42
  -9 -11  -2    7.84    5.50
  -9  11  -2   -3.21    5.20
  -9  11  -2   18.64    8.41
  -9  11  -2    9.29    5.83
 -10 -11  -2   12.01    5.83
 -10 -11  -2    6.24    5.56
 -10  11  -2   21.37    6.21
 -10  11  -2   32.74    9.74
 -10  11  -2   10.29    6.41
 -10 -12   2   12.38    6.19
 -10 -12   2   -0.20    5.88
 -10  12   2   13.70    6.74
 -10  12   2    6.73    8.27
  -9 -12   2   10.31    5.74
  -9 -12   2  -14.03    4.76
  -9  12   2   -0.94    5.84
  -9  12   2   16.21    8.61
  -9  12   2   13.75    5.89
  -8 -12   2   88.98    9.84
  -8 -12   2   85.53    9.62
  -8  12   2   82.19   11.62
  -8  12   2  110.94    9.96
  -8  12   2   91.55    9.38
  -7 -12   2  200.92   12.16
  -7 -12   2  177.38   12.63
  -7  12   2  177.14   12.58
  -7  12   2  202.62   12.68
  -7  12   2  196.79   14.83
  -6 -12   2   -1.42    4.36
  -6 -12   2   10.43    4.56
  -6  12   2   -1.61    4.66
  -6  12   2    8.37    6.08
  -6  12   2    5.92    5.09
  -5 -12   2   38.63    6.47
  -5 -12   2   27.46    5.68
  -5  12   2   27.05    6.75
  -5  12   2   30.11    5.81
  -5  12   2   30.84    6.25
  -4 -12   2   65.62    7.47
  -4 -12   2   54.63    6.75
   4  12  -2   66.21    6.96
  -4  12   2   52.55    6.74
  -4  12   2   60.63    7.96
  -4  12   2   61.54    7.23
  -3 -12   2   15.88    4.85
  -3 -12   2   18.87    4.29
   3 -12  -2   16.88    4.45
  -3  12   2   23.95    5.26
   3  12  -2   14.65    4.36
  -3  12   2   17.42    5.22
   2 -12  -2  131.67    9.26
  -2 -12   2  143.68   10.00
  -2  12   2  145.89    9.35
   2  12  -2  158.69    9.80
  -2  12   2  151.48   10.26
   1 -12  -2   19.40    4.64
  -1 -12   2   17.57    4.64
  -1  12   2   25.66    5.43
   1  12  -2   27.97    5.24
  -1  12   2   21.32    4.60
   0 -12   2  195.96   11.06
   0 -12  -2  169.88   10.76
   0  12  -2  187.35   11.05
   0  12   2  171.87    8.69
   0  12   2  170.59   10.85
  -1 -12  -2  580.56   22.18
   1 -12   2  576.79   22.00
  -1  12  -2  585.80   22.24
   1  12   2  584.36   22.22
  -2 -12  -2   82.66    7.88
   2 -12   2   80.59    7.52
  -2  12  -2   69.89    7.40
   2  12   2   87.09    8.12
  -3 -12  -2   85.68    8.68
   3 -12   2   99.09    8.32
  -3  12  -2  105.84    8.51
   3  12   2  121.60    8.71
  -3  12  -2  108.92    9.28
  -4 -12  -2  339.73   15.99
  -4 -12  -2  352.26   15.73
   4  12   2  349.58   15.11
  -4  12  -2  334.61   15.74
  -4  12  -2  345.59   16.34
  -5 -12  -2   -0.59    3.07
  -5 -12  -2    3.90    4.22
  -5  12  -2    4.24    4.60
  -5  12  -2    1.11    5.01
  -6 -12  -2   24.91    6.06
  -6 -12  -2   21.77    5.11
  -6  12  -2   13.18    6.32
  -6  12  -2   24.60    6.18
  -7 -12  -2  102.92    9.69
  -7 -12  -2  100.07    9.24
  -7  12  -2  115.35   12.42
  -7  12  -2  104.27   10.02
  -8 -12  -2   79.63    8.58
  -8 -12  -2  101.22   10.07
  -8  12  -2  107.98   10.05
  -8  12  -2   90.22   11.83
  -9 -12  -2    6.22    5.52
  -9 -12  -2    1.97    5.31
  -9  12  -2    2.19    5.57
  -9  12  -2   -3.01    7.05
 -10 -12  -2   18.13    6.44
 -10 -12  -2   16.80    6.57
 -10  12  -2   18.47    6.45
 -10  12  -2   17.47    8.79
 -10 -13   2   -3.25    5.60
 -10 -13   2    4.40    6.09
 -10  13   2    1.93    6.08
 -10  13   2   -4.18    7.45
  -9 -13   2   22.51    6.74
  -9 -13   2    9.13    6.81
  -9  13   2   19.39    6.98
  -9  13   2   21.19    9.10
  -8 -13   2   -3.40    5.34
  -8 -13   2    4.61    4.94
  -8  13   2    6.45    5.98
  -8  13   2    0.26    7.08
  -7 -13   2   10.58    4.80
  -7 -13   2    5.90    5.92
  -7  13   2    5.46    5.62
  -7  13   2   15.49    7.45
  -6 -13   2   43.06    7.35
  -6 -13   2   45.09    6.75
  -6  13   2   24.84    7.33
  -6  13   2   45.80    7.38
  -5 -13   2  115.08   10.41
  -5  13   2  110.67   11.37
  -5  13   2  111.22   10.03
  -4 -13   2   25.70    6.11
  -4  13   2   21.70    5.99
  -4  13   2   26.90    6.09
   3 -13  -2   17.03    4.78
  -3 -13   2   17.57    5.07
   3  13  -2    0.20    3.85
  -3  13   2    5.81    4.49
  -3  13   2   11.30    4.70
  -2 -13   2   16.35    4.86
   2 -13  -2   17.94    4.66
  -2  13   2   16.39    5.06
  -2  13   2    9.15    4.71
   2  13  -2    8.48    4.30
  -1 -13   2   77.25    8.44
   1 -13  -2   64.28    7.44
  -1  13   2   81.75    7.30
   1  13  -2   59.56    7.11
   1  13  -2   71.08    5.29
  -1  13   2   56.39    7.57
   0 -13   2  112.86    9.76
   0 -13  -2  112.53    9.86
   0  13  -2  109.32    7.07
   0  13   2  111.27    7.24
   0  13   2  113.75    9.63
   0  13  -2  110.63    9.68
  -1 -13  -2   86.12    8.23
   1 -13   2   88.29    8.28
  -1  13  -2   99.42    7.39
   1  13   2   90.75    8.94
  -1  13  -2  112.34    9.52
  -2 -13  -2  454.30   19.53
   2 -13   2  484.62   19.23
  -2  13  -2  484.79   18.86
   2  13   2  454.72   19.13
  -2  13  -2  454.00   19.60
   3 -13   2  699.70   24.59
  -3 -13  -2  644.02   25.14
  -3  13  -2  641.09   24.93
  -3  13  -2  639.78   25.07
   3  13   2  672.88   24.62
  -4 -13  -2  118.91   10.37
  -4  13  -2  110.27   10.07
  -4  13  -2  100.32    9.69
   4  13   2   96.37    8.86
  -5 -13  -2   22.86    5.91
  -5  13  -2   10.08    5.38
  -5  13  -2   10.42    5.72
  -6 -13  -2  217.08   13.02
  -6  13  -2  190.54   13.92
  -6  13  -2  175.87   12.70
  -7 -13  -2   50.68    7.75
  -7  13  -2   55.95    8.04
  -7  13  -2   57.70    9.77
  -8 -13  -2   -0.48    5.07
  -8  13  -2   -9.37    6.03
  -8  13  -2   13.03    6.19
  -9 -13  -2   29.25    7.06
  -9  13  -2   31.85    9.31
  -9  13  -2   17.29    6.63
 -10 -13  -2   52.42    8.85
 -10  13  -2   72.53    9.58
 -10  13  -2   42.25   10.90
  -9 -14   2   23.60    7.65
  -9  14   2   12.38    8.22
  -9  14   2   19.41    7.62
  -8 -14   2   -2.24    5.80
  -8  14   2   -0.62    6.80
  -8  14   2    0.49    5.93
  -7 -14   2   23.61    6.97
  -7  14   2   29.56    8.63
  -7  14   2   24.41    6.92
  -6 -14   2    1.45    5.24
  -6  14   2   -0.45    5.25
  -6  14   2    1.85    5.94
  -5 -14   2   10.31    5.42
  -5  14   2   10.58    6.22
  -5  14   2    9.66    5.49
  -4 -14   2   -1.33    4.47
  -4  14   2    0.23    4.87
  -4  14   2    3.16    5.09
   3 -14  -2    8.98    4.63
  -3 -14   2    4.58    4.79
  -3  14   2   19.50    5.72
  -3  14   2    8.75    5.14
   3  14  -2    9.80    4.93
   2 -14  -2   12.01    4.80
  -2 -14   2   12.07    5.18
  -2  14   2   12.31    5.57
  -2  14   2   12.59    4.91
   2  14  -2   12.57    5.08
   1 -14  -2   12.89    5.02
  -1 -14   2   16.66    5.34
  -1  14   2   14.43    4.61
   1  14  -2   13.27    5.41
  -1  14   2   18.12    5.68
   0 -14  -2    7.71    4.44
   0 -14   2    2.70    4.17
   0  14  -2    6.34    4.82
   0  14  -2   -1.62    3.32
   0  14   2    1.15    3.31
   0  14   2   -5.18    4.45
   1 -14   2   21.09    5.12
  -1 -14  -2   25.81    5.53
   1  14   2   21.18    5.82
  -1  14  -2   20.67    4.59
  -1  14  -2   21.28    5.61
  -2 -14  -2   63.84    8.04
   2 -14   2   48.50    6.72
  -2  14  -2   61.16    7.12
  -2  14  -2   46.71    7.13
   2  14   2   61.90    7.55
  -3 -14  -2   76.11    8.48
   3 -14   2   75.01    8.35
  -3  14  -2   78.27    8.60
  -3  14  -2   72.47    8.70
   3  14   2   79.09    8.24
  -4 -14  -2  173.34   11.99
  -4  14  -2  187.93   12.57
  -4  14  -2  165.59   11.86
  -5 -14  -2    1.13    4.57
  -5  14  -2    9.13    5.97
  -5  14  -2    4.61    5.24
  -6 -14  -2   15.74    5.74
  -6  14  -2   18.20    6.50
  -6  14  -2   18.86    6.97
  -7 -14  -2   -6.42    4.65
  -7  14  -2    5.99    6.78
  -7  14  -2   -1.42    5.58
  -8 -14  -2    7.25    5.70
  -8  14  -2   10.76    6.69
  -8  14  -2    8.86    7.40
  -9 -14  -2   -3.64    5.47
  -9  14  -2   10.81    8.14
  -9  14  -2    7.11    6.82
  -9 -15   2   50.62    9.63
  -9  15   2   55.04   11.51
  -9  15   2   39.56    9.21
  -8 -15   2   -1.84    6.42
  -8  15   2    7.61    7.03
  -8  15   2   -0.72    6.99
  -7 -15   2   -8.84    5.06
  -7  15   2   -3.14    5.72
  -7  15   2    1.11    6.60
  -6 -15   2   -1.93    5.22
  -6  15   2    1.47    5.76
  -6  15   2    2.35    6.47
  -5 -15   2   17.19    6.13
  -5  15   2   29.96    7.57
  -5  15   2   15.59    6.26
  -4 -15   2    4.50    5.30
  -4  15   2    5.65    5.11
  -4  15   2    4.93    5.55
   3 -15  -2   23.31    5.95
  -3 -15   2   14.84    5.77
   3  15  -2   23.61    5.84
  -3  15   2   21.01    6.33
  -3  15   2   19.89    6.02
   2 -15  -2   48.08    7.17
  -2 -15   2   33.47    6.85
  -2  15   2   50.16    7.08
   2  15  -2   52.36    7.61
  -2  15   2   48.86    7.73
  -1 -15   2   85.94    9.61
   1 -15  -2   54.49    7.78
  -1  15   2   74.72    8.94
  -1  15   2   73.18    7.40
   1  15  -2   90.03    9.33
   0 -15   2   30.30    6.74
   0 -15  -2   40.99    7.19
   0  15  -2   43.15    7.34
   0  15   2   45.22    7.53
  -1 -15  -2   -5.28    4.32
   1 -15   2    5.83    4.87
  -1  15  -2    3.57    3.89
  -1  15  -2    5.75    5.01
   1  15   2    3.13    5.04
   2 -15   2   19.95    5.36
  -2 -15  -2   15.74    5.77
   2  15   2   23.97    6.15
  -2  15  -2   25.19    6.37
  -2  15  -2   28.21    5.77
  -3 -15  -2   21.02    6.41
   3 -15   2   23.77    5.80
  -3  15  -2   23.88    6.42
   3  15   2   23.68    5.96
  -3  15  -2   27.24    6.20
  -4 -15  -2   53.89    7.69
  -4  15  -2   73.60    9.17
  -4  15  -2   50.11    7.84
  -5 -15  -2  118.26   10.98
  -5  15  -2  112.62   11.07
  -5  15  -2  123.44   11.85
  -6 -15  -2  123.47   11.46
  -6  15  -2  141.70   12.81
  -6  15  -2  129.71   12.82
  -7 -15  -2   13.62    6.16
  -7  15  -2    7.31    6.53
  -7  15  -2   15.08    7.71
  -8 -15  -2   35.79    7.70
  -8  15  -2   32.63    8.38
  -8  15  -2   16.51    8.29
  -9 -15  -2   32.33    7.89
  -9  15  -2   30.51    8.04
  -9  15  -2   14.95    8.55
  -9 -16   2    2.51    7.28
  -9  16   2    9.09    8.38
  -9  16   2   27.72    9.06
  -8 -16   2   15.62    7.77
  -8  16   2    4.96    7.55
  -8  16   2    6.03    7.15
  -7 -16   2   44.16    8.91
  -7  16   2   31.11    8.24
  -7  16   2   32.41    9.01
  -6 -16   2   18.42    6.89
  -6  16   2   19.08    7.01
  -6  16   2    8.14    7.15
  -5 -16   2    2.99    5.54
  -5  16   2   15.79    6.74
  -5  16   2    8.72    6.60
  -4 -16   2  112.77   11.65
  -4  16   2   97.29   10.68
  -4  16   2   96.40   10.89
  -3 -16   2  159.77   12.85
  -3  16   2  145.31   11.58
  -3  16   2  131.26   11.89
   3  16  -2  175.87   12.35
  -2 -16   2   47.07    7.63
   2 -16  -2   79.33    9.09
  -2  16   2   56.24    8.73
  -2  16   2   78.59    8.70
   2  16  -2   67.24    8.59
  -1 -16   2   14.73    6.02
   1 -16  -2    9.51    5.53
  -1  16   2   14.03    6.26
   1  16  -2   14.58    5.85
  -1  16   2   11.93    4.87
   0 -16  -2  283.40   15.71
   0 -16   2  267.16   15.50
   0  16  -2  264.67   15.66
   0  16   2  303.26   16.17
  -1 -16  -2   88.81    9.31
   1 -16   2   90.61    9.15
  -1  16  -2   88.38    9.99
  -1  16  -2  108.03    9.09
   1  16   2   97.17   10.15
  -2 -16  -2   10.04    5.74
   2 -16   2   17.17    5.80
  -2  16  -2   12.57    5.83
  -2  16  -2    7.54    5.21
   2  16   2   10.09    5.51
   3 -16   2    8.25    5.24
  -3 -16  -2    0.47    4.88
  -3  16  -2   -2.01    5.09
   3  16   2    7.11    5.25
  -3  16  -2   11.37    5.38
  -4 -16  -2  157.11   13.64
  -4  16  -2  172.33   12.91
  -4  16  -2  167.77   12.82
  -5 -16  -2  113.39   11.54
  -5  16  -2  107.39   11.50
  -5  16  -2  122.00   11.81
  -6 -16  -2    3.47    5.05
  -6  16  -2    1.27    6.34
  -6  16  -2    0.71    6.07
  -7 -16  -2   52.15    9.22
  -7  16  -2   48.62    9.03
  -7  16  -2   66.24   10.70
  -8 -16  -2   54.18    9.16
  -8  16  -2   49.26    9.56
  -8  16  -2   43.28    9.81
  -8 -17   2   11.49    7.64
  -8  17   2    8.50    7.73
  -8  17   2    8.42    7.97
  -7 -17   2   -5.91    6.60
  -7  17   2   -1.30    6.97
  -7  17   2   -5.38    6.49
  -6 -17   2   23.34    7.84
  -6  17   2    5.04    6.55
  -6  17   2    8.65    7.38
  -5 -17   2   17.83    6.92
  -5  17   2    8.69    6.69
  -5  17   2    8.26    7.07
  -4 -17   2   -4.08    5.32
  -4  17   2  -12.95    5.09
  -4  17   2    1.29    5.72
  -3 -17   2   12.86    6.37
  -3  17   2    9.63    6.55
   3  17  -2    2.35    5.67
  -3  17   2    2.57    5.33
   2 -17  -2   -4.02    4.20
  -2 -17   2    0.63    5.23
  -2  17   2    2.29    5.25
  -2  17   2    0.89    5.86
   2  17  -2    8.94    5.61
   1 -17  -2    2.03    5.54
  -1 -17   2   -0.73    5.20
   1  17  -2    5.38    5.87
  -1  17   2    3.32    6.01
   0 -17   2    8.92    5.81
   0 -17  -2   -2.43    5.25
   0  17  -2   11.70    6.15
   0  17   2    2.70    5.95
  -1 -17  -2    5.72    5.83
   1 -17   2   -3.01    5.00
   1  17   2   12.59    6.47
  -1  17  -2    1.73    6.06
  -2 -17  -2   11.59    5.88
   2 -17   2   17.84    6.46
   2  17   2   10.67    6.12
  -2  17  -2   28.22    7.25
  -2  17  -2   24.27    6.44
  -3 -17  -2   -6.06    4.63
  -3  17  -2   -1.72    5.27
  -3  17  -2    1.36    5.04
   3  17   2    4.42    5.40
  -4 -17  -2    3.96    5.34
  -4  17  -2    3.01    5.84
  -4  17  -2    1.55    5.61
  -5 -17  -2   -2.87    4.83
  -5  17  -2    3.57    6.06
  -5  17  -2   -5.96    5.77
  -6 -17  -2    6.22    5.99
  -6  17  -2    9.71    6.90
  -6  17  -2    4.97    6.74
  -7 -17  -2    1.28    5.33
  -7  17  -2   -2.12    6.34
  -7  17  -2   -5.99    6.54
  -8 -17  -2    1.80    6.11
  -8  17  -2   -3.50    6.80
  -8  17  -2    0.58    7.32
  -8  18   2   48.20   10.96
  -7 -18   2   31.09    8.70
  -7  18   2   22.30    8.03
  -7  18   2   16.49    8.24
  -6 -18   2   -6.79    6.07
  -6  18   2   -1.18    6.43
  -6  18   2   -5.56    6.43
  -5 -18   2   14.41    6.92
  -5  18   2   17.82    7.68
  -5  18   2   16.73    7.42
  -4 -18   2   61.79    9.60
  -4  18   2   56.71    9.46
  -4  18   2   58.29    9.54
  -3 -18   2   69.80   10.06
  -3  18   2   89.54   10.80
  -3  18   2   83.77   10.03
   2 -18  -2   27.67    7.14
  -2 -18   2   14.84    6.90
   2  18  -2   30.02    7.56
  -2  18   2   18.41    7.44
  -1 -18   2   35.33    7.77
   1 -18  -2   33.92    7.29
   1  18  -2   38.42    8.24
  -1  18   2   21.78    7.57
   0 -18   2   24.52    7.46
   0 -18  -2   25.27    7.19
   0  18   2   20.45    7.09
   0  18  -2   29.89    7.62
   1 -18   2    7.02    6.07
  -1 -18  -2    3.08    5.98
   1  18   2    6.32    6.26
  -1  18  -2   -6.43    5.66
   2 -18   2   -2.27    4.74
  -2 -18  -2    1.71    5.76
   2  18   2    9.85    6.18
  -2  18  -2   -5.40    5.80
  -3 -18  -2  124.74   13.12
  -3  18  -2  119.92   11.74
  -3  18  -2  102.66   12.09
  -4 -18  -2    2.50    5.58
  -4  18  -2    2.42    6.11
  -4  18  -2   -5.85    5.65
  -5 -18  -2    6.84    6.19
  -5  18  -2   -7.93    5.45
  -5  18  -2    5.70    6.25
  -6 -18  -2    4.16    6.20
  -6  18  -2    7.89    7.05
  -6  18  -2   -0.23    6.53
  -7 -18  -2   30.23    8.01
  -7  18  -2   30.35    8.54
  -7  18  -2   39.55    9.52
  -7 -19   2   34.52    9.32
  -7  19   2   12.85    8.14
  -7  19   2   33.79    9.16
  -6 -19   2   11.15    7.49
  -6  19   2   16.66    8.28
  -6  19   2   12.12    7.88
  -5 -19   2   26.18    8.86
  -5  19   2   50.86    9.66
  -5  19   2   32.91    8.66
  -4 -19   2   -1.30    6.57
  -4  19   2   -4.92    6.01
  -4  19   2    2.03    6.78
  -3 -19   2   35.61    8.74
  -3  19   2   48.04    9.42
   2 -19  -2  241.14   16.27
  -2 -19   2  238.39   17.22
   2  19  -2  214.81   16.06
  -2  19   2  233.90   17.20
  -1 -19   2   28.64    8.26
   1 -19  -2   -1.31    5.58
  -1  19   2   13.64    7.04
   1  19  -2    7.13    7.12
   0 -19  -2   -0.74    5.99
   0 -19   2    7.88    6.54
   0  19  -2   -8.19    5.85
   0  19   2   -6.79    6.24
  -1 -19  -2    8.65    6.71
   1 -19   2    1.50    5.96
   1  19   2   -0.05    6.02
  -1  19  -2    1.40    6.44
  -2 -19  -2  135.09   13.31
   2 -19   2  142.87   12.82
   2  19   2  145.64   13.39
  -2  19  -2  130.10   13.34
  -3 -19  -2   53.42   10.27
  -3  19  -2   65.60    9.51
  -3  19  -2   67.26   10.41
  -4 -19  -2   -1.21    5.95
  -4  19  -2   -1.00    6.69
  -4  19  -2   -0.44    5.98
  -5 -19  -2   25.81    8.52
  -5  19  -2   21.71    7.58
  -5  19  -2   22.25    8.17
  -6 -19  -2   44.06    9.38
  -6  19  -2   51.16   10.27
  -6  19  -2   52.35   10.19
  -7 -19  -2   50.59    9.95
  -7  19  -2   55.50   10.75
  -7  19  -2   60.23   11.37
  -6 -20   2    2.56    7.36
  -6  20   2   -0.93    7.70
  -6  20   2    6.33    7.73
  -5 -20   2    5.53    7.60
  -5  20   2    7.89    7.81
  -5  20   2    6.38    7.19
  -4 -20   2   24.02    8.58
  -4  20   2    9.95    7.81
  -4  20   2   25.57    8.68
  -3 -20   2   23.01    8.58
  -3  20   2   13.91    7.80
  -2 -20   2   -1.54    6.57
   2  20  -2    6.46    6.77
  -2  20   2    7.66    7.70
   1 -20  -2   -3.39    6.06
  -1 -20   2   -4.25    6.24
   1  20  -2    2.62    6.90
  -1  20   2    0.79    7.20
   0 -20  -2    2.32    6.71
   0 -20   2   -1.55    5.83
   0  20   2   -0.86    7.10
   0  20  -2    4.82    6.96
  -1 -20  -2    3.52    7.20
   1 -20   2    2.20    6.69
  -1  20  -2    4.62    7.16
   1  20   2   -3.02    6.45
  -2 -20  -2    0.79    6.72
   2  20   2    0.27    6.68
  -2  20  -2    8.85    7.36
  -3 -20  -2   -5.63    6.70
  -3  20  -2   23.68    8.45
  -4 -20  -2   27.02    8.44
  -4  20  -2   18.75    7.73
  -4  20  -2   30.79    8.93
  -5 -20  -2   19.77    8.72
  -5  20  -2   22.41    7.96
  -5  20  -2    6.74    7.29
  -6 -20  -2    1.02    7.04
  -6  20  -2   -1.54    6.55
  -6  20  -2  -11.70    6.82
  -5 -21   2   12.39    8.45
  -5  21   2   11.56    8.25
  -5  21   2   -3.09    7.29
  -4 -21   2   12.20    8.06
  -4  21   2    8.09    7.95
  -3 -21   2   28.98    9.76
  -3  21   2   18.85    8.80
  -2 -21   2   23.31    8.37
  -2  21   2   15.80    8.64
  -1 -21   2   29.00    9.16
   1 -21  -2    5.94    7.66
  -1  21   2   13.73    8.99
   1  21  -2    8.30    7.99
   0 -21   2   -4.35    6.80
   0 -21  -2    1.29    6.93
   0  21  -2   -2.48    7.13
   0  21   2    3.54    7.43
   1 -21   2   10.86    7.30
  -1 -21  -2   18.49    8.98
  -1  21  -2   24.85    8.93
   1  21   2   18.48    8.37
  -2 -21  -2   57.83   10.30
  -2  21  -2   37.36    9.59
   2  21   2   35.89    9.39
  -3 -21  -2   35.85   10.00
  -3  21  -2   37.04    9.81
  -4 -21  -2    1.32    7.35
  -4  21  -2   12.73    8.46
  -5 -21  -2    6.52    8.26
  -5  21  -2   -4.30    6.58
  -5  21  -2   10.94    8.40
  -4 -22   2   85.63   14.09
  -4  22   2   56.85   11.64
  -3 -22   2   56.08   11.44
  -3  22   2   42.97   10.93
  -2 -22   2   30.23   10.29
  -2  22   2    3.91    8.23
   1 -22  -2   -0.13    7.93
  -1 -22   2    0.17    7.84
  -1  22   2    7.79    8.51
   1  22  -2   11.74    8.42
   0 -22  -2  167.95   16.31
   0 -22   2  218.62   18.46
   0  22   2  198.79   17.65
   0  22  -2  180.07   16.59
   1 -22   2   55.69   10.56
  -1 -22  -2   39.35   10.73
   1  22   2   42.46   10.55
  -1  22  -2   53.53   10.84
  -2 -22  -2   10.64    8.25
  -2  22  -2    6.39    8.48
  -3 -22  -2   23.24    9.20
  -3  22  -2   14.30    9.10
  -4 -22  -2   56.93   11.90
  -4  22  -2   44.43   10.90
  -2 -23   2   -5.55    8.39
  -2  23   2    9.47    9.44
  -1 -23   2    1.48    8.17
  -1  23   2   12.15    9.01
   1  23  -2   -3.69    8.19
   0 -23   2   16.99    9.32
   0 -23  -2  -13.39    7.26
   0  23   2   -1.73    8.35
   0  23  -2    0.16    8.26
  -1 -23  -2    1.82    7.87
  -1  23  -2   16.44    9.44
   1  23   2    5.31    8.63
  -2 -23  -2    4.95    9.14
  -2  23  -2   21.31    9.46
 -12   0   3   -6.17    6.60
 -11   0   3    1.58    6.75
 -10   0   3    0.24    5.88
  -9   0   3   -0.85    5.40
  -8   0   3    0.60    4.79
  -7   0   3   -3.41    3.93
  -6   0   3    7.30    4.22
  -5   0   3    2.64    3.52
  -4   0   3    1.04    1.28
  -4   0   3   -0.14    3.09
  -4   0   3   -0.71    1.38
  -3   0   3    4.59    1.63
  -3   0   3    4.73    3.01
  -3   0   3    2.23    1.53
  -3   0   3   -0.55    1.69
  -2   0   3    0.72    1.75
  -2   0   3   -0.88    1.75
   2   0  -3    4.53    1.73
  -2   0   3    1.32    1.68
  -1   0   3   -1.19    1.90
  -1   0   3    0.23    1.76
   1   0  -3    0.57    1.78
  -1   0   3    0.38    1.78
   0   0  -3    0.60    1.86
   0   0   3    1.15    1.86
   1   0   3    1.89    2.08
  -1   0  -3   -2.78    1.91
  -2   0  -3   -2.09    1.95
  -2   0  -3    0.37    1.98
   2   0   3    3.30    2.06
  -2   0  -3   -0.31    2.03
   3   0   3    1.32    1.77
  -3   0  -3   -0.78    1.85
  -3   0  -3    1.54    2.11
  -3   0  -3    0.67    2.09
  -4   0  -3    4.33    2.20
  -4   0  -3   -1.19    1.89
  -4   0  -3    2.26    1.99
  -5   0  -3   -2.70    2.00
  -5   0  -3   -0.80    2.04
  -5   0  -3    0.07    2.01
  -6   0  -3    3.48    2.27
  -6   0  -3   -0.15    2.18
  -6   0  -3    2.12    2.29
  -7   0  -3   -0.54    2.39
  -7   0  -3   -1.31    2.46
  -7   0  -3   -0.01    2.28
  -8   0  -3   -2.66    2.50
  -8   0  -3    2.11    4.79
  -8   0  -3   -2.16    2.56
  -8   0  -3    3.12    3.15
  -9   0  -3   -2.45    2.60
  -9   0  -3    4.44    3.69
  -9   0  -3   -5.48    4.95
  -9   0  -3   -0.24    3.12
 -10   0  -3    0.71    3.63
 -10   0  -3   -1.65    5.97
 -10   0  -3   -1.54    4.17
 -11   0  -3   -1.83    5.83
 -11   0  -3    2.11    4.79
 -11   0  -3    4.33    4.39
 -12   0  -3    1.65    5.28
 -12   0  -3    1.74    4.79
 -12   1   3    7.87    7.99
 -11  -1   3   16.56    7.76
 -11   1   3   28.93    9.10
 -10  -1   3  113.81   11.66
 -10   1   3  109.50   12.30
  -9  -1   3   16.21    6.20
  -9   1   3   19.81    6.89
  -8  -1   3  118.99   10.38
  -8   1   3  124.71   11.26
  -7  -1   3  278.06   13.85
  -7   1   3  273.21   14.26
  -6  -1   3    3.70    3.78
  -6   1   3   13.69    4.80
  -5  -1   3  231.88   10.76
  -5   1   3  221.02   11.25
  -4  -1   3  213.54    7.22
  -4  -1   3  197.14    9.50
  -4   1   3  200.06    7.02
  -4   1   3  200.75    6.96
  -4   1   3  200.27    9.98
  -3  -1   3  188.32    7.02
  -3  -1   3  180.45    8.67
  -3  -1   3  176.36    6.84
  -3  -1   3  176.84    6.88
  -3   1   3  198.58    6.87
  -3   1   3  194.67    6.89
  -3   1   3  196.75    9.07
  -3   1   3  204.51    7.00
   2  -1  -3 1017.09   29.24
  -2  -1   3  964.14   30.37
  -2  -1   3 1018.10   30.42
  -2  -1   3  958.05   29.56
  -2   1   3  971.98   31.50
   2   1  -3  998.89   29.29
  -2   1   3 1018.45   30.39
  -2   1   3 1025.15   29.58
  -2   1   3 1004.47   30.38
   1  -1  -3  213.35    7.81
  -1  -1   3  216.56    8.10
  -1  -1   3  211.19    8.06
  -1  -1   3  205.46    7.97
   1   1  -3  227.06    7.98
  -1   1   3  213.76    8.04
  -1   1   3  216.08    8.00
  -1   1   3  216.08    8.09
   0  -1   3    2.98    2.10
   0  -1  -3    1.25    1.97
   0   1  -3    2.70    2.07
   0   1   3    0.89    2.01
   1  -1   3  190.87    7.63
  -1  -1  -3  201.32    7.84
  -1   1  -3  199.09    7.71
   1   1   3  189.60    7.72
  -2  -1  -3   58.70    4.37
  -2  -1  -3   59.35    4.28
  -2  -1  -3   56.12    4.04
   2  -1   3   65.26    4.31
   2   1   3   56.58    4.14
  -2   1  -3   60.25    4.35
  -2   1  -3   55.78    4.26
  -2   1  -3   64.80    4.30
  -3  -1  -3    4.68    2.05
  -3  -1  -3    5.82    2.32
   3  -1   3    4.31    1.90
  -3  -1  -3    3.36    2.30
  -3   1  -3    3.37    2.18
  -3   1  -3    0.96    2.04
   3   1   3    4.38    2.00
  -3   1  -3    6.90    2.18
  -4  -1  -3  453.81   15.79
  -4  -1  -3  478.55   15.90
  -4  -1  -3  459.79   15.56
  -4   1  -3  475.69   15.86
  -4   1  -3  467.72   15.54
  -5  -1  -3  640.45   20.77
  -5  -1  -3  644.48   21.19
  -5  -1  -3  631.22   21.17
  -5   1  -3  657.81   20.76
  -5   1  -3  626.58   21.11
  -5   1  -3  674.76   21.23
  -6  -1  -3   16.58    2.97
  -6  -1  -3   21.63    3.34
  -6  -1  -3   17.11    3.04
  -6   1  -3   20.82    3.17
  -6   1  -3   13.82    2.96
  -6   1  -3   23.22    3.21
  -7  -1  -3    4.57    2.85
  -7  -1  -3    7.18    2.75
  -7  -1  -3    5.14    2.83
  -7   1  -3    6.55    2.90
  -7   1  -3    7.32    2.69
  -7   1  -3    4.29    2.62
  -8  -1  -3   43.09    4.62
  -8  -1  -3   36.93    4.85
  -8  -1  -3   46.78    7.15
  -8  -1  -3   44.91    4.71
  -8   1  -3   44.18    4.62
  -8   1  -3   45.51    7.75
  -8   1  -3   40.13    4.74
  -8   1  -3   41.68    4.57
  -9  -1  -3  162.93    9.04
  -9  -1  -3  180.21    9.32
  -9  -1  -3  170.88    8.67
  -9  -1  -3  157.45   12.27
  -9   1  -3  158.12    8.89
  -9   1  -3  174.63    8.55
  -9   1  -3  177.22   13.47
  -9   1  -3  167.73    9.20
 -10  -1  -3   46.17    5.81
 -10  -1  -3   42.61    6.02
 -10  -1  -3   39.31    8.01
 -10   1  -3   41.41    5.35
 -10   1  -3   44.96    8.69
 -10   1  -3   53.83    6.22
 -11  -1  -3   48.27    6.56
 -11  -1  -3   47.61    6.29
 -11  -1  -3   28.58    7.84
 -11   1  -3   37.76    6.10
 -11   1  -3   41.18    5.88
 -11   1  -3   44.98    9.37
 -12  -1  -3   18.72    5.68
 -12  -1  -3   15.41    6.01
 -12   1  -3   29.66    9.17
 -12   1  -3   28.85    5.84
 -12   1  -3   17.10    6.05
 -12   2   3   54.63   10.95
 -11   2   3   27.26    8.97
 -10  -2   3    4.39    5.72
 -10   2   3    4.85    6.98
  -9  -2   3   27.05    6.54
  -9   2   3   23.07    7.49
  -8  -2   3   -0.13    4.16
  -8   2   3    1.59    5.19
  -7  -2   3    3.24    3.96
  -7   2   3    4.74    5.02
  -6  -2   3  301.57   13.44
  -6   2   3  310.83   14.62
  -5  -2   3  688.33   20.56
  -5  -2   3  661.93   23.43
  -5  -2   3  676.64   20.78
  -5   2   3  665.87   24.37
  -5   2   3  668.95   20.24
  -4  -2   3    5.67    3.05
  -4  -2   3    3.31    1.69
  -4  -2   3    0.66    1.77
  -4  -2   3    3.30    1.69
  -4   2   3    2.29    1.67
  -4   2   3    1.17    1.47
  -4   2   3    3.81    1.91
  -4   2   3    6.56    3.63
  -3  -2   3   35.23    3.04
  -3  -2   3   31.61    2.90
  -3  -2   3   27.38    2.75
  -3   2   3   30.47    2.69
  -3   2   3   27.37    4.46
  -3   2   3   38.15    3.08
  -3   2   3   34.29    2.78
  -2  -2   3  116.45    5.63
  -2  -2   3  115.80    5.60
   2  -2  -3  138.74    5.32
  -2  -2   3  114.48    5.71
   2   2  -3  123.89    5.44
  -2   2   3  128.16    5.79
  -2   2   3  134.79    5.65
  -2   2   3  125.39    5.68
  -2   2   3  125.80    6.89
   1  -2  -3    2.63    2.00
  -1  -2   3    0.42    2.08
  -1  -2   3    1.00    2.00
  -1  -2   3    2.79    2.22
  -1   2   3    1.05    2.05
   1   2  -3    2.46    2.08
  -1   2   3    2.66    2.02
  -1   2   3    1.33    2.20
   0  -2   3   78.23    4.97
   0  -2  -3   77.35    4.85
   0   2   3   78.89    4.89
   0   2  -3   80.57    5.00
  -1  -2  -3   32.96    3.36
   1  -2   3   32.03    3.35
   1   2   3   34.88    3.40
  -1   2  -3   36.88    3.49
  -2  -2  -3  473.97   15.96
   2  -2   3  482.62   15.57
  -2  -2  -3  477.29   16.17
  -2  -2  -3  481.06   16.23
   2   2   3  476.72   15.66
  -2   2  -3  478.43   15.78
  -2   2  -3  499.33   16.16
  -3  -2  -3   97.15    5.47
  -3  -2  -3   97.80    5.49
   3  -2   3  100.43    5.05
  -3   2  -3  106.54    5.54
  -3   2  -3  102.35    5.39
   3   2   3   97.89    5.05
  -4  -2  -3  300.67   11.20
  -4  -2  -3  309.50   11.27
  -4   2  -3  305.18   11.07
  -4   2  -3  289.64   11.06
  -5  -2  -3    8.83    2.61
  -5  -2  -3   10.83    2.73
  -5   2  -3    9.20    2.49
  -5   2  -3   12.80    2.79
  -6  -2  -3  126.46    6.83
  -6  -2  -3  121.84    6.70
  -6  -2  -3  130.07    6.83
  -6   2  -3  132.09    6.73
  -6   2  -3  127.15    6.66
  -7  -2  -3  126.66    7.19
  -7  -2  -3  146.45    7.53
  -7  -2  -3  148.40    7.46
  -7   2  -3  126.06    7.11
  -7   2  -3  126.63    7.19
  -8  -2  -3    4.04    3.45
  -8  -2  -3    7.21    3.05
  -8  -2  -3   11.92    5.17
  -8  -2  -3    8.11    3.28
  -8   2  -3    8.02    3.00
  -8   2  -3    8.64    3.46
  -8   2  -3    1.99    5.53
  -8   2  -3    7.68    3.25
  -9  -2  -3   76.48    8.88
  -9  -2  -3   74.36    6.45
  -9  -2  -3   69.20    5.97
  -9  -2  -3   61.79    6.34
  -9   2  -3   77.54    6.10
  -9   2  -3   63.90    5.93
  -9   2  -3   71.58    6.14
  -9   2  -3   75.59   10.28
 -10  -2  -3  102.23   10.78
 -10  -2  -3  104.38    8.26
 -10  -2  -3  111.61    8.44
 -10   2  -3  107.52   12.68
 -10   2  -3  100.72    8.05
 -10   2  -3  104.30    8.50
 -11  -2  -3   56.84    6.86
 -11  -2  -3   42.81    6.74
 -11   2  -3   52.75    6.58
 -11   2  -3   44.06   10.14
 -11   2  -3   44.48    6.48
 -12   2  -3   20.33    9.09
 -12   3   3   -0.06    7.55
 -11   3   3    5.63    8.11
 -10  -3   3    9.00    6.00
 -10   3   3   11.24    7.64
  -9  -3   3  129.78   10.47
  -9   3   3  130.93   12.88
  -8  -3   3   59.59    7.58
  -8   3   3   58.94    8.70
  -7  -3   3   35.54    3.32
  -7  -3   3   28.73    5.31
  -7   3   3   27.31    6.50
  -6  -3   3   26.42    2.98
  -6  -3   3   25.22    4.68
  -6  -3   3   22.09    2.68
  -6   3   3   28.13    2.79
  -6   3   3   29.34    5.87
  -5  -3   3   28.72    2.85
  -5  -3   3   34.37    3.22
  -5  -3   3   35.83    4.62
  -5   3   3   33.15    5.46
  -5   3   3   28.80    2.92
  -5   3   3   29.20    2.71
  -4  -3   3   11.75    2.55
  -4  -3   3   12.00    2.34
  -4  -3   3   11.92    2.24
  -4   3   3   14.15    2.35
  -4   3   3   10.85    2.12
  -4   3   3   10.08    3.95
  -4   3   3   12.58    2.46
  -3  -3   3   24.73    2.94
  -3  -3   3   30.98    3.29
  -3   3   3   27.14    2.88
  -3   3   3   32.30    3.10
  -3   3   3   29.49    3.17
  -3   3   3   31.11    4.54
  -2  -3   3  836.62   25.57
  -2  -3   3  801.95   26.06
   2  -3  -3  845.91   25.09
  -2   3   3  840.38   26.07
  -2   3   3  843.73   25.44
  -2   3   3  801.47   27.03
  -2   3   3  855.47   26.15
   2   3  -3  816.51   25.17
   1  -3  -3    5.10    2.28
  -1  -3   3    7.70    2.43
  -1  -3   3    4.93    2.44
   1   3  -3    4.57    2.28
  -1   3   3    4.16    2.20
  -1   3   3    5.09    2.60
  -1   3   3    7.34    2.53
   0  -3  -3  513.88   16.76
   0   3   3  518.45   16.71
   0   3  -3  496.05   16.68
  -1  -3  -3  224.05    8.71
   1  -3   3  204.93    8.40
  -1   3  -3  197.96    8.57
   1   3   3  209.21    8.54
  -2  -3  -3    0.42    2.00
   2  -3   3    2.59    2.23
  -2  -3  -3    1.38    2.15
  -2  -3  -3    2.10    2.36
  -2   3  -3   -1.01    2.29
   2   3   3    0.23    2.21
  -2   3  -3   -0.77    2.06
  -3  -3  -3   75.33    5.06
   3  -3   3   59.88    4.37
  -3  -3  -3   73.95    4.86
  -3  -3  -3   71.59    5.14
   3   3   3   62.39    4.46
  -3   3  -3   63.09    4.81
  -3   3  -3   59.94    4.64
  -4  -3  -3    4.03    2.61
  -4  -3  -3    5.33    2.39
  -4  -3  -3    7.95    2.74
  -4   3  -3    8.89    2.65
   4   3   3    3.94    1.93
  -4   3  -3    9.56    2.68
  -5  -3  -3   22.15    3.38
  -5  -3  -3   19.31    3.30
  -5  -3  -3   27.86    3.68
  -5   3  -3   26.99    3.35
  -5   3  -3   25.14    3.62
  -6  -3  -3    7.43    2.86
  -6  -3  -3    9.28    2.94
  -6  -3  -3   11.11    2.99
  -6   3  -3    9.27    2.91
  -6   3  -3    8.46    2.82
  -7  -3  -3   -0.26    2.68
  -7  -3  -3    0.98    2.88
  -7   3  -3    5.00    2.77
  -7   3  -3    1.51    2.76
  -8  -3  -3   79.65    6.54
  -8  -3  -3   71.08    6.28
  -8  -3  -3   65.46    7.74
  -8  -3  -3   74.28    6.22
  -8   3  -3   73.20    6.20
  -8   3  -3   73.28    9.67
  -8   3  -3   66.10    5.80
  -9  -3  -3   -1.63    3.00
  -9  -3  -3    1.05    3.59
  -9  -3  -3    2.47    3.94
  -9  -3  -3    1.08    4.34
  -9   3  -3    3.30    3.68
  -9   3  -3  -15.16    5.02
  -9   3  -3    1.37    3.14
  -9   3  -3   -6.11    2.86
 -10  -3  -3    3.54    4.36
 -10  -3  -3   -0.78    4.60
 -10   3  -3    0.00    3.85
 -10   3  -3    2.80    4.27
 -10   3  -3   -4.22    6.68
 -11  -3  -3    7.54    5.08
 -11  -3  -3   16.01    5.76
 -11   3  -3    9.57    4.82
 -11   3  -3   10.58    8.06
 -11   3  -3    4.22    4.96
 -12   4   3   32.60   10.56
 -11   4   3   10.75    8.93
 -10   4   3   19.91    8.19
  -9  -4   3   64.18    7.87
  -9   4   3   50.29    9.49
  -8  -4   3  143.78    7.08
  -8  -4   3  138.02    9.71
  -8  -4   3  148.59    7.38
  -8   4   3  154.90   12.51
  -7  -4   3   98.41    7.86
  -7  -4   3  105.75    5.99
  -7  -4   3  101.31    5.99
  -7   4   3  119.54    5.73
  -7   4   3  104.16   10.41
  -6  -4   3  121.75    7.73
  -6  -4   3  108.69    5.98
  -6  -4   3  114.32    6.15
  -6   4   3  121.98    5.89
  -6   4   3  123.45    5.92
  -6   4   3  124.41    5.93
  -6   4   3  117.95   10.13
  -5  -4   3  211.60    8.90
  -5  -4   3  231.76    9.12
  -5   4   3  229.38    8.86
  -5   4   3  233.72   12.09
  -5   4   3  238.62    8.88
  -5   4   3  237.65    8.87
  -4  -4   3   11.35    2.57
  -4  -4   3   14.42    2.80
  -4   4   3    9.58    3.95
  -4   4   3   14.57    2.57
  -4   4   3   12.83    2.53
  -4   4   3   15.10    2.93
  -3  -4   3  547.14   18.05
   3  -4  -3  568.29   17.17
  -3  -4   3  540.52   18.33
   3   4  -3  544.85   17.33
  -3   4   3  573.15   18.03
  -3   4   3  551.32   18.31
  -3   4   3  539.00   18.20
  -3   4   3  561.97   20.13
  -2  -4   3 1610.20   49.77
  -2  -4   3 1576.63   48.33
   2  -4  -3 1674.75   48.04
   2   4  -3 1664.54   48.11
  -2   4   3 1646.69   49.75
  -2   4   3 1619.08   48.30
  -2   4   3 1682.60   49.80
  -2   4   3 1586.41   50.47
   1  -4  -3 2298.52   67.21
  -1  -4   3 2317.99   67.36
  -1   4   3 2298.93   69.37
  -1   4   3 2334.79   69.43
   1   4  -3 2320.41   67.20
  -1   4   3 2249.74   67.25
   0  -4   3  303.01   11.70
   0  -4  -3  327.23   11.74
   0   4  -3  306.01   11.72
   0   4   3  335.27   11.86
  -1  -4  -3   26.20    3.58
   1  -4   3   22.41    3.32
  -1   4  -3   25.42    3.53
   1   4   3   19.83    3.27
  -2  -4  -3    8.65    2.25
  -2  -4  -3    6.44    2.50
   2  -4   3    6.65    2.51
  -2  -4  -3    9.48    2.86
  -2   4  -3   11.10    2.94
   2   4   3    9.78    2.78
  -2   4  -3    8.46    2.63
  -3  -4  -3   10.19    2.85
  -3  -4  -3   16.34    3.56
  -3  -4  -3   11.11    2.77
   3  -4   3   18.53    2.86
  -3   4  -3   18.00    3.31
   3   4   3    8.18    2.54
  -3   4  -3   18.09    3.09
   4  -4   3  145.22    6.52
  -4  -4  -3  167.99    7.95
  -4  -4  -3  156.04    7.57
  -4  -4  -3  181.08    7.91
  -4   4  -3  152.74    7.70
   4   4   3  163.93    6.87
  -4   4  -3  159.95    7.65
  -5  -4  -3    4.64    2.77
  -5  -4  -3    6.60    2.60
  -5  -4  -3    3.56    2.47
  -5   4  -3    4.73    2.66
  -5   4  -3    6.77    2.89
  -6  -4  -3   23.34    3.88
  -6  -4  -3   20.58    3.78
  -6  -4  -3   25.61    3.85
  -6   4  -3   31.33    4.19
  -6   4  -3   23.38    3.69
  -7  -4  -3  211.98   10.88
  -7  -4  -3  211.25    9.96
  -7  -4  -3  210.89    9.94
  -7  -4  -3  229.07   10.44
  -7   4  -3  221.26   10.02
  -7   4  -3  209.29    9.96
  -8  -4  -3    7.16    3.93
  -8  -4  -3    8.30    3.89
  -8  -4  -3   10.45    4.30
  -8   4  -3   12.07    3.83
  -8   4  -3   10.09    3.53
  -8   4  -3   12.26    6.48
  -9  -4  -3   59.16    6.57
  -9  -4  -3   54.76    6.25
  -9  -4  -3   54.80    5.96
  -9   4  -3   54.27    6.13
  -9   4  -3   53.35    9.33
  -9   4  -3   67.45    6.15
 -10  -4  -3   24.38    5.83
 -10  -4  -3   33.68    5.85
 -10   4  -3   31.66    5.29
 -10   4  -3   20.78    8.47
 -10   4  -3   26.81    5.65
 -11  -4  -3   20.61    5.51
 -11  -4  -3   22.01    6.63
 -11   4  -3   22.10    5.78
 -11   4  -3   17.83    5.47
 -11   4  -3   25.12    9.58
 -11   5   3   29.26   10.00
 -10  -5   3   55.65    5.79
 -10   5   3   33.58    9.23
  -9  -5   3    9.46    3.94
  -9   5   3    3.38    6.81
  -8  -5   3   16.30    3.43
  -8  -5   3   21.77    3.99
  -8   5   3   13.89    6.64
  -8   5   3   21.59    3.42
  -8   5   3   21.28    3.59
  -8   5   3   19.08    3.65
  -7  -5   3   43.52    4.40
  -7  -5   3   51.58    4.67
  -7   5   3   24.51    6.77
  -7   5   3   34.18    4.08
  -7   5   3   41.43    4.18
  -7   5   3   44.79    4.26
  -6  -5   3   89.49    5.87
  -6  -5   3   92.18    6.10
  -6   5   3   84.58    5.72
  -6   5   3   99.06    5.83
  -6   5   3   97.03    5.78
  -6   5   3   92.00    9.18
  -5  -5   3   13.43    3.20
  -5  -5   3   15.10    2.91
  -5   5   3   13.30    3.00
  -5   5   3   15.98    4.81
  -5   5   3   16.00    2.96
  -5   5   3   18.57    3.06
  -4  -5   3    6.86    2.77
  -4  -5   3    7.55    2.63
  -4   5   3    7.19    2.60
  -4   5   3   12.60    4.54
  -4   5   3    3.00    2.46
  -4   5   3    5.16    2.76
   3  -5  -3 1211.75   36.30
  -3  -5   3 1199.82   38.11
  -3  -5   3 1237.95   37.30
  -3   5   3 1240.56   37.08
  -3   5   3 1239.80   39.58
  -3   5   3 1178.05   37.93
  -3   5   3 1223.86   37.99
   3   5  -3 1226.97   36.51
  -2  -5   3  621.74   20.57
  -2  -5   3  640.73   21.03
   2  -5  -3  642.98   20.14
  -2   5   3  598.95   20.78
  -2   5   3  635.69   20.49
  -2   5   3  603.61   21.55
  -2   5   3  622.15   20.90
   2   5  -3  627.81   20.15
  -1  -5   3  350.66   13.07
   1  -5  -3  347.02   12.63
  -1  -5   3  365.21   13.04
  -1   5   3  352.17   13.08
  -1   5   3  336.60   12.83
   1   5  -3  340.21   12.65
  -1   5   3  343.53   13.16
   0  -5   3  940.62   29.80
   0  -5  -3  971.50   29.78
   0   5   3  968.34   29.81
   0   5  -3  936.64   29.72
  -1  -5  -3  399.87   14.74
   1  -5   3  405.48   14.57
  -1   5  -3  409.13   14.72
   1   5   3  425.51   14.69
   2  -5   3  194.26    8.42
  -2  -5  -3  184.21    8.63
  -2  -5  -3  188.41    8.78
  -2  -5  -3  181.62    8.49
   2   5   3  182.81    8.44
  -2   5  -3  190.57    8.58
  -2   5  -3  185.69    8.58
  -3  -5  -3   61.78    5.37
  -3  -5  -3   69.64    5.28
   3  -5   3   58.21    4.77
  -3  -5  -3   82.26    6.40
   3   5   3   63.17    5.04
  -3   5  -3   63.45    5.44
  -3   5  -3   66.55    5.46
   4  -5   3  730.67   23.08
  -4  -5  -3  743.69   24.42
  -4  -5  -3  784.21   24.99
  -4  -5  -3  736.55   24.76
  -4   5  -3  728.96   24.16
   4   5   3  720.25   23.31
  -4   5  -3  740.44   24.63
  -5  -5  -3  144.40    8.09
  -5  -5  -3  153.81    8.29
  -5  -5  -3  154.05    7.99
  -5   5  -3  160.11    8.09
  -5   5  -3  164.12    8.22
  -6  -5  -3   17.34    3.84
  -6  -5  -3   14.87    3.48
  -6  -5  -3    9.82    3.64
  -6   5  -3   15.29    3.47
  -6   5  -3   13.91    3.40
  -7  -5  -3  160.69    9.06
  -7  -5  -3  160.79    8.83
  -7  -5  -3  165.05    9.08
  -7  -5  -3  159.13    8.84
  -7   5  -3  160.18    8.88
  -7   5  -3  145.54    8.47
  -8  -5  -3  177.38    9.65
  -8  -5  -3  176.96   10.29
  -8  -5  -3  175.42    9.82
  -8  -5  -3  163.37   10.08
  -8   5  -3  181.87    9.87
  -8   5  -3  191.64   13.45
  -8   5  -3  192.67    9.56
  -9  -5  -3   40.64    6.03
  -9  -5  -3   40.05    5.82
  -9  -5  -3   53.48    6.18
  -9   5  -3   38.03    8.63
  -9   5  -3   37.10    5.69
  -9   5  -3   42.37    5.41
 -10  -5  -3   -7.48    4.64
 -10  -5  -3    7.33    4.84
 -10   5  -3    1.24    7.23
 -10   5  -3   -0.64    4.57
 -11  -5  -3    7.78    5.82
 -11  -5  -3   11.51    5.55
 -11   5  -3   14.98    5.57
 -11   5  -3   11.45    5.18
 -11   5  -3    0.27    8.05
 -11  -6   3    0.30    4.98
 -11  -6   3    6.17    5.09
 -11   6   3    5.72    8.16
 -10  -6   3   18.78    4.98
 -10   6   3    9.10    4.38
 -10   6   3   13.39    8.24
  -9  -6   3   47.39    5.94
  -9  -6   3   53.44    5.16
  -9   6   3   49.32    5.50
  -9   6   3   46.91    5.45
  -9   6   3   59.28   10.11
  -8  -6   3   52.92    5.29
  -8  -6   3   58.74    5.76
  -8   6   3   64.65    5.62
  -8   6   3   57.95    5.49
  -8   6   3   60.25    9.53
  -8   6   3   59.52    5.24
  -7  -6   3  165.58    8.36
  -7  -6   3  146.59    8.26
  -7   6   3  155.81    8.07
  -7   6   3  154.16   12.11
  -7   6   3  148.22    8.18
  -7   6   3  151.10    7.88
  -6  -6   3   -1.84    2.61
  -6  -6   3    1.23    2.81
  -6   6   3   -1.20    2.75
  -6   6   3    1.77    2.81
  -6   6   3    0.96    4.67
  -6   6   3   -3.53    2.49
  -5  -6   3   -1.55    2.66
  -5  -6   3    0.98    2.63
  -5   6   3    1.60    2.82
  -5   6   3    2.86    2.59
  -5   6   3   -0.96    4.27
  -5   6   3   -0.43    2.63
  -4  -6   3   18.36    3.35
  -4  -6   3   19.53    3.62
  -4   6   3   16.73    3.40
   4   6  -3   19.90    2.72
  -4   6   3   15.33    3.37
  -4   6   3   16.01    3.47
  -4   6   3   17.12    4.93
  -3  -6   3  481.22   17.97
  -3  -6   3  505.16   17.95
   3  -6  -3  517.25   17.04
  -3   6   3  510.10   19.34
  -3   6   3  528.08   18.07
  -3   6   3  537.83   18.17
  -3   6   3  536.81   17.90
   3   6  -3  506.02   17.20
  -2  -6   3  193.66    9.16
  -2  -6   3  201.26    9.24
   2   6  -3  197.12    8.84
  -2   6   3  197.30    9.73
  -2   6   3  207.54    9.25
  -2   6   3  187.13    9.02
  -2   6   3  203.06    9.24
  -1  -6   3    6.34    2.43
  -1  -6   3    4.86    2.98
   1  -6  -3    5.49    2.75
  -1   6   3    2.72    2.83
   1   6  -3   11.60    3.26
  -1   6   3    3.17    3.17
  -1   6   3    5.73    3.22
   0  -6  -3    2.78    2.79
   0  -6   3    1.61    2.68
   0   6  -3    3.42    2.81
   0   6   3    1.00    2.98
  -1  -6  -3  149.65    8.15
   1  -6   3  149.56    7.84
   1   6   3  161.95    8.04
  -1   6  -3  151.89    8.06
  -2  -6  -3   17.07    3.52
  -2  -6  -3   13.63    3.27
   2  -6   3   16.25    3.37
  -2  -6  -3   15.79    3.56
  -2   6  -3   19.56    3.68
  -2   6  -3   21.44    4.66
   2   6   3   17.60    3.64
  -3  -6  -3  368.01   14.12
  -3  -6  -3  365.08   13.87
   3  -6   3  353.51   13.19
  -3  -6  -3  358.55   13.89
  -3   6  -3  350.87   13.87
  -3   6  -3  367.85   13.76
   3   6   3  360.46   13.39
   4  -6   3    3.83    2.32
  -4  -6  -3    4.69    3.04
  -4  -6  -3    4.91    2.66
  -4  -6  -3    0.94    2.44
   4   6   3   -1.56    2.20
  -4   6  -3    2.09    2.74
  -4   6  -3    2.66    2.93
  -5  -6  -3  157.46    8.62
  -5  -6  -3  161.09    8.42
  -5  -6  -3  147.07    8.67
  -5   6  -3  164.69    8.45
  -5   6  -3  155.58    8.53
  -6  -6  -3  134.73    8.41
  -6  -6  -3  140.49    8.13
  -6  -6  -3  147.30    8.58
  -6   6  -3  123.40    8.05
  -6   6  -3  140.27    8.22
  -7  -6  -3    9.10    4.14
  -7  -6  -3   17.53    4.05
  -7  -6  -3   14.74    4.12
  -7  -6  -3   16.70    3.77
  -7   6  -3   18.23    4.05
  -7   6  -3   15.21    4.07
  -8  -6  -3   -3.34    3.68
  -8  -6  -3    2.90    3.52
  -8  -6  -3   -0.60    3.37
  -8   6  -3   -5.59    5.68
  -8   6  -3    2.04    3.48
  -8   6  -3    4.48    3.90
  -9  -6  -3   64.50    7.21
  -9  -6  -3   79.16    7.73
  -9   6  -3   73.48    6.99
  -9   6  -3   80.01   11.16
  -9   6  -3   70.12    7.29
 -10  -6  -3    5.08    5.30
 -10  -6  -3   -1.89    4.71
 -10  -6  -3   -2.45    3.75
 -10   6  -3    3.72    4.75
 -10   6  -3    5.13    7.59
 -11  -6  -3    8.33    5.63
 -11  -6  -3   -2.91    5.83
 -11   6  -3   -5.08    4.39
 -11   6  -3   -3.37    7.70
 -11   6  -3    9.08    5.56
 -11  -7   3   50.09    7.02
 -11  -7   3   55.92    7.63
 -11   7   3   45.14   10.70
 -11   7   3   48.86    6.70
 -10  -7   3   29.42    5.92
 -10   7   3   43.41    6.06
 -10   7   3   50.19   10.45
  -9  -7   3    3.83    4.45
  -9  -7   3   -3.11    3.37
  -9   7   3    2.89    4.18
  -9   7   3    1.73    4.32
  -9   7   3   12.31    7.70
  -8  -7   3   32.50    4.90
  -8  -7   3   29.91    5.07
  -8   7   3   42.30    5.17
  -8   7   3   40.08    8.37
  -8   7   3   29.31    4.65
  -8   7   3   27.18    4.95
  -7  -7   3  130.99    8.12
  -7  -7   3  127.84    8.26
  -7   7   3  129.84    8.26
  -7   7   3  140.42    8.05
  -7   7   3  147.47    8.32
  -7   7   3  131.57   12.27
  -6  -7   3   57.98    5.57
  -6  -7   3   55.94    5.65
  -6   7   3   53.43    7.58
  -6   7   3   64.05    5.79
  -6   7   3   51.79    5.40
  -6   7   3   51.66    5.23
  -5  -7   3   15.66    3.78
  -5  -7   3   15.26    3.73
  -5   7   3    9.73    3.47
  -5   7   3   10.48    3.47
  -5   7   3   12.48    3.60
  -5   7   3    9.73    5.02
  -4  -7   3  114.82    6.86
  -4  -7   3  111.51    7.31
   4  -7  -3  117.79    5.89
  -4   7   3  113.45    7.12
  -4   7   3  108.19    8.66
  -4   7   3  117.40    7.27
  -4   7   3  113.19    7.06
   4   7  -3  114.91    6.10
   3  -7  -3  918.78   28.26
  -3  -7   3  920.62   29.69
  -3  -7   3  889.91   29.04
  -3   7   3  854.13   28.74
  -3   7   3  863.27   29.45
  -3   7   3  932.22   29.62
   3   7  -3  915.19   28.40
  -3   7   3  872.08   30.49
  -2  -7   3   67.11    5.96
   2  -7  -3   79.15    5.70
  -2  -7   3   76.03    5.81
  -2   7   3   77.14    6.43
  -2   7   3   74.14    6.49
  -2   7   3   72.79    5.98
   2   7  -3   68.94    5.72
  -2   7   3   76.28    6.23
   1  -7  -3  779.08   25.46
  -1  -7   3  776.26   25.80
  -1   7   3  747.37   26.04
   1   7  -3  784.76   25.58
  -1   7   3  808.99   25.97
  -1   7   3  783.59   25.77
   0  -7   3  209.91   10.22
   0  -7  -3  243.29   10.55
   0   7   3  247.56   10.61
   0   7  -3  219.29   10.27
   1  -7   3   16.28    3.61
  -1  -7  -3   13.56    3.48
  -1   7  -3   17.12    3.73
   1   7   3   15.13    3.58
  -2  -7  -3   41.49    4.94
  -2  -7  -3   27.72    3.85
   2  -7   3   28.35    4.17
  -2  -7  -3   38.35    4.63
  -2   7  -3   30.79    4.22
  -2   7  -3   24.98    4.20
   2   7   3   34.62    4.35
  -3  -7  -3  161.66    8.62
  -3  -7  -3  157.43    8.38
   3  -7   3  150.29    7.81
   3   7   3  163.09    8.12
  -3   7  -3  142.26    8.20
  -3   7  -3  144.56    8.48
  -4  -7  -3  275.55   12.31
  -4  -7  -3  295.00   12.65
   4  -7   3  316.15   11.67
  -4  -7  -3  298.64   12.71
  -4   7  -3  304.90   12.65
   4   7   3  294.28   11.80
  -4   7  -3  304.17   12.60
  -5  -7  -3  127.03    8.20
  -5  -7  -3  130.95    7.99
  -5  -7  -3  117.73    7.60
  -5   7  -3  130.14    8.08
  -5   7  -3  131.90    8.06
  -6  -7  -3   18.26    4.19
  -6  -7  -3   20.81    4.46
  -6  -7  -3   24.47    4.71
  -6   7  -3   18.93    4.46
  -6   7  -3   27.80    4.71
  -7  -7  -3   15.46    4.72
  -7  -7  -3   19.69    4.66
  -7  -7  -3   22.98    4.52
  -7   7  -3   18.69    6.48
  -7   7  -3   20.96    4.53
  -7   7  -3   16.78    4.40
  -8  -7  -3   10.90    4.24
  -8  -7  -3   18.54    4.83
  -8  -7  -3   20.97    5.19
  -8   7  -3   30.19    5.23
  -8   7  -3   19.74    4.93
  -8   7  -3   12.41    6.59
  -9  -7  -3    7.87    5.22
  -9  -7  -3   14.86    4.56
  -9  -7  -3    5.30    4.74
  -9   7  -3    2.92    6.72
  -9   7  -3   10.25    4.72
  -9   7  -3   12.17    4.62
 -10  -7  -3    4.98    5.51
 -10  -7  -3   20.69    5.87
 -10   7  -3    9.40    7.86
 -10   7  -3   12.36    5.30
 -11  -7  -3   -3.98    5.68
 -11  -7  -3    2.41    6.12
 -11   7  -3    2.38    5.66
 -11   7  -3   -1.62    7.85
 -11  -8   3   -1.27    5.57
 -11  -8   3   -6.28    6.00
 -11   8   3   -4.66    5.27
 -11   8   3   12.73    8.66
 -10  -8   3   44.27    6.96
 -10   8   3   39.54   10.32
 -10   8   3   37.31    6.58
  -9  -8   3  180.90   11.18
  -9  -8   3  157.01   10.02
  -9   8   3  172.95   10.56
  -9   8   3  191.89    9.99
  -9   8   3  174.07   15.61
  -9   8   3  161.15   10.68
  -8  -8   3   63.81    6.84
  -8  -8   3   78.18    7.10
  -8   8   3   57.40    9.44
  -8   8   3   75.44    6.77
  -8   8   3   65.20    6.71
  -8   8   3   72.47    7.12
  -7  -8   3   59.54    6.32
  -7  -8   3   56.41    6.21
  -7   8   3   50.43    5.97
  -7   8   3   55.95    6.00
  -7   8   3   46.62    8.26
  -7   8   3   53.00    5.99
  -6  -8   3   65.82    6.43
  -6  -8   3   51.07    5.89
  -6   8   3   62.83    6.48
  -6   8   3   71.61    6.37
  -6   8   3   60.88    6.21
  -6   8   3   53.84    7.84
  -5  -8   3   59.43    5.84
  -5  -8   3   64.82    6.30
  -5   8   3   56.05    5.73
  -5   8   3   64.85    6.12
  -5   8   3   61.58    6.00
  -5   8   3   73.67    8.19
  -4  -8   3   81.10    6.84
   4  -8  -3   74.27    5.36
  -4  -8   3   72.68    5.96
  -4   8   3   73.36    6.40
   4   8  -3   69.56    5.45
  -4   8   3   79.06    8.02
  -4   8   3   75.15    6.36
  -4   8   3   65.20    6.12
  -3  -8   3  107.01    7.39
   3  -8  -3  101.51    6.28
  -3  -8   3   93.39    6.69
  -3   8   3   92.79    7.31
   3   8  -3  102.74    6.61
  -3   8   3  106.25    6.98
  -3   8   3   98.73    7.12
  -3   8   3  109.61    8.11
   2  -8  -3  187.42    8.89
  -2  -8   3  179.12    9.45
  -2  -8   3  168.08    9.13
  -2   8   3  196.46    9.46
  -2   8   3  178.49    9.46
   2   8  -3  164.04    8.92
  -2   8   3  189.28    9.29
  -2   8   3  194.76    9.70
   1  -8  -3  527.30   18.72
  -1  -8   3  519.50   19.03
  -1   8   3  512.29   19.18
  -1   8   3  514.03   18.85
  -1   8   3  541.08   18.78
   1   8  -3  518.73   18.62
   0  -8   3  108.55    7.46
   0  -8  -3  103.96    7.36
   0   8  -3  115.04    7.59
   0   8   3  114.51    7.70
   1  -8   3    3.50    3.14
  -1  -8  -3   13.17    3.71
   1   8   3    4.57    3.30
  -1   8  -3   -1.10    3.18
   2  -8   3  756.87   25.92
  -2  -8  -3  752.44   26.38
  -2  -8  -3  904.89   28.59
  -2   8  -3  749.43   26.77
  -2   8  -3  779.79   26.36
   2   8   3  777.51   26.08
  -3  -8  -3   88.71    7.12
  -3  -8  -3   98.67    6.65
   3  -8   3  101.93    6.69
  -3   8  -3  100.69    7.15
  -3   8  -3   95.12    7.24
   3   8   3   88.63    6.76
   4  -8   3    3.25    2.82
  -4  -8  -3    2.57    2.44
  -4  -8  -3    1.29    3.22
  -4  -8  -3    0.59    3.29
   4   8   3    2.96    2.79
  -4   8  -3   -0.34    3.05
  -4   8  -3    1.60    3.28
  -5  -8  -3  167.19    9.51
  -5  -8  -3  161.78    9.03
  -5  -8  -3  163.55    9.50
  -5   8  -3  166.10    9.61
  -5   8  -3  155.62    9.35
  -6  -8  -3  161.42    9.50
  -6  -8  -3  162.53   10.04
  -6  -8  -3  169.38   10.03
  -6   8  -3  186.81   10.26
  -6   8  -3  178.67   10.02
  -7  -8  -3   36.40    6.05
  -7  -8  -3   33.94    5.16
  -7  -8  -3   38.11    5.87
  -7   8  -3   45.81    5.98
  -7   8  -3   32.31    5.36
  -7   8  -3   35.21    7.46
  -8  -8  -3    4.88    4.65
  -8  -8  -3    5.12    4.20
  -8  -8  -3    6.78    4.14
  -8   8  -3    9.14    4.68
  -8   8  -3    9.16    4.97
  -8   8  -3    4.98    6.52
  -9  -8  -3    5.73    4.66
  -9  -8  -3   13.25    5.77
  -9  -8  -3   10.84    5.01
  -9   8  -3   10.57    5.22
  -9   8  -3   16.18    7.59
  -9   8  -3   14.93    5.08
 -10  -8  -3   30.97    6.95
 -10  -8  -3   38.90    7.23
 -10   8  -3   63.32    7.86
 -10   8  -3   45.71   10.42
 -10   8  -3   44.89    6.69
 -11  -8  -3   17.69    6.42
 -11  -8  -3   10.27    6.83
 -11   8  -3   -5.28    5.58
 -11   8  -3    0.50    7.90
 -11  -9   3    0.68    5.83
 -11  -9   3   -1.00    6.08
 -11   9   3   -2.83    7.67
 -11   9   3   -2.96    5.65
 -10  -9   3    1.20    5.40
 -10  -9   3   -0.84    5.43
 -10   9   3   -5.42    7.41
 -10   9   3   -0.11    5.57
  -9  -9   3    4.31    4.58
  -9  -9   3    0.53    4.91
  -9   9   3   -1.95    4.76
  -9   9   3   -4.63    3.69
  -9   9   3    2.75    7.31
  -8  -9   3   24.95    5.59
  -8  -9   3   31.37    5.56
  -8   9   3   26.04    5.31
  -8   9   3   34.72    5.90
  -8   9   3   27.13    5.86
  -8   9   3   32.93    8.61
  -7  -9   3   29.58    5.39
  -7  -9   3   28.19    5.09
  -7   9   3   21.32    7.15
  -7   9   3   28.29    5.28
  -7   9   3   26.59    5.40
  -7   9   3   35.33    5.49
  -6  -9   3   -2.52    3.56
  -6  -9   3    4.74    3.44
  -6   9   3   -3.30    3.63
  -6   9   3   -4.06    3.25
  -6   9   3   -4.71    4.86
  -6   9   3   -4.22    3.43
  -5  -9   3  308.84   13.82
  -5  -9   3  317.87   14.10
  -5   9   3  337.35   14.00
  -5   9   3  323.85   14.06
  -5   9   3  312.50   15.94
  -5   9   3  349.11   14.23
   4  -9  -3    5.33    2.89
  -4  -9   3   10.74    3.88
  -4  -9   3    4.07    2.95
  -4   9   3    1.44    4.15
  -4   9   3    4.03    3.62
   4   9  -3    3.32    2.79
  -4   9   3    3.63    3.47
  -4   9   3    2.37    3.46
  -3  -9   3  235.61   11.12
   3  -9  -3  226.29   10.32
  -3  -9   3  237.29   11.43
   3   9  -3  240.41   10.67
  -3   9   3  231.15   11.36
  -3   9   3  224.73   10.99
  -3   9   3  232.78   11.21
  -3   9   3  229.75   11.86
  -2  -9   3   25.50    4.68
  -2  -9   3   16.42    4.05
   2  -9  -3   13.20    3.56
  -2   9   3   18.05    4.23
   2   9  -3   23.35    4.24
  -2   9   3   24.93    4.25
  -2   9   3   17.47    4.36
  -2   9   3    8.65    3.91
   1  -9  -3  133.56    8.21
  -1  -9   3  109.76    7.95
  -1   9   3  121.92    8.48
  -1   9   3  154.75    9.51
  -1   9   3  127.60    7.72
   1   9  -3  130.44    8.26
   0  -9  -3    2.56    3.17
   0  -9   3    3.66    3.07
   0   9  -3    4.82    3.59
   0   9   3    9.70    3.76
   1  -9   3  261.58   11.87
  -1  -9  -3  264.55   12.14
  -1   9  -3  258.25   11.99
   1   9   3  260.41   12.08
  -2  -9  -3   15.54    4.28
  -2  -9  -3   11.16    2.98
   2  -9   3   10.91    3.56
   2   9   3   16.77    3.94
  -2   9  -3   22.35    5.04
  -2   9  -3   15.23    4.12
  -3  -9  -3  108.62    7.28
  -3  -9  -3  105.66    7.84
   3  -9   3  121.91    7.47
  -3  -9  -3  108.58    8.00
   3   9   3  100.39    7.45
  -3   9  -3  104.53    7.98
  -3   9  -3  122.76    8.16
   4  -9   3   63.72    5.77
  -4  -9  -3   49.12    5.85
  -4  -9  -3   42.89    5.06
  -4  -9  -3   57.86    6.77
   4   9   3   56.11    5.69
  -4   9  -3   54.66    6.24
  -4   9  -3   60.74    6.58
  -5  -9  -3    1.84    3.03
  -5  -9  -3   -3.12    3.10
  -5  -9  -3   -0.90    3.24
  -5   9  -3    7.52    3.86
  -5   9  -3    1.06    3.63
  -6  -9  -3    1.20    3.52
  -6  -9  -3    0.20    3.59
  -6  -9  -3    2.38    3.49
  -6   9  -3    5.95    4.25
  -6   9  -3    4.52    3.86
  -7  -9  -3    7.56    4.63
  -7  -9  -3   16.86    5.30
  -7  -9  -3   10.02    4.23
  -7   9  -3   14.17    6.45
  -7   9  -3   17.94    5.15
  -7   9  -3   19.30    5.37
  -8  -9  -3   43.20    6.49
  -8  -9  -3   41.44    6.83
  -8  -9  -3   44.65    6.68
  -8   9  -3   29.52    8.28
  -8   9  -3   49.85    6.85
  -8   9  -3   38.31    6.32
  -9  -9  -3    0.57    5.26
  -9  -9  -3    3.28    4.71
  -9  -9  -3    0.31    4.76
  -9   9  -3   -1.12    6.50
  -9   9  -3    2.18    4.67
  -9   9  -3   -3.46    4.37
 -10  -9  -3    6.46    5.45
 -10  -9  -3   -1.53    4.60
 -10  -9  -3    4.77    6.27
 -10   9  -3    5.01    5.01
 -10   9  -3   15.19    8.26
 -10   9  -3    0.64    5.51
 -11  -9  -3   -5.54    5.59
 -11  -9  -3   -6.27    6.54
 -11   9  -3    3.02    6.17
 -11   9  -3    2.76    7.85
 -11 -10   3    9.75    6.93
 -11 -10   3   16.95    7.04
 -11  10   3   16.63    6.73
 -11  10   3   -6.29    8.24
 -10 -10   3   11.05    5.16
 -10 -10   3    9.25    6.58
 -10 -10   3    4.38    6.03
 -10  10   3   12.24    6.11
 -10  10   3   11.04    8.29
  -9 -10   3    7.95    5.24
  -9 -10   3    8.47    5.66
  -9  10   3   11.92    5.19
  -9  10   3    7.30    7.46
  -9  10   3   13.44    5.82
  -8 -10   3   24.09    5.50
  -8 -10   3   13.16    5.11
  -8  10   3    6.12    5.20
  -8  10   3   21.13    8.26
  -8  10   3   12.90    4.98
  -8  10   3   14.35    5.32
  -7 -10   3   42.42    6.46
  -7 -10   3   29.00    5.66
  -7  10   3   23.10    7.38
  -7  10   3   24.45    5.30
  -7  10   3   47.35    6.41
  -7  10   3   34.60    6.17
  -6 -10   3   48.35    6.07
  -6 -10   3   52.14    6.74
  -6  10   3   61.60    6.60
  -6  10   3   46.32    7.98
  -6  10   3   63.51    6.92
  -6  10   3   54.26    6.42
  -5 -10   3  270.21   12.54
  -5 -10   3  242.91   12.71
  -5  10   3  266.48   14.50
  -5  10   3  252.23   12.57
  -5  10   3  253.53   12.60
  -5  10   3  248.33   12.39
  -4 -10   3   29.03    5.21
  -4 -10   3   25.69    4.70
  -4  10   3   29.54    5.98
  -4  10   3   26.48    4.99
   4  10  -3   31.18    4.45
  -4  10   3   23.91    5.07
  -4  10   3   26.26    5.05
  -3 -10   3    1.42    2.75
  -3 -10   3   11.21    3.87
   3 -10  -3    2.18    3.07
   3  10  -3    3.49    3.21
  -3  10   3    8.85    4.24
  -3  10   3   11.34    3.87
  -3  10   3   -1.81    3.80
  -3  10   3   10.31    3.47
  -2 -10   3   13.44    3.94
   2 -10  -3    9.64    3.62
  -2  10   3   10.44    3.35
  -2  10   3   17.50    4.43
   2  10  -3   14.40    4.04
  -2  10   3   12.77    4.30
  -2  10   3   15.57    4.16
   1 -10  -3    0.34    3.29
  -1 -10   3   -0.52    3.19
  -1  10   3    1.80    3.23
   1  10  -3    7.48    3.71
  -1  10   3   -2.13    3.39
  -1  10   3    5.45    3.12
   0 -10   3   98.51    8.26
   0 -10  -3   81.36    7.21
   0  10   3   79.86    7.15
   0  10  -3   92.29    7.45
  -1 -10  -3   73.72    6.96
   1 -10   3   67.28    6.49
  -1  10  -3   81.80    7.48
   1  10   3   92.08    7.51
  -2 -10  -3   27.02    4.08
  -2 -10  -3   26.38    4.51
  -2 -10  -3   35.67    5.53
   2 -10   3   32.10    4.90
  -2  10  -3   38.29    5.66
   2  10   3   30.33    5.14
  -2  10  -3   37.94    5.45
  -3 -10  -3   59.80    6.29
   3 -10   3   68.91    6.60
  -3 -10  -3   68.46    7.05
   3  10   3   71.26    6.73
  -3  10  -3   71.52    6.91
  -3  10  -3   78.33    7.43
  -4 -10  -3   80.68    8.00
  -4 -10  -3   92.62    7.17
   4 -10   3   88.72    6.81
  -4 -10  -3   79.05    7.80
  -4  10  -3   78.44    7.50
  -4  10  -3   91.16    8.27
   4  10   3   86.41    7.13
  -5 -10  -3   13.23    3.93
  -5 -10  -3    4.60    3.41
  -5 -10  -3   11.01    4.35
  -5  10  -3   13.87    4.88
  -5  10  -3    9.83    4.34
  -6 -10  -3   20.02    5.06
  -6 -10  -3   20.85    4.81
  -6 -10  -3   26.43    5.47
  -6  10  -3   23.84    5.86
  -6  10  -3   25.89    5.79
  -7 -10  -3   26.36    5.87
  -7 -10  -3   33.01    6.12
  -7 -10  -3   34.78    6.73
  -7  10  -3   21.55    7.23
  -7  10  -3   37.88    6.51
  -7  10  -3   34.30    6.53
  -8 -10  -3   15.03    5.60
  -8 -10  -3   23.28    5.56
  -8 -10  -3   20.08    5.97
  -8  10  -3   24.30    6.13
  -8  10  -3   17.81    7.44
  -8  10  -3   16.04    5.93
  -9 -10  -3   17.83    6.14
  -9 -10  -3   22.43    7.09
  -9 -10  -3   20.17    5.98
  -9  10  -3   20.65    6.01
  -9  10  -3   15.12    6.10
  -9  10  -3   23.11    8.33
 -10 -10  -3   43.48    7.44
 -10 -10  -3   22.73    6.16
 -10  10  -3   28.19    6.62
 -10  10  -3   22.00    8.81
 -10  10  -3   29.70    7.33
 -10 -11   3   -1.63    6.01
 -10 -11   3   -7.55    4.70
 -10 -11   3    4.84    6.52
 -10  11   3    9.54    8.44
 -10  11   3   -2.77    5.96
  -9 -11   3    5.16    5.56
  -9 -11   3   27.70    6.61
  -9 -11   3   10.85    5.94
  -9  11   3   11.01    5.63
  -9  11   3   21.11    6.61
  -9  11   3   27.77    9.04
  -8 -11   3    8.42    5.51
  -8 -11   3    5.11    5.19
  -8  11   3   21.22    5.93
  -8  11   3    9.58    5.55
  -8  11   3   21.86    7.92
  -7 -11   3  147.67   10.30
  -7 -11   3  133.27   10.91
  -7  11   3  139.35   13.24
  -7  11   3  150.69   10.88
  -7  11   3  149.26   10.74
  -7  11   3  149.67   11.14
  -6 -11   3   18.30    5.63
  -6 -11   3   23.14    5.21
  -6  11   3   28.59    7.38
  -6  11   3   19.36    5.65
  -6  11   3   23.73    5.11
  -6  11   3   24.25    5.96
  -5 -11   3   28.19    5.15
  -5 -11   3   27.92    5.79
  -5  11   3   37.98    6.12
  -5  11   3   24.61    5.64
  -5  11   3   33.51    7.12
  -5  11   3   30.88    5.68
  -4 -11   3  136.52    9.83
  -4 -11   3  149.53    9.52
  -4  11   3  150.02   10.06
   4  11  -3  146.50    8.95
  -4  11   3  153.54    9.76
  -4  11   3  151.72   10.74
  -4  11   3  167.24   10.30
  -3 -11   3  145.10    9.08
  -3 -11   3  156.79    9.97
   3 -11  -3  137.21    8.76
  -3  11   3  144.81    9.51
   3  11  -3  146.38    9.08
  -3  11   3  150.56    9.42
  -3  11   3  135.03    9.60
  -3  11   3  155.34   10.03
  -2 -11   3   88.02    7.12
   2 -11  -3   82.48    7.32
  -2 -11   3   85.22    7.77
  -2  11   3   84.93    8.03
  -2  11   3   84.59    7.95
  -2  11   3   87.55    8.50
  -2  11   3   85.59    7.72
   2  11  -3   88.92    7.59
   1 -11  -3    3.96    3.48
  -1 -11   3   -0.32    3.49
  -1  11   3   -1.34    3.20
  -1  11   3    0.16    3.76
   1  11  -3   -1.59    3.38
   0 -11  -3  151.78    9.64
   0 -11   3  143.78    9.58
   0  11  -3  163.74    9.94
   0  11   3  142.27    9.63
  -1 -11  -3  465.27   18.92
   1 -11   3  467.50   18.63
   1  11   3  472.67   18.75
  -1  11  -3  483.53   18.86
  -2 -11  -3   68.46    7.14
   2 -11   3   88.77    7.71
  -2 -11  -3   72.47    6.95
  -2  11  -3   84.00    7.97
   2  11   3   69.11    7.21
  -3 -11  -3   41.33    5.55
   3 -11   3   37.91    5.40
  -3 -11  -3   34.93    5.75
  -3  11  -3   26.97    5.16
   3  11   3   29.84    5.23
  -4 -11  -3  147.72    9.48
   4 -11   3  159.99    9.18
  -4 -11  -3  141.39   10.25
  -4  11  -3  148.96   10.22
  -4  11  -3  167.39   10.47
   4  11   3  160.89    9.70
  -5 -11  -3   42.00    6.81
  -5 -11  -3   54.11    6.47
  -5  11  -3   63.90    7.56
  -5  11  -3   58.20    7.28
  -6 -11  -3   28.84    5.80
  -6 -11  -3   26.41    5.72
  -6  11  -3   16.44    6.52
  -6  11  -3   23.81    5.82
  -6  11  -3   18.36    5.50
  -7 -11  -3    8.83    4.83
  -7 -11  -3   15.46    5.33
  -7  11  -3   16.31    5.70
  -7  11  -3   11.41    5.31
  -7  11  -3    3.31    6.51
  -8 -11  -3  159.70   11.16
  -8 -11  -3  155.86   11.80
  -8  11  -3  150.71   11.95
  -8  11  -3  123.51   13.41
  -8  11  -3  154.76   11.68
  -9 -11  -3   35.10    7.11
  -9 -11  -3   23.01    6.25
  -9  11  -3   31.32    7.67
  -9  11  -3   21.59    8.71
  -9  11  -3   25.37    6.36
 -10 -11  -3    0.26    5.58
 -10 -11  -3   -2.63    5.12
 -10  11  -3    3.91    7.57
 -10  11  -3    3.70    5.42
 -10 -12   3    0.91    6.46
 -10 -12   3   -0.34    5.69
 -10  12   3    6.19    8.16
 -10  12   3    2.37    6.56
  -9 -12   3   33.22    7.23
  -9 -12   3   31.77    7.09
  -9  12   3   43.58    7.82
  -9  12   3   40.06    7.69
  -9  12   3   39.73    9.94
  -8 -12   3    8.77    5.74
  -8 -12   3   11.17    5.31
  -8  12   3    9.60    6.24
  -8  12   3    3.11    6.90
  -8  12   3   18.09    6.36
  -7 -12   3    8.94    4.92
  -7 -12   3   22.56    6.06
  -7  12   3   14.93    6.34
  -7  12   3   19.33    7.49
  -7  12   3    7.95    5.68
  -6 -12   3    6.69    5.03
  -6 -12   3    3.23    3.82
  -6  12   3    9.78    6.18
  -6  12   3    5.57    5.37
  -6  12   3    7.22    4.50
  -6  12   3   15.27    5.46
  -5 -12   3   91.49    8.60
  -5 -12   3   97.64    9.22
  -5  12   3   98.25    9.42
  -5  12   3  100.25    9.27
  -5  12   3   80.45    8.46
  -5  12   3   81.82    9.84
  -4 -12   3   28.19    5.72
  -4 -12   3   25.27    5.17
  -4  12   3   33.76    6.16
  -4  12   3   31.52    5.50
  -4  12   3   36.10    6.75
  -3 -12   3   -2.54    3.76
   3 -12  -3    0.93    3.45
  -3 -12   3   -1.78    3.08
  -3  12   3    4.00    4.43
  -3  12   3    3.51    3.52
  -3  12   3   -5.04    3.91
   3  12  -3    0.46    3.64
  -2 -12   3   21.85    5.22
   2 -12  -3   26.66    5.19
  -2  12   3   39.08    5.95
   2  12  -3   21.47    5.06
  -2  12   3   30.86    5.25
  -2  12   3   23.52    5.49
   1 -12  -3   66.51    7.07
  -1 -12   3   71.26    7.82
  -1  12   3   64.03    7.54
  -1  12   3   72.89    6.84
   1  12  -3   57.69    6.94
   0 -12   3    6.04    4.07
   0 -12  -3    3.31    3.94
   0  12  -3   -1.38    3.81
   0  12   3   -1.04    4.31
   1 -12   3  231.71   12.07
  -1 -12  -3  218.93   12.30
   1  12   3  210.57   12.03
  -1  12  -3  220.97   12.19
  -2 -12  -3  186.03   11.34
   2 -12   3  182.61   10.76
   2  12   3  173.53   10.78
  -2  12  -3  190.34   11.33
   3 -12   3  174.50   10.34
  -3 -12  -3  180.56   11.17
   3  12   3  170.47   10.61
  -3  12  -3  156.73   10.90
  -4 -12  -3   21.81    5.25
   4  12   3   29.58    5.54
  -4  12  -3   28.58    5.86
  -5 -12  -3   45.74    6.99
  -5 -12  -3   52.82    7.42
  -5  12  -3   52.41    7.40
  -6 -12  -3   15.89    4.54
  -6 -12  -3    8.70    5.16
  -6  12  -3    6.00    5.28
  -6  12  -3    6.13    5.95
  -7 -12  -3   21.19    5.17
  -7 -12  -3   21.25    5.97
  -7  12  -3   29.44    6.97
  -7  12  -3   29.32    8.10
  -8 -12  -3   17.43    6.37
  -8 -12  -3   13.10    5.12
  -8  12  -3   18.04    6.14
  -8  12  -3   14.52    7.62
  -9 -12  -3   -0.10    5.56
  -9 -12  -3    2.20    5.39
  -9  12  -3   -1.59    6.93
  -9  12  -3    4.68    6.03
 -10 -12  -3    1.45    5.85
 -10  12  -3   -0.94    7.08
 -10  12  -3   -7.80    5.65
 -10 -13   3   -0.96    6.11
 -10 -13   3    6.00    6.68
 -10  13   3   -1.76    5.93
 -10  13   3    5.54    8.12
  -9 -13   3    6.48    6.11
  -9 -13   3   11.44    6.66
  -9  13   3    9.00    8.31
  -9  13   3   21.22    6.78
  -8 -13   3   38.42    7.83
  -8 -13   3   41.64    7.52
  -8  13   3   44.01    8.31
  -8  13   3   37.93    9.39
  -7 -13   3   25.28    7.06
  -7 -13   3   33.67    6.33
  -7  13   3   37.41    7.35
  -7  13   3   32.49    8.76
  -6 -13   3   -2.57    4.87
  -6  13   3   -2.53    5.65
  -6  13   3    6.62    5.59
  -5 -13   3   17.70    5.73
  -5  13   3    5.18    5.23
  -5  13   3   10.14    4.90
  -5  13   3   15.83    6.33
  -4 -13   3   -0.51    4.47
  -4  13   3    1.51    3.99
  -4  13   3    8.74    5.73
  -4  13   3    7.55    4.91
  -3 -13   3    4.85    4.59
   3 -13  -3    2.40    4.08
  -3  13   3    4.76    4.72
  -3  13   3    4.04    4.66
   3  13  -3    1.17    3.86
  -2 -13   3   15.79    5.01
   2 -13  -3    4.87    4.70
  -2  13   3   10.95    5.05
   2  13  -3   14.53    4.80
  -2  13   3    7.00    4.72
  -1 -13   3    5.55    4.41
   1 -13  -3   20.01    5.14
  -1  13   3   15.51    4.67
   1  13  -3    6.61    4.63
  -1  13   3    7.58    5.03
   0 -13  -3   32.98    6.27
   0 -13   3   24.97    5.56
   0  13   3   34.93    6.37
   0  13  -3   33.91    6.15
  -1 -13  -3   -1.69    3.86
   1 -13   3   -0.95    3.74
  -1  13  -3    4.45    4.24
   1  13   3   -1.59    3.99
  -2 -13  -3    2.39    4.06
   2 -13   3   24.78    5.36
   2  13   3   18.16    4.91
  -2  13  -3   14.88    5.20
  -3 -13  -3    5.30    4.28
   3 -13   3    3.62    3.74
   3  13   3    1.52    4.26
  -3  13  -3   -0.48    4.26
  -4 -13  -3   10.48    4.98
   4  13   3    9.76    4.82
  -4  13  -3   -2.14    4.61
  -5 -13  -3   14.65    5.58
  -5  13  -3   30.59    6.36
  -5  13  -3   29.64    6.99
  -6 -13  -3    3.43    4.97
  -6  13  -3   10.97    5.84
  -6  13  -3   16.34    6.63
  -7 -13  -3    2.80    5.21
  -7  13  -3    2.37    5.75
  -7  13  -3   10.81    6.89
  -8 -13  -3    3.44    5.64
  -8  13  -3    1.53    6.84
  -8  13  -3   -1.01    5.99
  -9 -13  -3   30.11    7.54
  -9  13  -3   46.00   10.02
  -9  13  -3   37.26    8.27
 -10 -13  -3   27.45    7.54
 -10  13  -3   26.25    7.58
 -10  13  -3   19.20    9.29
  -9 -14   3   33.27    8.27
  -9  14   3   37.36   10.05
  -9  14   3   29.08    7.92
  -8 -14   3    5.64    6.83
  -8  14   3    5.40    7.19
  -8  14   3   22.34    7.52
  -7 -14   3    8.93    6.58
  -7  14   3    5.05    6.46
  -7  14   3    1.75    6.46
  -6 -14   3   13.42    6.25
  -6  14   3    4.77    5.67
  -6  14   3    5.27    6.32
  -5 -14   3   69.63    8.95
  -5  14   3   96.68   10.94
  -5  14   3   91.73    9.91
  -4 -14   3   30.10    6.31
  -4  14   3   38.25    7.21
  -4  14   3   50.55    7.91
  -3 -14   3    4.92    4.60
   3 -14  -3    0.67    4.50
  -3  14   3   -3.18    4.73
  -3  14   3    4.25    4.77
   3  14  -3    2.03    4.28
  -2 -14   3   24.89    5.80
   2 -14  -3   25.96    5.95
  -2  14   3   23.71    5.68
  -2  14   3   34.15    6.75
   2  14  -3   23.57    5.62
   1 -14  -3  412.27   17.92
  -1 -14   3  350.81   17.36
  -1  14   3  362.87   17.58
  -1  14   3  374.55   16.17
   1  14  -3  393.20   17.64
   0 -14  -3   69.73    8.13
   0 -14   3   82.91    8.64
   0  14  -3   63.95    7.88
   0  14   3   69.04    8.28
  -1 -14  -3   43.95    7.32
   1 -14   3   40.62    7.06
   1  14   3   47.07    7.13
  -1  14  -3   35.43    6.57
  -2 -14  -3  228.27   13.75
   2 -14   3  235.46   13.21
   2  14   3  251.45   13.64
  -2  14  -3  214.17   13.34
   3 -14   3  456.12   19.22
  -3 -14  -3  444.33   20.16
   3  14   3  476.69   19.69
  -3  14  -3  445.03   20.04
  -4 -14  -3   20.36    5.80
  -4  14  -3   29.28    6.36
  -4  14  -3   35.28    6.93
  -5 -14  -3   23.28    6.11
  -5  14  -3   58.50    8.07
  -5  14  -3   39.36    7.78
  -6 -14  -3  214.11   13.78
  -6  14  -3  198.60   14.64
  -6  14  -3  225.24   14.36
  -7 -14  -3   34.50    7.35
  -7  14  -3   38.76    8.63
  -7  14  -3   37.43    8.05
  -8 -14  -3    4.05    5.80
  -8  14  -3   10.09    7.73
  -8  14  -3   10.40    6.74
  -9 -14  -3    5.26    5.89
  -9  14  -3    4.83    8.11
  -9  14  -3    3.82    6.56
  -9 -15   3   40.37    9.17
  -9  15   3   34.49   10.39
  -9  15   3   41.84    9.08
  -8 -15   3   -4.61    6.47
  -8  15   3  -12.17    6.23
  -8  15   3   -4.15    7.08
  -7 -15   3   18.44    7.44
  -7  15   3    9.16    7.65
  -7  15   3   42.31    8.29
  -6 -15   3   17.65    6.59
  -6  15   3   14.32    7.34
  -6  15   3   13.19    6.39
  -5 -15   3    5.62    5.55
  -5  15   3   -2.51    5.39
  -5  15   3   -8.19    4.89
  -4 -15   3   21.78    6.34
  -4  15   3   30.32    7.38
  -4  15   3   16.88    6.58
  -3 -15   3   26.67    6.74
  -3  15   3   49.08    7.64
   3  15  -3   48.69    7.36
  -3  15   3   38.42    7.52
  -2 -15   3   16.75    5.75
   2 -15  -3    6.06    5.18
  -2  15   3   20.05    5.77
  -2  15   3   15.40    6.05
   2  15  -3   23.47    6.01
   1 -15  -3    6.29    4.83
  -1 -15   3    1.02    4.61
   1  15  -3    6.13    5.10
  -1  15   3   -2.64    5.05
  -1  15   3   -5.38    4.01
   0 -15   3   60.34    8.11
   0 -15  -3   50.68    7.89
   0  15   3   59.90    8.39
   0  15  -3   48.12    7.71
   1 -15   3  125.46   11.01
  -1 -15  -3  107.89   10.55
   1  15   3  138.98   11.49
  -1  15  -3  130.44   11.53
   2 -15   3   -1.07    4.14
  -2 -15  -3    5.21    5.27
   2  15   3    3.85    4.99
  -2  15  -3   -0.58    4.25
  -2  15  -3    2.28    5.00
  -3 -15  -3    2.63    4.81
   3 -15   3    4.82    4.64
  -3  15  -3    7.73    5.41
  -3  15  -3    9.05    5.25
   3  15   3    2.50    4.74
  -4 -15  -3   10.70    5.67
  -4  15  -3    6.84    5.43
  -4  15  -3    8.42    5.66
  -5 -15  -3  138.35   12.72
  -5  15  -3  155.29   12.93
  -5  15  -3  122.77   12.36
  -6 -15  -3    2.59    5.25
  -6  15  -3    2.99    5.82
  -6  15  -3   -9.42    5.20
  -7 -15  -3    0.91    5.09
  -7  15  -3    2.67    6.73
  -7  15  -3  -11.33    5.69
  -8 -15  -3   16.08    6.71
  -8  15  -3   21.84    8.56
  -8  15  -3   24.33    7.84
  -9 -15  -3   34.32    8.54
  -9  15  -3   27.08    9.61
  -9  15  -3   33.50    8.63
  -8 -16   3   24.69    8.23
  -8  16   3   37.97    9.66
  -8  16   3   26.94    8.44
  -7 -16   3   11.92    7.08
  -7  16   3   -5.26    6.35
  -7  16   3    4.67    7.32
  -6 -16   3    3.57    6.25
  -6  16   3   11.08    6.79
  -6  16   3   -1.12    6.45
  -5 -16   3   -1.32    5.42
  -5  16   3   -0.22    6.02
  -5  16   3   -0.47    5.65
  -4 -16   3   12.09    6.10
  -4  16   3    7.49    6.14
  -4  16   3   14.43    6.38
  -3 -16   3   14.32    6.20
  -3  16   3   20.49    6.64
  -3  16   3   15.88    6.27
   3  16  -3   14.88    5.83
   2 -16  -3    0.40    5.21
  -2 -16   3    2.58    5.35
   2  16  -3    7.76    5.23
  -2  16   3   11.42    5.60
  -2  16   3    0.13    5.37
  -1 -16   3   32.67    7.31
   1 -16  -3   27.03    6.96
  -1  16   3   22.61    6.73
   1  16  -3   23.73    6.63
  -1  16   3   29.51    6.00
   0 -16   3   38.38    7.24
   0 -16  -3   33.21    7.02
   0  16   3   51.45    8.19
   0  16  -3   59.18    8.49
  -1 -16  -3    6.74    5.29
   1 -16   3    2.59    5.05
  -1  16  -3   11.20    5.05
   1  16   3    8.73    5.80
  -1  16  -3    6.59    5.66
   2 -16   3   40.41    7.08
  -2 -16  -3   44.28    8.34
   2  16   3   45.21    7.71
  -2  16  -3   62.97    7.85
  -2  16  -3   53.37    8.48
   3 -16   3   24.30    6.35
  -3 -16  -3   24.86    6.42
   3  16   3   40.45    7.47
  -3  16  -3   25.45    6.95
  -3  16  -3   29.24    6.82
  -4 -16  -3   -0.53    4.84
  -4  16  -3    1.37    5.31
  -4  16  -3   -3.45    5.38
  -5 -16  -3   74.14    9.74
  -5  16  -3   62.21    9.08
  -5  16  -3   61.72    9.25
  -6 -16  -3   26.41    6.51
  -6  16  -3   15.25    7.47
  -6  16  -3   36.71    8.29
  -7 -16  -3   -3.99    4.52
  -7  16  -3   19.82    7.73
  -7  16  -3   17.31    7.85
  -8 -16  -3    0.52    5.45
  -8  16  -3   19.89    8.34
  -8  16  -3    9.03    7.75
  -8 -17   3   76.64   11.58
  -8  17   3   74.50   12.01
  -8  17   3  102.61   12.26
  -7 -17   3   11.19    7.68
  -7  17   3   20.24    8.09
  -7  17   3   15.06    7.46
  -6 -17   3    7.53    6.84
  -6  17   3    9.14    7.03
  -6  17   3   -8.26    6.00
  -5 -17   3    6.93    6.35
  -5  17   3    3.79    6.68
  -5  17   3    8.59    7.16
  -4 -17   3  125.98   12.43
  -4  17   3  101.17   11.46
  -4  17   3  133.61   12.58
  -3 -17   3  266.15   16.76
  -3  17   3  245.53   16.25
  -3  17   3  259.97   15.29
   2 -17  -3   59.39    8.50
  -2 -17   3   49.09    8.53
  -2  17   3   27.76    7.57
   2  17  -3   40.20    7.54
  -2  17   3   62.43    8.35
   1 -17  -3   24.84    7.39
  -1 -17   3   38.62    8.09
   1  17  -3   36.60    7.60
  -1  17   3   34.28    7.98
   0 -17  -3  275.36   16.50
   0 -17   3  271.62   16.21
   0  17  -3  275.26   16.41
   0  17   3  267.76   16.54
  -1 -17  -3  178.61   15.03
   1 -17   3  222.58   14.32
  -1  17  -3  176.11   14.09
   1  17   3  188.40   14.22
   2 -17   3    8.42    5.66
  -2 -17  -3   14.09    6.28
   2  17   3   10.44    6.20
  -2  17  -3   13.28    6.61
  -2  17  -3    4.26    5.03
  -3 -17  -3    1.27    5.62
   3  17   3    1.13    5.40
  -3  17  -3    4.71    5.18
  -3  17  -3    2.80    5.95
  -4 -17  -3   44.55    8.05
  -4  17  -3   53.15    8.64
  -4  17  -3   49.39    9.04
  -5 -17  -3   21.29    7.28
  -5  17  -3    6.65    6.30
  -5  17  -3   13.84    6.84
  -6 -17  -3    3.35    5.53
  -6  17  -3   -4.78    6.23
  -6  17  -3   -0.02    6.41
  -7 -17  -3   -2.35    5.42
  -7  17  -3   -1.56    6.59
  -7  17  -3   -1.99    6.55
  -8 -17  -3   52.27    9.31
  -8  17  -3   57.33   10.10
  -8  17  -3   38.07    9.87
  -7 -18   3    9.87    7.47
  -7  18   3    5.71    7.83
  -7  18   3    4.82    7.32
  -6 -18   3  -11.85    5.64
  -6  18   3    3.75    6.74
  -6  18   3   -6.64    6.82
  -5 -18   3   24.31    7.97
  -5  18   3   33.54    8.80
  -5  18   3   28.06    8.31
  -4 -18   3    8.22    6.69
  -4  18   3    6.31    6.82
  -4  18   3    0.16    6.39
  -3 -18   3   17.79    6.89
  -3  18   3   19.97    6.74
  -3  18   3    5.21    6.83
  -2 -18   3   64.24   10.27
   2 -18  -3   42.29    8.56
   2  18  -3   64.99    9.55
  -2  18   3   47.36    9.24
   1 -18  -3   37.42    8.11
  -1 -18   3   41.31    8.82
   1  18  -3   33.36    7.72
  -1  18   3   32.86    8.32
   0 -18  -3    0.58    6.28
   0 -18   3    7.42    5.71
   0  18   3   15.79    6.94
   0  18  -3    1.30    6.15
  -1 -18  -3    3.76    5.81
   1 -18   3    5.43    5.47
   1  18   3   -0.60    6.04
  -1  18  -3    3.57    6.30
   2 -18   3   13.41    6.72
  -2 -18  -3   21.32    7.37
   2  18   3   19.74    6.85
  -2  18  -3   17.55    7.31
  -3 -18  -3   48.50    9.30
  -3  18  -3   47.13    8.90
   3  18   3   41.80    9.37
  -3  18  -3   62.53    8.98
  -4 -18  -3   13.24    6.91
  -4  18  -3   12.86    7.41
  -4  18  -3   11.00    6.62
  -5 -18  -3    4.11    6.19
  -5  18  -3   18.07    7.35
  -5  18  -3    0.12    6.23
  -6 -18  -3   82.22   11.22
  -6  18  -3   92.30   11.77
  -6  18  -3   62.08   10.36
  -7 -18  -3   44.92    9.37
  -7  18  -3   48.75   10.46
  -7  18  -3   81.19   11.25
  -7 -19   3  -11.01    6.68
  -7  19   3  -11.16    6.69
  -7  19   3   10.85    8.06
  -6 -19   3    5.52    7.35
  -6  19   3    1.54    6.89
  -6  19   3  -11.60    6.38
  -5 -19   3    5.98    7.14
  -5  19   3    2.20    6.83
  -5  19   3   -3.11    6.75
  -4 -19   3   13.65    7.43
  -4  19   3    6.56    7.44
  -4  19   3   19.00    7.59
  -3 -19   3   20.79    7.59
  -3  19   3   22.42    7.91
  -2 -19   3    3.94    7.02
  -2  19   3    1.11    6.52
   2  19  -3  -15.94    5.12
  -1 -19   3    4.66    6.76
   1 -19  -3    1.50    6.24
   1  19  -3    3.28    6.50
  -1  19   3   13.10    7.23
   0 -19   3   -3.93    5.51
   0 -19  -3   11.69    6.58
   0  19   3   -1.02    6.20
   0  19  -3    4.28    6.63
   1 -19   3    4.15    6.34
  -1 -19  -3    6.08    6.44
  -1  19  -3   -1.86    6.02
   1  19   3   -5.55    6.23
   2 -19   3   -0.76    5.73
  -2 -19  -3   -3.28    6.42
   2  19   3    1.69    6.33
  -2  19  -3    2.47    6.81
  -3 -19  -3   -3.38    6.30
  -3  19  -3    2.85    7.08
  -3  19  -3    8.42    5.92
  -4 -19  -3   -9.36    5.30
  -4  19  -3    7.66    6.34
  -4  19  -3    2.14    6.87
  -5 -19  -3   -1.36    6.50
  -5  19  -3    2.17    6.55
  -5  19  -3   -0.72    7.07
  -6 -19  -3   -0.47    6.16
  -6  19  -3    3.06    7.34
  -6  19  -3    7.56    7.77
  -7 -19  -3   -1.31    6.23
  -7  19  -3    5.08    7.80
  -7  19  -3    0.61    6.85
  -6 -20   3  102.02   13.50
  -6  20   3   73.94   11.94
  -6  20   3   87.74   12.44
  -5 -20   3   37.57    9.32
  -5  20   3   35.07    8.91
  -5  20   3   43.12    9.94
  -4 -20   3   28.57    9.43
  -4  20   3   19.98    8.53
  -3 -20   3   32.42    9.44
  -3  20   3   19.14    8.41
  -2 -20   3  151.21   14.71
  -2  20   3  167.22   15.65
   2  20  -3  180.15   15.20
  -1 -20   3   38.88    9.91
   1 -20  -3   29.01    8.06
  -1  20   3   26.95    8.58
   1  20  -3   35.27    9.00
   0 -20  -3    9.00    7.03
   0 -20   3    1.99    6.96
   0  20  -3   13.82    7.37
   0  20   3    6.82    7.41
  -1 -20  -3    3.69    6.50
   1 -20   3   -1.36    5.97
   1  20   3    6.22    7.41
  -1  20  -3   13.33    7.76
  -2 -20  -3  171.77   16.72
   2  20   3  163.92   15.14
  -2  20  -3  173.03   15.74
  -3 -20  -3   71.70   10.95
  -3  20  -3   70.84   11.25
  -4 -20  -3    5.83    7.12
  -4  20  -3    2.88    6.36
  -4  20  -3   -2.60    6.88
  -5 -20  -3    5.38    7.47
  -5  20  -3    6.08    7.07
  -5  20  -3   12.36    7.71
  -6 -20  -3   42.38    9.57
  -6  20  -3   42.22    9.71
  -6  20  -3   35.78    9.85
  -5 -21   3   30.17   10.36
  -5  21   3   15.92    8.65
  -4 -21   3   42.97   10.27
  -4  21   3   19.99    9.63
  -3 -21   3   87.24   13.40
  -3  21   3   76.70   12.32
  -2 -21   3    8.88    7.55
  -2  21   3    2.51    8.01
  -1 -21   3  -11.24    6.33
   1 -21  -3    2.99    7.50
   1  21  -3   -6.39    7.05
  -1  21   3   -6.59    7.61
   0 -21  -3   10.73    7.63
   0 -21   3   12.30    7.96
   0  21   3    7.78    8.03
   0  21  -3    0.73    7.46
   1 -21   3   32.73    9.47
  -1 -21  -3   38.98   10.29
  -1  21  -3   48.70   10.26
   1  21   3   37.63   10.04
  -2 -21  -3   -0.86    7.22
  -2  21  -3   11.36    8.47
   2  21   3    4.65    7.37
  -3 -21  -3   29.92    9.89
  -3  21  -3   26.18    9.44
  -4 -21  -3   54.81   10.98
  -4  21  -3   47.69   10.84
  -5 -21  -3    6.43    8.67
  -5  21  -3   20.84    9.11
  -5  21  -3    6.58    7.10
  -4 -22   3    3.02    9.23
  -4  22   3   -0.30    8.33
  -3 -22   3   18.25    9.57
  -3  22   3   -7.77    8.35
  -2 -22   3   21.75   10.41
  -2  22   3    8.06    8.54
  -1 -22   3   30.88   10.57
   1  22  -3   28.60    9.50
  -1  22   3   17.99    9.10
   0 -22  -3   -5.11    7.64
   0 -22   3    1.92    6.94
   0  22  -3   15.86    8.09
   0  22   3    4.86    8.32
  -1 -22  -3   -2.22    8.11
   1 -22   3    0.26    7.00
  -1  22  -3    8.06    8.04
   1  22   3   -4.93    7.60
  -2 -22  -3   11.50    8.29
  -2  22  -3   40.91   10.27
  -3 -22  -3   12.08    9.01
  -3  22  -3    5.21    8.58
  -4 -22  -3    2.58    8.08
  -4  22  -3    7.49    8.70
  -2 -23   3    5.15    8.83
  -2  23   3   -5.59    8.55
  -1 -23   3    2.11    8.24
  -1  23   3   11.81    9.28
   1  23  -3    0.56    7.97
   0 -23  -3   85.08   13.23
   0 -23   3  103.51   14.75
   0  23   3   96.59   14.19
   0  23  -3   71.26   12.69
  -1 -23  -3   56.45   12.88
   1  23   3   52.70   11.40
  -1  23  -3   71.18   12.35
  -2 -23  -3   -4.61    8.89
  -2  23  -3   22.69    9.91
 -12   0   4    6.20    7.43
 -11   0   4   -0.66    6.65
 -10   0   4  159.63   14.22
  -9   0   4   59.58    9.26
  -8   0   4    1.26    5.05
  -7   0   4  148.76   10.54
  -6   0   4  585.67   22.57
  -5   0   4    6.07    3.89
  -5   0   4    5.52    1.93
  -4   0   4  224.06    8.32
  -4   0   4  222.77   10.68
  -4   0   4  231.47    8.43
  -4   0   4  229.47    8.39
  -3   0   4   50.52    3.85
  -3   0   4   49.68    4.01
  -3   0   4   54.91    4.19
  -2   0   4   57.09    4.28
  -2   0   4   55.22    4.33
   2   0  -4   51.67    4.02
  -2   0   4   58.83    4.20
  -1   0   4   16.40    2.93
  -1   0   4   15.93    2.80
   1   0  -4   21.12    2.87
  -1   0   4   14.32    2.78
   0   0   4  218.34    8.73
   0   0  -4  210.82    8.59
  -1   0  -4  115.52    6.10
   1   0   4  116.40    6.16
  -2   0  -4  195.04    8.62
   2   0   4  214.12    8.60
  -2   0  -4  220.44    8.84
  -2   0  -4  207.93    8.76
  -3   0  -4    0.45    2.39
  -3   0  -4    6.08    2.48
   3   0   4    7.08    2.33
  -3   0  -4    2.89    2.31
  -4   0  -4  274.22   10.98
  -4   0  -4  283.75   11.09
   4   0   4  274.57    9.92
  -4   0  -4  297.60   11.06
  -5   0  -4  852.93   27.74
  -5   0  -4  845.90   27.74
  -5   0  -4  857.21   27.11
  -6   0  -4  215.35    9.97
  -6   0  -4  238.79   10.13
  -6   0  -4  235.16   10.04
  -7   0  -4   10.84    3.38
  -7   0  -4    8.50    3.33
  -7   0  -4   14.00    3.36
  -8   0  -4   89.87    7.15
  -8   0  -4   84.90    7.00
  -8   0  -4   91.70    6.82
  -9   0  -4  215.02   10.42
  -9   0  -4  189.76   10.53
  -9   0  -4  207.83   10.97
  -9   0  -4  205.30   14.26
 -10   0  -4   39.20    6.38
 -10   0  -4   42.35    8.78
 -10   0  -4   45.53    6.20
 -11   0  -4    9.11    5.60
 -11   0  -4    6.01    7.09
 -11   0  -4   10.78    5.21
 -12   1   4   48.30   10.52
 -11  -1   4    9.71    7.25
 -11   1   4    8.31    8.11
 -10  -1   4   57.96    9.58
 -10   1   4   41.77    9.15
  -9  -1   4    9.02    6.53
  -9   1   4   12.07    6.88
  -8  -1   4   -1.27    4.67
  -8   1   4    4.57    5.54
  -7  -1   4   10.67    5.08
  -7   1   4   13.45    5.30
  -6  -1   4  133.99    9.18
  -6  -1   4  123.00    5.48
  -6   1   4  102.39    9.09
  -5  -1   4  465.78   14.34
  -5  -1   4  428.12   14.33
  -5  -1   4  452.79   17.34
  -5  -1   4  476.04   14.52
  -5   1   4  439.38   14.13
  -5   1   4  384.73   17.29
  -5   1   4  421.32   14.28
  -4  -1   4    0.73    1.92
  -4  -1   4    0.32    1.86
  -4  -1   4   -0.32    1.77
  -4   1   4    0.06    1.68
  -4   1   4    0.02    1.90
  -4   1   4    0.94    1.85
  -4   1   4    2.35    3.41
  -3  -1   4   29.73    3.11
  -3  -1   4   29.59    3.09
  -3  -1   4   28.44    2.90
  -3   1   4   25.95    4.47
  -3   1   4   25.30    2.76
  -3   1   4   24.20    2.84
  -3   1   4   19.46    2.85
  -2  -1   4   35.83    3.52
   2  -1  -4   42.70    3.35
  -2  -1   4   36.65    3.37
  -2  -1   4   30.63    3.33
  -2   1   4   45.46    3.66
   2   1  -4   37.18    3.35
  -2   1   4   36.08    3.45
  -2   1   4   36.25    3.50
  -1  -1   4   43.48    3.86
  -1  -1   4   45.42    3.84
  -1  -1   4   47.41    3.92
   1  -1  -4   46.21    3.73
   1   1  -4   48.57    3.91
  -1   1   4   40.58    3.54
  -1   1   4   49.00    3.97
  -1   1   4   51.47    4.24
   0  -1   4  203.87    8.55
   0  -1  -4  221.65    8.66
   0   1  -4  205.60    8.56
   0   1   4  209.39    8.57
  -1  -1  -4    0.74    2.44
   1  -1   4    4.07    2.55
  -1   1  -4    3.22    2.29
   1   1   4    3.80    2.53
  -2  -1  -4   60.24    4.62
  -2  -1  -4   55.73    4.69
   2  -1   4   63.24    4.78
  -2  -1  -4   60.23    4.73
  -2   1  -4   72.18    4.95
  -2   1  -4   66.78    4.94
  -2   1  -4   61.51    4.57
   2   1   4   55.45    4.33
  -3  -1  -4   34.42    3.83
   3  -1   4   33.73    3.46
  -3  -1  -4   37.71    4.05
  -3  -1  -4   29.73    3.28
  -3   1  -4   42.53    4.05
  -3   1  -4   40.49    3.82
  -3   1  -4   34.81    3.56
   3   1   4   35.80    3.62
  -4  -1  -4   58.54    4.94
  -4  -1  -4   60.66    4.88
  -4  -1  -4   54.01    4.56
   4  -1   4   50.07    3.86
  -4   1  -4   47.40    4.51
  -4   1  -4   63.07    4.92
  -4   1  -4   59.23    4.86
   4   1   4   51.05    3.92
  -5  -1  -4   -0.60    2.37
  -5  -1  -4   -0.52    2.43
  -5  -1  -4    1.25    2.34
  -5   1  -4   -0.86    2.35
  -5   1  -4    0.85    2.37
  -5   1  -4    1.34    2.46
  -6  -1  -4   -2.15    2.60
  -6  -1  -4    1.63    2.55
  -6  -1  -4    0.41    2.59
  -6   1  -4    0.37    2.44
  -6   1  -4    6.32    2.82
  -6   1  -4   -1.15    2.50
  -7  -1  -4    4.57    3.11
  -7  -1  -4    9.36    3.31
  -7  -1  -4    6.47    3.16
  -7   1  -4    7.81    3.20
  -7   1  -4    6.42    3.29
  -7   1  -4    9.18    3.24
  -8  -1  -4   -0.88    3.17
  -8  -1  -4    2.58    3.33
  -8  -1  -4    5.49    3.38
  -8   1  -4   -1.31    2.98
  -8   1  -4    6.62    3.58
  -8   1  -4    4.31    3.44
  -9  -1  -4    0.09    3.70
  -9  -1  -4    8.61    4.25
  -9  -1  -4    1.93    5.49
  -9  -1  -4    6.32    3.54
  -9   1  -4    5.34    3.31
  -9   1  -4    4.93    3.96
  -9   1  -4    4.05    3.66
  -9   1  -4    9.24    5.95
 -10  -1  -4  124.72    9.78
 -10  -1  -4  117.88    9.32
 -10  -1  -4  112.48   12.31
 -10   1  -4  127.21   13.53
 -10   1  -4  124.28    9.24
 -10   1  -4  127.51    9.46
 -11  -1  -4   11.39    5.86
 -11  -1  -4    4.43    6.74
 -11  -1  -4    9.41    5.18
 -11   1  -4    7.76    7.76
 -11   1  -4    7.02    5.60
 -11   1  -4   10.94    5.07
 -12   2   4    2.44    8.49
 -11   2   4   -2.05    7.17
 -10  -2   4   13.96    6.69
 -10   2   4   12.27    7.57
  -9  -2   4  133.69   11.65
  -9   2   4  122.69   12.27
  -8  -2   4  138.11   10.64
  -8   2   4  174.18   12.57
  -7  -2   4  110.29    5.57
  -7  -2   4  102.02    9.11
  -7   2   4  112.83   10.43
  -6  -2   4   70.48    4.54
  -6  -2   4   65.43    4.38
  -6  -2   4   77.53    7.21
  -6  -2   4   70.20    4.43
  -6   2   4   75.18    8.16
  -6   2   4   77.56    4.33
  -5  -2   4   20.78    2.73
  -5  -2   4   25.74    2.81
  -5  -2   4   17.45    2.60
  -5   2   4   28.63    5.26
  -5   2   4   23.74    2.80
  -5   2   4   23.42    2.65
  -5   2   4   22.55    2.76
  -4  -2   4  167.57    7.27
  -4  -2   4  173.22    7.31
  -4  -2   4  173.51    7.19
  -4   2   4  183.69    7.17
  -4   2   4  181.95    9.88
  -4   2   4  173.21    7.19
  -4   2   4  181.14    7.27
  -3  -2   4   54.35    4.21
  -3  -2   4   60.48    4.39
  -3  -2   4   56.58    4.30
  -3   2   4   57.40    4.16
  -3   2   4   54.52    5.55
   3   2  -4   56.22    3.63
  -3   2   4   54.52    4.18
  -3   2   4   55.70    4.28
  -2  -2   4   41.11    3.82
  -2  -2   4   30.95    3.34
  -2  -2   4   31.12    3.37
   2  -2  -4   41.31    3.40
  -2   2   4   43.65    3.83
  -2   2   4   35.68    3.36
   2   2  -4   36.05    3.40
  -2   2   4   42.06    3.81
   1  -2  -4    4.24    2.34
  -1  -2   4    0.42    2.25
  -1  -2   4    0.61    2.35
  -1  -2   4   -1.16    2.29
  -1   2   4    1.61    2.19
  -1   2   4    4.31    2.44
   1   2  -4   -1.60    2.26
   0  -2   4  112.62    6.29
   0  -2  -4  119.69    6.39
   0   2  -4  115.75    6.41
   0   2   4  121.68    6.36
   1  -2   4    5.19    2.55
  -1  -2  -4    4.92    2.73
   1   2   4    6.13    2.50
  -1   2  -4    5.39    2.60
  -2  -2  -4   17.40    3.09
  -2  -2  -4   14.85    3.07
  -2  -2  -4   17.49    3.04
   2  -2   4   16.48    2.92
  -2   2  -4   16.54    3.02
  -2   2  -4   14.99    3.11
  -2   2  -4   15.79    3.03
   2   2   4   15.79    3.05
   3  -2   4   16.75    2.88
  -3  -2  -4   20.53    3.42
  -3  -2  -4   19.63    3.27
  -3  -2  -4   20.48    3.29
   3   2   4   19.03    2.93
  -3   2  -4   20.16    2.90
  -3   2  -4   24.40    3.46
  -3   2  -4   19.02    3.13
  -4  -2  -4    0.18    2.28
   4  -2   4    3.20    1.98
  -4  -2  -4    1.59    2.37
  -4  -2  -4   -0.09    2.15
   4   2   4    1.36    1.98
  -4   2  -4    1.89    2.44
  -4   2  -4    4.11    2.44
  -5  -2  -4  104.43    6.52
  -5  -2  -4   99.21    6.35
  -5  -2  -4   99.10    6.51
  -5   2  -4  107.83    6.43
  -5   2  -4  118.46    6.46
  -5   2  -4  112.87    6.55
  -6  -2  -4    6.01    3.06
  -6  -2  -4    6.98    3.03
  -6  -2  -4    8.45    3.06
  -6   2  -4    6.12    2.94
  -6   2  -4    4.15    2.96
  -6   2  -4    6.40    2.90
  -7  -2  -4   14.53    3.77
  -7  -2  -4   10.50    3.39
  -7  -2  -4   14.69    3.54
  -7   2  -4   15.64    3.54
  -7   2  -4    8.51    3.30
  -7   2  -4    9.81    3.30
  -8  -2  -4   56.24    5.65
  -8  -2  -4   53.09    5.91
  -8  -2  -4   45.53    5.39
  -8   2  -4   47.51    5.45
  -8   2  -4   50.73    5.61
  -8   2  -4   55.68    5.74
  -9  -2  -4   22.30    4.90
  -9  -2  -4   26.93    5.03
  -9  -2  -4   20.82    6.22
  -9  -2  -4   25.82    4.72
  -9   2  -4   28.13    4.78
  -9   2  -4   19.95    4.58
  -9   2  -4   25.13    4.96
  -9   2  -4   27.43    7.69
 -10  -2  -4    1.93    5.64
 -10  -2  -4    1.72    4.36
 -10  -2  -4   -5.42    4.38
 -10   2  -4   -4.07    6.70
 -10   2  -4   -7.65    4.31
 -10   2  -4   -1.53    4.11
 -11  -2  -4   -3.26    5.49
 -11  -2  -4    8.86    5.33
 -11   2  -4    1.85    4.72
 -11   2  -4   10.32    7.94
 -11   2  -4   11.95    5.76
 -12   3   4   41.77   11.21
 -11   3   4    1.38    7.54
 -10  -3   4   24.19    6.74
 -10   3   4   17.13    7.91
  -9  -3   4   25.53    6.64
  -9   3   4   35.77    8.40
  -8  -3   4  129.80   10.00
  -8  -3   4  127.13    6.37
  -8   3   4  134.47   12.43
  -7  -3   4   13.98    4.75
  -7  -3   4    9.16    2.67
  -7  -3   4   13.76    2.82
  -7   3   4   17.73    2.75
  -7   3   4    6.35    5.38
  -6  -3   4   84.61    5.16
  -6  -3   4   91.38    5.31
  -6  -3   4   74.50    4.99
  -6   3   4   71.84    4.81
  -6   3   4   88.07    5.04
  -6   3   4   93.75    8.93
  -6   3   4   86.86    5.11
  -5  -3   4  155.44    6.90
  -5  -3   4  152.78    6.98
  -5  -3   4  144.29    6.79
  -5   3   4  146.76    6.67
  -5   3   4  154.97    6.75
  -5   3   4  146.00    9.55
  -5   3   4  144.50    6.61
  -4  -3   4  245.52    9.41
  -4  -3   4  218.03    9.10
  -4  -3   4  235.39    9.38
  -4   3   4  240.36    9.22
  -4   3   4  234.84    9.19
  -4   3   4  258.51   11.89
  -4   3   4  246.97    9.24
  -3  -3   4  237.53    9.37
  -3  -3   4  243.69    9.48
   3  -3  -4  239.52    8.52
  -3  -3   4  249.68    9.59
   3   3  -4  242.57    8.71
  -3   3   4  233.34    9.43
  -3   3   4  250.88   11.21
  -3   3   4  231.69    9.22
  -3   3   4  236.11    9.39
  -2  -3   4  308.88   11.11
  -2  -3   4  293.99   10.94
  -2  -3   4  302.38   11.08
   2  -3  -4  272.39   10.39
   2   3  -4  288.02   10.49
  -2   3   4  286.19   10.89
  -2   3   4  278.33   10.75
  -2   3   4  276.97   10.90
   1  -3  -4  169.28    7.78
  -1  -3   4  192.00    8.11
  -1  -3   4  204.29    8.42
   1   3  -4  186.03    7.87
  -1   3   4  159.53    7.88
  -1   3   4  168.83    7.94
  -1   3   4  158.84    7.92
   0  -3  -4  414.43   14.57
   0  -3   4  409.10   14.59
   0   3  -4  396.73   14.48
   0   3   4  442.20   14.61
   1  -3   4    5.20    2.67
  -1  -3  -4    4.44    2.69
   1   3   4    3.18    2.60
  -1   3  -4    6.68    2.92
  -2  -3  -4  244.74   10.36
   2  -3   4  249.16   10.04
  -2  -3  -4  248.55   10.32
  -2  -3  -4  264.37   10.42
  -2   3  -4  260.38   10.38
   2   3   4  260.85   10.10
  -2   3  -4  268.33   10.43
  -3  -3  -4  856.70   27.74
   3  -3   4  832.07   26.50
  -3  -3  -4  844.39   27.80
  -3  -3  -4  869.21   27.31
  -3   3  -4  865.35   27.68
   3   3   4  836.07   26.57
  -3   3  -4  867.04   27.18
  -4  -3  -4  266.55   10.94
  -4  -3  -4  264.76   10.95
   4  -3   4  268.85    9.82
  -4  -3  -4  273.01   10.99
   4   3   4  265.28    9.95
  -4   3  -4  257.65   10.74
  -4   3  -4  247.15   10.70
  -5  -3  -4   31.63    4.08
  -5  -3  -4   36.19    4.36
  -5  -3  -4   36.87    4.29
  -5   3  -4   37.54    4.44
  -5   3  -4   44.97    4.68
  -6  -3  -4  126.99    7.42
  -6  -3  -4  120.27    7.35
  -6  -3  -4  112.81    7.27
  -6   3  -4  106.50    7.07
  -6   3  -4  123.57    7.20
  -7  -3  -4  225.79   10.68
  -7  -3  -4  213.90   10.74
  -7  -3  -4  230.88   10.90
  -7   3  -4  237.14   10.69
  -7   3  -4  237.92   10.80
  -8  -3  -4   11.78    3.93
  -8  -3  -4   16.87    4.45
  -8  -3  -4   11.47    3.75
  -8   3  -4    8.45    3.84
  -8   3  -4   19.66    4.19
  -8   3  -4   18.14    4.09
  -9  -3  -4   40.61    5.89
  -9  -3  -4   39.20    6.20
  -9  -3  -4   55.12    7.70
  -9  -3  -4   44.89    5.66
  -9   3  -4   45.85    5.65
  -9   3  -4   50.12    9.18
  -9   3  -4   45.93    6.02
  -9   3  -4   49.34    5.97
 -10  -3  -4   49.79    7.14
 -10  -3  -4   51.75    6.87
 -10   3  -4   57.11    6.98
 -10   3  -4   45.85    9.68
 -10   3  -4   56.17    7.05
 -11  -3  -4   16.31    5.98
 -11  -3  -4   15.49    6.18
 -11   3  -4   13.79    5.47
 -11   3  -4   18.52    8.96
 -11   3  -4   17.99    6.10
 -11   4   4   63.71   11.99
 -10   4   4   21.18    8.51
  -9  -4   4    2.95    3.51
  -9   4   4    3.79    6.75
  -8  -4   4   25.88    3.68
  -8  -4   4   36.49    4.25
  -8   4   4   31.64    3.61
  -8   4   4   31.30    7.55
  -7  -4   4   62.30    5.06
  -7  -4   4   64.99    5.11
  -7   4   4   65.35    8.92
  -7   4   4   61.45    5.12
  -7   4   4   74.16    5.04
  -7   4   4   51.98    4.51
  -6  -4   4   72.89    5.27
  -6  -4   4   72.91    5.36
  -6   4   4   68.58    5.15
  -6   4   4   76.59    8.45
  -6   4   4   77.50    5.39
  -6   4   4   72.09    5.20
  -5  -4   4   21.35    3.39
  -5  -4   4   14.15    3.00
  -5   4   4   12.82    4.97
  -5   4   4   12.87    2.80
  -5   4   4   14.41    3.07
  -5   4   4   13.92    2.97
  -4  -4   4   25.82    3.56
  -4  -4   4   24.63    3.23
  -4   4   4   20.45    3.35
  -4   4   4   24.69    3.49
  -4   4   4   20.57    4.87
  -4   4   4   22.68    3.15
  -3  -4   4  964.56   30.32
  -3  -4   4  989.48   31.06
   3  -4  -4  988.54   29.39
  -3   4   4  971.96   30.19
   3   4  -4  976.39   29.59
  -3   4   4  933.24   32.43
  -3   4   4  989.03   31.02
  -3   4   4  991.98   31.01
  -2  -4   4  145.20    7.28
   2  -4  -4  148.86    6.98
  -2  -4   4  142.92    7.22
  -2   4   4  145.35    7.31
  -2   4   4  143.29    7.18
   2   4  -4  146.95    7.10
  -2   4   4  148.47    8.37
  -2   4   4  146.21    7.27
  -1  -4   4   39.11    4.40
  -1  -4   4   30.54    4.01
   1  -4  -4   33.54    3.85
  -1   4   4   35.81    4.17
  -1   4   4   37.59    4.46
   1   4  -4   32.91    3.88
  -1   4   4   34.56    4.13
   0  -4  -4  118.51    6.87
   0  -4   4  122.29    6.78
   0   4  -4  134.21    6.96
   0   4   4  113.71    6.91
   1  -4   4   83.16    5.82
   1   4   4   82.57    5.84
  -1   4  -4   78.58    5.90
  -2  -4  -4  104.94    6.59
  -2  -4  -4  125.61    7.88
   2  -4   4  107.37    6.37
  -2   4  -4  100.06    6.35
   2   4   4  105.31    6.45
  -2   4  -4  114.68    6.70
  -3  -4  -4  106.94    6.21
  -3  -4  -4  102.39    6.27
  -3  -4  -4  108.95    6.53
   3  -4   4   94.28    5.84
  -3   4  -4   89.11    6.33
  -3   4  -4  102.09    6.26
   3   4   4   91.83    5.81
   4  -4   4   36.69    3.63
  -4  -4  -4   31.97    4.18
  -4  -4  -4   40.16    4.60
  -4  -4  -4   29.05    3.84
   4   4   4   28.03    3.48
  -4   4  -4   27.06    3.98
  -4   4  -4   32.68    4.14
  -5  -4  -4   65.99    5.79
  -5  -4  -4   59.09    5.39
  -5  -4  -4   65.11    5.78
  -5   4  -4   66.77    5.83
  -5   4  -4   67.41    5.55
  -6  -4  -4    4.21    3.21
  -6  -4  -4    2.56    2.88
  -6   4  -4    0.36    2.67
  -6   4  -4    3.34    3.03
  -7  -4  -4   45.04    5.63
  -7  -4  -4   47.11    5.55
  -7  -4  -4   51.58    5.64
  -7   4  -4   47.75    5.48
  -7   4  -4   55.65    5.83
  -8  -4  -4   60.20    7.18
  -8  -4  -4   60.05    6.38
  -8  -4  -4   45.92    5.76
  -8  -4  -4   60.09    6.46
  -8   4  -4   43.39    5.88
  -8   4  -4   45.68    5.58
  -9  -4  -4    7.05    4.36
  -9  -4  -4    0.30    4.40
  -9  -4  -4   -9.30    3.34
  -9   4  -4    0.39    4.03
  -9   4  -4    8.86    7.34
  -9   4  -4    3.48    4.35
  -9   4  -4    5.65    3.84
 -10  -4  -4   -5.85    4.98
 -10  -4  -4   -2.80    4.40
 -10  -4  -4   -0.15    3.86
 -10   4  -4    2.15    7.16
 -10   4  -4    4.28    4.82
 -10   4  -4    0.56    4.42
 -11  -4  -4   -4.79    4.69
 -11  -4  -4    9.42    5.97
 -11   4  -4   -7.23    7.34
 -11   4  -4    6.55    5.49
 -11   4  -4    3.45    5.53
 -11   5   4    6.35    8.93
 -10  -5   4   -6.64    3.95
 -10   5   4    4.43    7.70
  -9  -5   4    2.43    3.74
  -9   5   4    2.85    3.54
  -9   5   4    5.25    3.68
  -9   5   4   14.42    7.42
  -8  -5   4   18.06    3.67
  -8  -5   4   17.55    4.05
  -8   5   4   16.31    3.44
  -8   5   4   10.39    6.57
  -8   5   4   20.29    3.87
  -8   5   4   18.03    3.69
  -7  -5   4   80.25    6.36
  -7  -5   4   89.69    6.40
  -7   5   4   90.35    9.92
  -7   5   4   88.73    6.33
  -7   5   4   83.02    6.12
  -7   5   4   81.43    5.92
  -6  -5   4  236.61   10.09
  -6  -5   4  221.50   10.01
  -6   5   4  221.87   12.98
  -6   5   4  233.78    9.83
  -6   5   4  237.47    9.88
  -6   5   4  234.52    9.82
  -5  -5   4   47.57    4.60
  -5  -5   4   50.60    4.78
  -5   5   4   58.43    7.26
  -5   5   4   47.09    4.59
  -5   5   4   48.26    4.44
  -5   5   4   46.72    4.54
  -4  -5   4    7.82    3.04
  -4  -5   4   10.37    2.98
  -4   5   4   11.71    3.01
  -4   5   4   17.59    3.48
  -4   5   4   16.36    3.29
   4   5  -4    8.23    2.08
  -4   5   4   17.60    4.83
  -3  -5   4   26.56    3.39
   3  -5  -4   25.13    3.14
  -3  -5   4   25.94    3.76
  -3   5   4   26.89    3.56
  -3   5   4   19.68    3.43
   3   5  -4   19.20    3.13
  -3   5   4   25.15    3.88
  -3   5   4   25.24    4.80
   2  -5  -4 1148.63   36.07
  -2  -5   4 1179.95   37.52
  -2  -5   4 1210.69   36.67
  -2   5   4 1171.27   37.42
  -2   5   4 1188.33   37.51
  -2   5   4 1208.65   38.23
  -2   5   4 1163.31   36.48
   2   5  -4 1215.86   36.23
  -1  -5   4  153.17    7.95
   1  -5  -4  156.26    7.77
  -1  -5   4  171.79    8.41
   1   5  -4  156.02    7.78
  -1   5   4  147.34    8.05
  -1   5   4  153.85    8.00
   0  -5   4   85.13    6.35
   0   5  -4   74.07    5.71
   0   5   4   82.11    6.12
   1  -5   4  357.26   13.64
  -1  -5  -4  378.75   13.91
  -1   5  -4  359.12   13.71
   1   5   4  369.75   13.75
   2  -5   4   16.56    3.36
  -2  -5  -4   14.20    3.42
  -2  -5  -4   10.06    2.95
  -2  -5  -4   10.22    3.18
  -2   5  -4   21.29    3.54
   2   5   4   11.05    3.18
  -2   5  -4   15.48    3.34
   3  -5   4  456.80   15.51
  -3  -5  -4  426.37   16.02
  -3  -5  -4  431.55   16.11
  -3  -5  -4  424.88   16.18
  -3   5  -4  439.82   16.05
  -3   5  -4  442.74   15.99
   3   5   4  424.60   15.46
  -4  -5  -4   49.71    5.30
   4  -5   4   50.85    4.43
  -4  -5  -4   67.37    6.34
  -4  -5  -4   49.53    5.20
   4   5   4   56.95    4.76
  -4   5  -4   51.85    4.92
  -4   5  -4   53.87    5.37
  -5  -5  -4   15.46    3.60
  -5  -5  -4   17.65    3.89
  -5  -5  -4   16.34    3.76
  -5   5  -4   18.15    3.93
  -5   5  -4   21.35    3.83
  -6  -5  -4   42.40    5.05
  -6  -5  -4   50.26    5.37
  -6  -5  -4   44.45    5.37
  -6   5  -4   55.48    5.62
  -6   5  -4   53.59    5.68
  -7  -5  -4    7.05    3.91
  -7  -5  -4   -0.53    2.95
  -7   5  -4    7.49    3.84
  -7   5  -4    0.71    3.41
  -8  -5  -4   55.13    6.81
  -8  -5  -4   69.29    7.02
  -8  -5  -4   74.58    7.33
  -8  -5  -4   73.82    7.40
  -8   5  -4   59.49    6.30
  -8   5  -4   72.28    7.09
  -9  -5  -4   44.01    6.17
  -9  -5  -4   57.42    6.98
  -9  -5  -4   39.93    6.10
  -9   5  -4   42.25    8.98
  -9   5  -4   53.48    6.75
  -9   5  -4   51.41    6.15
 -10  -5  -4    9.44    5.70
 -10  -5  -4    5.16    5.10
 -10  -5  -4    6.04    4.50
 -10   5  -4    2.76    5.05
 -10   5  -4    6.04    4.75
 -10   5  -4   -8.97    6.40
 -11  -5  -4    6.86    5.82
 -11  -5  -4    0.93    6.18
 -11   5  -4   12.30    8.92
 -11   5  -4   -1.23    5.06
 -11   5  -4    4.17    5.89
 -11  -6   4   66.87    7.40
 -11   6   4   53.09   11.51
 -10  -6   4  119.00    9.50
 -10   6   4  127.08    8.39
 -10   6   4  110.43   13.64
 -10   6   4  113.84    8.56
  -9  -6   4    8.92    3.60
  -9  -6   4   12.07    4.59
  -9   6   4    7.29    4.01
  -9   6   4    9.56    4.16
  -9   6   4    6.55    7.09
  -8  -6   4  108.61    7.40
  -8  -6   4  109.97    8.08
  -8   6   4  100.42    7.51
  -8   6   4  101.87    7.03
  -8   6   4  105.62   11.53
  -8   6   4  105.56    7.66
  -7  -6   4  253.08   11.14
  -7  -6   4  230.86   11.11
  -7   6   4  248.67   10.95
  -7   6   4  259.18   11.11
  -7   6   4  236.89   14.65
  -7   6   4  254.49   10.90
  -6  -6   4   84.60    6.76
  -6  -6   4   79.77    6.50
  -6   6   4   86.74    6.41
  -6   6   4   75.99    6.39
  -6   6   4   96.71    6.56
  -6   6   4   66.16    8.39
  -5  -6   4   22.69    3.98
  -5  -6   4   24.63    4.11
  -5   6   4   17.03    3.80
  -5   6   4   18.30    5.52
  -5   6   4   23.98    4.03
  -5   6   4   15.03    3.68
  -4  -6   4    1.45    2.81
   4  -6  -4    4.62    2.17
  -4  -6   4    1.82    2.82
  -4   6   4   -1.05    4.05
  -4   6   4    1.09    2.74
  -4   6   4   -1.66    2.85
  -4   6   4    4.69    2.95
   4   6  -4   -0.79    1.96
  -3  -6   4  180.92    8.89
   3  -6  -4  172.02    7.88
  -3  -6   4  180.48    8.71
   3   6  -4  172.02    8.07
  -3   6   4  185.74    8.94
  -3   6   4  182.68   10.05
  -3   6   4  171.42    8.70
  -3   6   4  178.96    8.66
  -2  -6   4 1401.67   43.13
   2  -6  -4 1405.59   42.56
  -2  -6   4 1384.81   44.20
  -2   6   4 1389.02   44.61
  -2   6   4 1447.85   44.30
   2   6  -4 1406.22   42.69
  -2   6   4 1378.34   42.87
  -2   6   4 1397.20   44.07
  -1  -6   4  427.87   16.21
  -1  -6   4  392.28   14.99
  -1   6   4  389.83   16.01
   1   6  -4  398.63   14.79
  -1   6   4  411.30   15.06
  -1   6   4  376.48   15.01
   0  -6   4  531.17   18.51
   0  -6  -4  514.31   18.31
   0   6  -4  527.07   18.38
   0   6   4  521.22   18.43
   1  -6   4  993.84   32.30
  -1  -6  -4 1005.26   32.46
   1   6   4 1047.94   32.42
  -1   6  -4 1035.70   32.51
  -2  -6  -4   65.24    5.90
  -2  -6  -4   65.23    5.86
   2  -6   4   46.45    4.87
  -2   6  -4   52.68    5.32
  -2   6  -4   51.07    5.25
   2   6   4   53.19    5.23
  -3  -6  -4  399.15   15.28
  -3  -6  -4  374.06   14.97
   3  -6   4  384.93   14.37
  -3  -6  -4  379.19   14.97
  -3   6  -4  392.86   14.99
   3   6   4  389.08   14.53
  -3   6  -4  405.19   15.24
  -4  -6  -4  610.89   21.34
  -4  -6  -4  594.42   21.31
  -4  -6  -4  583.79   20.93
   4  -6   4  584.00   19.82
  -4   6  -4  576.08   20.78
  -4   6  -4  601.52   21.21
   4   6   4  606.77   20.11
  -5  -6  -4  243.78   11.33
  -5  -6  -4  255.03   11.62
  -5  -6  -4  248.73   11.51
  -5   6  -4  256.51   11.50
  -5   6  -4  248.09   11.50
  -6  -6  -4    5.42    3.12
  -6  -6  -4   11.48    3.79
  -6  -6  -4   15.64    4.17
  -6   6  -4   19.46    4.24
  -6   6  -4   16.31    4.21
  -7  -6  -4  123.30    8.79
  -7  -6  -4  118.98    8.47
  -7  -6  -4  106.46    8.06
  -7   6  -4  105.99    8.37
  -7   6  -4  127.76    8.67
  -8  -6  -4   78.93    7.88
  -8  -6  -4   72.17    7.38
  -8   6  -4   86.33    7.65
  -8   6  -4   93.68    8.34
  -9  -6  -4   44.71    6.68
  -9  -6  -4   50.45    7.00
  -9  -6  -4   40.78    6.42
  -9   6  -4   42.31    9.42
  -9   6  -4   50.77    6.45
  -9   6  -4   48.96    6.69
 -10  -6  -4    5.53    4.67
 -10  -6  -4   -7.79    5.23
 -10  -6  -4   -2.48    4.85
 -10   6  -4    0.63    5.14
 -10   6  -4    2.70    4.78
 -10   6  -4    3.58    4.22
 -10   6  -4   -0.53    7.50
 -11  -6  -4   -3.48    5.49
 -11  -6  -4    4.14    6.60
 -11   6  -4    9.24    5.88
 -11   6  -4   -0.73    5.70
 -11   6  -4    3.80    8.37
 -11  -7   4    8.33    5.89
 -11   7   4    4.45    8.72
 -11   7   4    9.16    5.05
 -10  -7   4    8.64    5.35
 -10   7   4    5.31    5.00
 -10   7   4    2.03    4.64
 -10   7   4    9.02    8.12
  -9  -7   4  107.00    8.18
  -9  -7   4  121.31    9.54
  -9   7   4  121.32    9.22
  -9   7   4  104.25   12.98
  -9   7   4  128.47    9.08
  -8  -7   4   29.23    4.86
  -8  -7   4   21.60    5.04
  -8   7   4   29.41    5.10
  -8   7   4   32.42    4.86
  -8   7   4   36.15    8.37
  -8   7   4   30.46    5.16
  -7  -7   4   -6.09    3.27
  -7  -7   4    1.05    3.23
  -7   7   4    2.02    3.56
  -7   7   4    8.88    5.94
  -7   7   4    3.60    3.33
  -7   7   4    1.60    3.72
  -6  -7   4    0.58    3.21
  -6  -7   4   -0.29    3.16
  -6   7   4    0.20    5.12
  -6   7   4   -0.19    3.25
  -6   7   4   -0.07    3.16
  -6   7   4    2.65    3.38
  -5  -7   4   54.13    5.76
  -5  -7   4   57.02    5.51
  -5   7   4   70.00    6.10
  -5   7   4   58.08    7.70
  -5   7   4   60.51    5.74
  -5   7   4   54.87    5.34
  -4  -7   4  185.69    9.24
   4  -7  -4  177.51    7.82
  -4  -7   4  172.55    9.27
   4   7  -4  173.54    7.92
  -4   7   4  186.75    9.18
  -4   7   4  197.64    9.39
  -4   7   4  166.31    9.22
  -4   7   4  183.03   11.00
   3  -7  -4   -0.01    2.45
  -3  -7   4    3.79    2.82
  -3  -7   4   -3.28    2.66
  -3   7   4   -4.26    3.30
  -3   7   4    1.51    2.89
  -3   7   4    0.92    3.23
  -3   7   4   -0.08    2.59
   3   7  -4   -1.13    2.56
   2  -7  -4   96.22    6.78
  -2  -7   4  115.35    6.93
  -2  -7   4  119.95    7.41
   2   7  -4  119.13    7.11
  -2   7   4   87.52    7.49
  -2   7   4  107.27    7.02
  -2   7   4   90.29    7.06
  -2   7   4  108.51    7.25
  -1  -7   4  852.91   29.14
  -1  -7   4  892.86   28.76
   1  -7  -4  854.38   28.17
  -1   7   4  909.91   28.73
   1   7  -4  858.27   28.25
  -1   7   4  869.49   29.19
   0  -7   4   48.42    5.13
   0  -7  -4   38.43    4.74
   0   7   4   51.85    5.45
   0   7  -4   55.86    5.39
  -1  -7  -4  109.41    7.22
   1  -7   4   81.22    6.60
   1   7   4   90.56    7.01
  -1   7  -4   92.46    7.08
   2  -7   4    2.59    2.88
  -2  -7  -4    3.34    3.02
  -2  -7  -4    7.07    2.90
  -2  -7  -4    2.93    2.33
  -2   7  -4   -2.09    2.88
   2   7   4   -1.75    2.83
  -2   7  -4    4.68    2.94
  -3  -7  -4    9.41    2.66
   3  -7   4   17.12    3.59
  -3  -7  -4   11.17    3.09
  -3  -7  -4   16.15    3.99
  -3   7  -4    9.53    3.28
   3   7   4   21.73    4.10
  -3   7  -4    7.64    3.34
  -4  -7  -4   33.61    4.60
   4  -7   4   40.97    4.70
  -4  -7  -4   46.56    5.73
  -4  -7  -4   51.35    5.75
  -4   7  -4   54.78    5.64
   4   7   4   50.58    5.03
  -4   7  -4   52.42    5.51
  -5  -7  -4    1.89    3.26
  -5  -7  -4   12.15    3.73
  -5  -7  -4    5.74    3.09
  -5   7  -4    0.90    3.27
  -5   7  -4    5.15    3.47
  -6  -7  -4  113.08    8.47
  -6  -7  -4  123.58    8.57
  -6  -7  -4  102.68    7.83
  -6   7  -4  118.21    8.50
  -6   7  -4  104.80    8.15
  -7  -7  -4   38.97    5.43
  -7  -7  -4   36.47    5.83
  -7  -7  -4   41.13    6.09
  -7   7  -4   32.08    5.53
  -7   7  -4   37.77    5.65
  -8  -7  -4   69.46    7.91
  -8  -7  -4   69.57    7.87
  -8  -7  -4   71.85    7.53
  -8   7  -4   73.62   10.22
  -8   7  -4   77.52    7.65
  -8   7  -4   80.57    7.98
  -9  -7  -4   16.43    5.32
  -9  -7  -4   10.49    5.62
  -9   7  -4   20.46    7.86
  -9   7  -4   16.95    5.47
  -9   7  -4   12.83    5.07
 -10  -7  -4   27.71    6.84
 -10  -7  -4   37.43    6.61
 -10  -7  -4   29.91    6.78
 -10   7  -4   38.67    9.95
 -10   7  -4   40.07    7.20
 -10   7  -4   42.10    6.62
 -11  -7  -4   31.57    7.81
 -11  -7  -4   24.71    6.81
 -11   7  -4   24.47    6.70
 -11   7  -4   20.11    9.62
 -11   7  -4   19.33    6.65
 -11  -8   4   22.09    6.85
 -11   8   4   22.24    5.87
 -11   8   4   25.19    9.92
 -10  -8   4    3.50    5.69
 -10   8   4    3.14    5.50
 -10   8   4   11.84    8.46
 -10   8   4    0.39    5.20
  -9  -8   4   -2.41    4.77
  -9  -8   4    4.19    4.15
  -9   8   4    8.56    4.91
  -9   8   4    1.36    6.79
  -9   8   4   -0.42    3.77
  -9   8   4    0.46    4.65
  -8  -8   4   65.82    7.24
  -8  -8   4   64.58    6.77
  -8   8   4   65.98    6.95
  -8   8   4   68.35   10.05
  -8   8   4   70.46    6.71
  -8   8   4   58.71    6.73
  -7  -8   4    5.59    4.05
  -7  -8   4   -0.43    3.82
  -7   8   4   10.78    4.34
  -7   8   4   10.77    4.23
  -7   8   4    8.44    4.38
  -7   8   4    7.55    5.79
  -6  -8   4   45.36    5.71
  -6  -8   4   44.02    5.85
  -6   8   4   45.82    5.57
  -6   8   4   34.13    7.19
  -6   8   4   56.17    6.07
  -6   8   4   46.80    5.60
  -5  -8   4   -0.04    2.82
  -5  -8   4    1.19    3.40
  -5   8   4    3.38    3.05
  -5   8   4   -1.82    3.41
  -5   8   4   -0.69    3.22
  -5   8   4    4.18    4.97
  -4  -8   4    7.16    3.35
   4  -8  -4    3.33    2.58
  -4  -8   4    2.26    2.97
  -4   8   4    2.35    3.55
  -4   8   4    4.73    3.39
  -4   8   4    9.92    4.61
  -4   8   4    6.47    3.49
   4   8  -4    6.71    2.73
   3  -8  -4    8.07    3.22
  -3  -8   4    9.67    3.46
  -3  -8   4    4.21    3.02
   3   8  -4    8.66    3.32
  -3   8   4    2.61    3.88
  -3   8   4    3.40    3.34
  -3   8   4    7.88    3.65
  -3   8   4    6.58    3.22
   2  -8  -4   50.42    5.05
  -2  -8   4   50.54    5.73
  -2   8   4   50.92    5.58
  -2   8   4   51.90    5.55
   2   8  -4   53.65    5.45
  -2   8   4   54.16    6.29
   1  -8  -4  253.49   11.47
  -1  -8   4  259.72   11.86
   1   8  -4  252.60   11.64
  -1   8   4  299.17   13.14
  -1   8   4  258.34   12.04
   0  -8  -4   15.12    3.81
   0  -8   4   17.27    3.85
   0   8  -4   21.01    4.02
   0   8   4   10.67    3.80
   1  -8   4   15.29    3.94
  -1  -8  -4    6.56    3.32
   1   8   4    5.34    3.44
  -1   8  -4   17.29    3.94
   2  -8   4   60.19    5.97
  -2  -8  -4   53.33    5.09
  -2  -8  -4   47.95    5.66
  -2  -8  -4   34.69    4.35
  -2   8  -4   52.00    5.73
  -2   8  -4   63.32    6.12
   2   8   4   48.87    5.52
  -3  -8  -4    1.96    3.38
  -3  -8  -4    3.74    3.38
  -3  -8  -4    2.74    2.54
   3  -8   4    7.64    3.28
  -3   8  -4    2.77    3.37
  -3   8  -4    5.26    3.50
   3   8   4    0.87    2.89
   4  -8   4    3.67    2.96
  -4  -8  -4    0.83    3.00
  -4  -8  -4    6.00    3.13
  -4  -8  -4    1.97    3.35
  -4   8  -4   -2.01    3.02
   4   8   4   -2.32    2.64
  -4   8  -4    0.63    3.26
  -5  -8  -4   71.59    6.35
  -5  -8  -4   59.48    6.63
  -5  -8  -4   70.59    7.07
  -5   8  -4   61.02    6.67
  -5   8  -4   69.81    7.03
  -6  -8  -4   -2.09    3.27
  -6  -8  -4   -1.72    2.84
  -6  -8  -4   -2.81    3.42
  -6   8  -4   -5.91    3.27
  -6   8  -4   -3.74    3.60
  -7  -8  -4   10.07    4.55
  -7  -8  -4   10.46    5.12
  -7  -8  -4   14.37    4.65
  -7   8  -4   12.15    4.60
  -7   8  -4   10.30    4.97
  -8  -8  -4   33.66    6.17
  -8  -8  -4   41.78    7.22
  -8  -8  -4   30.37    5.72
  -8   8  -4   29.91    5.95
  -8   8  -4   41.35    6.48
  -8   8  -4   31.05    7.96
  -9  -8  -4   11.50    5.58
  -9  -8  -4    4.16    4.74
  -9   8  -4    7.10    5.11
  -9   8  -4    5.85    7.44
  -9   8  -4    3.57    4.99
 -10  -8  -4   -5.18    5.09
 -10  -8  -4    2.94    5.06
 -10  -8  -4   -2.43    5.87
 -10   8  -4   -3.99    5.65
 -10   8  -4   -0.84    7.64
 -10   8  -4   12.54    5.16
 -11  -8  -4    7.36    6.89
 -11  -8  -4   -1.20    5.98
 -11   8  -4   -2.95    7.73
 -11   8  -4    1.63    6.20
 -11  -9   4    4.93    6.14
 -11  -9   4    5.75    6.55
 -11   9   4   -2.08    8.02
 -11   9   4    6.07    6.03
 -10  -9   4   17.70    6.80
 -10   9   4    1.32    5.80
 -10   9   4   -1.63    7.01
  -9  -9   4   16.95    5.16
  -9  -9   4   27.65    6.54
  -9   9   4   25.91    6.27
  -9   9   4   30.60    6.42
  -9   9   4   31.91    8.66
  -9   9   4   26.08    5.45
  -8  -9   4   46.01    6.50
  -8  -9   4   43.19    6.78
  -8   9   4   42.61    9.40
  -8   9   4   33.20    6.21
  -8   9   4   40.58    6.30
  -8   9   4   44.82    6.75
  -7  -9   4    4.10    4.06
  -7  -9   4   10.06    4.59
  -7   9   4    5.57    5.82
  -7   9   4    5.12    4.44
  -7   9   4    4.36    4.36
  -7   9   4   -4.01    4.05
  -6  -9   4    4.06    3.65
  -6  -9   4   -5.10    3.58
  -6   9   4    5.41    5.90
  -6   9   4    1.88    4.01
  -6   9   4    4.86    3.96
  -6   9   4   -1.68    3.93
  -5  -9   4  319.86   14.39
  -5  -9   4  321.18   14.19
  -5   9   4  318.99   14.11
  -5   9   4  315.88   13.96
  -5   9   4  312.66   15.95
  -5   9   4  325.27   14.18
  -4  -9   4  398.68   16.29
  -4  -9   4  395.27   16.19
  -4   9   4  399.06   16.13
  -4   9   4  397.96   16.06
   4   9  -4  396.67   14.92
  -4   9   4  383.70   16.07
  -4   9   4  378.70   17.45
  -3  -9   4   17.97    4.04
  -3  -9   4   12.19    3.94
   3  -9  -4   18.47    4.12
  -3   9   4   21.04    4.17
   3   9  -4   17.77    3.97
  -3   9   4   18.11    4.81
  -3   9   4   21.22    4.65
  -3   9   4   12.86    4.32
  -2  -9   4  198.09   10.17
   2  -9  -4  217.93   10.20
  -2  -9   4  192.62   10.55
  -2   9   4  213.31   10.76
  -2   9   4  198.68   10.51
  -2   9   4  216.99   10.42
   2   9  -4  179.21   10.08
  -2   9   4  214.04   10.84
  -1  -9   4  198.33   10.64
   1  -9  -4  213.47   10.45
  -1   9   4  194.23   10.31
  -1   9   4  199.93   10.72
   1   9  -4  215.77   10.64
  -1   9   4  214.65   10.20
   0  -9  -4   97.53    7.67
   0  -9   4  105.93    7.86
   0   9  -4   93.65    7.40
   0   9   4   95.66    7.65
  -1  -9  -4   54.57    6.34
   1  -9   4   44.30    5.37
  -1   9  -4   47.25    5.60
   1   9   4   48.88    5.69
   2  -9   4  282.21   12.74
  -2  -9  -4  287.27   13.39
  -2  -9  -4  353.08   14.76
   2   9   4  288.61   12.93
  -2   9  -4  281.26   13.15
  -2   9  -4  274.88   13.08
  -3  -9  -4  471.80   18.11
   3  -9   4  389.12   15.23
  -3  -9  -4  358.24   15.84
   3   9   4  367.20   15.26
  -3   9  -4  363.75   15.83
  -3   9  -4  352.26   15.58
  -4  -9  -4   12.07    4.58
  -4  -9  -4   15.23    4.19
   4  -9   4   15.86    3.77
  -4  -9  -4    6.21    3.79
  -4   9  -4   16.65    4.46
  -4   9  -4   13.45    4.05
   4   9   4   11.56    3.83
  -5  -9  -4   33.36    5.41
  -5  -9  -4   26.47    5.18
  -5  -9  -4   25.78    5.39
  -5   9  -4   15.12    4.66
  -5   9  -4   24.02    5.18
  -6  -9  -4  106.74    9.36
  -6  -9  -4  122.22    8.70
  -6  -9  -4  116.82    9.28
  -6   9  -4  125.77    9.76
  -6   9  -4  124.72    9.99
  -7  -9  -4  163.73   10.58
  -7  -9  -4  189.04   11.61
  -7  -9  -4  174.43   11.55
  -7   9  -4  164.63   11.29
  -7   9  -4  182.00   11.56
  -8  -9  -4    4.55    5.21
  -8  -9  -4   -3.77    3.50
  -8  -9  -4   -2.22    4.52
  -8   9  -4    7.28    6.59
  -8   9  -4   -3.51    4.41
  -8   9  -4    0.97    4.81
  -9  -9  -4   18.47    6.01
  -9  -9  -4   17.40    6.47
  -9  -9  -4   11.82    5.91
  -9   9  -4   19.84    5.98
  -9   9  -4   21.29    8.47
  -9   9  -4   14.14    6.09
 -10  -9  -4   52.47    8.76
 -10   9  -4   49.71   10.77
 -10   9  -4   50.62    8.03
 -10   9  -4   52.15    7.79
 -10 -10   4   13.60    5.66
 -10 -10   4   13.33    6.91
 -10  10   4   -1.72    8.02
 -10  10   4    9.61    6.19
  -9 -10   4    2.08    4.90
  -9 -10   4    7.32    5.90
  -9  10   4   -5.18    4.60
  -9  10   4   -7.10    5.12
  -9  10   4   -3.88    5.06
  -9  10   4    0.88    6.62
  -8 -10   4    8.64    5.03
  -8 -10   4    5.92    5.02
  -8  10   4    7.89    5.11
  -8  10   4    3.27    7.08
  -8  10   4    4.69    5.22
  -8  10   4    8.63    5.08
  -7 -10   4   92.97    8.42
  -7 -10   4   70.57    8.02
  -7  10   4   79.46   10.63
  -7  10   4   89.56    8.41
  -7  10   4   75.16    8.22
  -7  10   4   86.48    8.72
  -6 -10   4   57.70    6.71
  -6 -10   4   54.04    6.88
  -6  10   4   34.19    7.34
  -6  10   4   41.05    6.19
  -6  10   4   42.21    6.43
  -6  10   4   44.41    6.52
  -5 -10   4   32.86    5.96
  -5 -10   4   28.04    5.27
  -5  10   4   41.46    7.46
  -5  10   4   36.62    5.98
  -5  10   4   27.39    5.49
  -5  10   4   37.52    5.73
  -4 -10   4   79.54    7.41
  -4 -10   4   57.80    6.71
   4  10  -4   71.84    6.42
  -4  10   4   63.15    6.79
  -4  10   4   66.49    7.45
  -4  10   4   64.06    6.92
  -4  10   4   42.28    7.00
  -3 -10   4  773.57   27.26
  -3 -10   4  783.68   27.64
  -3  10   4  768.71   27.58
  -3  10   4  737.48   27.79
   3  10  -4  771.84   26.24
  -3  10   4  774.92   27.48
  -3  10   4  771.54   26.98
  -2 -10   4   44.22    5.03
  -2 -10   4   45.61    5.85
   2 -10  -4   57.02    6.04
   2  10  -4   53.95    6.01
  -2  10   4   61.16    6.88
  -2  10   4   55.60    6.24
  -2  10   4   73.11    7.49
  -2  10   4   90.08    9.72
  -1 -10   4    5.30    3.44
   1 -10  -4   -3.67    3.06
   1  10  -4    4.12    3.51
  -1  10   4    0.64    2.94
  -1  10   4    2.45    3.86
  -1  10   4    1.82    3.33
   0 -10   4   65.58    6.86
   0 -10  -4   50.20    6.17
   0  10   4   72.73    7.34
   0  10  -4   44.52    5.92
  -1 -10  -4  676.24   24.32
   1 -10   4  674.48   23.89
  -1  10  -4  645.15   23.88
   1  10   4  668.88   23.96
   2 -10   4  229.91   11.40
  -2 -10  -4  226.82   11.92
  -2 -10  -4  204.46   10.67
  -2  10  -4  227.55   12.34
   2  10   4  232.53   11.56
  -2  10  -4  204.32   11.49
  -3 -10  -4   65.40    6.53
  -3 -10  -4   63.31    6.89
   3 -10   4   74.04    6.92
  -3  10  -4   81.13    7.99
   3  10   4   55.81    6.45
  -3  10  -4   66.19    7.24
  -4 -10  -4  295.26   14.04
   4 -10   4  265.26   12.39
  -4 -10  -4  275.88   13.28
  -4  10  -4  288.11   13.70
   4  10   4  267.71   12.69
  -4  10  -4  282.88   13.68
  -5 -10  -4    5.41    3.57
  -5 -10  -4    5.37    4.09
  -5  10  -4    6.77    4.38
  -5  10  -4   -1.77    3.68
  -6 -10  -4    6.71    4.43
  -6 -10  -4    4.22    3.44
  -6  10  -4  -10.10    3.85
  -6  10  -4   11.55    4.73
  -7 -10  -4    0.14    3.56
  -7 -10  -4   -3.07    4.30
  -7  10  -4    3.80    5.16
  -7  10  -4    1.30    5.13
  -8 -10  -4   94.41    9.50
  -8 -10  -4   92.04    9.17
  -8  10  -4   72.91   11.15
  -8  10  -4   80.61    9.07
  -8  10  -4  106.26   10.03
  -9 -10  -4   -2.64    4.88
  -9 -10  -4   -1.20    4.66
  -9  10  -4   -0.96    5.21
  -9  10  -4    2.82    6.90
  -9  10  -4   -2.41    5.20
 -10 -10  -4   14.25    6.43
 -10  10  -4   14.43    6.17
 -10  10  -4    0.47    6.51
 -10  10  -4    2.51    7.32
 -10 -11   4   -7.99    5.71
 -10 -11   4   -3.99    4.90
 -10 -11   4    1.98    6.50
 -10  11   4    2.07    6.60
 -10  11   4   -2.41    7.72
  -9 -11   4    4.74    5.29
  -9 -11   4    7.97    5.88
  -9  11   4    6.17    7.77
  -9  11   4   11.25    6.65
  -9  11   4   21.44    6.74
  -9  11   4    8.31    5.71
  -8 -11   4   80.58    8.95
  -8 -11   4   71.52    8.65
  -8  11   4   90.70    9.04
  -8  11   4   79.18   11.37
  -8  11   4   86.48    9.05
  -8  11   4   72.27    8.64
  -7 -11   4    6.95    4.81
  -7 -11   4   -1.39    4.75
  -7  11   4    4.61    4.46
  -7  11   4    4.67    5.23
  -7  11   4    7.04    5.19
  -7  11   4    7.32    6.53
  -6 -11   4    4.89    4.77
  -6 -11   4   -3.60    3.76
  -6  11   4    1.08    4.77
  -6  11   4   -3.08    5.53
  -6  11   4   -0.54    3.63
  -6  11   4    1.28    4.51
  -5 -11   4   37.53    5.75
  -5 -11   4   32.75    5.94
  -5  11   4   34.44    6.23
  -5  11   4   41.26    6.28
  -5  11   4   40.13    7.47
  -5  11   4   40.43    6.31
  -4 -11   4   55.89    6.86
  -4 -11   4   76.93    7.67
  -4  11   4   65.52    7.46
  -4  11   4   53.21    7.87
  -4  11   4   56.28    6.56
  -4  11   4   58.24    7.18
   3 -11  -4   -3.77    2.85
  -3 -11   4    3.16    3.08
  -3 -11   4   -0.18    3.75
   3  11  -4   -1.85    3.34
  -3  11   4    2.60    4.11
  -3  11   4    7.09    4.56
  -3  11   4    6.53    4.39
  -3  11   4    0.87    3.45
  -2 -11   4    5.08    3.13
  -2 -11   4   -2.29    3.29
   2 -11  -4    4.98    3.69
  -2  11   4    1.14    2.98
   2  11  -4    0.67    3.66
  -2  11   4   -5.01    3.76
  -2  11   4   -7.22    3.48
   1 -11  -4    6.43    4.00
  -1 -11   4   10.24    4.19
  -1  11   4    9.69    4.68
   1  11  -4   16.29    4.57
  -1  11   4    6.03    3.84
   0 -11  -4    7.77    3.94
   0 -11   4    4.03    3.63
   0  11  -4    4.07    3.88
   0  11   4    4.93    4.00
  -1 -11  -4    0.44    3.62
   1 -11   4    1.63    3.45
  -1  11  -4    1.04    3.81
   1  11   4   -0.70    3.64
   2 -11   4    7.21    3.86
  -2 -11  -4   10.61    4.42
   2  11   4    5.49    4.05
  -2  11  -4    3.63    4.06
   3 -11   4    6.32    3.81
  -3 -11  -4    5.83    4.09
  -3  11  -4   -2.90    3.47
   3  11   4    2.41    3.71
  -4 -11  -4   68.83    7.63
   4 -11   4   64.65    6.83
  -4 -11  -4   64.63    7.57
  -4  11  -4   76.61    8.23
   4  11   4   76.81    7.36
  -5 -11  -4   25.70    5.27
  -5 -11  -4   22.09    5.68
  -5  11  -4   14.48    5.06
  -6 -11  -4    5.57    4.00
  -6 -11  -4    0.63    4.21
  -6  11  -4   -0.28    4.51
  -7 -11  -4   -8.73    4.19
  -7 -11  -4    2.55    3.94
  -7  11  -4   -1.15    4.91
  -7  11  -4    2.22    6.04
  -8 -11  -4   -1.24    4.96
  -8 -11  -4   -0.16    4.40
  -8  11  -4    3.85    5.66
  -8  11  -4   -9.93    6.29
  -9 -11  -4    5.50    5.67
  -9 -11  -4    5.75    5.67
  -9  11  -4   -6.11    6.92
  -9  11  -4   -0.41    5.29
 -10 -11  -4    6.99    5.85
 -10 -11  -4   13.55    6.46
 -10  11  -4    0.45    7.12
 -10  11  -4    7.36    6.11
 -10 -12   4    5.63    6.67
 -10 -12   4    6.99    6.14
 -10  12   4    7.55    7.68
 -10  12   4   21.98    9.63
  -9 -12   4   10.14    6.16
  -9 -12   4    8.89    6.22
  -9  12   4   12.05    6.53
  -9  12   4   11.06    6.63
  -9  12   4   10.34    7.97
  -8 -12   4   -0.92    4.73
  -8 -12   4    9.69    5.74
  -8  12   4    0.32    5.75
  -8  12   4    3.21    5.55
  -8  12   4   -5.16    5.56
  -8  12   4    1.27    7.08
  -7 -12   4   77.22    8.59
  -7 -12   4   80.58    9.32
  -7  12   4   79.31    8.93
  -7  12   4   73.18    8.96
  -7  12   4   92.82    9.56
  -7  12   4   84.85   11.33
  -6 -12   4  104.72    9.85
  -6 -12   4  102.97    9.97
  -6  12   4  121.45   10.63
  -6  12   4  104.33   11.57
  -6  12   4  101.97    9.68
  -6  12   4  111.34    9.86
  -5 -12   4   -1.39    4.26
  -5 -12   4    4.67    4.17
  -5  12   4    8.40    4.40
  -5  12   4    1.47    5.33
  -5  12   4    1.83    4.62
  -4 -12   4   94.05    9.43
  -4 -12   4   96.57    9.06
  -4  12   4  107.10    8.73
  -4  12   4   89.69    8.90
  -4  12   4  109.71   10.47
   3 -12  -4   27.80    5.12
  -3 -12   4   34.77    6.07
  -3  12   4   32.05    5.92
  -3  12   4   35.83    6.33
  -3  12   4   28.17    6.18
   3  12  -4   36.45    5.91
   2 -12  -4   72.57    7.23
  -2 -12   4   65.49    7.68
  -2  12   4   74.44    7.85
  -2  12   4   70.54    8.10
   2  12  -4   70.53    7.55
   1 -12  -4   12.75    4.81
  -1 -12   4    1.96    3.99
  -1  12   4    5.92    4.51
   1  12  -4    6.58    4.19
  -1  12   4    2.32    3.83
   0 -12   4  156.32   10.44
   0 -12  -4  159.83   10.66
   0  12  -4  143.32   10.03
   0  12   4  143.47   10.46
   1 -12   4  201.28   11.46
  -1 -12  -4  195.34   11.90
  -1  12  -4  181.10   11.46
   1  12   4  186.67   11.56
   2 -12   4   65.68    7.07
  -2 -12  -4   74.96    8.22
  -2  12  -4   76.04    8.25
   2  12   4   65.20    7.36
  -3 -12  -4   16.36    5.01
   3 -12   4    5.33    4.03
  -3  12  -4    7.11    4.62
   3  12   4   10.89    4.59
  -4 -12  -4  139.96   10.73
   4  12   4  147.77   10.00
  -4  12  -4  146.75   10.62
  -5 -12  -4  119.26   10.62
  -5  12  -4  116.53   10.34
  -6 -12  -4    3.92    5.02
  -6  12  -4    3.78    5.14
  -7 -12  -4    8.55    5.50
  -7  12  -4    2.12    5.34
  -7  12  -4    4.36    6.18
  -8 -12  -4   19.34    6.37
  -8  12  -4   17.98    6.77
  -8  12  -4   18.31    7.98
  -9 -12  -4   47.35    7.95
  -9  12  -4   41.10    9.96
  -9  12  -4   50.64    8.40
 -10 -12  -4   -3.52    5.36
 -10  12  -4    5.77    6.17
 -10  12  -4    9.23    8.15
 -10 -13   4   34.96    8.03
 -10 -13   4   27.23    8.11
 -10  13   4   26.81    7.78
 -10  13   4   22.80    9.08
  -9 -13   4    9.74    7.03
  -9 -13   4   19.24    7.09
  -9  13   4    9.52    8.68
  -9  13   4   15.90    6.91
  -8 -13   4   23.41    7.60
  -8 -13   4   22.58    6.40
  -8  13   4    8.91    6.88
  -8  13   4   43.56   10.10
  -7 -13   4   18.03    6.37
  -7  13   4   15.40    6.09
  -7  13   4   18.81    6.63
  -7  13   4   31.86    8.54
  -6 -13   4   49.11    8.14
  -6  13   4   39.31    6.68
  -6  13   4   50.72    7.68
  -6  13   4   36.92    8.35
  -5 -13   4  133.04   11.31
  -5  13   4  110.25   11.45
  -5  13   4  145.51   10.76
  -5  13   4  143.74   11.41
  -4 -13   4   11.28    4.98
  -4  13   4   22.65    6.86
  -4  13   4   26.48    6.28
   3 -13  -4    6.84    4.38
  -3 -13   4    6.67    4.61
   3  13  -4    8.73    4.59
  -3  13   4   15.35    5.55
  -3  13   4   16.81    5.83
   2 -13  -4    5.45    4.17
  -2 -13   4    2.28    4.35
   2  13  -4   -3.38    4.04
  -2  13   4   -9.96    3.72
  -2  13   4    5.75    4.88
  -1 -13   4  221.93   12.95
   1 -13  -4  210.61   12.62
  -1  13   4  220.89   11.53
   1  13  -4  232.23   12.74
  -1  13   4  185.61   12.35
   0 -13  -4   50.81    7.25
   0 -13   4   53.59    7.31
   0  13   4   41.46    6.68
   0  13  -4   50.07    7.02
  -1 -13  -4   28.80    5.81
   1 -13   4   28.15    5.88
  -1  13  -4   34.68    6.30
   1  13   4   28.87    6.13
  -2 -13  -4  360.53   16.85
   2 -13   4  359.35   16.12
   2  13   4  334.04   16.19
  -2  13  -4  330.16   16.48
  -3 -13  -4  158.77   11.23
   3 -13   4  147.13   10.22
  -3  13  -4  109.06    9.92
   3  13   4  153.34   10.76
  -4 -13  -4   20.51    5.37
  -4  13  -4   15.84    5.59
  -5 -13  -4    2.04    4.59
  -5  13  -4    6.88    5.38
  -6 -13  -4   79.95    9.36
  -6  13  -4  113.86   11.68
  -6  13  -4  103.55   10.36
  -7 -13  -4    9.44    5.64
  -7  13  -4    5.92    6.95
  -7  13  -4   -8.54    5.08
  -8 -13  -4    7.08    5.59
  -8  13  -4    9.91    7.35
  -8  13  -4   18.80    7.14
  -9 -13  -4    5.51    6.03
  -9  13  -4    5.69    6.71
  -9  13  -4   10.74    8.10
  -9 -14   4   24.48    7.74
  -9  14   4   15.53    9.12
  -9  14   4   34.11    8.21
  -8 -14   4    0.94    6.35
  -8  14   4   15.11    7.17
  -8  14   4   16.59    8.30
  -7 -14   4    3.42    6.03
  -7  14   4    0.74    6.08
  -7  14   4   -6.49    6.12
  -6 -14   4   39.42    7.73
  -6  14   4   13.18    6.55
  -6  14   4   27.53    8.02
  -5 -14   4    2.68    5.28
  -5  14   4    6.08    6.27
  -5  14   4    1.64    5.52
  -4 -14   4   15.77    6.07
  -4  14   4   20.49    6.65
  -4  14   4   14.62    5.85
  -3 -14   4   -2.63    4.37
   3 -14  -4    3.12    4.32
  -3  14   4    2.71    5.18
  -3  14   4    5.64    5.14
   3  14  -4   -6.50    4.06
  -2 -14   4    2.78    4.41
   2 -14  -4   -0.24    4.22
   2  14  -4    0.80    4.38
  -2  14   4    0.33    4.66
  -2  14   4    1.76    4.75
   1 -14  -4    3.95    4.59
  -1 -14   4   -1.10    4.58
   1  14  -4    2.49    4.69
  -1  14   4    2.63    5.04
   0 -14  -4    6.90    4.62
   0 -14   4    1.38    4.34
   0  14  -4    4.83    4.62
   0  14   4    9.24    5.30
   1 -14   4    4.45    4.64
  -1 -14  -4    5.80    4.99
   1  14   4    2.42    4.89
  -1  14  -4    1.55    4.60
  -2 -14  -4   13.44    5.15
   2 -14   4   22.93    5.83
  -2  14  -4   13.61    5.43
   2  14   4   10.11    5.28
   3 -14   4   -0.88    3.98
  -3 -14  -4    4.80    4.92
  -3  14  -4    1.38    4.65
   3  14   4   -1.04    4.54
  -4 -14  -4    3.60    4.45
  -4  14  -4    1.04    4.85
  -5 -14  -4    3.10    4.95
  -5  14  -4    2.27    5.03
  -6 -14  -4    2.33    4.83
  -6  14  -4    0.66    5.75
  -6  14  -4    9.50    5.90
  -7 -14  -4    7.09    5.53
  -7  14  -4    7.18    6.89
  -7  14  -4   18.38    6.92
  -8 -14  -4    4.84    5.64
  -8  14  -4   -7.22    5.81
  -8  14  -4    8.39    7.47
  -9 -14  -4   -1.72    5.28
  -9  14  -4    0.57    7.66
  -9  14  -4   10.29    7.14
  -9 -15   4  122.29   12.92
  -9  15   4  124.12   15.33
  -9  15   4  140.68   13.57
  -8 -15   4   70.69   10.60
  -8  15   4   74.86   11.88
  -8  15   4   85.07   11.18
  -7 -15   4    6.58    6.66
  -7  15   4    7.93    6.73
  -7  15   4   -4.34    7.09
  -6 -15   4   30.15    7.45
  -6  15   4   38.16    8.21
  -6  15   4   10.98    7.21
  -5 -15   4   44.53    8.20
  -5  15   4   43.97    8.11
  -5  15   4   37.05    8.32
  -4 -15   4   32.69    7.29
  -4  15   4   29.98    7.35
  -4  15   4   40.45    7.85
  -3 -15   4   39.48    7.67
  -3  15   4   45.43    7.93
  -3  15   4   31.40    7.04
   3  15  -4   35.52    6.48
  -2 -15   4   63.05    8.87
   2 -15  -4   84.83    9.25
   2  15  -4   65.18    8.48
  -2  15   4   76.14    8.51
  -2  15   4   58.37    8.48
   1 -15  -4  251.51   14.48
  -1 -15   4  209.56   13.66
   1  15  -4  214.48   13.53
  -1  15   4  199.26   13.90
   0 -15  -4   62.71    8.16
   0 -15   4   80.27    9.23
   0  15   4   67.20    8.72
   0  15  -4   96.77    9.49
   1 -15   4   53.66    7.73
  -1 -15  -4   41.61    7.36
   1  15   4   50.33    7.90
  -1  15  -4   60.21    8.50
  -2 -15  -4  344.64   17.98
   2 -15   4  392.73   17.87
   2  15   4  366.76   17.90
  -2  15  -4  340.24   17.70
  -3 -15  -4   73.38    9.52
   3 -15   4   56.49    7.42
   3  15   4   75.82    8.69
  -3  15  -4   36.24    7.47
  -4 -15  -4   17.20    5.99
  -4  15  -4   28.41    6.87
  -5 -15  -4   49.97    8.24
  -5  15  -4   61.56    8.78
  -5  15  -4   43.24    8.21
  -6 -15  -4   72.87    9.76
  -6  15  -4   74.64    9.73
  -6  15  -4   78.07   10.71
  -7 -15  -4    1.54    5.77
  -7  15  -4    6.05    7.14
  -7  15  -4   -5.91    5.79
  -8 -15  -4   14.91    6.53
  -8  15  -4    8.09    7.60
  -8  15  -4   -1.70    6.78
  -9 -15  -4   19.02    7.14
  -9  15  -4   11.59    7.26
  -9  15  -4   13.61    8.56
  -8 -16   4   50.10    9.84
  -8  16   4   46.21   10.42
  -8  16   4   45.07    9.69
  -7 -16   4    3.96    6.47
  -7  16   4   -2.85    6.63
  -7  16   4   12.60    8.25
  -6 -16   4   11.99    6.90
  -6  16   4    8.24    7.35
  -6  16   4   12.52    7.28
  -5 -16   4    1.24    5.74
  -5  16   4    4.44    6.52
  -5  16   4    0.14    5.88
  -4 -16   4   72.56    9.29
  -4  16   4   79.61   10.33
  -4  16   4   77.67    9.96
  -3 -16   4   71.41    9.56
   3  16  -4   77.53    9.22
  -3  16   4   77.84    9.75
  -3  16   4   79.08   10.22
   2 -16  -4    6.56    5.50
  -2 -16   4    0.03    5.13
   2  16  -4    7.99    5.51
  -2  16   4   -0.40    5.05
  -2  16   4   10.30    6.28
  -1 -16   4    5.83    5.44
   1 -16  -4    8.13    5.69
  -1  16   4    3.48    6.00
   1  16  -4   11.48    5.92
   0 -16   4  108.83   11.31
   0 -16  -4  115.56   11.54
   0  16   4   96.31   10.54
   0  16  -4  123.98   11.70
   1 -16   4   81.29    9.42
  -1 -16  -4   83.23   10.22
   1  16   4   77.40    9.59
  -1  16  -4   84.24    9.68
   2 -16   4   40.97    7.59
  -2 -16  -4   58.96    9.00
   2  16   4   34.56    7.26
  -2  16  -4   36.53    7.70
  -3 -16  -4   54.34    8.22
   3 -16   4   56.42    7.84
   3  16   4   42.74    7.93
  -3  16  -4   65.46    8.96
  -4 -16  -4    1.34    5.48
  -4  16  -4    6.60    5.82
  -4  16  -4   -5.86    5.24
  -5 -16  -4  127.08   12.82
  -5  16  -4  149.24   13.18
  -5  16  -4  123.68   12.33
  -6 -16  -4   33.52    7.36
  -6  16  -4   22.34    7.69
  -6  16  -4   24.68    7.77
  -7 -16  -4    6.78    5.74
  -7  16  -4   -6.88    5.97
  -7  16  -4   -1.42    6.23
  -8 -16  -4   39.05    8.27
  -8  16  -4   38.07    9.00
  -8  16  -4   36.39    9.70
  -8 -17   4    8.62    7.69
  -8  17   4   18.50    8.69
  -8  17   4   16.31    8.32
  -7 -17   4   12.12    7.75
  -7  17   4    6.57    7.21
  -7  17   4    3.98    7.58
  -6 -17   4   25.71    8.15
  -6  17   4    8.77    7.46
  -6  17   4    5.25    7.16
  -5 -17   4    1.80    6.02
  -5  17   4   -7.51    5.74
  -5  17   4    6.73    6.64
  -4 -17   4   17.91    7.13
  -4  17   4   19.47    7.23
  -4  17   4   10.76    6.56
  -3 -17   4    2.19    5.59
  -3  17   4    3.68    6.25
  -3  17   4   -1.17    5.67
  -2 -17   4   -1.94    5.40
   2 -17  -4    3.47    5.44
  -2  17   4   -3.45    5.57
   2  17  -4    4.36    5.56
  -2  17   4   -1.73    5.42
  -1 -17   4    4.19    6.08
   1 -17  -4    8.90    5.68
  -1  17   4   23.05    7.03
   1  17  -4   15.61    6.53
   0 -17   4   14.11    6.27
   0 -17  -4   31.24    7.39
   0  17  -4   19.04    7.00
   0  17   4   11.82    6.44
   1 -17   4    4.73    5.74
  -1 -17  -4    4.43    5.75
  -1  17  -4    6.76    6.14
   1  17   4    9.35    6.54
  -2 -17  -4   44.10    8.83
   2 -17   4   24.73    6.98
   2  17   4   40.95    7.96
  -2  17  -4   47.20    7.49
  -2  17  -4   37.81    8.13
  -3 -17  -4    2.39    5.50
   3  17   4    9.55    5.75
  -3  17  -4   10.33    6.32
  -3  17  -4    5.89    5.53
  -4 -17  -4   39.71    8.38
  -4  17  -4   38.86    8.59
  -4  17  -4   38.29    8.03
  -5 -17  -4   28.79    7.40
  -5  17  -4   37.17    8.43
  -5  17  -4   30.37    7.99
  -6 -17  -4   -2.45    5.52
  -6  17  -4    4.06    6.43
  -6  17  -4   -0.50    6.00
  -7 -17  -4    7.62    6.19
  -7  17  -4    2.74    7.26
  -7  17  -4    5.79    7.59
  -8 -17  -4   -2.70    5.41
  -8  17  -4    0.79    7.51
  -8  17  -4    0.00    7.50
  -7 -18   4   22.43    8.44
  -7  18   4    5.51    7.86
  -7  18   4   -2.85    6.95
  -6 -18   4   -7.24    6.26
  -6  18   4    6.44    7.23
  -6  18   4   -3.04    6.30
  -5 -18   4   -2.46    6.69
  -5  18   4    5.69    6.68
  -5  18   4    1.32    6.75
  -4 -18   4   51.57    9.59
  -4  18   4   61.45   10.30
  -4  18   4   65.27   10.21
  -3 -18   4  138.78   14.25
  -3  18   4  146.79   13.48
  -3  18   4  143.51   13.90
  -2 -18   4    6.40    6.65
   2 -18  -4   16.66    6.71
  -2  18   4   18.46    7.29
   2  18  -4   13.19    6.34
  -1 -18   4   -7.50    4.97
   1 -18  -4    8.60    6.35
   1  18  -4    3.52    6.22
  -1  18   4    5.14    6.54
   0 -18  -4   47.97    8.96
   0 -18   4   30.53    7.74
   0  18  -4   37.68    8.35
   0  18   4   51.31    9.44
  -1 -18  -4   55.27    9.28
   1 -18   4   53.82    9.26
   1  18   4   50.31    8.97
  -1  18  -4   73.83   10.11
  -2 -18  -4    7.22    6.89
   2 -18   4   -3.14    5.11
  -2  18  -4    1.48    5.31
  -2  18  -4   -4.44    6.01
   2  18   4   -1.02    5.64
  -3 -18  -4   12.40    7.03
  -3  18  -4   14.98    7.32
  -3  18  -4   25.18    7.06
  -4 -18  -4   70.98   11.07
  -4  18  -4   71.63    9.65
  -4  18  -4   60.60   10.29
  -5 -18  -4   17.06    7.31
  -5  18  -4   14.02    7.28
  -5  18  -4   31.09    8.37
  -6 -18  -4    0.37    5.99
  -6  18  -4    8.09    7.17
  -6  18  -4    2.08    7.13
  -7 -18  -4    7.42    6.64
  -7  18  -4    1.72    7.13
  -7  18  -4    1.95    7.29
  -7 -19   4   -0.24    7.93
  -7  19   4   11.74    8.14
  -7  19   4   -7.52    7.14
  -6 -19   4   59.94   11.04
  -6  19   4   69.90   11.61
  -6  19   4   55.83   10.23
  -5 -19   4   17.27    7.81
  -5  19   4   18.09    8.41
  -5  19   4   14.54    7.98
  -4 -19   4   19.08    8.04
  -4  19   4   19.39    8.33
  -4  19   4   23.89    8.14
  -3 -19   4   15.82    8.07
  -3  19   4    0.62    6.68
  -2 -19   4   75.79   11.42
   2  19  -4   55.91    9.56
  -2  19   4   79.63   11.20
  -1 -19   4  166.91   15.10
   1 -19  -4  199.29   15.95
  -1  19   4  210.05   17.06
   1  19  -4  184.59   15.58
   0 -19  -4    0.17    6.24
   0 -19   4    9.04    6.74
   0  19   4    7.38    7.28
   0  19  -4    4.76    6.70
  -1 -19  -4    5.46    6.90
   1 -19   4    7.16    6.74
  -1  19  -4    3.03    6.94
   1  19   4   -5.40    6.54
   2 -19   4   25.68    7.34
  -2 -19  -4   38.48   10.00
   2  19   4   30.25    8.20
  -2  19  -4   25.02    8.33
  -3 -19  -4  102.69   12.27
  -3  19  -4  119.52   13.32
  -3  19  -4  111.20   11.42
  -4 -19  -4   13.07    7.89
  -4  19  -4    2.55    6.10
  -4  19  -4   16.18    7.80
  -5 -19  -4    9.48    7.12
  -5  19  -4    6.34    7.43
  -5  19  -4    9.84    7.03
  -6 -19  -4   81.32   12.06
  -6  19  -4   78.61   11.92
  -6  19  -4   92.31   12.44
  -6 -20   4    4.86    7.86
  -6  20   4    6.61    7.85
  -6  20   4    5.21    8.32
  -5 -20   4   -1.03    7.20
  -5  20   4    9.90    7.66
  -5  20   4   -2.62    7.43
  -4 -20   4    0.97    7.31
  -4  20   4    4.72    7.57
  -3 -20   4   13.12    8.23
  -3  20   4    0.38    7.33
  -2 -20   4    2.73    6.95
  -2  20   4    1.77    7.49
   2  20  -4   -6.25    6.52
   1 -20  -4   10.17    7.41
  -1 -20   4    2.80    6.78
   1  20  -4   -3.67    6.25
  -1  20   4   -3.01    6.86
   0 -20   4    2.31    7.01
   0 -20  -4    3.81    6.84
   0  20  -4    8.47    7.69
   0  20   4    7.33    7.87
  -1 -20  -4   -4.82    7.25
   1 -20   4    1.84    6.58
   1  20   4    8.36    7.80
  -1  20  -4   -5.18    6.73
  -2 -20  -4    3.74    7.13
   2  20   4   14.24    7.63
  -2  20  -4    9.54    7.56
  -3 -20  -4   14.17    7.96
  -3  20  -4   32.62    9.30
  -4 -20  -4    6.50    7.84
  -4  20  -4    3.18    6.45
  -4  20  -4   -1.06    7.14
  -5 -20  -4    2.11    7.74
  -5  20  -4   13.78    8.52
  -5  20  -4    3.16    6.85
  -6 -20  -4    1.31    7.59
  -6  20  -4   -7.82    7.25
  -6  20  -4    0.62    7.14
  -5 -21   4   41.93   11.32
  -5  21   4   37.34   10.06
  -4 -21   4   17.45    9.25
  -4  21   4   -8.19    7.30
  -3 -21   4   22.50    9.58
  -3  21   4    6.41    8.52
  -2 -21   4   27.98    9.47
  -2  21   4   31.09    9.72
   1 -21  -4   13.00    7.63
  -1 -21   4    9.52    7.61
  -1  21   4   13.54    8.80
   1  21  -4   12.36    7.92
   0 -21  -4   14.98    8.88
   0 -21   4    0.92    7.37
   0  21  -4    7.65    7.47
   0  21   4   -3.71    7.07
   1 -21   4    5.81    7.55
  -1 -21  -4   -0.19    7.15
   1  21   4   -8.64    6.94
  -1  21  -4   -7.00    7.53
  -2 -21  -4   55.43   11.47
  -2  21  -4   50.37   11.05
   2  21   4   41.10    9.54
  -3 -21  -4   16.92    8.99
  -3  21  -4   20.40    9.24
  -4 -21  -4   13.28    8.96
  -4  21  -4    5.89    7.98
  -5 -21  -4    1.26    8.04
  -5  21  -4    8.71    7.67
  -5  21  -4    0.76    8.14
  -4 -22   4   69.61   12.25
  -4  22   4   47.87   11.71
  -3 -22   4  110.71   15.32
  -3  22   4   80.63   12.97
  -2 -22   4   -3.97    7.82
  -2  22   4    6.10    8.40
  -1 -22   4  -10.56    7.06
   1  22  -4    6.57    7.97
  -1  22   4    0.52    7.94
   0 -22  -4   15.78    8.80
   0 -22   4    9.74    8.06
   0  22  -4    6.16    8.24
   0  22   4   23.31    9.39
   1 -22   4  137.84   15.20
  -1 -22  -4  153.99   17.95
  -1  22  -4  117.58   14.56
   1  22   4  145.54   15.53
  -2 -22  -4    5.40    8.46
  -2  22  -4   17.19    9.58
  -3 -22  -4   42.96   11.91
  -3  22  -4   37.26   10.81
  -1 -23   4   12.86    9.18
  -1  23   4   23.24   10.09
   1  23  -4   10.47    9.04
   0 -23  -4   19.43    9.80
   0 -23   4   -7.37    7.44
   0  23  -4   -2.92    7.78
   0  23   4   -0.69    8.87
  -1 -23  -4   21.02   10.02
  -1  23  -4   24.64    9.82
   1  23   4   10.05    9.16
 -11   0   5    2.44    6.67
 -10   0   5   -1.11    6.74
  -9   0   5    5.09    6.39
  -8   0   5    1.12    5.53
  -7   0   5    0.32    2.03
  -7   0   5   -3.51    4.49
  -6   0   5    0.69    2.26
  -6   0   5    3.90    4.42
  -6   0   5    1.78    2.16
  -6   0   5    1.18    2.06
  -5   0   5    1.61    2.12
  -5   0   5    0.87    2.20
  -5   0   5    1.46    2.02
  -4   0   5   -3.09    2.03
  -4   0   5   -0.56    2.14
  -4   0   5   -0.88    1.99
  -3   0   5    1.42    2.28
   3   0  -5   -0.42    1.94
  -3   0   5    0.29    2.16
  -3   0   5    0.06    2.28
   2   0  -5   -1.18    2.27
  -2   0   5   -0.17    2.09
  -2   0   5    2.20    2.22
  -2   0   5    1.51    2.34
  -1   0   5    2.80    2.59
  -1   0   5    2.45    2.35
  -1   0   5    1.14    2.27
   1   0  -5    2.47    2.39
   0   0  -5    0.45    2.45
   0   0   5    0.96    2.58
   1   0   5    1.16    2.49
  -1   0  -5   -0.80    2.44
   2   0   5    2.69    2.50
  -2   0  -5   -1.16    2.32
  -2   0  -5   -0.50    2.26
  -2   0  -5    1.13    2.39
   3   0   5   -3.65    2.23
  -3   0  -5   -0.03    2.62
  -3   0  -5    2.54    2.58
  -3   0  -5    1.58    2.46
  -4   0  -5    1.27    2.46
  -4   0  -5    1.09    2.52
   4   0   5    4.00    2.42
  -4   0  -5    0.98    2.39
  -5   0  -5    1.40    2.55
  -5   0  -5   -1.10    2.56
  -5   0  -5    2.25    2.62
  -6   0  -5   -4.51    2.50
  -6   0  -5   -0.57    2.84
  -6   0  -5    0.12    2.97
  -7   0  -5   -0.52    2.97
  -7   0  -5    2.59    3.33
  -7   0  -5    2.72    3.10
  -8   0  -5   -1.04    3.51
  -8   0  -5    1.26    3.76
  -8   0  -5    5.20    3.90
  -9   0  -5    0.37    3.87
  -9   0  -5   -2.24    4.26
  -9   0  -5    3.79    4.12
 -10   0  -5    1.40    4.75
 -10   0  -5   -1.40    5.90
 -10   0  -5   -2.86    3.59
 -10   0  -5   -4.44    4.54
 -11   0  -5    6.63    5.68
 -11   0  -5    9.66    5.55
 -11   0  -5    1.81    7.15
 -12   1   5   42.93   10.11
 -11   1   5   46.09   10.10
 -10  -1   5   44.56    8.84
 -10   1   5   50.04   10.00
  -9  -1   5   -1.43    5.52
  -9   1   5    1.46    6.44
  -8  -1   5  172.81   12.54
  -8  -1   5  189.35    7.90
  -8   1   5  175.48   13.15
  -8   1   5  200.37    7.84
  -7  -1   5  107.59   10.02
  -7  -1   5  100.86    5.73
  -7  -1   5  102.86    5.72
  -7  -1   5   96.07    5.69
  -7   1   5  115.00    5.69
  -7   1   5   96.79   10.04
  -6  -1   5  179.32    8.06
  -6  -1   5  201.21    8.16
  -6  -1   5  194.19    8.18
  -6   1   5  189.54    8.01
  -6   1   5  207.89    8.26
  -6   1   5  200.69   11.76
  -6   1   5  205.26    8.14
  -5  -1   5   96.83    5.53
  -5  -1   5  111.72    5.77
  -5  -1   5   96.96    5.37
  -5   1   5  101.95    5.65
  -5   1   5  100.91    5.57
  -5   1   5  103.58    8.69
  -5   1   5   93.13    5.35
  -4  -1   5  278.28   10.78
  -4  -1   5  278.91   10.78
  -4  -1   5  289.69   10.87
  -4   1   5  300.37   10.88
  -4   1   5  293.72   10.89
  -4   1   5  296.78   10.78
  -3  -1   5    3.50    2.38
  -3  -1   5    1.41    2.37
   3  -1  -5    3.70    1.99
  -3  -1   5   -1.93    2.20
   3   1  -5    1.19    2.06
  -3   1   5    2.37    2.43
  -3   1   5    0.83    2.53
  -3   1   5    1.02    2.12
  -2  -1   5    3.36    2.55
   2  -1  -5    1.31    2.17
  -2  -1   5    7.34    2.57
  -2  -1   5    1.57    2.24
   2   1  -5   -3.03    2.21
  -2   1   5    2.09    2.59
  -2   1   5   -1.09    2.09
  -2   1   5    0.94    2.38
  -1  -1   5  197.18    8.70
  -1  -1   5  194.15    8.40
  -1  -1   5  166.61    8.09
   1  -1  -5  189.56    8.13
  -1   1   5  182.77    8.24
   1   1  -5  183.08    8.22
  -1   1   5  183.10    8.31
  -1   1   5  175.59    8.28
   0  -1  -5    7.01    2.77
   0  -1   5    5.89    2.68
   0   1  -5   12.79    2.95
   0   1   5    7.63    2.90
   1  -1   5  423.13   14.85
  -1  -1  -5  406.44   14.92
  -1   1  -5  411.63   14.79
   1   1   5  430.13   14.91
  -2  -1  -5   27.78    3.80
   2  -1   5   31.61    3.99
  -2  -1  -5   25.60    3.60
  -2  -1  -5   26.75    3.55
  -2   1  -5   42.46    4.45
  -2   1  -5   34.15    4.00
  -2   1  -5   27.33    3.72
   2   1   5   22.71    3.53
   3  -1   5    0.41    2.42
  -3  -1  -5    0.98    2.27
  -3  -1  -5   -0.45    2.53
  -3  -1  -5    4.87    2.39
  -3   1  -5    8.21    2.76
  -3   1  -5    1.27    2.43
   3   1   5    0.59    2.34
  -3   1  -5    2.13    2.60
  -4  -1  -5  180.70    8.81
   4  -1   5  177.01    7.75
  -4  -1  -5  171.29    8.48
  -4  -1  -5  181.07    8.65
  -4   1  -5  174.08    8.53
   4   1   5  182.43    7.91
  -4   1  -5  176.52    8.65
  -4   1  -5  174.64    8.62
  -5  -1  -5  229.93   10.19
  -5  -1  -5  235.20   10.29
  -5  -1  -5  234.32   10.37
  -5   1  -5  216.46   10.17
  -5   1  -5  224.48   10.15
  -5   1  -5  212.51   10.09
  -6  -1  -5   61.65    6.17
  -6  -1  -5   71.76    6.27
  -6  -1  -5   73.74    6.30
  -6   1  -5   70.60    6.24
  -6   1  -5   70.26    6.32
  -6   1  -5   62.31    5.79
  -7  -1  -5    5.10    3.19
  -7  -1  -5   10.72    3.76
  -7  -1  -5   -0.17    3.01
  -7   1  -5    7.34    3.56
  -7   1  -5   -0.62    3.24
  -7   1  -5    0.64    3.01
  -8  -1  -5   79.85    7.24
  -8  -1  -5   72.57    7.02
  -8  -1  -5   78.23    7.20
  -8   1  -5   77.61    7.26
  -8   1  -5   82.84    7.20
  -8   1  -5   65.29    6.63
  -9  -1  -5  124.49    9.50
  -9  -1  -5  120.21    8.90
  -9  -1  -5  112.14    9.27
  -9   1  -5  122.99    9.46
  -9   1  -5  140.00    9.13
  -9   1  -5  125.69    9.38
 -10  -1  -5   70.66    8.16
 -10  -1  -5   88.87   10.90
 -10  -1  -5   70.40    8.14
 -10  -1  -5   66.06    7.41
 -10   1  -5   66.50   10.43
 -10   1  -5   82.93    8.15
 -10   1  -5   78.59    7.62
 -10   1  -5   68.72    7.72
 -11  -1  -5    2.29    5.34
 -11  -1  -5   -0.55    5.58
 -11  -1  -5    0.57    6.23
 -11   1  -5    5.56    5.38
 -11   1  -5    7.13    5.83
 -11   1  -5   14.40    8.19
 -11   2   5   22.43    9.57
 -10   2   5  125.00   13.67
  -9   2   5   25.58    8.16
  -8  -2   5   27.58    3.54
  -8  -2   5   32.41    3.83
  -8   2   5   31.38    7.54
  -7  -2   5    9.06    2.79
  -7  -2   5    9.20    2.73
  -7  -2   5   10.48    2.89
  -7   2   5   11.32    5.88
  -7   2   5   12.01    2.64
  -7   2   5   12.82    2.84
  -7   2   5   13.08    2.79
  -6  -2   5  192.31    8.32
  -6  -2   5  195.00    8.26
  -6  -2   5  171.08    8.17
  -6   2   5  193.02    8.15
  -6   2   5  178.82   11.74
  -6   2   5  212.95    8.39
  -6   2   5  203.91    8.16
  -5  -2   5  209.66    8.76
  -5  -2   5  201.80    8.65
  -5  -2   5  191.54    8.57
  -5   2   5  215.29    8.61
  -5   2   5  210.81    8.59
  -5   2   5  213.15   11.64
  -5   2   5  220.07    8.72
  -4  -2   5  194.57    8.43
  -4  -2   5  184.89    8.20
  -4  -2   5  200.87    8.45
  -4   2   5  198.43    8.33
  -4   2   5  181.45   10.48
  -4   2   5  189.99    8.19
  -4   2   5  196.99    8.32
  -3  -2   5  234.04    9.46
  -3  -2   5  233.18    9.51
  -3  -2   5  212.50    9.27
   3  -2  -5  234.37    8.56
  -3   2   5  236.73    9.59
  -3   2   5  232.29    9.43
   3   2  -5  227.43    8.68
  -3   2   5  236.17    9.43
  -2  -2   5  113.05    6.47
  -2  -2   5  122.59    6.55
   2  -2  -5  110.49    6.12
  -2  -2   5  111.45    6.36
   2   2  -5  116.26    6.17
  -2   2   5  130.63    6.67
  -2   2   5  115.70    6.29
  -2   2   5  118.34    6.57
   1  -2  -5  467.29   16.36
  -1  -2   5  488.52   17.20
  -1  -2   5  482.35   16.67
  -1   2   5  497.93   16.72
  -1   2   5  487.11   17.01
   1   2  -5  488.87   16.56
   0  -2   5   67.41    5.34
   0  -2  -5   72.56    5.79
   0   2  -5   76.66    5.65
   0   2   5   73.10    5.75
   1  -2   5   66.57    5.40
  -1  -2  -5   69.99    5.58
   1   2   5   66.82    5.39
  -1   2  -5   58.68    5.15
  -2  -2  -5   71.45    5.39
   2  -2   5   68.02    5.30
  -2  -2  -5   62.73    5.38
  -2  -2  -5   62.97    5.27
  -2   2  -5   62.06    5.24
  -2   2  -5   67.80    5.35
   2   2   5   66.98    5.32
  -2   2  -5   71.86    5.60
   3  -2   5  591.82   19.87
  -3  -2  -5  598.98   20.72
  -3  -2  -5  631.46   20.59
  -3   2  -5  590.96   20.30
   3   2   5  601.92   19.95
  -3   2  -5  611.36   20.68
  -3   2  -5  589.07   20.77
   4  -2   5  177.62    8.09
  -4  -2  -5  186.07    8.99
  -4  -2  -5  175.51    8.96
  -4  -2  -5  211.52    9.36
  -4   2  -5  186.57    8.89
  -4   2  -5  202.43    9.17
   4   2   5  184.46    8.30
  -4   2  -5  195.05    9.12
  -5  -2  -5    9.03    3.41
  -5  -2  -5   13.93    3.38
  -5  -2  -5   12.10    3.32
  -5   2  -5    9.21    3.28
  -5   2  -5   10.66    3.27
  -5   2  -5   17.82    3.58
  -6  -2  -5   89.61    7.10
  -6  -2  -5  109.18    7.42
  -6  -2  -5  104.59    7.15
  -6   2  -5  101.42    7.07
  -6   2  -5   99.78    7.19
  -6   2  -5  100.29    7.06
  -7  -2  -5   90.52    7.42
  -7  -2  -5   92.12    7.35
  -7  -2  -5   89.00    7.15
  -7   2  -5   89.18    7.11
  -7   2  -5   91.22    7.36
  -7   2  -5   93.65    7.13
  -8  -2  -5    5.29    3.90
  -8  -2  -5    2.16    3.80
  -8  -2  -5   10.19    3.88
  -8   2  -5    4.27    3.81
  -8   2  -5    8.29    3.92
  -8   2  -5    3.48    3.60
  -9  -2  -5    0.59    4.34
  -9  -2  -5   -1.66    4.09
  -9  -2  -5    3.34    4.16
  -9   2  -5   -2.21    3.62
  -9   2  -5    2.35    4.15
  -9   2  -5   -1.35    4.26
 -10  -2  -5   83.98    8.62
 -10  -2  -5   76.74    8.21
 -10  -2  -5   82.96    7.95
 -10  -2  -5   97.84   11.09
 -10   2  -5   82.06    8.36
 -10   2  -5   98.47   12.39
 -10   2  -5   75.03    8.09
 -10   2  -5   70.27    7.33
 -11  -2  -5   32.51    7.01
 -11  -2  -5   48.61    7.53
 -11   2  -5   33.77    6.65
 -11   2  -5   34.10    7.23
 -11   2  -5   42.97   10.89
 -11   3   5   13.44    8.73
 -10   3   5   21.68    8.84
  -9  -3   5   -1.33    3.20
  -9   3   5    4.56    6.63
  -8  -3   5   38.92    4.02
  -8  -3   5   29.33    4.06
  -8   3   5   24.51    7.51
  -8   3   5   36.37    3.81
  -7  -3   5   -1.69    2.68
  -7  -3   5   -1.58    2.58
  -7  -3   5    0.40    2.69
  -7   3   5   -0.38    2.37
  -7   3   5    0.96    2.73
  -7   3   5   -6.58    5.03
  -7   3   5    3.19    2.67
  -6  -3   5    4.10    2.63
  -6  -3   5   -2.22    2.41
  -6  -3   5    0.68    2.46
  -6   3   5    1.71    2.62
  -6   3   5    0.61    4.78
  -6   3   5    4.51    2.49
  -6   3   5    4.30    2.57
  -5  -3   5   35.96    3.85
  -5  -3   5   45.97    4.37
  -5  -3   5   42.04    4.24
  -5   3   5   33.09    3.81
  -5   3   5   34.37    3.82
  -5   3   5   46.64    6.75
  -5   3   5   35.02    3.82
  -4  -3   5  213.48    9.17
  -4  -3   5  221.82    9.39
  -4  -3   5  211.51    9.25
  -4   3   5  218.25    9.16
  -4   3   5  198.39   11.02
  -4   3   5  230.41    9.26
  -4   3   5  222.47    9.20
   3  -3  -5   31.16    3.21
  -3  -3   5   24.53    3.50
  -3  -3   5   18.87    3.27
  -3  -3   5   20.87    3.51
  -3   3   5   24.27    3.56
  -3   3   5   32.82    3.88
  -3   3   5   16.67    2.91
   3   3  -5   23.25    3.08
  -2  -3   5   92.51    6.09
   2  -3  -5  106.73    5.90
  -2  -3   5   88.68    6.01
  -2  -3   5   99.51    6.00
  -2   3   5  100.77    6.22
  -2   3   5   91.47    6.11
   2   3  -5  102.64    6.04
  -2   3   5   93.30    5.98
  -1  -3   5   17.32    3.31
   1  -3  -5   20.59    3.38
  -1  -3   5   19.30    3.47
  -1   3   5   17.27    3.28
  -1   3   5   20.75    3.54
  -1   3   5   15.59    3.35
   1   3  -5   23.58    3.49
   0  -3   5  325.27   12.29
   0  -3  -5  323.74   12.31
   0   3   5  302.36   12.14
   0   3  -5  312.95   12.24
   1  -3   5   29.23    3.89
  -1  -3  -5   26.36    4.10
   1   3   5   18.96    3.66
  -1   3  -5   30.09    3.98
  -2  -3  -5    2.83    2.82
  -2  -3  -5   -1.08    2.13
  -2  -3  -5    2.29    2.49
   2  -3   5    1.50    2.55
  -2   3  -5    4.39    2.66
  -2   3  -5    1.86    2.18
  -2   3  -5    1.50    2.50
   2   3   5    1.09    2.44
   3  -3   5    0.85    2.38
  -3  -3  -5    1.03    2.74
  -3  -3  -5    2.18    2.53
  -3  -3  -5    4.89    2.57
  -3   3  -5    7.17    2.93
   3   3   5    8.07    2.65
  -3   3  -5    4.73    2.77
  -3   3  -5    4.73    2.84
   4  -3   5    9.11    2.73
  -4  -3  -5   17.05    3.45
  -4  -3  -5   14.17    3.70
  -4  -3  -5    8.95    3.28
   4   3   5   14.65    3.05
  -4   3  -5   13.70    3.20
  -4   3  -5   16.06    3.77
  -4   3  -5   11.96    3.47
  -5  -3  -5    3.57    3.11
  -5  -3  -5    1.56    2.76
  -5  -3  -5   -0.85    2.81
  -5   3  -5   -0.44    2.71
  -5   3  -5   -1.89    2.82
  -5   3  -5    2.47    2.50
  -6  -3  -5   11.28    3.72
  -6  -3  -5   13.19    3.69
  -6  -3  -5    6.22    3.21
  -6   3  -5   11.76    3.70
  -6   3  -5    9.81    3.55
  -6   3  -5    6.60    3.28
  -7  -3  -5   -2.43    3.36
  -7  -3  -5   -1.03    3.07
  -7  -3  -5    2.88    3.30
  -7   3  -5    2.12    3.37
  -7   3  -5    1.40    3.23
  -7   3  -5    3.13    3.20
  -8  -3  -5   65.33    7.36
  -8  -3  -5   70.36    7.13
  -8  -3  -5   80.20    7.69
  -8   3  -5   96.19    8.09
  -8   3  -5   67.10    7.04
  -8   3  -5   87.58    7.58
  -9  -3  -5   -5.19    4.53
  -9  -3  -5    3.75    4.54
  -9  -3  -5    3.86    4.23
  -9  -3  -5    7.64    4.66
  -9   3  -5   -1.15    4.00
  -9   3  -5   -1.53    4.24
  -9   3  -5    4.13    4.07
 -10  -3  -5  -13.41    4.47
 -10  -3  -5    3.09    4.40
 -10  -3  -5    0.00    4.72
 -10   3  -5   -6.07    4.88
 -10   3  -5    0.21    7.18
 -10   3  -5    4.76    4.79
 -10   3  -5   -7.30    3.58
 -11  -3  -5   15.46    6.36
 -11  -3  -5   10.33    6.14
 -11   3  -5    0.30    7.79
 -11   3  -5    8.38    5.84
 -11   3  -5    5.69    5.50
 -11   4   5  -12.00    7.58
 -10  -4   5    1.51    3.75
 -10   4   5   -5.81    7.12
  -9  -4   5   48.28    5.30
  -9   4   5   42.27    9.27
  -8  -4   5  158.36    8.15
  -8  -4   5  155.94    8.73
  -8   4   5  161.45    7.69
  -8   4   5  148.51    8.11
  -8   4   5  159.40    8.11
  -8   4   5  157.82   13.16
  -7  -4   5    5.68    3.01
  -7  -4   5    0.33    2.80
  -7   4   5    1.57    2.77
  -7   4   5    0.00    2.74
  -7   4   5   -0.79    5.42
  -7   4   5   -2.06    2.90
  -6  -4   5  160.02    8.20
  -6  -4   5  159.01    8.14
  -6   4   5  161.45    7.95
  -6   4   5  171.93    8.23
  -6   4   5  172.60   11.69
  -6   4   5  171.96    8.16
  -5  -4   5   48.84    4.62
  -5  -4   5   47.39    4.87
  -5   4   5   57.23    4.99
  -5   4   5   59.85    7.45
  -5   4   5   53.23    4.88
  -5   4   5   55.87    4.79
  -4  -4   5    4.56    2.76
  -4  -4   5    2.96    2.55
  -4   4   5    1.45    2.69
  -4   4   5    3.13    2.66
  -4   4   5    3.40    3.97
  -4   4   5    1.63    2.57
   4   4  -5    2.96    2.04
   3  -4  -5   66.28    4.74
  -3  -4   5   53.67    5.02
  -3  -4   5   61.56    5.23
  -3   4   5   68.11    5.51
  -3   4   5   68.98    6.95
   3   4  -5   63.06    4.83
  -3   4   5   67.97    5.34
  -3   4   5   57.89    5.18
  -2  -4   5  840.84   26.34
   2  -4  -5  811.07   25.77
  -2  -4   5  825.72   26.82
   2   4  -5  808.81   25.81
  -2   4   5  801.84   26.71
  -2   4   5  811.99   26.80
  -2   4   5  787.67   26.03
   1  -4  -5  282.08   11.42
  -1  -4   5  280.43   11.60
   1   4  -5  288.04   11.41
  -1   4   5  293.05   11.56
  -1   4   5  285.11   11.60
   0  -4  -5   54.26    5.13
   0  -4   5   61.49    5.33
   0   4  -5   70.45    5.66
   0   4   5   55.05    5.29
  -1  -4  -5  225.84   10.13
   1  -4   5  223.78    9.92
  -1   4  -5  233.77   10.13
   1   4   5  210.47    9.85
  -2  -4  -5  107.48    6.86
  -2  -4  -5  123.96    7.59
  -2  -4  -5  116.80    7.12
   2  -4   5  126.07    7.15
  -2   4  -5  137.06    7.64
   2   4   5  122.23    7.27
  -2   4  -5  133.35    7.50
  -3  -4  -5  950.54   31.39
  -3  -4  -5  911.73   30.60
   3  -4   5  969.64   30.11
  -3  -4  -5  954.46   31.31
  -3   4  -5  992.08   31.42
   3   4   5  927.81   30.11
  -3   4  -5  957.93   30.71
  -4  -4  -5  311.00   13.11
  -4  -4  -5  322.78   13.27
   4  -4   5  323.35   12.17
  -4  -4  -5  308.05   13.09
   4   4   5  314.73   12.32
  -4   4  -5  338.89   13.18
  -4   4  -5  326.81   13.15
  -5  -4  -5    0.22    2.50
  -5  -4  -5   -1.09    2.65
  -5  -4  -5    0.79    2.92
  -5   4  -5    0.80    2.43
  -5   4  -5    1.64    3.00
  -6  -4  -5  204.25   10.81
  -6  -4  -5  246.73   11.30
  -6  -4  -5  196.93   10.53
  -6   4  -5  228.05   10.90
  -6   4  -5  230.39   10.99
  -7  -4  -5   61.03    6.44
  -7  -4  -5   48.05    5.79
  -7  -4  -5   55.26    6.36
  -7   4  -5   60.85    6.46
  -7   4  -5   68.41    6.77
  -7   4  -5   58.69    6.15
  -8  -4  -5    8.42    4.45
  -8  -4  -5   11.67    4.21
  -8  -4  -5    5.94    4.10
  -8   4  -5    9.18    4.54
  -8   4  -5   14.28    4.59
  -8   4  -5   14.14    4.37
  -9  -4  -5   14.27    5.13
  -9  -4  -5    4.39    4.85
  -9  -4  -5    5.26    4.41
  -9   4  -5   17.04    5.39
  -9   4  -5   12.02    4.78
  -9   4  -5   11.97    5.01
 -10  -4  -5   13.83    5.92
 -10  -4  -5   21.12    5.96
 -10  -4  -5   13.89    5.19
 -10   4  -5   16.48    5.68
 -10   4  -5   28.34    8.78
 -10   4  -5   28.01    6.44
 -10   4  -5   19.66    5.19
 -11  -4  -5    2.53    5.74
 -11  -4  -5    9.36    6.15
 -11   4  -5   -7.63    5.66
 -11   4  -5   -0.96    5.38
 -11   4  -5    4.21    8.57
 -11  -5   5   42.24    6.05
 -11   5   5   39.20   10.71
 -10  -5   5   75.27    7.09
 -10   5   5   84.30    6.92
 -10   5   5   70.59    6.39
 -10   5   5   58.44   11.19
  -9  -5   5   -0.38    4.08
  -9   5   5   -0.89    7.00
  -9   5   5    6.61    3.56
  -9   5   5    2.31    3.81
  -8  -5   5  170.87    9.37
  -8  -5   5  165.21    8.85
  -8   5   5  170.03    8.98
  -8   5   5  168.20    9.10
  -8   5   5  181.91    8.58
  -8   5   5  155.48   13.99
  -7  -5   5  280.11   12.34
  -7  -5   5  299.05   12.42
  -7   5   5  285.01   16.39
  -7   5   5  324.86   12.54
  -7   5   5  304.39   12.05
  -7   5   5  288.09   12.25
  -6  -5   5   82.27    6.31
  -6  -5   5   81.72    6.46
  -6   5   5   84.62    9.18
  -6   5   5   86.55    6.43
  -6   5   5   79.00    6.32
  -6   5   5   95.00    6.45
  -5  -5   5    1.49    2.60
  -5  -5   5    1.69    2.85
  -5   5   5    3.38    2.73
  -5   5   5    0.91    2.84
  -5   5   5    9.92    4.91
  -5   5   5    0.61    2.92
  -4  -5   5  102.62    6.86
  -4  -5   5  100.55    6.49
   4  -5  -5   98.56    5.22
   4   5  -5   99.06    5.42
  -4   5   5   98.41    6.43
  -4   5   5  112.73    6.76
  -4   5   5   95.81    6.76
  -4   5   5   99.42    8.81
  -3  -5   5  365.15   14.36
   3  -5  -5  397.67   13.65
  -3  -5   5  354.97   14.30
   3   5  -5  372.54   13.69
  -3   5   5  368.32   15.77
  -3   5   5  413.65   14.73
  -3   5   5  376.21   14.45
  -3   5   5  389.00   14.44
  -2  -5   5  402.92   15.07
   2  -5  -5  396.00   14.42
  -2  -5   5  392.58   14.93
  -2   5   5  392.68   14.79
   2   5  -5  401.80   14.57
  -2   5   5  400.30   15.10
  -2   5   5  393.65   15.03
  -1  -5   5   15.05    3.47
   1  -5  -5   10.67    3.21
  -1  -5   5   19.12    3.61
  -1   5   5   14.73    3.46
   1   5  -5   18.49    3.69
  -1   5   5   14.13    3.66
   0  -5  -5  368.36   13.40
   0  -5   5  328.63   12.99
   0   5  -5  299.94   12.77
   0   5   5  325.94   13.07
   1  -5   5  798.30   26.27
  -1  -5  -5  803.92   26.53
  -1   5  -5  804.48   26.43
   1   5   5  803.80   26.30
  -2  -5  -5   36.83    4.55
   2  -5   5   34.03    4.27
  -2  -5  -5   36.18    4.14
  -2   5  -5   36.83    4.62
  -2   5  -5   53.39    6.29
   2   5   5   44.95    5.04
   3  -5   5   -0.25    2.55
  -3  -5  -5    5.83    2.74
  -3  -5  -5   -0.51    2.25
  -3   5  -5    4.79    3.12
   3   5   5    0.62    2.51
  -3   5  -5    5.56    2.83
   4  -5   5  107.93    6.48
  -4  -5  -5   97.72    6.72
  -4  -5  -5   95.71    6.99
   4   5   5   93.82    6.36
  -4   5  -5   91.67    7.12
  -4   5  -5  109.72    7.19
  -5  -5  -5  237.30   11.26
  -5  -5  -5  209.76   10.78
  -5   5  -5  236.10   11.23
  -5   5  -5  240.63   11.11
  -6  -5  -5    1.86    3.54
  -6  -5  -5    8.86    3.77
  -6  -5  -5   11.63    3.67
  -6   5  -5    5.57    3.72
  -6   5  -5    2.10    3.40
  -7  -5  -5    1.72    3.52
  -7  -5  -5    2.10    3.25
  -7  -5  -5    5.71    3.97
  -7   5  -5   -0.90    3.66
  -7   5  -5    1.01    3.62
  -8  -5  -5  152.73   10.15
  -8  -5  -5  159.84   10.31
  -8  -5  -5  154.66   10.66
  -8   5  -5  147.54   10.27
  -8   5  -5  149.24   10.02
  -8   5  -5  157.38   10.00
  -9  -5  -5   23.84    6.00
  -9  -5  -5   24.15    5.79
  -9  -5  -5   30.79    5.93
  -9   5  -5   19.80    5.32
  -9   5  -5   29.67    5.61
  -9   5  -5   26.83    5.92
 -10  -5  -5    2.83    4.66
 -10  -5  -5    3.11    5.26
 -10  -5  -5   -4.19    5.27
 -10   5  -5    5.53    4.62
 -10   5  -5   -2.84    5.14
 -10   5  -5   -0.54    5.06
 -10   5  -5   -8.99    6.25
 -11  -5  -5   12.39    6.53
 -11  -5  -5    7.66    6.11
 -11   5  -5   -7.52    7.39
 -11   5  -5    6.94    5.88
 -11   5  -5    3.83    6.39
 -11  -6   5    0.61    4.93
 -11   6   5   -3.32    8.20
 -10  -6   5    2.11    5.03
 -10   6   5    9.72    4.83
 -10   6   5   -1.72    3.78
 -10   6   5    1.94    7.89
  -9  -6   5    9.60    4.55
  -9  -6   5    1.90    3.62
  -9   6   5   -0.01    3.98
  -9   6   5    0.47    3.92
  -9   6   5   14.83    7.56
  -8  -6   5    4.10    3.99
  -8  -6   5    1.27    3.25
  -8   6   5    7.05    3.97
  -8   6   5   -3.22    3.68
  -8   6   5    9.43    6.63
  -8   6   5    8.14    3.42
  -7  -6   5   17.68    4.01
  -7  -6   5   11.77    3.97
  -7   6   5   10.48    3.78
  -7   6   5   28.55    4.79
  -7   6   5   20.12    6.80
  -7   6   5   19.12    4.16
  -6  -6   5    1.27    3.26
  -6  -6   5   -1.34    2.92
  -6   6   5    4.09    3.39
  -6   6   5    3.00    3.24
  -6   6   5   -0.28    4.78
  -6   6   5    2.06    3.52
  -5  -6   5   -0.99    2.96
  -5  -6   5    4.05    2.88
  -5   6   5   -1.80    4.51
  -5   6   5    3.80    3.30
  -5   6   5    1.77    3.01
  -5   6   5    3.36    3.13
   4  -6  -5   18.84    2.95
  -4  -6   5   18.66    3.99
  -4  -6   5   13.97    3.50
   4   6  -5   19.08    3.15
  -4   6   5   19.72    3.76
  -4   6   5   27.26    4.33
  -4   6   5   16.08    4.00
  -4   6   5   17.00    5.26
  -3  -6   5  236.05   11.08
   3  -6  -5  253.77   10.57
  -3  -6   5  265.00   11.59
  -3   6   5  268.73   11.64
  -3   6   5  293.51   11.66
  -3   6   5  266.56   11.60
  -3   6   5  260.89   12.79
   3   6  -5  266.54   10.78
  -2  -6   5   29.29    4.37
   2  -6  -5   33.53    4.22
  -2  -6   5   30.32    4.38
  -2   6   5   38.16    4.94
  -2   6   5   34.48    4.67
   2   6  -5   29.43    4.17
  -2   6   5   35.57    4.58
  -1  -6   5  200.69    9.79
   1  -6  -5  209.35    9.78
  -1  -6   5  187.37    9.53
  -1   6   5  224.08   10.44
  -1   6   5  196.66   10.63
  -1   6   5  203.42    9.91
   1   6  -5  195.80    9.58
   0  -6   5  142.67    8.17
   0  -6  -5  140.72    8.33
   0   6   5  141.02    8.30
   0   6  -5  142.40    8.33
   1  -6   5   84.71    6.68
   1   6   5   89.61    6.85
  -1   6  -5   84.42    6.65
  -2  -6  -5  592.04   21.50
  -2  -6  -5  607.69   21.42
  -2  -6  -5  596.33   21.15
   2  -6   5  622.45   21.01
  -2   6  -5  582.21   21.40
   2   6   5  609.32   20.95
  -2   6  -5  583.62   21.03
  -3  -6  -5    5.18    2.42
  -3  -6  -5    7.30    3.12
  -3  -6  -5    1.27    2.87
   3  -6   5    3.64    3.01
  -3   6  -5    3.58    3.17
   3   6   5    8.05    3.06
  -3   6  -5    8.22    3.34
  -4  -6  -5   13.61    3.75
   4  -6   5   13.96    3.45
  -4  -6  -5   16.16    3.35
  -4  -6  -5   14.18    3.21
  -4   6  -5    8.61    3.69
  -4   6  -5   13.08    3.97
   4   6   5   16.56    3.44
  -5  -6  -5   -0.04    2.93
  -5  -6  -5    0.13    2.97
  -5  -6  -5    0.25    3.00
  -5   6  -5    3.51    3.23
  -5   6  -5    0.57    2.83
  -6  -6  -5   45.60    6.46
  -6  -6  -5   37.85    5.03
  -6   6  -5   47.45    6.09
  -6   6  -5   35.62    5.59
  -7  -6  -5   55.05    7.02
  -7  -6  -5   48.93    6.63
  -7  -6  -5   41.40    5.58
  -7   6  -5   48.24    6.32
  -7   6  -5   40.56    5.93
  -8  -6  -5   21.62    4.83
  -8  -6  -5   25.96    5.65
  -8  -6  -5   21.08    5.59
  -8   6  -5   17.55    5.12
  -8   6  -5   24.65    5.48
  -9  -6  -5   -4.74    4.53
  -9  -6  -5   -1.26    4.36
  -9  -6  -5    0.24    4.32
  -9   6  -5    8.01    4.95
  -9   6  -5   -3.16    6.31
  -9   6  -5    1.19    5.07
  -9   6  -5    3.54    4.91
 -10  -6  -5    7.11    4.95
 -10  -6  -5    0.20    5.62
 -10  -6  -5    9.91    5.42
 -10   6  -5    9.80    5.68
 -10   6  -5    2.88    4.61
 -10   6  -5   -1.04    5.19
 -10   6  -5   10.32    8.37
 -11  -6  -5   22.34    7.67
 -11  -6  -5   24.16    7.14
 -11   6  -5   10.65    9.10
 -11   6  -5   14.78    6.63
 -11   6  -5   -1.98    5.92
 -11  -7   5   32.85    6.84
 -11   7   5   23.28    5.78
 -11   7   5   19.53    5.21
 -11   7   5   35.26   10.52
 -10  -7   5   50.79    7.21
 -10   7   5   46.93   10.69
 -10   7   5   47.13    6.25
 -10   7   5   37.64    6.62
  -9  -7   5   -1.99    3.64
  -9  -7   5   -6.24    4.27
  -9   7   5    4.85    4.43
  -9   7   5    3.48    4.66
  -9   7   5    5.39    6.94
  -8  -7   5   40.73    5.80
  -8  -7   5   41.40    5.64
  -8   7   5   37.39    5.32
  -8   7   5   32.68    8.42
  -8   7   5   36.37    5.66
  -8   7   5   37.01    5.66
  -7  -7   5   37.50    5.57
  -7  -7   5   47.84    5.86
  -7   7   5   49.41    5.77
  -7   7   5   52.59    6.16
  -7   7   5   39.06    5.45
  -7   7   5   44.07    8.36
  -6  -7   5   63.10    6.44
  -6  -7   5   58.01    5.97
  -6   7   5   61.08    6.18
  -6   7   5   45.67    8.11
  -6   7   5   55.02    5.75
  -6   7   5   45.79    5.67
  -5  -7   5   -0.50    2.76
  -5  -7   5    1.55    3.43
  -5   7   5    2.82    3.30
  -5   7   5   -5.36    3.31
  -5   7   5    6.93    5.27
  -5   7   5    2.22    3.48
  -4  -7   5    9.99    3.30
   4  -7  -5    8.05    2.86
  -4  -7   5    8.84    3.74
  -4   7   5   11.62    3.84
  -4   7   5    8.72    3.74
   4   7  -5   11.07    3.14
  -4   7   5   17.14    5.22
  -4   7   5    8.93    3.37
  -3  -7   5  238.54   10.86
   3  -7  -5  239.56   10.10
  -3  -7   5  238.47   11.08
  -3   7   5  226.37   10.89
  -3   7   5  219.01   10.63
  -3   7   5  230.44   12.08
  -3   7   5  222.27   10.92
   3   7  -5  219.26   10.14
  -2  -7   5  269.06   11.87
  -2  -7   5  271.35   11.71
   2  -7  -5  268.29   11.33
   2   7  -5  241.60   11.18
  -2   7   5  259.65   11.91
  -2   7   5  274.91   11.95
  -2   7   5  247.66   11.47
   1  -7  -5   44.03    5.08
  -1  -7   5   35.34    4.84
  -1  -7   5   34.13    5.01
   1   7  -5   41.31    4.91
  -1   7   5   60.95    6.09
  -1   7   5   38.75    4.71
   0  -7   5  177.43    9.42
   0   7   5  172.73    9.50
   0   7  -5  178.69    9.45
   1  -7   5  136.45    8.45
  -1  -7  -5  150.48    8.57
   1   7   5  137.82    8.49
  -1   7  -5  140.10    8.63
  -2  -7  -5   11.73    3.17
  -2  -7  -5   19.38    4.44
  -2  -7  -5   16.16    3.40
   2  -7   5   28.73    4.41
  -2   7  -5   41.91    5.24
   2   7   5   23.78    4.19
  -2   7  -5   35.35    4.97
  -3  -7  -5   98.51    7.07
   3  -7   5   82.20    6.67
  -3  -7  -5   66.24    6.50
  -3  -7  -5   80.85    6.20
   3   7   5   80.20    6.57
  -3   7  -5   74.59    6.60
  -3   7  -5   85.75    7.49
  -4  -7  -5   54.86    5.91
  -4  -7  -5   54.69    6.41
   4  -7   5   57.49    5.57
  -4  -7  -5   49.79    5.02
   4   7   5   53.66    5.63
  -4   7  -5   51.39    5.88
  -4   7  -5   63.27    6.19
  -5  -7  -5  175.00    9.93
  -5  -7  -5  181.78   10.25
  -5  -7  -5  170.57   10.34
  -5   7  -5  182.72   10.40
  -5   7  -5  198.86   10.46
  -6  -7  -5  104.91    9.10
  -6  -7  -5  109.87    9.12
  -6  -7  -5  109.49    8.21
  -6   7  -5  112.75    8.95
  -6   7  -5  126.03    9.00
  -7  -7  -5    5.36    4.73
  -7  -7  -5    5.86    4.11
  -7   7  -5    5.43    4.48
  -7   7  -5   -2.26    3.94
  -8  -7  -5  188.46   12.57
  -8  -7  -5  219.30   12.28
  -8  -7  -5  217.69   13.00
  -8   7  -5  207.87   12.39
  -8   7  -5  213.01   12.19
  -9  -7  -5   43.42    7.10
  -9  -7  -5   33.69    6.98
  -9  -7  -5   31.39    6.10
  -9   7  -5   34.74    9.01
  -9   7  -5   37.81    6.65
  -9   7  -5   50.25    7.36
 -10  -7  -5    0.24    4.91
 -10  -7  -5    4.06    6.27
 -10  -7  -5    6.46    5.59
 -10   7  -5   -0.16    4.87
 -10   7  -5   -4.11    5.00
 -10   7  -5    5.67    7.69
 -10   7  -5    2.38    5.75
 -11  -7  -5    5.09    7.51
 -11  -7  -5   11.45    6.39
 -11   7  -5    3.31    6.33
 -11   7  -5   -3.41    7.84
 -11   7  -5    7.36    6.28
 -11  -8   5    7.71    6.38
 -11   8   5   -0.51    8.31
 -11   8   5   -4.03    5.46
 -11   8   5    0.54    4.88
 -10  -8   5   16.65    6.33
 -10   8   5   16.05    5.79
 -10   8   5    4.75    8.22
 -10   8   5   18.06    5.76
  -9  -8   5   54.08    6.68
  -9  -8   5   49.18    7.39
  -9   8   5   51.84    7.10
  -9   8   5   44.75    6.88
  -9   8   5   58.17   10.51
  -9   8   5   60.23    6.68
  -8  -8   5   86.32    7.78
  -8  -8   5   74.26    7.90
  -8   8   5   69.18    7.32
  -8   8   5   64.97    7.27
  -8   8   5   78.28    7.38
  -8   8   5   55.78   10.09
  -7  -8   5    7.36    4.36
  -7  -8   5    2.48    4.27
  -7   8   5    4.84    6.29
  -7   8   5    3.91    4.53
  -7   8   5    0.08    4.20
  -7   8   5   13.63    4.63
  -6  -8   5   24.40    4.99
  -6  -8   5   25.97    5.02
  -6   8   5   24.19    5.15
  -6   8   5   42.60    5.57
  -6   8   5   29.27    5.12
  -6   8   5   27.07    7.07
  -5  -8   5   80.61    7.45
  -5  -8   5   68.87    6.65
  -5   8   5   88.98    9.28
  -5   8   5   74.00    6.75
  -5   8   5   85.68    7.45
  -5   8   5   77.11    7.41
  -4  -8   5  312.47   13.78
  -4  -8   5  333.56   13.68
  -4   8   5  292.84   15.11
  -4   8   5  307.91   13.56
   4   8  -5  308.12   12.43
  -4   8   5  294.77   13.40
  -4   8   5  306.57   13.81
  -3  -8   5  126.74    8.34
  -3  -8   5  121.56    7.82
   3  -8  -5  116.94    7.38
  -3   8   5  107.57    8.80
  -3   8   5  102.74    8.13
  -3   8   5  113.48    7.73
  -3   8   5  115.76    8.16
   3   8  -5  122.78    7.72
  -2  -8   5  114.49    7.80
   2  -8  -5  101.68    7.40
  -2  -8   5  108.69    7.28
  -2   8   5  112.82    7.91
   2   8  -5  103.04    7.48
  -2   8   5  100.08    7.93
  -2   8   5   85.21    7.05
  -1  -8   5  631.58   22.30
  -1   8   5  613.74   22.39
   1   8  -5  608.56   21.69
  -1   8   5  609.51   22.13
   0  -8   5  513.37   19.16
   0  -8  -5  485.23   18.76
   0   8  -5  523.98   19.07
   0   8   5  510.83   19.09
  -1  -8  -5    3.22    3.38
   1  -8   5    4.76    3.28
  -1   8  -5    2.71    3.29
   1   8   5    3.69    3.39
  -2  -8  -5  127.81    8.61
  -2  -8  -5  120.26    7.48
   2  -8   5  115.46    8.01
  -2   8  -5  117.07    8.57
  -2   8  -5  115.80    8.37
   2   8   5  117.80    8.07
   3  -8   5  620.69   22.01
  -3  -8  -5  615.58   22.85
  -3  -8  -5  627.73   23.18
  -3  -8  -5  627.77   22.80
  -3   8  -5  642.55   23.03
  -3   8  -5  572.69   22.31
   3   8   5  654.86   22.35
   4  -8   5   28.00    4.43
  -4  -8  -5   19.68    3.81
  -4  -8  -5   19.01    4.43
  -4  -8  -5   28.37    5.06
  -4   8  -5   21.86    4.59
  -4   8  -5   23.49    4.41
   4   8   5   27.46    4.65
  -5  -8  -5   10.88    3.40
  -5  -8  -5   10.11    4.34
  -5  -8  -5   12.30    4.44
  -5   8  -5    7.02    4.01
  -5   8  -5   18.97    5.08
  -6  -8  -5  135.69    9.98
  -6  -8  -5  144.46   10.00
  -6  -8  -5  137.27    9.24
  -6   8  -5  139.51   10.12
  -6   8  -5  133.06    9.65
  -7  -8  -5  183.17   11.71
  -7  -8  -5  201.24   11.45
  -7  -8  -5  194.11   12.17
  -7   8  -5  199.76   12.18
  -7   8  -5  193.50   11.84
  -8  -8  -5    6.40    5.56
  -8  -8  -5   10.69    4.45
  -8   8  -5    5.78    5.16
  -8   8  -5   17.35    6.02
  -9  -8  -5   -2.25    5.68
  -9  -8  -5    0.24    4.77
  -9  -8  -5   -0.81    4.85
  -9   8  -5    9.04    6.87
  -9   8  -5    0.77    5.40
  -9   8  -5    2.85    5.08
 -10  -8  -5   85.17    9.94
 -10  -8  -5   93.28    9.88
 -10   8  -5   71.46   12.03
 -10   8  -5   73.04    8.76
 -10   8  -5   65.79    8.80
 -11  -9   5   17.95    7.22
 -11   9   5   -7.75    7.89
 -11   9   5    0.54    5.43
 -10  -9   5   11.57    6.84
 -10   9   5   -6.38    7.56
 -10   9   5    2.10    5.79
 -10   9   5    2.76    5.40
  -9  -9   5   19.33    6.52
  -9  -9   5   21.55    5.41
  -9   9   5   13.20    6.02
  -9   9   5   19.81    6.31
  -9   9   5   15.27    5.23
  -9   9   5   12.88    8.08
  -8  -9   5    6.01    4.76
  -8  -9   5   -1.43    4.25
  -8   9   5    3.45    4.38
  -8   9   5    0.17    6.56
  -8   9   5    2.54    4.83
  -8   9   5    0.88    5.14
  -7  -9   5   -0.23    4.01
  -7  -9   5   10.76    4.98
  -7   9   5   15.61    6.97
  -7   9   5    4.11    4.60
  -7   9   5    8.04    4.94
  -7   9   5   11.22    4.74
  -6  -9   5    7.44    4.12
  -6  -9   5    1.43    4.10
  -6   9   5   13.78    4.65
  -6   9   5    8.05    5.96
  -6   9   5    9.11    4.28
  -6   9   5    4.81    4.31
  -5  -9   5    0.44    3.62
  -5  -9   5   -0.21    3.71
  -5   9   5    0.99    4.01
  -5   9   5   -0.54    3.94
  -5   9   5    0.52    5.06
  -5   9   5   -1.98    3.50
  -4  -9   5   63.21    7.03
  -4  -9   5   83.17    7.61
  -4   9   5   70.99    8.50
  -4   9   5   83.93    7.69
   4   9  -5   61.73    5.94
  -4   9   5   72.12    7.34
  -4   9   5   90.90    8.29
  -3  -9   5  131.52    8.22
  -3  -9   5  116.18    8.53
   3  -9  -5  115.06    7.80
  -3   9   5  118.25    8.30
   3   9  -5  121.68    8.02
  -3   9   5  114.23    8.72
  -3   9   5  116.46    8.43
  -3   9   5  131.38    9.58
  -2  -9   5   49.36    5.65
  -2  -9   5   43.35    5.74
   2  -9  -5   46.70    5.79
  -2   9   5   49.73    6.10
  -2   9   5   59.10    6.90
  -2   9   5   47.68    6.38
  -2   9   5   47.92    5.99
   2   9  -5   35.99    5.18
  -1  -9   5  150.00    9.49
   1  -9  -5  153.01    9.15
   1   9  -5  165.45    9.39
  -1   9   5  170.12    9.97
  -1   9   5  155.93    9.27
   0  -9  -5  292.05   13.16
   0  -9   5  291.80   13.21
   0   9   5  269.07   13.05
   0   9  -5  283.48   13.13
  -1  -9  -5   53.38    5.90
   1  -9   5   68.37    6.85
   1   9   5   53.29    5.95
  -1   9  -5   46.12    5.99
   2  -9   5  368.15   15.62
  -2  -9  -5  391.88   16.22
  -2  -9  -5  376.23   15.87
   2   9   5  376.02   15.84
  -2   9  -5  390.73   16.22
  -2   9  -5  403.37   16.41
  -3  -9  -5    6.58    3.65
   3  -9   5    4.63    3.42
  -3  -9  -5    9.29    4.28
  -3  -9  -5    0.23    2.38
   3   9   5    0.31    3.32
  -3   9  -5    4.96    3.77
  -3   9  -5   10.20    4.00
  -4  -9  -5  102.85    8.42
   4  -9   5  114.29    7.84
  -4  -9  -5  105.34    7.82
  -4  -9  -5   82.44    8.36
  -4   9  -5  100.27    8.73
  -4   9  -5  100.29    8.69
   4   9   5  127.46    8.41
  -5  -9  -5   34.72    6.56
  -5  -9  -5   28.59    4.49
  -5  -9  -5   24.22    5.15
  -5   9  -5   25.08    5.50
  -5   9  -5   23.77    5.16
  -6  -9  -5   18.14    4.66
  -6  -9  -5    4.74    4.51
  -6   9  -5   12.40    4.97
  -6   9  -5   18.86    5.47
  -7  -9  -5   26.19    5.32
  -7  -9  -5   28.48    6.07
  -7   9  -5   32.74    6.53
  -7   9  -5   34.01    6.22
  -8  -9  -5   19.33    5.90
  -8  -9  -5    8.84    4.45
  -8   9  -5    9.63    5.68
  -8   9  -5   16.09    5.67
  -9  -9  -5    9.88    6.21
  -9  -9  -5    8.68    5.75
  -9   9  -5   -3.27    5.23
  -9   9  -5    3.09    6.88
  -9   9  -5    4.70    5.50
 -10  -9  -5    6.67    6.10
 -10  -9  -5    1.24    6.19
 -10   9  -5    6.05    5.95
 -10   9  -5    5.32    7.65
 -10 -10   5   17.22    7.30
 -10 -10   5   22.94    6.04
 -10  10   5   13.55    6.85
 -10  10   5   20.91    6.55
 -10  10   5    0.72    8.31
  -9 -10   5   11.88    5.63
  -9 -10   5    2.64    5.74
  -9  10   5   21.08    5.91
  -9  10   5   15.78    6.27
  -9  10   5   12.36    6.27
  -9  10   5   12.70    7.96
  -8 -10   5   -1.23    4.81
  -8 -10   5    4.63    4.93
  -8  10   5    3.35    5.24
  -8  10   5   -6.13    5.92
  -8  10   5    2.76    4.94
  -8  10   5    6.05    5.60
  -7 -10   5    4.69    4.45
  -7 -10   5    6.98    5.21
  -7  10   5   14.43    7.13
  -7  10   5    3.26    5.39
  -7  10   5   22.47    5.72
  -7  10   5   11.84    5.02
  -6 -10   5    5.14    4.61
  -6 -10   5   11.63    4.44
  -6  10   5   -2.30    4.56
  -6  10   5    8.77    4.14
  -6  10   5    5.08    5.83
  -6  10   5    1.82    5.00
  -5 -10   5   66.31    7.32
  -5 -10   5   59.55    7.14
  -5  10   5   66.05    7.59
  -5  10   5   55.87    7.08
  -5  10   5   54.29    8.15
  -5  10   5   52.70    6.50
  -4 -10   5   41.19    5.55
  -4 -10   5   35.36    5.95
  -4  10   5   49.22    7.13
  -4  10   5   38.81    7.15
  -4  10   5   38.92    6.08
  -4  10   5   37.53    5.57
  -3 -10   5  115.91    8.31
   3 -10  -5  128.53    8.56
  -3 -10   5  114.83    8.94
  -3  10   5  132.69    9.30
  -3  10   5  139.20    9.65
  -3  10   5  128.54    9.79
  -3  10   5  136.33    8.94
   3  10  -5  132.06    8.81
  -2 -10   5   30.97    4.86
  -2 -10   5   26.08    5.34
  -2  10   5   31.19    5.15
  -2  10   5   30.20    5.66
   2  10  -5   24.14    4.83
  -2  10   5   20.01    5.23
  -2  10   5   30.99    5.65
  -1 -10   5   64.52    7.06
   1 -10  -5   54.42    6.24
  -1  10   5   51.95    6.69
   1  10  -5   61.56    6.47
  -1  10   5   53.22    6.00
   0 -10   5    1.20    3.50
   0 -10  -5   -0.15    3.47
   0  10  -5   -2.31    3.45
   0  10   5    0.85    3.62
  -1 -10  -5   69.84    7.20
   1 -10   5   64.17    6.76
   1  10   5   60.80    6.73
  -1  10  -5   71.33    7.29
   2 -10   5   39.59    5.40
  -2 -10  -5   27.71    5.15
  -2  10  -5   43.77    6.18
   2  10   5   38.05    5.68
   3 -10   5   33.91    5.40
  -3 -10  -5   25.24    5.09
  -3  10  -5   26.70    5.44
   3  10   5   27.48    5.20
  -4 -10  -5   95.74    8.74
  -4 -10  -5   87.95    8.94
   4 -10   5   98.66    7.83
  -4  10  -5   99.30    8.86
   4  10   5  100.81    8.25
  -5 -10  -5    5.01    3.34
  -5 -10  -5    2.04    4.10
  -5  10  -5    1.47    4.32
  -6 -10  -5   -3.90    3.82
  -6 -10  -5    1.04    3.52
  -6  10  -5    3.34    4.76
  -7 -10  -5   18.12    4.97
  -7 -10  -5   10.29    5.33
  -7  10  -5   29.53    6.62
  -8 -10  -5   44.99    7.63
  -8 -10  -5   43.11    7.77
  -8  10  -5   49.28    8.01
  -9 -10  -5   23.32    6.57
  -9  10  -5   22.03    7.04
  -9  10  -5    8.88    7.57
 -10 -10  -5   25.65    7.77
 -10 -10  -5   22.92    6.98
 -10  10  -5   28.27    7.16
 -10  10  -5   14.74    8.79
 -10 -11   5    3.32    5.73
 -10 -11   5   18.54    7.59
 -10  11   5    9.09    7.15
 -10  11   5    1.46    6.43
 -10  11   5   14.20    9.24
  -9 -11   5    6.03    6.22
  -9 -11   5   -4.03    4.79
  -9  11   5    1.56    5.81
  -9  11   5   -2.00    6.06
  -9  11   5   -4.02    7.00
  -9  11   5   -3.12    5.42
  -8 -11   5    6.06    5.26
  -8 -11   5   -1.90    5.36
  -8  11   5    3.91    5.52
  -8  11   5   -3.03    5.67
  -8  11   5    5.84    5.55
  -8  11   5   -0.84    6.84
  -7 -11   5   61.49    7.79
  -7 -11   5   53.56    7.55
  -7  11   5   67.79    8.57
  -7  11   5   65.32    8.43
  -7  11   5   59.98   10.17
  -7  11   5   57.28    7.75
  -6 -11   5  127.44   10.18
  -6 -11   5  146.77   11.14
  -6  11   5  151.43   10.95
  -6  11   5  167.75   14.08
  -6  11   5  155.18   11.31
  -6  11   5  149.00   11.35
  -5 -11   5    3.06    4.00
  -5 -11   5    0.30    4.21
  -5  11   5    6.06    4.13
  -5  11   5    3.04    5.01
  -5  11   5   -6.50    4.42
  -5  11   5    0.13    5.46
  -4 -11   5  176.57   11.55
  -4 -11   5  185.55   11.01
  -4  11   5  186.09   11.73
  -4  11   5  203.37   11.51
  -4  11   5  192.93   11.84
  -4  11   5  209.93   13.02
  -3 -11   5  425.92   18.56
  -3 -11   5  418.20   18.16
   3 -11  -5  454.63   17.81
  -3  11   5  450.42   18.56
  -3  11   5  442.46   18.53
  -3  11   5  441.62   19.21
   3  11  -5  424.61   17.62
  -2 -11   5  180.31   11.06
   2 -11  -5  170.68   10.10
  -2  11   5  175.23   10.49
  -2  11   5  164.00   10.61
  -2  11   5  161.40   10.93
   2  11  -5  158.30   10.30
  -1 -11   5   43.65    6.38
   1 -11  -5   34.95    5.52
   1  11  -5   41.37    5.78
  -1  11   5   41.19    6.45
   0 -11  -5   45.26    6.52
   0 -11   5   44.18    6.14
   0  11  -5   32.62    5.61
   0  11   5   32.92    5.71
   1 -11   5  173.77   10.36
  -1 -11  -5  150.80   10.46
   1  11   5  151.26   10.36
  -1  11  -5  160.96   10.52
   2 -11   5  110.77    8.99
  -2 -11  -5   80.97    7.91
  -2  11  -5   90.83    8.36
   2  11   5   97.18    8.76
   3 -11   5    0.41    3.45
  -3 -11  -5   -5.02    3.29
   3  11   5   -0.74    3.70
  -3  11  -5   -4.59    3.57
  -4 -11  -5   83.80    8.83
  -4  11  -5   81.35    8.53
   4  11   5   71.29    7.48
  -5 -11  -5   63.64    8.35
  -5  11  -5   74.36    8.35
  -6 -11  -5   -2.38    4.25
  -6  11  -5   10.60    5.37
  -7 -11  -5    5.99    4.96
  -7  11  -5    2.65    5.17
  -8 -11  -5   34.55    7.21
  -8  11  -5   30.93    8.48
  -8  11  -5   34.20    7.48
  -9  11  -5   98.40   13.54
  -9  11  -5   90.84   10.65
 -10 -11  -5    5.02    7.02
 -10  11  -5    5.84    6.28
 -10  11  -5   14.17    8.60
 -10 -12   5    6.33    6.28
 -10 -12   5   10.38    7.30
 -10  12   5   -3.67    8.06
 -10  12   5   13.54    7.64
  -9 -12   5   -5.44    5.62
  -9 -12   5   -9.72    5.04
  -9  12   5   -3.27    5.63
  -9  12   5   -5.41    5.59
  -9  12   5    3.41    6.48
  -9  12   5    8.99    8.02
  -8 -12   5   66.96    8.70
  -8 -12   5   64.52    8.83
  -8  12   5   62.89    8.58
  -8  12   5   42.39   10.04
  -8  12   5   65.23    8.91
  -8  12   5   78.64    9.34
  -7 -12   5    1.46    4.54
  -7 -12   5   -0.07    5.29
  -7  12   5    1.56    6.37
  -7  12   5   -0.53    5.58
  -7  12   5    4.24    4.72
  -6 -12   5   23.36    6.69
  -6 -12   5   40.25    7.00
  -6  12   5   24.78    6.84
  -6  12   5   37.19    8.31
  -6  12   5   32.61    6.70
  -5 -12   5   21.77    5.12
  -5 -12   5   27.90    6.08
  -5  12   5    9.30    6.43
  -5  12   5   24.03    5.83
  -5  12   5   19.93    6.29
  -4 -12   5   99.73    9.71
  -4  12   5  120.57   11.26
  -4  12   5  120.31    9.35
  -4  12   5  102.03    9.55
  -3 -12   5   19.48    5.37
  -3  12   5   11.57    5.47
   3  12  -5   15.27    4.85
  -3  12   5   17.53    5.55
   2 -12  -5   44.63    5.98
  -2 -12   5   63.51    7.78
  -2  12   5   39.30    6.75
  -2  12   5   52.38    6.98
   2  12  -5   46.66    6.49
  -1 -12   5   20.13    5.23
   1 -12  -5   20.45    5.20
   1  12  -5   25.87    5.59
  -1  12   5   25.41    5.83
   0 -12  -5   92.60    9.15
   0 -12   5   97.14    8.94
   0  12  -5   94.05    8.52
   0  12   5   86.83    8.55
   1 -12   5   27.38    5.46
  -1 -12  -5   21.89    5.65
  -1  12  -5   31.56    6.02
   1  12   5   28.91    5.80
  -2 -12  -5  145.31   10.94
   2 -12   5  161.57   10.69
   2  12   5  178.97   11.13
  -2  12  -5  162.22   11.17
  -3 -12  -5   77.39    9.15
   3 -12   5   75.19    7.90
  -3  12  -5   89.71    8.99
   3  12   5   80.23    8.21
  -4 -12  -5   12.26    5.00
   4  12   5   13.88    5.00
  -4  12  -5    8.34    4.71
  -5 -12  -5   22.73    5.88
  -5  12  -5   35.30    6.63
  -6 -12  -5   29.79    6.35
  -6  12  -5   39.75    7.45
  -7 -12  -5   43.30    7.21
  -7  12  -5   65.01    8.99
  -8 -12  -5    0.30    5.24
  -8  12  -5    0.42    6.88
  -8  12  -5    5.90    6.41
  -9 -12  -5   -0.59    5.54
  -9  12  -5    8.23    7.77
  -9  12  -5    3.89    6.49
  -9 -13   5    1.35    6.48
  -9 -13   5    9.98    6.71
  -9  13   5   11.77    6.54
  -9  13   5   -0.19    7.68
  -8 -13   5   -3.06    5.70
  -8  13   5   -2.33    6.39
  -8  13   5    4.56    5.77
  -8  13   5   -2.66    7.04
  -7 -13   5   41.16    7.90
  -7  13   5   30.29    7.08
  -7  13   5   25.77    8.50
  -7  13   5   50.34    8.41
  -6 -13   5   60.71    8.63
  -6  13   5   55.74    9.57
  -6  13   5   67.36    8.51
  -6  13   5   51.92    8.28
  -5 -13   5   27.23    6.56
  -5  13   5   32.99    7.37
  -5  13   5   37.40    7.71
  -5  13   5   42.77    8.24
  -4 -13   5    8.76    4.94
  -4  13   5   14.73    6.52
  -4  13   5    7.74    5.49
  -3 -13   5   14.32    5.16
  -3  13   5    2.67    5.20
  -3  13   5    9.13    5.26
   3  13  -5    8.41    4.75
   2 -13  -5    0.74    3.97
  -2 -13   5    4.41    4.55
   2  13  -5   11.57    4.84
  -2  13   5   10.06    5.00
  -2  13   5    5.81    5.22
  -1 -13   5   33.60    6.72
   1 -13  -5   31.44    5.89
   1  13  -5   18.96    5.50
  -1  13   5   33.56    6.44
   0 -13  -5   30.16    5.98
   0 -13   5   28.02    6.10
   0  13   5   28.67    6.23
   0  13  -5   32.83    6.10
  -1 -13  -5   14.11    5.07
   1 -13   5   14.04    5.17
  -1  13  -5   11.63    5.26
   1  13   5    9.18    5.02
  -2 -13  -5    0.56    4.52
   2 -13   5    6.15    4.76
   2  13   5    2.61    4.59
  -2  13  -5    4.47    4.87
   3 -13   5   -1.19    3.96
  -3 -13  -5   -2.66    4.23
  -3  13  -5   -1.18    4.44
   3  13   5    8.91    4.91
  -4 -13  -5    4.96    4.69
  -4  13  -5    0.59    4.51
  -5 -13  -5   13.99    5.32
  -5  13  -5   18.65    6.02
  -6 -13  -5   31.12    6.99
  -6  13  -5   34.58    7.59
  -7 -13  -5    0.72    4.99
  -7  13  -5    3.72    6.48
  -7  13  -5    5.65    6.37
  -8 -13  -5    7.54    5.76
  -8  13  -5   -5.91    5.72
  -8  13  -5    8.89    7.44
  -9 -13  -5    9.20    6.33
  -9  13  -5    0.47    6.06
  -9  13  -5   -2.22    7.13
  -9 -14   5  119.83   12.32
  -9  14   5  142.68   13.25
  -9  14   5   99.49   14.02
  -8 -14   5   17.51    7.65
  -8  14   5   20.13    8.95
  -8  14   5   36.04    8.37
  -7 -14   5   -4.26    6.17
  -7  14   5    7.25    7.31
  -7  14   5  -12.58    5.78
  -6 -14   5   59.02    8.99
  -6  14   5   37.22    8.21
  -6  14   5   39.71    8.90
  -5 -14   5  365.27   18.77
  -5  14   5  374.90   18.70
  -5  14   5  364.95   19.77
  -4 -14   5  115.46   11.12
  -4  14   5   91.93   10.28
  -4  14   5  111.29   11.46
  -3 -14   5    2.52    4.97
  -3  14   5   -1.72    5.12
  -3  14   5    2.71    5.05
   3  14  -5   -0.76    4.36
  -2 -14   5   30.59    6.66
   2 -14  -5   43.74    7.04
  -2  14   5   59.61    7.83
  -2  14   5   54.28    8.27
   2  14  -5   38.33    6.99
   1 -14  -5  167.43   12.15
  -1 -14   5  176.58   12.66
   1  14  -5  190.94   12.51
  -1  14   5  209.74   13.20
   0 -14  -5   28.81    6.19
   0 -14   5    4.15    4.71
   0  14  -5   24.76    6.11
   0  14   5   20.31    6.12
   1 -14   5  106.22   10.09
  -1 -14  -5  146.77   11.40
   1  14   5  123.06   10.67
  -1  14  -5  127.60   11.40
  -2 -14  -5  118.88   10.83
   2 -14   5  127.51   11.01
   2  14   5  115.28   10.68
  -2  14  -5  118.29   11.09
   3 -14   5    0.45    4.56
  -3 -14  -5   -0.01    4.36
  -3  14  -5   10.66    5.72
   3  14   5    2.54    4.99
  -4 -14  -5   16.79    6.42
  -4  14  -5   34.78    6.96
  -5 -14  -5    3.17    4.82
  -5  14  -5    2.18    5.33
  -6 -14  -5   47.31    7.68
  -6  14  -5   56.69    8.74
  -7 -14  -5   32.94    7.31
  -7  14  -5   36.12    9.00
  -7  14  -5   35.24    8.11
  -8 -14  -5    4.74    6.27
  -8  14  -5    7.26    7.45
  -8  14  -5   14.14    7.14
  -9 -14  -5   -4.54    5.41
  -9  14  -5    8.91    7.18
  -9  14  -5    2.00    7.51
  -9 -15   5    6.00    7.60
  -9  15   5   -8.64    7.92
  -9  15   5   11.23    7.84
  -8 -15   5   47.38    9.41
  -8  15   5   51.03    9.71
  -8  15   5   38.99   10.10
  -7 -15   5    7.86    6.90
  -7  15   5    6.10    6.97
  -7  15   5   -2.62    7.02
  -6 -15   5   43.31    8.66
  -6  15   5   35.33    8.86
  -6  15   5   30.49    7.97
  -5 -15   5   16.56    6.79
  -5  15   5   27.53    8.33
  -5  15   5   32.81    7.65
  -4 -15   5   14.71    6.14
  -4  15   5   26.95    7.24
  -4  15   5   26.79    7.42
  -3 -15   5    6.80    5.62
   3  15  -5   35.59    6.96
  -3  15   5   20.29    6.61
  -3  15   5   20.82    6.82
  -2 -15   5   13.52    5.86
   2 -15  -5   20.25    6.05
   2  15  -5    8.36    5.49
  -2  15   5    8.65    5.88
   1 -15  -5    3.59    5.05
  -1 -15   5    9.02    5.84
  -1  15   5    8.35    5.57
   1  15  -5    8.29    5.45
   0 -15  -5  107.06   11.27
   0 -15   5  120.53   11.34
   0  15   5  111.38   10.92
   0  15  -5  112.26   10.76
   1 -15   5   52.15    7.83
  -1 -15  -5   58.46    9.05
  -1  15  -5   51.60    8.27
   1  15   5   49.74    7.96
   2 -15   5   55.92    8.11
  -2 -15  -5   39.53    7.84
   2  15   5   48.89    7.78
  -2  15  -5   37.42    7.29
  -3 -15  -5    1.49    4.83
   3 -15   5    0.31    4.70
   3  15   5    4.36    5.50
  -3  15  -5    4.03    5.34
  -4 -15  -5   33.67    7.33
  -4  15  -5   25.43    7.31
  -5 -15  -5   59.78    8.59
  -5  15  -5   61.35    9.28
  -6 -15  -5   21.40    6.80
  -6  15  -5   16.20    7.48
  -6  15  -5   17.20    7.11
  -7 -15  -5   -5.07    4.31
  -7  15  -5   -5.30    5.80
  -7  15  -5    0.07    6.59
  -8 -15  -5    0.02    5.46
  -8  15  -5    0.38    7.03
  -8  15  -5    4.30    6.85
  -8 -16   5    1.18    6.87
  -8  16   5    4.43    8.24
  -8  16   5   12.34    8.43
  -7 -16   5   -2.66    5.96
  -7  16   5    8.89    8.05
  -7  16   5    5.64    6.85
  -6 -16   5   -0.94    5.91
  -6  16   5   -3.32    6.90
  -6  16   5   -7.35    6.18
  -5 -16   5    6.15    6.01
  -5  16   5    2.04    6.19
  -5  16   5   -7.41    6.28
  -4 -16   5   23.46    7.26
  -4  16   5   26.20    8.06
  -4  16   5   18.71    6.85
  -3 -16   5   21.43    7.28
  -3  16   5   12.91    7.02
  -3  16   5   28.03    7.46
  -2 -16   5   15.07    6.47
   2 -16  -5   32.88    7.33
   2  16  -5   29.78    7.12
  -2  16   5   27.13    7.14
   1 -16  -5    7.76    5.60
  -1 -16   5   13.15    6.07
  -1  16   5    6.94    6.10
   1  16  -5   24.33    6.75
   0 -16  -5    0.40    5.70
   0 -16   5   -0.77    5.18
   0  16  -5    9.47    6.06
   0  16   5   15.78    6.63
   1 -16   5   56.52    8.27
  -1 -16  -5   57.15    9.53
   1  16   5   70.58    9.35
  -1  16  -5   37.54    7.87
   2 -16   5    1.74    5.26
  -2 -16  -5   -2.69    5.67
  -2  16  -5    4.11    5.90
   2  16   5   -2.55    5.32
  -3 -16  -5    4.57    5.51
   3  16   5    2.16    5.43
  -3  16  -5   13.54    6.48
  -4 -16  -5    0.09    5.28
  -4  16  -5   -3.34    5.41
  -5 -16  -5   -2.66    4.84
  -5  16  -5   -5.20    5.42
  -5  16  -5   -3.59    5.45
  -6 -16  -5   -6.71    5.22
  -6  16  -5    0.76    5.84
  -6  16  -5    0.62    6.11
  -7 -16  -5    3.87    5.36
  -7  16  -5   11.26    7.22
  -7  16  -5   -5.54    6.04
  -8 -16  -5    4.78    6.32
  -8  16  -5    3.04    7.75
  -8  16  -5   -3.73    6.96
  -8 -17   5   -1.31    7.32
  -8  17   5   -9.61    7.61
  -8  17   5   -2.64    7.29
  -7 -17   5   94.87   12.47
  -7  17   5  100.02   12.26
  -7  17   5   86.50   13.01
  -6 -17   5   17.21    7.56
  -6  17   5   16.29    7.70
  -6  17   5   11.30    7.88
  -5 -17   5   -3.13    5.70
  -5  17   5   -1.23    7.09
  -5  17   5  -10.03    5.55
  -4 -17   5   23.22    7.14
  -4  17   5   36.06    8.20
  -4  17   5   33.93    8.44
  -3 -17   5  134.03   12.94
  -3  17   5  145.98   13.01
  -3  17   5  100.78   11.76
   2 -17  -5  112.47   11.57
  -2 -17   5  153.14   14.32
   2  17  -5  159.31   13.11
  -2  17   5  141.35   13.34
   1 -17  -5    4.94    5.58
  -1 -17   5   -4.98    5.54
   1  17  -5    3.25    5.72
  -1  17   5   -3.81    5.69
   0 -17  -5   81.06   11.01
   0 -17   5   66.05    9.62
   0  17  -5   65.00    9.51
   0  17   5   61.69    9.76
   1 -17   5  272.68   16.65
  -1 -17  -5  254.64   17.07
   1  17   5  245.68   16.51
  -1  17  -5  279.85   16.83
   2 -17   5  142.55   12.98
  -2 -17  -5  113.02   11.95
   2  17   5  149.76   13.37
  -2  17  -5  107.99   11.82
  -3 -17  -5    4.59    6.30
   3  17   5    7.06    5.80
  -3  17  -5    3.61    6.06
  -4 -17  -5   76.27   10.52
  -4  17  -5   97.36   10.70
  -4  17  -5   81.00   10.56
  -5 -17  -5  110.50   12.58
  -5  17  -5  128.08   12.76
  -5  17  -5  132.10   13.57
  -6 -17  -5   15.21    6.97
  -6  17  -5    9.83    7.33
  -6  17  -5   12.56    6.75
  -7 -17  -5   21.82    7.15
  -7  17  -5   44.03    9.51
  -7  17  -5   18.14    8.18
  -7 -18   5    6.51    7.79
  -7  18   5   19.04    9.34
  -7  18   5    2.42    7.85
  -6 -18   5   20.69    8.53
  -6  18   5   -5.98    6.98
  -6  18   5   23.18    8.48
  -5 -18   5   12.64    7.49
  -5  18   5   18.55    7.85
  -5  18   5    1.30    7.61
  -4 -18   5   11.27    6.99
  -4  18   5   13.41    7.45
  -4  18   5    9.63    7.27
  -3 -18   5   -2.30    6.08
  -3  18   5    7.08    7.06
  -3  18   5    8.53    6.78
  -2 -18   5   10.56    7.08
   2  18  -5   17.84    6.95
  -2  18   5   16.83    7.66
   1 -18  -5   56.77    9.10
  -1 -18   5   67.77   10.61
   1  18  -5   54.78    9.24
  -1  18   5   64.48   10.24
   0 -18   5    3.81    6.20
   0 -18  -5    8.80    6.60
   0  18   5    2.05    7.01
   0  18  -5    1.46    6.71
  -1 -18  -5   39.00    8.79
   1 -18   5   26.67    7.40
  -1  18  -5   31.58    8.39
   1  18   5   25.69    7.91
  -2 -18  -5    9.11    6.85
   2 -18   5    5.81    5.97
  -2  18  -5    5.44    6.71
   2  18   5    2.99    6.52
  -3 -18  -5    3.24    6.68
  -3  18  -5   13.71    7.43
  -3  18  -5    3.45    5.69
  -4 -18  -5   38.49    9.81
  -4  18  -5   33.48    7.93
  -4  18  -5   30.89    8.74
  -5 -18  -5    1.96    6.58
  -5  18  -5    8.80    7.28
  -5  18  -5   16.74    7.50
  -6 -18  -5   -0.23    5.91
  -6  18  -5   25.71    8.36
  -6  18  -5   13.31    7.52
  -7 -18  -5   50.17    9.80
  -7  18  -5   79.92   11.69
  -7  18  -5   78.26   12.09
  -6 -19   5   10.32    8.02
  -6  19   5   -6.88    7.22
  -6  19   5   -5.64    7.73
  -5 -19   5   11.38    7.70
  -5  19   5   10.98    8.40
  -5  19   5    3.59    7.32
  -4 -19   5    3.78    7.37
  -4  19   5    3.61    7.12
  -4  19   5   -1.69    7.57
  -3 -19   5    5.52    7.35
  -3  19   5   12.47    7.45
  -2 -19   5   19.57    8.75
   2  19  -5   18.30    7.40
  -2  19   5    9.35    7.15
   1 -19  -5   10.62    7.85
  -1 -19   5    4.34    6.98
  -1  19   5    8.13    7.42
   1  19  -5    7.05    6.98
   0 -19  -5    5.83    6.86
   0 -19   5   -6.09    5.87
   0  19   5   -1.94    6.43
   0  19  -5   -2.01    6.37
  -1 -19  -5   14.54    7.45
   1 -19   5    3.56    6.58
  -1  19  -5    9.27    7.77
   1  19   5    3.11    6.67
  -2 -19  -5   36.88   10.22
   2 -19   5   37.60    8.36
  -2  19  -5   34.03    9.05
   2  19   5   53.44    9.92
  -3 -19  -5    6.79    7.19
  -3  19  -5    2.11    5.86
  -3  19  -5    8.40    7.70
  -4 -19  -5    2.06    7.10
  -4  19  -5   -5.87    5.46
  -4  19  -5   -9.90    6.01
  -5 -19  -5   -5.77    6.34
  -5  19  -5   -1.79    6.29
  -5  19  -5   10.74    7.93
  -6 -19  -5   -9.73    5.87
  -6  19  -5   11.41    7.79
  -6  19  -5    9.93    8.35
  -6  20   5    4.15    8.41
  -5 -20   5   66.01   11.69
  -5  20   5   51.28   10.61
  -5  20   5   82.47   13.29
  -4 -20   5   34.55    9.86
  -4  20   5   19.60    8.77
  -3 -20   5    6.11    7.90
  -3  20   5    8.17    8.11
  -2 -20   5   38.40    9.67
  -2  20   5   60.64   10.87
  -1 -20   5   91.89   12.77
   1 -20  -5  110.57   13.24
  -1  20   5  103.66   13.09
   1  20  -5  103.78   12.49
   0 -20  -5   58.20   10.93
   0 -20   5   44.33   10.18
   0  20   5   32.74    9.22
   0  20  -5   59.11   10.30
  -1 -20  -5   -2.42    6.78
   1 -20   5    0.74    6.90
   1  20   5   -2.74    6.71
  -1  20  -5   -8.31    6.44
  -2 -20  -5   18.71    8.89
  -2  20  -5    5.52    7.88
   2  20   5    8.03    7.64
  -3 -20  -5   80.87   12.20
  -3  20  -5  106.21   13.49
  -4 -20  -5   -5.77    6.52
  -4  20  -5    2.30    7.80
  -4  20  -5   -0.05    6.53
  -5 -20  -5   22.79    9.47
  -5  20  -5   14.83    7.78
  -5  20  -5    7.59    8.36
  -4 -21   5   39.60   10.79
  -4  21   5   17.62    9.06
  -3 -21   5   53.50   10.85
  -3  21   5   37.80   10.49
  -2 -21   5   10.15    8.50
  -2  21   5   11.33    8.72
  -1 -21   5    6.59    8.38
  -1  21   5   10.33    8.41
   1  21  -5   -1.88    7.17
   0 -21   5    0.41    7.56
   0 -21  -5    9.47    8.13
   0  21   5   -6.85    7.68
   0  21  -5   -5.07    6.98
  -1 -21  -5   49.02   10.28
   1 -21   5   54.83   10.63
  -1  21  -5   48.43   10.53
   1  21   5   47.61   10.86
  -2 -21  -5   65.76   12.98
   2  21   5   48.18   10.41
  -2  21  -5   32.75   10.06
  -3 -21  -5   -4.74    6.87
  -3  21  -5    0.80    7.61
  -4 -21  -5   30.18    9.79
  -4  21  -5   21.28    9.72
  -3 -22   5   35.23   10.39
  -3  22   5   10.25    9.23
  -2 -22   5   15.28    9.86
  -2  22   5   22.37    9.54
  -1 -22   5    7.85    8.80
   1  22  -5    0.35    8.01
  -1  22   5   -6.12    8.07
   0 -22   5    9.36    8.19
   0 -22  -5   -7.73    6.94
   0  22  -5    7.20    8.72
   0  22   5    9.02    9.13
   1 -22   5    8.89    7.89
  -1 -22  -5   16.71    9.81
  -1  22  -5    0.43    8.30
   1  22   5   14.26    9.14
  -2 -22  -5    0.85    8.01
  -2  22  -5   10.71    9.18
  -3 -22  -5   17.62   10.22
  -3  22  -5   15.67    9.49
  -8   0   6   60.22    5.10
  -8   0   6   66.08    5.23
  -8   0   6   58.32    4.83
  -7   0   6    8.62    2.96
  -7   0   6    6.76    2.76
  -7   0   6    6.56    2.75
  -6   0   6  181.04    8.43
  -6   0   6  186.71    8.53
  -6   0   6  192.18    8.65
  -5   0   6  222.21    9.68
  -5   0   6  233.47    9.79
  -5   0   6  241.67    9.89
  -4   0   6  616.03   20.90
  -4   0   6  621.44   20.60
  -4   0   6  621.65   20.96
  -3   0   6  411.85   14.91
  -3   0   6  408.30   14.77
   3   0  -6  417.21   13.99
  -3   0   6  388.34   14.68
   2   0  -6  123.78    6.73
  -2   0   6  116.52    6.82
  -2   0   6  119.93    7.07
  -2   0   6  126.55    7.02
  -1   0   6   -0.13    2.60
  -1   0   6    7.13    2.98
   1   0  -6   -0.14    2.43
   0   0  -6  167.68    8.49
   0   0   6  190.94    8.96
  -1   0  -6  483.98   17.17
   1   0   6  478.95   17.12
   2   0   6  312.73   12.09
  -2   0  -6  291.92   12.11
  -2   0  -6  292.45   12.24
  -2   0  -6  303.97   12.31
   3   0   6    0.20    2.54
  -3   0  -6    3.99    2.75
  -3   0  -6    2.74    2.83
  -3   0  -6    3.31    2.57
   4   0   6  362.25   13.68
  -4   0  -6  356.28   14.44
  -4   0  -6  363.16   14.42
  -4   0  -6  384.09   14.82
  -5   0  -6  235.89   11.39
  -5   0  -6  268.88   11.70
  -5   0  -6  265.28   11.84
  -6   0  -6  136.49    8.19
  -6   0  -6  110.74    8.19
  -6   0  -6  111.32    8.04
  -7   0  -6  142.73    9.14
  -7   0  -6  142.63    9.21
  -7   0  -6  135.18    9.11
  -8   0  -6   87.39    8.33
  -8   0  -6   95.80    8.28
  -8   0  -6   83.55    8.01
  -9   0  -6   57.85    7.23
  -9   0  -6   79.10    8.12
  -9   0  -6   73.72    7.82
 -10   0  -6   42.61    9.05
 -10   0  -6   30.53    6.72
 -10   0  -6   33.14    6.52
 -10   0  -6   35.38    6.36
 -11   0  -6    2.26    5.87
 -11   0  -6   18.12    7.99
 -11   0  -6   13.85    6.59
 -10   1   6    5.06    7.38
  -9  -1   6   91.99    6.77
  -9   1   6  101.70   11.83
  -8  -1   6   41.05    4.18
  -8  -1   6   39.69    4.39
  -8  -1   6   43.61    4.54
  -8   1   6   36.74    4.14
  -8   1   6   34.18    7.86
  -8   1   6   37.00    4.30
  -8   1   6   35.97    4.24
  -7  -1   6    9.35    3.09
  -7  -1   6   10.89    3.08
  -7  -1   6    9.33    3.09
  -7   1   6    9.72    5.78
  -7   1   6   20.11    3.52
  -7   1   6    9.03    2.93
  -7   1   6   14.03    3.10
  -6  -1   6   35.03    4.02
  -6  -1   6   33.05    4.10
  -6  -1   6   30.87    3.98
  -6   1   6   39.42    4.19
  -6   1   6   36.21    4.00
  -6   1   6   32.22    3.97
  -5  -1   6  167.07    7.81
  -5  -1   6  162.42    7.90
  -5  -1   6  167.67    7.92
  -5   1   6  146.05    7.60
  -5   1   6  162.69    7.91
  -5   1   6  153.09    7.84
  -4  -1   6  230.62   10.02
  -4  -1   6  244.88   10.07
  -4  -1   6  235.44   10.05
  -4   1   6  241.59   10.11
  -4   1   6  236.29   10.10
  -4   1   6  245.16   10.12
  -3  -1   6   55.43    4.82
  -3  -1   6   51.90    4.80
  -3  -1   6   58.80    5.01
   3  -1  -6   50.86    4.27
   3   1  -6   54.90    4.25
  -3   1   6   47.31    4.83
  -3   1   6   52.34    4.99
  -3   1   6   55.09    4.70
  -2  -1   6    0.98    2.61
  -2  -1   6   -0.85    2.54
  -2  -1   6    0.63    2.38
   2  -1  -6    1.16    2.37
  -2   1   6   -0.71    2.29
  -2   1   6    2.01    2.60
   2   1  -6    2.87    2.53
  -2   1   6   -2.58    2.48
  -1  -1   6  109.65    6.89
   1  -1  -6  106.62    6.60
  -1  -1   6  111.42    6.57
  -1  -1   6  116.32    7.21
   1   1  -6  102.25    6.73
  -1   1   6  113.79    6.87
  -1   1   6  113.87    6.99
   0  -1   6   65.01    5.53
   0  -1  -6   62.80    5.34
   0   1  -6   55.48    5.24
   0   1   6   42.62    4.72
  -1  -1  -6   10.80    3.34
   1  -1   6   15.36    3.38
   1   1   6   17.79    3.69
  -1   1  -6   19.31    3.70
  -2  -1  -6  163.13    8.44
  -2  -1  -6  166.70    8.65
  -2  -1  -6  156.45    8.18
   2  -1   6  153.14    8.21
   2   1   6  173.05    8.37
  -2   1  -6  162.10    8.48
  -2   1  -6  157.25    8.23
   3  -1   6   49.03    4.93
  -3  -1  -6   54.87    5.61
  -3  -1  -6   65.58    5.85
  -3  -1  -6   54.76    5.22
  -3   1  -6   48.15    5.21
   3   1   6   49.73    4.86
  -3   1  -6   45.16    4.49
  -3   1  -6   49.46    4.92
  -4  -1  -6   42.62    4.79
  -4  -1  -6   38.40    4.96
  -4  -1  -6   43.08    4.41
   4  -1   6   26.10    3.80
  -4   1  -6   33.98    4.74
  -4   1  -6   38.58    4.57
  -4   1  -6   35.92    4.61
   4   1   6   44.07    4.59
  -5  -1  -6    7.60    2.96
  -5  -1  -6   10.80    3.72
  -5  -1  -6    6.82    2.85
  -5   1  -6   12.10    3.82
  -5   1  -6   11.76    3.34
  -5   1  -6   10.21    3.16
  -6  -1  -6   75.19    6.98
  -6  -1  -6   73.85    6.67
  -6  -1  -6   69.74    6.61
  -6   1  -6   64.08    6.51
  -6   1  -6   69.48    6.62
  -6   1  -6   73.42    6.97
  -7  -1  -6    0.03    3.46
  -7  -1  -6    1.88    3.62
  -7  -1  -6    5.06    3.89
  -7   1  -6    5.25    3.92
  -7   1  -6    4.63    3.78
  -7   1  -6    0.59    3.43
  -8  -1  -6   -6.55    3.38
  -8  -1  -6    3.75    4.23
  -8  -1  -6    2.09    3.97
  -8   1  -6    8.67    4.16
  -8   1  -6    1.62    3.99
  -8   1  -6    4.30    4.24
  -9  -1  -6    4.13    4.65
  -9  -1  -6    0.12    4.55
  -9  -1  -6    2.95    4.34
  -9   1  -6   -1.49    3.84
  -9   1  -6    0.02    4.45
  -9   1  -6    3.48    4.48
 -10  -1  -6    4.37    4.83
 -10  -1  -6    3.04    5.24
 -10  -1  -6   18.80    7.51
 -10  -1  -6   11.10    6.01
 -10   1  -6   16.01    5.80
 -10   1  -6    0.22    4.47
 -10   1  -6    5.49    5.15
 -10   1  -6    1.10    6.40
 -11  -1  -6   39.28    7.77
 -11  -1  -6   38.99    7.76
 -11   1  -6   42.32    7.45
 -11   1  -6   32.64    7.58
 -11   1  -6   23.17    9.11
 -11   2   6    6.86    8.44
 -10   2   6    0.69    6.82
  -9  -2   6    2.03    3.32
  -9  -2   6   -3.76    2.92
  -9   2   6   10.51    7.03
  -8  -2   6   11.81    3.53
  -8  -2   6    9.50    3.49
  -8  -2   6   13.42    3.36
  -8   2   6   17.29    3.34
  -8   2   6   19.66    7.13
  -8   2   6   18.43    3.65
  -8   2   6   18.95    3.75
  -7  -2   6   65.40    5.45
  -7  -2   6   56.81    5.19
  -7  -2   6   62.30    5.21
  -7   2   6   57.48    5.09
  -7   2   6   58.67    8.83
  -7   2   6   59.33    5.08
  -7   2   6   61.21    5.20
  -6  -2   6  216.09    9.58
  -6  -2   6  225.05    9.70
  -6  -2   6  220.82    9.75
  -6   2   6  224.08   13.18
  -6   2   6  213.58    9.57
  -6   2   6  228.90    9.63
  -6   2   6  220.76    9.66
  -5  -2   6   76.66    5.82
  -5  -2   6   76.04    5.79
  -5  -2   6   65.76    5.40
  -5   2   6   74.31    5.55
  -5   2   6   66.84    5.47
  -5   2   6   71.09    5.63
  -4  -2   6   38.59    4.41
  -4  -2   6   39.13    4.52
  -4  -2   6   32.82    4.01
  -4   2   6   32.58    4.10
  -4   2   6   36.97    4.00
  -4   2   6   31.74    4.03
  -3  -2   6  293.07   11.68
  -3  -2   6  303.74   11.83
   3  -2  -6  289.59   10.81
  -3  -2   6  285.12   11.65
  -3   2   6  287.98   11.64
  -3   2   6  302.21   11.97
  -3   2   6  282.76   11.56
   3   2  -6  290.32   10.97
  -2  -2   6   46.05    4.40
  -2  -2   6   49.10    4.77
  -2  -2   6   50.41    4.95
   2  -2  -6   52.15    4.57
  -2   2   6   44.45    4.51
  -2   2   6   37.81    4.45
  -2   2   6   44.41    4.51
   2   2  -6   52.74    4.79
   1  -2  -6  318.43   12.40
  -1  -2   6  307.87   12.62
  -1  -2   6  316.74   12.56
  -1  -2   6  323.59   13.18
  -1   2   6  397.98   14.47
   1   2  -6  323.95   12.49
  -1   2   6  316.12   12.69
  -1   2   6  284.54   12.42
   0  -2   6  292.76   12.16
   0  -2  -6  309.38   12.24
   0   2   6  292.03   12.05
   0   2  -6  305.21   12.14
   1  -2   6   92.75    6.56
  -1  -2  -6   98.21    6.96
  -1   2  -6   98.43    6.71
   1   2   6   97.74    6.73
  -2  -2  -6  129.95    8.08
  -2  -2  -6  141.84    7.95
  -2  -2  -6  138.80    7.84
   2  -2   6  134.02    7.74
  -2   2  -6  145.43    7.97
   2   2   6  149.00    7.95
  -2   2  -6  144.74    7.80
  -2   2  -6  142.30    7.69
  -3  -2  -6   -1.37    2.48
  -3  -2  -6    2.08    2.65
   3  -2   6    0.02    2.52
  -3  -2  -6    1.69    2.91
   3   2   6    3.85    2.63
  -3   2  -6   -2.84    2.13
  -3   2  -6    1.35    2.66
  -3   2  -6   -2.17    2.50
   4  -2   6   85.51    5.91
  -4  -2  -6   77.12    6.15
  -4  -2  -6   78.59    6.26
  -4  -2  -6   79.76    6.81
   4   2   6   83.24    5.99
  -4   2  -6   87.95    6.33
  -4   2  -6   89.38    6.94
  -4   2  -6   80.90    6.25
  -5  -2  -6  289.86   12.64
  -5  -2  -6  276.57   12.62
  -5  -2  -6  273.15   12.49
  -5   2  -6  307.55   12.68
  -5   2  -6  288.48   12.70
  -5   2  -6  305.82   12.80
  -6  -2  -6    1.70    3.21
  -6  -2  -6   -2.87    2.89
  -6  -2  -6    1.23    3.63
  -6   2  -6    3.01    3.47
  -6   2  -6    4.40    3.34
  -6   2  -6    0.20    3.30
  -7  -2  -6   64.67    6.88
  -7  -2  -6   70.94    7.09
  -7  -2  -6   72.08    7.28
  -7   2  -6   65.81    6.92
  -7   2  -6   53.19    6.05
  -7   2  -6   55.40    6.66
  -8  -2  -6   58.13    6.97
  -8  -2  -6   74.81    8.13
  -8  -2  -6   68.37    7.49
  -8   2  -6   61.77    7.18
  -8   2  -6   77.81    7.45
  -8   2  -6   70.31    7.30
  -9  -2  -6   21.16    5.93
  -9  -2  -6   39.52    6.64
  -9  -2  -6   31.20    6.06
  -9   2  -6   34.95    6.41
  -9   2  -6   28.09    5.77
  -9   2  -6   38.40    6.23
 -10  -2  -6    4.37    4.89
 -10  -2  -6    3.54    5.48
 -10  -2  -6   -0.36    5.54
 -10  -2  -6    0.92    4.88
 -10   2  -6   -2.23    4.43
 -10   2  -6  -12.00    4.71
 -10   2  -6   -2.92    7.18
 -10   2  -6   -4.38    4.93
 -11  -2  -6    7.65    6.41
 -11  -2  -6    5.59    5.75
 -11   2  -6    8.91    6.72
 -11   2  -6    6.91    6.02
 -11   2  -6    1.52    8.17
 -11   3   6   63.70   12.16
 -10  -3   6    7.66    4.11
 -10   3   6   15.39    8.29
  -9  -3   6   33.21    4.69
  -9   3   6   22.31    8.23
  -9   3   6   28.75    4.30
  -9   3   6   39.29    4.97
  -8  -3   6  101.32    6.97
  -8  -3   6   99.63    7.46
  -8   3   6  107.65    6.61
  -8   3   6  104.41    7.20
  -8   3   6  106.75    7.19
  -8   3   6  127.69   12.38
  -7  -3   6   -1.52    2.92
  -7  -3   6   -0.19    2.97
  -7  -3   6    4.78    3.02
  -7   3   6   -0.19    2.65
  -7   3   6    9.27    5.85
  -7   3   6    8.48    3.35
  -7   3   6    6.30    3.18
  -6  -3   6  121.33    7.19
  -6  -3   6  116.04    7.14
  -6  -3   6  105.12    6.92
  -6   3   6  115.49   10.72
  -6   3   6  103.26    6.81
  -6   3   6  109.03    6.73
  -6   3   6  117.34    7.15
  -5  -3   6   78.84    6.22
  -5  -3   6   74.19    5.91
  -5  -3   6   79.85    6.15
  -5   3   6   93.02    6.33
  -5   3   6   77.49    6.08
  -5   3   6   88.20    6.11
  -5   3   6   81.45    8.38
  -4  -3   6    1.18    2.79
   4  -3  -6   -1.96    1.95
  -4  -3   6    1.06    2.76
  -4  -3   6    1.08    2.50
  -4   3   6    0.93    2.73
  -4   3   6    3.11    2.88
   4   3  -6    0.84    2.04
  -4   3   6    0.26    2.54
  -3  -3   6    8.35    2.98
  -3  -3   6    9.56    2.87
  -3  -3   6   10.08    3.32
   3  -3  -6   10.71    2.72
  -3   3   6    8.50    3.18
  -3   3   6    9.88    2.90
  -3   3   6   11.45    3.37
   3   3  -6    6.17    2.60
  -2  -3   6  353.34   13.46
  -2  -3   6  331.04   13.22
   2  -3  -6  333.15   12.75
  -2  -3   6  344.09   13.44
  -2   3   6  328.73   13.09
   2   3  -6  337.10   12.82
  -2   3   6  343.91   13.29
  -2   3   6  358.92   13.63
  -1  -3   6  836.73   27.16
  -1  -3   6  861.74   27.90
   1  -3  -6  845.40   27.04
  -1   3   6  814.50   27.72
  -1   3   6  795.80   27.67
  -1   3   6  867.65   27.24
   1   3  -6  836.09   26.95
   0  -3   6  778.79   24.86
   0  -3  -6  742.70   24.71
   0   3   6  725.62   24.65
   0   3  -6  743.20   24.70
  -1  -3  -6   85.88    6.86
   1  -3   6  105.51    6.93
   1   3   6   96.14    6.73
  -1   3  -6   94.75    6.89
  -2  -3  -6  559.18   20.97
  -2  -3  -6  715.71   23.11
   2  -3   6  605.41   20.58
  -2  -3  -6  595.49   20.96
  -2   3  -6  591.35   21.12
  -2   3  -6  570.57   21.05
   2   3   6  587.45   20.62
  -2   3  -6  591.51   20.80
  -3  -3  -6  970.61   31.96
  -3  -3  -6  961.31   32.07
  -3  -3  -6  985.27   31.39
   3  -3   6  943.09   30.60
  -3   3  -6  932.51   31.87
  -3   3  -6  958.57   31.27
   3   3   6  989.72   30.84
  -4  -3  -6  295.96   12.76
  -4  -3  -6  294.95   12.64
   4  -3   6  278.17   11.67
  -4  -3  -6  275.32   12.46
  -4   3  -6  302.57   12.71
  -4   3  -6  269.98   12.34
  -4   3  -6  312.41   12.70
   4   3   6  293.50   11.80
  -5  -3  -6   18.63    3.83
  -5  -3  -6    9.58    3.65
  -5  -3  -6   16.51    3.75
  -5   3  -6   15.92    3.72
  -5   3  -6   17.62    4.09
  -5   3  -6   13.59    3.71
  -6  -3  -6  191.12   10.80
  -6  -3  -6  212.15   11.01
  -6  -3  -6  185.54   10.72
  -6   3  -6  235.34   11.21
  -6   3  -6  204.12   10.92
  -6   3  -6  214.36   10.80
  -7  -3  -6   37.91    5.94
  -7  -3  -6   34.34    5.49
  -7  -3  -6   30.15    5.83
  -7   3  -6   31.60    5.60
  -7   3  -6   21.64    5.05
  -7   3  -6   27.78    5.41
  -8  -3  -6    7.07    4.72
  -8  -3  -6   15.57    4.96
  -8  -3  -6   13.62    4.96
  -8   3  -6   16.27    4.81
  -8   3  -6   10.57    4.32
  -8   3  -6   13.13    5.13
  -9  -3  -6   10.01    5.52
  -9  -3  -6   14.38    5.05
  -9  -3  -6   -0.25    4.43
  -9   3  -6    1.50    4.39
  -9   3  -6    9.47    4.84
  -9   3  -6   -0.03    4.80
 -10  -3  -6   24.85    6.56
 -10  -3  -6   11.52    5.59
 -10  -3  -6    7.94    5.51
 -10   3  -6    8.93    5.96
 -10   3  -6   13.41    5.82
 -10   3  -6   16.10    5.59
 -10   3  -6    7.85    7.43
 -11  -3  -6   15.88    6.87
 -11  -3  -6   -4.29    6.25
 -11   3  -6    5.09    8.03
 -11   3  -6    8.92    6.29
 -11   3  -6    6.19    6.37
 -11   4   6   44.70   10.92
 -10  -4   6   78.91    7.10
 -10   4   6  101.49    7.99
 -10   4   6   89.74    7.38
 -10   4   6   79.69   12.35
  -9  -4   6   10.20    4.08
  -9   4   6    9.69    7.50
  -9   4   6    1.88    3.53
  -9   4   6    2.34    3.99
  -8  -4   6   75.84    6.49
  -8  -4   6   88.63    6.62
  -8   4   6   65.77    5.94
  -8   4   6   89.88    6.32
  -8   4   6   70.78    6.37
  -8   4   6   81.81   10.89
  -7  -4   6   67.86    5.85
  -7  -4   6   61.59    5.85
  -7   4   6   62.27    9.08
  -7   4   6   74.53    5.84
  -7   4   6   63.14    5.74
  -7   4   6   61.71    5.82
  -6  -4   6   96.13    7.11
  -6  -4   6   99.87    6.96
  -6   4   6  100.95    9.99
  -6   4   6   94.86    6.92
  -6   4   6  111.43    7.22
  -6   4   6  104.54    6.80
  -5  -4   6   25.22    4.05
  -5  -4   6   31.64    4.48
  -5   4   6   29.02    4.30
  -5   4   6   32.20    6.28
  -5   4   6   26.65    4.15
  -5   4   6   28.91    4.24
  -4  -4   6   42.12    4.84
  -4  -4   6   40.88    4.68
   4  -4  -6   40.89    3.59
  -4  -4   6   41.11    4.63
  -4   4   6   41.44    4.71
   4   4  -6   37.38    3.63
  -4   4   6   42.39    4.78
  -4   4   6   45.10    5.09
  -3  -4   6    0.54    2.94
  -3  -4   6    5.84    2.82
   3  -4  -6    1.88    2.42
  -3   4   6    5.79    3.32
  -3   4   6    2.11    2.47
  -3   4   6    4.63    3.02
   3   4  -6    4.41    2.74
  -2  -4   6   79.58    6.15
  -2  -4   6   70.03    5.59
   2  -4  -6   70.89    5.65
  -2   4   6   70.78    6.36
   2   4  -6   76.26    5.86
  -2   4   6   60.24    5.52
  -1  -4   6    1.04    2.59
   1  -4  -6    3.46    2.93
  -1  -4   6   -0.43    2.81
  -1   4   6    0.19    2.89
   1   4  -6    3.29    2.94
  -1   4   6    0.80    2.52
  -1   4   6    1.26    2.83
   0  -4  -6  151.90    8.47
   0  -4   6  156.85    8.56
   0   4  -6  149.70    8.42
   0   4   6  156.66    8.58
   1  -4   6    6.84    3.04
  -1  -4  -6    2.26    3.04
  -1   4  -6    6.18    3.18
   1   4   6    7.33    3.16
  -2  -4  -6  248.90   11.27
  -2  -4  -6  268.15   11.74
   2  -4   6  273.10   11.30
  -2  -4  -6  269.67   11.84
  -2   4  -6  259.81   11.47
  -2   4  -6  239.43   11.30
   2   4   6  259.34   11.29
  -2   4  -6  273.13   11.80
   3  -4   6   25.95    4.12
  -3  -4  -6   27.20    4.42
  -3  -4  -6   20.06    3.49
  -3  -4  -6   24.32    3.86
  -3   4  -6   15.89    3.40
  -3   4  -6   21.51    3.77
   3   4   6   14.39    3.57
  -3   4  -6   15.31    3.83
   4  -4   6    3.99    2.81
  -4  -4  -6    4.10    2.86
  -4  -4  -6    4.46    3.25
  -4  -4  -6    5.84    3.06
   4   4   6    3.85    2.87
  -4   4  -6    3.61    2.76
  -4   4  -6    6.77    3.15
  -4   4  -6    2.17    2.98
  -5  -4  -6   27.42    4.83
  -5  -4  -6   26.54    4.46
  -5  -4  -6   45.72    5.81
  -5   4  -6   19.72    4.13
  -5   4  -6   27.66    4.81
  -5   4  -6   24.79    4.22
  -6  -4  -6    8.11    3.72
  -6  -4  -6   14.77    4.08
  -6  -4  -6   12.19    4.17
  -6   4  -6    0.56    3.65
  -6   4  -6    6.38    3.63
  -6   4  -6    9.76    3.55
  -7  -4  -6   72.22    7.51
  -7  -4  -6   61.06    6.98
  -7  -4  -6   40.85    6.21
  -7   4  -6   46.99    6.01
  -7   4  -6   62.45    6.92
  -7   4  -6   62.56    7.14
  -8  -4  -6   53.05    6.98
  -8  -4  -6   46.64    6.64
  -8  -4  -6   49.39    6.65
  -8   4  -6   48.35    6.67
  -8   4  -6   45.40    6.54
  -8   4  -6   53.59    6.96
  -9  -4  -6  109.82    9.89
  -9  -4  -6  128.67   10.46
  -9  -4  -6  130.78   10.32
  -9   4  -6  135.03   10.48
  -9   4  -6  114.87   10.22
  -9   4  -6  121.28   10.28
 -10  -4  -6   13.34    5.63
 -10  -4  -6    6.45    5.32
 -10  -4  -6    8.15    5.03
 -10   4  -6    5.41    7.55
 -10   4  -6   -3.19    5.39
 -10   4  -6   -2.83    4.42
 -10   4  -6    0.60    5.05
 -11  -4  -6   -2.21    6.66
 -11  -4  -6    7.23    6.17
 -11   4  -6    1.52    6.02
 -11   4  -6   -0.81    6.30
 -11   4  -6    2.68    7.55
 -11  -5   6    4.01    4.78
 -11   5   6   -7.73    7.76
 -10  -5   6    0.56    4.56
 -10   5   6    5.99    4.69
 -10   5   6    1.58    7.97
 -10   5   6    2.28    3.83
  -9  -5   6   44.91    5.36
  -9  -5   6   31.27    5.49
  -9   5   6   55.82   10.07
  -9   5   6   42.47    5.52
  -9   5   6   34.73    5.55
  -8  -5   6   34.52    4.90
  -8  -5   6   17.05    4.56
  -8   5   6   34.35    8.59
  -8   5   6   22.77    4.62
  -8   5   6   20.40    4.65
  -8   5   6   25.13    4.22
  -7  -5   6   45.47    5.33
  -7  -5   6   38.48    5.13
  -7   5   6   34.15    5.09
  -7   5   6   39.07    7.91
  -7   5   6   42.20    4.99
  -7   5   6   37.52    4.94
  -6  -5   6    0.78    3.14
  -6  -5   6    1.14    3.03
  -6   5   6    2.17    3.53
  -6   5   6    3.55    3.33
  -6   5   6    7.64    5.47
  -6   5   6   -0.38    3.13
  -5  -5   6   72.86    6.11
  -5  -5   6   69.94    6.35
  -5   5   6   65.90    6.03
  -5   5   6   71.33    6.44
  -5   5   6   62.43    8.39
  -5   5   6   66.65    6.01
  -4  -5   6   50.91    5.23
   4  -5  -6   46.10    4.10
  -4  -5   6   53.16    5.57
  -4   5   6   50.28    6.98
  -4   5   6   45.79    5.26
  -4   5   6   53.82    5.23
   4   5  -6   42.65    4.18
  -4   5   6   49.35    5.04
  -3  -5   6  148.00    8.37
   3  -5  -6  169.15    8.00
  -3  -5   6  167.53    8.92
  -3   5   6  158.23    8.80
  -3   5   6  160.97    8.74
  -3   5   6  163.70    8.55
   3   5  -6  170.51    8.20
  -2  -5   6   93.69    6.66
  -2  -5   6   82.33    6.27
   2  -5  -6   80.88    6.38
   2   5  -6   87.84    6.46
  -2   5   6   89.51    6.73
  -2   5   6   83.94    6.32
  -2   5   6   97.45    6.96
   1  -5  -6  238.94   10.99
  -1  -5   6  255.52   11.23
  -1  -5   6  258.97   11.17
  -1   5   6  249.83   11.38
   1   5  -6  245.09   11.03
  -1   5   6  236.80   11.10
   0  -5  -6  169.30    9.15
   0  -5   6  165.05    9.06
   0   5   6  173.33    9.20
   0   5  -6  171.41    9.13
   1  -5   6  167.76    9.16
  -1  -5  -6  201.00    9.93
  -1   5  -6  183.51    9.52
   1   5   6  187.24    9.59
  -2  -5  -6   60.61    6.11
  -2  -5  -6   52.22    5.78
   2  -5   6   74.25    6.41
  -2  -5  -6   69.28    6.90
  -2   5  -6   73.82    6.74
  -2   5  -6   56.62    5.37
   2   5   6   62.41    5.89
  -2   5  -6   73.27    6.70
  -3  -5  -6  304.64   13.19
   3  -5   6  284.14   12.37
  -3  -5  -6  280.55   12.91
  -3  -5  -6  315.70   13.10
  -3   5  -6  295.93   13.01
  -3   5  -6  312.51   13.08
   3   5   6  301.74   12.57
   4  -5   6   25.84    4.10
  -4  -5  -6   21.76    3.75
  -4  -5  -6   21.31    4.24
  -4  -5  -6   24.08    4.52
  -4   5  -6   30.40    4.50
   4   5   6   25.17    4.06
  -4   5  -6   29.46    4.74
  -5  -5  -6   49.28    5.25
  -5  -5  -6   66.87    7.00
  -5  -5  -6   68.43    7.34
  -5   5  -6   60.72    6.75
  -5   5  -6   65.20    6.72
  -6  -5  -6    9.98    4.39
  -6  -5  -6    7.31    3.27
  -6  -5  -6    7.85    4.60
  -6   5  -6    9.20    4.29
  -6   5  -6   17.00    4.67
  -6   5  -6   11.68    3.87
  -7  -5  -6  119.30    9.78
  -7  -5  -6  113.49    9.31
  -7  -5  -6  105.81    8.69
  -7   5  -6  125.40    9.99
  -7   5  -6  128.18    9.57
  -7   5  -6  118.96    8.92
  -8  -5  -6   12.05    5.18
  -8  -5  -6    8.30    4.44
  -8  -5  -6   11.06    5.36
  -8   5  -6    3.22    4.82
  -8   5  -6    6.49    4.73
  -8   5  -6    7.15    4.53
  -9  -5  -6    9.89    5.38
  -9  -5  -6    5.98    4.94
  -9  -5  -6   11.52    5.50
  -9   5  -6   13.12    5.01
  -9   5  -6    2.23    5.03
  -9   5  -6   14.12    5.39
 -10  -5  -6    6.97    5.50
 -10  -5  -6    0.68    5.40
 -10  -5  -6    7.87    5.04
 -10   5  -6   -1.41    5.58
 -10   5  -6    0.79    5.31
 -10   5  -6    1.64    4.85
 -10   5  -6   -1.63    7.44
 -11  -5  -6    8.77    7.45
 -11  -5  -6   16.67    6.81
 -11   5  -6    6.17    6.32
 -11   5  -6    3.46    8.37
 -11   5  -6    8.12    6.87
 -11  -6   6    5.70    5.45
 -11   6   6    5.34    4.60
 -11   6   6   13.32    9.39
 -11   6   6    4.68    4.88
 -10  -6   6   24.37    6.01
 -10   6   6   26.73    5.24
 -10   6   6   26.87    5.88
 -10   6   6   24.27    9.56
  -9  -6   6   11.14    4.27
  -9  -6   6    5.43    4.71
  -9   6   6   12.54    4.87
  -9   6   6   12.58    7.76
  -9   6   6   10.66    4.40
  -8  -6   6   29.45    5.44
  -8  -6   6   24.39    4.86
  -8   6   6   29.58    8.13
  -8   6   6   29.42    5.37
  -8   6   6   30.78    5.00
  -8   6   6   30.62    5.23
  -7  -6   6  119.94    8.50
  -7  -6   6  136.78    8.82
  -7   6   6  130.53   12.69
  -7   6   6  123.55    8.20
  -7   6   6  130.47    8.82
  -7   6   6  130.49    8.81
  -6  -6   6   53.39    5.76
  -6  -6   6   56.91    6.13
  -6   6   6   56.32    5.81
  -6   6   6   43.21    5.83
  -6   6   6   41.69    7.86
  -6   6   6   55.35    5.88
  -5  -6   6    1.10    2.95
  -5  -6   6    5.45    3.55
  -5   6   6    0.49    3.10
  -5   6   6    2.51    3.60
  -5   6   6   -6.13    4.58
  -5   6   6    2.07    3.28
   4  -6  -6   30.14    3.66
  -4  -6   6   16.79    4.16
  -4  -6   6   16.50    3.76
  -4   6   6   25.13    5.88
  -4   6   6   27.93    4.43
   4   6  -6   16.96    3.40
  -4   6   6   36.85    5.00
  -4   6   6   25.11    4.79
   3  -6  -6  255.36   10.83
  -3  -6   6  247.32   11.38
  -3  -6   6  251.06   11.51
   3   6  -6  257.42   10.92
  -3   6   6  252.23   11.63
  -3   6   6  251.77   11.64
  -3   6   6  243.07   11.35
  -2  -6   6  141.23    8.13
  -2  -6   6  134.15    7.77
   2  -6  -6  117.59    7.40
  -2   6   6  106.73    7.73
  -2   6   6  123.78    8.12
  -2   6   6  100.08    7.25
   2   6  -6  128.91    7.75
  -1  -6   6   36.98    4.88
   1  -6  -6   33.41    4.74
  -1  -6   6   24.71    4.15
   1   6  -6   39.57    4.91
  -1   6   6   33.98    4.75
  -1   6   6   50.05    6.90
  -1   6   6   40.25    5.28
   0  -6  -6   38.32    5.02
   0  -6   6   49.78    5.69
   0   6  -6   45.45    5.39
   0   6   6   37.91    5.06
   1  -6   6  331.55   13.92
  -1  -6  -6  317.50   13.96
   1   6   6  348.87   14.03
  -1   6  -6  332.88   13.94
  -2  -6  -6  500.11   19.05
   2  -6   6  506.66   18.54
  -2  -6  -6  479.65   18.85
  -2   6  -6  560.08   20.46
   2   6   6  495.41   18.57
  -2   6  -6  488.86   18.80
  -3  -6  -6   -0.84    2.45
  -3  -6  -6   -1.50    2.94
   3  -6   6    3.29    3.25
  -3  -6  -6    0.48    2.51
   3   6   6    6.87    3.33
  -3   6  -6   -3.08    2.82
  -3   6  -6    0.61    2.84
  -4  -6  -6  170.72    9.95
  -4  -6  -6  166.96    9.68
  -4  -6  -6  154.95    9.08
   4  -6   6  167.89    8.89
   4   6   6  159.69    8.88
  -4   6  -6  164.56    9.72
  -5  -6  -6  234.23   11.85
  -5  -6  -6  227.32   11.50
  -5  -6  -6  229.81   12.03
  -5   6  -6  236.13   11.82
  -5   6  -6  212.85   11.58
  -6  -6  -6  166.43    9.95
  -6  -6  -6  163.70   10.52
  -6  -6  -6  169.64   10.70
  -6   6  -6  159.69   10.35
  -6   6  -6  174.56   10.65
  -7  -6  -6   -0.39    4.37
  -7  -6  -6   -5.34    3.96
  -7  -6  -6   -2.13    3.18
  -7   6  -6    0.87    4.28
  -7   6  -6    3.86    4.35
  -8  -6  -6  267.33   13.80
  -8  -6  -6  245.06   14.07
  -8  -6  -6  259.46   14.48
  -8   6  -6  250.32   13.83
  -8   6  -6  260.36   14.10
  -8   6  -6  264.40   13.69
  -9  -6  -6   71.37    8.34
  -9  -6  -6   79.01    9.12
  -9  -6  -6   89.15    9.80
  -9   6  -6   80.54    8.89
  -9   6  -6   72.48    8.51
  -9   6  -6   86.39    9.10
 -10  -6  -6   12.96    6.75
 -10  -6  -6    8.26    5.44
 -10  -6  -6    5.29    5.63
 -10   6  -6   11.89    5.69
 -10   6  -6   -1.45    6.07
 -10   6  -6   11.67    6.22
 -10   6  -6    3.32    7.80
 -11  -6  -6    1.55    6.10
 -11   6  -6    4.05    5.95
 -11   6  -6    6.08    8.51
 -11   6  -6   -3.27    6.86
 -11  -7   6    6.12    6.21
 -11   7   6   -2.05    4.50
 -11   7   6   -0.65    5.48
 -11   7   6   12.59    9.69
 -10  -7   6   -0.11    5.30
 -10   7   6    3.66    5.15
 -10   7   6  -14.81    7.14
 -10   7   6    4.93    4.76
  -9  -7   6    3.36    4.26
  -9  -7   6    8.31    5.19
  -9   7   6    8.28    7.72
  -9   7   6   13.24    5.35
  -9   7   6    9.78    4.46
  -9   7   6    9.46    4.71
  -8  -7   6  131.87   10.05
  -8  -7   6  123.43    9.40
  -8   7   6  117.49   13.31
  -8   7   6  139.99    9.58
  -8   7   6  134.73    9.79
  -8   7   6  124.00    8.84
  -7  -7   6   19.50    4.83
  -7  -7   6   31.53    5.41
  -7   7   6   33.08    5.22
  -7   7   6   33.87    5.86
  -7   7   6   26.56    5.40
  -7   7   6   39.66    8.76
  -6  -7   6   13.28    4.41
  -6  -7   6   10.11    4.11
  -6   7   6    6.69    3.81
  -6   7   6   14.68    4.46
  -6   7   6   15.71    4.50
  -6   7   6    5.46    5.84
  -5  -7   6   91.70    7.68
  -5  -7   6   84.48    7.29
  -5   7   6   80.81    7.12
  -5   7   6   89.67    9.38
  -5   7   6   85.40    7.19
  -5   7   6   81.83    7.34
  -4  -7   6  644.30   22.82
  -4  -7   6  622.02   22.85
  -4   7   6  627.61   22.55
  -4   7   6  650.83   23.07
  -4   7   6  631.44   24.70
   4   7  -6  612.02   21.29
  -4   7   6  637.77   22.89
  -3  -7   6    9.80    3.25
   3  -7  -6   22.71    3.89
  -3  -7   6   13.18    4.05
  -3   7   6   14.14    4.25
  -3   7   6   17.71    4.35
  -3   7   6   13.75    3.72
   3   7  -6   17.31    3.97
  -2  -7   6  165.92    9.41
  -2  -7   6  169.39    9.10
   2  -7  -6  160.45    8.90
   2   7  -6  168.19    9.06
  -2   7   6  151.36    9.33
  -2   7   6  159.48    9.37
  -2   7   6  158.24    9.04
  -1  -7   6  120.26    8.33
   1  -7  -6  122.99    8.17
  -1  -7   6  129.23    8.37
   1   7  -6  143.24    8.53
  -1   7   6  131.11    8.61
   0  -7  -6   38.77    5.41
   0  -7   6   44.11    5.41
   0   7  -6   38.50    5.19
   0   7   6   41.67    5.41
   1  -7   6    1.78    3.05
  -1  -7  -6   -4.30    3.00
   1   7   6    1.43    3.17
  -1   7  -6    3.63    3.31
  -2  -7  -6   80.59    6.28
   2  -7   6   93.12    7.53
   2   7   6   88.04    7.36
  -2   7  -6   97.79    8.23
  -2   7  -6   79.95    7.18
  -3  -7  -6    9.03    3.29
   3  -7   6   10.47    3.68
  -3  -7  -6   15.86    4.05
  -3   7  -6   12.69    4.04
   3   7   6    9.84    3.75
  -3   7  -6   15.03    4.35
   4  -7   6    0.22    3.01
  -4  -7  -6    3.88    3.17
  -4  -7  -6   -0.63    2.72
  -4   7  -6    1.30    3.48
   4   7   6    2.45    3.04
  -4   7  -6    2.15    3.77
  -5  -7  -6    4.56    2.80
  -5  -7  -6   -2.62    3.84
  -5   7  -6   11.18    4.09
  -5   7  -6   10.03    4.30
  -6  -7  -6   60.21    8.01
  -6  -7  -6   61.40    7.02
  -6  -7  -6   71.22    7.79
  -6   7  -6   59.70    7.02
  -6   7  -6   68.13    7.53
  -7  -7  -6  395.07   17.71
  -7  -7  -6  374.42   17.19
  -7  -7  -6  400.78   17.84
  -7   7  -6  389.82   17.64
  -7   7  -6  368.19   17.21
  -8  -7  -6    8.70    4.49
  -8  -7  -6   -2.55    4.76
  -8  -7  -6   -3.69    4.64
  -8   7  -6   -0.40    4.66
  -8   7  -6    1.05    5.00
  -9  -7  -6    8.13    5.05
  -9  -7  -6    2.84    5.54
  -9   7  -6    2.75    5.12
  -9   7  -6   -3.79    5.25
  -9   7  -6    5.51    4.71
 -10  -7  -6   47.97    8.14
 -10  -7  -6   79.85    9.26
 -10   7  -6   66.69    8.88
 -10   7  -6   82.31   12.53
 -10   7  -6   75.59    8.98
 -10   7  -6   66.59    9.20
 -11  -8   6   30.22    7.50
 -11   8   6   22.89    6.23
 -11   8   6   20.57    6.64
 -11   8   6   29.89   10.91
 -10  -8   6   10.81    6.03
 -10   8   6   11.94    5.29
 -10   8   6    7.36    8.47
 -10   8   6   11.35    6.21
  -9  -8   6    5.42    4.47
  -9  -8   6   13.80    5.57
  -9   8   6   14.65    5.06
  -9   8   6    7.43    7.81
  -9   8   6    9.56    5.67
  -9   8   6    9.94    5.57
  -8  -8   6   18.13    5.46
  -8  -8   6   19.15    5.02
  -8   8   6   29.27    5.92
  -8   8   6   22.12    5.56
  -8   8   6   11.18    7.27
  -8   8   6   20.46    5.31
  -7  -8   6   33.16    5.88
  -7  -8   6   26.90    5.63
  -7   8   6   45.47    6.72
  -7   8   6   31.97    5.58
  -7   8   6   46.22    6.33
  -7   8   6   38.34    8.70
  -6  -8   6   16.10    4.59
  -6  -8   6   18.27    5.10
  -6   8   6   30.94    5.53
  -6   8   6   21.20    6.77
  -6   8   6   16.50    5.43
  -6   8   6   13.34    4.28
  -5  -8   6    6.77    3.68
  -5  -8   6    8.40    4.28
  -5   8   6   10.59    6.00
  -5   8   6   10.60    4.44
  -5   8   6    6.18    3.65
  -5   8   6   10.87    4.51
  -4  -8   6   45.59    6.05
  -4  -8   6   49.45    6.15
  -4   8   6   47.93    6.17
  -4   8   6   38.43    5.95
  -4   8   6   43.29    7.05
  -4   8   6   37.76    5.66
   4   8  -6   42.15    5.12
   3  -8  -6    8.09    3.39
  -3  -8   6   23.61    4.64
  -3  -8   6   15.81    3.63
   3   8  -6   15.07    3.95
  -3   8   6   13.54    4.16
  -3   8   6   15.33    4.05
  -3   8   6   12.33    4.35
  -2  -8   6    6.43    3.01
  -2  -8   6    1.93    3.39
   2  -8  -6    5.72    3.41
  -2   8   6    3.34    3.78
  -2   8   6    1.76    3.02
  -2   8   6    7.17    3.76
   2   8  -6    1.42    3.34
  -1  -8   6   25.96    4.23
   1  -8  -6   28.08    4.93
  -1  -8   6   28.94    4.83
  -1   8   6   25.32    4.43
   1   8  -6   26.71    4.90
  -1   8   6   25.29    5.16
   0  -8   6   -1.10    3.04
   0  -8  -6    3.21    3.52
   0   8   6   -4.28    3.29
   0   8  -6   -2.09    3.24
   1  -8   6    6.54    3.62
   1   8   6    7.66    3.77
  -1   8  -6   -1.08    3.36
  -2  -8  -6    4.89    2.40
   2  -8   6    4.30    3.29
  -2  -8  -6    4.93    3.50
  -2   8  -6    0.10    3.18
   2   8   6    2.16    3.44
  -2   8  -6   -1.96    2.62
  -3  -8  -6   13.14    4.12
   3  -8   6   11.22    4.00
  -3  -8  -6    6.85    2.97
  -3   8  -6    7.69    3.34
  -3   8  -6    5.67    3.47
   3   8   6    6.55    3.74
  -4  -8  -6    4.15    3.34
   4  -8   6    3.45    3.28
  -4  -8  -6    6.54    4.52
  -4  -8  -6    4.79    3.75
  -4   8  -6    1.50    3.54
   4   8   6    5.45    3.68
  -4   8  -6    3.83    3.59
  -5  -8  -6    5.09    4.08
  -5  -8  -6    4.12    3.32
  -5   8  -6   10.04    4.37
  -5   8  -6    3.80    3.81
  -6  -8  -6    3.87    3.64
  -6   8  -6    5.15    4.31
  -6   8  -6    4.20    4.44
  -7  -8  -6   45.13    7.54
  -7  -8  -6   32.59    5.42
  -7   8  -6   31.99    6.83
  -7   8  -6   47.63    6.95
  -8  -8  -6    0.37    4.48
  -8  -8  -6   -0.57    4.95
  -8   8  -6    2.03    5.09
  -8   8  -6   -2.79    5.12
  -9  -8  -6   38.51    6.81
  -9  -8  -6   33.32    7.70
  -9   8  -6   34.71    7.02
 -10  -8  -6    0.82    5.97
 -10  -8  -6   -4.24    5.08
 -10   8  -6   -7.28    5.19
 -10   8  -6   -3.05    5.42
 -10   8  -6   -9.32    7.57
 -10  -9   6    8.12    6.37
 -10   9   6    9.50    5.79
 -10   9   6   12.89    6.58
 -10   9   6   16.68    9.22
  -9  -9   6   28.28    6.05
  -9  -9   6   28.29    6.77
  -9   9   6   20.42    8.82
  -9   9   6   19.47    5.51
  -9   9   6   23.16    6.37
  -9   9   6   15.20    6.08
  -8  -9   6   38.99    6.68
  -8  -9   6   44.05    7.22
  -8   9   6   57.96    7.22
  -8   9   6   48.32    7.32
  -8   9   6   36.68    8.82
  -8   9   6   50.05    7.14
  -7  -9   6   12.98    4.92
  -7  -9   6   10.19    4.90
  -7   9   6   11.64    5.16
  -7   9   6    6.75    5.13
  -7   9   6   11.20    5.11
  -7   9   6   12.83    7.07
  -6  -9   6    5.47    4.10
  -6  -9   6   -8.81    3.77
  -6   9   6    5.26    4.75
  -6   9   6    1.57    5.92
  -6   9   6   -0.35    4.03
  -6   9   6    0.90    4.54
  -5  -9   6   75.97    8.02
  -5  -9   6   91.61    7.99
  -5   9   6   87.41    7.76
  -5   9   6   81.65    9.90
  -5   9   6   83.53    8.14
  -5   9   6   66.93    7.40
  -4  -9   6  187.83   10.55
  -4  -9   6  175.96   10.83
  -4   9   6  192.20   11.14
  -4   9   6  206.12   12.66
  -4   9   6  167.08   10.41
  -4   9   6  187.51   11.17
   3  -9  -6   70.88    6.60
  -3  -9   6   65.08    7.29
  -3  -9   6   61.31    6.36
   3   9  -6   86.03    7.08
  -3   9   6   68.92    6.96
  -3   9   6   80.79    7.76
  -3   9   6   70.87    7.09
  -2  -9   6  176.12   10.61
  -2  -9   6  195.89   10.57
   2  -9  -6  191.05   10.33
  -2   9   6  207.98   11.25
  -2   9   6  189.68   11.05
   2   9  -6  178.99   10.35
   1  -9  -6  471.32   18.70
  -1  -9   6  487.40   19.09
   1   9  -6  482.07   18.54
  -1   9   6  478.15   19.02
  -1   9   6  461.57   18.90
   0  -9   6  260.00   12.87
   0   9  -6  262.11   12.84
   0   9   6  263.91   13.03
   1  -9   6    4.56    3.71
  -1  -9  -6    7.79    3.77
  -1   9  -6   15.88    4.47
   1   9   6    2.26    3.90
  -2  -9  -6  133.70    9.30
   2  -9   6  123.50    8.84
  -2   9  -6  129.55    9.49
   2   9   6  139.10    9.26
  -3  -9  -6  289.17   13.65
  -3  -9  -6  287.97   14.12
   3  -9   6  304.07   13.61
  -3   9  -6  304.74   14.54
   3   9   6  283.57   13.64
  -4  -9  -6  115.15    9.25
   4  -9   6  130.28    8.64
  -4  -9  -6  109.89    8.21
  -4   9  -6  114.30    9.19
   4   9   6  113.35    8.73
  -5  -9  -6   -3.45    3.49
  -5  -9  -6    2.15    3.28
  -5   9  -6    2.50    4.22
  -6  -9  -6  108.00   10.02
  -6  -9  -6  129.55    9.57
  -6   9  -6  142.11   11.29
  -7  -9  -6   72.68    8.43
  -7   9  -6   76.03    8.75
  -8  -9  -6   32.87    6.49
  -8  -9  -6   35.88    7.71
  -8   9  -6   55.32    8.42
  -9  -9  -6    5.13    5.94
  -9  -9  -6    5.32    6.05
  -9   9  -6    4.50    6.42
 -10  -9  -6   74.05   10.37
 -10  -9  -6   96.08   10.40
 -10   9  -6   74.91    9.35
 -10   9  -6   97.98   10.37
 -10   9  -6   61.11   11.66
 -10 -10   6    1.21    5.15
 -10 -10   6    1.49    6.26
 -10  10   6   -2.77    6.15
 -10  10   6   -1.64    7.73
 -10  10   6    9.81    6.60
  -9 -10   6   15.94    6.75
  -9 -10   6   22.82    6.33
  -9  10   6   10.57    8.55
  -9  10   6   20.07    6.68
  -9  10   6   16.28    6.82
  -9  10   6   13.88    5.70
  -8 -10   6   -3.97    4.63
  -8 -10   6   -1.22    4.96
  -8  10   6    3.84    5.58
  -8  10   6   -6.69    6.62
  -8  10   6    2.89    5.10
  -8  10   6   -6.85    4.79
  -7 -10   6   41.03    6.73
  -7 -10   6   40.03    7.41
  -7  10   6   28.23    6.46
  -7  10   6   37.37    8.84
  -7  10   6   25.89    6.70
  -7  10   6   42.41    6.78
  -6 -10   6   54.72    7.68
  -6 -10   6   63.91    7.43
  -6  10   6   65.20    7.52
  -6  10   6   57.72    7.88
  -6  10   6   42.49    8.68
  -6  10   6   73.96    8.48
  -5 -10   6    1.53    3.73
  -5 -10   6    3.79    4.43
  -5  10   6    3.43    4.13
  -5  10   6   12.00    5.18
  -5  10   6   11.65    5.43
  -5  10   6   -0.19    5.79
  -4 -10   6   34.11    5.47
  -4 -10   6   31.56    5.92
  -4  10   6   50.85    7.97
  -4  10   6   39.98    5.97
  -4  10   6   43.48    6.46
  -4  10   6   33.84    6.18
  -3 -10   6   70.66    7.31
  -3 -10   6   79.51    7.44
   3 -10  -6   78.32    7.11
  -3  10   6   80.26    8.17
   3  10  -6   85.86    7.69
  -3  10   6   78.56    7.73
  -3  10   6   73.80    7.98
  -2 -10   6  201.42   11.45
   2 -10  -6  203.78   11.05
  -2 -10   6  168.27   10.39
  -2  10   6  199.78   11.50
   2  10  -6  181.18   10.66
  -2  10   6  189.01   10.83
   1 -10  -6   29.54    5.66
  -1 -10   6   24.79    5.11
   1  10  -6   29.38    5.11
  -1  10   6   22.25    5.18
   0 -10   6  143.20    9.80
   0 -10  -6  144.40    9.75
   0  10   6  145.99   10.13
   0  10  -6  133.96    9.80
  -1 -10  -6  145.66    9.93
   1 -10   6  141.19    9.74
  -1  10  -6  135.38    9.93
   1  10   6  137.29    9.86
  -2 -10  -6  330.62   15.13
   2 -10   6  290.02   14.29
   2  10   6  310.31   14.50
  -2  10  -6  295.03   14.63
   3 -10   6   -3.07    3.44
  -3 -10  -6    5.13    4.18
   3  10   6    5.39    4.27
  -3  10  -6   -2.51    4.08
   4 -10   6  122.01    9.15
  -4 -10  -6  134.71   10.24
   4  10   6  146.09    9.82
  -4  10  -6  133.58   10.46
  -5 -10  -6  138.23   10.76
  -5  10  -6  135.28   10.94
  -6 -10  -6   -1.04    4.05
  -6  10  -6   -3.87    4.85
  -7  10  -6    6.19    5.64
  -8  10  -6   13.42    6.58
  -9 -10  -6   78.72   10.27
  -9  10  -6   38.68    9.91
  -9  10  -6   62.90    9.30
 -10 -10  -6    6.29    6.86
 -10  10  -6    8.19    6.76
 -10  10  -6   17.18    8.91
 -10 -11   6   21.27    7.26
 -10 -11   6    0.56    5.75
 -10  11   6    6.56    6.97
 -10  11   6    6.39    6.66
 -10  11   6   -0.12    8.28
  -9 -11   6    7.29    5.82
  -9 -11   6    6.08    6.20
  -9  11   6    2.41    8.06
  -9  11   6   10.61    5.95
  -9  11   6    3.34    6.10
  -9  11   6   14.20    6.52
  -8 -11   6   -4.47    5.14
  -8 -11   6   -2.60    5.48
  -8  11   6    6.44    5.82
  -8  11   6   13.27    8.14
  -8  11   6    0.69    5.73
  -8  11   6   -5.10    5.16
  -7 -11   6    4.07    5.61
  -7 -11   6    5.29    4.79
  -7  11   6    2.51    5.83
  -7  11   6    2.82    5.55
  -7  11   6    3.38    6.99
  -7  11   6    1.26    4.95
  -6 -11   6    0.83    4.33
  -6 -11   6    7.07    5.18
  -6  11   6    5.86    6.64
  -6  11   6    4.49    4.37
  -6  11   6    2.05    5.42
  -6  11   6    6.84    5.47
  -5 -11   6    1.14    4.37
  -5 -11   6   -0.04    3.74
  -5  11   6   -3.63    4.49
  -5  11   6   -5.99    3.68
  -5  11   6    3.78    6.10
  -4 -11   6    4.26    3.84
  -4 -11   6    7.70    4.45
  -4  11   6    3.20    5.26
  -4  11   6    0.06    4.48
  -4  11   6    1.18    3.62
   3 -11  -6    5.86    4.02
  -3 -11   6    3.03    3.97
  -3  11   6   -0.02    4.45
  -3  11   6    8.56    4.02
   3  11  -6    2.33    4.02
  -3  11   6    1.44    4.91
   2 -11  -6    5.39    4.20
  -2 -11   6   -0.17    3.62
  -2  11   6    0.05    4.20
   2  11  -6    0.62    3.82
  -1 -11   6    4.59    4.02
   1  11  -6    6.65    4.44
  -1  11   6    7.42    4.81
   0 -11   6    6.00    4.10
   0 -11  -6   -3.37    3.61
   0  11   6    1.19    4.32
   0  11  -6   -2.05    3.81
   1 -11   6    6.69    4.28
  -1 -11  -6   15.67    5.02
   1  11   6   10.51    4.74
  -1  11  -6   14.74    4.87
   2 -11   6   40.90    6.19
  -2 -11  -6   27.77    5.58
   2  11   6   40.99    6.29
  -2  11  -6   41.67    6.55
  -3 -11  -6    1.76    4.20
   3 -11   6    8.81    4.43
  -3  11  -6    0.40    4.28
   3  11   6    3.75    4.02
  -4 -11  -6   29.05    6.39
  -4  11  -6   28.37    6.29
   4  11   6   39.98    6.24
  -5 -11  -6   -2.35    4.18
  -5  11  -6    4.15    5.01
  -6 -11  -6    6.33    4.75
  -6  11  -6    2.18    5.36
  -7 -11  -6    0.10    4.71
  -7  11  -6    5.23    5.70
  -8  11  -6    3.16    6.19
  -9 -11  -6   -3.50    6.26
  -9  11  -6    2.70    6.30
  -9  11  -6   -4.37    7.07
 -10 -11  -6   29.82    8.70
 -10  11  -6    4.65    8.26
 -10  11  -6   25.15    7.79
 -10 -12   6   31.94    7.78
 -10 -12   6   32.87    8.18
 -10  12   6   35.47   11.46
 -10  12   6   30.77    8.49
  -9 -12   6   24.31    7.83
  -9 -12   6   16.13    6.98
  -9  12   6   15.54    6.83
  -9  12   6    7.80    8.40
  -9  12   6   13.89    7.04
  -8 -12   6   -5.31    5.46
  -8 -12   6    1.45    5.46
  -8  12   6   -4.53    5.55
  -8  12   6   -3.65    5.98
  -8  12   6   11.33    8.06
  -7 -12   6   27.60    7.20
  -7 -12   6   40.46    7.23
  -7  12   6   32.18    7.36
  -7  12   6   26.30    9.08
  -7  12   6   50.51    8.34
  -6 -12   6  171.71   12.34
  -6 -12   6  172.99   12.93
  -6  12   6  146.96   14.38
  -6  12   6  178.30   12.80
  -6  12   6  155.72   11.78
  -5 -12   6    5.96    5.01
  -5  12   6   -1.22    5.40
  -5  12   6    7.72    4.53
  -5  12   6   -1.91    5.95
  -4 -12   6   25.21    6.07
  -4  12   6   48.26    8.36
  -4  12   6   25.39    6.20
  -4  12   6   35.16    6.58
   3 -12  -6  274.92   13.95
  -3 -12   6  275.07   14.94
   3  12  -6  277.75   14.19
  -3  12   6  305.12   15.40
  -2 -12   6  172.70   11.89
   2 -12  -6  192.07   12.04
   2  12  -6  182.24   11.43
  -2  12   6  167.65   11.83
   1 -12  -6    5.49    4.38
  -1 -12   6    3.17    4.16
  -1  12   6    6.03    4.93
   1  12  -6    3.47    4.39
   0 -12  -6  142.36   10.68
   0 -12   6  153.05   10.86
   0  12   6  154.58   11.29
   0  12  -6  150.22   10.74
   1 -12   6  606.98   23.15
  -1 -12  -6  590.42   23.48
  -1  12  -6  557.10   22.87
   1  12   6  555.25   22.83
  -2 -12  -6   22.79    5.61
   2 -12   6   26.24    5.61
  -2  12  -6   23.81    5.80
   2  12   6   26.65    6.09
  -3 -12  -6   17.65    5.09
   3 -12   6   22.51    5.64
   3  12   6   27.17    5.92
  -3  12  -6   18.51    5.51
  -4 -12  -6  123.00   11.27
   4  12   6  118.61   10.28
  -4  12  -6  103.02   10.00
  -5 -12  -6   38.70    6.96
  -5  12  -6   47.39    7.86
  -6 -12  -6   -4.70    4.27
  -6  12  -6   -0.28    5.24
  -7 -12  -6   -8.61    4.09
  -7  12  -6    5.57    6.04
  -8  12  -6    3.37    6.32
  -9 -12  -6   24.97    8.41
  -9  12  -6    5.00    7.59
  -9  12  -6   27.23    7.90
  -9 -13   6   56.19    9.47
  -9  13   6   71.01    9.94
  -9  13   6   69.74    9.29
  -9  13   6   73.39   12.98
  -8 -13   6    0.32    6.47
  -8  13   6   15.39    6.70
  -8  13   6    2.09    7.87
  -8  13   6    8.63    7.00
  -7 -13   6    2.11    6.33
  -7  13   6   17.95    6.82
  -7  13   6   -1.41    7.30
  -7  13   6    4.13    5.50
  -6 -13   6   95.33   10.33
  -6  13   6   69.81    9.34
  -6  13   6   68.55   10.64
  -5 -13   6  216.57   13.93
  -5  13   6  187.64   14.60
  -5  13   6  211.17   13.86
  -4 -13   6  171.76   12.72
  -4  13   6  175.20   12.66
  -4  13   6  176.82   13.74
  -3 -13   6   42.41    7.65
   3  13  -6   45.43    6.80
  -3  13   6   58.14    8.26
  -2 -13   6   51.81    7.77
   2  13  -6   50.42    7.30
  -2  13   6   26.84    6.76
  -1 -13   6   49.50    7.52
   1 -13  -6   57.76    7.58
   1  13  -6   67.21    7.87
  -1  13   6   49.28    7.67
   0 -13  -6   -1.37    4.19
   0 -13   6   -1.78    4.07
   0  13   6    2.58    5.13
   0  13  -6    6.27    4.83
  -1 -13  -6   47.86    7.89
   1 -13   6   44.52    6.90
  -1  13  -6   37.47    6.76
   1  13   6   41.45    7.26
   2 -13   6   40.26    7.01
  -2 -13  -6   34.93    7.16
  -2  13  -6   32.60    6.82
   2  13   6   46.79    7.28
   3 -13   6   63.09    7.91
  -3 -13  -6   72.01    9.26
   3  13   6   69.19    8.66
  -3  13  -6   73.03    8.77
  -4 -13  -6    4.06    4.46
  -4  13  -6   -1.80    4.52
  -5 -13  -6    9.72    5.46
  -5  13  -6    7.88    5.43
  -6 -13  -6   22.35    6.60
  -6  13  -6   14.53    6.08
  -7 -13  -6   53.21    8.23
  -7  13  -6   53.89    9.14
  -8 -13  -6   10.20    6.40
  -8  13  -6   11.02    7.68
  -8  13  -6   13.86    7.31
  -9  13  -6   -4.43    6.44
  -9  13  -6   -0.45    7.31
  -9 -14   6   11.58    7.48
  -9  14   6    8.53    9.38
  -9  14   6    6.79    7.57
  -8 -14   6   22.69    8.09
  -8  14   6   21.97    8.45
[truncated: 307,849 more chars]
