# Supplementary material
Source: MDPI journal article supplement (https://www.mdpi.com/2624-8549/1/1/9)
Supplement: s1 [file s1 › 1dCHCl3_final CCDC 1935233.cif]

 
data_CAN_1dCHCl3
 
_audit_creation_method            'SHELXL-2017/1'
_chemical_name_systematic
;
 ?
;
_chemical_name_common             ?
_chemical_melting_point           ?
_chemical_formula_moiety          ?
_chemical_formula_sum
 'C25 H16.83 Cl3 Co N2 O4' 
_chemical_formula_weight          574.52

loop_
 _atom_type_symbol
 _atom_type_description
 _atom_type_scat_dispersion_real
 _atom_type_scat_dispersion_imag
 _atom_type_scat_source
 'C'  'C'   0.0033   0.0016
 'International Tables Vol C Tables 4.2.6.8 and 6.1.1.4'
 'H'  'H'   0.0000   0.0000
 'International Tables Vol C Tables 4.2.6.8 and 6.1.1.4'
 'N'  'N'   0.0061   0.0033
 'International Tables Vol C Tables 4.2.6.8 and 6.1.1.4'
 'O'  'O'   0.0106   0.0060
 'International Tables Vol C Tables 4.2.6.8 and 6.1.1.4'
 'Cl'  'Cl'   0.1484   0.1585
 'International Tables Vol C Tables 4.2.6.8 and 6.1.1.4'
 'Co'  'Co'   0.3494   0.9721
 'International Tables Vol C Tables 4.2.6.8 and 6.1.1.4'
 
_space_group_crystal_system       monoclinic
_space_group_IT_number            14
_space_group_name_H-M_alt         'P 21/c'
_space_group_name_Hall            '-P 2ybc'
 
_shelx_space_group_comment
;
The symmetry employed for this shelxl refinement is uniquely defined
by the following loop, which should always be used as a source of
symmetry information in preference to the above space-group names.
They are only intended as comments.
;
 
loop_
 _space_group_symop_operation_xyz
 'x, y, z'
 '-x, y+1/2, -z+1/2'
 '-x, -y, -z'
 'x, -y-1/2, z-1/2'
 
_cell_length_a                    10.0048(16)
_cell_length_b                    16.371(3)
_cell_length_c                    15.036(3)
_cell_angle_alpha                 90
_cell_angle_beta                  97.402(3)
_cell_angle_gamma                 90
_cell_volume                      2442.3(7)
_cell_formula_units_Z             4
_cell_measurement_temperature     173(2)
_cell_measurement_reflns_used     42591
_cell_measurement_theta_min       1.847
_cell_measurement_theta_max       28.310
 
_exptl_crystal_description        block 
_exptl_crystal_colour             red
_exptl_crystal_density_meas       none
_exptl_crystal_density_method     'not measured'           
_exptl_crystal_density_diffrn     1.562          
_exptl_crystal_F_000              1163
_exptl_transmission_factor_min    0.707                                             
_exptl_transmission_factor_max    0.888                                         
_exptl_crystal_size_max           0.33
_exptl_crystal_size_mid           0.21
_exptl_crystal_size_min           0.11
_exptl_absorpt_coefficient_mu     1.066
_shelx_estimated_absorpt_T_min    ? 
_shelx_estimated_absorpt_T_max    ? 
_exptl_absorpt_correction_type    multi-scan 
_exptl_absorpt_correction_T_min   ? 
_exptl_absorpt_correction_T_max   ? 
_exptl_absorpt_process_details    'SADABS; Sheldrick, 1996' 
 
_exptl_special_details
;
 ?
;
 
_diffrn_ambient_temperature       173(2)
_diffrn_radiation_wavelength      0.71073
_diffrn_radiation_type            MoK\a
_diffrn_source                    'fine-focus sealed tube'
_diffrn_measurement_device_type   'Bruker Kappa Duo Apex II diffractometer'
_diffrn_measurement_method        '1.2\% \f scans and \w scans'
_diffrn_detector_area_resol_mean  ? 
_diffrn_reflns_number             42591
_diffrn_reflns_av_unetI/netI      0.0441
_diffrn_reflns_av_R_equivalents   0.0589
_diffrn_reflns_limit_h_min        -13
_diffrn_reflns_limit_h_max        7
_diffrn_reflns_limit_k_min        -21
_diffrn_reflns_limit_k_max        21
_diffrn_reflns_limit_l_min        -19
_diffrn_reflns_limit_l_max        20
_diffrn_reflns_theta_min          1.847
_diffrn_reflns_theta_max          28.310
_diffrn_reflns_theta_full         25.242
_diffrn_measured_fraction_theta_max   0.996
_diffrn_measured_fraction_theta_full  1.000
_diffrn_reflns_Laue_measured_fraction_max    0.996
_diffrn_reflns_Laue_measured_fraction_full   1.000
_diffrn_reflns_point_group_measured_fraction_max   0.996
_diffrn_reflns_point_group_measured_fraction_full  1.000
_reflns_number_total              6062
_reflns_number_gt                 4504
_reflns_threshold_expression      'I > 2\s(I)'
_reflns_Friedel_coverage          0.000
_reflns_Friedel_fraction_max      .
_reflns_Friedel_fraction_full     .
 
_reflns_special_details
;
 Reflections were merged by SHELXL according to the crystal
 class for the calculation of statistics and refinement.
 
 _reflns_Friedel_fraction is defined as the number of unique
 Friedel pairs measured divided by the number that would be
 possible theoretically, ignoring centric projections and
 systematic absences.
;
 
_computing_data_collection        'APEX2 (Bruker, 2005)'
_computing_cell_refinement        'SAINT-Plus (Bruker, 2004)'
_computing_data_reduction         'SAINT-Plus and XPREP (Bruker 2004)'
_computing_structure_solution     'SHELXT 2014/5 (Sheldrick, 2014)'
_computing_structure_refinement   'SHELXL-2017/1 (Sheldrick, 2017)'
_computing_molecular_graphics     'X-seed (Barbour, 1999)'
_computing_publication_material   'SHELXL-97 (Sheldrick, 1997)'
 
_refine_special_details
;
 ?
;
_refine_ls_structure_factor_coef  Fsqd
_refine_ls_matrix_type            full
_refine_ls_weighting_scheme       calc
_refine_ls_weighting_details
'w=1/[\s^2^(Fo^2^)+(0.0591P)^2^+3.3302P] where P=(Fo^2^+2Fc^2^)/3'
_atom_sites_solution_primary      ?
_atom_sites_solution_secondary    ?
_atom_sites_solution_hydrogens    geom
_refine_ls_hydrogen_treatment     constr
_refine_ls_extinction_method      none
_refine_ls_extinction_coef        .
_refine_ls_number_reflns          6062
_refine_ls_number_parameters      326
_refine_ls_number_restraints      0
_refine_ls_R_factor_all           0.0741
_refine_ls_R_factor_gt            0.0479
_refine_ls_wR_factor_ref          0.1293
_refine_ls_wR_factor_gt           0.1155
_refine_ls_goodness_of_fit_ref    1.019
_refine_ls_restrained_S_all       1.019
_refine_ls_shift/su_max           0.000
_refine_ls_shift/su_mean          0.000
 
loop_
 _atom_site_label
 _atom_site_type_symbol
 _atom_site_fract_x
 _atom_site_fract_y
 _atom_site_fract_z
 _atom_site_U_iso_or_equiv
 _atom_site_adp_type
 _atom_site_occupancy
 _atom_site_site_symmetry_order  
 _atom_site_calc_flag
 _atom_site_refinement_flags_posn
 _atom_site_refinement_flags_adp
 _atom_site_refinement_flags_occupancy
 _atom_site_disorder_assembly
 _atom_site_disorder_group
Co1 Co 0.36123(3) 0.58277(2) 0.02980(2) 0.01400(11) Uani 1 1 d . . . . .
O1A O 0.53181(18) 0.95911(12) -0.39797(12) 0.0207(4) Uani 1 1 d . . . . .
N1A N 0.4821(2) 0.66171(14) -0.04188(14) 0.0188(5) Uani 1 1 d . . . . .
C1A C 0.6555(2) 0.97172(16) -0.37731(16) 0.0150(5) Uani 1 1 d . . . . .
O2A O 0.72169(18) 1.02377(11) -0.41536(12) 0.0184(4) Uani 1 1 d . . . . .
C2A C 0.7283(2) 0.92351(17) -0.30073(17) 0.0176(5) Uani 1 1 d . . . . .
C3A C 0.6576(3) 0.86763(16) -0.25490(17) 0.0177(5) Uani 1 1 d . . . . .
H3A H 0.5661 0.8595 -0.2729 0.021 Uiso 1 1 calc R U . . .
C4A C 0.7223(3) 0.82361(17) -0.18217(18) 0.0210(6) Uani 1 1 d . . . . .
C5A C 0.8607(3) 0.8352(2) -0.1571(2) 0.0279(7) Uani 1 1 d . . . . .
H5A H 0.9049 0.8062 -0.1088 0.034 Uiso 1 1 calc R U . . .
C6A C 0.9323(3) 0.8895(2) -0.2038(2) 0.0298(7) Uani 1 1 d . . . . .
H6A H 1.0244 0.8961 -0.1871 0.036 Uiso 1 1 calc R U . . .
C7A C 0.8670(3) 0.93410(18) -0.27528(19) 0.0234(6) Uani 1 1 d . . . . .
H7A H 0.9152 0.9708 -0.3061 0.028 Uiso 1 1 calc R U . . .
C8A C 0.6429(3) 0.76589(17) -0.13348(18) 0.0199(5) Uani 1 1 d . . . . .
C9A C 0.5481(3) 0.71371(18) -0.17937(18) 0.0231(6) Uani 1 1 d . . . . .
H9A H 0.5360 0.7128 -0.2417 0.028 Uiso 1 1 calc R U . . .
C10A C 0.4719(3) 0.66327(18) -0.13210(18) 0.0221(6) Uani 1 1 d . . . . .
H10A H 0.4102 0.6284 -0.1643 0.026 Uiso 1 1 calc R U . . .
C11A C 0.5744(3) 0.71162(18) 0.00241(18) 0.0250(6) Uani 1 1 d . . . . .
H11A H 0.5837 0.7119 0.0648 0.030 Uiso 1 1 calc R U . . .
C12A C 0.6560(3) 0.76249(19) -0.04003(19) 0.0269(6) Uani 1 1 d . . . . .
H12A H 0.7201 0.7947 -0.0062 0.032 Uiso 1 1 calc R U . . .
O1B O -0.34103(18) 0.17469(12) 0.36908(13) 0.0226(4) Uani 1 1 d . . . . .
N1B N 0.2558(2) 0.49871(14) 0.10610(15) 0.0190(5) Uani 1 1 d . . . . .
C1B C -0.2226(3) 0.19025(17) 0.40523(18) 0.0188(5) Uani 1 1 d . . . . .
O2B O -0.17785(19) 0.16078(13) 0.48070(13) 0.0263(5) Uani 1 1 d . . . . .
C2B C -0.1347(3) 0.24314(18) 0.35586(18) 0.0208(6) Uani 1 1 d . . . . .
C3B C -0.1865(3) 0.2755(2) 0.2733(2) 0.0292(7) Uani 1 1 d . . . . .
H3B H -0.2749 0.2637 0.2495 0.035 Uiso 1 1 calc R U . . .
C4B C -0.1089(3) 0.3249(2) 0.2257(2) 0.0296(7) Uani 1 1 d . . . . .
H4B H -0.1459 0.3464 0.1707 0.035 Uiso 1 1 calc R U . . .
C5B C 0.0245(3) 0.34288(18) 0.25916(18) 0.0217(6) Uani 1 1 d . . . . .
C6B C 0.0776(3) 0.3087(2) 0.3414(2) 0.0338(8) Uani 1 1 d . . . . .
H6B H 0.1667 0.3192 0.3644 0.041 Uiso 1 1 calc R U . . .
C7B C -0.0008(3) 0.2593(2) 0.3893(2) 0.0323(7) Uani 1 1 d . . . . .
H7B H 0.0362 0.2370 0.4439 0.039 Uiso 1 1 calc R U . . .
C8B C 0.1068(3) 0.39560(17) 0.20733(18) 0.0197(6) Uani 1 1 d . . . . .
C9B C 0.0788(3) 0.40069(18) 0.11403(18) 0.0223(6) Uani 1 1 d . . . . .
H9B H 0.0100 0.3694 0.0836 0.027 Uiso 1 1 calc R U . . .
C10B C 0.1535(3) 0.45215(18) 0.06718(18) 0.0226(6) Uani 1 1 d . . . . .
H10B H 0.1321 0.4549 0.0052 0.027 Uiso 1 1 calc R U . . .
C11B C 0.2127(3) 0.44400(19) 0.24804(19) 0.0259(6) Uani 1 1 d . . . . .
H11B H 0.2352 0.4431 0.3100 0.031 Uiso 1 1 calc R U . . .
C12B C 0.2839(3) 0.49321(19) 0.19606(18) 0.0244(6) Uani 1 1 d . . . . .
H12B H 0.3548 0.5241 0.2246 0.029 Uiso 1 1 calc R U . . .
Cl1C Cl 0.5567(3) 0.41839(15) 0.39771(15) 0.1451(9) Uani 1 1 d . . . . .
C1C C 0.7022(7) 0.4023(4) 0.4704(4) 0.096(2) Uani 1 1 d . . . . .
H2C H 0.7486 0.3550 0.4504 0.115 Uiso 0.42(2) 1 calc R U P A 2
H1C H 0.6783 0.3903 0.5295 0.115 Uiso 0.42(2) 1 calc R U P A 2
Cl2C Cl 0.8104(3) 0.4849(2) 0.47801(19) 0.1849(13) Uani 1 1 d . . . . .
Cl3C Cl 0.6610(8) 0.3839(5) 0.5828(4) 0.076(2) Uani 0.42(2) 1 d . . P A 1
Cl4C Cl 0.6854(12) 0.3667(7) 0.5679(8) 0.156(3) Uani 0.58(2) 1 d . . P A 1
 
loop_
 _atom_site_aniso_label
 _atom_site_aniso_U_11
 _atom_site_aniso_U_22
 _atom_site_aniso_U_33
 _atom_site_aniso_U_23
 _atom_site_aniso_U_13
 _atom_site_aniso_U_12
Co1 0.01434(17) 0.01584(19) 0.01188(16) -0.00096(14) 0.00186(11) 0.00023(13)
O1A 0.0181(9) 0.0222(11) 0.0208(9) 0.0019(8) -0.0011(7) -0.0016(7)
N1A 0.0205(11) 0.0193(12) 0.0165(10) 0.0031(9) 0.0015(8) 0.0003(9)
C1A 0.0187(12) 0.0149(13) 0.0120(11) -0.0027(10) 0.0038(9) 0.0006(9)
O2A 0.0196(9) 0.0204(10) 0.0156(9) 0.0051(7) 0.0037(7) -0.0005(7)
C2A 0.0187(12) 0.0192(14) 0.0147(11) 0.0032(10) 0.0009(9) -0.0005(10)
C3A 0.0161(12) 0.0199(14) 0.0170(12) 0.0019(10) 0.0015(9) -0.0024(10)
C4A 0.0219(13) 0.0223(15) 0.0185(13) 0.0057(11) 0.0015(10) -0.0034(11)
C5A 0.0211(14) 0.0341(18) 0.0268(14) 0.0139(13) -0.0038(11) -0.0028(12)
C6A 0.0142(12) 0.0391(18) 0.0341(16) 0.0135(14) -0.0039(11) -0.0038(11)
C7A 0.0199(13) 0.0268(16) 0.0228(14) 0.0093(11) 0.0001(11) -0.0056(11)
C8A 0.0184(12) 0.0208(15) 0.0200(13) 0.0063(11) 0.0007(10) -0.0001(10)
C9A 0.0307(14) 0.0246(15) 0.0134(12) 0.0022(11) 0.0004(10) -0.0043(11)
C10A 0.0268(14) 0.0230(15) 0.0159(12) 0.0027(11) 0.0009(10) -0.0042(11)
C11A 0.0293(14) 0.0292(16) 0.0155(12) 0.0026(12) -0.0003(11) -0.0064(12)
C12A 0.0267(14) 0.0312(17) 0.0210(14) 0.0024(12) -0.0032(11) -0.0097(12)
O1B 0.0191(9) 0.0261(11) 0.0225(10) 0.0074(8) 0.0022(7) -0.0035(8)
N1B 0.0166(10) 0.0231(12) 0.0173(10) 0.0020(9) 0.0022(8) -0.0021(9)
C1B 0.0184(12) 0.0187(14) 0.0195(13) 0.0019(11) 0.0036(10) -0.0010(10)
O2B 0.0252(10) 0.0345(12) 0.0184(9) 0.0094(9) -0.0007(8) -0.0079(8)
C2B 0.0194(13) 0.0217(15) 0.0213(13) 0.0043(11) 0.0029(10) -0.0041(10)
C3B 0.0167(13) 0.0417(19) 0.0274(15) 0.0167(14) -0.0038(11) -0.0066(12)
C4B 0.0211(14) 0.0423(19) 0.0237(14) 0.0166(13) -0.0031(11) -0.0061(12)
C5B 0.0190(13) 0.0250(15) 0.0209(13) 0.0052(11) 0.0017(10) -0.0034(11)
C6B 0.0240(14) 0.050(2) 0.0250(15) 0.0128(14) -0.0067(12) -0.0162(14)
C7B 0.0279(15) 0.048(2) 0.0193(14) 0.0136(14) -0.0049(11) -0.0123(14)
C8B 0.0163(12) 0.0223(15) 0.0205(13) 0.0050(11) 0.0024(10) -0.0020(10)
C9B 0.0197(13) 0.0277(16) 0.0189(13) 0.0007(11) 0.0005(10) -0.0063(11)
C10B 0.0211(13) 0.0303(16) 0.0166(12) 0.0026(11) 0.0026(10) -0.0062(11)
C11B 0.0258(14) 0.0355(17) 0.0156(12) 0.0025(12) -0.0007(11) -0.0086(12)
C12B 0.0247(14) 0.0308(17) 0.0172(13) 0.0009(12) 0.0011(11) -0.0096(12)
Cl1C 0.164(2) 0.149(2) 0.1050(15) -0.0095(13) -0.0485(14) 0.0302(15)
C1C 0.114(5) 0.093(5) 0.078(4) -0.018(4) 0.004(4) 0.023(4)
Cl2C 0.161(2) 0.225(3) 0.176(2) 0.064(2) 0.0509(19) -0.077(2)
Cl3C 0.079(3) 0.095(4) 0.058(3) -0.014(3) 0.020(3) -0.040(2)
Cl4C 0.174(6) 0.099(4) 0.165(6) 0.065(4) -0.086(4) -0.068(4)
 
_geom_special_details
;
 All esds (except the esd in the dihedral angle between two l.s. planes)
 are estimated using the full covariance matrix.  The cell esds are taken
 into account individually in the estimation of esds in distances, angles
 and torsion angles; correlations between esds in cell parameters are only
 used when they are defined by crystal symmetry.  An approximate (isotropic)
 treatment of cell esds is used for estimating esds involving l.s. planes.
;
 
loop_
 _geom_bond_atom_site_label_1
 _geom_bond_atom_site_label_2
 _geom_bond_distance
 _geom_bond_site_symmetry_2
 _geom_bond_publ_flag
Co1 O1A 2.0210(18) 4_576 ?
Co1 O2A 2.0529(18) 2_644 ?
Co1 N1A 2.152(2) . ?
Co1 N1B 2.153(2) . ?
Co1 O1B 2.1671(19) 2 ?
Co1 O2B 2.2243(19) 2 ?
Co1 C1B 2.514(3) 2 ?
O1A C1A 1.254(3) . ?
O1A Co1 2.0211(18) 4_575 ?
N1A C11A 1.343(4) . ?
N1A C10A 1.348(3) . ?
C1A O2A 1.261(3) . ?
C1A C2A 1.504(3) . ?
O2A Co1 2.0529(18) 2_654 ?
C2A C3A 1.392(4) . ?
C2A C7A 1.402(4) . ?
C3A C4A 1.397(4) . ?
C3A H3A 0.9300 . ?
C4A C5A 1.399(4) . ?
C4A C8A 1.487(4) . ?
C5A C6A 1.388(4) . ?
C5A H5A 0.9300 . ?
C6A C7A 1.391(4) . ?
C6A H6A 0.9300 . ?
C7A H7A 0.9300 . ?
C8A C9A 1.392(4) . ?
C8A C12A 1.395(4) . ?
C9A C10A 1.381(4) . ?
C9A H9A 0.9300 . ?
C10A H10A 0.9300 . ?
C11A C12A 1.379(4) . ?
C11A H11A 0.9300 . ?
C12A H12A 0.9300 . ?
O1B C1B 1.264(3) . ?
O1B Co1 2.1671(19) 2_545 ?
N1B C10B 1.348(3) . ?
N1B C12B 1.349(3) . ?
C1B O2B 1.261(3) . ?
C1B C2B 1.497(4) . ?
C1B Co1 2.514(3) 2_545 ?
O2B Co1 2.2242(19) 2_545 ?
C2B C3B 1.387(4) . ?
C2B C7B 1.395(4) . ?
C3B C4B 1.384(4) . ?
C3B H3B 0.9300 . ?
C4B C5B 1.396(4) . ?
C4B H4B 0.9300 . ?
C5B C6B 1.398(4) . ?
C5B C8B 1.482(4) . ?
C6B C7B 1.391(4) . ?
C6B H6B 0.9300 . ?
C7B H7B 0.9300 . ?
C8B C9B 1.397(4) . ?
C8B C11B 1.399(4) . ?
C9B C10B 1.378(4) . ?
C9B H9B 0.9300 . ?
C10B H10B 0.9300 . ?
C11B C12B 1.382(4) . ?
C11B H11B 0.9300 . ?
C12B H12B 0.9300 . ?
Cl1C C1C 1.724(7) . ?
C1C Cl4C 1.607(12) . ?
C1C Cl2C 1.726(7) . ?
C1C Cl3C 1.817(9) . ?
C1C H2C 0.9700 . ?
C1C H1C 0.9700 . ?
 
loop_
 _geom_angle_atom_site_label_1
 _geom_angle_atom_site_label_2
 _geom_angle_atom_site_label_3
 _geom_angle
 _geom_angle_site_symmetry_1
 _geom_angle_site_symmetry_3
 _geom_angle_publ_flag
O1A Co1 O2A 120.86(8) 4_576 2_644 ?
O1A Co1 N1A 89.01(8) 4_576 . ?
O2A Co1 N1A 93.17(8) 2_644 . ?
O1A Co1 N1B 86.26(8) 4_576 . ?
O2A Co1 N1B 88.45(8) 2_644 . ?
N1A Co1 N1B 175.17(8) . . ?
O1A Co1 O1B 90.41(7) 4_576 2 ?
O2A Co1 O1B 148.29(7) 2_644 2 ?
N1A Co1 O1B 92.50(8) . 2 ?
N1B Co1 O1B 88.48(8) . 2 ?
O1A Co1 O2B 149.84(7) 4_576 2 ?
O2A Co1 O2B 88.29(7) 2_644 2 ?
N1A Co1 O2B 97.55(8) . 2 ?
N1B Co1 O2B 87.04(8) . 2 ?
O1B Co1 O2B 60.03(7) 2 2 ?
O1A Co1 C1B 119.89(8) 4_576 2 ?
O2A Co1 C1B 118.13(8) 2_644 2 ?
N1A Co1 C1B 98.51(9) . 2 ?
N1B Co1 C1B 84.70(9) . 2 ?
O1B Co1 C1B 30.18(8) 2 2 ?
O2B Co1 C1B 30.08(8) 2 2 ?
C1A O1A Co1 158.02(18) . 4_575 ?
C11A N1A C10A 116.5(2) . . ?
C11A N1A Co1 120.78(18) . . ?
C10A N1A Co1 122.76(18) . . ?
O1A C1A O2A 123.9(2) . . ?
O1A C1A C2A 117.9(2) . . ?
O2A C1A C2A 118.1(2) . . ?
C1A O2A Co1 121.29(16) . 2_654 ?
C3A C2A C7A 119.6(2) . . ?
C3A C2A C1A 119.8(2) . . ?
C7A C2A C1A 120.6(2) . . ?
C2A C3A C4A 120.8(2) . . ?
C2A C3A H3A 119.6 . . ?
C4A C3A H3A 119.6 . . ?
C3A C4A C5A 118.9(2) . . ?
C3A C4A C8A 119.3(2) . . ?
C5A C4A C8A 121.7(2) . . ?
C6A C5A C4A 120.5(3) . . ?
C6A C5A H5A 119.8 . . ?
C4A C5A H5A 119.8 . . ?
C5A C6A C7A 120.4(3) . . ?
C5A C6A H6A 119.8 . . ?
C7A C6A H6A 119.8 . . ?
C6A C7A C2A 119.7(2) . . ?
C6A C7A H7A 120.2 . . ?
C2A C7A H7A 120.2 . . ?
C9A C8A C12A 116.4(2) . . ?
C9A C8A C4A 121.3(2) . . ?
C12A C8A C4A 122.3(2) . . ?
C10A C9A C8A 119.8(2) . . ?
C10A C9A H9A 120.1 . . ?
C8A C9A H9A 120.1 . . ?
N1A C10A C9A 123.7(3) . . ?
N1A C10A H10A 118.2 . . ?
C9A C10A H10A 118.2 . . ?
N1A C11A C12A 123.2(3) . . ?
N1A C11A H11A 118.4 . . ?
C12A C11A H11A 118.4 . . ?
C11A C12A C8A 120.4(3) . . ?
C11A C12A H12A 119.8 . . ?
C8A C12A H12A 119.8 . . ?
C1B O1B Co1 90.29(15) . 2_545 ?
C10B N1B C12B 116.5(2) . . ?
C10B N1B Co1 121.80(17) . . ?
C12B N1B Co1 121.60(18) . . ?
O2B C1B O1B 121.0(2) . . ?
O2B C1B C2B 120.3(2) . . ?
O1B C1B C2B 118.7(2) . . ?
O2B C1B Co1 62.13(14) . 2_545 ?
O1B C1B Co1 59.53(13) . 2_545 ?
C2B C1B Co1 170.3(2) . 2_545 ?
C1B O2B Co1 87.80(15) . 2_545 ?
C3B C2B C7B 118.7(2) . . ?
C3B C2B C1B 119.3(2) . . ?
C7B C2B C1B 121.9(2) . . ?
C4B C3B C2B 121.1(3) . . ?
C4B C3B H3B 119.4 . . ?
C2B C3B H3B 119.4 . . ?
C3B C4B C5B 120.7(3) . . ?
C3B C4B H4B 119.6 . . ?
C5B C4B H4B 119.6 . . ?
C4B C5B C6B 118.1(2) . . ?
C4B C5B C8B 120.2(2) . . ?
C6B C5B C8B 121.7(2) . . ?
C7B C6B C5B 121.0(3) . . ?
C7B C6B H6B 119.5 . . ?
C5B C6B H6B 119.5 . . ?
C6B C7B C2B 120.2(3) . . ?
C6B C7B H7B 119.9 . . ?
C2B C7B H7B 119.9 . . ?
C9B C8B C11B 116.6(2) . . ?
C9B C8B C5B 120.6(2) . . ?
C11B C8B C5B 122.7(2) . . ?
C10B C9B C8B 119.9(3) . . ?
C10B C9B H9B 120.1 . . ?
C8B C9B H9B 120.1 . . ?
N1B C10B C9B 123.7(2) . . ?
N1B C10B H10B 118.1 . . ?
C9B C10B H10B 118.1 . . ?
C12B C11B C8B 119.9(3) . . ?
C12B C11B H11B 120.0 . . ?
C8B C11B H11B 120.0 . . ?
N1B C12B C11B 123.4(3) . . ?
N1B C12B H12B 118.3 . . ?
C11B C12B H12B 118.3 . . ?
Cl4C C1C Cl1C 117.0(6) . . ?
Cl4C C1C Cl2C 111.2(5) . . ?
Cl1C C1C Cl2C 113.2(4) . . ?
Cl4C C1C Cl3C 13.4(7) . . ?
Cl1C C1C Cl3C 109.9(5) . . ?
Cl2C C1C Cl3C 106.5(4) . . ?
Cl1C C1C H2C 108.9 . . ?
Cl2C C1C H2C 108.9 . . ?
Cl1C C1C H1C 108.9 . . ?
Cl2C C1C H1C 108.9 . . ?
H2C C1C H1C 107.8 . . ?
 
loop_
 _geom_torsion_atom_site_label_1
 _geom_torsion_atom_site_label_2
 _geom_torsion_atom_site_label_3
 _geom_torsion_atom_site_label_4
 _geom_torsion
 _geom_torsion_site_symmetry_1
 _geom_torsion_site_symmetry_2
 _geom_torsion_site_symmetry_3
 _geom_torsion_site_symmetry_4
 _geom_torsion_publ_flag
Co1 O1A C1A O2A 75.9(6) 4_575 . . . ?
Co1 O1A C1A C2A -106.0(5) 4_575 . . . ?
O1A C1A O2A Co1 -9.4(3) . . . 2_654 ?
C2A C1A O2A Co1 172.46(16) . . . 2_654 ?
O1A C1A C2A C3A -0.6(4) . . . . ?
O2A C1A C2A C3A 177.7(2) . . . . ?
O1A C1A C2A C7A 179.1(2) . . . . ?
O2A C1A C2A C7A -2.6(4) . . . . ?
C7A C2A C3A C4A 1.9(4) . . . . ?
C1A C2A C3A C4A -178.4(2) . . . . ?
C2A C3A C4A C5A -1.4(4) . . . . ?
C2A C3A C4A C8A 178.6(2) . . . . ?
C3A C4A C5A C6A 0.0(5) . . . . ?
C8A C4A C5A C6A -180.0(3) . . . . ?
C4A C5A C6A C7A 1.0(5) . . . . ?
C5A C6A C7A C2A -0.5(5) . . . . ?
C3A C2A C7A C6A -0.9(4) . . . . ?
C1A C2A C7A C6A 179.4(3) . . . . ?
C3A C4A C8A C9A 43.1(4) . . . . ?
C5A C4A C8A C9A -136.9(3) . . . . ?
C3A C4A C8A C12A -135.0(3) . . . . ?
C5A C4A C8A C12A 45.0(4) . . . . ?
C12A C8A C9A C10A 0.9(4) . . . . ?
C4A C8A C9A C10A -177.3(3) . . . . ?
C11A N1A C10A C9A -1.4(4) . . . . ?
Co1 N1A C10A C9A 179.7(2) . . . . ?
C8A C9A C10A N1A 0.9(5) . . . . ?
C10A N1A C11A C12A 0.0(4) . . . . ?
Co1 N1A C11A C12A 179.0(2) . . . . ?
N1A C11A C12A C8A 1.8(5) . . . . ?
C9A C8A C12A C11A -2.2(4) . . . . ?
C4A C8A C12A C11A 176.0(3) . . . . ?
Co1 O1B C1B O2B -9.7(3) 2_545 . . . ?
Co1 O1B C1B C2B 169.0(2) 2_545 . . . ?
O1B C1B O2B Co1 9.4(3) . . . 2_545 ?
C2B C1B O2B Co1 -169.2(2) . . . 2_545 ?
O2B C1B C2B C3B -179.5(3) . . . . ?
O1B C1B C2B C3B 1.8(4) . . . . ?
O2B C1B C2B C7B 2.2(4) . . . . ?
O1B C1B C2B C7B -176.5(3) . . . . ?
C7B C2B C3B C4B -1.9(5) . . . . ?
C1B C2B C3B C4B 179.7(3) . . . . ?
C2B C3B C4B C5B 0.7(5) . . . . ?
C3B C4B C5B C6B 0.8(5) . . . . ?
C3B C4B C5B C8B 179.7(3) . . . . ?
C4B C5B C6B C7B -1.1(5) . . . . ?
C8B C5B C6B C7B -180.0(3) . . . . ?
C5B C6B C7B C2B -0.1(5) . . . . ?
C3B C2B C7B C6B 1.6(5) . . . . ?
C1B C2B C7B C6B 180.0(3) . . . . ?
C4B C5B C8B C9B -26.5(4) . . . . ?
C6B C5B C8B C9B 152.3(3) . . . . ?
C4B C5B C8B C11B 151.7(3) . . . . ?
C6B C5B C8B C11B -29.4(5) . . . . ?
C11B C8B C9B C10B -0.6(4) . . . . ?
C5B C8B C9B C10B 177.8(3) . . . . ?
C12B N1B C10B C9B -0.1(4) . . . . ?
Co1 N1B C10B C9B -176.6(2) . . . . ?
C8B C9B C10B N1B 0.8(5) . . . . ?
C9B C8B C11B C12B -0.3(4) . . . . ?
C5B C8B C11B C12B -178.6(3) . . . . ?
C10B N1B C12B C11B -0.9(4) . . . . ?
Co1 N1B C12B C11B 175.7(2) . . . . ?
C8B C11B C12B N1B 1.1(5) . . . . ?
 
loop_
 _geom_hbond_atom_site_label_D 
 _geom_hbond_atom_site_label_H 
 _geom_hbond_atom_site_label_A 
 _geom_hbond_distance_DH 
 _geom_hbond_distance_HA 
 _geom_hbond_distance_DA 
 _geom_hbond_angle_DHA 
 _geom_hbond_site_symmetry_A 
C9B H9B O2B  0.93 2.33 3.210(3) 158.0 4_565
C10B H10B O2A  0.93 2.40 2.980(3) 120.6 2_644
C10A H10A O2A  0.93 2.55 3.136(3) 121.1 2_644
 
_refine_diff_density_max    0.674
_refine_diff_density_min   -0.946
_refine_diff_density_rms    0.086

_shelxl_version_number 2014-3

_shelx_res_file
;
TITL C:1rof_a.res
CELL 0.71073 10.0048 16.3713 15.0362 90.000 97.402 90.000
ZERR 4.0000 0.0016 0.0027 0.0025 0.000 0.003 0.000
LATT 1
SYMM -X, 0.5+Y, 0.5-Z
SFAC C H N O CL CO
UNIT 100 67.33 8 16 12 4
BOND $H
CONF
EQIV $1 X,1/2-Y,Z-1/2
EQIV $2 1-X,1-Y,-Z
EQIV $3 1-X,Y-1/2,-Z-1/2
FREE Cl3C Cl4C
HTAB C9B O2B_$1
HTAB C10B O2A_$3
HTAB C10A O2A_$3
ACTA
FMAP 2 1 53
PLAN 20 0 0
HTAB 2.0
LIST 6 1
L.S. 10
WGHT    0.059100    3.330200
FVAR       0.25944   0.41619
CO1   6    0.361233    0.582773    0.029797    11.00000    0.01434    0.01584 =
         0.01188   -0.00096    0.00186    0.00023
O1A   4    0.531812    0.959111   -0.397972    11.00000    0.01810    0.02219 =
         0.02082    0.00185   -0.00111   -0.00163
N1A   3    0.482124    0.661711   -0.041879    11.00000    0.02049    0.01934 =
         0.01647    0.00314    0.00154    0.00031
C1A   1    0.655519    0.971724   -0.377306    11.00000    0.01867    0.01492 =
         0.01197   -0.00265    0.00385    0.00061
O2A   4    0.721693    1.023768   -0.415360    11.00000    0.01959    0.02041 =
         0.01560    0.00512    0.00374   -0.00051
C2A   1    0.728288    0.923512   -0.300729    11.00000    0.01867    0.01916 =
         0.01466    0.00320    0.00093   -0.00051
C3A   1    0.657603    0.867630   -0.254904    11.00000    0.01614    0.01992 =
         0.01701    0.00186    0.00146   -0.00241
AFIX  43
H3A   2    0.566127    0.859484   -0.272925    11.00000   -1.20000
AFIX   0
C4A   1    0.722349    0.823615   -0.182165    11.00000    0.02193    0.02228 =
         0.01847    0.00573    0.00150   -0.00344
C5A   1    0.860656    0.835155   -0.157066    11.00000    0.02107    0.03409 =
         0.02685    0.01394   -0.00382   -0.00276
AFIX  43
H5A   2    0.904905    0.806224   -0.108768    11.00000   -1.20000
AFIX   0
C6A   1    0.932257    0.889478   -0.203751    11.00000    0.01422    0.03909 =
         0.03411    0.01351   -0.00390   -0.00384
AFIX  43
H6A   2    1.024410    0.896088   -0.187111    11.00000   -1.20000
AFIX   0
C7A   1    0.867039    0.934098   -0.275277    11.00000    0.01993    0.02684 =
         0.02278    0.00934    0.00006   -0.00564
AFIX  43
H7A   2    0.915228    0.970777   -0.306071    11.00000   -1.20000
AFIX   0
C8A   1    0.642864    0.765885   -0.133477    11.00000    0.01843    0.02076 =
         0.01996    0.00632    0.00073   -0.00014
C9A   1    0.548060    0.713708   -0.179374    11.00000    0.03072    0.02460 =
         0.01337    0.00219    0.00038   -0.00428
AFIX  43
H9A   2    0.536010    0.712816   -0.241737    11.00000   -1.20000
AFIX   0
C10A  1    0.471936    0.663270   -0.132104    11.00000    0.02676    0.02302 =
         0.01594    0.00274    0.00088   -0.00421
AFIX  43
H10A  2    0.410179    0.628425   -0.164336    11.00000   -1.20000
AFIX   0
C11A  1    0.574397    0.711620    0.002409    11.00000    0.02930    0.02924 =
         0.01554    0.00262   -0.00029   -0.00639
AFIX  43
H11A  2    0.583714    0.711865    0.064751    11.00000   -1.20000
AFIX   0
C12A  1    0.655962    0.762495   -0.040033    11.00000    0.02667    0.03121 =
         0.02104    0.00245   -0.00323   -0.00967
AFIX  43
H12A  2    0.720073    0.794735   -0.006186    11.00000   -1.20000
AFIX   0
O1B   4   -0.341029    0.174688    0.369077    11.00000    0.01907    0.02609 =
         0.02249    0.00742    0.00219   -0.00350
N1B   3    0.255761    0.498714    0.106098    11.00000    0.01657    0.02314 =
         0.01730    0.00203    0.00216   -0.00206
C1B   1   -0.222645    0.190248    0.405232    11.00000    0.01844    0.01874 =
         0.01946    0.00190    0.00358   -0.00104
O2B   4   -0.177851    0.160776    0.480696    11.00000    0.02519    0.03450 =
         0.01844    0.00944   -0.00067   -0.00794
C2B   1   -0.134746    0.243135    0.355858    11.00000    0.01936    0.02170 =
         0.02133    0.00429    0.00289   -0.00411
C3B   1   -0.186480    0.275472    0.273286    11.00000    0.01668    0.04166 =
         0.02741    0.01668   -0.00375   -0.00663
AFIX  43
H3B   2   -0.274856    0.263729    0.249537    11.00000   -1.20000
AFIX   0
C4B   1   -0.108851    0.324895    0.225655    11.00000    0.02114    0.04228 =
         0.02374    0.01664   -0.00315   -0.00609
AFIX  43
H4B   2   -0.145948    0.346364    0.170707    11.00000   -1.20000
AFIX   0
C5B   1    0.024520    0.342885    0.259162    11.00000    0.01898    0.02497 =
         0.02087    0.00521    0.00168   -0.00335
C6B   1    0.077583    0.308699    0.341391    11.00000    0.02402    0.04979 =
         0.02498    0.01277   -0.00669   -0.01623
AFIX  43
H6B   2    0.166721    0.319160    0.364407    11.00000   -1.20000
AFIX   0
C7B   1   -0.000819    0.259296    0.389321    11.00000    0.02787    0.04752 =
         0.01935    0.01358   -0.00486   -0.01229
AFIX  43
H7B   2    0.036187    0.236968    0.443858    11.00000   -1.20000
AFIX   0
C8B   1    0.106849    0.395600    0.207327    11.00000    0.01629    0.02228 =
         0.02053    0.00504    0.00242   -0.00197
C9B   1    0.078849    0.400694    0.114026    11.00000    0.01971    0.02770 =
         0.01892    0.00067    0.00052   -0.00633
AFIX  43
H9B   2    0.009979    0.369422    0.083604    11.00000   -1.20000
AFIX   0
C10B  1    0.153485    0.452146    0.067177    11.00000    0.02108    0.03027 =
         0.01657    0.00257    0.00264   -0.00620
AFIX  43
H10B  2    0.132072    0.454892    0.005201    11.00000   -1.20000
AFIX   0
C11B  1    0.212749    0.444000    0.248042    11.00000    0.02580    0.03549 =
         0.01561    0.00250   -0.00068   -0.00862
AFIX  43
H11B  2    0.235235    0.443051    0.310006    11.00000   -1.20000
AFIX   0
C12B  1    0.283879    0.493210    0.196061    11.00000    0.02467    0.03085 =
         0.01725    0.00090    0.00111   -0.00963
AFIX  43
H12B  2    0.354787    0.524123    0.224581    11.00000   -1.20000
AFIX   0
CL1C  5    0.556718    0.418390    0.397711    11.00000    0.16400    0.14896 =
         0.10503   -0.00949   -0.04854    0.03021
C1C   1    0.702174    0.402318    0.470354    11.00000    0.11378    0.09266 =
         0.07810   -0.01810    0.00430    0.02328
AFIX  23
PART 2
H2C   2    0.748565    0.355016    0.450410    21.00000   -1.20000
H1C   2    0.678317    0.390258    0.529477    21.00000   -1.20000
AFIX   0
PART 0
CL2C  5    0.810424    0.484867    0.478013    11.00000    0.16110    0.22547 =
         0.17567    0.06423    0.05087   -0.07737
PART 1
CL3C  5    0.660980    0.383908    0.582837    21.00000    0.07881    0.09469 =
         0.05778   -0.01444    0.02033   -0.03959
CL4C  5    0.685371    0.366718    0.567879   -21.00000    0.17441    0.09881 =
         0.16515    0.06520   -0.08569   -0.06834
HKLF 4

REM  C:1rof_a.res
REM R1 =  0.0479 for    4504 Fo > 4sig(Fo)  and  0.0741 for all    6062 data
REM    326 parameters refined using      0 restraints

END

WGHT      0.0591      3.3302

REM Instructions for potential hydrogen bonds
HTAB C10A O2A_$3
HTAB C9B O2B_$1
HTAB C10B O2A_$3

REM Highest difference peak  0.674,  deepest hole -0.946,  1-sigma level  0.086
Q1    1   0.8046  0.5015  0.4925  11.00000  0.05    0.67
Q2    1   0.5233  0.4146  0.4032  11.00000  0.05    0.66
Q3    1   0.6298  0.4636  0.3806  11.00000  0.05    0.64
Q4    1   0.6081  0.4793  0.4063  11.00000  0.05    0.54
Q5    1   0.8371  0.4286  0.4829  11.00000  0.05    0.51
Q6    1   0.8031  0.4644  0.4208  11.00000  0.05    0.46
Q7    1   0.7959  0.9215 -0.2992  11.00000  0.05    0.41
Q8    1   0.5694  0.4631  0.4469  11.00000  0.05    0.41
Q9    1   0.0774  0.3666  0.2353  11.00000  0.05    0.39
Q10   1  -0.1655  0.2062  0.3748  11.00000  0.05    0.37
Q11   1   0.6827  0.7941 -0.1606  11.00000  0.05    0.36
Q12   1   0.6878  0.9446 -0.3389  11.00000  0.05    0.35
Q13   1   0.8844  0.9055 -0.2366  11.00000  0.05    0.34
Q14   1   0.8942  0.8473 -0.2004  11.00000  0.05    0.34
Q15   1   0.0156  0.3562  0.3593  11.00000  0.05    0.32
Q16   1   0.0407  0.2793  0.3554  11.00000  0.05    0.32
Q17   1   0.1415  0.4314  0.2347  11.00000  0.05    0.32
Q18   1   0.7835  0.8322 -0.1584  11.00000  0.05    0.31
Q19   1   0.6963  0.8948 -0.2799  11.00000  0.05    0.31
Q20   1   0.7926  0.8176 -0.1736  11.00000  0.05    0.31
;
_shelx_res_checksum   83507

_shelx_hkl_file
;
  -1   0   0  784.67   13.59
  -1   0   0  787.91   13.61
  -1   0   0  765.29   13.39
  -2   0   0  756.88   14.21
  -2   0   0  750.56   13.64
  -2   0   0  759.31   13.94
  -2   0   0  741.11   13.67
  -3   0   0  137.07    3.91
  -3   0   0  141.20    3.91
  -3   0   0  144.22    4.82
  -3   0   0  139.43    5.14
  -3   0   0  143.19    3.62
  -4   0   0  427.13    8.73
  -4   0   0  427.27    8.49
  -4   0   0  412.50   10.67
  -4   0   0  429.60   10.23
  -4   0   0  416.30    9.15
  -4   0   0  420.41    9.10
  -5   0   0  110.81    5.28
  -5   0   0  109.00    4.18
  -5   0   0  119.71    5.77
  -5   0   0  112.44    4.10
  -5   0   0  117.00    3.83
  -5   0   0  116.74    3.82
  -5   0   0  116.59    4.00
  -6   0   0  416.84    9.43
  -6   0   0  412.85    9.60
  -6   0   0  399.57    9.34
  -6   0   0  417.62    9.76
  -6   0   0  423.06   11.45
  -6   0   0  393.12   11.97
  -7   0   0  188.20    6.22
  -7   0   0  197.79    7.97
  -7   0   0  185.65    6.09
  -7   0   0  190.18    6.08
  -7   0   0  175.83    5.94
  -7   0   0  177.84    6.20
  -7   0   0  192.21    8.48
  -8   0   0   90.34    4.81
  -8   0   0   98.75    4.93
  -8   0   0   91.94    4.81
  -8   0   0  105.56    7.08
  -9   0   0   22.80    4.74
  -9   0   0   10.70    2.66
  -9   0   0   20.48    3.17
  -9   0   0   17.96    3.15
 -10   0   0  178.10    7.58
 -10   0   0  165.01    9.94
 -10   0   0  185.18    7.59
 -10   0   0  178.55    7.55
 -11   0   0  242.07    9.51
 -11   0   0  246.64   12.70
 -11   0   0  238.43    9.63
 -12   0   0    4.44    3.21
 -12   0   0   18.68    5.72
 -12   0   0    7.10    3.51
 -13   0   0   36.74    7.96
 -13   0   0   37.05    5.54
 -13   0   0   44.79    5.73
   0  -1   0   -0.76    0.30
   0   1   0   -0.28    0.37
   0   1   0   -0.32    0.29
  -1  -1   0  226.13    5.15
  -1  -1   0  242.88    5.02
  -1  -1   0  232.71    4.78
   1  -1   0  254.20    4.85
  -1  -1   0  238.89    4.80
  -1   1   0  231.69    4.78
   1   1   0  240.51    4.75
  -1   1   0  235.51    4.90
  -1   1   0  240.49    5.26
  -2  -1   0  149.72    3.50
  -2  -1   0  145.53    3.79
  -2  -1   0  143.91    4.22
  -2  -1   0  135.32    3.42
  -2  -1   0  142.89    4.48
  -2  -1   0  144.01    3.53
  -2  -1   0  147.90    3.84
  -2   1   0  147.28    4.61
  -2   1   0  142.01    3.49
  -2   1   0  140.77    3.22
  -2   1   0  142.72    3.68
  -2   1   0  144.86    3.27
  -2   1   0  138.72    3.77
  -2   1   0  145.09    3.70
  -3  -1   0  143.41    3.85
  -3  -1   0  143.71    5.21
  -3  -1   0  153.02    4.30
  -3  -1   0  147.46    3.99
  -3  -1   0  153.88    4.30
  -3  -1   0  156.20    5.12
  -3  -1   0  154.39    3.87
  -3   1   0  148.39    4.15
  -3   1   0  155.03    5.56
  -3   1   0  151.50    3.90
  -3   1   0  147.75    4.58
  -3   1   0  151.17    4.22
  -4  -1   0  142.22    5.61
  -4  -1   0  128.59    4.31
  -4  -1   0  132.20    5.40
  -4  -1   0  130.38    4.25
  -4  -1   0  137.31    4.11
  -4  -1   0  135.52    3.91
  -4  -1   0  133.32    3.91
  -4   1   0  136.52    4.25
  -4   1   0  140.83    4.04
  -4   1   0  130.67    4.22
  -4   1   0  128.93    3.71
  -4   1   0  130.28    5.72
  -4   1   0  130.22    4.88
  -5  -1   0  320.31    7.88
  -5  -1   0  325.22    7.52
  -5  -1   0  325.24    7.67
  -5  -1   0  341.02    9.72
  -5  -1   0  302.30    7.91
  -5  -1   0  310.08    7.43
  -5  -1   0  334.92    9.56
  -5   1   0  317.77    9.85
  -5   1   0  314.78    8.70
  -5   1   0  314.35    7.88
  -5   1   0  302.45    7.20
  -5   1   0  318.27    7.83
  -5   1   0  323.02    7.33
  -5   1   0  317.89    7.52
  -6  -1   0   31.75    3.00
  -6  -1   0   42.06    4.48
  -6  -1   0   40.17    2.93
  -6  -1   0   37.19    2.82
  -6  -1   0   33.88    4.20
  -6  -1   0   36.82    3.01
  -6  -1   0   34.16    2.76
  -6   1   0   42.29    2.90
  -6   1   0   39.26    3.92
  -6   1   0   43.31    4.65
  -6   1   0   41.42    3.10
  -6   1   0   38.96    2.77
  -6   1   0   38.60    2.82
  -7  -1   0   27.00    2.94
  -7  -1   0   23.82    4.02
  -7  -1   0   24.10    2.79
  -7  -1   0   22.74    2.76
  -7  -1   0   18.97    2.70
  -7  -1   0   21.12    2.60
  -7   1   0   25.74    2.67
  -7   1   0   24.92    2.66
  -7   1   0   20.27    2.46
  -7   1   0   26.18    2.93
  -7   1   0   17.77    3.31
  -7   1   0   24.27    4.33
  -8  -1   0   40.93    3.90
  -8  -1   0   37.84    3.67
  -8  -1   0   35.26    5.15
  -8  -1   0   39.80    3.53
  -8   1   0   37.22    3.45
  -8   1   0   39.32    3.71
  -8   1   0   54.81    6.17
  -8   1   0   36.30    3.57
  -9  -1   0   18.37    3.11
  -9  -1   0   15.36    2.91
  -9  -1   0   26.68    4.82
  -9  -1   0   21.97    3.34
  -9   1   0   18.08    2.96
  -9   1   0   22.65    4.89
  -9   1   0   21.35    3.31
  -9   1   0   15.34    3.04
 -10  -1   0    9.76    3.81
 -10  -1   0    8.12    2.91
 -10  -1   0   11.52    2.90
 -10  -1   0    7.12    2.65
 -10   1   0   15.70    4.75
 -10   1   0   12.51    2.97
 -10   1   0    7.27    2.76
 -11  -1   0   18.89    5.28
 -11  -1   0   15.64    3.60
 -11  -1   0   12.74    3.41
 -11   1   0   12.09    3.43
 -11   1   0   11.18    3.45
 -11   1   0   12.68    5.10
 -12  -1   0    0.28    4.33
 -12  -1   0    2.03    3.04
 -12  -1   0   -0.12    2.97
 -12   1   0    5.63    3.27
 -12   1   0    2.26    4.44
 -12   1   0   -3.58    2.67
 -13  -1   0   -2.09    4.27
 -13  -1   0   -4.32    2.91
 -13  -1   0   -1.65    3.36
 -13   1   0   -1.03    3.09
 -13   1   0   -2.19    2.90
 -13   1   0   -3.69    4.59
   0   2   0  296.24    5.86
   0   2   0  299.87    6.38
   1  -2   0  169.74    4.09
  -1  -2   0  165.84    3.80
  -1  -2   0  168.49    4.41
  -1  -2   0  162.41    4.20
  -1   2   0  164.31    4.29
  -1   2   0  163.60    4.43
   1   2   0  167.97    4.27
  -1   2   0  164.99    4.32
   2  -2   0  833.03   15.33
  -2  -2   0  867.63   15.63
  -2  -2   0  830.90   15.85
  -2  -2   0  854.65   15.92
  -2  -2   0  852.04   16.35
  -2  -2   0  835.36   16.49
  -2  -2   0  871.57   16.39
  -2  -2   0  875.33   15.92
  -2   2   0  878.43   16.64
  -2   2   0  880.20   15.70
  -2   2   0  859.70   16.17
   2   2   0  881.62   15.74
  -2   2   0  864.71   15.84
  -2   2   0  854.19   15.69
  -2   2   0  849.39   14.89
  -2   2   0  837.75   16.16
  -3  -2   0    7.83    2.28
  -3  -2   0    3.90    1.42
  -3  -2   0    6.28    1.35
  -3  -2   0    7.68    1.79
  -3  -2   0    7.83    1.46
  -3  -2   0    8.00    1.40
  -3  -2   0    8.42    1.58
  -3   2   0    7.38    2.17
  -3   2   0    6.85    1.50
  -3   2   0    6.50    1.43
  -3   2   0    4.42    1.17
  -3   2   0    9.97    1.55
  -3   2   0    6.87    1.19
  -3   2   0    8.23    1.59
  -4  -2   0   10.59    1.79
  -4  -2   0   10.98    2.31
  -4  -2   0   10.92    2.47
  -4  -2   0    9.02    1.71
  -4  -2   0    5.92    1.43
  -4  -2   0    9.58    1.64
  -4  -2   0    8.11    1.72
  -4   2   0    9.32    1.44
  -4   2   0   10.56    1.80
  -4   2   0   10.37    1.73
  -4   2   0    6.58    1.35
  -4   2   0    7.00    1.78
  -4   2   0    6.67    2.41
  -5  -2   0   11.45    1.82
  -5  -2   0   16.53    2.89
  -5  -2   0   12.04    2.00
  -5  -2   0   10.15    1.76
  -5  -2   0   12.06    1.86
  -5  -2   0   15.26    2.16
  -5  -2   0   10.77    2.67
  -5   2   0    9.57    2.07
  -5   2   0   14.70    2.03
  -5   2   0   10.66    1.91
  -5   2   0   10.99    1.66
  -5   2   0    8.19    2.66
  -5   2   0   11.69    1.87
  -6  -2   0   21.85    2.72
  -6  -2   0   25.25    2.76
  -6  -2   0   25.03    2.68
  -6  -2   0   24.69    3.62
  -6  -2   0   25.93    2.70
  -6  -2   0   24.70    2.66
  -6   2   0   24.61    2.70
  -6   2   0   19.09    2.47
  -6   2   0   24.76    2.46
  -6   2   0   27.57    4.31
  -6   2   0   21.79    2.36
  -6   2   0   24.52    2.62
  -6   2   0   37.59    3.78
  -7  -2   0    6.99    1.92
  -7  -2   0   10.56    2.13
  -7  -2   0   11.49    2.50
  -7  -2   0   12.26    2.30
  -7  -2   0    8.74    2.05
  -7  -2   0    6.55    2.75
  -7   2   0   13.73    3.90
  -7   2   0   11.00    2.55
  -7   2   0   10.19    1.97
  -7   2   0   10.96    2.15
  -7   2   0   16.66    2.56
  -8  -2   0   32.84    3.66
  -8  -2   0   37.69    3.77
  -8  -2   0   34.87    3.62
  -8  -2   0   42.40    3.88
  -8  -2   0   35.64    4.98
  -8  -2   0   43.75    4.07
  -8   2   0   33.12    3.49
  -8   2   0   37.62    3.71
  -8   2   0   38.55    3.57
  -8   2   0   32.24    5.38
  -9  -2   0   55.66    4.97
  -9  -2   0   52.00    4.55
  -9  -2   0   60.92    6.81
  -9  -2   0   44.16    4.36
  -9  -2   0   39.67    4.13
  -9  -2   0   36.46    4.00
  -9   2   0   54.09    4.53
  -9   2   0   56.87    4.92
  -9   2   0   55.18    7.20
  -9   2   0   42.48    4.18
 -10  -2   0   21.32    3.63
 -10  -2   0   21.28    3.64
 -10  -2   0   23.13    4.79
 -10  -2   0   17.30    3.47
 -10   2   0   24.62    3.69
 -10   2   0   25.51    5.87
 -10   2   0   16.03    3.24
 -10   2   0   21.03    3.55
 -11  -2   0   12.02    3.42
 -11  -2   0   19.20    3.80
 -11  -2   0   13.35    4.81
 -11  -2   0   24.05    4.32
 -11   2   0   19.65    3.82
 -11   2   0   24.05    4.20
 -11   2   0    4.99    4.29
 -12  -2   0    8.83    3.64
 -12  -2   0   14.59    3.92
 -12  -2   0    5.44    4.31
 -12   2   0   11.15    4.95
 -12   2   0   16.28    3.88
 -12   2   0   11.46    3.79
 -13  -2   0   -3.32    3.58
 -13  -2   0    2.85    3.45
 -13   2   0    0.01    3.40
 -13   2   0    2.14    3.22
 -13   2   0    6.88    5.37
   0  -3   0   -0.17    1.00
   0  -3   0    1.29    1.15
   0   3   0   -0.06    0.95
   0   3   0   -0.94    1.17
   0   3   0    0.26    1.25
  -1  -3   0  243.86    6.11
  -1  -3   0  244.87    6.35
   1  -3   0  240.97    5.93
  -1   3   0  235.63    6.12
  -1   3   0  246.02    6.30
   1   3   0  232.75    6.16
  -1   3   0  240.42    6.15
  -2  -3   0 5111.83   82.21
  -2  -3   0 5046.79   85.47
  -2  -3   0 5020.40   86.96
  -2  -3   0 5101.52   85.44
   2  -3   0 5031.35   84.62
  -2  -3   0 4914.25   85.09
  -2   3   0 4918.95   85.03
  -2   3   0 5017.81   86.66
  -2   3   0 4901.61   86.69
   2   3   0 5083.19   84.99
  -2   3   0 5013.27   85.13
  -2   3   0 5060.75   83.59
  -2   3   0 5025.38   85.24
  -3  -3   0  210.21    6.23
  -3  -3   0  218.23    6.31
  -3  -3   0  213.79    6.00
  -3  -3   0  209.55    5.95
   3  -3   0  217.66    5.22
  -3  -3   0  218.93    6.04
  -3  -3   0  213.39    6.01
  -3   3   0  216.28    6.11
  -3   3   0  215.73    6.15
  -3   3   0  215.63    5.76
   3   3   0  216.54    5.60
  -3   3   0  214.81    5.99
  -3   3   0  220.97    7.11
  -3   3   0  224.52    5.78
  -3   3   0  221.40    5.24
  -4  -3   0   24.54    2.45
  -4  -3   0   23.99    2.34
  -4  -3   0   26.43    2.84
  -4  -3   0   27.58    2.63
  -4  -3   0   31.13    3.19
  -4  -3   0   22.86    2.51
  -4   3   0   23.08    2.21
  -4   3   0   25.10    2.49
  -4   3   0   20.79    2.39
  -4   3   0   18.70    2.09
  -4   3   0   28.04    3.65
  -4   3   0   24.67    2.53
  -4   3   0   28.09    2.48
  -5  -3   0  233.29    6.77
  -5  -3   0  209.25    6.88
  -5  -3   0  221.83    6.82
  -5  -3   0  227.75    6.68
  -5  -3   0  225.10    6.63
  -5  -3   0  222.22    7.48
  -5   3   0  215.77    6.28
  -5   3   0  224.02    6.53
  -5   3   0  230.56    6.70
  -5   3   0  228.35    6.56
  -5   3   0  228.80    8.63
  -5   3   0  226.53    6.71
  -5   3   0  225.71    6.26
  -6  -3   0  225.76    6.95
  -6  -3   0  222.96    7.26
  -6  -3   0  234.03    7.10
  -6  -3   0  210.32    6.91
  -6  -3   0  218.82    7.09
  -6  -3   0  218.86    7.99
  -6   3   0  208.49    6.54
  -6   3   0  229.30    6.64
  -6   3   0  220.58    7.03
  -6   3   0  211.01    9.05
  -6   3   0  213.87    6.87
  -6   3   0  231.36    6.91
  -6   3   0  224.10    6.90
  -7  -3   0    7.65    2.14
  -7  -3   0    5.61    2.13
  -7  -3   0    7.55    2.26
  -7  -3   0    6.47    2.76
  -7  -3   0    5.31    1.99
  -7  -3   0    7.37    2.08
  -7   3   0    8.16    2.10
  -7   3   0    6.50    2.08
  -7   3   0    8.95    2.04
  -7   3   0    3.28    2.90
  -7   3   0    7.15    2.09
  -7   3   0    7.11    1.92
  -7   3   0    4.73    2.38
  -8  -3   0   43.43    4.09
  -8  -3   0   52.86    4.65
  -8  -3   0   44.99    4.19
  -8  -3   0   47.14    4.47
  -8  -3   0   47.69    4.31
  -8  -3   0   62.41    6.13
  -8   3   0   45.94    4.31
  -8   3   0   43.78    3.96
  -8   3   0   50.08    4.07
  -8   3   0   54.11    4.24
  -8   3   0   54.01    5.01
  -8   3   0   50.33    6.46
  -8   3   0   41.03    3.90
  -9  -3   0   93.73    5.84
  -9  -3   0   93.17    5.53
  -9  -3   0   90.77    5.73
  -9  -3   0   97.51    7.00
  -9  -3   0   99.73    6.00
  -9  -3   0   96.85    5.75
  -9   3   0   96.84    5.69
  -9   3   0   92.98    8.73
  -9   3   0  101.46    5.56
  -9   3   0   93.41    5.53
 -10  -3   0   35.77    4.36
 -10  -3   0   39.18    4.40
 -10  -3   0   38.14    4.87
 -10  -3   0   35.10    5.59
 -10  -3   0   35.63    4.49
 -10   3   0   44.54    4.86
 -10   3   0   28.73    3.97
 -10   3   0   31.53    6.62
 -10   3   0   39.10    4.32
 -11  -3   0    6.80    3.19
 -11  -3   0    7.21    3.33
 -11  -3   0   11.35    4.57
 -11  -3   0   14.53    3.64
 -11   3   0    3.66    3.01
 -11   3   0    3.78    4.77
 -11   3   0   14.83    3.59
 -12  -3   0   77.23    7.31
 -12  -3   0   66.92    6.47
 -12   3   0   66.83    6.54
 -12   3   0   77.42    9.93
 -12   3   0   71.51    6.54
 -13  -3   0   38.40    5.64
 -13  -3   0   32.19    5.53
 -13   3   0   21.33    4.93
 -13   3   0   22.24    4.75
 -13   3   0   28.35    7.61
   0  -4   0   60.12    3.40
   0  -4   0   58.09    3.28
   0   4   0   55.28    3.49
   0   4   0   56.48    2.90
   0   4   0   56.76    3.57
  -1  -4   0   29.99    2.77
  -1  -4   0   31.72    2.64
   1  -4   0   35.77    2.72
  -1   4   0   39.91    3.37
  -1   4   0   39.45    3.12
  -1   4   0   31.72    2.88
   1   4   0   36.70    3.01
  -2  -4   0  304.60    7.93
  -2  -4   0  306.57    7.02
  -2  -4   0  314.35    8.23
  -2  -4   0  302.15    7.87
   2  -4   0  313.13    7.52
  -2  -4   0  288.56    7.76
  -2   4   0  302.19    7.75
  -2   4   0  317.21    7.99
  -2   4   0  306.72    7.82
  -2   4   0  299.87    8.25
   2   4   0  306.52    7.86
  -2   4   0  306.79    8.07
  -3  -4   0  210.81    6.10
  -3  -4   0  228.02    6.71
  -3  -4   0  219.26    6.56
  -3  -4   0  221.39    6.88
  -3  -4   0  228.04    6.95
  -3  -4   0  229.47    6.70
   3  -4   0  226.09    5.91
  -3   4   0  229.32    6.72
   3   4   0  225.74    6.34
  -3   4   0  226.35    6.62
  -3   4   0  218.36    7.48
  -3   4   0  227.64    6.49
  -3   4   0  220.47    6.34
  -3   4   0  224.92    6.66
  -4  -4   0  314.83    8.67
  -4  -4   0  324.59    8.44
  -4  -4   0  314.10    8.44
  -4  -4   0  297.91    8.35
  -4  -4   0  308.25    8.36
  -4  -4   0  324.90    8.89
  -4   4   0  320.81    8.50
  -4   4   0  301.88    9.67
  -4   4   0  318.55    8.53
  -4   4   0  324.30    8.45
  -4   4   0  318.10    8.16
   4   4   0  320.27    7.67
  -4   4   0  307.91    8.12
  -5  -4   0   69.26    4.22
  -5  -4   0   74.74    4.11
  -5  -4   0   78.05    4.46
  -5  -4   0   77.82    4.23
  -5  -4   0   74.06    4.11
  -5  -4   0   70.30    4.04
  -5   4   0   78.12    3.51
  -5   4   0   79.13    4.23
  -5   4   0   74.50    4.03
  -5   4   0   74.78    5.53
  -5   4   0   71.98    3.88
  -5   4   0   70.46    3.90
  -5   4   0   74.78    4.18
  -6  -4   0   26.61    3.02
  -6  -4   0   29.98    3.27
  -6  -4   0   29.49    3.54
  -6  -4   0   34.99    3.54
  -6  -4   0   31.08    3.45
  -6  -4   0   26.59    3.53
  -6   4   0   31.26    3.35
  -6   4   0   24.85    2.80
  -6   4   0   29.07    3.10
  -6   4   0   29.50    3.05
  -6   4   0   28.89    3.16
  -6   4   0   28.49    4.66
  -6   4   0   28.08    3.02
  -7  -4   0  146.34    6.56
  -7  -4   0  161.27    7.23
  -7  -4   0  151.84    6.38
  -7  -4   0  152.47    6.36
  -7  -4   0  152.68    6.45
  -7  -4   0  156.18    6.43
  -7   4   0  142.55    6.19
  -7   4   0  150.36    6.12
  -7   4   0  149.70    6.05
  -7   4   0  151.81    8.51
  -7   4   0  148.53    6.16
  -7   4   0  151.86    6.17
  -7   4   0  144.27    5.95
  -8  -4   0    1.37    2.55
  -8  -4   0   -0.90    1.75
  -8  -4   0    4.92    2.37
  -8  -4   0    0.14    1.97
  -8  -4   0    0.21    1.83
  -8  -4   0    0.61    2.14
  -8   4   0    2.63    3.15
  -8   4   0    3.33    2.18
  -8   4   0    1.22    1.87
  -8   4   0   -1.88    1.93
  -8   4   0    1.48    2.02
  -8   4   0   -2.87    1.82
  -8   4   0   -1.84    2.09
  -9  -4   0    0.99    2.13
  -9  -4   0    0.60    2.40
  -9  -4   0   -0.25    2.04
  -9  -4   0    2.68    2.34
  -9  -4   0    1.08    2.19
  -9  -4   0   -0.83    2.47
  -9   4   0    1.86    3.56
  -9   4   0    1.88    2.42
  -9   4   0    2.35    2.28
  -9   4   0    1.47    2.06
  -9   4   0    1.23    2.40
 -10  -4   0    1.24    3.09
 -10  -4   0    2.78    2.65
 -10  -4   0    2.40    2.76
 -10  -4   0    1.17    2.62
 -10  -4   0    2.17    2.77
 -10   4   0    8.45    3.00
 -10   4   0    2.36    4.17
 -10   4   0   -2.23    2.40
 -10   4   0    3.12    2.83
 -11  -4   0   -3.02    2.60
 -11  -4   0    3.36    3.01
 -11  -4   0   -3.35    2.75
 -11  -4   0    3.15    3.05
 -11  -4   0    0.38    2.87
 -11   4   0    0.01    2.83
 -11   4   0    0.08    2.87
 -11   4   0   -1.13    4.42
 -12  -4   0   -2.22    2.88
 -12  -4   0   -5.33    2.80
 -12   4   0    3.97    5.25
 -12   4   0   -0.57    3.20
 -12   4   0    0.33    3.06
 -13  -4   0    1.08    3.74
 -13   4   0   -5.18    5.10
 -13   4   0   -2.59    3.35
 -13   4   0   -3.59    3.39
   0  -5   0   -0.58    1.47
   0  -5   0    0.60    1.45
   0   5   0   -0.10    1.39
   0   5   0    1.12    1.68
   0   5   0    3.46    1.77
   0   5   0    1.47    1.71
  -1  -5   0   94.30    4.71
   1  -5   0  103.25    4.49
  -1  -5   0   96.36    4.51
   1   5   0  108.16    4.90
  -1   5   0  108.90    4.87
  -1   5   0  102.07    4.56
  -1   5   0  115.01    5.01
   1   5   0  100.99    4.90
   2  -5   0   10.94    1.97
  -2  -5   0   10.61    1.73
  -2  -5   0    9.09    2.05
  -2  -5   0    5.06    1.73
  -2  -5   0    7.24    1.89
  -2  -5   0    8.68    2.15
   2   5   0    9.26    2.13
  -2   5   0    9.14    2.08
  -2   5   0    9.41    2.23
  -2   5   0    8.48    1.78
  -2   5   0    7.08    2.18
  -2   5   0   10.21    2.30
  -3  -5   0   12.31    2.27
  -3  -5   0    9.96    1.84
  -3  -5   0   14.54    2.82
   3  -5   0   12.24    1.98
  -3  -5   0   16.98    2.48
  -3  -5   0    9.20    2.15
  -3   5   0   10.35    2.18
  -3   5   0   13.42    2.42
   3   5   0   13.03    2.26
  -3   5   0    7.80    2.15
  -3   5   0    5.48    1.97
  -3   5   0   10.65    2.23
  -3   5   0   15.91    2.91
  -4  -5   0   45.36    3.93
  -4  -5   0   52.35    3.42
   4  -5   0   49.58    2.93
  -4  -5   0   48.99    3.74
  -4  -5   0   50.11    3.93
  -4  -5   0   47.83    3.99
  -4  -5   0   45.46    3.70
  -4   5   0   48.26    4.03
  -4   5   0   53.96    3.93
  -4   5   0   46.80    3.60
   4   5   0   52.25    3.42
  -4   5   0   46.88    4.84
  -4   5   0   53.14    3.63
  -4   5   0   52.41    3.94
  -5  -5   0   12.37    2.33
  -5  -5   0   13.91    2.55
  -5  -5   0   13.67    2.51
  -5  -5   0   11.68    2.59
  -5  -5   0    9.87    2.38
  -5  -5   0    8.72    2.21
  -5   5   0   13.25    2.49
  -5   5   0   17.76    3.56
  -5   5   0   14.60    2.42
  -5   5   0   14.22    2.36
  -5   5   0   15.69    2.74
  -5   5   0   18.24    2.66
   5   5   0   13.12    1.94
  -6  -5   0   98.46    5.36
  -6  -5   0  102.71    5.63
  -6  -5   0   95.24    5.24
  -6  -5   0  105.69    5.31
  -6  -5   0  102.18    5.36
  -6  -5   0  100.27    5.23
  -6   5   0  106.37    6.98
  -6   5   0  100.34    5.01
  -6   5   0  107.86    5.36
  -6   5   0   85.88    5.06
  -6   5   0   95.87    5.02
  -6   5   0   94.28    4.94
  -7  -5   0   80.09    5.13
  -7  -5   0   84.94    5.48
  -7  -5   0   72.80    4.92
  -7  -5   0   83.09    5.45
  -7  -5   0   81.62    5.30
  -7  -5   0   68.84    5.07
  -7   5   0   78.89    4.84
  -7   5   0   77.88    4.94
  -7   5   0   77.22    4.97
  -7   5   0   82.78    5.15
  -7   5   0   74.48    4.96
  -7   5   0   85.11    7.55
  -8  -5   0   78.90    5.41
  -8  -5   0   81.10    5.96
  -8  -5   0   77.93    5.62
  -8  -5   0   81.18    5.66
  -8  -5   0   71.64    5.55
  -8  -5   0   68.46    5.19
  -8   5   0   79.48    5.48
  -8   5   0   68.27    5.22
  -8   5   0   69.41    5.19
  -8   5   0   68.41    4.98
  -8   5   0   73.18    7.99
  -8   5   0   84.20    5.33
  -9  -5   0    0.69    2.49
  -9  -5   0    4.57    2.58
  -9  -5   0    1.80    2.55
  -9  -5   0    4.70    2.95
  -9  -5   0    3.29    2.49
  -9   5   0    2.69    2.45
  -9   5   0    4.80    3.83
  -9   5   0   -0.83    2.23
  -9   5   0    3.15    2.57
  -9   5   0    2.45    2.47
  -9   5   0   -1.01    1.95
 -10  -5   0    3.02    2.80
 -10  -5   0    1.25    2.49
 -10  -5   0    2.00    2.79
 -10  -5   0    3.69    2.95
 -10  -5   0    3.49    3.01
 -10   5   0    1.12    2.72
 -10   5   0    5.18    3.03
 -10   5   0    5.35    2.88
 -10   5   0   -3.12    3.74
 -10   5   0    6.64    2.70
 -11  -5   0   -1.54    2.66
 -11  -5   0   -6.11    2.66
 -11  -5   0   -3.04    2.55
 -11  -5   0   -2.04    2.85
 -11   5   0   -0.67    3.11
 -11   5   0   -1.52    4.24
 -11   5   0   -1.89    2.73
 -11   5   0    0.65    2.98
 -12  -5   0   21.18    4.74
 -12  -5   0   18.79    4.62
 -12  -5   0   23.51    5.06
 -12   5   0   16.18    4.34
 -12   5   0   18.45    6.61
 -12   5   0   13.71    4.11
   0  -6   0   39.54    3.60
   0  -6   0   39.44    3.68
   0   6   0   36.25    3.81
   0   6   0   38.45    3.76
   0   6   0   38.51    3.88
  -1  -6   0  132.92    5.90
  -1  -6   0  146.84    5.84
   1  -6   0  142.35    5.59
   1   6   0  149.90    6.05
  -1   6   0  139.20    6.05
   1   6   0  143.05    6.13
  -1   6   0  131.31    5.43
  -1   6   0  127.86    5.73
   2  -6   0  186.36    6.42
  -2  -6   0  187.06    6.87
  -2  -6   0  179.69    6.66
  -2  -6   0  187.98    6.97
  -2  -6   0  197.06    6.84
  -2   6   0  193.90    6.74
  -2   6   0  191.53    6.98
  -2   6   0  185.37    6.91
   2   6   0  199.86    6.85
  -2   6   0  191.19    6.93
  -3  -6   0  398.37    9.49
  -3  -6   0  417.36   11.06
   3  -6   0  403.57   10.14
  -3  -6   0  417.89   10.91
  -3  -6   0  386.90   10.74
  -3  -6   0  422.72   11.45
  -3   6   0  411.50   11.47
  -3   6   0  409.82   10.85
  -3   6   0  401.75   10.92
  -3   6   0  420.82   10.77
  -3   6   0  405.62   11.11
   3   6   0  410.93   10.66
  -3   6   0  419.53   11.18
  -4  -6   0  877.37   19.93
  -4  -6   0  882.00   19.34
  -4  -6   0  849.80   19.16
  -4  -6   0  881.45   19.26
  -4  -6   0  896.27   19.87
   4  -6   0  860.95   17.79
  -4  -6   0  888.25   17.85
  -4   6   0  887.44   19.53
   4   6   0  861.41   18.41
  -4   6   0  890.72   18.99
  -4   6   0  892.52   20.31
  -4   6   0  890.34   19.58
  -4   6   0  894.41   19.21
  -4   6   0  898.81   19.10
  -5  -6   0   93.62    5.27
  -5  -6   0   96.46    5.25
  -5  -6   0   92.61    5.10
  -5  -6   0   90.22    5.57
  -5  -6   0   99.54    5.37
   5  -6   0   99.31    3.95
  -5  -6   0   98.73    4.77
  -5   6   0  105.83    5.24
  -5   6   0  104.85    5.53
  -5   6   0  102.17    5.23
   5   6   0  100.15    4.57
  -5   6   0   99.82    5.44
  -5   6   0   96.32    5.16
  -5   6   0   98.62    6.30
  -6  -6   0   13.90    2.68
  -6  -6   0   14.81    3.11
  -6  -6   0   15.02    3.02
  -6  -6   0   10.18    2.46
  -6  -6   0   17.64    2.98
  -6  -6   0   10.00    2.69
  -6   6   0   13.98    2.60
  -6   6   0   11.85    2.56
  -6   6   0   19.34    3.23
  -6   6   0   15.63    4.05
  -6   6   0   13.65    2.79
  -6   6   0    9.88    2.57
  -7  -6   0  141.58    6.70
  -7  -6   0  137.22    6.75
  -7  -6   0  145.27    7.07
  -7  -6   0  136.44    7.18
  -7  -6   0  141.61    6.92
  -7  -6   0  131.87    6.64
  -7   6   0  129.72    6.55
  -7   6   0  132.68    8.54
  -7   6   0  134.02    6.51
  -7   6   0  135.22    6.65
  -7   6   0  139.06    6.51
  -7   6   0  132.19    6.46
  -8  -6   0   74.94    6.40
  -8  -6   0   75.23    5.90
  -8  -6   0   76.14    5.60
  -8  -6   0   69.39    5.97
  -8  -6   0   76.79    5.82
  -8   6   0   86.69    5.58
  -8   6   0   78.96    8.36
  -8   6   0   84.80    5.75
  -8   6   0   77.66    5.77
  -8   6   0   77.56    5.61
  -8   6   0   71.33    5.46
  -9  -6   0   10.88    3.50
  -9  -6   0   10.19    3.34
  -9  -6   0    7.83    2.79
  -9  -6   0   13.19    3.57
  -9  -6   0   14.43    3.61
  -9   6   0   15.85    3.65
  -9   6   0   14.29    3.67
  -9   6   0   11.51    3.31
  -9   6   0   12.12    4.68
  -9   6   0   10.30    3.02
 -10  -6   0   56.51    5.84
 -10  -6   0   52.86    5.96
 -10  -6   0   56.09    6.39
 -10  -6   0   47.27    5.63
 -10   6   0   52.47    5.76
 -10   6   0   45.92    5.10
 -10   6   0   39.99    5.08
 -10   6   0   48.65    7.72
 -10   6   0   54.01    5.84
 -11  -6   0   59.68    6.38
 -11  -6   0   69.59    7.34
 -11  -6   0   62.39    7.01
 -11  -6   0   54.22    6.17
 -11   6   0   65.82    6.71
 -11   6   0   53.52    5.95
 -11   6   0   37.84    7.61
 -11   6   0   57.38    6.17
 -12  -6   0   14.12    4.45
 -12  -6   0   18.02    4.87
 -12  -6   0    6.42    4.08
 -12   6   0    0.59    3.35
 -12   6   0   10.35    6.18
 -12   6   0   11.03    4.26
   0  -7   0    0.74    1.87
   0  -7   0   -1.67    1.64
   0   7   0    1.32    2.03
   0   7   0    0.50    1.92
   0   7   0   -0.65    1.93
  -1  -7   0   27.11    3.39
  -1  -7   0   25.45    3.76
   1  -7   0   19.10    3.04
   1  -7   0   16.71    2.67
   1   7   0   18.54    3.18
  -1   7   0   24.56    3.45
   1   7   0   22.59    3.27
  -1   7   0   17.56    3.00
  -1   7   0   19.74    2.93
   2  -7   0  132.36    5.68
  -2  -7   0  124.65    5.78
  -2  -7   0  132.75    6.07
  -2  -7   0  118.81    5.88
  -2  -7   0  132.61    6.17
   2   7   0  120.05    5.98
  -2   7   0  125.97    5.69
  -2   7   0  119.74    6.05
  -2   7   0  137.98    6.16
  -2   7   0  113.27    5.86
  -2   7   0  128.44    5.94
  -3  -7   0   19.67    3.14
  -3  -7   0   14.30    2.13
  -3  -7   0   14.41    2.66
  -3  -7   0   17.11    2.72
  -3  -7   0   19.16    3.03
   3  -7   0   16.16    2.64
   3   7   0   22.80    3.21
  -3   7   0   12.83    2.37
  -3   7   0   19.10    2.99
  -3   7   0   18.77    3.38
  -3   7   0   21.11    3.18
  -3   7   0   14.86    2.95
  -4  -7   0    6.49    2.19
  -4  -7   0    6.63    2.43
  -4  -7   0    9.54    2.01
  -4  -7   0    4.03    2.22
   4  -7   0    8.17    2.07
  -4  -7   0    7.42    2.26
  -4  -7   0    4.69    2.22
  -4   7   0    6.06    2.23
  -4   7   0    2.73    1.93
  -4   7   0   12.12    3.20
  -4   7   0    6.60    2.58
  -4   7   0    1.57    1.94
  -4   7   0   10.30    2.62
   4   7   0   10.37    2.45
  -5  -7   0   43.27    3.80
   5  -7   0   45.37    3.27
  -5  -7   0   37.81    4.26
  -5  -7   0   49.80    4.70
  -5  -7   0   35.77    4.32
  -5  -7   0   47.84    4.65
  -5  -7   0   49.86    4.75
  -5   7   0   46.42    4.64
  -5   7   0   48.02    5.65
  -5   7   0   42.19    4.14
   5   7   0   45.89    4.19
  -5   7   0   41.12    4.39
  -5   7   0   44.78    4.30
  -5   7   0   42.08    4.40
  -6  -7   0   -3.05    1.59
  -6  -7   0    0.29    1.54
  -6  -7   0    1.02    2.31
  -6  -7   0    1.99    1.94
  -6  -7   0   -1.27    2.07
  -6  -7   0    0.90    1.86
  -6   7   0    3.46    2.16
  -6   7   0   -0.13    2.13
  -6   7   0   -0.23    1.83
  -6   7   0   -1.98    2.06
  -6   7   0    1.56    2.01
  -6   7   0   -0.22    2.51
  -7  -7   0    4.48    2.68
  -7  -7   0    6.34    2.47
  -7  -7   0    1.16    2.62
  -7  -7   0    1.50    2.10
  -7  -7   0    3.02    2.70
  -7   7   0    3.14    2.32
  -7   7   0    2.28    2.20
  -7   7   0    3.91    3.52
  -7   7   0    4.01    2.47
  -7   7   0    1.27    2.74
  -7   7   0    2.40    2.41
  -8  -7   0   19.48    3.94
  -8  -7   0   17.37    3.62
  -8  -7   0   19.59    3.59
  -8  -7   0   15.66    3.51
  -8  -7   0   16.52    3.88
  -8   7   0   13.06    3.21
  -8   7   0   14.71    3.38
  -8   7   0   17.49    3.49
  -8   7   0    4.26    4.01
  -8   7   0   11.22    3.34
  -9  -7   0   61.05    6.37
  -9  -7   0   61.20    6.29
  -9  -7   0   66.47    6.16
  -9  -7   0   49.08    5.78
  -9   7   0   57.54    5.77
  -9   7   0   70.30    8.58
  -9   7   0   59.26    5.85
  -9   7   0   62.80    6.11
  -9   7   0   68.22    6.39
 -10  -7   0    5.91    3.34
 -10  -7   0    3.30    3.24
 -10  -7   0   -1.36    3.03
 -10  -7   0   -1.48    2.56
 -10   7   0   -3.02    2.57
 -10   7   0   -2.38    2.88
 -10   7   0   -0.79    4.34
 -10   7   0   -2.56    2.51
 -10   7   0    1.17    3.26
 -11  -7   0    1.36    3.21
 -11  -7   0   -3.95    3.17
 -11  -7   0    0.55    2.91
 -11  -7   0   -2.20    3.40
 -11   7   0   -1.55    3.10
 -11   7   0    4.21    4.84
 -11   7   0   -0.13    3.18
 -11   7   0    4.11    3.28
 -11   7   0    1.03    3.44
 -12  -7   0    1.89    3.98
 -12  -7   0   -3.67    3.83
 -12  -7   0    0.09    3.81
 -12  -7   0   -0.92    3.11
 -12   7   0    3.00    3.90
 -12   7   0   -0.99    3.35
 -12   7   0   -3.16    5.39
   0  -8   0   99.73    5.51
   0  -8   0   81.44    5.30
   0   8   0   90.61    5.63
   0   8   0   78.63    5.31
   0   8   0   86.81    5.69
  -1  -8   0   83.27    5.26
  -1  -8   0   90.16    5.47
   1  -8   0   82.81    5.40
   1  -8   0   78.91    4.99
   1   8   0   74.50    5.32
  -1   8   0   78.31    5.55
  -1   8   0   87.55    4.97
  -1   8   0   74.92    5.30
   1   8   0   77.50    5.41
  -2  -8   0   37.73    4.35
  -2  -8   0   28.35    3.64
  -2  -8   0   38.57    4.31
  -2  -8   0   32.53    3.84
   2  -8   0   35.50    3.87
  -2   8   0   33.67    4.10
  -2   8   0   36.67    4.76
   2   8   0   35.13    4.26
  -2   8   0   27.87    3.67
  -2   8   0   38.17    4.45
   2   8   0   32.65    3.93
  -2   8   0   33.43    4.24
  -3  -8   0  126.78    6.18
  -3  -8   0  134.99    5.18
  -3  -8   0  136.08    6.83
   3  -8   0  145.20    6.07
  -3  -8   0  136.41    6.70
  -3  -8   0  128.95    6.50
  -3   8   0  152.30    6.99
  -3   8   0  133.27    6.85
  -3   8   0  137.26    6.53
  -3   8   0  137.12    6.36
   3   8   0  140.99    6.55
  -3   8   0  136.69    6.77
  -4  -8   0   45.26    4.56
   4  -8   0   45.21    3.95
  -4  -8   0   45.34    4.37
  -4  -8   0   48.42    3.36
  -4  -8   0   51.45    5.59
  -4  -8   0   37.33    4.18
  -4   8   0   50.28    5.06
  -4   8   0   58.56    5.49
  -4   8   0   46.75    5.18
   4   8   0   46.86    4.71
  -4   8   0   42.62    4.61
  -4   8   0   38.62    4.15
  -4   8   0   42.67    4.53
  -5  -8   0   13.83    2.54
  -5  -8   0   13.57    2.86
  -5  -8   0   14.19    2.98
  -5  -8   0   15.42    3.38
  -5  -8   0   14.48    3.39
  -5   8   0   14.36    3.24
  -5   8   0   10.91    3.00
   5   8   0   11.95    2.73
  -5   8   0   20.57    4.35
  -5   8   0   15.73    3.15
  -5   8   0    9.47    2.65
  -5   8   0   11.34    2.72
  -6  -8   0    0.93    2.05
  -6  -8   0    2.42    2.66
  -6  -8   0    2.54    2.62
  -6  -8   0    1.72    2.46
  -6  -8   0    1.25    1.93
  -6   8   0    2.50    2.62
  -6   8   0    0.64    2.97
  -6   8   0    1.10    2.41
  -6   8   0   -3.21    1.68
  -6   8   0    0.67    2.20
  -7  -8   0   25.11    3.93
  -7  -8   0   27.00    3.85
  -7  -8   0   24.14    4.41
  -7  -8   0   29.96    4.54
  -7  -8   0   28.56    4.38
  -7   8   0   27.51    4.43
  -7   8   0   28.86    5.50
  -7   8   0   29.34    4.26
  -7   8   0   31.68    4.32
  -7   8   0   28.40    4.41
  -8  -8   0   16.54    3.72
  -8  -8   0   14.68    3.36
  -8  -8   0   22.58    4.37
  -8  -8   0   11.21    3.69
  -8  -8   0    5.09    3.23
  -8   8   0   10.17    3.34
  -8   8   0    7.13    3.30
  -8   8   0    8.75    3.61
  -8   8   0   17.50    3.87
  -8   8   0   16.72    5.06
  -9  -8   0    2.44    3.11
  -9  -8   0   -2.58    2.46
  -9  -8   0   -0.53    3.04
  -9  -8   0   -0.83    2.91
  -9   8   0   -0.80    2.90
  -9   8   0   -0.69    2.96
  -9   8   0   -1.14    2.69
  -9   8   0   -2.61    2.83
  -9   8   0    5.83    4.59
 -10  -8   0    7.14    4.12
 -10  -8   0    1.88    2.98
 -10  -8   0    5.02    3.85
 -10  -8   0    4.71    3.55
 -10   8   0    4.25    3.69
 -10   8   0    3.95    3.10
 -10   8   0    4.11    5.22
 -10   8   0    7.18    3.62
 -10   8   0    8.00    3.95
 -11  -8   0   -1.50    3.58
 -11  -8   0   -2.05    3.43
 -11  -8   0   -0.69    3.63
 -11   8   0   -7.96    4.21
 -11   8   0   -4.96    3.34
 -11   8   0    2.21    3.51
 -11   8   0    3.45    3.49
 -11   8   0    6.21    3.98
 -12  -8   0   24.62    5.85
 -12  -8   0   22.80    5.50
 -12  -8   0   37.25    6.53
 -12   8   0   20.71    5.47
 -12   8   0   20.89    4.75
 -12   8   0   16.69    4.82
 -12   8   0   30.23    7.97
   0  -9   0   -0.48    2.29
   0  -9   0    1.90    2.04
   0   9   0    0.90    1.97
   0   9   0   -4.62    1.81
   0   9   0    1.90    2.20
   1  -9   0   85.19    5.48
   1  -9   0   79.03    5.59
  -1  -9   0   76.32    5.42
   1   9   0   77.95    5.72
   1   9   0   63.08    5.51
  -1   9   0   76.60    5.08
  -1   9   0   72.83    5.65
  -1   9   0   74.52    5.72
  -2  -9   0  806.43   20.25
  -2  -9   0  826.09   19.67
   2  -9   0  832.05   19.14
  -2  -9   0  769.60   19.27
  -2   9   0  821.77   19.74
  -2   9   0  837.28   19.08
   2   9   0  816.87   20.42
  -2   9   0  800.57   19.40
   2   9   0  821.61   19.68
  -2   9   0  845.19   20.51
  -3  -9   0  146.82    7.32
   3  -9   0  148.33    6.68
  -3  -9   0  156.07    5.79
  -3  -9   0  152.03    7.65
  -3  -9   0  160.28    7.46
  -3  -9   0  139.08    6.91
  -3   9   0  158.95    7.66
  -3   9   0  153.12    7.11
  -3   9   0  146.18    5.00
  -3   9   0  160.33    7.68
  -3   9   0  156.41    7.32
  -3   9   0  155.16    7.56
   3   9   0  153.61    7.27
  -4  -9   0    6.02    2.01
   4  -9   0    6.13    2.32
  -4  -9   0   12.11    3.08
  -4  -9   0    5.54    2.51
  -4  -9   0    7.80    3.12
  -4  -9   0    6.43    2.43
  -4   9   0    6.06    2.87
   4   9   0    4.14    2.50
  -4   9   0   11.20    2.77
  -4   9   0   10.36    2.88
  -4   9   0    5.51    2.55
  -4   9   0    9.18    3.53
  -4   9   0   12.83    3.22
  -5  -9   0  279.03    8.58
  -5  -9   0  287.05   10.35
  -5  -9   0  282.91   10.97
  -5  -9   0  291.12   10.70
  -5  -9   0  291.29   10.73
  -5   9   0  295.23   10.45
  -5   9   0  274.84   10.38
  -5   9   0  273.48    9.97
   5   9   0  262.64    9.47
  -5   9   0  260.22   10.98
  -5   9   0  277.51   10.51
  -6  -9   0  331.70   11.93
  -6  -9   0  333.75   11.97
  -6  -9   0  325.71   11.57
  -6  -9   0  334.01   12.30
  -6  -9   0  326.47    9.98
  -6   9   0  353.60   11.87
  -6   9   0  334.09   11.86
  -6   9   0  350.34   12.08
  -6   9   0  324.78   12.97
  -6   9   0  353.00   11.69
  -7  -9   0    9.40    2.92
  -7  -9   0   10.93    3.74
  -7  -9   0   14.74    4.03
  -7  -9   0   13.08    3.61
  -7  -9   0   10.34    3.29
  -7   9   0   12.83    4.83
  -7   9   0   11.45    3.55
  -7   9   0   11.76    3.74
  -7   9   0   13.36    3.83
  -7   9   0   10.31    3.23
  -8  -9   0  219.05   10.58
  -8  -9   0  225.85    9.90
  -8  -9   0  230.23   10.67
  -8  -9   0  206.67   10.41
  -8   9   0  200.08    9.62
  -8   9   0  226.32    9.92
  -8   9   0  213.88    9.77
  -8   9   0  218.35   12.01
  -8   9   0  228.80   10.31
  -9  -9   0  203.57   10.52
  -9  -9   0  174.32   10.39
  -9  -9   0  185.53   10.25
  -9  -9   0  197.48    9.75
  -9   9   0  195.38   10.10
  -9   9   0  195.94    9.62
  -9   9   0  204.41    9.92
  -9   9   0  199.90    9.89
  -9   9   0  180.02   11.93
 -10  -9   0    0.21    3.64
 -10  -9   0    1.78    3.08
 -10  -9   0   -4.11    3.18
 -10   9   0    6.63    4.92
 -10   9   0   -0.37    3.40
 -10   9   0    2.35    3.74
 -10   9   0    2.47    3.11
 -10   9   0   -2.85    3.02
 -11  -9   0    4.70    4.57
 -11  -9   0    4.02    4.51
 -11  -9   0    5.54    3.72
 -11   9   0    3.29    3.81
 -11   9   0    1.49    5.12
 -11   9   0    3.76    3.45
 -11   9   0    6.34    4.02
 -11   9   0    4.83    4.39
 -12  -9   0   21.71    5.31
 -12  -9   0   42.21    7.31
 -12  -9   0   41.88    7.11
 -12   9   0   35.60    6.01
 -12   9   0   35.98    8.52
 -12   9   0   21.03    4.98
 -12   9   0   28.95    5.69
   0 -10   0    7.83    2.59
   0 -10   0   11.06    2.87
   0  10   0   15.70    4.05
   0  10   0   11.25    3.20
  -1 -10   0   10.75    2.99
   1 -10   0   10.94    3.46
  -1 -10   0   11.51    2.80
   1 -10   0   24.56    3.82
   1  10   0   15.51    3.67
  -1  10   0   13.22    3.84
  -1  10   0   10.49    3.38
  -1  10   0   14.06    3.28
  -1  10   0   23.92    4.30
   1  10   0   22.49    4.37
   2 -10   0   34.05    4.36
  -2 -10   0   29.45    3.88
   2 -10   0   30.19    4.10
  -2 -10   0   29.52    4.34
  -2 -10   0   32.57    4.31
  -2  10   0   26.04    4.26
  -2  10   0   32.67    4.44
  -2  10   0   31.99    4.82
  -2  10   0   25.18    4.01
   2  10   0   23.04    4.20
   2  10   0   29.67    4.44
  -2  10   0   36.83    4.71
  -3 -10   0  129.96    7.26
  -3 -10   0  130.84    6.83
  -3 -10   0  137.51    7.35
  -3 -10   0  127.06    7.55
   3 -10   0  114.08    6.33
  -3 -10   0  126.17    5.51
   3  10   0  133.20    7.21
  -3  10   0  125.04    7.39
  -3  10   0  125.48    7.61
  -3  10   0  132.24    7.02
  -3  10   0  140.88    7.39
  -3  10   0  133.33    4.96
  -3  10   0  120.98    7.14
  -4 -10   0   11.12    3.11
  -4 -10   0   13.53    2.49
  -4 -10   0   20.41    4.40
  -4 -10   0   13.42    3.15
  -4 -10   0   14.32    3.53
   4 -10   0   17.26    3.13
  -4  10   0   15.21    3.64
   4  10   0   17.65    3.68
  -4  10   0   20.17    4.26
  -4  10   0   15.25    3.77
  -4  10   0   13.09    3.72
  -4  10   0   15.28    3.62
  -5 -10   0   -4.16    2.18
  -5 -10   0    0.04    2.41
  -5 -10   0    3.77    2.34
  -5 -10   0   -1.18    2.50
  -5 -10   0    0.28    1.81
  -5  10   0    1.46    2.85
  -5  10   0    0.64    2.32
  -5  10   0    0.42    2.70
  -5  10   0   -0.39    3.09
  -5  10   0    1.01    2.92
  -6 -10   0  230.42    9.92
  -6 -10   0  243.94   10.94
  -6 -10   0  214.64   10.06
  -6 -10   0  220.79    8.09
  -6  10   0  242.61   10.21
  -6  10   0  219.65   10.14
  -6  10   0  217.34   11.18
  -6  10   0  236.73    9.98
  -6  10   0  247.37   10.47
  -7 -10   0   75.16    7.50
  -7 -10   0   67.15    6.94
  -7 -10   0   64.02    6.30
  -7  10   0   68.52    6.73
  -7  10   0   86.98    7.85
  -7  10   0   67.21    6.32
  -7  10   0   52.52    7.38
  -7  10   0   72.36    7.16
  -8 -10   0   -0.35    3.35
  -8 -10   0   -0.25    3.18
  -8 -10   0    0.00    2.64
  -8  10   0    1.24    3.28
  -8  10   0    0.74    2.89
  -8  10   0   -7.84    3.42
  -8  10   0   -2.31    2.78
  -8  10   0    0.19    2.65
  -9 -10   0    0.47    3.76
  -9 -10   0   -2.48    2.56
  -9 -10   0   -5.12    3.33
  -9  10   0   -0.86    4.16
  -9  10   0    0.99    3.63
  -9  10   0   -0.84    3.26
  -9  10   0    0.91    3.26
  -9  10   0    1.51    3.15
 -10 -10   0   -2.63    3.05
 -10 -10   0    1.45    3.84
 -10 -10   0   -3.78    3.76
 -10  10   0   -0.29    3.34
 -10  10   0   -5.00    3.55
 -10  10   0    0.84    4.67
 -10  10   0    6.35    4.28
 -10  10   0   -0.60    3.28
 -11 -10   0   40.49    7.26
 -11 -10   0   43.09    7.28
 -11  10   0   35.07    6.66
 -11  10   0   30.41    5.93
 -11  10   0   37.27    8.58
 -11  10   0   40.34    6.06
   0 -11   0    0.65    2.29
   0 -11   0   -3.87    1.71
   0  11   0    1.99    2.81
   0  11   0    4.61    2.77
  -1 -11   0   21.14    4.04
   1 -11   0   20.09    3.74
  -1 -11   0   16.45    3.21
   1 -11   0   21.37    4.19
  -1  11   0   27.21    4.43
   1  11   0   18.37    4.15
   1  11   0   20.14    4.17
  -1  11   0   19.81    4.15
  -1  11   0   16.15    3.63
  -2 -11   0   58.52    6.74
   2 -11   0   46.62    5.17
  -2 -11   0   46.19    5.40
  -2  11   0   37.69    4.91
  -2  11   0   37.68    4.92
  -2  11   0   48.41    5.68
   2  11   0   44.70    5.68
  -2  11   0   36.26    4.84
  -3 -11   0  287.38   11.66
   3 -11   0  292.38   10.43
  -3 -11   0  304.80   11.44
  -3 -11   0  268.77   11.13
  -3  11   0  299.37   11.82
   3  11   0  286.05   11.04
  -3  11   0  256.11   10.89
  -3  11   0  289.11   11.23
  -3  11   0  303.21   11.26
   4 -11   0    2.40    2.42
  -4 -11   0    2.91    1.83
  -4 -11   0    9.72    3.42
  -4 -11   0    7.41    2.51
  -4 -11   0   -1.17    2.72
  -4  11   0    4.77    3.24
  -4  11   0   -1.78    2.84
   4  11   0    1.59    2.84
  -4  11   0    6.75    3.14
  -4  11   0    0.67    2.82
  -5 -11   0    8.77    3.24
  -5 -11   0    4.13    2.52
  -5 -11   0    5.26    2.13
  -5 -11   0    7.84    3.36
  -5  11   0   11.12    4.25
  -5  11   0   12.70    4.62
  -5  11   0    3.31    3.07
  -5  11   0    9.11    3.13
  -6 -11   0    2.64    2.44
  -6 -11   0    1.12    3.14
  -6 -11   0    1.66    3.15
  -6  11   0   -0.86    2.69
  -6  11   0    0.59    3.64
  -6  11   0    5.98    3.44
  -6  11   0   -1.15    3.44
  -7 -11   0   -2.97    3.02
  -7 -11   0    2.13    2.97
  -7 -11   0    2.90    3.59
  -7  11   0    1.51    3.11
  -7  11   0   -2.55    3.23
  -7  11   0   -0.66    3.22
  -7  11   0    1.83    3.95
  -8 -11   0  109.36    9.75
  -8 -11   0  110.07    9.60
  -8  11   0   83.83    8.23
  -8  11   0   98.41    8.78
  -8  11   0   90.03   10.09
  -8  11   0   81.01    8.17
  -9 -11   0    8.97    4.41
  -9 -11   0    3.49    3.98
  -9  11   0    3.93    4.28
  -9  11   0    1.81    3.80
  -9  11   0    7.96    5.81
  -9  11   0    2.76    3.53
 -10 -11   0   41.50    7.17
 -10 -11   0   38.71    6.72
 -10  11   0   36.92    7.97
 -10  11   0   37.47    6.19
 -10  11   0   18.80    6.17
 -10  11   0   27.58    5.66
 -11 -11   0    3.90    5.12
 -11 -11   0   -0.88    4.76
 -11  11   0    4.03    4.82
 -11  11   0    2.18    3.81
 -11  11   0    0.05    4.44
 -11  11   0    5.90    5.52
   0 -12   0  580.41   17.00
   0 -12   0  547.88   17.40
   0  12   0  567.57   17.43
   0  12   0  604.58   18.04
  -1 -12   0   16.01    4.09
  -1 -12   0   16.74    3.88
   1 -12   0   17.78    4.03
  -1  12   0   12.45    3.97
  -1  12   0   13.99    3.94
   1  12   0   17.26    4.18
   1  12   0   12.18    3.70
  -1  12   0   20.04    4.25
  -2 -12   0   28.03    5.45
  -2 -12   0   32.54    4.88
   2 -12   0   29.51    4.43
  -2  12   0   30.33    4.83
  -2  12   0   34.66    5.61
   2  12   0   22.87    4.46
  -2  12   0   37.20    5.36
  -2  12   0   25.36    4.67
  -3 -12   0   89.06    8.63
   3 -12   0   85.74    6.43
  -3 -12   0   66.08    6.79
  -3  12   0  103.75    7.75
   3  12   0   74.89    7.08
  -3  12   0  107.91    9.31
  -3  12   0   72.44    7.17
   4 -12   0   36.87    5.26
  -4 -12   0   27.42    5.37
  -4 -12   0   39.06    4.13
  -4 -12   0   25.73    5.15
  -4  12   0   32.46    5.48
   4  12   0   36.83    5.40
  -4  12   0   47.34    6.93
  -4  12   0   32.33    5.14
  -5 -12   0   -1.34    2.63
  -5 -12   0    0.42    2.97
  -5  12   0    4.19    3.75
  -5  12   0    4.16    3.04
  -5  12   0   -7.32    3.02
  -5  12   0   -0.25    3.22
  -6 -12   0   45.43    6.37
  -6 -12   0   28.70    5.90
  -6  12   0   33.13    6.14
  -6  12   0   23.58    4.97
  -6  12   0   27.67    5.79
  -6  12   0   24.02    5.01
  -7 -12   0   44.35    6.83
  -7 -12   0   28.85    5.86
  -7  12   0   31.69    5.90
  -7  12   0   23.84    4.66
  -7  12   0   33.38    6.75
  -7  12   0   31.88    5.99
  -8 -12   0  166.21   10.94
  -8 -12   0  175.32   11.14
  -8  12   0  155.29   10.14
  -8  12   0  190.01   10.50
  -8  12   0  160.40   10.78
  -8  12   0  148.63   12.92
  -9 -12   0   17.00    5.43
  -9 -12   0    4.08    4.79
  -9  12   0    4.82    4.41
  -9  12   0    3.87    5.32
  -9  12   0    9.61    5.07
  -9  12   0    7.77    4.31
 -10 -12   0   21.91    6.71
 -10 -12   0   14.60    5.97
 -10  12   0   19.75    6.89
 -10  12   0    3.83    4.02
 -10  12   0   23.45    5.86
 -10  12   0   16.19    5.62
 -11 -12   0   36.97    7.78
 -11 -12   0   50.20    8.46
 -11  12   0   63.22   10.63
 -11  12   0   56.00    7.66
 -11  12   0   44.09    7.38
   0 -13   0   -0.03    2.65
   0  13   0   -5.14    2.69
   0  13   0   -2.89    2.79
  -1 -13   0  100.93    7.77
  -1 -13   0   84.29    8.40
   1 -13   0   83.40    7.32
  -1  13   0   75.04    7.80
   1  13   0   76.81    7.65
  -1  13   0  108.82    8.19
  -2 -13   0   62.14    7.23
   2 -13   0   73.85    7.04
  -2 -13   0   53.56    6.78
   2  13   0   49.92    6.27
  -2  13   0   60.42    7.14
  -2  13   0   60.38    7.05
  -2  13   0   68.81    8.15
  -2  13   0   58.37    6.37
  -3 -13   0   28.43    5.22
   3 -13   0   25.87    4.68
  -3 -13   0   22.14    4.70
   3  13   0   27.41    5.04
  -3  13   0   22.91    4.87
  -3  13   0   24.24    5.15
  -3  13   0   23.05    4.85
  -4 -13   0   55.34    7.06
  -4 -13   0   45.59    6.22
  -4  13   0   51.70    6.55
   4  13   0   51.01    6.60
  -4  13   0   60.21    7.42
  -4  13   0   53.96    6.86
  -5 -13   0   31.06    6.35
  -5 -13   0   16.57    4.39
  -5  13   0   26.51    5.48
  -5  13   0   15.10    4.95
  -5  13   0   17.39    4.53
  -6 -13   0    0.10    3.27
  -6 -13   0    1.04    3.90
  -6  13   0    3.88    4.28
  -6  13   0    1.06    3.84
  -6  13   0    0.82    3.93
  -7 -13   0    5.74    4.45
  -7 -13   0    0.71    4.16
  -7  13   0   -2.54    3.91
  -7  13   0   -0.99    3.82
  -7  13   0    3.52    4.86
  -8 -13   0   14.28    5.54
  -8 -13   0   16.39    5.17
  -8  13   0   13.32    5.61
  -8  13   0   14.42    5.65
  -8  13   0   20.25    5.61
  -9 -13   0   43.68    7.61
  -9 -13   0   42.60    7.17
  -9  13   0   38.44    7.27
  -9  13   0   33.22    7.80
  -9  13   0   44.00    7.64
 -10 -13   0    8.30    5.55
 -10 -13   0    1.98    5.14
 -10  13   0    0.35    4.44
 -10  13   0    1.86    4.72
 -10  13   0    5.69    5.64
   0 -14   0   -2.10    3.08
   0  14   0   -2.85    3.35
  -1 -14   0   64.94    7.17
   1 -14   0   64.19    6.87
  -1  14   0   71.22    8.86
  -1  14   0   65.08    7.68
   1  14   0   51.21    6.75
  -2 -14   0   13.96    4.74
  -2 -14   0   19.36    4.70
   2 -14   0   12.61    3.95
  -2  14   0   24.75    5.86
   2  14   0   25.14    5.31
  -2  14   0   11.53    4.08
  -2  14   0   14.38    4.53
   3 -14   0   11.39    4.05
  -3 -14   0   12.28    4.26
  -3 -14   0   12.23    5.19
  -3  14   0   10.09    4.45
  -3  14   0    6.76    3.97
  -3  14   0   12.18    4.43
   3  14   0   13.94    4.59
  -3  14   0    6.54    4.35
  -4 -14   0   -4.84    2.78
  -4 -14   0    0.53    3.69
   4  14   0    1.46    3.83
  -4  14   0   -2.93    3.66
  -4  14   0   -0.38    3.73
  -4  14   0   -1.61    3.64
  -5 -14   0   40.80    6.32
  -5 -14   0   41.13    6.40
  -5  14   0   42.29    7.18
  -5  14   0   33.02    6.06
  -5  14   0   32.10    6.29
  -6 -14   0   -0.49    3.50
  -6 -14   0    5.86    4.30
  -6  14   0   -2.04    3.97
  -6  14   0    6.60    4.32
  -6  14   0   -3.66    3.46
  -7 -14   0    6.15    4.84
  -7 -14   0   -1.17    4.22
  -7  14   0    5.20    4.85
  -7  14   0   -4.61    3.25
  -7  14   0   -4.99    4.14
  -8 -14   0    5.78    4.41
  -8 -14   0    7.12    4.94
  -8  14   0    4.66    4.64
  -8  14   0    2.22    4.53
  -8  14   0   13.02    5.96
  -9 -14   0   11.38    5.57
  -9 -14   0    3.54    4.73
  -9  14   0    5.23    5.03
  -9  14   0    5.13    5.35
  -9  14   0   14.76    6.89
 -10 -14   0    0.00    4.94
 -10 -14   0    7.32    6.05
 -10  14   0    7.75    4.91
 -10  14   0   10.30    6.07
 -10  14   0    5.51    7.11
   0 -15   0    2.95    3.79
   0  15   0    3.76    4.10
   1 -15   0   82.98    8.29
  -1 -15   0   71.47    7.85
   1  15   0   87.49    9.15
  -1  15   0   66.77    7.96
  -2 -15   0   46.44    7.08
   2 -15   0   45.35    6.75
  -2  15   0   35.89    6.73
   2  15   0   36.62    6.50
  -2  15   0   37.95    6.37
  -2  15   0   40.74    7.46
  -3 -15   0   17.21    5.13
  -3 -15   0   11.37    4.59
   3 -15   0   17.09    4.62
  -3  15   0   12.73    4.86
  -3  15   0   17.74    5.63
  -3  15   0    8.32    4.28
  -3  15   0   11.02    4.79
   3  15   0    8.20    4.32
  -4 -15   0    8.71    4.44
  -4 -15   0    3.31    3.79
  -4  15   0    0.79    3.90
  -4  15   0    2.39    4.10
  -4  15   0   -0.34    3.60
  -4  15   0    1.89    3.92
  -5 -15   0   52.20    7.74
  -5 -15   0   37.14    6.72
  -5  15   0   36.30    6.80
  -5  15   0   39.10    6.87
  -5  15   0   42.43    7.07
  -6 -15   0   45.24    7.47
  -6 -15   0   43.92    7.28
  -6  15   0   39.36    7.40
  -6  15   0   31.28    6.42
  -6  15   0   43.12    7.87
  -7 -15   0   -5.21    3.63
  -7 -15   0   -0.30    4.58
  -7  15   0    0.12    4.23
  -7  15   0    0.72    4.44
  -7  15   0   -6.50    3.62
  -8 -15   0   17.96    5.89
  -8 -15   0    9.71    5.95
  -8  15   0   -0.37    4.26
  -8  15   0   17.60    6.52
  -8  15   0    2.12    5.17
  -9 -15   0   33.20    7.65
  -9 -15   0   29.79    7.29
  -9  15   0   35.43    8.21
  -9  15   0   41.55    8.06
  -9  15   0   16.01    6.69
   0 -16   0   40.91    6.74
   0  16   0   41.67    7.19
  -1 -16   0   40.40    6.94
   1 -16   0   59.80    7.77
  -1  16   0   63.27    8.54
   1  16   0   52.55    7.75
  -2 -16   0   68.15    8.30
   2 -16   0   47.19    7.18
  -2  16   0   47.47    7.46
   2  16   0   62.99    8.59
  -3 -16   0   -1.81    3.78
  -3  16   0   -3.01    4.01
   3  16   0   -3.82    3.49
  -3  16   0   -3.23    3.52
  -3  16   0    4.25    4.04
  -4 -16   0    2.14    4.80
  -4 -16   0    4.82    4.43
  -4  16   0    0.40    4.20
  -4  16   0   -3.89    3.71
  -4  16   0    8.02    4.87
  -4  16   0    3.13    4.00
  -5 -16   0   -2.68    4.21
  -5 -16   0   -3.28    4.42
  -5  16   0    2.42    4.65
  -5  16   0    5.89    4.70
  -5  16   0    4.04    4.10
  -5  16   0    2.53    4.77
  -6 -16   0   10.85    5.75
  -6 -16   0    9.14    5.27
  -6  16   0   10.07    5.93
  -6  16   0   14.35    5.40
  -6  16   0   26.76    6.77
  -7 -16   0    7.11    5.71
  -7 -16   0    5.22    5.84
  -7  16   0   -1.57    4.10
  -7  16   0   11.06    5.72
  -7  16   0   12.75    6.24
  -8 -16   0   -1.84    4.87
  -8 -16   0    2.11    5.54
  -8  16   0    0.66    4.88
  -8  16   0   -0.28    4.90
  -8  16   0    1.23    5.85
  -9  16   0    0.55    5.45
   0 -17   0    2.85    4.36
   0  17   0    0.26    4.68
   1 -17   0   22.44    5.73
  -1 -17   0   19.09    5.92
   1  17   0   22.42    6.11
  -1  17   0   14.81    5.87
  -2 -17   0   -4.02    3.97
   2 -17   0    4.31    4.16
   2  17   0    1.41    4.43
  -2  17   0    5.51    5.07
  -3 -17   0   33.51    6.87
  -3  17   0   32.17    8.08
  -3  17   0   29.98    6.83
   3  17   0   37.15    7.01
  -4 -17   0   -4.94    4.44
  -4  17   0    3.77    4.65
  -4  17   0   -4.61    4.72
  -4  17   0    1.51    4.40
  -4  17   0   -2.52    3.72
  -5 -17   0    7.32    5.89
  -5 -17   0    3.31    4.78
  -5  17   0    0.16    4.61
  -5  17   0   -0.27    5.36
  -5  17   0   -2.86    4.58
  -5  17   0    6.45    5.14
  -6 -17   0    4.22    5.43
  -6 -17   0   19.74    7.19
  -6  17   0    4.54    5.23
  -6  17   0    8.43    5.60
  -6  17   0   -3.06    4.02
  -6  17   0    2.14    5.01
  -7 -17   0   -1.38    5.46
  -7 -17   0    4.79    5.96
  -7  17   0    1.72    5.60
  -7  17   0    2.28    5.69
  -7  17   0    0.04    4.63
  -8 -17   0    1.48    4.84
  -8 -17   0    4.14    6.54
  -8  17   0   -2.19    5.24
  -8  17   0   -5.88    5.33
  -8  17   0    0.06    4.98
   0 -18   0   16.64    5.84
   0  18   0   10.20    5.59
  -1 -18   0   48.51    8.28
   1 -18   0   39.78    7.49
   1  18   0   51.64    8.67
  -1  18   0   44.87    7.96
  -2 -18   0   15.86    5.69
   2 -18   0   10.88    5.10
  -2  18   0    7.81    5.76
   2  18   0   15.93    6.01
  -3 -18   0  164.42   14.04
  -3  18   0  125.48   11.85
   3  18   0  174.54   13.35
  -4 -18   0   40.52    8.25
  -4  18   0   45.19   10.09
  -4  18   0   51.71    8.34
  -5 -18   0    9.32    5.86
  -5  18   0    0.12    4.42
  -5  18   0    6.22    5.80
  -5  18   0   11.52    6.53
  -5  18   0    6.31    5.68
  -6 -18   0   14.04    6.86
  -6  18   0   10.98    5.72
  -6  18   0   14.02    7.06
  -6  18   0    3.83    5.78
  -6  18   0   11.39    6.20
  -7 -18   0   28.49    7.65
  -7 -18   0   48.34    9.76
  -7  18   0   20.86    7.58
  -7  18   0   35.67    8.38
  -7  18   0   39.08    9.00
  -7  18   0   32.31    7.61
   0 -19   0    0.19    4.99
   0  19   0   -4.38    4.60
   1 -19   0    7.50    5.45
  -1 -19   0    8.86    5.19
   1  19   0   13.73    6.11
  -1  19   0    9.21    5.81
  -2 -19   0    1.05    4.76
  -2  19   0    2.01    5.51
   2  19   0    7.32    5.35
  -3 -19   0    8.37    5.98
  -3  19   0    9.42    6.10
  -4 -19   0    0.81    5.92
  -4  19   0   -0.91    5.77
  -5 -19   0   13.11    7.17
  -5  19   0    9.03    6.81
  -5  19   0   19.52    7.66
  -6 -19   0   -5.14    6.35
  -6  19   0    3.59    6.19
  -6  19   0    1.09    5.14
  -6  19   0    6.23    6.29
  -6  19   0    3.19    6.51
   0 -20   0   32.04    8.03
   0  20   0   13.54    6.88
   1 -20   0   56.36    9.63
  -1 -20   0   38.89    8.44
   1  20   0   37.12    8.65
  -1  20   0   36.45    8.57
  -2 -20   0    9.95    6.57
   2  20   0   12.83    6.48
  -2  20   0    5.86    6.42
  -3 -20   0   68.40   10.42
  -3  20   0   36.30    8.34
  -4 -20   0   24.94    7.74
  -4  20   0   17.93    7.64
  -5 -20   0   -4.85    6.15
  -5  20   0   -7.03    6.15
   0 -21   0   -6.00    5.29
   0  21   0   -4.24    4.89
  -1 -21   0   28.41    8.14
   1  21   0   25.27    7.29
  -1  21   0   18.73    7.19
  -2 -21   0   17.24    7.89
  -2  21   0   -0.75    6.08
  -3 -21   0   24.41    8.14
  -3  21   0   15.81    7.55
 -13   0   1   -1.28    3.19
 -13   0   1   -1.65    4.36
 -13   0   1    0.04    3.15
 -12   0   1   -2.38    2.41
 -12   0   1   -1.57    3.89
 -11   0   1    1.76    2.60
 -11   0   1   -1.85    2.22
 -11   0   1    1.90    3.93
 -10   0   1    1.59    3.16
 -10   0   1   -1.19    1.92
 -10   0   1   -0.51    1.94
 -10   0   1   -2.28    1.98
  -9   0   1   -0.94    2.62
  -9   0   1   -0.46    1.89
  -9   0   1   -1.73    1.65
  -9   0   1   -1.03    1.61
  -9   0   1    1.39    3.17
  -8   0   1    0.66    2.40
  -8   0   1    0.60    1.51
  -8   0   1    1.66    2.91
  -7   0   1    0.00    2.11
  -7   0   1    0.33    2.29
  -6   0   1   -0.76    1.96
  -6   0   1   -2.04    1.80
  -5   0   1   -1.51    1.63
  -5   0   1    2.78    2.07
  -4   0   1    0.34    1.59
  -4   0   1    0.98    1.82
  -3   0   1   -1.43    1.50
  -3   0   1   -1.18    1.53
  -2   0   1   -0.20    1.21
  -2   0   1   -0.34    1.13
  -1   0   1   -0.83    0.76
  -1   0   1    2.10    0.73
   0   0   1   -1.02    0.41
   0   0  -1   -1.60    0.35
   0   0  -1   -1.73    0.38
   1   0   1    0.67    0.70
  -1   0  -1   -0.33    0.72
  -1   0  -1   -1.43    0.81
  -1   0  -1   -0.59    0.67
  -2   0  -1    0.08    1.01
  -2   0  -1    1.61    1.02
   2   0   1    0.69    0.98
  -2   0  -1    0.77    0.94
  -2   0  -1   -0.07    1.12
  -2   0  -1    0.06    0.96
  -2   0  -1    1.60    1.46
  -3   0  -1   -0.45    1.03
  -3   0  -1   -0.58    1.03
  -3   0  -1    0.84    1.13
  -3   0  -1    1.60    1.70
  -3   0  -1   -0.14    1.16
  -3   0  -1    0.13    1.28
   3   0   1   -1.34    0.90
  -4   0  -1   -1.87    1.22
  -4   0  -1    1.01    1.25
  -4   0  -1   -0.53    1.13
  -4   0  -1   -0.95    1.79
  -4   0  -1    0.00    1.29
  -4   0  -1   -0.87    1.24
  -5   0  -1   -0.62    1.31
  -5   0  -1    0.61    1.53
  -5   0  -1   -1.28    1.15
  -5   0  -1    3.48    2.14
  -5   0  -1    0.06    1.37
  -5   0  -1    1.66    1.33
  -6   0  -1   -0.67    1.32
  -6   0  -1   -0.10    1.36
  -6   0  -1   -0.83    1.43
  -6   0  -1    0.15    1.74
  -6   0  -1    0.37    2.28
  -6   0  -1    1.04    1.58
  -7   0  -1    0.28    1.59
  -7   0  -1    1.21    2.49
  -7   0  -1    0.64    1.67
  -7   0  -1   -1.35    1.50
  -7   0  -1   -0.05    1.56
  -7   0  -1   -0.68    1.56
  -8   0  -1   -3.67    1.72
  -8   0  -1   -2.43    1.79
  -8   0  -1   -2.41    1.94
  -8   0  -1   -0.40    2.86
  -8   0  -1   -2.59    1.53
  -8   0  -1    0.12    1.92
  -9   0  -1   -0.92    2.18
  -9   0  -1   -3.20    1.99
  -9   0  -1   -2.78    2.95
  -9   0  -1    0.94    2.14
  -9   0  -1   -2.03    1.94
  -9   0  -1   -1.72    1.82
 -10   0  -1   -1.91    2.25
 -10   0  -1   -0.68    2.38
 -10   0  -1   -0.35    3.40
 -10   0  -1    1.63    2.54
 -10   0  -1    0.76    2.58
 -11   0  -1   -1.66    2.52
 -11   0  -1   -7.85    3.16
 -11   0  -1    3.37    2.80
 -11   0  -1    2.27    2.82
 -12   0  -1    2.38    3.34
 -12   0  -1   -2.85    4.17
 -12   0  -1    1.59    3.39
 -13   0  -1    2.40    3.66
 -13   0  -1    2.15    4.95
 -13   0  -1   -2.97    3.48
 -13  -1   1    1.29    2.90
 -13   1   1   -0.48    2.95
 -13   1   1    7.41    3.40
 -13   1   1   14.80    5.96
 -12  -1   1    2.57    3.00
 -12  -1   1    3.86    2.90
 -12  -1   1    4.83    4.36
 -12   1   1   -0.67    2.82
 -12   1   1    1.31    4.15
 -12   1   1    2.39    2.69
 -11  -1   1  104.88    9.66
 -11  -1   1  108.34    6.33
 -11  -1   1   93.22    6.00
 -11   1   1   98.25    9.94
 -11   1   1   99.82    5.98
 -11   1   1  105.87    6.27
 -10  -1   1   58.61    7.04
 -10  -1   1   48.47    4.35
 -10  -1   1   46.61    4.44
 -10  -1   1   52.87    4.71
 -10   1   1   51.03    7.07
 -10   1   1   51.99    4.56
 -10   1   1   41.51    4.01
 -10   1   1   53.56    4.57
  -9  -1   1   14.84    2.70
  -9  -1   1   10.83    3.60
  -9  -1   1   17.68    2.65
  -9  -1   1   18.50    2.78
  -9   1   1   13.60    3.88
  -9   1   1   19.09    2.93
  -9   1   1   18.02    4.55
  -9   1   1   16.80    2.65
  -8  -1   1  122.85    5.02
  -8  -1   1  134.28    7.64
  -8  -1   1  129.04    5.09
  -8  -1   1  134.98    7.70
  -8   1   1  115.82    6.84
  -8   1   1  128.02    4.97
  -8   1   1  118.03    7.63
  -7  -1   1  198.16    8.22
  -7  -1   1  180.85    8.15
  -7  -1   1  181.33    5.68
  -7   1   1  201.63    8.78
  -7   1   1  187.98    7.69
  -6  -1   1  306.84    9.66
  -6  -1   1  307.46    9.89
  -6  -1   1  297.57    7.05
  -6   1   1  291.17   10.01
  -6   1   1  295.81    9.24
  -5  -1   1   62.50    4.50
  -5  -1   1   65.21    4.29
  -5   1   1   63.14    4.65
  -5   1   1   62.32    3.99
  -4  -1   1    9.45    2.34
  -4  -1   1    6.71    2.05
  -4   1   1    7.51    2.06
  -4   1   1    7.06    2.22
  -3  -1   1   10.41    2.17
  -3  -1   1   16.95    2.22
  -3   1   1   13.36    2.04
  -3   1   1    9.36    2.06
  -2  -1   1    8.22    1.72
  -2  -1   1   11.39    1.51
  -2   1   1   11.67    1.58
  -2   1   1    9.92    1.76
  -1  -1   1  283.32    5.05
  -1  -1   1  290.86    5.75
  -1  -1   1  278.64    5.50
  -1  -1   1  289.15    6.14
  -1   1   1  284.04    6.03
  -1   1   1  287.75    5.59
  -1   1   1  284.91    5.27
  -1   1   1  288.31    5.83
  -1   1   1  287.06    5.38
  -1   1   1  279.61    5.31
   0  -1   1  888.83   16.04
   0  -1  -1  893.52   16.08
   0   1   1  905.80   16.06
   0   1  -1  935.40   16.13
   0   1  -1  913.20   15.21
  -1  -1  -1  221.18    5.08
  -1  -1  -1  214.84    5.04
  -1  -1  -1  213.34    5.18
   1  -1   1  210.62    4.88
   1   1   1  220.25    4.99
  -1   1  -1  213.92    5.13
  -1   1  -1  216.36    5.16
  -1   1  -1  214.70    5.08
  -2  -1  -1   26.02    1.99
  -2  -1  -1   30.25    2.28
  -2  -1  -1   35.24    2.52
   2  -1   1   33.11    2.02
  -2  -1  -1   30.58    2.36
  -2  -1  -1   32.54    2.58
  -2  -1  -1   32.19    2.35
   2   1   1   29.82    1.99
  -2   1  -1   29.58    2.14
  -2   1  -1   30.17    2.57
  -2   1  -1   31.15    2.18
  -2   1  -1   30.72    2.28
  -2   1  -1   33.29    2.46
  -2   1  -1   31.10    2.25
   3  -1   1  430.76    8.71
  -3  -1  -1  433.59   10.24
  -3  -1  -1  434.24    9.83
  -3  -1  -1  432.01    9.36
  -3  -1  -1  433.43    9.50
  -3  -1  -1  428.66    9.35
  -3  -1  -1  433.54    9.75
  -3   1  -1  439.71    9.72
  -3   1  -1  436.95    9.48
  -3   1  -1  434.52    9.27
  -3   1  -1  441.67    9.77
   3   1   1  433.74    8.89
  -3   1  -1  429.79   10.52
  -3   1  -1  441.86    9.32
  -4  -1  -1  242.75    6.35
  -4  -1  -1  239.52    6.81
  -4  -1  -1  222.67    6.39
  -4  -1  -1  218.34    6.22
  -4  -1  -1  244.28    7.69
  -4  -1  -1  237.63    6.64
  -4   1  -1  235.67    6.28
  -4   1  -1  230.07    6.43
  -4   1  -1  239.48    6.62
  -4   1  -1  235.44    6.68
  -4   1  -1  236.13    6.27
  -4   1  -1  224.47    7.81
  -5  -1  -1    1.33    1.47
  -5  -1  -1    0.83    1.43
  -5  -1  -1    0.32    1.40
  -5  -1  -1    0.93    2.08
  -5  -1  -1    0.45    1.34
  -5  -1  -1    0.24    1.33
  -5   1  -1   -0.73    1.30
  -5   1  -1    2.66    1.52
  -5   1  -1   -0.60    1.99
  -5   1  -1    0.16    1.36
  -5   1  -1    0.76    1.49
  -5   1  -1   -0.80    1.45
  -6  -1  -1   36.68    3.35
  -6  -1  -1   35.56    4.55
  -6  -1  -1   35.08    3.29
  -6  -1  -1   33.13    3.19
  -6  -1  -1   34.53    3.16
  -6  -1  -1   29.23    3.20
  -6   1  -1   31.99    3.36
  -6   1  -1   30.29    4.19
  -6   1  -1   30.58    3.07
  -6   1  -1   35.13    3.42
  -6   1  -1   34.96    3.14
  -6   1  -1   37.30    3.28
  -7  -1  -1   72.21    6.36
  -7  -1  -1   69.04    4.29
  -7  -1  -1   70.30    4.55
  -7  -1  -1   70.25    4.32
  -7  -1  -1   63.62    4.37
  -7  -1  -1   60.46    4.09
  -7   1  -1   68.36    4.57
  -7   1  -1   66.87    4.29
  -7   1  -1   63.73    4.22
  -7   1  -1   72.12    4.27
  -7   1  -1   71.95    6.80
  -7   1  -1   63.52    4.28
  -8  -1  -1  196.30    7.42
  -8  -1  -1  187.55    9.21
  -8  -1  -1  191.65    7.65
  -8  -1  -1  217.78    7.81
  -8  -1  -1  193.72    7.53
  -8  -1  -1  212.46    7.64
  -8   1  -1  197.88    7.29
  -8   1  -1  184.76    7.46
  -8   1  -1  193.10    7.38
  -8   1  -1  201.44    7.65
  -8   1  -1  196.28    7.50
  -8   1  -1  196.26    9.93
  -9  -1  -1    3.63    3.25
  -9  -1  -1   -1.05    1.77
  -9  -1  -1    0.76    2.19
  -9  -1  -1    2.17    2.42
  -9  -1  -1    0.24    2.28
  -9  -1  -1    3.45    2.19
  -9   1  -1    5.15    2.51
  -9   1  -1    2.20    2.26
  -9   1  -1    3.98    2.52
  -9   1  -1   -1.80    2.28
  -9   1  -1    4.32    3.85
  -9   1  -1   -0.59    1.91
 -10  -1  -1  108.36    9.50
 -10  -1  -1  105.70    6.60
 -10  -1  -1   94.34    6.48
 -10  -1  -1   91.91    6.45
 -10  -1  -1  105.44    6.65
 -10   1  -1  102.71    6.55
 -10   1  -1  106.23   10.11
 -10   1  -1   96.15    6.42
 -10   1  -1  102.83    6.35
 -10   1  -1  109.53    6.67
 -11  -1  -1   82.95    9.31
 -11  -1  -1   96.47    7.08
 -11  -1  -1   88.84    6.73
 -11  -1  -1   89.31    7.45
 -11   1  -1   93.17    9.93
 -11   1  -1  102.63    6.93
 -11   1  -1   90.23    6.91
 -11   1  -1   89.70    6.72
 -12  -1  -1   16.05    4.29
 -12  -1  -1   15.44    4.29
 -12  -1  -1   23.53    5.87
 -12   1  -1   16.51    4.28
 -12   1  -1   18.71    6.24
 -12   1  -1   22.30    4.66
 -13  -1  -1    6.01    4.17
 -13  -1  -1    3.15    4.89
 -13  -1  -1    3.95    3.97
 -13   1  -1    3.76    3.92
 -13   1  -1    5.73    3.90
 -13   1  -1   17.56    6.62
 -13  -2   1    5.50    3.54
 -13  -2   1    6.33    3.81
 -13   2   1    5.99    3.44
 -13   2   1   24.24    7.11
 -13   2   1   12.47    4.07
 -12  -2   1   22.18    5.74
 -12  -2   1   18.74    4.07
 -12  -2   1   22.38    4.14
 -12   2   1   18.42    5.50
 -12   2   1   21.78    3.88
 -12   2   1   23.87    4.23
 -11  -2   1    6.75    4.10
 -11  -2   1    0.69    2.65
 -11  -2   1    1.83    2.55
 -11   2   1    3.07    2.61
 -11   2   1   -0.52    4.12
 -11   2   1    4.22    2.51
 -10  -2   1    1.40    2.07
 -10  -2   1   -0.80    2.25
 -10  -2   1    1.40    2.80
 -10  -2   1    1.29    2.11
 -10   2   1    3.15    2.27
 -10   2   1   -0.16    2.01
 -10   2   1   -0.77    2.12
 -10   2   1   -3.27    3.04
  -9  -2   1  164.45    8.77
  -9  -2   1  158.04    6.40
  -9  -2   1  165.66    6.54
  -9  -2   1  152.82    6.30
  -9   2   1  156.56    6.11
  -9   2   1  151.92    6.12
  -9   2   1  153.54    7.89
  -9   2   1  166.12    6.25
  -9   2   1  138.86    9.07
  -8  -2   1   94.83    6.40
  -8  -2   1  103.35    7.18
  -8  -2   1   96.28    4.57
  -8  -2   1  105.78    4.97
  -8  -2   1   99.86    4.82
  -8   2   1   87.88    5.95
  -8   2   1  106.40    4.68
  -8   2   1  106.24    7.36
  -7  -2   1    0.05    1.36
  -7  -2   1    2.42    1.51
  -7  -2   1    0.77    2.49
  -7  -2   1    4.53    2.39
  -7  -2   1    1.05    1.44
  -7   2   1   -0.01    2.00
  -7   2   1    0.86    1.36
  -7   2   1   -0.95    2.51
  -6  -2   1   72.54    4.78
  -6  -2   1   75.80    3.43
  -6  -2   1   70.25    3.29
  -6  -2   1   69.56    3.41
  -6  -2   1   66.35    3.25
  -6  -2   1   68.54    3.61
  -6  -2   1   70.84    5.34
  -6   2   1   79.85    4.57
  -6   2   1   75.12    3.29
  -6   2   1   81.31    5.71
  -5  -2   1  166.04    5.07
  -5  -2   1  176.17    4.77
  -5  -2   1  175.60    5.23
  -5  -2   1  168.78    4.82
  -5  -2   1  181.92    6.35
  -5  -2   1  166.21    4.71
  -5  -2   1  172.79    7.05
  -5   2   1  172.04    7.12
  -5   2   1  163.81    4.51
  -5   2   1  167.09    6.08
  -4  -2   1  162.83    5.53
  -4  -2   1  178.05    6.55
  -4  -2   1  161.38    4.39
  -4  -2   1  161.77    4.73
  -4  -2   1  153.65    4.27
  -4  -2   1  157.66    4.77
  -4  -2   1  161.84    4.29
  -4   2   1  170.15    6.44
  -4   2   1  167.09    5.47
  -3  -2   1  438.87    9.14
  -3  -2   1  435.38    9.19
  -3  -2   1  438.59    8.68
  -3  -2   1  419.06    8.54
  -3  -2   1  427.63   10.42
  -3  -2   1  430.69    9.10
  -3  -2   1  418.79    8.52
  -3   2   1  426.78   10.37
  -3   2   1  434.21    8.42
  -3   2   1  425.54    9.26
  -2  -2   1  379.04    8.21
  -2  -2   1  393.76    9.08
  -2  -2   1  388.94    8.24
  -2  -2   1  391.21    7.89
  -2  -2   1  394.49    7.94
  -2  -2   1  389.19    7.55
  -2  -2   1  390.41    7.84
  -2   2   1  395.02    8.02
  -2   2   1  381.63    8.89
  -2   2   1  388.05    8.06
  -2   2   1  388.70    7.59
  -2   2   1  393.94    7.52
  -2   2   1  388.97    8.00
  -2   2   1  385.56    7.72
  -1  -2   1  415.75    8.48
  -1  -2   1  429.34    8.77
   1  -2  -1  416.69    8.29
  -1  -2   1  426.36    8.77
   1   2  -1  428.99    8.40
  -1   2   1  428.43    8.59
  -1   2   1  406.03    8.37
  -1   2   1  423.21    8.63
  -1   2   1  424.64    8.75
   1   2  -1  424.06    8.43
  -1   2   1  421.27    8.39
  -1   2   1  423.02    8.24
   0  -2   1   14.49    1.50
   0  -2   1   15.93    1.27
   0  -2   1   16.82    1.65
   0  -2  -1   14.39    1.47
   0   2   1   12.31    1.37
   0   2  -1   16.82    1.71
   0   2  -1   16.85    1.22
   0   2   1   16.60    1.72
  -1  -2  -1   14.02    1.57
  -1  -2  -1   22.33    1.89
   1  -2   1   22.47    1.82
  -1  -2  -1   17.75    1.82
  -1   2  -1   17.77    1.87
  -1   2  -1   19.96    2.04
   1   2   1   19.07    1.83
  -1   2  -1   18.08    1.91
  -2  -2  -1  886.44   17.06
  -2  -2  -1  893.32   17.48
   2  -2   1  897.73   16.65
  -2  -2  -1  876.15   17.05
  -2  -2  -1  881.47   16.83
  -2  -2  -1  925.24   17.15
   2   2   1  910.82   16.90
  -2   2  -1  915.33   17.43
  -2   2  -1  885.02   16.90
  -2   2  -1  893.92   16.87
  -2   2  -1  874.50   17.02
   3  -2   1  528.95   10.64
  -3  -2  -1  522.97   11.74
  -3  -2  -1  521.07   11.37
  -3  -2  -1  524.76   11.77
  -3  -2  -1  537.33   11.84
  -3  -2  -1  543.32   11.44
  -3  -2  -1  530.89   11.38
  -3   2  -1  542.04   12.47
   3   2   1  543.37   10.97
  -3   2  -1  549.62   11.23
  -3   2  -1  530.24   11.36
  -3   2  -1  524.30   11.18
  -3   2  -1  539.87   11.72
  -3   2  -1  536.83   11.65
  -4  -2  -1   63.05    3.47
  -4  -2  -1   55.36    3.46
  -4  -2  -1   60.63    3.62
  -4  -2  -1   64.75    3.45
  -4  -2  -1   58.53    3.43
  -4  -2  -1   59.10    4.12
  -4   2  -1   57.97    3.21
  -4   2  -1   56.53    3.11
  -4   2  -1   56.48    3.44
  -4   2  -1   57.43    3.19
  -4   2  -1   60.93    3.60
  -4   2  -1   60.12    4.81
   4   2   1   54.59    2.66
  -4   2  -1   57.13    3.46
  -5  -2  -1  372.53    9.78
  -5  -2  -1  377.51    9.67
  -5  -2  -1  384.39   10.84
  -5  -2  -1  374.88    9.54
  -5  -2  -1  392.44   10.12
  -5  -2  -1  370.63    9.44
  -5   2  -1  390.88    9.33
  -5   2  -1  371.13    9.27
  -5   2  -1  375.31    9.65
  -5   2  -1  377.27   11.51
  -5   2  -1  380.69    9.77
  -5   2  -1  399.15    9.72
  -6  -2  -1  624.90   14.71
  -6  -2  -1  613.90   14.45
  -6  -2  -1  638.12   14.17
  -6  -2  -1  628.75   15.82
  -6  -2  -1  627.19   14.31
  -6  -2  -1  603.04   14.12
  -6   2  -1  622.29   14.17
  -6   2  -1  621.35   16.57
  -6   2  -1  617.01   13.81
  -6   2  -1  625.78   14.38
  -6   2  -1  616.52   13.97
  -6   2  -1  618.36   14.40
  -7  -2  -1   19.87    3.81
  -7  -2  -1   32.21    3.53
  -7  -2  -1   30.83    3.50
  -7  -2  -1   32.62    3.52
  -7  -2  -1   27.47    3.38
  -7  -2  -1   28.14    3.34
  -7   2  -1   28.93    3.37
  -7   2  -1   29.20    3.57
  -7   2  -1   29.49    4.77
  -7   2  -1   23.51    3.03
  -7   2  -1   30.43    3.29
  -7   2  -1   31.21    3.49
  -8  -2  -1   29.99    3.68
  -8  -2  -1   28.72    3.57
  -8  -2  -1   27.76    3.66
  -8  -2  -1   31.60    3.79
  -8  -2  -1   29.68    3.86
  -8  -2  -1   34.16    5.13
  -8   2  -1   33.97    3.68
  -8   2  -1   31.59    3.67
  -8   2  -1   31.34    3.81
  -8   2  -1   29.95    5.48
  -8   2  -1   32.58    3.92
  -8   2  -1   34.43    4.02
  -9  -2  -1  102.25    5.96
  -9  -2  -1   95.02    5.73
  -9  -2  -1  103.46    6.27
  -9  -2  -1  111.24    6.28
  -9  -2  -1  101.86    8.65
  -9  -2  -1   97.50    6.09
  -9   2  -1   84.91    8.57
  -9   2  -1   95.12    5.64
  -9   2  -1   96.81    5.95
  -9   2  -1  102.55    6.07
  -9   2  -1   95.48    5.93
 -10  -2  -1  225.53    9.41
 -10  -2  -1  203.50    8.85
 -10  -2  -1  212.34    9.11
 -10  -2  -1  204.61   10.90
 -10  -2  -1  216.87    9.10
 -10   2  -1  224.08    9.04
 -10   2  -1  227.13   12.18
 -10   2  -1  196.82    8.71
 -10   2  -1  223.81    8.80
 -10   2  -1  214.47    8.86
 -11  -2  -1   -0.92    2.78
 -11  -2  -1   -1.79    2.79
 -11  -2  -1    7.10    4.40
 -11  -2  -1   -3.16    2.51
 -11  -2  -1   -1.77    2.54
 -11   2  -1   -2.05    4.15
 -11   2  -1   -0.61    2.77
 -11   2  -1    2.56    2.85
 -11   2  -1    2.12    2.74
 -12  -2  -1   26.34    6.36
 -12  -2  -1   30.17    5.08
 -12  -2  -1   30.50    5.18
 -12   2  -1   21.97    4.72
 -12   2  -1   20.85    4.60
 -12   2  -1   18.09    6.32
 -13  -2  -1   49.57    6.37
 -13  -2  -1   47.35    6.92
 -13   2  -1   29.49    5.36
 -13   2  -1   47.64    9.11
 -13   2  -1   37.43    5.73
 -13  -3   1    4.93    3.57
 -13  -3   1   -0.78    3.10
 -13   3   1    1.91    4.83
 -13   3   1    0.59    3.20
 -13   3   1    2.26    3.21
 -12  -3   1   -0.46    2.72
 -12  -3   1    0.32    2.85
 -12   3   1   -2.33    2.88
 -12   3   1   -3.76    4.75
 -12   3   1    0.11    2.67
 -11  -3   1    4.58    2.83
 -11  -3   1    4.29    2.94
 -11  -3   1    1.78    3.66
 -11   3   1    8.61    3.11
 -11   3   1    6.63    3.02
 -11   3   1    4.22    4.43
 -10  -3   1   38.08    4.46
 -10  -3   1   33.60    4.20
 -10  -3   1   33.32    4.11
 -10  -3   1   27.07    5.13
 -10   3   1   35.41    6.66
 -10   3   1   31.53    3.94
 -10   3   1   36.78    4.14
 -10   3   1   36.63    4.06
  -9  -3   1    7.54    2.57
  -9  -3   1   12.89    3.71
  -9  -3   1    7.45    2.52
  -9  -3   1    8.71    2.54
  -9   3   1    5.09    2.18
  -9   3   1    1.99    3.45
  -9   3   1    3.66    2.85
  -9   3   1    3.67    2.19
  -9   3   1    5.17    2.28
  -8  -3   1   46.22    3.98
  -8  -3   1   51.13    4.15
  -8  -3   1   51.14    3.96
  -8  -3   1   40.56    3.90
  -8  -3   1   53.06    5.54
  -8   3   1   50.88    6.51
  -8   3   1   51.99    3.81
  -8   3   1   55.77    3.84
  -8   3   1   56.20    5.47
  -8   3   1   49.56    4.02
  -7  -3   1    4.92    2.68
  -7  -3   1    4.71    1.84
  -7  -3   1    4.24    1.70
  -7  -3   1    5.21    2.07
  -7  -3   1    6.37    1.85
  -7  -3   1    8.62    2.72
  -7  -3   1    5.74    1.87
  -7   3   1    4.75    1.67
  -7   3   1    5.72    1.87
  -7   3   1    4.83    2.34
  -7   3   1    4.75    1.66
  -7   3   1    6.79    3.16
  -6  -3   1  100.20    4.25
  -6  -3   1  110.05    6.32
  -6  -3   1  102.67    4.28
  -6  -3   1  109.63    5.40
  -6  -3   1   98.86    4.62
  -6  -3   1  106.05    4.29
  -6  -3   1   98.96    4.38
  -6   3   1   92.87    6.17
  -6   3   1   99.04    3.90
  -6   3   1   99.47    3.87
  -6   3   1  108.03    4.17
  -6   3   1  107.91    5.02
  -5  -3   1  248.23    8.76
  -5  -3   1  241.39    6.51
  -5  -3   1  244.27    6.54
  -5  -3   1  242.07    6.84
  -5  -3   1  238.07    6.89
  -5  -3   1  242.78    7.39
  -5  -3   1  221.32    6.33
  -5   3   1  234.58    5.97
  -5   3   1  242.09    6.35
  -5   3   1  231.25    6.43
  -5   3   1  247.16    6.53
  -5   3   1  223.42    8.50
  -5   3   1  242.33    7.08
  -5   3   1  234.08    6.02
  -4  -3   1    6.52    1.84
  -4  -3   1    7.40    1.55
  -4  -3   1    6.62    1.42
  -4  -3   1    7.01    2.47
  -4  -3   1    5.17    1.70
  -4  -3   1    6.98    1.51
  -4  -3   1    9.11    1.74
  -4   3   1    7.77    1.66
  -4   3   1    6.89    1.38
  -4   3   1    4.60    1.52
  -4   3   1    7.47    2.38
  -4   3   1    6.87    1.54
  -4   3   1    6.63    1.80
  -4   3   1    7.69    1.33
  -3  -3   1  351.03    8.35
  -3  -3   1  350.08    8.33
  -3  -3   1  346.83    7.93
  -3  -3   1  351.32    9.45
  -3  -3   1  348.86    8.01
  -3  -3   1  347.80    7.68
  -3  -3   1  353.92    8.03
  -3   3   1  349.32    7.82
  -3   3   1  353.11    7.66
  -3   3   1  343.21    7.84
  -3   3   1  359.00    7.58
  -3   3   1  343.92    9.30
  -3   3   1  351.49    8.06
   3   3  -1  340.82    7.46
  -3   3   1  341.99    8.02
  -2  -3   1   45.95    3.39
  -2  -3   1   46.43    2.04
  -2  -3   1   43.24    2.77
   2  -3  -1   42.31    2.38
  -2  -3   1   44.35    2.83
  -2  -3   1   42.61    2.60
  -2  -3   1   45.90    2.87
  -2  -3   1   51.36    2.74
  -2   3   1   46.95    3.41
  -2   3   1   46.79    2.78
  -2   3   1   41.79    2.53
   2   3  -1   42.40    2.60
  -2   3   1   45.66    2.63
  -2   3   1   43.41    2.56
  -2   3   1   45.75    2.76
  -2   3   1   42.05    2.69
  -1  -3   1   71.09    3.27
   1  -3  -1   68.85    3.05
  -1  -3   1   70.72    3.31
  -1  -3   1   73.38    3.25
  -1   3   1   63.79    3.32
  -1   3   1   68.27    3.22
   1   3  -1   76.78    3.27
  -1   3   1   65.03    3.08
  -1   3   1   72.78    3.28
   1   3  -1   68.65    3.16
   0  -3   1    0.17    1.03
   0  -3  -1    0.90    1.25
   0  -3   1    1.34    1.22
   0  -3   1    2.51    1.41
   0   3   1    2.58    1.47
   0   3  -1    0.15    1.27
   0   3  -1    1.30    1.05
   0   3  -1    0.90    1.22
   0   3   1    1.37    1.18
  -1  -3  -1   12.46    1.93
   1  -3   1   13.46    1.97
  -1  -3  -1    9.91    1.73
  -1   3  -1   11.78    2.00
  -1   3  -1   10.88    2.14
   1   3   1   12.01    1.88
  -1   3  -1   12.38    1.88
  -2  -3  -1  312.41    7.64
   2  -3   1  320.92    7.62
  -2  -3  -1  324.90    8.01
  -2  -3  -1  326.45    7.96
  -2  -3  -1  317.08    8.19
  -2  -3  -1  321.11    7.99
   2   3   1  325.60    7.88
  -2   3  -1  316.67    7.83
  -2   3  -1  323.84    7.82
  -2   3  -1  308.86    7.95
  -2   3  -1  309.09    8.06
  -2   3  -1  320.20    8.31
  -3  -3  -1 1086.58   20.73
  -3  -3  -1 1071.80   20.70
  -3  -3  -1 1042.91   20.61
   3  -3   1 1071.84   19.84
  -3  -3  -1 1080.20   20.46
  -3  -3  -1 1018.02   21.04
  -3  -3  -1 1066.92   21.23
  -3   3  -1 1039.68   20.52
  -3   3  -1 1075.55   20.40
  -3   3  -1 1082.95   21.42
  -3   3  -1 1059.60   20.96
  -3   3  -1 1016.87   20.37
  -3   3  -1 1053.79   20.98
   3   3   1 1056.46   20.17
  -4  -3  -1   30.68    3.30
  -4  -3  -1   31.99    3.09
   4  -3   1   35.44    2.27
  -4  -3  -1   35.56    3.21
  -4  -3  -1   33.99    3.31
  -4  -3  -1   31.88    2.99
  -4  -3  -1   29.27    3.01
  -4   3  -1   24.57    3.52
  -4   3  -1   35.19    2.94
   4   3   1   34.29    2.73
  -4   3  -1   32.09    2.89
  -4   3  -1   34.67    3.16
  -4   3  -1   31.10    3.11
  -4   3  -1   30.77    3.03
  -5  -3  -1  211.56    7.03
  -5  -3  -1  220.95    7.27
  -5  -3  -1  209.79    6.98
  -5  -3  -1  221.98    7.82
  -5  -3  -1  208.66    6.86
  -5  -3  -1  217.22    6.95
  -5   3  -1  217.50    6.11
  -5   3  -1  214.23    6.96
  -5   3  -1  216.25    6.95
  -5   3  -1  222.15    8.66
  -5   3  -1  214.00    7.04
  -5   3  -1  221.50    6.78
  -5   3  -1  224.78    6.70
  -6  -3  -1    1.23    1.76
  -6  -3  -1    0.10    1.51
  -6  -3  -1    0.93    1.47
  -6  -3  -1   -0.91    1.72
  -6  -3  -1    0.84    2.03
  -6  -3  -1    0.31    1.68
  -6   3  -1   -3.35    2.19
  -6   3  -1   -0.54    1.39
  -6   3  -1    0.94    1.71
  -6   3  -1    2.60    1.68
  -6   3  -1   -1.51    1.53
  -6   3  -1    1.06    1.85
  -7  -3  -1  144.89    6.43
  -7  -3  -1  145.56    6.60
  -7  -3  -1  140.53    6.20
  -7  -3  -1  154.89    7.57
  -7  -3  -1  147.40    6.31
  -7  -3  -1  142.58    6.25
  -7   3  -1  140.54    6.08
  -7   3  -1  147.06    6.27
  -7   3  -1  140.55    6.31
  -7   3  -1  144.88    6.41
  -7   3  -1  140.04    6.04
  -7   3  -1  145.31    8.37
  -8  -3  -1   -0.98    2.13
  -8  -3  -1   -0.44    1.88
  -8  -3  -1    1.95    2.11
  -8  -3  -1   -2.07    1.91
  -8  -3  -1    1.86    1.88
  -8  -3  -1    2.08    2.77
  -8   3  -1   -1.20    1.75
  -8   3  -1    0.36    2.09
  -8   3  -1   -1.87    1.81
  -8   3  -1    1.72    3.06
  -8   3  -1    1.65    2.19
  -8   3  -1    1.06    2.07
  -9  -3  -1   12.45    3.36
  -9  -3  -1   12.38    3.84
  -9  -3  -1    6.92    2.71
  -9  -3  -1    2.86    2.58
  -9  -3  -1    9.04    2.85
  -9   3  -1    4.42    2.47
  -9   3  -1    7.30    2.87
  -9   3  -1   14.16    3.22
  -9   3  -1    6.78    2.68
  -9   3  -1    6.32    4.18
  -9   3  -1    8.64    2.73
 -10  -3  -1    0.24    2.36
 -10  -3  -1   -1.38    2.49
 -10  -3  -1    2.47    3.11
 -10  -3  -1   -4.78    2.40
 -10  -3  -1    0.38    2.62
 -10   3  -1    5.06    2.67
 -10   3  -1   -3.41    3.53
 -10   3  -1    2.37    2.70
 -10   3  -1    4.32    2.87
 -10   3  -1    1.62    2.74
 -11  -3  -1    0.16    3.48
 -11  -3  -1   -1.06    2.87
 -11  -3  -1    4.96    3.06
 -11  -3  -1    1.36    2.96
 -11  -3  -1    0.50    2.88
 -11   3  -1    1.54    2.96
 -11   3  -1   -2.45    4.24
 -11   3  -1   -4.40    2.40
 -11   3  -1   -1.42    2.80
 -12  -3  -1   -0.94    3.14
 -12  -3  -1   -1.27    2.98
 -12  -3  -1    5.45    4.46
 -12   3  -1   -3.28    4.24
 -12   3  -1    0.30    3.21
 -12   3  -1   -1.70    3.14
 -13   3  -1    1.52    5.57
 -13   3  -1    8.21    4.24
 -13  -4   1   35.07    5.86
 -13  -4   1   42.92    5.81
 -13   4   1   38.18    5.32
 -13   4   1   26.47    4.76
 -13   4   1   25.53    7.94
 -12  -4   1   68.54    6.60
 -12  -4   1   66.97    6.57
 -12   4   1   76.44    6.60
 -12   4   1   59.53    9.64
 -12   4   1   81.99    6.65
 -11  -4   1   22.07    4.01
 -11  -4   1   20.51    4.03
 -11   4   1   20.53    3.72
 -11   4   1   18.54    3.72
 -11   4   1   17.16    5.90
 -10  -4   1    1.16    2.49
 -10  -4   1   -2.78    2.20
 -10  -4   1   -1.57    2.78
 -10  -4   1   -0.36    2.21
 -10   4   1   -3.47    2.18
 -10   4   1   -0.05    2.36
 -10   4   1    3.81    4.13
 -10   4   1   -1.34    2.19
  -9  -4   1   24.86    3.52
  -9  -4   1   28.55    4.57
  -9  -4   1   28.67    3.85
  -9  -4   1   22.67    3.58
  -9  -4   1   19.78    3.32
  -9  -4   1   24.09    3.50
  -9   4   1   18.89    3.24
  -9   4   1   16.63    2.95
  -9   4   1   17.66    4.75
  -9   4   1   27.70    3.53
  -8  -4   1    1.45    2.48
  -8  -4   1    7.84    2.46
  -8  -4   1    7.87    2.47
  -8  -4   1    7.35    2.20
  -8  -4   1    3.32    2.09
  -8  -4   1    4.40    2.18
  -8   4   1    2.95    3.46
  -8   4   1    7.06    2.29
  -8   4   1    4.49    2.21
  -8   4   1    6.72    2.66
  -8   4   1    3.02    1.97
  -7  -4   1   62.93    4.17
  -7  -4   1   78.08    4.73
  -7  -4   1   67.44    4.22
  -7  -4   1   70.54    4.32
  -7  -4   1   71.95    4.33
  -7  -4   1   63.50    5.43
  -7   4   1   71.21    4.03
  -7   4   1   73.52    4.15
  -7   4   1   62.06    4.02
  -7   4   1   66.76    6.64
  -7   4   1   72.56    4.17
  -7   4   1   67.42    4.08
  -7   4   1   63.85    4.50
  -6  -4   1  142.76    6.04
  -6  -4   1  149.19    7.58
  -6  -4   1  146.39    5.96
  -6  -4   1  144.05    5.57
  -6  -4   1  143.08    5.66
  -6  -4   1  151.07    5.64
  -6  -4   1  147.23    5.56
  -6   4   1  144.73    5.21
  -6   4   1  146.78    5.20
  -6   4   1  153.31    5.50
  -6   4   1  150.49    7.71
  -6   4   1  150.82    5.78
  -6   4   1  144.31    5.45
  -6   4   1  151.18    5.47
  -5  -4   1   26.19    3.85
  -5  -4   1   24.05    2.68
  -5  -4   1   20.18    2.45
  -5  -4   1   25.99    2.95
  -5  -4   1   25.62    2.95
  -5  -4   1   25.03    2.65
  -5  -4   1   24.13    2.64
  -5   4   1   22.06    2.41
  -5   4   1   23.93    2.64
  -5   4   1   23.74    2.47
  -5   4   1   21.56    3.55
  -5   4   1   22.75    2.59
  -5   4   1   26.60    2.68
  -5   4   1   21.94    2.42
  -4  -4   1  174.96    5.63
  -4  -4   1  172.13    5.65
  -4  -4   1  167.22    6.94
  -4  -4   1  170.99    5.37
  -4  -4   1  175.98    5.85
  -4  -4   1  163.58    5.84
  -4  -4   1  177.19    5.65
  -4   4   1  172.53    5.55
  -4   4   1  168.26    5.56
  -4   4   1  175.54    5.28
  -4   4   1  181.85    5.36
  -4   4   1  176.58    5.65
  -4   4   1  168.22    5.28
  -4   4   1  177.26    7.12
  -3  -4   1    3.82    1.41
  -3  -4   1    1.88    1.89
   3  -4  -1    1.95    1.17
  -3  -4   1   -0.50    1.30
  -3  -4   1    2.31    1.40
  -3  -4   1    0.52    1.40
  -3  -4   1    1.28    1.19
  -3  -4   1    1.40    1.43
  -3   4   1    0.76    1.46
  -3   4   1    2.51    1.97
  -3   4   1    0.17    1.33
  -3   4   1    2.71    1.42
  -3   4   1    1.46    1.34
   3   4  -1    1.17    1.33
  -3   4   1    1.34    1.26
  -3   4   1    1.93    1.52
  -2  -4   1 2189.66   39.54
  -2  -4   1 2147.97   38.62
  -2  -4   1 2211.87   38.88
   2  -4  -1 2167.99   38.05
  -2  -4   1 2166.63   38.63
  -2  -4   1 2153.72   35.95
  -2  -4   1 2108.50   38.33
  -2   4   1 2105.36   38.46
  -2   4   1 2106.52   38.44
  -2   4   1 2186.71   38.43
  -2   4   1 2168.29   39.23
  -2   4   1 2143.22   36.67
  -2   4   1 2205.06   38.48
  -2   4   1 2113.22   39.36
   2   4  -1 2217.84   38.49
  -1  -4   1  479.88   10.44
  -1  -4   1  485.31   11.04
   1  -4  -1  466.97   10.41
  -1  -4   1  476.53   10.61
   1   4  -1  467.22   10.58
  -1   4   1  459.80   10.54
   1   4  -1  464.94   10.58
  -1   4   1  452.54   10.54
  -1   4   1  486.66   10.95
  -1   4   1  463.90   10.50
   0  -4   1   15.12    2.16
   0  -4  -1   12.01    1.88
   0  -4   1   20.44    2.53
   0  -4  -1   15.32    2.16
   0   4  -1   13.29    2.20
   0   4  -1   12.67    1.89
   0   4  -1   16.32    1.94
   0   4   1   18.11    2.61
   0   4   1   12.87    2.13
  -1  -4  -1  211.88    6.45
  -1  -4  -1  225.43    6.74
   1  -4   1  228.98    6.48
  -1   4  -1  213.54    6.58
   1   4   1  218.68    6.53
  -1   4  -1  216.50    6.23
   2  -4   1   17.74    2.19
  -2  -4  -1   17.94    2.45
  -2  -4  -1   18.51    2.45
  -2  -4  -1   25.39    3.01
  -2  -4  -1   18.36    2.54
  -2  -4  -1   17.14    2.23
   2   4   1   21.03    2.55
  -2   4  -1   11.08    2.32
  -2   4  -1   16.23    2.57
  -2   4  -1   19.82    2.60
  -2   4  -1   16.38    2.22
  -3  -4  -1    7.80    2.02
  -3  -4  -1    7.06    1.98
  -3  -4  -1   11.76    2.03
   3  -4   1   10.73    1.86
  -3  -4  -1   11.63    2.16
  -3  -4  -1    6.60    1.99
  -3   4  -1    8.75    2.12
  -3   4  -1    7.70    2.39
  -3   4  -1   10.10    2.20
  -3   4  -1    7.07    2.09
  -3   4  -1   12.36    2.19
  -3   4  -1   10.07    2.19
   3   4   1    9.99    2.08
  -4  -4  -1  166.88    6.08
  -4  -4  -1  160.58    6.07
  -4  -4  -1  162.81    6.12
  -4  -4  -1  164.97    6.14
  -4  -4  -1  169.88    6.14
  -4  -4  -1  163.42    6.37
   4  -4   1  167.99    5.10
  -4   4  -1  169.23    5.92
   4   4   1  169.47    5.56
  -4   4  -1  181.75    7.44
  -4   4  -1  164.12    5.95
  -4   4  -1  172.35    6.26
  -4   4  -1  167.89    6.13
  -4   4  -1  177.13    6.32
  -5  -4  -1  162.97    6.54
  -5  -4  -1  153.49    6.06
  -5  -4  -1  145.93    6.28
  -5  -4  -1  156.60    6.17
  -5  -4  -1  148.72    6.06
  -5  -4  -1  155.52    6.07
  -5   4  -1  149.45    6.05
  -5   4  -1  150.17    5.74
  -5   4  -1  145.60    5.81
  -5   4  -1  155.89    6.16
   5   4   1  147.42    5.01
  -5   4  -1  157.96    6.05
  -5   4  -1  146.55    7.41
  -6  -4  -1  260.17    8.39
  -6  -4  -1  258.19    9.05
  -6  -4  -1  257.06    8.76
  -6  -4  -1  250.98    8.46
  -6  -4  -1  274.46    8.57
  -6  -4  -1  259.16    8.56
  -6   4  -1  257.90    8.22
  -6   4  -1  241.03    8.30
  -6   4  -1  261.01    8.12
  -6   4  -1  248.43    8.30
  -6   4  -1  257.15   10.35
  -6   4  -1  257.09    8.34
  -7  -4  -1  132.02    6.46
  -7  -4  -1  131.82    6.63
  -7  -4  -1  124.32    6.09
  -7  -4  -1  143.37    7.26
  -7  -4  -1  123.15    6.05
  -7  -4  -1  120.93    6.08
  -7   4  -1  130.70    8.25
  -7   4  -1  136.21    6.38
  -7   4  -1  130.62    6.36
  -7   4  -1  128.11    6.08
  -7   4  -1  128.72    6.09
  -7   4  -1  131.45    6.11
  -8  -4  -1    5.29    2.44
  -8  -4  -1    6.82    2.94
  -8  -4  -1    4.29    2.24
  -8  -4  -1    2.92    2.46
  -8  -4  -1    2.69    2.11
  -8  -4  -1    4.99    2.68
  -8   4  -1    3.88    2.20
  -8   4  -1    0.61    2.29
  -8   4  -1    2.61    2.60
  -8   4  -1    5.91    3.70
  -8   4  -1    2.36    2.52
  -8   4  -1    4.10    2.47
  -9  -4  -1   14.45    3.25
  -9  -4  -1   11.86    3.34
  -9  -4  -1   11.94    3.34
  -9  -4  -1   16.71    4.21
  -9  -4  -1   12.20    3.43
  -9   4  -1   12.73    4.80
  -9   4  -1   13.51    3.28
  -9   4  -1   13.55    3.29
  -9   4  -1   12.40    3.11
  -9   4  -1   14.34    3.37
 -10  -4  -1    5.06    2.85
 -10  -4  -1    7.56    3.12
 -10  -4  -1    3.79    2.89
 -10  -4  -1   11.01    3.76
 -10  -4  -1    7.67    3.97
 -10   4  -1    5.07    3.01
 -10   4  -1    7.75    3.21
 -10   4  -1    9.92    3.17
 -10   4  -1    5.99    4.48
 -10   4  -1    7.90    3.01
 -11  -4  -1    5.64    3.78
 -11  -4  -1    8.55    3.59
 -11  -4  -1    7.40    3.49
 -11  -4  -1   -2.09    3.04
 -11  -4  -1   10.20    3.59
 -11   4  -1   11.53    4.00
 -11   4  -1    8.11    5.38
 -11   4  -1    5.49    3.31
 -11   4  -1    7.72    3.35
 -12  -4  -1   27.07    5.26
 -12  -4  -1   36.96    5.93
 -12  -4  -1   33.69    5.32
 -12  -4  -1   38.06    5.56
 -12   4  -1   34.61    5.38
 -12   4  -1   24.55    7.30
 -12   4  -1   39.41    5.81
 -12  -5   1    2.25    3.33
 -12  -5   1    2.57    3.15
 -12   5   1   -2.12    5.27
 -12   5   1   -2.67    2.89
 -12   5   1    1.89    3.27
 -11  -5   1  144.82    7.90
 -11  -5   1  126.89    7.97
 -11  -5   1  123.01    7.64
 -11   5   1  149.04    7.77
 -11   5   1  121.91    7.40
 -11   5   1  139.27   12.71
 -10  -5   1   21.70    3.85
 -10  -5   1   10.08    3.25
 -10  -5   1   15.50    3.51
 -10  -5   1   15.22    3.49
 -10   5   1   22.63    3.77
 -10   5   1   13.56    3.31
 -10   5   1   15.21    3.48
 -10   5   1   16.07    5.51
  -9  -5   1    5.44    2.67
  -9  -5   1    3.89    2.33
  -9  -5   1    0.63    2.47
  -9  -5   1   -0.19    2.09
  -9  -5   1    3.50    2.60
  -9   5   1    2.49    2.44
  -9   5   1    0.66    3.17
  -9   5   1    0.16    2.24
  -9   5   1    2.80    2.33
  -8  -5   1   19.76    3.48
  -8  -5   1   28.98    3.89
  -8  -5   1   25.40    4.02
  -8  -5   1   23.80    3.51
  -8  -5   1   32.21    3.98
  -8  -5   1   28.26    3.62
  -8   5   1   25.14    3.33
  -8   5   1   26.53    3.60
  -8   5   1   29.33    3.86
  -8   5   1   34.60    3.63
  -8   5   1   21.46    4.87
  -8   5   1   32.68    3.60
  -8   5   1   20.99    3.33
  -7  -5   1  247.62    8.31
  -7  -5   1  239.70    8.54
  -7  -5   1  259.80    8.74
  -7  -5   1  246.08    8.38
  -7  -5   1  245.55    8.18
  -7  -5   1  257.94    8.48
  -7   5   1  241.92    7.91
  -7   5   1  253.33    8.10
  -7   5   1  235.43    7.76
  -7   5   1  234.57   10.58
  -7   5   1  252.20    7.97
  -7   5   1  238.26    8.00
  -7   5   1  255.81    7.91
  -6  -5   1   69.81    4.68
  -6  -5   1   66.04    4.29
  -6  -5   1   73.27    4.31
  -6  -5   1   66.75    4.34
  -6  -5   1   68.45    4.28
  -6  -5   1   69.41    4.28
  -6   5   1   59.33    3.98
  -6   5   1   68.66    3.90
  -6   5   1   61.32    5.98
  -6   5   1   74.67    4.39
  -6   5   1   65.73    4.15
  -6   5   1   69.87    4.05
  -6   5   1   66.95    4.08
  -5  -5   1    4.58    1.69
  -5  -5   1    4.85    1.70
  -5  -5   1    0.61    1.58
  -5  -5   1    4.06    1.80
  -5  -5   1    8.05    2.17
  -5  -5   1    1.39    1.37
  -5   5   1    2.89    1.56
  -5   5   1    5.47    1.77
  -5   5   1    1.59    2.52
  -5   5   1    4.91    1.77
  -5   5   1    0.61    1.55
  -5   5   1    1.78    1.79
  -5   5   1    3.64    1.70
  -4  -5   1  361.94   11.03
  -4  -5   1  365.07   10.03
  -4  -5   1  354.48    8.55
  -4  -5   1  357.43    9.54
  -4  -5   1  354.05    9.51
  -4  -5   1  357.91    9.84
  -4  -5   1  361.61    9.55
  -4   5   1  362.79    9.26
  -4   5   1  371.59    9.70
  -4   5   1  384.41    9.34
  -4   5   1  356.42   10.88
  -4   5   1  371.00    9.69
  -4   5   1  374.59    9.51
  -4   5   1  366.02    8.48
   4   5  -1  370.33    8.79
  -3  -5   1  172.20    5.96
   3  -5  -1  175.32    5.32
  -3  -5   1  163.28    6.04
  -3  -5   1  156.57    5.81
  -3  -5   1  165.35    5.84
  -3  -5   1  162.40    6.01
  -3  -5   1  169.01    4.72
  -3   5   1  161.04    5.82
  -3   5   1  173.22    6.78
  -3   5   1  163.71    4.93
   3   5  -1  177.66    5.76
  -3   5   1  167.80    5.71
  -3   5   1  156.14    5.82
  -3   5   1  164.11    5.70
  -3   5   1  171.85    6.00
   2  -5  -1    9.86    1.88
  -2  -5   1    6.18    1.85
  -2  -5   1   10.24    2.03
  -2  -5   1    8.74    1.99
  -2  -5   1    7.62    2.22
  -2  -5   1   10.03    1.42
  -2   5   1    9.33    2.06
  -2   5   1   12.27    2.25
  -2   5   1    7.23    2.13
  -2   5   1    8.32    1.88
   2   5  -1   10.15    2.14
  -2   5   1   11.09    1.93
  -2   5   1   10.09    2.43
   1  -5  -1  247.06    7.07
  -1  -5   1  233.71    7.18
  -1  -5   1  240.15    7.47
  -1   5   1  223.49    7.06
   1   5  -1  248.52    7.27
  -1   5   1  238.72    7.22
   1   5  -1  235.02    7.20
  -1   5   1  241.91    7.12
  -1   5   1  238.48    7.41
   0  -5  -1   47.85    3.75
   0  -5   1   44.93    3.50
   0  -5   1   48.98    3.90
   0  -5  -1   44.38    3.44
   0   5  -1   41.92    2.89
   0   5   1   42.41    3.81
   0   5  -1   46.76    3.86
   0   5   1   35.31    3.13
   1  -5   1  226.63    6.86
  -1  -5  -1  216.13    6.93
  -1  -5  -1  215.81    7.13
  -1   5  -1  218.90    7.19
   1   5   1  218.21    7.23
   1   5   1  223.71    7.12
  -1   5  -1  216.08    7.07
  -1   5  -1  219.82    6.54
  -2  -5  -1   31.11    3.22
  -2  -5  -1   40.78    3.95
  -2  -5  -1   29.41    3.01
  -2  -5  -1   28.93    2.87
   2  -5   1   39.31    3.33
  -2  -5  -1   36.90    3.13
   2   5   1   34.12    3.45
  -2   5  -1   27.92    3.19
  -2   5  -1   32.87    3.13
  -2   5  -1   31.87    3.30
  -2   5  -1   35.39    3.52
  -2   5  -1   29.83    3.38
  -3  -5  -1   54.08    3.92
  -3  -5  -1   56.99    3.67
  -3  -5  -1   59.37    4.16
   3  -5   1   60.88    3.55
  -3  -5  -1   53.55    3.91
  -3  -5  -1   60.56    4.01
  -3   5  -1   52.31    4.03
   3   5   1   55.44    3.87
  -3   5  -1   57.70    3.92
  -3   5  -1   53.01    3.85
  -3   5  -1   54.28    3.89
  -3   5  -1   59.37    4.48
  -3   5  -1   59.90    4.24
  -4  -5  -1  523.92   13.05
  -4  -5  -1  521.07   12.52
  -4  -5  -1  543.27   13.08
  -4  -5  -1  534.17   13.06
  -4  -5  -1  536.39   13.55
  -4  -5  -1  507.16   13.20
   4  -5   1  511.27   11.70
  -4   5  -1  527.37   13.15
  -4   5  -1  511.97   12.91
  -4   5  -1  525.66   12.81
  -4   5  -1  534.00   12.75
  -4   5  -1  545.21   13.30
  -4   5  -1  548.64   14.21
   4   5   1  535.24   12.33
   5  -5   1  365.99    8.81
  -5  -5  -1  362.08   10.59
  -5  -5  -1  381.11   11.11
  -5  -5  -1  391.49   10.74
  -5  -5  -1  366.08   10.46
  -5  -5  -1  358.70   10.66
  -5  -5  -1  375.08   10.71
  -5   5  -1  387.73   10.73
  -5   5  -1  377.77   10.42
  -5   5  -1  378.95   12.09
   5   5   1  361.65    9.39
  -5   5  -1  375.20   10.60
  -5   5  -1  386.39   10.84
  -5   5  -1  380.90   10.40
  -6  -5  -1   13.56    2.86
  -6  -5  -1    8.11    2.68
  -6  -5  -1    8.81    2.67
  -6  -5  -1    8.47    2.44
  -6  -5  -1   13.71    2.67
  -6  -5  -1   10.75    2.55
  -6   5  -1    9.45    2.58
  -6   5  -1    5.32    2.99
  -6   5  -1   12.28    2.58
  -6   5  -1   12.80    2.57
  -6   5  -1   13.29    2.57
  -6   5  -1   11.58    2.78
  -7  -5  -1  160.77    7.56
  -7  -5  -1  162.18    7.57
  -7  -5  -1  147.97    7.03
  -7  -5  -1  148.12    6.91
  -7  -5  -1  160.17    7.28
  -7  -5  -1  153.33    7.08
  -7   5  -1  146.99    6.75
  -7   5  -1  139.01    6.92
  -7   5  -1  158.69    7.16
  -7   5  -1  130.88    8.52
  -7   5  -1  151.77    6.88
  -7   5  -1  159.89    6.99
  -8  -5  -1  113.31    6.98
  -8  -5  -1  128.92    6.85
  -8  -5  -1  134.11    7.27
  -8  -5  -1  126.52    7.46
  -8  -5  -1  137.34    7.13
  -8   5  -1  135.51    7.10
  -8   5  -1  120.25    6.65
  -8   5  -1  130.89    6.67
  -8   5  -1  129.96    6.90
  -8   5  -1  143.50    6.95
  -8   5  -1  119.80    8.84
  -9  -5  -1    2.27    2.82
  -9  -5  -1   -0.01    2.55
  -9  -5  -1    3.70    2.92
  -9  -5  -1   -0.29    2.51
  -9  -5  -1    3.50    2.60
  -9   5  -1    6.32    3.19
  -9   5  -1    8.70    2.93
  -9   5  -1    5.59    2.76
  -9   5  -1    5.84    4.34
  -9   5  -1    1.72    2.71
 -10  -5  -1    3.83    2.95
 -10  -5  -1    6.67    3.34
 -10  -5  -1   -0.10    2.91
 -10  -5  -1    4.84    3.28
 -10  -5  -1    6.86    3.75
 -10   5  -1    3.48    2.92
 -10   5  -1   10.10    4.92
 -10   5  -1    6.31    3.31
 -10   5  -1    5.27    3.17
 -10   5  -1    4.26    3.03
 -11  -5  -1   17.11    4.60
 -11  -5  -1   15.55    4.21
 -11  -5  -1   12.21    4.91
 -11  -5  -1   16.61    4.30
 -11  -5  -1   14.94    4.58
 -11   5  -1   16.60    4.04
 -11   5  -1   19.78    4.29
 -11   5  -1   20.28    4.33
 -11   5  -1   15.71    6.02
 -11   5  -1   13.20    4.10
 -12  -5  -1   44.53    6.26
 -12  -5  -1   41.27    6.43
 -12  -5  -1   41.48    6.30
 -12  -5  -1   44.70    6.51
 -12   5  -1   31.74    7.77
 -12   5  -1   26.25    4.94
 -12   5  -1   33.33    5.68
 -12  -6   1    1.55    3.52
 -12  -6   1    6.99    3.94
 -12   6   1    3.94    5.41
 -12   6   1    2.24    3.54
 -12   6   1    4.19    3.19
 -11  -6   1    2.37    3.08
 -11  -6   1    3.11    3.20
 -11  -6   1    1.92    3.10
 -11  -6   1   -2.29    2.76
 -11   6   1    4.03    3.08
 -11   6   1    1.79    2.93
 -11   6   1   -0.96    4.42
 -10  -6   1   -2.09    2.35
 -10  -6   1    1.64    2.75
 -10  -6   1    1.57    2.64
 -10  -6   1    4.21    2.92
 -10   6   1   -0.41    2.64
 -10   6   1    1.79    4.21
 -10   6   1    3.71    2.86
 -10   6   1    6.52    3.05
  -9  -6   1    7.51    2.93
  -9  -6   1    8.72    3.02
  -9  -6   1   10.09    3.53
  -9  -6   1   10.39    3.33
  -9  -6   1    5.83    2.68
  -9   6   1   11.85    3.21
  -9   6   1   10.85    2.98
  -9   6   1    9.63    2.87
  -9   6   1   11.93    3.19
  -9   6   1    9.68    2.98
  -9   6   1    8.64    4.69
  -8  -6   1   89.25    5.69
  -8  -6   1  101.17    6.05
  -8  -6   1   78.75    5.86
  -8  -6   1   77.00    5.52
  -8  -6   1   87.86    5.92
  -8   6   1   91.36    5.40
  -8   6   1   98.07    5.83
  -8   6   1   94.35    5.64
  -8   6   1   87.99    5.61
  -8   6   1   87.44    5.44
  -8   6   1   86.11    8.24
  -7  -6   1   31.08    3.78
  -7  -6   1   38.03    4.48
  -7  -6   1   31.94    3.94
  -7  -6   1   38.68    4.27
  -7  -6   1   33.76    3.90
  -7  -6   1   35.06    4.13
  -7   6   1   31.81    3.66
  -7   6   1   33.29    3.57
  -7   6   1   36.43    4.05
  -7   6   1   34.78    3.99
  -7   6   1   35.94    3.76
  -7   6   1   25.84    4.80
  -7   6   1   36.67    4.02
  -6  -6   1    5.52    2.23
  -6  -6   1    8.40    2.53
  -6  -6   1    4.60    1.98
  -6  -6   1    9.98    2.46
  -6  -6   1   10.63    2.34
  -6  -6   1   10.77    2.43
  -6   6   1    6.10    2.10
  -6   6   1    7.51    2.45
  -6   6   1    4.85    1.81
  -6   6   1    3.66    2.17
  -6   6   1    4.60    2.12
  -6   6   1    6.74    2.21
  -6   6   1    9.59    3.44
  -5  -6   1    2.11    1.92
  -5  -6   1    0.19    1.35
  -5  -6   1   -1.36    1.47
  -5  -6   1   -1.06    1.60
  -5  -6   1   -1.21    1.33
  -5  -6   1   -2.28    1.43
  -5   6   1   -0.70    1.26
   5   6  -1    0.60    1.25
  -5   6   1   -1.63    1.71
  -5   6   1   -0.06    1.75
  -5   6   1   -0.63    1.62
  -5   6   1   -0.19    2.30
  -5   6   1    0.87    1.70
  -5   6   1    3.04    1.44
  -4  -6   1  452.39   12.16
  -4  -6   1  444.80   11.99
  -4  -6   1  447.58   11.67
  -4  -6   1  466.88   11.82
   4  -6  -1  460.53   10.40
  -4  -6   1  452.64   10.09
  -4  -6   1  470.26   11.76
  -4   6   1  444.06   11.71
   4   6  -1  446.86   10.97
  -4   6   1  448.54   11.71
  -4   6   1  463.98   11.38
  -4   6   1  450.66   12.82
  -4   6   1  445.44   11.42
  -4   6   1  451.89   11.56
  -4   6   1  457.30    9.98
  -3  -6   1  105.07    5.27
  -3  -6   1  100.46    3.68
  -3  -6   1  100.48    4.96
   3  -6  -1  109.28    4.57
  -3  -6   1  105.76    5.11
  -3  -6   1   94.55    4.97
  -3   6   1  108.39    5.29
  -3   6   1  111.35    5.14
  -3   6   1  109.15    4.04
  -3   6   1   98.91    4.88
  -3   6   1  106.24    5.29
   3   6  -1   99.75    4.86
  -3   6   1  105.45    5.10
  -3   6   1  103.38    5.76
  -2  -6   1  162.17    6.26
  -2  -6   1  159.30    6.54
  -2  -6   1  171.55    6.41
   2  -6  -1  171.22    6.05
  -2  -6   1  169.63    6.26
  -2   6   1  169.34    6.60
  -2   6   1  182.43    6.58
  -2   6   1  183.92    6.33
  -2   6   1  175.78    6.35
   2   6  -1  181.57    6.48
  -2   6   1  173.15    6.65
  -1  -6   1   66.01    4.30
  -1  -6   1   69.86    4.31
   1  -6  -1   71.69    4.20
   1   6  -1   61.32    4.53
   1   6  -1   65.57    4.29
  -1   6   1   64.80    4.44
  -1   6   1   58.23    4.11
  -1   6   1   67.65    4.50
  -1   6   1   65.81    4.43
   1   6  -1   62.72    4.30
  -1   6   1   63.36    4.09
   0  -6   1   77.07    4.41
   0  -6   1   68.81    4.45
   0  -6  -1   69.20    4.36
   0   6   1   72.69    4.66
   0   6  -1   76.05    4.78
   0   6  -1   79.70    4.73
   0   6  -1   78.25    3.81
   1  -6   1   24.61    3.10
  -1  -6  -1   45.48    4.51
   1  -6   1   37.26    3.40
  -1  -6  -1   34.26    3.62
   1   6   1   34.93    3.67
  -1   6  -1   28.19    3.08
  -1   6  -1   27.53    3.70
  -1   6  -1   27.89    3.25
   1   6   1   30.45    3.43
  -2  -6  -1    0.45    2.05
  -2  -6  -1    0.65    1.48
  -2  -6  -1    1.11    1.76
   2  -6   1    2.86    1.75
  -2  -6  -1    1.39    1.76
  -2   6  -1   -0.56    1.70
  -2   6  -1    1.78    2.22
  -2   6  -1    1.40    1.98
  -2   6  -1   -0.22    1.83
   2   6   1    2.67    1.97
  -2   6  -1   -0.59    1.60
  -3  -6  -1  125.94    5.67
  -3  -6  -1  129.56    5.83
  -3  -6  -1  128.62    5.87
  -3  -6  -1  123.28    6.04
  -3  -6  -1  127.49    5.15
   3  -6   1  124.86    5.19
  -3   6  -1  128.48    5.80
  -3   6  -1  129.65    6.02
  -3   6  -1  133.96    6.08
   3   6   1  133.65    5.82
  -3   6  -1  131.08    5.87
  -3   6  -1  123.02    6.19
   4  -6   1  307.77    8.51
  -4  -6  -1  308.90    9.98
  -4  -6  -1  318.91    9.73
  -4  -6  -1  298.61    9.74
  -4  -6  -1  319.03    8.95
  -4  -6  -1  316.90    9.63
  -4  -6  -1  313.72    9.42
  -4   6  -1  314.42    9.65
  -4   6  -1  320.23    9.75
   4   6   1  306.62    9.00
  -4   6  -1  309.16   10.39
  -4   6  -1  304.65    9.66
  -4   6  -1  323.37    9.48
  -4   6  -1  294.75    9.35
  -5  -6  -1   22.00    3.13
   5  -6   1   29.94    2.90
  -5  -6  -1   28.52    3.57
  -5  -6  -1   23.44    3.37
  -5  -6  -1   23.00    3.43
  -5  -6  -1   33.60    4.21
  -5  -6  -1   23.17    3.31
  -5   6  -1   29.18    3.41
  -5   6  -1   31.44    4.72
  -5   6  -1   28.79    3.57
  -5   6  -1   27.11    3.66
  -5   6  -1   24.73    3.37
  -5   6  -1   33.48    4.01
   5   6   1   26.84    3.07
  -6  -6  -1    6.02    2.32
  -6  -6  -1    7.68    2.72
  -6  -6  -1    5.47    2.33
  -6  -6  -1    7.34    2.62
  -6  -6  -1    7.20    2.61
  -6  -6  -1    3.95    2.62
  -6   6  -1   -0.35    2.77
  -6   6  -1    7.68    2.67
  -6   6  -1    4.88    2.29
  -6   6  -1    8.08    2.49
  -6   6  -1    6.25    2.18
  -6   6  -1   10.96    2.87
  -7  -6  -1   13.98    3.28
  -7  -6  -1    4.63    2.68
  -7  -6  -1   14.99    3.26
  -7  -6  -1    6.87    2.96
  -7  -6  -1   19.22    3.76
  -7   6  -1   16.57    4.42
  -7   6  -1   15.14    3.10
  -7   6  -1   16.42    3.13
  -7   6  -1   14.31    3.26
  -7   6  -1   16.70    3.51
  -7   6  -1   13.34    3.18
  -8  -6  -1   13.47    3.43
  -8  -6  -1   13.47    3.58
  -8  -6  -1   14.22    3.57
  -8  -6  -1   10.74    3.11
  -8  -6  -1   12.20    3.58
  -8   6  -1   11.85    3.33
  -8   6  -1   15.11    3.63
  -8   6  -1   10.07    4.33
  -8   6  -1    7.12    3.02
  -8   6  -1    9.53    3.02
  -9  -6  -1   -2.70    2.61
  -9  -6  -1    5.24    3.22
  -9  -6  -1    1.66    2.72
  -9  -6  -1   -0.91    2.59
  -9  -6  -1    6.78    2.99
  -9   6  -1    2.28    4.30
  -9   6  -1   -3.15    2.40
  -9   6  -1   -2.03    2.46
  -9   6  -1   -4.37    2.06
  -9   6  -1    0.92    2.66
 -10  -6  -1   -2.31    2.90
 -10  -6  -1    0.06    3.04
 -10  -6  -1   -2.25    2.58
 -10  -6  -1   -7.67    2.70
 -10  -6  -1    4.59    2.90
 -10   6  -1   -3.44    2.81
 -10   6  -1    2.25    2.85
 -10   6  -1   -0.67    2.76
 -10   6  -1   -4.08    3.60
 -10   6  -1   -1.16    2.81
 -11  -6  -1    1.77    3.40
 -11  -6  -1   -1.16    3.65
 -11  -6  -1    0.07    3.31
 -11  -6  -1    0.13    3.21
 -11   6  -1    4.00    3.50
 -11   6  -1    0.56    3.09
 -11   6  -1   -1.17    3.17
 -11   6  -1   -4.72    4.24
 -11   6  -1   -0.63    2.89
 -12  -6  -1   -2.63    3.31
 -12  -6  -1    2.62    3.51
 -12  -6  -1    1.88    4.10
 -12  -6  -1   -1.45    3.43
 -12   6  -1    3.29    5.18
 -12   6  -1   -1.62    3.15
 -12   6  -1   -2.38    2.95
 -12   6  -1   -3.72    3.43
 -12  -7   1   52.07    6.64
 -12  -7   1   46.35    6.15
 -12  -7   1   57.17    7.26
 -12   7   1   44.17    8.56
 -12   7   1   35.87    5.38
 -12   7   1   55.78    6.53
 -11  -7   1    3.75    3.21
 -11  -7   1    8.69    3.72
 -11  -7   1    5.01    3.59
 -11  -7   1    2.56    3.43
 -11   7   1    6.17    3.21
 -11   7   1   -0.20    4.63
 -11   7   1   -3.13    3.12
 -10  -7   1   26.16    4.71
 -10  -7   1   25.76    4.77
 -10  -7   1   24.25    4.44
 -10  -7   1   25.15    4.89
 -10   7   1   31.61    4.57
 -10   7   1   31.01    4.65
 -10   7   1   32.92    4.86
 -10   7   1   35.51    7.24
 -10   7   1   28.38    4.26
  -9  -7   1   20.86    4.02
  -9  -7   1   12.42    3.65
  -9  -7   1    9.03    3.14
  -9  -7   1   12.52    3.65
  -9   7   1   11.11    4.92
  -9   7   1    9.83    3.18
  -9   7   1   -0.27    2.84
  -9   7   1   10.93    3.07
  -9   7   1   11.86    3.55
  -8  -7   1   14.28    3.48
  -8  -7   1   15.58    3.43
  -8  -7   1   15.79    3.58
  -8  -7   1   14.94    3.22
  -8  -7   1   15.52    3.44
  -8   7   1   15.70    3.43
  -8   7   1   14.69    3.29
  -8   7   1    6.48    2.97
  -8   7   1   10.61    4.56
  -8   7   1   13.08    3.23
  -8   7   1   10.45    2.85
  -7  -7   1   71.95    5.31
  -7  -7   1   70.81    5.99
  -7  -7   1   69.19    5.99
  -7  -7   1   77.96    4.87
  -7  -7   1   75.12    5.56
  -7   7   1   69.13    5.05
  -7   7   1   69.40    5.85
  -7   7   1   66.83    5.66
  -7   7   1   72.08    5.35
  -7   7   1   75.90    5.52
  -7   7   1   60.61    6.94
  -6  -7   1   42.87    4.46
  -6  -7   1   45.82    4.70
  -6  -7   1   49.69    4.18
  -6  -7   1   47.83    5.13
  -6  -7   1   40.91    4.17
  -6  -7   1   46.24    4.58
  -6   7   1   48.00    4.46
  -6   7   1   48.05    4.84
  -6   7   1   44.15    4.32
  -6   7   1   41.95    4.42
  -6   7   1   36.77    5.35
  -6   7   1   38.70    4.14
  -5  -7   1   20.98    3.50
  -5  -7   1   13.50    2.77
  -5  -7   1   18.32    3.12
  -5  -7   1   19.00    3.04
  -5  -7   1   22.51    3.68
  -5  -7   1   16.47    2.39
  -5   7   1   19.31    3.17
  -5   7   1   18.09    3.09
  -5   7   1   18.66    3.95
  -5   7   1   15.10    2.84
  -5   7   1   15.59    2.71
  -5   7   1   17.05    3.07
   5   7  -1   18.48    2.64
  -4  -7   1  404.13   11.57
  -4  -7   1  419.94   11.78
  -4  -7   1  409.77    9.58
  -4  -7   1  417.84   12.07
  -4  -7   1  436.71   12.22
   4  -7  -1  424.46   10.44
  -4  -7   1  401.98   11.43
   4   7  -1  442.50   11.15
  -4   7   1  416.22   12.63
  -4   7   1  411.86   11.46
  -4   7   1  424.36   11.77
  -4   7   1  410.31   11.45
  -4   7   1  425.18   11.31
  -4   7   1  400.69   11.57
  -3  -7   1  371.82   10.53
  -3  -7   1  327.64    8.05
  -3  -7   1  364.99   10.39
  -3  -7   1  364.90   10.47
  -3  -7   1  346.98   10.64
   3  -7  -1  352.48    9.55
  -3   7   1  354.05   10.93
  -3   7   1  343.29   10.25
  -3   7   1  362.61   10.10
  -3   7   1  377.27   10.92
  -3   7   1  340.52   10.59
   3   7  -1  366.76   10.11
  -3   7   1  344.74   10.09
  -3   7   1  359.26    8.58
   2  -7  -1   35.79    3.48
  -2  -7   1   36.15    3.67
  -2  -7   1   38.23    3.83
  -2  -7   1   42.29    4.38
  -2  -7   1   32.02    3.48
  -2   7   1   35.05    3.93
  -2   7   1   35.42    3.69
  -2   7   1   28.51    3.34
  -2   7   1   37.36    3.89
   2   7  -1   31.10    3.58
  -2   7   1   29.79    3.59
   1  -7  -1   70.93    4.52
  -1  -7   1   80.60    5.01
  -1  -7   1   72.09    4.66
   1  -7  -1   76.44    4.82
   1   7  -1   69.59    4.80
  -1   7   1   79.15    5.02
  -1   7   1   85.09    5.13
  -1   7   1   74.62    5.04
  -1   7   1   75.01    4.72
  -1   7   1   73.12    4.67
   1   7  -1   81.70    5.27
   1   7  -1   77.62    4.79
   0  -7  -1  143.26    6.20
   0  -7  -1  157.10    6.63
   0  -7   1  144.62    6.52
   0  -7   1  148.39    6.25
   0   7   1  141.91    6.59
   0   7  -1  150.00    6.85
   0   7  -1  148.55    6.52
   0   7   1  151.26    6.60
   0   7  -1  136.23    5.25
   1  -7   1    4.48    2.13
  -1  -7  -1    3.54    1.95
  -1  -7  -1    3.62    1.79
   1  -7   1    4.34    2.06
   1   7   1    5.55    2.39
   1   7   1    9.20    3.02
  -1   7  -1    4.67    2.24
  -1   7  -1    7.68    2.47
  -1   7  -1    5.35    2.24
  -2  -7  -1   31.64    3.50
  -2  -7  -1   35.46    3.75
  -2  -7  -1   35.74    3.92
   2  -7   1   46.05    4.17
   2   7   1   40.69    4.15
  -2   7  -1   41.24    4.25
   2   7   1   39.70    4.27
  -2   7  -1   33.27    3.92
  -2   7  -1   41.93    4.12
  -2   7  -1   38.02    4.02
  -3  -7  -1   20.71    2.97
  -3  -7  -1   15.78    2.79
  -3  -7  -1   21.04    3.02
  -3  -7  -1   26.96    3.05
   3  -7   1   24.17    2.95
  -3  -7  -1   18.68    2.92
  -3   7  -1   19.94    3.35
  -3   7  -1   19.68    3.41
  -3   7  -1   24.17    3.21
  -3   7  -1   22.02    2.86
  -3   7  -1   18.34    3.18
   3   7   1   17.79    2.98
  -4  -7  -1  213.76    8.37
  -4  -7  -1  231.96    8.89
  -4  -7  -1  244.00    8.71
  -4  -7  -1  224.62    8.35
  -4  -7  -1  229.42    7.54
   4  -7   1  246.90    7.66
  -4   7  -1  244.61    8.53
  -4   7  -1  240.58    8.68
   4   7   1  230.89    8.09
  -4   7  -1  232.85    8.69
  -4   7  -1  232.37    9.20
  -4   7  -1  225.00    8.35
  -4   7  -1  230.78    8.55
   5  -7   1   95.34    4.69
  -5  -7  -1  108.00    6.06
  -5  -7  -1   93.61    6.12
  -5  -7  -1  107.41    5.34
  -5  -7  -1  109.38    6.04
  -5  -7  -1   97.34    5.78
  -5  -7  -1   99.86    6.04
   5   7   1   99.70    5.24
  -5   7  -1   96.77    6.83
  -5   7  -1  102.77    5.90
  -5   7  -1  101.56    5.75
  -5   7  -1  104.34    6.21
  -5   7  -1  106.37    5.89
  -5   7  -1  106.28    6.13
  -6  -7  -1   -0.69    2.26
  -6  -7  -1    2.13    2.12
  -6  -7  -1   -1.49    2.15
  -6  -7  -1    4.95    2.59
  -6  -7  -1   -0.25    1.85
  -6   7  -1    3.21    2.45
  -6   7  -1    3.88    2.56
  -6   7  -1    3.44    2.18
  -6   7  -1   -0.08    1.97
  -6   7  -1    1.38    2.10
  -6   7  -1    0.68    2.87
  -7  -7  -1   77.96    5.79
  -7  -7  -1   72.10    6.09
  -7  -7  -1   74.75    6.74
  -7  -7  -1   70.94    6.41
  -7  -7  -1   70.32    5.96
  -7   7  -1   63.38    5.87
  -7   7  -1   69.38    6.09
  -7   7  -1   69.33    5.94
  -7   7  -1   59.89    7.08
  -7   7  -1   70.85    6.08
  -8  -7  -1  149.46    8.36
  -8  -7  -1  143.37    8.07
  -8  -7  -1  147.89    8.15
  -8  -7  -1  167.25    8.10
  -8  -7  -1  130.93    7.51
  -8   7  -1  134.10    7.75
  -8   7  -1  145.41    7.80
  -8   7  -1  134.13    9.64
  -8   7  -1  140.46    7.72
  -8   7  -1  130.96    7.66
  -9  -7  -1    7.44    3.20
  -9  -7  -1    5.45    2.92
  -9  -7  -1    3.74    3.02
  -9  -7  -1    6.67    3.50
  -9  -7  -1   -0.28    2.93
  -9   7  -1    5.73    4.31
  -9   7  -1    6.38    3.33
  -9   7  -1    1.92    2.96
  -9   7  -1    6.85    3.10
  -9   7  -1    7.04    3.47
 -10  -7  -1   36.91    5.34
 -10  -7  -1   16.48    4.67
 -10  -7  -1   39.15    6.10
 -10  -7  -1   29.77    5.41
 -10   7  -1   36.66    7.10
 -10   7  -1   31.76    5.27
 -10   7  -1   38.72    5.80
 -10   7  -1   35.50    5.35
 -10   7  -1   32.24    5.15
 -11  -7  -1   25.83    5.60
 -11  -7  -1   14.84    4.65
 -11  -7  -1   19.40    5.00
 -11  -7  -1   20.87    5.19
 -11   7  -1   23.39    5.12
 -11   7  -1   14.88    4.39
 -11   7  -1   23.08    6.85
 -11   7  -1   17.83    4.83
 -11   7  -1   18.72    4.46
 -12  -7  -1    3.04    4.68
 -12  -7  -1   -0.65    3.08
 -12  -7  -1    6.16    4.36
 -12   7  -1    6.39    3.81
 -12   7  -1   -0.55    5.19
 -12   7  -1    8.39    4.43
 -12   7  -1    3.99    3.57
 -12  -8   1   55.11    7.06
 -12  -8   1   53.11    7.28
 -12  -8   1   29.60    6.04
 -12  -8   1   31.25    5.95
 -12   8   1   33.32    5.54
 -12   8   1   34.95    8.30
 -12   8   1   36.48    5.67
 -11  -8   1   -2.79    3.29
 -11  -8   1    5.95    3.49
 -11  -8   1   11.12    4.09
 -11  -8   1    2.69    3.94
 -11   8   1    6.15    3.70
 -11   8   1   -3.20    4.55
 -11   8   1   -0.94    3.08
 -11   8   1    4.83    3.66
 -11   8   1    6.76    3.49
 -10  -8   1    2.31    3.38
 -10  -8   1    5.22    3.23
 -10  -8   1    3.50    3.75
 -10  -8   1    0.41    3.13
 -10   8   1    7.82    3.23
 -10   8   1    2.55    3.21
 -10   8   1    2.76    3.32
 -10   8   1    0.83    2.81
 -10   8   1    4.13    4.56
  -9  -8   1  183.90    8.80
  -9  -8   1  169.89    9.15
  -9  -8   1  195.99    9.49
  -9  -8   1  170.59    9.16
  -9   8   1  178.48    8.80
  -9   8   1  189.69    8.90
  -9   8   1  179.04    8.87
  -9   8   1  171.21    8.30
  -9   8   1  166.01   11.20
  -8  -8   1  164.09    8.48
  -8  -8   1  147.52    7.67
  -8  -8   1  157.33    8.17
  -8  -8   1  146.79    8.35
  -8   8   1  173.67   10.39
  -8   8   1  143.03    7.86
  -8   8   1  154.31    7.75
  -8   8   1  152.12    7.82
  -8   8   1  149.52    7.54
  -7  -8   1   10.50    3.19
  -7  -8   1    4.52    2.57
  -7  -8   1    6.86    3.16
  -7  -8   1    6.32    2.79
  -7  -8   1    7.28    2.47
  -7   8   1    1.36    2.41
  -7   8   1    3.53    2.49
  -7   8   1   16.73    4.76
  -7   8   1   10.17    3.05
  -7   8   1    5.78    2.78
  -6  -8   1  207.37    9.08
  -6  -8   1  218.74    7.34
  -6  -8   1  213.17    8.53
  -6  -8   1  222.90    8.82
  -6  -8   1  216.74    8.89
  -6   8   1  219.77   10.18
  -6   8   1  200.04    8.32
  -6   8   1  190.11    8.37
  -6   8   1  229.93    8.93
  -6   8   1  214.85    8.59
  -6   8   1  218.33    8.36
  -5  -8   1  421.38   13.01
  -5  -8   1  423.13   12.37
  -5  -8   1  427.02   12.59
  -5  -8   1  422.42   10.30
  -5  -8   1  431.00   13.07
  -5  -8   1  425.39   12.65
  -5   8   1  418.33   12.48
  -5   8   1  433.89   12.67
   5   8  -1  417.43   11.41
  -5   8   1  406.65   13.66
  -5   8   1  451.28   12.28
  -5   8   1  431.18   12.40
  -5   8   1  429.90   12.46
   4  -8  -1   25.03    3.13
  -4  -8   1   33.41    3.96
  -4  -8   1   21.72    3.17
  -4  -8   1   29.45    2.74
  -4  -8   1   39.30    4.50
  -4  -8   1   26.67    4.13
  -4   8   1   27.20    3.81
  -4   8   1   30.36    2.83
  -4   8   1   30.15    3.93
  -4   8   1   28.80    3.67
  -4   8   1   30.40    3.91
  -4   8   1   36.10    4.79
   4   8  -1   30.62    3.69
  -4   8   1   23.31    3.20
   3  -8  -1    4.44    1.95
  -3  -8   1    5.02    2.19
  -3  -8   1    2.25    1.97
  -3  -8   1    6.35    1.58
  -3  -8   1    4.38    2.19
  -3  -8   1    5.55    1.85
  -3   8   1    4.09    2.06
  -3   8   1    1.17    1.86
  -3   8   1    5.95    1.81
  -3   8   1    5.73    2.66
  -3   8   1    4.88    2.51
   3   8  -1    3.30    2.18
  -3   8   1    5.52    2.72
  -2  -8   1  107.41    6.03
  -2  -8   1  111.31    5.98
  -2  -8   1  112.50    5.65
   2  -8  -1  104.14    5.51
  -2  -8   1  112.13    5.87
   2   8  -1  121.51    6.17
  -2   8   1  106.72    6.07
  -2   8   1  123.05    6.04
  -2   8   1  118.98    6.37
  -2   8   1  115.11    6.22
  -2   8   1  125.02    6.01
   1  -8  -1    2.40    1.99
   1  -8  -1   -0.36    1.90
  -1  -8   1    4.70    2.17
  -1  -8   1    1.02    1.87
   1   8  -1   -1.49    1.87
  -1   8   1    0.44    2.01
  -1   8   1    1.92    1.95
  -1   8   1   -0.99    2.07
  -1   8   1    1.09    2.07
   1   8  -1   -1.41    2.03
  -1   8   1    3.26    2.13
   0  -8   1    3.95    2.57
   0  -8  -1    3.80    2.09
   0  -8   1    4.71    2.13
   0  -8  -1    0.62    1.66
   0   8  -1    2.14    2.27
   0   8   1   10.41    2.77
   0   8  -1    1.41    1.73
   0   8  -1    1.44    2.21
   0   8   1    1.62    2.05
   1  -8   1   82.95    5.39
  -1  -8  -1   77.22    5.18
  -1  -8  -1   83.08    5.40
   1  -8   1   85.66    5.06
   1   8   1   72.06    5.38
  -1   8  -1   91.17    4.93
   1   8   1   76.77    5.44
  -1   8  -1   81.42    5.49
  -1   8  -1   86.05    5.67
  -2  -8  -1  247.50    9.00
  -2  -8  -1  243.07    8.66
   2  -8   1  239.42    8.36
  -2  -8  -1  259.00    9.37
  -2   8  -1  253.15    8.75
   2   8   1  233.75    8.74
  -2   8  -1  247.41    9.04
  -2   8  -1  249.03    8.84
  -2   8  -1  246.57    9.10
   2   8   1  240.55    9.21
   3  -8   1  113.57    5.64
  -3  -8  -1  116.21    6.35
  -3  -8  -1  123.97    6.42
  -3  -8  -1  117.16    6.14
  -3  -8  -1  119.26    5.31
  -3  -8  -1  119.04    6.61
   3   8   1  134.96    6.51
  -3   8  -1  112.93    6.38
  -3   8  -1  117.84    6.51
  -3   8  -1  132.76    6.41
  -3   8  -1  106.13    6.07
  -3   8  -1  113.71    6.49
  -4  -8  -1   97.09    5.97
  -4  -8  -1   90.14    4.87
  -4  -8  -1   93.94    5.93
  -4  -8  -1   88.79    5.58
   4  -8   1   95.95    5.16
  -4  -8  -1   99.70    6.41
  -4   8  -1  112.90    6.46
  -4   8  -1   96.39    5.80
  -4   8  -1  104.40    5.98
  -4   8  -1   99.04    5.92
  -4   8  -1  100.64    6.57
  -4   8  -1  110.03    6.35
   4   8   1  100.34    5.78
  -5  -8  -1  250.56   10.13
  -5  -8  -1  254.46    9.78
  -5  -8  -1  261.55    9.60
  -5  -8  -1  259.52    9.70
  -5  -8  -1  254.82    8.60
  -5   8  -1  264.80    9.91
  -5   8  -1  261.09    9.94
  -5   8  -1  262.85   10.69
   5   8   1  267.20    9.02
  -5   8  -1  258.94    9.55
  -5   8  -1  247.04    9.63
  -5   8  -1  246.55    9.47
  -6  -8  -1  196.74    8.76
  -6  -8  -1  191.03    7.70
  -6  -8  -1  166.99    8.54
  -6  -8  -1  181.91    8.27
  -6  -8  -1  177.56    8.93
  -6   8  -1  184.88    8.31
  -6   8  -1  182.69    8.64
  -6   8  -1  184.73    8.65
  -6   8  -1  186.32    8.27
  -6   8  -1  183.79    9.63
  -7  -8  -1   10.62    3.67
  -7  -8  -1   14.82    3.95
  -7  -8  -1    8.00    2.93
  -7  -8  -1   13.26    3.70
  -7  -8  -1   12.89    3.26
  -7   8  -1   15.71    3.94
  -7   8  -1   16.20    4.85
  -7   8  -1    8.22    3.31
  -7   8  -1   12.44    3.66
  -7   8  -1   11.15    3.60
  -8  -8  -1    9.87    3.74
  -8  -8  -1   12.61    3.42
  -8  -8  -1    8.80    3.21
  -8  -8  -1    5.01    3.39
  -8  -8  -1    5.58    3.10
  -8   8  -1    8.10    4.51
  -8   8  -1    6.52    3.10
  -8   8  -1    2.37    3.03
  -8   8  -1    5.26    3.31
  -8   8  -1    9.53    3.84
  -9  -8  -1   29.53    5.20
  -9  -8  -1   28.91    4.73
  -9  -8  -1   21.73    4.88
  -9  -8  -1   34.57    5.58
  -9   8  -1   32.70    5.13
  -9   8  -1   36.56    5.43
  -9   8  -1   25.68    5.92
  -9   8  -1   37.96    5.88
  -9   8  -1   27.75    4.83
 -10  -8  -1   13.14    4.74
 -10  -8  -1    7.50    4.03
 -10  -8  -1    8.13    3.56
 -10   8  -1    9.40    5.48
 -10   8  -1    7.08    4.24
 -10   8  -1   11.41    3.96
 -10   8  -1    6.01    3.47
 -10   8  -1    9.34    4.17
 -11  -8  -1    2.48    4.15
 -11  -8  -1    9.55    3.85
 -11  -8  -1    5.43    4.32
 -11   8  -1    3.02    3.94
 -11   8  -1    0.47    5.14
 -11   8  -1    1.95    3.88
 -11   8  -1    4.61    4.33
 -11   8  -1    9.93    4.01
 -12  -8  -1   -3.96    4.36
 -12  -8  -1   -0.98    4.28
 -12  -8  -1    2.88    3.90
 -12   8  -1    2.66    5.67
 -12   8  -1   -3.15    4.15
 -12   8  -1    3.16    3.86
 -12   8  -1    2.59    3.81
 -12  -9   1   -4.05    4.11
 -12  -9   1    6.24    4.58
 -12  -9   1    3.73    4.01
 -12   9   1   -1.20    3.72
 -12   9   1   -3.25    5.17
 -12   9   1    0.73    3.37
 -11  -9   1    1.82    3.44
 -11  -9   1   11.10    4.45
 -11  -9   1    6.43    4.37
 -11   9   1    7.09    3.55
 -11   9   1    1.31    5.73
 -11   9   1    3.18    3.51
 -11   9   1    2.86    3.69
 -11   9   1    2.60    3.81
 -10  -9   1    0.65    3.41
 -10  -9   1   -1.75    2.71
 -10  -9   1   -6.66    2.76
 -10  -9   1   -6.18    3.15
 -10   9   1    0.65    3.19
 -10   9   1   -4.11    2.92
 -10   9   1   -0.68    3.28
 -10   9   1   -5.12    3.99
 -10   9   1    0.27    3.42
  -9  -9   1   11.92    4.38
  -9  -9   1    7.02    3.69
  -9  -9   1    6.89    3.89
  -9  -9   1    2.59    2.82
  -9   9   1    3.24    3.14
  -9   9   1    2.81    3.17
  -9   9   1    7.58    3.57
  -9   9   1    7.57    4.94
  -9   9   1    0.61    2.72
  -8  -9   1   -0.35    2.57
  -8  -9   1    3.90    3.24
  -8  -9   1    4.95    3.24
  -8  -9   1    6.24    3.05
  -8   9   1    1.08    4.01
  -8   9   1    0.49    2.85
  -8   9   1    4.74    3.01
  -8   9   1   -5.27    2.64
  -8   9   1   -2.08    2.66
  -7  -9   1   -0.28    2.60
  -7  -9   1    5.71    2.73
  -7  -9   1    5.46    3.13
  -7  -9   1    0.42    2.10
  -7   9   1    6.89    2.91
  -7   9   1   -4.32    3.11
  -7   9   1    3.87    2.96
  -7   9   1    3.89    3.02
  -7   9   1    7.53    3.14
  -6  -9   1  823.20   20.67
  -6  -9   1  848.78   18.02
  -6  -9   1  857.48   21.13
  -6  -9   1  876.46   21.92
  -6  -9   1  836.24   21.04
  -6   9   1  864.76   20.49
  -6   9   1  814.00   22.42
  -6   9   1  847.24   21.01
  -6   9   1  854.38   20.77
  -6   9   1  837.19   20.69
  -5  -9   1    3.59    2.50
  -5  -9   1    5.80    2.38
  -5  -9   1    4.17    1.72
  -5  -9   1    0.41    2.70
  -5  -9   1    3.22    2.27
  -5   9   1    5.97    2.90
  -5   9   1    9.65    3.22
  -5   9   1    5.75    3.51
  -5   9   1    2.61    2.19
  -5   9   1    3.45    2.49
   4  -9  -1    2.76    1.99
  -4  -9   1   -2.15    1.63
  -4  -9   1    0.87    2.19
  -4  -9   1    2.47    2.20
  -4  -9   1    4.10    1.50
  -4  -9   1    3.74    2.08
  -4   9   1   -0.99    2.58
  -4   9   1    0.21    1.37
  -4   9   1    0.35    1.84
  -4   9   1    0.62    2.44
  -4   9   1    3.35    2.54
  -4   9   1    1.15    1.60
   4   9  -1    6.02    2.53
  -4   9   1    0.81    1.85
  -3  -9   1   33.34    4.85
  -3  -9   1   39.77    3.20
  -3  -9   1   35.87    4.15
  -3  -9   1   31.78    4.31
   3  -9  -1   37.36    3.97
  -3  -9   1   42.76    4.92
  -3   9   1   42.43    4.78
  -3   9   1   32.57    4.42
  -3   9   1   42.49    4.96
  -3   9   1   36.15    4.18
  -3   9   1   38.60    3.50
   3   9  -1   39.28    4.50
  -3   9   1   38.07    4.89
  -2  -9   1    8.56    2.77
  -2  -9   1    7.49    2.53
  -2  -9   1    8.39    2.88
  -2  -9   1    3.04    2.24
   2  -9  -1    8.07    2.47
  -2   9   1    3.25    2.02
  -2   9   1    5.64    2.79
   2   9  -1    9.31    2.91
  -2   9   1    4.47    2.39
   2   9  -1    8.45    2.81
  -2   9   1    3.74    2.65
  -2   9   1    7.62    2.69
   1  -9  -1  113.31    6.14
   1  -9  -1  119.66    6.52
  -1  -9   1  115.83    6.32
  -1  -9   1  124.82    6.82
  -1   9   1  118.79    6.78
  -1   9   1  119.10    6.55
   1   9  -1  126.75    6.94
   1   9  -1  111.50    6.54
  -1   9   1  107.55    6.10
  -1   9   1  109.64    6.54
   0  -9  -1  223.76    8.87
   0  -9   1  229.78    9.00
   0  -9   1  211.57    8.43
   0  -9  -1  219.04    8.55
   0   9  -1  229.83    9.00
   0   9  -1  213.09    7.24
   0   9   1  207.37    8.72
   0   9   1  211.06    8.86
   0   9  -1  230.06    8.94
   0   9  -1  203.34    8.90
  -1  -9  -1    4.87    2.46
   1  -9   1    6.31    2.39
   1  -9   1   15.09    3.59
  -1  -9  -1    4.41    2.16
  -1   9  -1    5.81    2.32
  -1   9  -1    6.70    2.80
   1   9   1    7.70    2.88
   1   9   1    9.24    2.66
  -1   9  -1    6.64    2.86
  -2  -9  -1    5.29    2.58
  -2  -9  -1    7.71    2.39
   2  -9   1    5.11    2.16
  -2  -9  -1    3.29    2.45
   2  -9   1    4.66    2.41
   2   9   1    6.68    2.65
  -2   9  -1    2.91    2.48
  -2   9  -1    8.09    2.58
  -2   9  -1    1.85    2.30
  -2   9  -1    4.71    2.35
  -2   9  -1   10.44    2.94
   2   9   1    9.65    2.98
  -3  -9  -1    2.67    2.58
  -3  -9  -1    2.81    2.33
  -3  -9  -1    3.42    1.97
  -3  -9  -1    4.35    2.18
   3  -9   1   -0.32    1.90
  -3  -9  -1    5.08    2.69
  -3   9  -1    6.93    2.66
  -3   9  -1    3.76    2.40
  -3   9  -1    5.26    2.71
   3   9   1    4.62    2.72
  -3   9  -1    3.58    2.41
  -3   9  -1    2.70    2.19
  -4  -9  -1    5.60    2.78
  -4  -9  -1    6.16    2.57
  -4  -9  -1    4.94    2.18
  -4  -9  -1    6.76    2.25
  -4  -9  -1    7.27    2.87
   4  -9   1    6.89    2.39
  -4   9  -1    7.08    3.14
  -4   9  -1   -0.35    1.99
  -4   9  -1   10.09    3.00
   4   9   1    6.94    2.71
  -4   9  -1   12.42    3.44
  -4   9  -1    6.20    2.80
  -5  -9  -1   28.05    4.58
  -5  -9  -1   26.87    4.32
  -5  -9  -1   16.33    3.67
  -5  -9  -1   21.79    3.32
  -5  -9  -1   19.32    3.59
  -5   9  -1   27.45    4.50
  -5   9  -1   18.51    3.45
  -5   9  -1   20.24    3.83
  -5   9  -1   21.13    4.42
  -5   9  -1   15.49    3.44
   5   9   1   20.79    3.67
  -6  -9  -1    5.63    3.18
  -6  -9  -1    2.89    3.14
  -6  -9  -1    5.07    2.68
  -6  -9  -1    3.74    2.62
  -6  -9  -1    8.05    2.62
  -6   9  -1    3.60    3.60
  -6   9  -1    3.24    2.94
  -6   9  -1    0.98    2.43
  -6   9  -1    0.83    2.95
  -6   9  -1    5.88    3.19
  -7  -9  -1  179.33    9.28
  -7  -9  -1  187.99    8.28
  -7  -9  -1  183.51    9.03
  -7  -9  -1  194.95    9.92
  -7  -9  -1  195.81    9.76
  -7   9  -1  173.24   10.45
  -7   9  -1  204.75    9.57
  -7   9  -1  190.74    9.19
  -7   9  -1  175.14    9.30
  -7   9  -1  163.53    8.95
  -8  -9  -1   -0.63    3.05
  -8  -9  -1    0.12    3.32
  -8  -9  -1    0.16    2.35
  -8   9  -1   -1.48    2.86
  -8   9  -1    1.52    3.00
  -8   9  -1   -1.16    3.10
  -8   9  -1   -0.94    2.96
  -8   9  -1   -0.05    4.05
  -9  -9  -1   19.17    5.20
  -9  -9  -1   19.13    4.87
  -9  -9  -1   15.74    4.09
  -9   9  -1   19.83    4.56
  -9   9  -1   18.36    4.88
  -9   9  -1   23.38    5.13
  -9   9  -1   23.29    4.65
  -9   9  -1   18.87    5.89
 -10  -9  -1    7.22    4.23
 -10  -9  -1    4.71    3.60
 -10  -9  -1    3.55    4.21
 -10   9  -1    3.92    4.24
 -10   9  -1    4.61    3.59
 -10   9  -1    9.87    4.24
 -10   9  -1    5.93    4.17
 -10   9  -1   11.15    5.68
 -11  -9  -1    9.70    5.04
 -11  -9  -1   26.42    5.87
 -11  -9  -1   16.27    5.50
 -11   9  -1   21.03    7.62
 -11   9  -1   13.68    5.08
 -11   9  -1   13.59    4.38
 -11   9  -1   13.43    4.53
 -11 -10   1   11.50    4.96
 -11 -10   1   17.98    5.53
 -11 -10   1   13.74    4.65
 -11  10   1   20.69    5.21
 -11  10   1   20.21    6.81
 -11  10   1   10.30    4.03
 -11  10   1   16.14    4.75
 -11  10   1   13.36    4.69
 -10 -10   1   14.69    4.38
 -10 -10   1   15.96    5.19
 -10 -10   1   24.57    5.69
 -10  10   1   17.38    4.69
 -10  10   1    8.82    4.32
 -10  10   1   16.51    4.77
 -10  10   1   22.31    6.18
 -10  10   1   16.03    4.69
  -9 -10   1  136.23    8.53
  -9 -10   1  127.30    9.26
  -9 -10   1  125.79    8.99
  -9  10   1  110.12    8.20
  -9  10   1  118.25   11.52
  -9  10   1  115.11    8.41
  -9  10   1  135.17    8.70
  -9  10   1  128.93    8.36
  -8 -10   1  134.06    8.29
  -8 -10   1  155.36    9.28
  -8 -10   1  124.57    8.89
  -8  10   1  131.16    8.60
  -8  10   1  138.67    8.34
  -8  10   1  148.57   10.63
  -8  10   1  130.07    8.23
  -8  10   1  154.60    8.90
  -7 -10   1    4.72    3.15
  -7 -10   1    2.52    2.68
  -7 -10   1    6.27    3.04
  -7 -10   1    5.31    3.40
  -7  10   1    4.19    2.84
  -7  10   1    5.59    4.37
  -7  10   1    0.08    3.06
  -7  10   1    4.82    3.39
  -7  10   1    1.90    3.19
  -6 -10   1   88.71    7.55
  -6 -10   1   97.23    7.39
  -6 -10   1  113.31    6.98
  -6 -10   1  111.60    7.26
  -6  10   1   92.50    7.31
  -6  10   1  100.53    9.18
  -6  10   1   99.02    6.95
  -6  10   1  109.75    7.24
  -6  10   1  105.11    6.91
  -5 -10   1  200.96    6.66
  -5 -10   1  200.29    8.94
  -5 -10   1  196.34    9.13
  -5 -10   1  218.84    9.91
  -5 -10   1  197.49    9.21
  -5  10   1  229.39    9.61
  -5  10   1  211.91    9.28
  -5  10   1  187.90    8.64
  -5  10   1  208.12   10.12
  -5  10   1  199.38    9.48
   4 -10  -1    1.68    2.04
  -4 -10   1    7.83    2.95
  -4 -10   1    0.65    1.82
  -4 -10   1    3.90    1.49
  -4 -10   1    5.51    2.66
  -4 -10   1    3.53    2.43
  -4  10   1    1.38    2.54
  -4  10   1    2.70    2.95
  -4  10   1    2.12    2.86
  -4  10   1    4.47    2.41
  -4  10   1   -0.81    1.99
  -4  10   1    1.61    1.53
   4  10  -1   -0.40    2.07
  -3 -10   1  112.55    6.76
  -3 -10   1  102.46    6.82
  -3 -10   1  105.74    6.68
  -3 -10   1  111.60    6.33
  -3 -10   1  109.10    4.67
   3 -10  -1  106.96    6.07
  -3  10   1  110.84    4.96
  -3  10   1  105.98    6.88
  -3  10   1  110.01    6.98
   3  10  -1   96.31    6.34
  -3  10   1  115.28    6.82
  -3  10   1  118.45    6.76
  -3  10   1  110.93    7.05
  -2 -10   1    5.42    1.72
   2 -10  -1    8.28    2.78
  -2 -10   1    9.39    2.81
  -2 -10   1    8.44    2.96
  -2  10   1    5.67    2.54
  -2  10   1    6.55    2.82
  -2  10   1    6.64    2.81
   2  10  -1    8.16    3.37
  -2  10   1    1.72    2.54
   2  10  -1   10.12    3.17
  -2  10   1    9.46    3.08
  -2  10   1    7.98    2.35
   1 -10  -1  254.93   10.12
   1 -10  -1  274.02    9.90
  -1 -10   1  265.00   10.44
  -1 -10   1  271.06   10.06
   1  10  -1  277.70   10.41
   1  10  -1  255.88   10.39
  -1  10   1  266.57   10.32
  -1  10   1  244.39    9.89
  -1  10   1  267.01   10.43
   0 -10   1    7.39    2.91
   0 -10  -1    8.30    2.73
   0 -10   1    5.96    3.03
   0 -10  -1    4.94    2.20
   0  10  -1    5.53    2.83
   0  10   1   14.52    3.45
   0  10   1    6.52    3.46
   0  10  -1   12.22    3.46
   0  10  -1   10.32    3.08
  -1 -10  -1  413.43   13.02
   1 -10   1  409.71   13.37
   1 -10   1  421.45   12.78
  -1 -10  -1  424.14   13.65
   1  10   1  419.95   13.69
   1  10   1  427.25   13.38
  -1  10  -1  417.38   11.91
  -1  10  -1  391.79   13.08
  -1  10  -1  431.33   13.90
   2 -10   1  603.20   16.15
   2 -10   1  620.64   17.30
  -2 -10  -1  634.63   17.59
  -2 -10  -1  600.66   16.74
  -2 -10  -1  612.22   16.74
  -2  10  -1  602.26   17.08
  -2  10  -1  592.68   16.67
  -2  10  -1  621.99   17.02
  -2  10  -1  636.10   15.99
  -2  10  -1  573.80   16.26
   2  10   1  612.05   16.67
  -3 -10  -1   79.11    6.07
  -3 -10  -1   71.28    5.57
   3 -10   1   70.57    5.40
  -3 -10  -1   62.55    5.81
  -3 -10  -1   75.10    4.69
  -3  10  -1   83.35    7.35
  -3  10  -1   75.76    6.96
  -3  10  -1   76.98    6.70
  -3  10  -1   73.50    6.81
   3  10   1   84.33    6.25
  -3  10  -1   65.42    6.29
  -4 -10  -1   14.13    3.58
  -4 -10  -1   16.39    3.77
  -4 -10  -1   15.35    2.76
   4 -10   1   15.94    3.26
  -4 -10  -1   10.92    2.91
  -4  10  -1   16.13    3.96
  -4  10  -1   18.63    4.21
  -4  10  -1    7.95    3.01
  -4  10  -1   10.83    3.04
   4  10   1   12.93    3.44
  -4  10  -1   22.12    4.43
  -5 -10  -1  141.89    8.55
  -5 -10  -1  139.66    6.52
  -5 -10  -1  121.11    7.70
  -5 -10  -1  147.59    7.92
  -5  10  -1  141.76    8.58
  -5  10  -1  135.15    8.18
  -5  10  -1  142.62    8.28
   5  10   1  134.13    7.57
  -5  10  -1  134.42    7.80
  -5  10  -1  151.57    7.94
  -6 -10  -1   67.07    5.67
  -6 -10  -1   53.69    5.73
  -6 -10  -1   52.09    6.13
  -6 -10  -1   72.21    7.57
  -6  10  -1   53.78    6.39
  -6  10  -1   61.99    6.74
  -6  10  -1   68.21    6.80
  -6  10  -1   53.59    6.23
  -6  10  -1   57.89    7.37
  -7 -10  -1  117.86    7.77
  -7 -10  -1  128.98    8.86
  -7 -10  -1  124.50    6.98
  -7 -10  -1  105.44    9.10
  -7  10  -1  125.16    8.07
  -7  10  -1  118.39    8.47
  -7  10  -1  126.70    8.52
  -7  10  -1  128.00    9.52
  -7  10  -1  106.53    7.66
  -8 -10  -1   50.17    6.69
  -8 -10  -1   66.10    7.52
  -8 -10  -1   52.60    6.11
  -8  10  -1   46.70    7.78
  -8  10  -1   55.54    6.67
  -8  10  -1   54.75    6.72
  -8  10  -1   55.71    7.12
  -8  10  -1   59.78    7.15
  -9 -10  -1   17.81    5.27
  -9 -10  -1    3.46    3.20
  -9 -10  -1   15.70    4.97
  -9  10  -1   16.89    4.67
  -9  10  -1   11.76    4.22
  -9  10  -1   -0.29    4.58
  -9  10  -1   17.93    4.95
 -10 -10  -1    0.10    4.35
 -10 -10  -1   -0.77    4.51
 -10  10  -1    3.30    3.65
 -10  10  -1    1.42    4.06
 -10  10  -1   -1.29    3.71
 -10  10  -1    3.48    5.18
 -11 -10  -1   -3.68    4.63
 -11 -10  -1    5.95    5.15
 -11  10  -1    6.85    5.76
 -11  10  -1    1.62    4.29
 -11  10  -1    2.63    3.73
 -11  10  -1    4.65    4.48
 -11 -11   1   19.62    6.05
 -11 -11   1   12.63    5.64
 -11  11   1   14.67    5.92
 -11  11   1   13.53    5.06
 -11  11   1   12.96    4.72
 -11  11   1   13.96    4.16
 -10 -11   1   29.21    6.30
 -10 -11   1   44.03    6.95
 -10  11   1   36.56    6.25
 -10  11   1   24.92    7.12
 -10  11   1   48.34    6.78
 -10  11   1   41.38    6.42
  -9 -11   1   10.01    4.51
  -9 -11   1   10.32    3.83
  -9 -11   1   16.46    5.38
  -9  11   1   10.88    4.41
  -9  11   1    7.06    3.97
  -9  11   1    8.66    5.01
  -9  11   1    2.46    3.74
  -8 -11   1    2.35    3.66
  -8 -11   1   10.61    3.54
  -8 -11   1    0.54    3.70
  -8  11   1    6.70    4.00
  -8  11   1    6.37    3.51
  -8  11   1    3.45    2.97
  -8  11   1   -0.57    3.17
  -8  11   1    6.51    4.73
  -7 -11   1  125.83    8.48
  -7 -11   1  126.79    8.04
  -7 -11   1  125.82    8.69
  -7  11   1  116.48    8.34
  -7  11   1  141.08    8.65
  -7  11   1  135.85    8.32
  -7  11   1  115.26   10.75
  -7  11   1  122.90    8.57
  -6 -11   1  128.39    7.83
  -6 -11   1  139.02    8.80
  -6 -11   1  135.37    8.41
  -6  11   1  126.09    7.97
  -6  11   1  123.47    8.37
  -6  11   1  137.41    8.02
  -6  11   1  134.16    9.32
  -6  11   1  123.53    8.26
  -5 -11   1    0.40    2.59
  -5 -11   1   -1.09    2.84
  -5 -11   1    1.90    2.12
  -5  11   1    5.49    3.65
  -5  11   1   -4.35    2.09
  -5  11   1    3.97    3.80
  -5  11   1   -0.54    2.23
  -5  11   1   -1.86    2.66
   4 -11  -1   36.89    4.68
  -4 -11   1   27.46    4.41
  -4 -11   1   37.25    4.89
  -4 -11   1   35.80    5.06
  -4 -11   1   45.82    3.79
   4  11  -1   36.96    4.91
  -4  11   1   35.75    5.38
  -4  11   1   38.53    3.66
  -4  11   1   50.22    6.05
  -4  11   1   30.07    4.64
  -4  11   1   34.93    5.06
  -4  11   1   42.07    5.04
   3 -11  -1  469.03   13.61
  -3 -11   1  474.83   15.20
  -3 -11   1  453.37   14.53
  -3  11   1  444.96   14.44
  -3  11   1  428.51   11.39
  -3  11   1  459.23   14.92
  -3  11   1  482.63   14.77
  -3  11   1  450.77   14.57
   3  11  -1  461.97   14.29
  -2 -11   1  229.31   10.04
   2 -11  -1  222.36    9.27
  -2 -11   1  229.47    9.79
  -2  11   1  230.95    9.99
   2  11  -1  234.79    9.83
  -2  11   1  215.90    9.86
  -2  11   1  207.96    9.30
  -2  11   1  200.31    9.36
  -2  11   1  232.79   10.15
   1 -11  -1    1.10    2.35
  -1 -11   1    0.93    2.46
   1 -11  -1    0.34    2.03
  -1 -11   1   -1.60    1.97
  -1  11   1    1.14    2.57
   1  11  -1   -2.64    2.09
  -1  11   1   -2.92    2.46
   1  11  -1    4.28    3.03
   0 -11   1  211.60    9.31
   0 -11  -1  210.06    9.55
   0 -11  -1  202.44    9.13
   0 -11   1  213.16    9.69
   0  11   1  195.69    9.49
   0  11  -1  198.79    9.33
   0  11  -1  185.57    9.31
   0  11  -1  195.60    9.59
   0  11   1  200.95    9.59
  -1 -11  -1  163.02    8.63
   1 -11   1  155.98    8.08
  -1 -11  -1  176.01    8.61
  -1  11  -1  176.17    9.03
   1  11   1  159.42    8.75
   1  11   1  153.05    8.45
  -1  11  -1  162.47    8.72
  -1  11  -1  174.01    7.65
   2 -11   1    8.47    3.04
  -2 -11  -1   12.20    3.43
  -2 -11  -1    7.19    3.15
  -2  11  -1    6.45    3.00
  -2  11  -1    8.97    3.45
  -2  11  -1   12.45    3.62
  -2  11  -1    3.53    3.43
   2  11   1   10.92    3.64
  -3 -11  -1  287.32   11.80
  -3 -11  -1  278.27   11.10
  -3 -11  -1  276.16    9.33
   3 -11   1  305.14   10.86
  -3  11  -1  275.60   11.14
  -3  11  -1  279.88   11.50
  -3  11  -1  295.46   11.14
   3  11   1  287.48   11.18
  -3  11  -1  273.43   11.29
   4 -11   1  221.20    8.94
  -4 -11  -1  202.17   10.20
  -4 -11  -1  203.90    9.74
  -4 -11  -1  209.93    7.96
   4  11   1  206.43    9.45
  -4  11  -1  208.52   10.04
  -4  11  -1  185.11    9.48
  -4  11  -1  212.45    9.80
  -4  11  -1  209.13   10.06
  -5 -11  -1   62.46    6.73
  -5 -11  -1   56.36    5.18
  -5 -11  -1   55.67    6.41
  -5  11  -1   45.24    5.53
  -5  11  -1   44.04    5.76
  -5  11  -1   61.97    7.08
  -5  11  -1   74.61    8.01
  -6 -11  -1   -0.27    3.09
  -6 -11  -1    4.35    3.53
  -6 -11  -1   -1.39    1.82
  -6  11  -1    2.49    3.54
  -6  11  -1    6.60    3.65
  -6  11  -1    1.93    3.47
  -6  11  -1    2.46    2.89
  -7 -11  -1  157.90   10.12
  -7 -11  -1  173.15   10.25
  -7  11  -1  187.36    9.91
  -7  11  -1  167.07   11.10
  -7  11  -1  165.46    9.98
  -7  11  -1  167.59    9.81
  -8 -11  -1  132.04    9.70
  -8 -11  -1  125.81    9.74
  -8  11  -1  151.67    9.58
  -8  11  -1  134.04    9.81
  -8  11  -1  145.37    9.64
  -8  11  -1  153.76   11.20
  -9 -11  -1   -4.76    4.15
  -9 -11  -1    3.14    4.28
  -9  11  -1    1.67    4.70
  -9  11  -1    2.33    3.79
  -9  11  -1   -2.11    3.83
  -9  11  -1    0.34    3.38
 -10 -11  -1    7.09    4.78
 -10 -11  -1   -1.68    4.40
 -10  11  -1    3.90    4.35
 -10  11  -1   -0.56    3.30
 -10  11  -1    3.21    4.80
 -10  11  -1   12.79    6.23
 -11 -11  -1   92.41   10.57
 -11 -11  -1   88.12   10.36
 -11  11  -1   89.63    9.22
 -11  11  -1   60.77    8.33
 -11  11  -1   84.84   11.41
 -11 -12   1    6.21    5.66
 -11 -12   1   -1.76    4.70
 -11  12   1   -3.35    3.88
 -11  12   1    6.49    4.30
 -11  12   1    1.58    4.42
 -11  12   1   -5.92    4.85
 -10 -12   1   -2.27    4.40
 -10 -12   1    2.80    4.63
 -10  12   1    2.24    4.34
 -10  12   1   -8.51    3.95
 -10  12   1   -6.15    3.77
 -10  12   1    2.37    3.70
  -9 -12   1    9.41    4.93
  -9 -12   1    5.90    4.38
  -9  12   1    0.05    3.89
  -9  12   1    8.35    5.24
  -9  12   1    2.98    4.18
  -9  12   1    4.03    3.84
  -8 -12   1   25.57    5.62
  -8 -12   1   27.56    5.99
  -8  12   1   27.50    5.87
  -8  12   1   23.64    5.14
  -8  12   1   19.78    5.42
  -8  12   1   14.38    5.79
  -7 -12   1    2.24    3.43
  -7 -12   1   -0.39    3.25
  -7  12   1   -1.48    3.66
  -7  12   1    3.53    4.01
  -7  12   1    2.12    4.25
  -7  12   1    0.75    3.35
  -6 -12   1   35.06    5.73
  -6 -12   1   32.42    5.94
  -6  12   1   26.81    5.68
  -6  12   1   27.00    4.95
  -6  12   1   19.52    4.77
  -6  12   1   37.96    6.07
  -5 -12   1    7.55    3.67
  -5 -12   1   -4.08    3.01
  -5  12   1    6.22    3.64
  -5  12   1    4.24    3.14
  -5  12   1    5.29    3.72
  -5  12   1    4.51    3.75
  -4 -12   1   34.04    5.96
  -4 -12   1   35.04    5.23
  -4  12   1   35.73    5.38
  -4  12   1   43.88    6.00
  -4  12   1   48.62    6.69
   4  12  -1   33.42    5.24
  -4  12   1   35.73    5.20
   3 -12  -1   21.17    3.74
  -3 -12   1   33.84    5.07
  -3 -12   1   33.20    5.67
  -3  12   1   30.99    3.56
   3  12  -1   32.43    5.12
  -3  12   1   29.07    5.01
  -3  12   1   30.40    5.22
  -3  12   1   38.35    5.69
  -3  12   1   32.36    5.32
   2 -12  -1   -0.25    2.36
  -2 -12   1   -0.24    2.73
  -2 -12   1    0.34    2.50
  -2  12   1   -1.98    2.52
   2  12  -1   -1.37    2.57
  -2  12   1   -0.11    2.69
  -2  12   1    5.00    3.35
   1 -12  -1    8.76    2.93
  -1 -12   1    7.18    3.28
  -1 -12   1    8.43    2.99
  -1  12   1    2.96    3.16
   1  12  -1    7.63    3.50
  -1  12   1   11.56    3.85
   0 -12  -1   -1.33    2.09
   0 -12  -1   -1.83    2.18
   0 -12   1   -2.76    2.51
   0 -12   1   -3.07    2.19
   0  12  -1   -3.00    2.30
   0  12  -1   -3.57    2.48
   0  12   1    0.46    3.12
   0  12   1    2.45    3.16
   0  12  -1    0.10    2.72
  -1 -12  -1    0.83    2.47
   1 -12   1   -0.65    2.59
  -1 -12  -1    0.96    2.81
   1  12   1    2.92    3.21
  -1  12  -1    3.38    3.21
  -1  12  -1   -0.39    2.76
  -1  12  -1   -0.65    3.05
  -1  12  -1    0.69    2.73
   1  12   1    5.81    3.15
   2 -12   1    8.35    3.20
  -2 -12  -1   10.38    3.44
  -2 -12  -1    7.33    3.46
  -2  12  -1    2.20    3.05
  -2  12  -1   13.96    4.27
  -2  12  -1    9.66    4.14
   2  12   1   12.05    3.83
  -3 -12  -1   30.95    5.82
  -3 -12  -1   26.20    4.36
   3 -12   1   22.84    4.23
   3  12   1   28.35    5.02
  -3  12  -1   32.97    5.22
  -3  12  -1   34.58    5.30
  -3  12  -1   26.94    5.19
   4 -12   1   30.12    4.59
  -4 -12  -1   30.57    5.07
  -4 -12  -1   31.06    5.10
  -4 -12  -1   29.42    4.05
  -4  12  -1   29.61    5.21
  -4  12  -1   37.87    5.78
   4  12   1   29.08    4.89
  -4  12  -1   33.79    5.69
  -5 -12  -1  182.38   10.29
  -5 -12  -1  178.36   10.01
  -5 -12  -1  170.00    7.42
  -5  12  -1  185.62    9.93
  -5  12  -1  169.09    9.95
  -5  12  -1  168.22   10.18
  -6 -12  -1    2.24    3.75
  -6 -12  -1    2.31    4.04
  -6  12  -1    1.44    3.34
  -6  12  -1   -0.34    3.84
  -6  12  -1    3.45    4.52
  -7 -12  -1   15.94    5.05
  -7 -12  -1    8.73    4.69
  -7  12  -1   17.20    5.81
  -7  12  -1   28.10    5.59
  -7  12  -1   24.07    5.35
  -8 -12  -1   -4.79    3.49
  -8 -12  -1   -1.84    3.58
  -8  12  -1    8.17    5.22
  -8  12  -1   -0.10    3.49
  -8  12  -1   -3.28    3.95
  -9 -12  -1    5.51    4.42
  -9 -12  -1    1.04    4.50
  -9  12  -1    3.67    4.37
  -9  12  -1   -3.22    5.11
  -9  12  -1    3.85    4.80
 -10 -12  -1    7.04    5.41
 -10 -12  -1   -2.57    4.42
 -10  12  -1    4.60    4.48
 -10  12  -1   -6.63    3.88
 -10  12  -1    2.19    5.70
 -10 -13   1   19.68    6.50
 -10 -13   1   25.74    6.44
 -10  13   1   18.43    5.70
 -10  13   1   29.69    6.40
 -10  13   1   14.05    6.50
  -9 -13   1    0.36    4.68
  -9 -13   1    2.81    4.72
  -9  13   1    8.17    4.75
  -9  13   1   -0.46    4.47
  -9  13   1   10.39    5.38
  -8 -13   1   44.07    7.52
  -8 -13   1   33.73    6.57
  -8  13   1   40.06    6.73
  -8  13   1   40.00    6.95
  -8  13   1   37.72    7.26
  -7 -13   1   31.74    5.86
  -7 -13   1   34.56    6.22
  -7  13   1   19.17    5.50
  -7  13   1   39.27    6.50
  -7  13   1   44.90    7.19
  -6 -13   1   20.96    5.35
  -6 -13   1   24.00    5.44
  -6  13   1   22.65    5.21
  -6  13   1   22.11    5.63
  -6  13   1   26.92    5.35
  -5 -13   1   16.63    4.92
  -5 -13   1   10.28    4.32
  -5  13   1   12.68    4.16
  -5  13   1   17.86    5.39
  -5  13   1    4.59    4.15
  -4 -13   1   21.56    4.84
  -4 -13   1   22.17    4.78
  -4  13   1   30.14    5.51
   4  13  -1   25.35    5.06
  -4  13   1   32.42    5.83
  -4  13   1   26.66    5.40
  -3 -13   1   52.95    6.60
   3 -13  -1   58.66    6.23
  -3 -13   1   67.68    8.08
   3  13  -1   52.48    6.49
  -3  13   1   64.71    7.16
  -3  13   1   63.95    7.14
  -3  13   1   56.40    4.99
  -3  13   1   42.92    6.10
  -3  13   1   48.17    6.05
  -2 -13   1   30.24    5.08
   2 -13  -1   24.50    4.64
  -2 -13   1   28.06    5.03
  -2  13   1   27.04    4.95
  -2  13   1   29.35    5.27
   2  13  -1   30.61    5.37
  -1 -13   1   53.56    6.33
  -1 -13   1   34.53    4.97
   1 -13  -1   56.71    6.19
  -1  13   1   48.10    6.18
   1  13  -1   52.67    6.41
  -1  13   1   69.74    7.82
   0 -13  -1   80.50    7.71
   0 -13   1   97.46    8.38
   0  13   1   78.99    7.81
   0  13  -1   82.77    8.91
   0  13  -1   76.91    7.48
   0  13   1   88.43    9.51
  -1 -13  -1   20.30    4.37
  -1 -13  -1   23.31    5.22
   1 -13   1   24.26    4.61
  -1  13  -1   33.03    5.56
  -1  13  -1   14.56    4.37
  -1  13  -1   36.06    6.56
   1  13   1   26.66    5.29
   2 -13   1    9.92    3.58
  -2 -13  -1    8.02    3.62
  -2 -13  -1    1.12    2.76
   2  13   1    3.94    3.52
  -2  13  -1    3.00    2.99
  -2  13  -1   -4.01    2.90
  -2  13  -1   -1.24    2.76
   3 -13   1   58.84    6.21
  -3 -13  -1   68.74    7.40
  -3 -13  -1   59.10    6.89
   3  13   1   76.49    7.63
  -3  13  -1   73.70    7.47
  -3  13  -1   68.96    7.33
  -3  13  -1   60.36    7.26
  -4 -13  -1  139.60    9.63
  -4 -13  -1  116.09    6.37
  -4 -13  -1  140.71    9.17
  -4  13  -1  115.03    8.58
  -4  13  -1  131.80    9.65
  -4  13  -1  120.86    8.71
   4  13   1  142.65    9.07
  -5 -13  -1    0.05    3.65
  -5 -13  -1    4.79    3.52
  -5  13  -1   -2.53    3.10
  -5  13  -1   -0.07    4.08
  -5  13  -1    3.42    3.97
  -6 -13  -1    6.60    4.29
  -6 -13  -1   -1.85    3.81
  -6  13  -1    5.05    4.43
  -6  13  -1    2.17    3.53
  -6  13  -1    7.64    4.01
  -7 -13  -1   71.20    8.70
  -7 -13  -1   68.91    8.24
  -7  13  -1   52.87    7.09
  -7  13  -1   48.36    8.28
  -7  13  -1   61.39    8.17
  -8 -13  -1    8.42    4.94
  -8 -13  -1    4.32    4.58
  -8  13  -1    3.37    4.34
  -8  13  -1    5.13    4.33
  -8  13  -1   -1.59    4.79
  -9 -13  -1   33.92    7.26
  -9 -13  -1   29.45    6.40
  -9  13  -1   26.61    7.56
  -9  13  -1   27.52    6.77
  -9  13  -1   35.92    7.22
 -10 -13  -1   -4.12    4.95
 -10 -13  -1   13.65    6.06
 -10  13  -1    1.35    5.98
 -10  13  -1   10.13    5.80
 -10  13  -1   10.73    5.97
 -10 -14   1   17.43    6.69
 -10 -14   1   10.40    6.18
 -10  14   1    6.86    6.42
 -10  14   1    8.68    5.18
 -10  14   1   -1.57    5.02
  -9 -14   1   78.58    9.78
  -9 -14   1   86.56   10.56
  -9  14   1   77.79    9.35
  -9  14   1   76.12    9.76
  -9  14   1   83.04   11.31
  -8 -14   1   29.51    6.58
  -8 -14   1   40.76    7.82
  -8  14   1   19.00    5.98
  -8  14   1   32.63    7.59
  -8  14   1   30.50    6.26
  -7 -14   1   13.40    4.95
  -7 -14   1   10.92    5.03
  -7  14   1   23.24    6.05
  -7  14   1   26.69    6.71
  -7  14   1   28.18    6.22
  -6 -14   1   18.86    5.39
  -6 -14   1    4.97    4.32
  -6  14   1   15.42    4.79
  -6  14   1   18.27    5.48
  -6  14   1   13.04    5.10
  -5 -14   1  207.07   11.58
  -5 -14   1  182.88   11.42
  -5  14   1  201.01   11.22
  -5  14   1  186.52   11.30
  -5  14   1  210.18   11.70
  -4 -14   1   52.79    6.73
  -4 -14   1   57.45    7.05
  -4  14   1   45.19    6.55
  -4  14   1   52.70    7.03
  -4  14   1   47.77    6.78
   4  14  -1   45.46    6.99
  -4  14   1   51.91    7.24
   3 -14  -1   26.19    5.05
  -3 -14   1   17.16    4.78
  -3 -14   1   17.00    4.74
  -3  14   1   24.26    5.43
  -3  14   1   30.49    5.77
  -3  14   1   30.46    5.98
   3  14  -1   38.02    6.21
  -3  14   1   24.59    5.02
   2 -14  -1   52.42    6.55
  -2 -14   1   59.42    7.12
  -2 -14   1   82.94    9.21
  -2  14   1   57.56    7.36
  -2  14   1   69.66    7.96
   2  14  -1   62.57    7.19
  -1 -14   1  184.32   10.43
   1 -14  -1  191.89   10.06
  -1  14   1  174.23   10.74
  -1  14   1  203.86   11.24
   1  14  -1  200.36   11.08
   0 -14  -1    2.25    3.30
   0 -14   1    5.73    3.58
   0  14   1    7.54    4.20
   0  14  -1    0.05    3.80
  -1 -14  -1  167.19    9.83
   1 -14   1  171.90    9.79
  -1  14  -1  151.46    9.82
  -1  14  -1  177.13   10.65
   1  14   1  157.23   10.24
  -1  14  -1  171.68   10.53
  -2 -14  -1  224.49   11.40
  -2 -14  -1  243.13   12.25
   2 -14   1  254.40   11.43
  -2  14  -1  240.37   10.73
  -2  14  -1  242.92   12.38
   2  14   1  233.20   11.73
  -2  14  -1  203.49   11.53
  -2  14  -1  212.22   11.51
  -3 -14  -1   41.93    6.25
   3 -14   1   50.74    6.24
  -3 -14  -1   35.65    5.85
  -3  14  -1   39.18    6.07
   3  14   1   36.72    5.95
  -3  14  -1   40.43    6.37
  -3  14  -1   66.25    8.59
  -4 -14  -1   22.17    5.47
  -4 -14  -1   11.38    4.34
  -4  14  -1   22.75    5.33
  -4  14  -1   22.21    5.62
  -4  14  -1   17.36    4.66
   4  14   1   29.10    5.60
  -5 -14  -1   97.17    9.46
  -5 -14  -1  121.75   11.25
  -5  14  -1  100.61   10.75
  -5  14  -1  111.66   10.06
  -5  14  -1   85.72    8.57
  -6 -14  -1    6.42    4.66
  -6 -14  -1    9.31    5.01
  -6  14  -1    3.41    4.77
  -6  14  -1    4.31    4.94
  -6  14  -1    7.29    4.43
  -7 -14  -1   -0.17    4.66
  -7 -14  -1   -3.43    4.08
  -7  14  -1   -2.18    4.45
  -7  14  -1   -1.90    4.73
  -7  14  -1   -2.57    3.44
  -8 -14  -1    0.07    4.84
  -8 -14  -1    1.34    4.21
  -8  14  -1   -1.65    4.07
  -8  14  -1    6.48    5.16
  -8  14  -1   -2.89    4.64
  -9 -14  -1   88.35   10.34
  -9 -14  -1   69.34    9.54
  -9  14  -1   73.33    9.78
  -9  14  -1   83.25   10.19
  -9  14  -1   82.82   11.19
 -10 -14  -1   57.68    9.28
 -10 -14  -1   42.89    8.48
 -10  14  -1   42.45    9.38
 -10  14  -1   56.16    9.11
 -10  14  -1   49.37    8.78
  -9 -15   1    0.09    4.74
  -9 -15   1   -8.94    5.00
  -9  15   1    2.67    4.64
  -9  15   1   -8.98    4.61
  -9  15   1    2.16    5.30
  -8 -15   1    6.47    5.52
  -8 -15   1    1.04    5.09
  -8  15   1   -3.35    4.05
  -8  15   1    4.21    4.68
  -8  15   1    4.87    5.70
  -7 -15   1    9.69    5.48
  -7 -15   1   11.77    5.46
  -7  15   1   14.08    5.03
  -7  15   1   12.26    6.02
  -7  15   1    4.04    4.65
  -6 -15   1   18.78    5.77
  -6 -15   1    5.32    4.61
  -6  15   1   14.03    5.72
  -6  15   1   22.07    6.07
  -6  15   1   15.19    5.02
  -5 -15   1   54.24    7.60
  -5 -15   1   60.15    8.58
  -5  15   1   50.35    7.50
  -5  15   1   44.60    7.37
  -5  15   1   48.80    7.17
  -5  15   1   54.99    7.45
  -4 -15   1    5.59    4.27
  -4 -15   1    7.32    4.18
  -4  15   1    6.88    4.47
  -4  15   1   15.98    4.87
  -4  15   1    3.12    4.34
  -4  15   1    7.77    4.77
  -3 -15   1   -0.93    3.67
  -3 -15   1    5.52    4.03
   3  15  -1    0.06    3.61
  -3  15   1    4.09    4.81
  -3  15   1    0.78    3.95
   2 -15  -1   19.23    4.81
  -2 -15   1   23.42    5.48
  -2  15   1   15.08    5.18
   2  15  -1   33.46    6.09
  -2  15   1   31.34    6.31
   1 -15  -1   20.66    4.77
  -1 -15   1   23.87    5.15
  -1  15   1   11.28    4.99
   1  15  -1   16.73    4.99
   0 -15  -1   12.52    4.70
   0 -15   1    9.38    4.30
   0  15  -1   14.37    5.30
   0  15   1    6.47    4.13
   1 -15   1    3.53    3.55
  -1 -15  -1    7.93    4.22
  -1  15  -1    8.75    4.52
   1  15   1   10.89    4.83
  -2 -15  -1    1.01    3.57
   2 -15   1   -1.95    3.22
  -2  15  -1   -4.92    3.37
  -2  15  -1    1.35    3.84
  -2  15  -1   -0.19    3.36
   2  15   1    2.96    3.83
  -3 -15  -1   57.24    8.83
  -3 -15  -1   47.99    7.09
   3 -15   1   47.97    6.44
   3  15   1   62.61    7.80
  -3  15  -1   45.20    6.64
  -3  15  -1   40.46    7.10
  -3  15  -1   35.89    6.38
  -4 -15  -1    2.80    3.83
  -4 -15  -1   -5.04    3.53
   4  15   1   -1.23    3.56
  -4  15  -1   -1.48    4.12
  -4  15  -1   -6.66    3.38
  -4  15  -1    1.67    3.54
  -5 -15  -1    0.54    4.35
  -5 -15  -1   -1.72    3.69
  -5  15  -1   -5.27    3.24
  -5  15  -1    0.13    4.00
  -5  15  -1    1.36    4.47
  -6 -15  -1    3.20    4.42
  -6 -15  -1    3.00    4.52
  -6  15  -1   -8.12    3.74
  -6  15  -1   -4.69    3.32
  -6  15  -1    2.12    4.77
  -7 -15  -1    1.23    4.88
  -7 -15  -1    1.18    4.81
  -7  15  -1    3.08    4.44
  -7  15  -1   -1.19    5.22
  -7  15  -1    1.26    4.90
  -8 -15  -1   14.48    6.26
  -8 -15  -1    8.93    5.80
  -8  15  -1   -1.27    5.07
  -8  15  -1   11.50    5.57
  -8  15  -1   11.31    6.01
  -9 -15  -1    5.39    6.00
  -9 -15  -1   -6.94    5.01
  -9  15  -1   -1.72    5.41
  -9  15  -1    0.45    5.08
  -9  15  -1   -4.19    5.46
  -9 -16   1    7.08    5.70
  -9 -16   1    7.99    6.49
  -9  16   1   13.25    6.37
  -9  16   1   23.40    7.30
  -9  16   1    3.73    6.59
  -8 -16   1   24.73    7.56
  -8 -16   1   17.52    6.56
  -8  16   1   21.43    6.46
  -8  16   1   32.92    7.64
  -8  16   1   14.96    6.84
  -7 -16   1   -3.94    4.86
  -7 -16   1    6.18    5.42
  -7  16   1    0.45    4.42
  -7  16   1   -0.19    4.72
  -7  16   1    6.10    5.60
  -7  16   1    2.06    5.52
  -6 -16   1   32.92    7.18
  -6 -16   1   20.88    5.86
  -6  16   1   31.83    7.42
  -6  16   1   27.12    7.01
  -6  16   1   22.01    6.17
  -6  16   1   28.18    6.46
  -5 -16   1   47.38    7.50
  -5 -16   1   61.96    8.44
  -5  16   1   37.41    7.36
  -5  16   1   39.95    7.02
  -5  16   1   55.17    9.00
  -5  16   1   35.14    6.90
  -4 -16   1   15.26    5.24
  -4 -16   1    8.62    4.64
  -4  16   1   10.86    5.24
  -4  16   1   14.79    5.43
  -4  16   1   26.41    6.03
  -3 -16   1   21.38    5.72
  -3  16   1   20.47    5.78
   3  16  -1   13.14    4.85
  -3  16   1   35.62    7.09
  -2 -16   1   14.65    5.17
   2 -16  -1   18.62    5.16
   2  16  -1   18.45    5.58
  -2  16   1   19.96    5.64
  -2  16   1    9.44    5.70
   1 -16  -1    7.44    4.52
  -1 -16   1    2.94    3.96
  -1  16   1    0.17    4.66
   1  16  -1    7.15    4.78
   0 -16   1    3.47    4.19
   0 -16  -1    4.59    4.17
   0  16   1    2.09    4.40
   0  16  -1   10.13    4.99
   1 -16   1   37.50    6.51
  -1 -16  -1   29.31    6.11
  -1  16  -1   33.04    6.98
   1  16   1   32.84    6.85
  -2 -16  -1   22.16    5.88
   2 -16   1   27.51    5.85
  -2  16  -1   33.81    7.42
  -2  16  -1   22.57    6.07
   2  16   1   32.73    6.24
  -3 -16  -1    6.96    4.62
  -3  16  -1    0.47    4.01
  -3  16  -1   10.52    4.91
  -3  16  -1    0.91    4.49
   3  16   1   10.11    4.90
  -3  16  -1    0.23    4.13
  -4 -16  -1    0.82    4.52
  -4  16  -1    2.39    4.05
  -4  16  -1    0.57    4.19
  -4  16  -1   -8.90    3.21
  -5 -16  -1   21.26    6.56
  -5 -16  -1   25.13    6.39
  -5  16  -1   14.33    5.95
  -5  16  -1    9.37    5.33
  -5  16  -1    7.83    4.54
  -6 -16  -1   34.23    7.47
  -6 -16  -1   45.08    8.29
  -6  16  -1   43.00    8.11
  -6  16  -1   36.26    8.30
  -6  16  -1   41.12    7.46
  -7 -16  -1    7.74    5.41
  -7 -16  -1    8.15    5.97
  -7  16  -1    9.69    5.86
  -7  16  -1    6.74    5.44
  -7  16  -1   20.87    6.55
  -8 -16  -1    6.60    6.60
  -8 -16  -1    6.47    5.58
  -8  16  -1    2.05    5.08
  -8  16  -1   -7.48    4.75
  -8  16  -1    6.41    5.53
  -8 -17   1    5.65    6.54
  -8 -17   1    4.99    5.74
  -8  17   1   16.01    7.41
  -8  17   1   22.59    7.31
  -8  17   1    8.25    6.05
  -8  17   1   15.56    6.49
  -7 -17   1   26.95    7.16
  -7 -17   1   44.70    8.85
  -7  17   1   60.04    9.62
  -7  17   1   30.94    7.58
  -7  17   1   32.62    7.80
  -7  17   1   45.54    8.69
  -6 -17   1   23.25    6.93
  -6 -17   1   21.28    6.79
  -6  17   1   18.33    5.79
  -6  17   1    9.38    5.36
  -6  17   1   32.01    7.68
  -6  17   1   15.70    6.79
  -5 -17   1    7.57    5.30
  -5 -17   1   13.83    5.60
  -5  17   1   -0.65    5.29
  -5  17   1    1.27    4.94
  -5  17   1    4.68    4.50
  -5  17   1    1.92    4.46
  -4 -17   1   52.44    8.34
  -4  17   1   53.39    7.94
  -4  17   1   52.93    8.45
  -3 -17   1  185.95   12.61
  -3  17   1  194.21   13.13
   3  17  -1  157.33   11.41
  -3  17   1  178.70   12.60
  -2 -17   1    2.25    4.29
   2 -17  -1    4.66    4.24
   2  17  -1   -4.59    3.86
  -2  17   1   -1.89    4.38
   1 -17  -1   54.74    7.80
  -1 -17   1   59.03    8.24
  -1  17   1   46.38    7.96
   1  17  -1   62.68    8.60
   0 -17  -1  113.77   10.33
   0 -17   1  121.25   10.99
   0  17   1  106.51   10.49
   0  17  -1  116.28   11.13
   1 -17   1   27.70    6.21
  -1 -17  -1   44.06    7.64
   1  17   1   27.74    6.60
  -1  17  -1   31.72    7.27
   2 -17   1    2.88    4.12
  -2 -17  -1    2.52    4.60
   2  17   1   10.57    5.03
  -2  17  -1    4.92    5.39
  -3 -17  -1   33.65    7.31
   3  17   1   22.16    6.31
  -3  17  -1   22.06    5.75
  -3  17  -1   14.81    6.00
  -4 -17  -1   52.92    8.37
  -4  17  -1   41.72    8.16
  -4  17  -1   52.45    8.15
  -4  17  -1   51.42    7.68
  -4  17  -1   57.00    8.33
  -5 -17  -1   19.23    6.61
  -5  17  -1   16.36    5.54
  -5  17  -1   12.17    5.43
  -5  17  -1    1.86    4.76
  -6 -17  -1   13.26    6.08
  -6 -17  -1    5.15    6.01
  -6  17  -1    6.12    5.31
  -6  17  -1   15.94    6.13
  -6  17  -1    6.59    5.58
  -7 -17  -1   35.81    8.01
  -7 -17  -1   45.63    8.53
  -7  17  -1   35.28    7.69
  -7  17  -1   27.01    7.69
  -7  17  -1   48.49    9.23
  -8 -17  -1   11.11    5.68
  -8 -17  -1   11.53    6.84
  -8  17  -1    3.59    6.36
  -8  17  -1    9.13    6.50
  -8  17  -1    3.31    5.24
  -7 -18   1    3.63    5.50
  -7 -18   1    4.35    6.39
  -7  18   1    0.76    5.38
  -7  18   1   -7.63    5.74
  -7  18   1   -6.26    4.58
  -7  18   1   -4.63    4.64
  -6 -18   1    2.92    6.02
  -6 -18   1    1.47    5.32
  -6  18   1    5.27    6.03
  -6  18   1    9.78    6.54
  -6  18   1    0.79    5.52
  -6  18   1    6.53    5.24
  -5 -18   1    0.71    4.68
  -5  18   1   -0.86    5.36
  -5  18   1    5.30    6.27
  -4 -18   1   -0.01    4.51
  -4  18   1    7.11    5.69
  -4  18   1   -5.89    5.07
  -3 -18   1    5.26    5.48
  -3  18   1    3.36    5.07
  -2 -18   1    4.87    4.97
   2  18  -1    2.25    4.94
  -2  18   1    2.89    5.14
  -1 -18   1   13.37    5.53
   1 -18  -1   14.72    5.73
   1  18  -1   14.92    6.33
  -1  18   1   15.26    6.01
   0 -18  -1   52.50    8.29
   0 -18   1   38.10    7.48
   0  18  -1   33.39    7.10
   0  18   1   32.05    7.83
   1 -18   1   18.64    5.89
  -1 -18  -1   16.02    6.13
  -1  18  -1   22.94    6.74
   1  18   1   19.13    6.22
   2 -18   1    5.07    5.27
  -2 -18  -1    7.67    5.55
  -2  18  -1   -3.42    4.90
   2  18   1   18.08    5.93
  -3 -18  -1   15.04    6.65
   3  18   1   24.31    6.70
  -3  18  -1   15.36    5.57
  -3  18  -1   12.88    5.94
  -4 -18  -1    7.07    5.89
  -4  18  -1   -3.05    5.11
  -4  18  -1    2.03    5.27
  -4  18  -1   -7.35    4.26
  -5 -18  -1    5.31    6.63
  -5  18  -1   10.62    5.97
  -5  18  -1    0.69    4.62
  -5  18  -1    2.56    4.54
  -5  18  -1    5.32    5.74
  -6 -18  -1   -4.75    5.58
  -6  18  -1   -1.01    4.79
  -6  18  -1    4.50    5.10
  -6  18  -1    6.87    5.72
  -6  18  -1   -0.99    5.44
  -7 -18  -1    1.30    5.73
  -7 -18  -1    3.29    6.45
  -7  18  -1    6.45    5.42
  -7  18  -1   12.83    6.25
  -7  18  -1   -8.27    5.59
  -6 -19   1    0.13    5.99
  -6  19   1   21.55    7.61
  -6  19   1    3.59    6.25
  -5 -19   1    1.84    5.62
  -5  19   1    2.78    5.86
  -5  19   1    4.79    6.40
  -4 -19   1   81.00   10.87
  -4  19   1   73.17   10.31
  -3 -19   1   99.34   11.14
  -3  19   1   93.43   11.09
  -2 -19   1   12.77    5.92
   2  19  -1   -2.45    5.26
  -2  19   1   17.85    6.41
   1 -19  -1   38.64    7.49
  -1 -19   1   42.53    8.17
   1  19  -1   45.50    8.34
  -1  19   1   42.83    8.11
   0 -19  -1   10.31    5.64
   0 -19   1    6.55    5.83
   0  19   1   15.70    5.94
   0  19  -1   28.10    7.82
   1 -19   1    5.71    5.32
  -1 -19  -1   10.45    5.88
  -1  19  -1    6.00    5.50
   1  19   1    2.01    6.15
  -2 -19  -1   25.50    6.96
  -2  19  -1   12.18    6.33
   2  19   1   30.87    7.52
  -3 -19  -1   35.99    7.98
  -3  19  -1   28.56    7.50
  -4 -19  -1   28.30    7.74
  -4  19  -1   10.47    6.49
  -4  19  -1   16.44    6.11
  -5 -19  -1   20.28    7.50
  -5  19  -1   15.82    6.98
  -5  19  -1   33.20    8.12
  -5  19  -1    6.35    5.87
  -6 -19  -1    5.53    6.49
  -6  19  -1    4.19    5.46
  -6  19  -1   -5.68    5.39
  -6  19  -1   -1.80    5.75
  -6  19  -1    7.91    6.09
  -5 -20   1   46.48    9.66
  -5  20   1   36.71    8.80
  -4 -20   1    0.49    6.68
  -4  20   1    2.89    5.99
  -3 -20   1   13.48    6.54
  -3  20   1    4.70    5.91
  -2 -20   1   52.46    8.86
   2  20  -1   20.78    7.39
  -2  20   1   37.24    8.39
  -1 -20   1   86.16   10.52
   1 -20  -1   98.10   12.36
  -1  20   1   75.84   10.94
   1  20  -1   69.47   10.02
   0 -20  -1   30.70    8.24
   0 -20   1   20.57    6.67
   0  20   1   30.50    7.91
   0  20  -1   26.28    7.41
  -1 -20  -1   -5.17    5.45
   1 -20   1    3.87    5.45
   1  20   1    0.88    5.54
  -1  20  -1   -2.68    5.51
  -2 -20  -1   52.76    9.45
   2  20   1   49.08    9.26
  -2  20  -1   62.98   10.17
  -3 -20  -1   18.19    6.98
  -3  20  -1   15.01    6.95
  -4 -20  -1   20.02    7.84
  -4  20  -1    0.59    6.23
  -5 -20  -1   34.28    9.15
  -5  20  -1   40.98    9.00
  -3 -21   1   11.90    7.15
  -3  21   1    7.39    7.18
  -2 -21   1    5.34    6.17
  -2  21   1   -4.57    6.10
  -1 -21   1   58.40   10.17
  -1  21   1   45.97    9.19
   1  21  -1   51.74    9.58
   0 -21   1    8.41    6.26
   0 -21  -1    6.77    6.31
   0  21   1   12.30    7.39
   0  21  -1    9.36    7.13
  -1 -21  -1   -0.74    5.98
  -1  21  -1   -5.71    5.30
   1  21   1   -2.42    5.46
  -2 -21  -1    9.87    6.67
  -2  21  -1   10.17    7.03
   2  21   1    4.88    6.52
  -3 -21  -1   -1.76    6.19
  -3  21  -1    1.58    6.16
 -12   0   2   13.42    4.93
 -11   0   2   -0.74    3.10
 -10   0   2   55.65    7.06
 -10   0   2   55.49    6.77
  -9   0   2    1.18    2.78
  -9   0   2    0.07    2.81
  -8   0   2   13.48    3.69
  -8   0   2   15.80    3.78
  -7   0   2  408.60   12.35
  -7   0   2  400.50   12.31
  -6   0   2  746.74   17.60
  -6   0   2  771.54   17.72
  -5   0   2   16.17    2.84
  -5   0   2   14.85    2.83
  -4   0   2  329.52    8.64
  -4   0   2  323.82    8.95
  -3   0   2  322.92    8.30
  -3   0   2  321.69    7.81
  -2   0   2   48.81    3.00
  -2   0   2   44.52    2.56
  -1   0   2   70.98    2.16
  -1   0   2   65.82    2.11
  -1   0   2   72.72    2.91
  -1   0   2   69.10    2.42
  -1   0   2   68.46    2.27
   1   0  -2   70.20    2.17
   0   0   2  950.43   17.74
   0   0   2  950.53   16.74
   0   0  -2  959.65   16.73
   0   0  -2  959.62   17.40
   1   0   2 7080.87  120.06
  -1   0  -2 7247.47  122.53
  -1   0  -2 7185.35  116.75
  -1   0  -2 7147.08  120.20
   2   0   2  250.84    6.31
  -2   0  -2  241.37    6.78
  -2   0  -2  236.40    6.41
  -2   0  -2  245.09    6.43
  -2   0  -2  249.26    6.69
  -2   0  -2  242.97    6.40
  -3   0  -2    4.66    1.72
  -3   0  -2    3.96    1.49
  -3   0  -2    5.24    1.99
   3   0   2    2.54    1.41
  -3   0  -2    2.05    1.56
  -3   0  -2    4.58    1.67
  -3   0  -2    5.26    1.67
   4   0   2   37.61    2.67
  -4   0  -2   39.35    4.07
  -4   0  -2   37.14    3.31
  -4   0  -2   46.66    3.44
  -4   0  -2   45.00    3.68
  -4   0  -2   35.78    3.03
  -4   0  -2   42.27    3.16
  -5   0  -2  711.04   15.85
  -5   0  -2  696.98   15.58
  -5   0  -2  670.37   15.27
  -5   0  -2  688.65   16.81
  -5   0  -2  671.04   15.14
  -5   0  -2  707.50   15.30
  -6   0  -2   65.82    4.28
  -6   0  -2   73.90    4.55
  -6   0  -2   66.26    4.24
  -6   0  -2   66.92    4.58
  -6   0  -2   79.23    5.79
  -6   0  -2   68.32    4.32
  -7   0  -2   56.91    4.85
  -7   0  -2   59.12    4.84
  -7   0  -2   62.69    5.12
  -7   0  -2   51.12    4.06
  -7   0  -2   65.36    4.60
  -7   0  -2   76.73    7.29
  -8   0  -2   51.74    4.84
  -8   0  -2   42.26    6.04
  -8   0  -2   41.76    4.33
  -8   0  -2   42.92    4.37
  -8   0  -2   47.29    4.84
  -8   0  -2   37.83    4.30
  -9   0  -2   51.01    5.13
  -9   0  -2   50.73    5.19
  -9   0  -2   52.16    5.34
  -9   0  -2   46.94    6.47
  -9   0  -2   51.45    5.26
 -10   0  -2   73.20    6.33
 -10   0  -2   70.92    6.49
 -10   0  -2   73.45    6.36
 -10   0  -2   77.51    6.99
 -10   0  -2   77.24    8.56
 -11   0  -2  144.96    8.39
 -11   0  -2  145.87    8.54
 -11   0  -2  158.19   13.03
 -11   0  -2  136.69    8.55
 -11   0  -2  161.04    8.85
 -12   0  -2    2.97    3.28
 -12   0  -2    1.69    3.64
 -12   0  -2    1.09    4.35
 -12   0  -2    1.42    3.34
 -13   0  -2   48.59    8.94
 -13   1   2    1.42    4.91
 -12  -1   2    3.12    2.67
 -12  -1   2    2.33    3.99
 -12  -1   2   -1.86    2.47
 -12   1   2   -0.54    4.10
 -11  -1   2    6.76    3.85
 -11   1   2    0.40    3.63
 -10  -1   2   23.91    5.15
 -10  -1   2   30.91    5.27
 -10   1   2   28.03    5.33
 -10   1   2   26.28    5.01
  -9  -1   2   23.38    4.71
  -9  -1   2   19.87    4.11
  -9   1   2   21.56    4.46
  -9   1   2   26.67    4.98
  -8  -1   2   35.12    4.74
  -8  -1   2   33.91    5.16
  -8   1   2   30.43    4.60
  -8   1   2   41.64    5.49
  -7  -1   2   28.95    4.08
  -7  -1   2   24.14    4.06
  -7   1   2   27.89    4.03
  -7   1   2   22.99    4.02
  -6  -1   2    3.25    2.57
  -6  -1   2    5.40    2.35
  -6   1   2    4.41    2.36
  -6   1   2    1.11    2.28
  -5  -1   2  254.82    7.76
  -5  -1   2  254.52    8.41
  -5   1   2  244.16    7.93
  -5   1   2  247.68    8.25
  -4  -1   2   52.06    3.46
  -4  -1   2   58.20    4.51
  -4   1   2   61.13    3.85
  -4   1   2   57.85    3.88
  -3  -1   2    1.39    1.42
  -3  -1   2    2.70    1.68
  -3   1   2    1.05    1.58
  -3   1   2    2.97    1.66
  -2  -1   2   62.06    2.29
  -2  -1   2   58.25    2.48
  -2  -1   2   59.78    3.30
  -2  -1   2   62.65    2.38
  -2   1   2   60.51    3.24
  -2   1   2   64.06    3.15
  -1  -1   2  401.83    7.84
  -1  -1   2  399.48    8.31
  -1  -1   2  390.56    7.86
   1  -1  -2  390.11    7.71
  -1  -1   2  407.15    8.21
  -1  -1   2  402.69    7.91
  -1   1   2  386.80    7.80
  -1   1   2  404.25    8.11
  -1   1   2  405.04    7.69
  -1   1   2  391.35    7.83
  -1   1   2  389.40    8.23
   1   1  -2  394.42    7.78
   0  -1   2    8.06    1.30
   0  -1  -2    5.69    1.11
   0  -1   2    7.33    1.32
   0  -1   2    6.23    1.09
   0   1   2    6.24    1.22
   0   1  -2    5.78    1.29
   0   1   2    4.96    1.17
   0   1  -2    8.09    1.13
   1  -1   2 1496.20   26.64
  -1  -1  -2 1481.25   26.82
  -1  -1  -2 1484.80   26.15
  -1   1  -2 1476.10   26.79
  -1   1  -2 1493.22   26.11
  -1   1  -2 1488.08   27.42
   1   1   2 1502.64   26.74
  -2  -1  -2  122.17    4.37
  -2  -1  -2  119.19    4.66
  -2  -1  -2  121.96    4.56
   2  -1   2  122.59    4.16
  -2  -1  -2  120.15    4.44
  -2  -1  -2  119.51    4.34
  -2   1  -2  115.67    4.30
  -2   1  -2  117.46    4.27
  -2   1  -2  118.57    4.57
   2   1   2  113.35    4.12
  -2   1  -2  126.39    4.61
  -2   1  -2  125.89    4.88
   3  -1   2   16.52    2.02
  -3  -1  -2   17.34    2.32
  -3  -1  -2   19.71    2.46
  -3  -1  -2   21.91    2.81
  -3  -1  -2   21.03    2.51
  -3  -1  -2   17.47    2.36
  -3  -1  -2   15.19    2.00
  -3   1  -2   17.31    2.16
  -3   1  -2   21.33    2.91
  -3   1  -2   18.53    2.23
  -3   1  -2   15.30    2.24
  -3   1  -2   16.02    2.26
   3   1   2   22.27    2.32
  -3   1  -2   15.61    2.41
  -4  -1  -2   74.76    3.91
  -4  -1  -2   66.02    3.81
  -4  -1  -2   72.64    4.08
  -4  -1  -2   68.57    4.68
  -4  -1  -2   59.65    3.67
  -4  -1  -2   63.87    3.97
   4  -1   2   66.78    3.12
  -4   1  -2   60.99    3.92
  -4   1  -2   68.52    3.95
  -4   1  -2   60.87    3.64
   4   1   2   64.40    3.31
  -4   1  -2   62.09    3.89
  -4   1  -2   65.88    5.31
  -4   1  -2   71.51    4.00
  -5  -1  -2   94.17    4.69
  -5  -1  -2   98.73    4.67
  -5  -1  -2   92.45    4.80
  -5  -1  -2   89.67    4.84
  -5  -1  -2   97.77    5.69
  -5  -1  -2   92.50    4.61
   5   1   2   90.61    3.68
  -5   1  -2   94.40    4.83
  -5   1  -2  101.95    4.91
  -5   1  -2  104.55    5.98
  -5   1  -2   91.61    4.57
  -5   1  -2  104.30    4.74
  -5   1  -2  100.94    4.72
  -6  -1  -2   52.66    4.04
  -6  -1  -2   43.41    3.95
  -6  -1  -2   44.80    4.18
  -6  -1  -2   48.88    4.26
  -6  -1  -2   44.10    3.91
  -6  -1  -2   38.14    4.72
  -6   1  -2   48.74    5.56
  -6   1  -2   51.38    4.38
  -6   1  -2   46.58    4.13
  -6   1  -2   50.75    4.25
  -6   1  -2   47.18    4.06
  -6   1  -2   40.83    3.98
  -7  -1  -2    3.97    2.04
  -7  -1  -2    5.83    2.98
  -7  -1  -2    4.35    1.91
  -7  -1  -2   -0.75    2.04
  -7  -1  -2    7.20    2.33
  -7  -1  -2    2.10    1.97
  -7   1  -2    6.38    2.22
  -7   1  -2    6.00    2.26
  -7   1  -2    3.60    1.96
  -7   1  -2    3.40    2.93
  -7   1  -2    5.05    2.27
  -7   1  -2   -1.70    1.98
  -8  -1  -2    7.73    2.81
  -8  -1  -2    6.65    2.62
  -8  -1  -2    6.00    2.43
  -8  -1  -2    7.46    2.61
  -8  -1  -2    9.19    3.85
  -8  -1  -2    8.32    2.59
  -8   1  -2    8.38    2.75
  -8   1  -2    9.63    2.87
  -8   1  -2   13.17    2.87
  -8   1  -2   12.77    4.28
  -8   1  -2    8.84    2.63
  -8   1  -2    3.59    2.33
  -9  -1  -2   90.06    8.67
  -9  -1  -2  106.98    6.60
  -9  -1  -2  100.99    6.52
  -9  -1  -2   89.68    6.19
  -9  -1  -2   98.29    6.28
  -9   1  -2   99.23    6.41
  -9   1  -2   97.59    9.45
  -9   1  -2   89.99    6.24
  -9   1  -2  100.41    6.39
  -9   1  -2  106.91    6.53
 -10  -1  -2   18.22    3.94
 -10  -1  -2   27.91    4.74
 -10  -1  -2   15.59    4.64
 -10  -1  -2   29.17    4.63
 -10  -1  -2   28.58    4.43
 -10   1  -2   10.40    4.78
 -10   1  -2   23.95    4.07
 -10   1  -2   29.61    4.64
 -10   1  -2   25.05    4.21
 -10   1  -2   28.76    4.66
 -11  -1  -2    2.01    3.62
 -11  -1  -2    0.15    3.02
 -11  -1  -2   -0.78    2.75
 -11  -1  -2   -6.87    3.46
 -11  -1  -2    4.96    3.35
 -11   1  -2    1.17    2.88
 -11   1  -2    0.44    3.17
 -11   1  -2    3.86    3.23
 -11   1  -2   -1.00    3.79
 -12  -1  -2    1.06    4.53
 -12  -1  -2   10.67    4.15
 -12  -1  -2   13.40    4.27
 -12  -1  -2   18.52    4.38
 -12   1  -2   10.67    3.88
 -12   1  -2    6.26    3.65
 -12   1  -2    8.81    3.84
 -12   1  -2   10.32    5.41
 -13  -2   2    8.65    3.42
 -13  -2   2   -1.63    2.86
 -13   2   2   -3.12    4.30
 -12  -2   2   11.40    3.48
 -12  -2   2    9.15    2.97
 -12   2   2    0.00    4.23
 -11  -2   2   40.54    4.25
 -11  -2   2   39.76    6.15
 -11  -2   2   36.68    4.05
 -11   2   2   30.60    6.51
 -10  -2   2   53.57    4.43
 -10  -2   2   53.99    6.51
 -10   2   2   60.32    6.63
 -10   2   2   49.92    6.79
  -9  -2   2   36.56    3.52
  -9  -2   2   38.42    5.40
  -9  -2   2   38.29    6.12
  -9   2   2   31.16    5.50
  -9   2   2   38.47    5.08
  -8  -2   2   50.41    5.47
  -8  -2   2   43.44    5.68
  -8  -2   2   42.01    3.30
  -8   2   2   47.15    5.18
  -8   2   2   32.86    5.06
  -7  -2   2  103.94    5.89
  -7  -2   2  100.53    6.59
  -7   2   2  100.92    6.64
  -7   2   2  109.07    5.89
  -6  -2   2  128.82    5.87
  -6  -2   2  117.20    6.55
  -6   2   2  125.00    5.88
  -6   2   2  127.40    6.73
  -5  -2   2  125.23    6.23
  -5  -2   2  129.40    5.32
  -5   2   2  137.58    5.66
  -5   2   2  131.57    6.17
  -4  -2   2  139.54    5.97
  -4  -2   2  138.56    4.86
  -4   2   2  144.13    5.39
  -4   2   2  141.49    5.90
  -3  -2   2    1.55    1.06
  -3  -2   2    1.20    1.00
  -3  -2   2    1.98    1.25
  -3  -2   2    1.66    0.91
  -3  -2   2    2.69    1.89
  -3  -2   2    2.70    0.92
  -3  -2   2    1.74    1.14
  -3   2   2    0.46    1.51
  -3   2   2   -0.50    1.64
  -2  -2   2   21.62    1.37
  -2  -2   2   22.66    1.69
  -2  -2   2   23.21    1.83
  -2  -2   2   21.20    2.45
  -2  -2   2   23.05    1.85
  -2  -2   2   26.48    2.10
  -2  -2   2   21.38    1.94
  -2   2   2   20.67    1.50
  -2   2   2   22.62    1.62
  -2   2   2   24.08    1.86
  -2   2   2   19.64    2.24
  -2   2   2   20.37    1.75
  -2   2   2   23.34    1.76
  -2   2   2   23.13    2.52
  -1  -2   2  122.04    4.05
  -1  -2   2  120.46    3.98
   1  -2  -2  127.40    3.71
  -1  -2   2  119.47    3.80
  -1  -2   2  115.89    3.65
  -1  -2   2  117.88    3.82
   1   2  -2  124.38    3.79
  -1   2   2  125.06    3.84
  -1   2   2  122.45    3.86
  -1   2   2  121.55    3.59
  -1   2   2  124.64    3.79
  -1   2   2  125.93    4.06
   0  -2  -2  666.36   13.04
   0  -2   2  642.89   13.33
   0  -2   2  668.54   12.01
   0  -2   2  648.41   12.97
   0   2   2  664.88   13.34
   0   2   2  679.28   13.06
   0   2  -2  635.60   11.90
   0   2  -2  661.96   13.11
  -1  -2  -2  122.74    4.42
  -1  -2  -2  124.64    4.49
   1  -2   2  122.69    4.26
  -1  -2  -2  116.97    4.16
   1   2   2  120.66    4.34
  -1   2  -2  117.32    4.12
  -1   2  -2  118.38    4.43
   2  -2   2  191.24    5.59
  -2  -2  -2  191.32    5.82
  -2  -2  -2  182.48    5.84
  -2  -2  -2  183.80    5.75
  -2  -2  -2  192.84    6.01
  -2  -2  -2  189.76    5.87
  -2   2  -2  185.11    5.94
  -2   2  -2  185.68    5.89
  -2   2  -2  190.15    5.79
  -2   2  -2  187.67    6.08
   2   2   2  188.67    5.67
  -2   2  -2  191.58    5.67
  -3  -2  -2   24.72    2.81
  -3  -2  -2   30.02    3.23
  -3  -2  -2   31.42    2.91
  -3  -2  -2   26.53    2.75
  -3  -2  -2   31.34    3.14
  -3  -2  -2   34.81    3.16
   3  -2   2   29.09    2.57
   3   2   2   30.45    2.67
  -3   2  -2   28.09    2.72
  -3   2  -2   26.11    2.80
  -3   2  -2   21.59    2.88
  -3   2  -2   29.83    2.84
  -3   2  -2   30.62    2.87
  -3   2  -2   29.38    2.93
  -4  -2  -2   38.97    3.36
  -4  -2  -2   39.89    3.93
  -4  -2  -2   36.92    3.40
  -4  -2  -2   37.72    3.50
  -4  -2  -2   30.04    2.96
   4  -2   2   36.20    2.65
  -4  -2  -2   35.29    3.30
  -4   2  -2   35.55    3.34
  -4   2  -2   38.35    3.21
  -4   2  -2   40.27    4.41
  -4   2  -2   37.61    3.51
   4   2   2   38.75    2.93
  -4   2  -2   33.25    3.31
  -4   2  -2   38.75    3.20
   5  -2   2   22.57    2.23
  -5  -2  -2   24.17    2.97
  -5  -2  -2   21.86    3.04
  -5  -2  -2   17.79    3.23
  -5  -2  -2   23.45    3.14
  -5  -2  -2   18.57    2.68
  -5  -2  -2   24.94    2.96
   5   2   2   24.50    2.47
  -5   2  -2   21.18    2.87
  -5   2  -2   21.75    2.78
  -5   2  -2   25.62    3.07
  -5   2  -2   22.44    3.00
  -5   2  -2   19.98    3.74
  -5   2  -2   25.21    2.99
  -6  -2  -2    1.02    1.76
  -6  -2  -2    5.19    2.24
  -6  -2  -2    6.33    2.01
  -6  -2  -2    5.75    2.56
  -6  -2  -2    6.12    2.21
  -6  -2  -2    4.75    1.94
  -6   2  -2    4.28    1.96
  -6   2  -2    2.97    2.10
  -6   2  -2    1.12    1.71
  -6   2  -2    1.82    1.92
  -6   2  -2    3.29    2.05
  -6   2  -2    3.11    2.74
  -7  -2  -2    1.11    1.96
  -7  -2  -2    0.26    1.71
  -7  -2  -2    1.35    2.11
  -7  -2  -2   -2.89    1.89
  -7  -2  -2   -0.79    1.90
  -7  -2  -2    3.32    2.72
  -7   2  -2    2.53    1.76
  -7   2  -2    3.92    2.24
  -7   2  -2   -3.17    2.46
  -7   2  -2    2.48    2.20
  -7   2  -2    1.15    1.95
  -7   2  -2    0.13    1.96
  -8  -2  -2    1.82    2.47
  -8  -2  -2    1.28    2.76
  -8  -2  -2   -0.09    2.08
  -8  -2  -2    0.72    2.26
  -8  -2  -2   -0.74    1.81
  -8  -2  -2    0.67    2.17
  -8   2  -2    0.52    2.15
  -8   2  -2    3.53    2.29
  -8   2  -2    3.50    2.27
  -8   2  -2    0.80    2.24
  -8   2  -2    2.91    2.41
  -8   2  -2   -0.01    3.01
  -9  -2  -2   -3.27    2.24
  -9  -2  -2    1.63    3.24
  -9  -2  -2    2.16    2.54
  -9  -2  -2    1.38    2.31
  -9  -2  -2    1.77    2.90
  -9   2  -2   -2.17    3.07
  -9   2  -2    3.21    2.55
  -9   2  -2    1.79    2.56
  -9   2  -2    2.08    2.54
  -9   2  -2    2.17    2.47
 -10  -2  -2    1.16    3.60
 -10  -2  -2    0.14    2.64
 -10  -2  -2    3.26    3.12
 -10  -2  -2    3.12    2.94
 -10  -2  -2    5.40    2.88
 -10   2  -2    6.91    4.87
 -10   2  -2   -0.16    2.74
 -10   2  -2    6.15    3.09
 -10   2  -2    3.53    2.66
 -11  -2  -2   45.95    5.73
 -11  -2  -2   51.19    6.31
 -11  -2  -2   41.42    5.95
 -11  -2  -2   33.19    6.33
 -11  -2  -2   57.03    6.66
 -11   2  -2   38.20    7.19
 -11   2  -2   38.78    5.42
 -11   2  -2   48.87    5.82
 -11   2  -2   43.84    5.82
 -11   2  -2   49.69    5.91
 -12  -2  -2   -2.33    3.27
 -12  -2  -2    0.86    4.24
 -12  -2  -2    8.01    3.90
 -12  -2  -2   -1.09    3.35
 -12  -2  -2    2.54    3.68
 -12   2  -2    1.20    3.36
 -12   2  -2    0.89    3.47
 -12   2  -2    2.10    3.24
 -12   2  -2   -1.86    4.80
 -13  -3   2   13.51    4.14
 -13  -3   2   14.46    3.80
 -13   3   2   17.08    6.42
 -12  -3   2  155.87    7.93
 -12  -3   2  150.01    7.63
 -12   3   2  135.22   12.58
 -11  -3   2   37.55    4.26
 -11  -3   2   35.83    4.28
 -11   3   2   23.81    6.01
 -10  -3   2    3.90    2.79
 -10  -3   2    2.12    2.16
 -10  -3   2   -0.57    2.03
 -10  -3   2    4.75    2.32
 -10   3   2    2.75    3.95
  -9  -3   2   69.52    7.48
  -9  -3   2   73.44    6.68
  -9  -3   2   57.35    4.44
  -9  -3   2   59.01    4.29
  -9  -3   2   65.79    4.35
  -9   3   2   64.44    7.52
  -9   3   2   67.65    6.54
  -8  -3   2  128.82    5.27
  -8  -3   2  127.45    8.06
  -8  -3   2  122.31    5.20
  -8  -3   2  122.60    5.09
  -8  -3   2  130.40    6.87
  -8   3   2  127.91    4.97
  -8   3   2  111.64    7.77
  -8   3   2  124.08    6.83
  -7  -3   2   17.90    2.35
  -7  -3   2   21.58    4.36
  -7  -3   2   15.38    3.08
  -7  -3   2   17.16    2.19
  -7  -3   2   18.93    2.36
  -7   3   2   14.73    3.87
  -7   3   2   21.42    3.42
  -6  -3   2   73.82    4.39
  -6  -3   2   71.63    6.01
  -6  -3   2   71.08    3.36
  -6  -3   2   76.11    3.82
  -6  -3   2   70.81    3.33
  -6  -3   2   69.95    3.38
  -6   3   2   78.66    4.60
  -6   3   2   81.34    6.64
  -5  -3   2  555.05   12.06
  -5  -3   2  557.98   11.47
  -5  -3   2  533.87   11.34
  -5  -3   2  534.71   11.44
  -5  -3   2  534.76   11.90
  -5  -3   2  555.64   12.33
  -5  -3   2  544.22   14.35
  -5   3   2  557.64   12.84
  -5   3   2  563.31   14.29
  -4  -3   2  159.84    6.87
  -4  -3   2  183.48    5.33
  -4  -3   2  185.68    5.48
  -4  -3   2  180.25    5.18
  -4  -3   2  171.72    5.37
  -4  -3   2  178.88    5.04
  -4  -3   2  190.79    5.16
  -4   3   2  178.39    5.05
  -4   3   2  185.96    7.00
  -4   3   2  179.82    4.85
  -4   3   2  184.98    6.05
  -3  -3   2   95.84    3.85
  -3  -3   2   99.54    3.72
  -3  -3   2  102.48    3.91
  -3  -3   2   99.27    4.95
  -3  -3   2   95.37    3.52
  -3  -3   2   97.95    3.59
  -3  -3   2  102.27    3.20
  -3   3   2   98.54    3.37
  -3   3   2  101.57    4.25
  -3   3   2  103.75    3.60
  -3   3   2   98.90    3.32
  -3   3   2   98.80    3.64
  -3   3   2  106.58    3.73
  -3   3   2  102.77    4.99
  -2  -3   2  572.63   12.29
  -2  -3   2  575.56   12.31
  -2  -3   2  589.12   12.02
  -2  -3   2  577.70   11.85
  -2  -3   2  579.65   12.00
  -2  -3   2  600.51   12.82
   2  -3  -2  589.78   11.41
  -2   3   2  572.73   12.11
  -2   3   2  597.94   12.14
  -2   3   2  584.95   11.61
  -2   3   2  582.29   12.68
  -2   3   2  594.54   11.83
  -2   3   2  585.91   11.93
   2   3  -2  607.62   11.79
  -2   3   2  578.98   11.76
  -1  -3   2 9660.53  163.40
  -1  -3   2 9811.07  158.62
   1  -3  -2 9775.53  163.16
  -1  -3   2 9862.45  166.61
  -1  -3   2 9393.83  163.73
  -1   3   2 9906.53  163.72
  -1   3   2 9785.03  166.40
   1   3  -2 9879.23  163.33
  -1   3   2 9620.67  163.82
  -1   3   2 9999.00  158.52
  -1   3   2 9714.42  163.32
   0  -3   2   47.17    3.16
   0  -3  -2   50.75    3.22
   0  -3   2   49.15    3.25
   0  -3   2   44.95    2.50
   0   3   2   54.59    3.31
   0   3   2   51.56    3.29
   0   3  -2   54.57    3.41
   0   3  -2   43.90    2.36
   0   3  -2   46.08    3.28
  -1  -3  -2  148.37    5.27
   1  -3   2  161.21    5.22
  -1  -3  -2  158.19    5.40
  -1   3  -2  151.32    4.91
   1   3   2  152.53    5.26
   1   3   2  141.77    5.40
  -1   3  -2  149.93    5.33
  -1   3  -2  146.82    5.35
  -2  -3  -2  320.12    8.52
  -2  -3  -2  325.08    8.41
  -2  -3  -2  328.37    8.52
   2  -3   2  340.70    8.32
  -2  -3  -2  318.15    8.52
  -2  -3  -2  332.13    8.85
   2   3   2  322.19    8.45
  -2   3  -2  326.07    8.68
  -2   3  -2  325.56    8.39
  -2   3  -2  327.24    8.75
  -2   3  -2  323.33    8.46
  -2   3  -2  330.72    8.73
  -3  -3  -2  157.48    5.87
  -3  -3  -2  151.84    5.85
   3  -3   2  149.80    5.12
  -3  -3  -2  141.09    5.52
  -3  -3  -2  153.19    5.61
  -3  -3  -2  151.68    5.71
  -3   3  -2  154.48    5.76
  -3   3  -2  144.05    5.41
  -3   3  -2  161.81    5.86
  -3   3  -2  141.74    5.63
   3   3   2  151.34    5.41
  -3   3  -2  148.24    6.19
  -3   3  -2  156.51    5.55
  -4  -3  -2   54.08    3.93
  -4  -3  -2   60.00    3.88
   4  -3   2   55.31    3.23
  -4  -3  -2   56.33    4.21
  -4  -3  -2   59.16    4.15
  -4  -3  -2   59.67    3.85
  -4  -3  -2   63.75    4.04
  -4   3  -2   63.70    3.89
  -4   3  -2   52.87    3.69
   4   3   2   53.32    3.43
  -4   3  -2   52.58    3.74
  -4   3  -2   54.74    4.05
  -4   3  -2   54.55    4.92
  -4   3  -2   56.08    3.99
  -5  -3  -2  197.86    7.23
  -5  -3  -2  200.45    7.10
  -5  -3  -2  207.56    7.10
   5  -3   2  211.02    5.90
  -5  -3  -2  190.26    7.68
  -5  -3  -2  209.48    7.29
  -5  -3  -2  215.26    7.71
  -5   3  -2  203.74    7.39
  -5   3  -2  207.13    6.92
  -5   3  -2  203.37    7.24
  -5   3  -2  200.37    7.03
  -5   3  -2  190.85    7.18
  -5   3  -2  200.03    8.48
   5   3   2  203.17    6.21
  -6  -3  -2  172.59    7.09
  -6  -3  -2  201.97    7.50
  -6  -3  -2  193.88    7.36
  -6  -3  -2  201.82    7.82
  -6  -3  -2  202.69    8.40
  -6  -3  -2  191.04    7.43
  -6   3  -2  185.27    7.43
  -6   3  -2  197.76    7.48
  -6   3  -2  204.89    7.45
  -6   3  -2  199.85    7.18
  -6   3  -2  196.16    7.24
  -6   3  -2  188.94    8.93
  -7  -3  -2   48.15    4.74
  -7  -3  -2   43.30    4.46
  -7  -3  -2   53.59    5.67
  -7  -3  -2   44.86    4.53
  -7  -3  -2   47.36    4.82
  -7  -3  -2   43.92    4.47
  -7   3  -2   43.67    4.28
  -7   3  -2   51.17    4.68
  -7   3  -2   40.86    4.12
  -7   3  -2   53.10    4.85
  -7   3  -2   43.70    5.82
  -8  -3  -2   28.63    4.06
  -8  -3  -2   24.43    3.68
  -8  -3  -2   26.04    3.86
  -8  -3  -2   39.97    5.33
  -8  -3  -2   21.91    3.79
  -8   3  -2   24.21    5.08
  -8   3  -2   25.70    3.81
  -8   3  -2   24.70    3.70
  -8   3  -2   27.51    3.90
  -8   3  -2   27.58    3.89
  -8   3  -2   20.43    3.70
  -9  -3  -2   78.98    6.75
  -9  -3  -2   94.62    6.60
  -9  -3  -2   83.57    6.17
  -9  -3  -2   79.40    7.75
  -9  -3  -2   91.35    6.71
  -9   3  -2   81.36    8.47
  -9   3  -2   78.62    6.02
  -9   3  -2   93.20    6.51
  -9   3  -2   99.32    6.58
  -9   3  -2   85.93    6.16
 -10  -3  -2  104.68    9.21
 -10  -3  -2  104.72    7.25
 -10  -3  -2  109.06    7.51
 -10  -3  -2  113.93    7.62
 -10  -3  -2   99.61    7.48
 -10   3  -2  106.22   10.60
 -10   3  -2  107.24    7.18
 -10   3  -2   98.91    6.95
 -10   3  -2  108.59    7.31
 -10   3  -2  107.51    7.20
 -11  -3  -2    9.42    3.94
 -11  -3  -2   16.20    4.45
 -11  -3  -2    5.86    3.70
 -11  -3  -2   10.61    3.79
 -11  -3  -2    9.68    4.46
 -11   3  -2   11.43    3.92
 -11   3  -2    9.38    5.41
 -11   3  -2   12.69    3.97
 -11   3  -2    4.69    3.41
 -11   3  -2   17.89    4.34
 -12  -3  -2   13.72    4.66
 -12  -3  -2   20.06    4.80
 -12  -3  -2   15.91    4.69
 -12  -3  -2   12.75    5.34
 -12  -3  -2   19.33    5.03
 -12   3  -2   19.78    4.64
 -12   3  -2   27.87    5.54
 -12   3  -2   20.91    4.78
 -12   3  -2   33.29    7.88
 -13  -4   2    6.73    3.86
 -13  -4   2    1.06    3.26
 -13   4   2   -2.51    2.80
 -13   4   2    3.96    3.30
 -13   4   2   -3.58    4.87
 -12  -4   2    4.57    3.11
 -12  -4   2    5.79    3.20
 -12   4   2    5.48    3.21
 -12   4   2    8.53    3.06
 -12   4   2   10.34    5.57
 -11  -4   2   11.28    3.43
 -11  -4   2   15.02    3.44
 -11   4   2   17.35    3.28
 -11   4   2   17.76    3.47
 -11   4   2   16.00    5.56
 -10  -4   2   15.29    4.02
 -10  -4   2   14.40    3.22
 -10  -4   2    8.97    2.79
 -10  -4   2   14.36    3.16
 -10   4   2   16.42    3.08
 -10   4   2   16.86    2.89
 -10   4   2   15.11    5.14
  -9  -4   2   46.34    5.44
  -9  -4   2   39.96    4.10
  -9  -4   2   40.45    4.05
  -9  -4   2   39.99    4.10
  -9   4   2   39.04    6.22
  -9   4   2   36.12    3.56
  -9   4   2   43.57    5.32
  -9   4   2   41.88    3.85
  -9   4   2   40.66    3.74
  -8  -4   2    0.38    1.92
  -8  -4   2   -1.48    2.16
  -8  -4   2    2.08    1.97
  -8  -4   2    0.20    1.73
  -8  -4   2   -0.97    1.47
  -8  -4   2   -1.78    2.72
  -8   4   2   -1.16    1.54
  -8   4   2    0.85    2.35
  -8   4   2    1.26    1.70
  -8   4   2   -2.71    2.82
  -7  -4   2   42.10    4.23
  -7  -4   2   44.36    3.40
  -7  -4   2   46.28    5.83
  -7  -4   2   45.43    3.50
  -7  -4   2   40.13    3.51
  -7  -4   2   46.38    3.81
  -7  -4   2   45.79    3.99
  -7   4   2   44.84    4.56
  -7   4   2   41.84    3.21
  -7   4   2   42.97    3.16
  -7   4   2   50.81    5.91
  -7   4   2   42.54    3.21
  -6  -4   2   80.23    4.34
  -6  -4   2   75.19    3.91
  -6  -4   2   68.75    4.18
  -6  -4   2   72.60    3.85
  -6  -4   2   69.68    3.75
  -6  -4   2   73.29    6.55
  -6  -4   2   71.69    3.86
  -6   4   2   74.93    3.64
  -6   4   2   67.46    3.42
  -6   4   2   63.55    4.29
  -6   4   2   82.58    6.88
  -6   4   2   75.05    3.55
  -5  -4   2   17.13    2.46
  -5  -4   2   19.85    2.45
  -5  -4   2   18.78    2.29
  -5  -4   2   17.77    2.17
  -5  -4   2   16.13    2.21
  -5  -4   2   11.10    3.14
  -5  -4   2   15.33    2.27
  -5   4   2   19.53    3.42
  -5   4   2   21.30    2.36
  -5   4   2   14.90    2.13
  -5   4   2   16.94    1.99
  -5   4   2   15.88    2.48
  -5   4   2   15.07    1.97
  -5   4   2   13.41    1.92
  -4  -4   2    0.83    1.30
  -4  -4   2    3.34    1.63
  -4  -4   2    0.48    1.18
  -4  -4   2    1.79    1.38
  -4  -4   2    0.91    1.20
  -4  -4   2    1.46    2.11
  -4  -4   2    2.59    1.37
  -4   4   2    1.37    1.47
  -4   4   2    2.40    2.17
  -4   4   2   -0.31    1.21
  -4   4   2    0.15    1.62
  -4   4   2    2.19    1.34
  -4   4   2   -0.21    1.38
  -4   4   2    1.53    1.30
  -3  -4   2  191.78    7.00
  -3  -4   2  192.12    6.11
  -3  -4   2  189.33    5.80
  -3  -4   2  186.61    5.95
  -3  -4   2  185.81    5.83
  -3  -4   2  186.30    4.42
  -3  -4   2  184.78    5.72
  -3   4   2  184.85    5.71
  -3   4   2  191.10    5.77
  -3   4   2  181.57    5.49
  -3   4   2  191.55    5.69
   3   4  -2  191.16    5.31
  -3   4   2  186.86    6.90
  -3   4   2  194.99    5.50
  -3   4   2  187.41    5.78
  -2  -4   2    2.14    1.44
   2  -4  -2    0.15    1.21
  -2  -4   2   -0.27    1.30
  -2  -4   2   -0.17    1.27
  -2  -4   2    0.74    1.50
  -2  -4   2    1.74    1.69
   2   4  -2   -0.04    1.34
  -2   4   2    0.52    1.37
  -2   4   2    4.68    2.03
  -2   4   2    0.02    1.47
  -2   4   2   -0.30    1.31
  -2   4   2    0.77    1.32
  -2   4   2    1.38    1.54
  -2   4   2    1.06    1.26
  -1  -4   2  723.23   15.85
  -1  -4   2  742.38   15.38
  -1  -4   2  752.28   15.51
   1  -4  -2  751.89   15.23
  -1  -4   2  777.67   15.12
   1   4  -2  765.66   15.50
   1   4  -2  757.98   13.01
  -1   4   2  737.31   15.45
  -1   4   2  734.00   15.36
  -1   4   2  759.28   15.82
  -1   4   2  762.29   15.35
   0  -4   2    6.66    2.25
   0  -4   2    6.02    1.88
   0  -4  -2    6.87    2.12
   0  -4   2    7.20    1.57
   0  -4  -2    6.48    1.94
   0   4  -2    6.25    1.91
   0   4  -2    6.42    1.50
   0   4   2    7.45    2.03
   0   4  -2    6.64    1.99
   0   4   2    4.11    1.86
  -1  -4  -2   94.25    4.60
   1  -4   2  108.37    4.59
  -1  -4  -2  101.09    4.77
   1  -4   2  101.63    4.69
  -1   4  -2  102.97    4.82
   1   4   2  105.21    4.82
  -1   4  -2  103.17    4.27
  -1   4  -2  112.75    4.97
  -2  -4  -2   72.72    3.99
   2  -4   2   69.81    3.95
  -2  -4  -2   76.90    4.40
  -2  -4  -2   79.30    4.30
  -2  -4  -2   80.27    4.33
  -2  -4  -2   79.39    4.29
   2   4   2   79.56    4.29
  -2   4  -2   76.34    4.20
  -2   4  -2   72.29    4.35
  -2   4  -2   79.45    4.24
  -2   4  -2   83.95    4.52
  -2   4  -2   79.66    4.39
  -3  -4  -2   40.00    3.54
  -3  -4  -2   51.57    3.75
   3  -4   2   46.65    3.37
  -3  -4  -2   52.77    4.24
  -3  -4  -2   51.43    4.14
  -3  -4  -2   43.79    3.90
   3   4   2   47.77    3.57
  -3   4  -2   49.53    4.03
  -3   4  -2   45.95    4.04
  -3   4  -2   50.77    3.72
  -3   4  -2   48.50    4.29
  -3   4  -2   39.56    3.28
  -4  -4  -2   58.27    4.01
  -4  -4  -2   57.00    4.30
  -4  -4  -2   52.06    4.04
  -4  -4  -2   51.66    3.93
  -4  -4  -2   57.60    4.19
   4  -4   2   52.44    3.35
  -4  -4  -2   51.34    3.91
  -4   4  -2   49.21    4.22
  -4   4  -2   54.77    4.18
  -4   4  -2   59.62    3.90
   4   4   2   58.16    3.78
  -4   4  -2   53.73    4.01
  -4   4  -2   67.42    5.64
  -4   4  -2   54.86    3.94
  -5  -4  -2    4.94    1.86
  -5  -4  -2    3.21    2.01
  -5  -4  -2    6.85    1.95
  -5  -4  -2    5.35    1.86
   5  -4   2    6.55    1.62
  -5  -4  -2    3.32    2.16
  -5  -4  -2    3.70    2.08
   5   4   2    3.23    1.57
  -5   4  -2    4.30    1.90
  -5   4  -2    4.44    1.96
  -5   4  -2    1.34    2.00
  -5   4  -2    3.59    2.78
  -5   4  -2    5.47    2.23
  -5   4  -2    5.11    1.89
  -6  -4  -2   40.46    3.99
  -6  -4  -2   43.95    4.94
  -6  -4  -2   37.83    4.01
  -6  -4  -2   36.69    4.17
  -6  -4  -2   37.35    4.32
  -6  -4  -2   37.33    4.30
  -6   4  -2   36.31    5.07
  -6   4  -2   37.11    3.92
  -6   4  -2   40.88    4.13
  -6   4  -2   39.00    4.28
  -6   4  -2   43.37    4.34
  -6   4  -2   44.24    4.48
  -7  -4  -2   20.30    3.46
  -7  -4  -2   16.90    3.47
  -7  -4  -2   26.31    3.73
  -7  -4  -2   21.99    3.73
  -7  -4  -2   22.76    3.98
  -7  -4  -2   28.44    3.73
  -7   4  -2   29.75    3.97
  -7   4  -2   19.34    3.25
  -7   4  -2   18.96    3.38
  -7   4  -2   23.06    3.52
  -7   4  -2   17.37    4.45
  -7   4  -2   25.85    3.88
  -8  -4  -2   13.54    3.30
  -8  -4  -2    7.19    3.09
  -8  -4  -2    9.09    3.24
  -8  -4  -2   14.96    3.21
  -8  -4  -2   13.58    3.73
  -8   4  -2   11.11    3.02
  -8   4  -2   12.32    3.17
  -8   4  -2   16.10    3.51
  -8   4  -2   10.20    4.41
  -8   4  -2   13.55    3.46
  -9  -4  -2   -0.35    2.25
  -9  -4  -2    4.30    2.67
  -9  -4  -2    2.37    2.62
  -9  -4  -2   -1.32    2.67
  -9  -4  -2   -2.43    2.68
  -9   4  -2   -3.00    3.31
  -9   4  -2    1.01    2.71
  -9   4  -2    1.38    2.74
  -9   4  -2    1.49    2.57
  -9   4  -2    0.83    2.59
 -10  -4  -2   -3.67    2.58
 -10  -4  -2    1.79    3.32
 -10  -4  -2    6.56    2.99
 -10  -4  -2    4.52    3.35
 -10  -4  -2    4.32    3.07
 -10   4  -2    7.68    4.49
 -10   4  -2    2.60    2.86
 -10   4  -2    2.63    3.14
 -10   4  -2    8.14    3.59
 -10   4  -2    2.60    2.99
 -11  -4  -2   10.38    4.17
 -11  -4  -2   21.93    5.21
 -11  -4  -2   19.86    4.45
 -11  -4  -2   16.43    5.16
 -11  -4  -2   15.92    4.46
 -11   4  -2   16.63    4.19
 -11   4  -2   16.00    4.33
 -11   4  -2   17.78    6.23
 -11   4  -2   12.64    4.29
 -11   4  -2   19.68    4.38
 -12  -4  -2   12.42    4.50
 -12  -4  -2   11.11    4.65
 -12  -4  -2   10.00    5.05
 -12  -4  -2   11.91    4.69
 -12  -4  -2    9.11    4.16
 -12   4  -2   11.68    4.74
 -12   4  -2   11.80    4.65
 -12   4  -2   15.55    4.41
 -12   4  -2   14.73    6.26
 -12   4  -2   16.32    4.51
 -12  -5   2   23.70    4.53
 -12  -5   2   23.44    4.66
 -12   5   2   17.41    6.41
 -12   5   2   23.43    4.29
 -12   5   2   18.40    3.81
 -11  -5   2   -1.79    2.50
 -11  -5   2    1.40    2.62
 -11   5   2   -1.85    2.45
 -11   5   2    0.37    4.38
 -11   5   2   -3.33    2.47
 -10  -5   2    3.03    2.79
 -10  -5   2    5.54    2.73
 -10  -5   2    1.35    2.41
 -10   5   2    1.11    2.42
 -10   5   2    5.05    2.65
 -10   5   2   -2.32    4.07
 -10   5   2    4.28    3.02
  -9  -5   2    3.32    2.61
  -9  -5   2    0.62    2.21
  -9  -5   2    3.25    2.36
  -9  -5   2    1.42    2.32
  -9  -5   2    1.64    2.19
  -9  -5   2    2.48    2.27
  -9   5   2    3.92    2.30
  -9   5   2    1.27    2.16
  -9   5   2    0.69    3.61
  -9   5   2    3.98    2.32
  -8  -5   2   75.28    5.14
  -8  -5   2   78.77    4.86
  -8  -5   2   85.32    5.03
  -8  -5   2   74.36    4.93
  -8  -5   2   74.36    5.29
  -8  -5   2   76.10    5.00
  -8   5   2   76.73    4.65
  -8   5   2   70.77    4.58
  -8   5   2   78.76    7.76
  -8   5   2   74.34    5.23
  -8   5   2   72.79    4.72
  -7  -5   2  154.85    6.34
  -7  -5   2  150.58    6.15
  -7  -5   2  159.64    6.67
  -7  -5   2  146.24    6.04
  -7  -5   2  141.56    6.27
  -7  -5   2  141.87    8.44
  -7  -5   2  155.49    6.32
  -7   5   2  158.62    6.56
  -7   5   2  144.27    5.78
  -7   5   2  162.76    5.87
  -7   5   2  143.77    8.47
  -7   5   2  160.22    6.10
  -6  -5   2    0.41    1.47
  -6  -5   2    1.73    1.63
  -6  -5   2   -1.85    1.24
  -6  -5   2   -0.86    1.65
  -6  -5   2    1.60    1.49
  -6  -5   2    3.02    1.69
  -6  -5   2   -0.67    2.52
  -6   5   2   -0.48    2.41
  -6   5   2    1.30    1.49
  -6   5   2    2.67    1.86
  -6   5   2    0.76    1.40
  -6   5   2   -1.74    1.35
  -6   5   2   -1.72    1.50
  -6   5   2   -0.96    1.62
  -5  -5   2   -0.18    1.27
  -5  -5   2   -1.04    1.42
  -5  -5   2    0.19    1.60
  -5  -5   2    0.13    1.35
  -5  -5   2    1.44    2.30
  -5  -5   2    0.44    1.48
  -5  -5   2   -0.49    1.39
  -5   5   2    0.37    1.53
  -5   5   2   -0.34    1.47
  -5   5   2    2.39    1.48
  -5   5   2    0.38    1.22
  -5   5   2   -1.52    1.36
  -5   5   2    0.77    2.32
  -5   5   2   -1.70    1.26
  -4  -5   2    0.85    1.32
  -4  -5   2    2.87    1.54
  -4  -5   2    4.54    1.65
  -4  -5   2    2.48    2.26
  -4  -5   2    3.33    1.80
  -4  -5   2    1.30    1.13
  -4  -5   2    0.88    1.66
  -4   5   2    1.51    1.60
  -4   5   2    2.94    1.53
  -4   5   2    5.38    1.70
   4   5  -2    3.06    1.32
  -4   5   2    3.51    1.53
  -4   5   2    4.17    1.76
  -4   5   2    1.66    1.44
  -4   5   2    5.94    2.59
  -3  -5   2   80.67    4.33
  -3  -5   2   81.18    4.14
  -3  -5   2   70.85    4.00
   3  -5  -2   79.50    3.59
  -3  -5   2   76.36    4.08
  -3  -5   2   83.10    5.00
  -3  -5   2   75.64    4.10
   3   5  -2   80.63    3.92
  -3   5   2   76.08    4.02
  -3   5   2   78.33    4.22
  -3   5   2   80.18    3.91
  -3   5   2   78.25    4.01
  -3   5   2   71.06    3.81
  -3   5   2   76.02    4.22
  -3   5   2   77.63    4.92
  -2  -5   2  358.65    9.66
  -2  -5   2  346.89    9.60
  -2  -5   2  364.67    9.36
  -2  -5   2  356.09    9.16
   2  -5  -2  353.72    8.84
  -2  -5   2  342.05    9.25
  -2   5   2  352.01    9.40
  -2   5   2  351.98    9.15
  -2   5   2  351.88    9.73
  -2   5   2  348.34    9.10
  -2   5   2  342.47    8.60
  -2   5   2  362.51    9.11
   2   5  -2  354.99    9.14
  -1  -5   2   44.48    3.72
  -1  -5   2   39.92    3.55
  -1  -5   2   43.05    3.35
   1  -5  -2   45.08    3.45
  -1  -5   2   46.05    3.64
   1   5  -2   46.26    2.19
  -1   5   2   39.94    3.37
   1   5  -2   53.26    3.80
  -1   5   2   45.71    3.47
  -1   5   2   42.18    3.52
  -1   5   2   53.06    4.23
   0  -5  -2  893.61   18.48
   0  -5   2  901.65   18.46
   0  -5   2  853.53   16.70
   0  -5  -2  884.71   18.92
   0  -5   2  908.23   19.07
   0   5   2  883.05   18.91
   0   5  -2  880.55   18.96
   0   5   2  867.56   18.49
   0   5  -2  893.52   16.63
   0   5  -2  890.70   18.55
  -1  -5  -2   75.21    4.44
   1  -5   2   76.83    4.42
   1  -5   2   77.36    4.31
  -1  -5  -2   85.10    4.68
   1   5   2   75.61    4.53
  -1   5  -2   74.29    4.51
  -1   5  -2   73.18    4.59
  -1   5  -2   77.58    4.00
  -2  -5  -2   89.23    5.01
  -2  -5  -2   87.71    4.81
  -2  -5  -2   89.32    4.46
   2  -5   2   82.45    4.46
  -2  -5  -2   96.32    4.72
  -2   5  -2   92.30    4.76
  -2   5  -2   85.97    4.70
   2   5   2   90.53    4.84
  -2   5  -2   84.57    4.93
  -2   5  -2   87.93    4.76
  -2   5  -2   79.28    4.78
  -3  -5  -2   63.57    4.35
  -3  -5  -2   63.41    4.26
  -3  -5  -2   58.86    4.21
   3  -5   2   65.40    3.94
  -3  -5  -2   69.90    4.66
  -3  -5  -2   64.84    4.14
  -3   5  -2   63.10    5.12
  -3   5  -2   70.03    4.67
  -3   5  -2   63.96    4.49
  -3   5  -2   61.56    4.19
   3   5   2   60.50    4.14
  -3   5  -2   68.21    4.45
   4  -5   2   11.74    2.18
  -4  -5  -2    8.23    2.23
  -4  -5  -2   11.32    2.61
  -4  -5  -2    6.36    1.94
  -4  -5  -2   11.13    2.33
  -4  -5  -2    9.00    2.45
  -4  -5  -2   12.50    2.56
  -4   5  -2    7.88    2.35
  -4   5  -2   13.91    2.69
  -4   5  -2    7.68    2.76
  -4   5  -2   12.35    2.45
  -4   5  -2   10.59    2.73
  -4   5  -2   10.52    2.54
   4   5   2    7.96    2.17
  -5  -5  -2   59.08    4.34
  -5  -5  -2   48.27    4.64
  -5  -5  -2   65.32    5.26
  -5  -5  -2   48.03    4.26
   5  -5   2   49.77    3.40
  -5  -5  -2   52.15    4.79
  -5  -5  -2   57.81    4.45
  -5   5  -2   57.67    4.45
  -5   5  -2   49.57    4.57
  -5   5  -2   54.42    5.62
  -5   5  -2   54.63    4.24
   5   5   2   58.83    3.97
  -5   5  -2   63.18    4.82
  -5   5  -2   57.35    5.05
  -6  -5  -2   70.70    5.00
  -6  -5  -2   60.40    4.70
  -6  -5  -2   70.82    5.26
  -6  -5  -2   79.20    5.53
  -6  -5  -2   60.93    4.64
  -6  -5  -2   62.22    5.45
  -6   5  -2   69.94    5.03
  -6   5  -2   71.83    4.93
  -6   5  -2   73.39    5.38
  -6   5  -2   61.93    6.41
  -6   5  -2   69.45    5.36
  -6   5  -2   63.70    4.82
  -7  -5  -2   81.44    5.65
  -7  -5  -2   76.86    5.91
  -7  -5  -2   64.48    6.24
  -7  -5  -2   66.56    6.14
  -7  -5  -2   66.23    5.91
  -7   5  -2   69.22    5.99
  -7   5  -2   79.27    5.53
  -7   5  -2   69.53    5.41
  -7   5  -2   66.84    5.88
  -7   5  -2   64.70    7.15
  -7   5  -2   75.23    5.47
  -8  -5  -2   -0.09    2.66
  -8  -5  -2    1.28    2.60
  -8  -5  -2    3.54    2.91
  -8  -5  -2    1.21    2.21
  -8  -5  -2   -1.21    1.95
  -8   5  -2    2.94    2.49
  -8   5  -2   -2.13    3.18
  -8   5  -2    0.85    2.47
  -8   5  -2   -0.39    2.45
  -8   5  -2    0.22    2.57
  -9  -5  -2   25.37    4.73
  -9  -5  -2   26.69    4.39
  -9  -5  -2   25.10    4.47
  -9  -5  -2   18.51    4.37
  -9  -5  -2   21.20    4.33
  -9   5  -2   29.48    5.00
  -9   5  -2   25.39    4.57
  -9   5  -2   17.94    4.10
  -9   5  -2   29.95    5.96
  -9   5  -2   26.75    4.39
 -10  -5  -2    1.19    2.76
 -10  -5  -2    0.02    3.00
 -10  -5  -2    0.41    3.32
 -10  -5  -2    2.95    3.11
 -10  -5  -2    1.07    3.52
 -10   5  -2   -0.98    2.95
 -10   5  -2   -6.23    2.57
 -10   5  -2    4.54    3.03
 -10   5  -2    3.53    3.18
 -10   5  -2   -2.05    4.25
 -11  -5  -2    3.87    4.08
 -11  -5  -2    5.20    4.09
 -11  -5  -2    8.32    3.80
 -11  -5  -2    3.55    3.63
 -11  -5  -2   10.51    4.50
 -11   5  -2    1.56    2.93
 -11   5  -2    0.54    3.37
 -11   5  -2   12.27    3.97
 -11   5  -2    1.87    4.53
 -11   5  -2   -0.98    3.37
 -12  -5  -2    2.57    4.21
 -12  -5  -2    2.58    3.48
 -12  -5  -2   -2.28    4.05
 -12   5  -2   -2.29    3.53
 -12   5  -2    4.52    4.20
 -12   5  -2    0.97    3.32
 -12   5  -2   -0.43    5.20
 -12   5  -2    1.02    3.78
 -12  -6   2    8.16    3.85
 -12  -6   2    4.75    3.57
 -12   6   2    8.32    3.46
 -12   6   2    3.86    3.47
 -12   6   2    7.78    5.94
 -11  -6   2   59.41    6.34
 -11  -6   2   70.89    6.56
 -11  -6   2   58.66    6.19
 -11   6   2   50.56    5.40
 -11   6   2   55.58    5.53
 -11   6   2   61.96    8.97
 -10  -6   2  152.25    7.90
 -10  -6   2  173.76    8.25
 -10  -6   2  182.93    8.64
 -10  -6   2  176.75    8.32
 -10   6   2  174.35    7.93
 -10   6   2  160.20   11.28
 -10   6   2  172.81    7.81
 -10   6   2  157.14    7.69
  -9  -6   2   34.11    4.15
  -9  -6   2   30.16    4.02
  -9  -6   2   31.50    4.43
  -9  -6   2   26.90    4.09
  -9   6   2   21.56    5.37
  -9   6   2   33.63    4.08
  -9   6   2   38.78    4.46
  -9   6   2   27.42    3.76
  -8  -6   2    0.52    2.02
  -8  -6   2    2.91    2.39
  -8  -6   2    2.34    2.24
  -8  -6   2    6.10    2.61
  -8  -6   2    3.90    2.43
  -8  -6   2    2.64    2.16
  -8   6   2    3.49    2.34
  -8   6   2    0.96    1.98
  -8   6   2    2.43    2.23
  -8   6   2    5.50    2.44
  -8   6   2    3.27    2.34
  -8   6   2    3.13    3.62
  -8   6   2    4.62    2.37
  -7  -6   2   39.54    4.41
  -7  -6   2   34.92    3.82
  -7  -6   2   37.66    4.00
  -7  -6   2   37.49    4.02
  -7  -6   2   40.80    4.04
  -7  -6   2   32.26    3.92
  -7   6   2   39.10    4.10
  -7   6   2   41.00    3.93
  -7   6   2   31.84    5.12
  -7   6   2   38.70    3.96
  -7   6   2   34.65    3.63
  -7   6   2   35.25    3.81
  -7   6   2   37.16    3.79
  -6  -6   2   51.83    5.81
  -6  -6   2   46.28    3.42
  -6  -6   2   52.22    4.48
  -6  -6   2   58.17    4.29
  -6  -6   2   53.49    4.41
  -6  -6   2   57.70    4.28
  -6  -6   2   52.55    4.83
  -6   6   2   51.87    5.91
  -6   6   2   51.84    4.03
  -6   6   2   53.71    4.56
  -6   6   2   57.04    4.07
  -6   6   2   49.75    3.71
  -6   6   2   52.84    4.45
  -6   6   2   45.97    4.03
  -5  -6   2    0.96    1.80
  -5  -6   2   -1.48    1.55
  -5  -6   2    0.15    1.44
  -5  -6   2    0.71    1.34
  -5  -6   2    1.04    1.42
  -5  -6   2    1.86    2.45
  -5  -6   2    2.03    1.56
   5   6  -2    0.07    1.21
  -5   6   2    2.85    1.64
  -5   6   2   -2.68    2.08
  -5   6   2   -0.70    1.45
  -5   6   2    1.97    1.92
  -5   6   2   -2.39    1.64
  -5   6   2    2.01    1.69
  -5   6   2   -0.88    1.57
  -4  -6   2  401.18    8.42
   4  -6  -2  378.85    8.97
  -4  -6   2  386.53   10.57
  -4  -6   2  391.68   11.03
  -4  -6   2  398.42   10.86
  -4  -6   2  411.63   12.13
  -4  -6   2  402.31   10.52
  -4  -6   2  400.05   10.69
  -4   6   2  399.60   11.91
  -4   6   2  388.71   10.10
  -4   6   2  371.80   10.44
   4   6  -2  386.71    9.73
  -4   6   2  379.33   10.22
  -4   6   2  382.48   10.30
  -4   6   2  379.38    9.52
  -4   6   2  401.88   10.67
  -3  -6   2 3491.39   61.92
  -3  -6   2 3461.15   62.29
  -3  -6   2 3436.64   63.27
  -3  -6   2 3446.47   57.08
  -3  -6   2 3414.65   61.88
  -3  -6   2 3498.40   61.59
   3  -6  -2 3467.85   60.77
   3   6  -2 3527.00   61.38
  -3   6   2 3512.61   62.96
  -3   6   2 3478.70   59.14
  -3   6   2 3545.21   61.59
  -3   6   2 3476.08   61.64
  -3   6   2 3464.44   61.43
  -3   6   2 3501.45   61.88
  -3   6   2 3404.90   62.95
   2  -6  -2    2.63    1.68
  -2  -6   2    2.23    1.69
  -2  -6   2    0.68    1.72
  -2  -6   2    2.01    1.69
  -2  -6   2    6.06    2.27
  -2  -6   2    3.30    1.85
  -2   6   2    2.40    1.67
  -2   6   2    0.03    1.84
  -2   6   2    2.13    1.81
  -2   6   2    1.51    2.15
  -2   6   2    2.08    1.69
   2   6  -2    0.56    1.64
  -2   6   2    0.43    1.99
  -2   6   2    2.01    1.95
  -1  -6   2  171.81    6.50
   1  -6  -2  157.22    6.12
  -1  -6   2  167.05    6.65
  -1   6   2  172.44    6.63
  -1   6   2  177.24    6.78
   1   6  -2  158.65    6.64
  -1   6   2  163.38    6.40
   1   6  -2  181.66    6.61
  -1   6   2  172.15    6.49
   0  -6  -2  108.18    5.25
   0  -6  -2  114.17    5.50
   0  -6   2  101.19    5.19
   0  -6   2  116.99    5.57
   0   6   2  106.04    5.49
   0   6  -2  107.07    5.36
   0   6  -2  106.27    4.26
   0   6   2  101.74    5.40
  -1  -6  -2  350.17   10.11
   1  -6   2  359.77   10.08
  -1  -6  -2  368.64   10.63
   1  -6   2  351.97   10.37
  -1   6  -2  355.20    9.23
  -1   6  -2  361.31   10.55
   1   6   2  362.77   10.29
  -1   6  -2  363.03   10.32
   1   6   2  380.36   10.75
  -2  -6  -2  211.75    7.98
  -2  -6  -2  219.81    7.71
  -2  -6  -2  216.12    7.83
   2  -6   2  226.14    7.57
  -2   6  -2  217.05    7.98
  -2   6  -2  232.51    7.90
  -2   6  -2  225.91    8.04
   2   6   2  219.45    8.10
   2   6   2  231.91    7.92
  -2   6  -2  230.14    7.86
  -2   6  -2  229.62    7.61
  -3  -6  -2   82.00    5.07
  -3  -6  -2   84.44    5.34
   3  -6   2   90.11    4.68
  -3  -6  -2   79.87    5.01
  -3  -6  -2   78.95    4.76
  -3  -6  -2   86.32    4.75
  -3   6  -2   80.60    4.93
   3   6   2   89.82    5.11
  -3   6  -2   93.88    5.18
  -3   6  -2   88.34    5.38
  -3   6  -2   86.39    5.37
  -3   6  -2   86.82    5.29
  -4  -6  -2  387.87   11.14
  -4  -6  -2  370.22   10.56
  -4  -6  -2  380.33   11.18
  -4  -6  -2  356.56   11.03
  -4  -6  -2  380.20   11.65
   4  -6   2  382.84   10.18
  -4   6  -2  365.88   11.10
   4   6   2  373.49   10.59
  -4   6  -2  366.06   11.66
  -4   6  -2  385.80   11.35
  -4   6  -2  381.29   10.91
  -4   6  -2  354.43   11.09
  -4   6  -2  370.25   10.94
  -5  -6  -2   21.20    3.52
  -5  -6  -2   20.87    3.47
  -5  -6  -2   12.62    2.68
   5  -6   2   20.04    2.59
  -5  -6  -2   15.59    2.90
  -5  -6  -2   18.44    3.21
  -5  -6  -2   22.09    3.38
  -5   6  -2   20.55    3.59
  -5   6  -2   17.36    3.26
   5   6   2   22.17    3.11
  -5   6  -2   19.85    3.22
  -5   6  -2   20.05    3.26
  -5   6  -2   19.00    3.84
  -5   6  -2   22.93    3.68
  -6  -6  -2   28.17    3.79
  -6  -6  -2   37.95    4.96
  -6  -6  -2   28.22    3.96
  -6  -6  -2   32.89    4.22
  -6  -6  -2   35.68    4.56
  -6   6  -2   29.32    4.31
  -6   6  -2   35.31    5.39
  -6   6  -2   36.07    4.29
  -6   6  -2   46.83    5.02
  -6   6  -2   29.85    3.92
  -6   6  -2   31.21    4.15
  -7  -6  -2  148.45    7.74
  -7  -6  -2  147.36    8.12
  -7  -6  -2  149.17    7.90
  -7  -6  -2  144.78    7.35
  -7  -6  -2  144.33    7.53
  -7   6  -2  150.06    7.84
  -7   6  -2  154.00    7.57
  -7   6  -2  141.80    9.02
  -7   6  -2  154.78    7.68
  -7   6  -2  156.04    7.96
  -8  -6  -2  282.01   11.21
  -8  -6  -2  272.18   10.76
  -8  -6  -2  281.30   10.73
  -8  -6  -2  257.94   10.87
  -8  -6  -2  300.09   11.56
  -8   6  -2  284.82   10.70
  -8   6  -2  257.86   12.59
  -8   6  -2  248.53   10.42
  -8   6  -2  277.48   10.68
  -8   6  -2  273.72   10.81
  -9  -6  -2   -0.04    2.93
  -9  -6  -2   -2.23    2.75
  -9  -6  -2   -0.95    2.66
  -9  -6  -2    2.88    2.74
  -9  -6  -2    1.77    2.97
  -9   6  -2    3.96    3.14
  -9   6  -2    1.80    3.07
  -9   6  -2    1.14    2.79
  -9   6  -2    1.73    2.93
  -9   6  -2   -1.14    3.56
 -10  -6  -2    1.61    2.95
 -10  -6  -2    4.80    3.86
 -10  -6  -2   10.90    3.98
 -10  -6  -2    7.43    4.10
 -10  -6  -2    8.80    3.62
 -10   6  -2   10.92    3.79
 -10   6  -2    4.18    3.68
 -10   6  -2    7.98    3.70
 -10   6  -2    4.70    4.87
 -10   6  -2    5.39    3.57
 -11  -6  -2   40.37    6.09
 -11  -6  -2   37.04    6.28
 -11  -6  -2   36.04    5.91
 -11   6  -2   36.64    5.77
 -11   6  -2   27.29    5.13
 -11   6  -2   33.54    5.77
 -11   6  -2   28.66    7.34
 -11   6  -2   41.82    6.26
 -12  -6  -2   15.10    5.00
 -12  -6  -2   15.42    4.56
 -12  -6  -2   10.60    4.85
 -12   6  -2   16.55    4.61
 -12   6  -2    7.64    4.49
 -12   6  -2   11.75    6.46
 -12   6  -2    9.07    4.15
 -12   6  -2   13.24    5.07
 -12  -7   2   47.36    6.41
 -12  -7   2   35.82    5.65
 -12   7   2   20.82    4.54
 -12   7   2   18.99    6.91
 -12   7   2   39.06    5.53
 -11  -7   2    8.42    3.77
 -11  -7   2    5.40    3.31
 -11  -7   2    9.22    3.69
 -11  -7   2    4.73    3.41
 -11   7   2   11.49    6.29
 -11   7   2    6.31    3.64
 -11   7   2    1.98    3.01
 -10  -7   2   -0.80    2.63
 -10  -7   2    3.90    2.98
 -10  -7   2    6.10    3.10
 -10  -7   2    9.51    3.43
 -10   7   2    8.82    3.39
 -10   7   2    4.70    3.25
 -10   7   2   -1.04    4.30
 -10   7   2    9.16    3.43
  -9  -7   2  114.82    7.05
  -9  -7   2  101.42    6.82
  -9  -7   2  117.29    6.80
  -9  -7   2  114.03    6.99
  -9   7   2  101.53    9.95
  -9   7   2  107.04    6.49
  -9   7   2  109.70    6.29
  -9   7   2  121.14    6.83
  -9   7   2  105.11    6.68
  -8  -7   2  188.19    8.06
  -8  -7   2  194.71    8.71
  -8  -7   2  200.81    8.31
  -8  -7   2  187.10    8.30
  -8   7   2  197.87    7.91
  -8   7   2  172.53    7.72
  -8   7   2  190.62   10.68
  -8   7   2  198.17    8.04
  -8   7   2  198.67    8.09
  -8   7   2  196.61    7.79
  -7  -7   2  432.12   13.16
  -7  -7   2  428.59   13.07
  -7  -7   2  440.92   12.61
  -7  -7   2  456.08   12.83
  -7  -7   2  429.81   11.20
  -7  -7   2  443.18   12.50
  -7   7   2  428.53   11.48
  -7   7   2  465.12   12.19
  -7   7   2  419.91   15.07
  -7   7   2  454.47   12.37
  -7   7   2  428.70   12.19
  -7   7   2  417.40   12.09
  -7   7   2  400.80   12.14
  -6  -7   2    4.45    2.23
  -6  -7   2    8.76    2.36
  -6  -7   2    6.75    2.52
  -6  -7   2    7.88    1.91
  -6  -7   2    8.15    2.73
  -6  -7   2    4.76    2.08
  -6   7   2    9.42    2.70
  -6   7   2    6.49    3.44
  -6   7   2    5.67    2.06
  -6   7   2    5.39    2.15
  -6   7   2    5.67    1.98
  -6   7   2   10.95    2.67
  -6   7   2    9.41    2.21
  -5  -7   2   55.42    4.34
  -5  -7   2   59.61    4.43
  -5  -7   2   46.25    4.50
  -5  -7   2   67.91    3.31
  -5  -7   2   61.29    4.45
  -5  -7   2   61.98    4.59
  -5   7   2   57.73    4.36
  -5   7   2   64.23    4.69
  -5   7   2   54.69    3.70
  -5   7   2   59.15    4.59
   5   7  -2   60.01    3.71
  -5   7   2   54.04    4.12
  -5   7   2   57.50    4.26
  -5   7   2   51.96    5.61
  -4  -7   2    4.83    1.23
   4  -7  -2    2.05    1.57
  -4  -7   2    0.18    1.73
  -4  -7   2    3.60    1.84
  -4  -7   2    4.01    1.76
  -4  -7   2    1.61    1.59
  -4  -7   2    1.77    2.02
  -4   7   2    0.83    1.43
  -4   7   2    2.52    2.06
  -4   7   2    2.25    1.62
  -4   7   2    4.06    2.25
   4   7  -2    3.45    1.89
  -4   7   2    3.08    2.64
  -4   7   2    1.60    1.70
  -4   7   2    7.12    2.09
  -3  -7   2  545.35   13.82
  -3  -7   2  559.57   14.25
  -3  -7   2  538.64   13.66
  -3  -7   2  517.18   13.40
   3  -7  -2  533.62   12.73
  -3  -7   2  534.35   10.43
  -3   7   2  530.88   14.14
  -3   7   2  537.97   13.62
  -3   7   2  520.54   13.78
   3   7  -2  542.09   13.32
  -3   7   2  546.37   12.31
  -3   7   2  513.30   13.35
  -3   7   2  560.10   13.49
  -3   7   2  548.84   13.95
  -2  -7   2  161.61    6.35
  -2  -7   2  157.94    6.63
  -2  -7   2  149.71    6.74
  -2  -7   2  164.39    6.76
   2  -7  -2  160.26    6.27
  -2   7   2  165.44    6.77
  -2   7   2  143.75    6.55
  -2   7   2  161.52    6.85
  -2   7   2  170.19    6.53
   2   7  -2  162.67    6.60
  -2   7   2  150.29    6.55
  -2   7   2  154.64    6.47
  -1  -7   2    4.00    1.98
  -1  -7   2    5.89    2.32
   1  -7  -2    4.28    2.03
   1   7  -2    7.70    2.78
   1   7  -2    6.90    2.40
  -1   7   2    6.96    2.39
  -1   7   2    4.54    2.19
  -1   7   2    4.86    2.23
  -1   7   2    6.19    2.14
   0  -7  -2   46.73    4.54
   0  -7   2   44.34    4.10
   0  -7   2   30.67    3.79
   0  -7  -2   56.21    5.38
   0   7  -2   47.14    4.49
   0   7   2   50.46    5.20
   0   7  -2   47.29    3.33
   0   7   2   34.72    3.77
   0   7  -2   49.49    4.79
   1  -7   2    7.72    2.27
  -1  -7  -2    6.82    2.24
   1  -7   2    8.86    2.37
  -1  -7  -2    4.99    2.12
  -1   7  -2   19.34    2.82
   1   7   2   10.19    2.76
  -1   7  -2    9.05    2.61
  -1   7  -2    6.37    2.56
   1   7   2    9.51    2.60
  -2  -7  -2  186.24    7.70
  -2  -7  -2  163.10    7.08
   2  -7   2  160.01    6.62
  -2   7  -2  173.11    7.08
   2   7   2  170.91    7.22
  -2   7  -2  168.02    7.32
   2   7   2  166.61    7.43
  -2   7  -2  179.16    6.95
  -2   7  -2  168.97    7.35
  -3  -7  -2   20.31    3.39
  -3  -7  -2   24.46    3.21
   3  -7   2   23.25    3.19
  -3  -7  -2   25.64    3.44
  -3  -7  -2   22.33    3.51
  -3  -7  -2   24.24    3.22
  -3   7  -2   23.06    3.33
   3   7   2   23.76    3.44
  -3   7  -2   24.48    3.70
  -3   7  -2   22.96    3.39
  -3   7  -2   19.37    3.44
  -3   7  -2   22.38    3.22
  -4  -7  -2  316.77    9.65
  -4  -7  -2  301.83   10.74
   4  -7   2  305.79    9.28
  -4  -7  -2  306.68   10.32
  -4  -7  -2  302.44   10.33
  -4  -7  -2  300.83   10.07
  -4   7  -2  296.54   10.25
  -4   7  -2  312.57   10.20
   4   7   2  322.74    9.91
  -4   7  -2  312.64   10.53
  -4   7  -2  326.81   10.29
  -4   7  -2  303.72   10.70
  -4   7  -2  318.80   10.90
  -5  -7  -2   68.48    5.06
  -5  -7  -2   87.44    6.18
  -5  -7  -2   77.08    5.38
   5  -7   2   71.38    4.35
  -5  -7  -2   77.42    5.59
  -5  -7  -2   72.75    5.56
  -5   7  -2   75.41    5.50
  -5   7  -2   72.11    5.37
   5   7   2   75.48    4.98
  -5   7  -2   74.31    6.74
  -5   7  -2   79.13    5.82
  -5   7  -2   82.51    5.56
  -5   7  -2   70.60    6.19
  -6  -7  -2    4.27    2.77
  -6  -7  -2    3.83    2.02
  -6  -7  -2    1.02    2.05
  -6  -7  -2    5.50    2.83
  -6  -7  -2    4.75    2.48
  -6   7  -2    4.27    2.49
  -6   7  -2   -0.17    2.26
  -6   7  -2    1.01    2.88
  -6   7  -2    4.95    2.57
  -6   7  -2    0.94    2.64
  -7  -7  -2   93.02    6.53
  -7  -7  -2   92.38    6.90
  -7  -7  -2   98.77    7.18
  -7  -7  -2   87.39    6.30
  -7  -7  -2  105.73    6.60
  -7   7  -2   88.56    6.37
  -7   7  -2   75.13    7.82
  -7   7  -2  101.39    6.61
  -7   7  -2   95.26    7.04
  -7   7  -2  100.65    6.82
  -8  -7  -2    1.60    2.73
  -8  -7  -2    1.80    2.97
  -8  -7  -2    2.02    2.93
  -8  -7  -2    0.39    2.48
  -8  -7  -2    0.82    2.45
  -8   7  -2   -1.90    2.66
  -8   7  -2   -6.44    2.18
  -8   7  -2    0.08    3.00
  -8   7  -2   -2.36    3.41
  -8   7  -2    0.62    2.49
  -9  -7  -2   -3.42    3.25
  -9  -7  -2   -1.31    2.94
  -9  -7  -2    1.45    3.40
  -9  -7  -2    1.41    2.79
  -9  -7  -2    2.76    2.95
  -9   7  -2    7.74    3.68
  -9   7  -2    0.00    3.75
  -9   7  -2    4.82    3.08
  -9   7  -2    4.91    3.40
  -9   7  -2    0.73    2.92
 -10  -7  -2    1.78    3.00
 -10  -7  -2   -0.01    3.56
 -10  -7  -2    0.01    3.67
 -10  -7  -2    1.26    3.27
 -10   7  -2   -2.07    3.35
 -10   7  -2   -0.94    3.53
 -10   7  -2    3.98    3.61
 -10   7  -2   -2.41    2.84
 -10   7  -2    1.05    4.47
 -11  -7  -2   -1.20    3.06
 -11  -7  -2    2.85    3.95
 -11  -7  -2    4.55    4.27
 -11   7  -2    7.31    3.77
 -11   7  -2   -3.31    3.31
 -11   7  -2    1.85    5.19
 -11   7  -2    6.03    4.36
 -11   7  -2    1.82    3.98
 -12  -7  -2    2.71    4.94
 -12  -7  -2    4.76    4.58
 -12  -7  -2    1.12    3.86
 -12   7  -2    5.68    4.38
 -12   7  -2    4.07    3.95
 -12   7  -2   12.51    6.33
 -12   7  -2   -0.09    3.23
 -12  -8   2   -1.28    3.68
 -12  -8   2   -0.05    3.54
 -12  -8   2   -0.02    3.48
 -12   8   2    5.70    3.79
 -12   8   2    4.28    5.37
 -12   8   2   -1.44    3.30
 -11  -8   2    7.32    4.05
 -11  -8   2    9.50    4.06
 -11  -8   2    6.00    3.56
 -11  -8   2    9.09    4.19
 -11   8   2    2.35    4.73
 -11   8   2   11.08    3.88
 -11   8   2    9.71    3.74
 -10  -8   2   -3.38    2.81
 -10  -8   2    3.89    3.56
 -10  -8   2    4.86    3.35
 -10  -8   2    2.12    2.87
 -10   8   2    0.35    4.61
 -10   8   2    2.09    2.92
 -10   8   2    6.04    3.13
 -10   8   2    4.72    3.12
 -10   8   2    1.92    2.68
  -9  -8   2    6.81    3.22
  -9  -8   2   -0.58    2.45
  -9  -8   2    3.27    2.86
  -9  -8   2    8.40    3.47
  -9   8   2   -0.52    3.75
  -9   8   2    4.34    2.85
  -9   8   2    2.94    2.98
  -9   8   2    4.94    3.00
  -9   8   2    0.41    2.82
  -8  -8   2   -2.69    2.19
  -8  -8   2    0.26    2.73
  -8  -8   2   -1.98    2.25
  -8  -8   2    4.87    2.54
  -8   8   2    1.85    2.34
  -8   8   2    0.81    2.46
  -8   8   2    2.80    2.56
  -8   8   2    0.09    3.73
  -8   8   2    3.86    2.68
  -7  -8   2    8.26    2.99
  -7  -8   2    5.88    2.75
  -7  -8   2    9.04    2.93
  -7  -8   2    4.49    2.52
  -7   8   2    6.81    3.92
  -7   8   2    5.18    2.69
  -7   8   2    5.16    2.82
  -7   8   2    8.97    2.90
  -7   8   2    9.95    2.95
  -7   8   2    3.45    2.53
  -6  -8   2   85.02    5.55
  -6  -8   2   87.84    4.22
  -6  -8   2   83.34    5.87
  -6  -8   2   86.57    5.82
  -6  -8   2   87.94    6.17
  -6   8   2   87.82    5.41
  -6   8   2   76.73    7.75
  -6   8   2   76.99    5.51
  -6   8   2   89.74    5.61
  -6   8   2   82.91    4.59
  -6   8   2   85.44    5.75
  -6   8   2   87.59    5.84
  -5  -8   2   15.73    2.87
  -5  -8   2   21.92    3.49
  -5  -8   2   14.95    3.02
  -5  -8   2   22.89    2.41
  -5  -8   2   19.56    3.50
  -5  -8   2   11.28    2.77
  -5   8   2   20.55    3.50
  -5   8   2   17.31    3.44
  -5   8   2   13.80    2.84
  -5   8   2   18.64    2.65
  -5   8   2   17.37    2.93
  -5   8   2   16.77    3.37
  -5   8   2   18.63    4.22
   4  -8  -2   85.30    4.54
  -4  -8   2   76.93    4.96
  -4  -8   2   85.39    5.34
  -4  -8   2   80.91    5.18
  -4  -8   2   73.23    5.14
  -4  -8   2   73.10    3.11
  -4  -8   2   82.78    5.51
  -4   8   2   74.39    4.94
  -4   8   2   80.79    5.35
  -4   8   2   73.02    4.93
  -4   8   2   86.40    7.09
  -4   8   2   71.63    5.28
  -4   8   2   83.33    5.20
   4   8  -2   79.84    4.91
  -4   8   2   82.27    4.26
  -3  -8   2   13.97    2.70
   3  -8  -2   12.67    2.57
  -3  -8   2   11.18    1.57
  -3  -8   2    8.47    2.67
  -3  -8   2    4.70    2.44
  -3  -8   2   13.52    2.61
  -3   8   2   13.22    2.70
  -3   8   2    9.12    2.39
  -3   8   2   10.73    3.11
   3   8  -2   17.58    3.11
  -3   8   2   10.90    2.22
  -3   8   2   10.55    2.99
  -3   8   2   10.38    3.10
  -2  -8   2   29.93    3.68
  -2  -8   2   40.14    4.36
  -2  -8   2   34.67    3.94
  -2  -8   2   39.64    4.31
   2  -8  -2   37.14    3.83
  -2   8   2   30.18    3.78
   2   8  -2   32.41    4.10
  -2   8   2   33.24    4.12
  -2   8   2   36.92    4.50
  -2   8   2   32.02    3.77
  -2   8   2   36.66    4.24
  -2   8   2   31.94    3.94
  -1  -8   2   24.87    3.43
  -1  -8   2   20.84    3.27
   1  -8  -2   20.43    3.13
   1  -8  -2   17.88    3.06
  -1   8   2   22.19    3.67
  -1   8   2   26.03    3.97
   1   8  -2   21.86    3.42
  -1   8   2   19.24    3.26
   1   8  -2   29.77    3.92
   1   8  -2   24.31    3.68
   0  -8   2    2.29    2.09
   0  -8  -2    5.28    2.35
   0  -8   2    4.48    2.26
   0  -8  -2    7.59    2.55
   0   8  -2    5.32    2.70
   0   8  -2    4.73    2.01
   0   8   2    4.40    2.15
   0   8   2    5.26    2.49
   0   8  -2    3.28    2.18
   1  -8   2  172.55    7.31
   1  -8   2  179.03    7.70
  -1  -8  -2  175.79    7.51
  -1   8  -2  179.61    6.76
   1   8   2  183.07    7.75
  -1   8  -2  173.33    7.62
   1   8   2  174.25    7.82
   2  -8   2  394.51   11.44
  -2  -8  -2  366.87   11.56
  -2  -8  -2  385.44   11.77
  -2  -8  -2  394.03   12.26
   2  -8   2  357.15   11.77
  -2   8  -2  384.92   11.56
  -2   8  -2  387.48   12.08
  -2   8  -2  386.57   11.74
   2   8   2  398.20   12.32
  -2   8  -2  379.78   11.87
   2   8   2  393.64   11.80
  -2   8  -2  386.63   11.14
  -3  -8  -2   39.43    4.10
  -3  -8  -2   40.14    4.64
  -3  -8  -2   38.40    4.17
  -3  -8  -2   36.86    4.64
  -3  -8  -2   41.72    4.74
   3  -8   2   46.34    4.42
   3   8   2   34.47    4.29
  -3   8  -2   43.13    4.83
  -3   8  -2   36.20    4.20
  -3   8  -2   31.39    4.41
  -3   8  -2   44.47    4.99
  -3   8  -2   38.28    4.54
  -4  -8  -2   80.53    5.90
  -4  -8  -2   82.93    6.21
  -4  -8  -2   84.17    5.11
  -4  -8  -2   79.88    5.49
  -4  -8  -2   89.30    5.98
   4  -8   2   70.84    4.78
  -4   8  -2   97.04    6.31
  -4   8  -2   86.57    7.15
  -4   8  -2   80.44    5.75
  -4   8  -2   88.13    6.18
   4   8   2   82.31    5.60
  -4   8  -2   88.47    5.84
  -5  -8  -2  139.72    6.66
  -5  -8  -2  137.54    7.32
   5  -8   2  133.83    6.10
  -5  -8  -2  142.88    7.59
  -5  -8  -2  136.22    7.81
  -5  -8  -2  121.55    6.87
   5   8   2  128.52    6.63
  -5   8  -2  128.90    7.51
  -5   8  -2  148.10    7.46
  -5   8  -2  148.16    7.42
  -5   8  -2  149.25    8.39
  -5   8  -2  127.37    7.46
  -6  -8  -2   -3.82    1.69
  -6  -8  -2    0.39    2.60
  -6  -8  -2    1.18    1.98
  -6  -8  -2   -2.91    2.28
  -6  -8  -2    1.10    2.32
  -6   8  -2    2.54    2.84
  -6   8  -2    2.24    2.51
  -6   8  -2    1.48    2.73
  -6   8  -2    3.64    3.27
  -6   8  -2   -0.50    2.00
  -7  -8  -2  115.50    7.42
  -7  -8  -2  117.05    6.93
  -7  -8  -2   98.20    7.37
  -7  -8  -2   90.65    6.53
  -7  -8  -2  104.34    7.67
  -7   8  -2   92.43    7.17
  -7   8  -2  100.08    9.44
  -7   8  -2  108.52    7.60
  -7   8  -2  102.71    7.14
  -7   8  -2  103.51    7.12
  -8  -8  -2    5.94    3.64
  -8  -8  -2    8.76    3.50
  -8  -8  -2   10.44    3.49
  -8  -8  -2    2.06    3.49
  -8  -8  -2    6.00    3.64
  -8   8  -2    8.87    3.71
  -8   8  -2    9.03    3.51
  -8   8  -2   15.09    5.64
  -8   8  -2    8.53    3.24
  -8   8  -2   10.55    3.98
  -9  -8  -2    5.65    4.07
  -9  -8  -2    3.42    3.14
  -9  -8  -2    6.61    3.48
  -9  -8  -2    3.99    4.20
  -9   8  -2   10.07    5.16
  -9   8  -2    4.12    3.73
  -9   8  -2    8.07    3.77
  -9   8  -2    4.80    3.15
  -9   8  -2    6.76    3.85
 -10  -8  -2   33.43    6.46
 -10  -8  -2   45.83    7.11
 -10  -8  -2   39.02    5.72
 -10   8  -2   33.91    6.04
 -10   8  -2   34.75    5.56
 -10   8  -2   53.16    7.00
 -10   8  -2   41.93    7.93
 -10   8  -2   41.13    6.22
 -11  -8  -2   19.65    6.09
 -11  -8  -2   10.02    4.93
 -11  -8  -2   15.69    4.11
 -11   8  -2   15.55    6.29
 -11   8  -2    5.89    4.64
 -11   8  -2   13.36    4.86
 -11   8  -2   20.90    5.31
 -12  -8  -2    5.71    4.95
 -12  -8  -2   -1.98    4.02
 -12   8  -2    6.96    5.02
 -12   8  -2   -0.46    3.91
 -12   8  -2   -1.06    5.80
 -12   8  -2    1.27    3.75
 -12  -9   2   25.50    5.86
 -12  -9   2   17.10    4.90
 -12   9   2   23.70    5.28
 -12   9   2   31.74    5.57
 -12   9   2   25.02    7.16
 -11  -9   2   22.79    5.14
 -11  -9   2   11.05    4.35
 -11  -9   2   12.29    4.58
 -11  -9   2    9.47    4.02
 -11   9   2   10.53    5.96
 -11   9   2    4.63    3.39
 -11   9   2    7.07    3.66
 -11   9   2   10.61    4.30
 -10  -9   2    2.58    3.54
 -10  -9   2    9.48    4.29
 -10  -9   2   16.24    4.64
 -10  -9   2    9.02    3.59
 -10   9   2    7.35    3.61
 -10   9   2   10.08    3.66
 -10   9   2   15.01    4.26
 -10   9   2   13.40    4.06
 -10   9   2    6.03    5.26
  -9  -9   2  154.77    9.00
  -9  -9   2  154.31    8.53
  -9  -9   2  151.84    9.10
  -9  -9   2  161.16    8.95
  -9   9   2  148.94    8.38
  -9   9   2  157.48    8.33
  -9   9   2  148.10    8.35
  -9   9   2  177.41    8.90
  -9   9   2  153.21   11.16
  -8  -9   2   76.15    7.27
  -8  -9   2   82.81    6.42
  -8  -9   2   90.75    7.67
  -8  -9   2   69.26    6.57
  -8   9   2   81.57    7.07
  -8   9   2   91.81    9.52
  -8   9   2   77.07    6.74
  -8   9   2   86.07    6.63
  -8   9   2   80.70    6.37
  -7  -9   2   -2.79    2.22
  -7  -9   2    0.00    2.57
  -7  -9   2    0.82    2.16
  -7  -9   2    0.51    2.24
  -7   9   2   -1.17    2.25
  -7   9   2   -1.33    2.35
  -7   9   2   -4.05    2.88
  -7   9   2   -1.93    2.38
  -7   9   2    1.95    2.68
  -6  -9   2   55.44    5.55
  -6  -9   2   57.25    5.43
  -6  -9   2   58.51    5.87
  -6  -9   2   62.92    5.87
  -6   9   2   56.10    6.82
  -6   9   2   71.96    6.40
  -6   9   2   59.00    5.27
  -6   9   2   70.55    6.22
  -6   9   2   55.32    4.08
  -6   9   2   66.68    6.15
  -5  -9   2   83.22    6.00
  -5  -9   2   73.19    5.31
  -5  -9   2   76.46    5.93
  -5  -9   2   77.10    5.85
  -5  -9   2   77.35    3.56
  -5   9   2   71.71    7.19
  -5   9   2   64.71    6.03
  -5   9   2   77.13    5.64
  -5   9   2   67.71    5.94
  -5   9   2   79.86    4.37
  -5   9   2   83.08    5.59
  -4  -9   2   28.09    3.67
  -4  -9   2   26.72    4.04
  -4  -9   2   33.14    4.30
  -4  -9   2   30.20    2.49
   4  -9  -2   34.67    3.74
  -4  -9   2   28.92    4.04
  -4   9   2   30.68    3.36
  -4   9   2   30.52    3.93
  -4   9   2   29.39    4.15
   4   9  -2   35.14    4.28
  -4   9   2   27.32    3.79
  -4   9   2   29.70    4.61
  -4   9   2   29.15    4.26
  -4   9   2   23.41    3.54
   3  -9  -2    0.55    1.90
  -3  -9   2    2.51    2.17
  -3  -9   2   -0.62    2.29
  -3  -9   2   -0.95    1.07
  -3  -9   2    0.39    2.10
  -3  -9   2    1.47    1.96
   3   9  -2    2.21    2.40
  -3   9   2    1.80    2.10
  -3   9   2    2.23    1.79
  -3   9   2    2.89    2.58
  -3   9   2    5.32    2.45
  -3   9   2    1.47    2.16
  -3   9   2    0.37    1.71
  -2  -9   2    1.27    2.05
  -2  -9   2    4.41    2.37
   2  -9  -2    3.79    2.30
  -2  -9   2    4.44    1.75
  -2  -9   2    6.24    2.41
  -2   9   2    3.45    2.36
  -2   9   2    5.02    2.48
  -2   9   2    3.97    2.30
   2   9  -2    8.00    2.74
  -2   9   2    3.03    2.12
  -2   9   2    4.58    2.83
  -2   9   2    5.67    2.69
   2   9  -2    5.79    2.67
   1  -9  -2  511.44   14.64
  -1  -9   2  503.03   14.70
   1  -9  -2  506.07   13.96
  -1  -9   2  515.54   14.36
   1   9  -2  514.77   14.27
   1   9  -2  510.46   14.89
  -1   9   2  514.91   14.55
  -1   9   2  499.42   14.15
   1   9  -2  521.96   14.44
   0  -9   2  214.37    8.86
   0  -9  -2  200.44    8.34
   0  -9   2  199.96    8.29
   0   9   2  214.36    8.98
   0   9   2  208.72    8.72
   0   9  -2  212.72    8.78
   0   9  -2  216.87    9.00
   0   9  -2  207.80    7.06
   1  -9   2    0.82    1.96
  -1  -9  -2   -1.72    1.86
   1  -9   2    1.60    2.03
  -1  -9  -2    0.38    2.15
  -1   9  -2    4.36    2.84
  -1   9  -2   -0.29    2.22
  -1   9  -2    2.93    2.03
   1   9   2   -2.85    1.99
   1   9   2   -2.02    2.04
   2  -9   2  522.07   15.19
  -2  -9  -2  525.20   15.34
   2  -9   2  501.02   14.16
  -2  -9  -2  522.71   14.81
   2   9   2  525.21   14.76
  -2   9  -2  534.78   13.90
   2   9   2  510.44   15.27
  -2   9  -2  509.66   15.06
  -2   9  -2  527.20   14.96
  -2   9  -2  508.23   14.56
  -3  -9  -2  260.96   10.53
  -3  -9  -2  280.12   10.12
   3  -9   2  264.66    9.37
  -3  -9  -2  269.77    9.03
  -3  -9  -2  267.57   10.21
  -3  -9  -2  258.41   10.13
  -3   9  -2  284.80   10.16
  -3   9  -2  266.71    9.93
  -3   9  -2  279.31   10.55
  -3   9  -2  285.22   10.28
  -3   9  -2  270.09   10.32
   3   9   2  284.75   10.18
  -4  -9  -2   -0.23    2.35
  -4  -9  -2   -0.16    2.06
  -4  -9  -2    0.46    2.13
  -4  -9  -2   -0.15    2.31
  -4  -9  -2    0.54    1.96
   4  -9   2    0.85    1.70
   4   9   2    0.62    2.27
  -4   9  -2   -1.12    2.35
  -4   9  -2    0.32    2.65
  -4   9  -2   -0.24    2.07
  -4   9  -2   -1.83    2.53
  -4   9  -2   -0.68    2.17
  -5  -9  -2  111.68    6.18
  -5  -9  -2  127.22    7.44
  -5  -9  -2  111.28    7.58
  -5  -9  -2  114.89    6.90
  -5  -9  -2  101.46    7.17
  -5   9  -2  117.94    7.74
  -5   9  -2  113.12    7.57
  -5   9  -2  111.79    7.00
  -5   9  -2  134.21    7.42
  -5   9  -2   92.86    7.07
   5   9   2  118.82    6.89
  -6  -9  -2   59.65    5.69
  -6  -9  -2   56.57    6.06
  -6  -9  -2   43.62    5.14
  -6  -9  -2   63.70    7.04
  -6   9  -2   87.15    7.99
  -6   9  -2   70.97    7.74
  -6   9  -2   66.85    6.45
  -6   9  -2   53.12    6.04
  -6   9  -2   49.82    6.07
  -7  -9  -2   75.11    6.62
  -7  -9  -2   71.72    7.31
  -7  -9  -2   65.70    6.59
  -7  -9  -2   65.07    6.98
  -7   9  -2   77.10    7.12
  -7   9  -2   73.78    7.40
  -7   9  -2   86.13    8.75
  -7   9  -2   84.40    7.70
  -7   9  -2   96.01    8.32
  -8  -9  -2   21.88    4.91
  -8  -9  -2   29.55    4.84
  -8  -9  -2   30.88    5.68
  -8  -9  -2   25.55    4.76
  -8   9  -2   29.00    4.90
  -8   9  -2   25.85    4.85
  -8   9  -2   23.84    5.03
  -8   9  -2   33.65    5.82
  -8   9  -2   20.05    5.73
  -9  -9  -2   57.41    6.88
  -9  -9  -2   90.33    9.17
  -9  -9  -2   66.90    8.01
  -9   9  -2   66.99    7.74
  -9   9  -2   64.77    7.39
  -9   9  -2   65.89    9.45
  -9   9  -2   66.23    7.52
 -10  -9  -2   59.51    7.77
 -10  -9  -2   58.55    7.80
 -10   9  -2   63.58    9.33
 -10   9  -2   38.80    6.17
 -10   9  -2   56.41    7.25
 -10   9  -2   55.59    7.72
 -11  -9  -2    2.38    4.50
 -11  -9  -2    6.30    4.88
 -11   9  -2   -1.68    3.38
 -11   9  -2   -0.17    3.79
 -11   9  -2   -5.95    4.07
 -11   9  -2    0.76    5.53
 -11 -10   2   -4.57    2.90
 -11 -10   2    7.56    4.45
 -11 -10   2    3.57    4.23
 -11  10   2   -1.94    3.36
 -11  10   2   -1.09    3.36
 -11  10   2    2.91    3.95
 -11  10   2    0.94    3.63
 -11  10   2    5.19    5.32
 -10 -10   2   36.73    6.11
 -10 -10   2   46.89    6.41
 -10 -10   2   35.31    6.08
 -10  10   2   48.30    8.68
 -10  10   2   40.24    5.47
 -10  10   2   41.91    6.26
 -10  10   2   26.90    5.18
 -10  10   2   35.39    5.47
  -9 -10   2   31.34    5.53
  -9 -10   2   34.65    5.75
  -9 -10   2   23.97    4.68
  -9  10   2   20.31    4.63
  -9  10   2   19.37    4.50
  -9  10   2   23.05    6.30
  -9  10   2   27.18    5.07
  -9  10   2   30.77    5.18
  -8 -10   2    1.07    2.97
  -8 -10   2   -0.86    2.80
  -8 -10   2   -2.98    2.84
  -8 -10   2   -2.04    2.20
  -8  10   2   -2.15    4.07
  -8  10   2    5.36    3.10
  -8  10   2    2.29    3.17
  -8  10   2   -6.70    2.63
  -8  10   2    4.69    3.10
  -7 -10   2   22.23    4.46
  -7 -10   2   22.89    4.66
  -7 -10   2   17.39    3.69
  -7 -10   2   12.29    3.48
  -7  10   2   18.92    4.12
  -7  10   2   25.35    5.60
  -7  10   2    7.63    3.05
  -7  10   2   22.64    4.18
  -7  10   2   14.96    3.95
  -6 -10   2   -3.30    2.09
  -6 -10   2   -0.65    2.73
  -6 -10   2   -3.70    1.99
  -6 -10   2    2.38    2.78
  -6  10   2   -0.47    3.07
  -6  10   2   -0.92    2.70
  -6  10   2   -1.52    2.28
  -6  10   2    3.33    2.97
  -6  10   2   -2.21    2.15
  -5 -10   2  373.02   12.92
  -5 -10   2  382.20   12.69
  -5 -10   2  402.69   13.22
  -5 -10   2  395.27   13.50
  -5  10   2  380.98   10.31
  -5  10   2  413.67   12.86
  -5  10   2  417.48   13.47
  -5  10   2  418.74   13.27
  -5  10   2  409.42   13.13
  -5  10   2  366.21   13.51
  -4 -10   2   14.61    3.40
  -4 -10   2   16.00    3.39
  -4 -10   2   16.77    3.68
   4 -10  -2   15.93    3.12
  -4 -10   2   14.22    3.16
  -4 -10   2   16.81    2.01
  -4  10   2   20.81    4.33
  -4  10   2   14.03    3.55
  -4  10   2   13.03    3.57
   4  10  -2   16.72    3.42
  -4  10   2   12.17    3.07
  -4  10   2   16.53    3.72
  -4  10   2   11.67    2.60
  -3 -10   2   69.81    5.98
  -3 -10   2   66.56    3.32
   3 -10  -2   73.03    5.25
  -3 -10   2   77.25    6.11
  -3 -10   2   76.05    5.76
  -3  10   2   75.38    4.56
  -3  10   2   70.65    6.35
  -3  10   2   66.32    5.90
  -3  10   2   72.79    5.59
   3  10  -2   67.45    5.90
  -3  10   2   72.25    6.35
  -3  10   2   61.89    6.03
  -3  10   2   63.68    6.23
  -2 -10   2   96.72    6.28
  -2 -10   2  104.45    6.79
  -2 -10   2   91.37    6.19
  -2 -10   2   93.78    5.75
   2 -10  -2  104.96    6.19
  -2  10   2   93.01    6.06
  -2  10   2  103.47    6.87
   2  10  -2  104.26    6.84
  -2  10   2   98.67    6.28
   2  10  -2   86.52    6.25
  -2  10   2  106.58    6.84
  -1 -10   2    2.27    2.26
  -1 -10   2    4.20    2.43
   1 -10  -2    3.69    2.73
   1 -10  -2    7.64    2.78
  -1  10   2    3.10    2.13
   1  10  -2    7.59    2.89
   1  10  -2   -1.03    2.38
   1  10  -2    2.62    2.48
  -1  10   2   -1.50    1.90
  -1  10   2    1.20    2.61
   0 -10   2   35.90    4.41
   0 -10  -2   34.87    4.60
   0 -10   2   45.62    5.23
   0 -10  -2   36.79    4.77
   0  10   2   37.82    5.37
   0  10  -2   34.26    4.71
   0  10  -2   44.66    4.13
   0  10  -2   35.85    4.67
   0  10   2   38.21    4.93
  -1 -10  -2  111.12    6.96
   1 -10   2  102.95    6.78
   1 -10   2  102.92    6.39
  -1 -10  -2  111.70    6.83
   1  10   2  103.73    6.94
  -1  10  -2  103.92    6.86
  -1  10  -2  104.51    7.02
  -1  10  -2  116.54    6.04
   1  10   2  108.27    7.06
  -2 -10  -2    1.90    2.58
   2 -10   2   -0.85    1.89
  -2 -10  -2    5.16    2.62
   2 -10   2    3.20    2.37
   2  10   2    3.02    2.52
   2  10   2    2.52    2.60
  -2  10  -2    2.74    2.64
  -2  10  -2    4.42    2.56
  -2  10  -2    4.77    2.77
  -2  10  -2   -1.64    1.90
  -3 -10  -2   76.14    5.79
   3 -10   2   78.54    5.52
  -3 -10  -2   86.04    7.59
  -3 -10  -2   80.84    5.19
  -3 -10  -2   83.17    6.44
  -3  10  -2   90.95    6.34
  -3  10  -2   65.62    6.23
  -3  10  -2   88.72    7.20
  -3  10  -2   76.77    6.92
   3  10   2   65.99    6.06
  -4 -10  -2   24.29    3.82
  -4 -10  -2   24.38    3.99
   4 -10   2   20.87    3.52
  -4 -10  -2   24.37    4.54
  -4 -10  -2   22.28    4.29
   4  10   2   23.65    4.05
  -4  10  -2   23.34    4.03
  -4  10  -2   15.19    4.10
  -4  10  -2   15.60    4.05
  -4  10  -2   25.46    4.50
  -5 -10  -2    6.47    2.86
  -5 -10  -2    9.27    2.76
  -5 -10  -2    3.03    3.13
  -5 -10  -2   13.68    3.99
  -5  10  -2   10.47    4.10
   5  10   2    7.43    3.09
  -5  10  -2   10.32    3.87
  -5  10  -2    8.03    3.11
  -5  10  -2   12.40    3.91
  -6 -10  -2   12.58    3.28
  -6 -10  -2   10.45    3.16
  -6 -10  -2    7.61    3.96
  -6 -10  -2    8.70    3.73
  -6  10  -2   16.82    4.11
  -6  10  -2    8.63    3.69
  -6  10  -2    9.04    4.03
  -6  10  -2    7.60    3.78
  -7 -10  -2   32.01    5.64
  -7 -10  -2   27.16    5.12
  -7 -10  -2   17.87    4.31
  -7 -10  -2   25.26    4.47
  -7  10  -2   29.78    5.51
  -7  10  -2   28.25    5.48
  -7  10  -2   17.85    5.22
  -7  10  -2   31.68    5.02
  -8 -10  -2   98.12    9.35
  -8 -10  -2   91.06    9.21
  -8  10  -2   78.68    8.16
  -8  10  -2   90.83    9.69
  -8  10  -2   91.75    8.45
  -8  10  -2   86.94    8.55
  -9 -10  -2    1.65    4.09
  -9 -10  -2    0.31    3.71
  -9  10  -2    2.69    3.03
  -9  10  -2    1.76    4.38
  -9  10  -2    4.94    5.08
  -9  10  -2    4.99    4.09
 -10 -10  -2   -1.47    4.00
 -10 -10  -2    9.85    5.25
 -10  10  -2   -1.49    4.13
 -10  10  -2   -1.91    4.28
 -10  10  -2   -6.56    2.86
 -10  10  -2   -4.38    4.53
 -11 -10  -2    7.45    5.28
 -11 -10  -2   13.06    5.80
 -11  10  -2   -0.01    4.38
 -11  10  -2    6.34    4.20
 -11  10  -2   13.96    5.62
 -11  10  -2   -5.38    5.00
 -11 -11   2    0.51    3.45
 -11 -11   2    6.07    4.70
 -11 -11   2   -0.10    4.52
 -11  11   2   -3.37    3.11
 -11  11   2    3.22    4.04
 -11  11   2    2.30    3.90
 -11  11   2   -6.33    4.69
 -10 -11   2    2.35    4.19
 -10 -11   2    5.08    3.69
 -10 -11   2    3.12    4.15
 -10  11   2   -2.64    3.28
 -10  11   2    3.46    3.99
 -10  11   2   -0.37    3.46
 -10  11   2   -2.51    4.79
 -10  11   2    0.02    4.02
  -9 -11   2   53.00    7.20
  -9 -11   2   31.98    5.30
  -9 -11   2   63.03    7.78
  -9  11   2   46.68    6.29
  -9  11   2   52.51    6.94
  -9  11   2   45.78    6.12
  -9  11   2   45.48    8.10
  -9  11   2   52.21    6.85
  -8 -11   2    2.85    3.36
  -8 -11   2    2.13    3.41
  -8 -11   2   -1.97    2.42
  -8  11   2    0.13    3.17
  -8  11   2    0.72    3.05
  -8  11   2   -0.12    3.88
  -8  11   2    2.30    3.07
  -8  11   2   -4.25    2.94
  -7 -11   2    4.51    2.71
  -7 -11   2    7.42    3.52
  -7 -11   2   20.59    4.73
  -7  11   2    8.29    4.53
  -7  11   2    7.79    4.00
  -7  11   2    3.87    3.23
  -7  11   2   11.04    3.45
  -7  11   2    3.28    3.41
  -6 -11   2   50.49    6.72
  -6 -11   2   50.73    5.82
  -6 -11   2   49.36    5.98
  -6  11   2   49.28    5.80
  -6  11   2   47.95    5.84
  -6  11   2   40.26    5.54
  -6  11   2   43.77    6.56
  -6  11   2   38.44    5.49
  -5 -11   2    5.38    3.10
  -5 -11   2    7.40    2.77
  -5 -11   2   12.27    4.11
  -5  11   2   11.45    3.71
  -5  11   2   11.61    3.75
  -5  11   2    3.34    2.67
  -5  11   2    6.12    3.62
  -5  11   2    8.65    3.16
  -4 -11   2    3.88    2.86
  -4 -11   2    2.35    2.17
  -4 -11   2    1.39    2.91
  -4  11   2    0.15    2.56
   4  11  -2    1.45    2.65
  -4  11   2    2.25    3.06
  -4  11   2    6.07    3.20
  -4  11   2    6.05    2.76
  -4  11   2    7.61    2.41
  -4  11   2    4.35    3.01
   3 -11  -2   30.73    4.18
  -3 -11   2   28.50    4.31
  -3 -11   2   26.85    3.65
  -3 -11   2   45.17    6.04
  -3  11   2   35.12    5.08
  -3  11   2   36.49    4.01
   3  11  -2   36.20    5.18
  -3  11   2   25.08    3.85
  -3  11   2   34.78    4.91
  -3  11   2   46.96    5.85
  -3  11   2   34.45    5.05
  -2 -11   2    2.03    2.58
  -2 -11   2    3.47    2.80
   2 -11  -2   10.24    3.03
  -2  11   2    4.59    3.11
  -2  11   2    6.42    3.35
   2  11  -2    7.65    3.24
  -2  11   2    2.16    1.96
  -1 -11   2   16.23    3.61
   1 -11  -2   13.38    3.27
  -1 -11   2   14.61    3.48
  -1  11   2   19.90    4.17
  -1  11   2   14.18    3.54
   1  11  -2   18.95    4.11
   1  11  -2   14.37    3.60
   1  11  -2   21.26    4.34
  -1  11   2   14.99    3.66
   0 -11   2   84.36    8.00
   0 -11   2   77.46    6.60
   0 -11  -2   60.36    5.68
   0 -11  -2   57.94    5.69
   0  11  -2   70.45    6.52
   0  11  -2   79.56    7.65
   0  11   2   66.00    6.37
   0  11   2   64.66    6.54
   0  11  -2   70.76    4.95
  -1 -11  -2   84.70    7.36
   1 -11   2   86.42    6.66
   1 -11   2   98.69    6.52
  -1 -11  -2   60.09    5.82
   1  11   2   85.45    7.65
   1  11   2   98.12    8.85
  -1  11  -2   66.44    6.83
  -1  11  -2   87.18    5.78
  -1  11  -2   84.41    7.76
  -2 -11  -2   55.30    6.13
   2 -11   2   61.39    6.10
  -2  11  -2   54.57    5.83
   2  11   2   59.04    6.34
  -2  11  -2   65.17    6.24
  -2  11  -2   59.33    6.76
  -3 -11  -2   85.52    7.55
  -3 -11  -2   83.17    7.41
   3 -11   2   86.34    6.22
  -3 -11  -2   86.57    5.66
  -3  11  -2   83.22    7.39
  -3  11  -2  104.08    9.19
   3  11   2   88.30    7.70
  -3  11  -2   83.70    7.35
  -4 -11  -2   54.58    5.15
  -4 -11  -2   58.04    6.53
  -4 -11  -2   74.32    7.71
   4 -11   2   61.87    5.90
   4  11   2   61.71    6.66
  -4  11  -2   56.36    6.77
  -4  11  -2   61.82    7.30
  -4  11  -2   56.98    6.61
  -4  11  -2   57.40    6.65
  -5 -11  -2   20.40    4.56
  -5 -11  -2   11.00    3.20
  -5 -11  -2   15.07    4.23
  -5  11  -2    5.89    3.53
  -5  11  -2   18.57    4.97
  -5  11  -2    5.76    3.75
  -5  11  -2   11.57    3.80
  -6 -11  -2   10.11    4.13
  -6 -11  -2   18.25    4.72
  -6 -11  -2   14.43    3.79
  -6  11  -2   11.24    4.06
  -6  11  -2   12.30    4.84
  -6  11  -2   10.29    4.02
  -6  11  -2    9.28    4.01
  -7 -11  -2   16.98    4.69
  -7 -11  -2   14.92    4.86
  -7  11  -2   13.88    4.65
  -7  11  -2   15.87    4.66
  -7  11  -2    7.71    4.92
  -7  11  -2    7.33    4.45
  -8 -11  -2    6.51    4.28
  -8 -11  -2   -1.23    3.73
  -8  11  -2    8.73    4.93
  -8  11  -2    3.15    4.04
  -8  11  -2    5.77    3.85
  -8  11  -2   -2.21    4.40
  -9 -11  -2   26.99    5.77
  -9 -11  -2   34.96    6.89
  -9  11  -2   25.08    6.93
  -9  11  -2   39.49    7.26
  -9  11  -2   31.38    6.37
 -10 -11  -2    8.77    5.43
 -10 -11  -2   12.08    5.85
 -10  11  -2   -5.98    4.36
 -10  11  -2    7.91    4.71
 -10  11  -2    8.80    4.97
 -11 -11  -2   20.13    6.89
 -11 -11  -2   21.33    6.85
 -11  11  -2   24.18    6.81
 -11  11  -2   14.86    5.82
 -11  11  -2   11.02    6.48
 -11 -12   2    8.61    5.09
 -11 -12   2   10.99    5.74
 -11  12   2   22.32    5.36
 -11  12   2   14.50    5.46
 -11  12   2    9.42    4.72
 -11  12   2   19.63    7.49
 -10 -12   2   41.95    7.24
 -10 -12   2   35.96    6.76
 -10  12   2   37.54    6.48
 -10  12   2   18.69    5.49
 -10  12   2   24.22    5.70
 -10  12   2   33.44    7.52
  -9 -12   2   26.86    6.02
  -9 -12   2   27.18    6.22
  -9  12   2   26.81    5.51
  -9  12   2   28.44    5.98
  -9  12   2   17.86    4.72
  -9  12   2   27.49    6.89
  -8 -12   2    1.27    3.77
  -8 -12   2    7.93    4.12
  -8  12   2    5.51    4.63
  -8  12   2    0.24    3.06
  -8  12   2    3.54    3.53
  -8  12   2    1.06    3.71
  -7 -12   2  245.17   12.03
  -7 -12   2  262.26   12.12
  -7  12   2  232.69   11.46
  -7  12   2  250.17   11.83
  -7  12   2  256.04   11.63
  -7  12   2  261.84   12.97
  -6 -12   2   81.95    8.07
  -6 -12   2   80.12    7.96
  -6  12   2   74.50    7.13
  -6  12   2   77.07    8.67
  -6  12   2   72.76    7.80
  -6  12   2   76.15    7.85
  -5 -12   2    3.97    3.29
  -5 -12   2    0.38    2.93
  -5  12   2   -3.19    2.72
  -5  12   2    2.48    2.92
  -5  12   2    7.27    3.51
  -5  12   2   -3.33    3.13
  -4 -12   2    6.35    3.22
  -4 -12   2    3.03    3.11
  -4  12   2    5.73    3.05
   4  12  -2    3.19    2.92
  -4  12   2    5.80    2.53
  -4  12   2    9.31    3.57
  -4  12   2    6.57    3.53
  -4  12   2   10.44    3.80
  -4  12   2    2.50    3.43
  -3 -12   2   84.97    8.39
  -3 -12   2   69.59    6.80
   3 -12  -2   76.32    6.83
  -3  12   2   78.73    7.74
  -3  12   2   60.44    6.81
  -3  12   2   72.39    7.33
  -3  12   2   64.10    6.79
  -3  12   2   59.27    5.11
   3  12  -2   77.75    7.41
  -3  12   2   60.03    6.27
  -2 -12   2  132.26    8.56
  -2 -12   2  142.42    8.30
   2 -12  -2  138.94    7.85
  -2  12   2  146.51    8.85
   2  12  -2  143.86    8.64
  -2  12   2  140.22    8.77
   1 -12  -2   15.94    3.86
  -1 -12   2   13.76    3.54
  -1 -12   2   18.08    4.10
  -1  12   2   15.27    4.36
   1  12  -2    7.98    3.42
  -1  12   2   11.47    3.87
   0 -12   2  150.97    8.85
   0 -12  -2  146.88    8.39
   0 -12   2  141.33    8.34
   0  12  -2  160.63    9.00
   0  12  -2  144.52    8.96
   0  12   2  157.88    9.05
   0  12  -2  156.89    9.16
   0  12   2  166.11    9.27
  -1 -12  -2  574.76   17.67
   1 -12   2  621.49   17.80
  -1 -12  -2  603.80   18.57
  -1  12  -2  622.40   16.15
  -1  12  -2  612.43   18.90
  -1  12  -2  610.68   18.16
   1  12   2  636.30   18.94
   1  12   2  590.38   17.99
   2 -12   2   71.28    6.53
  -2 -12  -2   67.76    6.71
   2  12   2   76.46    7.27
  -2  12  -2   69.67    7.35
  -2  12  -2   89.56    7.24
  -2  12  -2   80.17    8.41
  -3 -12  -2   17.86    4.43
  -3 -12  -2   22.30    3.85
  -3 -12  -2   18.72    5.01
   3 -12   2   24.65    4.34
   3  12   2   26.14    5.07
  -3  12  -2   19.91    4.26
  -3  12  -2   19.30    4.84
  -3  12  -2   23.22    5.10
   4 -12   2  226.16    9.98
  -4 -12  -2  222.78   11.12
  -4 -12  -2  243.18   11.71
  -4 -12  -2  213.55    8.86
  -4  12  -2  221.82   10.69
  -4  12  -2  222.41   10.84
  -4  12  -2  236.48   11.37
   4  12   2  226.85   10.75
  -5 -12  -2  171.77   10.13
  -5 -12  -2  172.87   10.46
  -5 -12  -2  167.65    7.98
  -5  12  -2  169.10    9.99
  -5  12  -2  163.77    9.92
  -5  12  -2  188.82   10.51
  -6 -12  -2   40.75    6.27
  -6 -12  -2   41.50    6.69
  -6 -12  -2   37.52    4.82
  -6  12  -2   45.92    6.85
  -6  12  -2   31.33    5.74
  -6  12  -2   49.96    6.75
  -7 -12  -2  253.28   12.88
  -7 -12  -2  242.09   12.42
  -7  12  -2  230.92   12.90
  -7  12  -2  227.51   12.12
  -7  12  -2  234.97   12.20
  -8 -12  -2   36.51    6.97
  -8 -12  -2   43.59    7.11
  -8  12  -2   41.94    7.61
  -8  12  -2   49.20    7.67
  -8  12  -2   49.81    7.55
  -9 -12  -2   14.70    5.47
  -9 -12  -2   10.13    5.01
  -9  12  -2   14.79    5.82
  -9  12  -2   20.50    5.97
  -9  12  -2   22.05    7.07
 -10 -12  -2    8.45    5.51
 -10 -12  -2   11.74    6.51
 -10  12  -2   15.26    6.94
 -10  12  -2   12.16    5.61
 -10  12  -2   10.83    5.79
 -10 -13   2    3.82    5.20
 -10 -13   2    5.54    5.37
 -10  13   2   -2.29    4.15
 -10  13   2    2.21    5.43
 -10  13   2    0.73    4.29
  -9 -13   2   -0.93    4.27
  -9 -13   2   15.51    5.58
  -9  13   2   -3.25    3.18
  -9  13   2   16.44    6.16
  -9  13   2    1.83    4.08
  -9  13   2    0.70    4.37
  -8 -13   2    6.98    4.51
  -8 -13   2    2.02    4.19
  -8  13   2    4.07    5.08
  -8  13   2    8.87    4.80
  -8  13   2    2.56    3.93
  -7 -13   2    3.32    4.19
  -7 -13   2    8.89    4.78
  -7  13   2   -3.81    3.55
  -7  13   2    0.19    3.77
  -7  13   2   -1.12    4.06
  -6 -13   2   14.04    4.80
  -6 -13   2    7.17    4.13
  -6  13   2   16.43    4.58
  -6  13   2   15.99    4.87
  -6  13   2    6.27    4.46
  -5 -13   2   32.81    5.53
  -5 -13   2   28.55    5.25
  -5  13   2   30.53    5.51
  -5  13   2   29.26    5.79
  -5  13   2   36.41    6.00
  -5  13   2   32.59    6.17
  -4 -13   2    7.66    3.91
  -4 -13   2   13.93    4.39
  -4  13   2   12.55    4.26
  -4  13   2   12.48    4.52
  -4  13   2   20.66    5.17
  -4  13   2   19.48    4.65
   4  13  -2   23.95    4.79
  -3 -13   2    4.54    3.35
  -3 -13   2    2.30    3.47
   3 -13  -2    3.86    3.03
   3  13  -2    3.30    3.61
  -3  13   2   11.95    4.09
  -3  13   2    2.97    3.26
  -3  13   2    6.63    2.52
  -2 -13   2   15.47    4.28
   2 -13  -2    6.83    3.55
  -2 -13   2   17.41    5.05
  -2  13   2   14.95    4.90
   2  13  -2   16.34    4.21
  -2  13   2   10.69    4.00
  -1 -13   2   60.04    6.71
   1 -13  -2   62.93    6.96
  -1 -13   2   61.36    6.99
  -1  13   2   66.50    7.33
  -1  13   2   53.15    6.83
   1  13  -2   58.10    6.63
   0 -13  -2    5.51    3.33
   0 -13   2    4.91    3.21
   0  13   2    0.83    2.88
   0  13  -2    4.18    3.60
   0  13  -2    4.79    3.64
   0  13   2    0.97    3.44
  -1 -13  -2    4.53    3.53
   1 -13   2    9.58    3.52
  -1  13  -2    4.18    2.84
   1  13   2    4.60    3.54
  -1  13  -2    6.49    3.93
  -1  13  -2    5.25    3.53
  -2 -13  -2   18.17    4.92
  -2 -13  -2   14.39    4.04
   2 -13   2   20.99    4.33
  -2  13  -2   14.89    4.45
  -2  13  -2   10.65    4.65
  -2  13  -2   22.52    4.45
   2  13   2   16.26    4.56
  -3 -13  -2   42.62    6.98
  -3 -13  -2   37.87    5.95
   3 -13   2   41.23    5.52
   3  13   2   44.82    6.52
  -3  13  -2   36.96    5.56
  -3  13  -2   31.83    5.85
  -3  13  -2   52.00    7.18
  -4 -13  -2   18.57    5.16
  -4 -13  -2   20.13    4.96
  -4 -13  -2   21.88    3.92
  -4  13  -2   21.43    4.99
  -4  13  -2   14.15    4.58
   4  13   2   22.71    5.08
  -4  13  -2   20.11    5.08
  -5 -13  -2   13.60    4.68
  -5 -13  -2   18.56    5.17
  -5 -13  -2   13.07    3.68
  -5  13  -2   13.00    5.24
  -5  13  -2   14.35    4.49
  -5  13  -2   10.66    4.52
  -6 -13  -2   65.91    7.98
  -6 -13  -2   68.58    8.28
  -6  13  -2   69.20    8.47
  -6  13  -2   72.54    8.99
  -6  13  -2   71.53    8.25
  -7 -13  -2   10.49    5.07
  -7 -13  -2   -1.87    4.13
  -7  13  -2    3.65    4.30
  -7  13  -2    0.73    4.62
  -7  13  -2   13.69    4.95
  -8 -13  -2   -1.59    4.42
  -8 -13  -2    2.91    4.55
  -8  13  -2    3.23    4.88
  -8  13  -2    0.33    4.84
  -8  13  -2   -0.40    5.25
  -9 -13  -2   26.05    6.65
  -9 -13  -2   22.52    6.12
  -9  13  -2   17.73    7.23
  -9  13  -2   29.66    6.98
  -9  13  -2   15.97    6.18
 -10 -13  -2   57.11    9.31
 -10 -13  -2   61.24    9.28
 -10  13  -2   62.54    9.07
 -10  13  -2   60.02    8.84
 -10  13  -2   50.83    9.91
 -10 -14   2    8.67    5.73
 -10 -14   2   15.88    6.38
 -10  14   2    0.59    5.60
 -10  14   2   15.66    5.47
 -10  14   2   19.93    6.25
  -9 -14   2    5.53    5.66
  -9 -14   2   -0.66    4.86
  -9  14   2   -1.11    4.54
  -9  14   2   -1.64    5.17
  -9  14   2    6.60    4.94
  -8 -14   2   -3.36    4.09
  -8 -14   2    1.32    4.03
  -8  14   2    5.21    4.48
  -8  14   2    4.34    4.42
  -8  14   2    2.28    4.91
  -7 -14   2    8.08    4.70
  -7 -14   2    6.77    4.55
  -7  14   2   13.77    5.41
  -7  14   2    8.90    4.59
  -7  14   2    6.48    5.35
  -6 -14   2    8.55    4.40
  -6 -14   2   -1.25    4.14
  -6  14   2    1.57    3.91
  -6  14   2    5.34    4.66
  -6  14   2   -3.63    3.32
  -6  14   2   -3.12    3.57
  -5 -14   2   16.49    5.44
  -5 -14   2   12.48    4.76
  -5  14   2    9.29    4.70
  -5  14   2   12.14    4.82
  -5  14   2   12.93    5.28
  -5  14   2   13.45    4.95
  -4 -14   2  104.23   10.01
  -4 -14   2   78.87    8.24
  -4  14   2   76.47    7.98
  -4  14   2   71.19    7.64
  -4  14   2   85.86    8.91
  -4  14   2   83.77    8.76
  -3 -14   2   17.38    5.03
  -3 -14   2   26.38    5.45
   3 -14  -2   19.53    4.50
  -3  14   2   16.10    5.25
  -3  14   2   19.20    3.50
  -3  14   2   20.91    5.22
   3  14  -2   15.08    4.62
  -2 -14   2   33.44    5.38
   2 -14  -2   31.22    5.26
  -2 -14   2   30.32    5.61
   2  14  -2   34.96    6.18
  -2  14   2   32.76    5.81
  -2  14   2   29.17    5.63
  -1 -14   2    0.60    3.34
   1 -14  -2   -0.42    2.91
  -1  14   2    2.84    3.65
   1  14  -2    7.49    3.77
  -1  14   2    1.85    3.26
   0 -14   2   29.80    5.38
   0 -14  -2   12.98    4.46
   0  14  -2   14.64    4.40
   0  14  -2   14.54    4.77
   0  14   2   12.18    4.64
   1 -14   2    1.15    3.29
  -1 -14  -2   -0.90    3.36
   1  14   2    0.86    3.85
  -1  14  -2   -1.69    3.29
  -1  14  -2    3.89    4.38
  -1  14  -2    3.83    3.79
  -2 -14  -2   58.62    7.05
   2 -14   2   66.42    7.33
  -2  14  -2   54.91    7.06
   2  14   2   49.95    7.03
  -2  14  -2   50.38    6.39
  -2  14  -2   45.29    6.43
  -3 -14  -2   -0.68    3.62
   3 -14   2   10.58    4.09
  -3 -14  -2    8.14    4.09
  -3  14  -2    9.58    4.45
  -3  14  -2   17.41    4.33
   3  14   2    2.00    3.91
  -3  14  -2    5.23    4.48
  -4 -14  -2   16.59    5.44
  -4 -14  -2   17.00    3.71
  -4 -14  -2   11.83    4.88
  -4  14  -2    9.20    5.23
   4  14   2    6.04    4.01
  -4  14  -2   13.13    4.56
  -4  14  -2   10.61    4.61
  -5 -14  -2   -1.61    4.23
  -5 -14  -2    0.42    4.01
  -5  14  -2   -3.31    3.08
  -5  14  -2    2.41    4.00
  -5  14  -2    9.02    4.68
  -6 -14  -2   10.48    5.40
  -6 -14  -2   14.83    5.14
  -6  14  -2   14.83    5.51
  -6  14  -2    8.31    5.32
  -6  14  -2    6.04    4.72
  -7 -14  -2   27.86    6.34
  -7 -14  -2   36.21    7.40
  -7  14  -2   25.74    6.15
  -7  14  -2   39.64    7.44
  -7  14  -2   21.40    6.80
  -8 -14  -2   17.27    6.17
  -8 -14  -2   22.93    6.43
  -8  14  -2   14.50    6.38
  -8  14  -2   16.87    6.37
  -8  14  -2   24.14    6.31
  -9 -14  -2    2.24    4.96
  -9 -14  -2   13.72    6.13
  -9  14  -2    8.69    6.41
  -9  14  -2   11.06    5.94
  -9  14  -2    5.40    6.13
  -9 -15   2  103.33   11.38
  -9 -15   2   77.37    9.76
  -9  15   2   88.22   10.28
  -9  15   2   79.25    9.79
  -9  15   2   83.36   11.02
  -8 -15   2   13.94    5.82
  -8 -15   2   19.52    6.55
  -8  15   2   18.80    6.16
  -8  15   2    6.24    5.31
  -8  15   2   10.74    6.37
  -8  15   2    8.99    4.98
  -7 -15   2   10.91    5.25
  -7 -15   2   14.41    5.37
  -7  15   2    7.89    5.32
  -7  15   2   13.05    5.28
  -7  15   2   10.17    5.00
  -7  15   2   10.23    5.23
  -6 -15   2   -3.30    3.77
  -6 -15   2   -1.08    4.07
  -6  15   2   -0.83    3.95
  -6  15   2    1.49    4.27
  -6  15   2    7.78    5.04
  -6  15   2   -1.66    3.88
  -5 -15   2   89.63    9.33
  -5 -15   2   97.02   10.02
  -5  15   2   94.09   10.00
  -5  15   2   82.36    9.14
  -5  15   2  105.16   10.96
  -5  15   2   93.29    9.21
  -4 -15   2   99.54    9.64
  -4 -15   2   92.59    9.00
  -4  15   2  112.77   10.55
  -4  15   2  106.87   10.10
  -3 -15   2    1.65    3.99
  -3 -15   2    0.14    3.67
  -3  15   2    2.23    4.00
  -3  15   2    5.18    4.06
   3  15  -2    2.95    3.83
  -2 -15   2   51.39    6.90
   2 -15  -2   60.81    7.46
  -2  15   2   41.36    6.75
  -2  15   2   46.49    6.75
   2  15  -2   56.98    6.99
  -1 -15   2   90.45    8.92
   1 -15  -2  103.86    9.63
  -1  15   2   90.14    9.22
   1  15  -2   90.62    9.23
  -1  15   2   78.52    8.31
   0 -15  -2   -3.75    3.08
   0 -15   2    3.58    3.93
   0  15   2   -1.01    3.36
   0  15  -2    2.94    3.91
   1 -15   2   39.39    6.47
  -1 -15  -2   40.28    6.45
  -1  15  -2   32.34    6.22
   1  15   2   38.77    6.53
  -1  15  -2   45.44    7.25
   2 -15   2  123.07   10.24
  -2 -15  -2  124.31   10.89
  -2  15  -2  115.13   10.39
  -2  15  -2  132.81    8.70
  -2  15  -2  140.81   12.48
   2  15   2  111.28   10.17
   3 -15   2   89.27    8.46
  -3 -15  -2   71.82    8.78
   3  15   2   72.05    8.65
  -3  15  -2   89.98    9.52
  -3  15  -2   88.65   10.29
  -3  15  -2   89.31    8.79
  -4 -15  -2    5.55    4.73
  -4 -15  -2    1.62    3.94
  -4  15  -2   13.25    4.83
  -4  15  -2    4.24    4.42
   4  15   2    7.46    4.57
  -4  15  -2   12.26    5.93
  -5 -15  -2   33.29    7.15
  -5 -15  -2   35.54    6.89
  -5  15  -2   26.44    5.97
  -5  15  -2   27.58    6.53
  -5  15  -2   32.15    7.04
  -6 -15  -2   25.34    6.62
  -6 -15  -2   25.89    6.74
  -6  15  -2   21.31    6.28
  -6  15  -2   21.30    6.32
  -6  15  -2   25.37    6.56
  -7 -15  -2    5.86    5.61
  -7 -15  -2    6.11    5.39
  -7  15  -2    8.91    6.01
  -7  15  -2   10.01    5.86
  -7  15  -2    8.80    5.25
  -8 -15  -2   -2.35    4.56
  -8 -15  -2    4.43    5.85
  -8  15  -2   -5.19    4.69
  -8  15  -2    1.74    5.51
  -8  15  -2    2.56    5.72
  -9 -15  -2   50.91    8.77
  -9 -15  -2   57.60    9.39
  -9  15  -2   64.35   10.93
  -9  15  -2   47.62    9.07
  -9  15  -2   48.31    8.88
  -9 -16   2   25.46    7.61
  -9 -16   2   17.99    6.67
  -9  16   2   15.33    7.81
  -9  16   2   33.07    7.91
  -9  16   2   31.38    8.00
  -9  16   2   12.54    6.11
  -8 -16   2    8.07    5.22
  -8 -16   2   15.56    6.55
  -8  16   2    4.72    5.34
  -8  16   2    6.59    5.41
  -8  16   2   22.62    7.31
  -8  16   2   -3.40    5.02
  -7 -16   2    7.15    5.08
  -7 -16   2    3.61    4.64
  -7  16   2   -8.85    3.53
  -7  16   2    2.86    5.15
  -7  16   2    9.40    5.83
  -7  16   2    9.83    5.38
  -6 -16   2    5.09    5.09
  -6 -16   2    2.77    4.52
  -6  16   2    8.43    5.57
  -6  16   2   11.85    5.43
  -6  16   2   10.06    5.49
  -6  16   2    1.42    4.42
  -5 -16   2   26.13    6.68
  -5 -16   2   22.38    6.03
  -5  16   2   18.51    6.05
  -5  16   2   14.61    6.51
  -4 -16   2   14.17    6.06
  -4 -16   2    9.78    4.72
  -4  16   2    6.86    5.03
  -4  16   2   18.70    6.05
  -3 -16   2   52.79    7.74
   3  16  -2   54.06    8.12
  -3  16   2   54.68    8.15
  -3  16   2   54.96    8.70
   2 -16  -2    0.48    3.80
  -2 -16   2    6.59    4.20
  -2  16   2    0.79    4.69
   2  16  -2   -2.81    4.04
  -2  16   2    2.13    4.74
   1 -16  -2   46.08    6.89
  -1 -16   2   47.25    7.10
   1  16  -2   45.85    7.33
  -1  16   2   51.24    7.50
   0 -16  -2   63.49    8.24
   0 -16   2   58.51    7.63
   0  16   2   48.50    7.64
   0  16  -2   48.23    7.97
   1 -16   2    7.34    4.30
  -1 -16  -2    3.71    4.57
  -1  16  -2    3.27    4.54
   1  16   2   14.18    5.56
  -1  16  -2   20.41    5.72
  -2 -16  -2   10.58    4.88
   2 -16   2   10.21    4.57
   2  16   2   10.20    5.07
  -2  16  -2    8.38    4.80
  -2  16  -2    9.15    4.52
  -2  16  -2   14.84    5.21
  -3 -16  -2   -1.78    4.40
   3 -16   2   21.03    5.33
  -3  16  -2   13.97    4.93
   3  16   2   11.79    5.52
  -3  16  -2   18.33    5.29
  -3  16  -2   12.28    5.54
  -4 -16  -2   26.34    6.72
  -4  16  -2   14.05    5.20
  -4  16  -2   25.60    6.44
  -4  16  -2   31.69    6.46
  -5 -16  -2   13.64    5.65
  -5 -16  -2    6.15    5.18
  -5  16  -2   -7.82    3.43
  -5  16  -2    1.51    4.84
  -5  16  -2    9.61    5.32
  -6 -16  -2    0.99    4.84
  -6 -16  -2    4.07    5.20
  -6  16  -2   -2.16    4.03
  -6  16  -2   -0.03    4.89
  -6  16  -2   -6.37    4.53
  -7 -16  -2    8.62    6.00
  -7 -16  -2    5.86    5.38
  -7  16  -2   16.08    6.04
  -7  16  -2    2.88    5.25
  -7  16  -2    3.59    5.85
  -8 -16  -2    9.01    6.14
  -8 -16  -2    7.65    5.91
  -8  16  -2    8.25    6.07
  -8  16  -2    2.59    6.03
  -8  16  -2    6.46    5.35
  -8 -17   2   23.39    6.81
  -8 -17   2   15.70    7.16
  -8  17   2   11.19    7.07
  -8  17   2   34.77    9.26
  -8  17   2   24.61    7.03
  -8  17   2   25.29    7.15
  -7 -17   2    6.12    5.61
  -7 -17   2   -6.72    5.04
  -7  17   2    5.30    6.14
  -7  17   2   -3.11    5.10
  -7  17   2   -8.10    4.46
  -6 -17   2   -1.26    5.19
  -6 -17   2    7.53    5.57
  -6  17   2    5.93    5.79
  -6  17   2   14.06    6.33
  -6  17   2    5.55    5.94
  -5 -17   2   18.95    6.49
  -5 -17   2    8.14    5.21
  -5  17   2    8.41    6.23
  -5  17   2   25.62    6.92
  -4 -17   2   28.38    6.98
  -4  17   2   24.02    6.81
  -4  17   2   25.36    7.71
  -3 -17   2    7.25    5.42
  -3  17   2    5.25    5.37
  -3  17   2    2.80    5.21
   2 -17  -2   72.13    8.37
  -2 -17   2   75.04    9.06
  -2  17   2   63.94    8.84
   2  17  -2   75.18    8.95
  -1 -17   2   17.73    5.50
   1 -17  -2   11.78    5.27
  -1  17   2   12.17    5.47
   1  17  -2   15.29    6.29
   0 -17  -2   56.08    8.53
   0 -17   2   45.44    7.45
   0  17  -2   55.56    8.03
   0  17   2   48.06    8.02
   1 -17   2   46.30    7.21
  -1 -17  -2   71.32    8.84
   1  17   2   56.85    8.19
  -1  17  -2   42.60    7.73
  -2 -17  -2   21.30    6.35
   2 -17   2   30.18    6.71
   2  17   2   20.66    6.22
  -2  17  -2   26.50    6.76
  -2  17  -2   20.27    6.36
  -3 -17  -2    4.50    5.22
  -3  17  -2    3.40    4.47
  -3  17  -2   -3.12    4.27
  -3  17  -2    7.19    5.23
   3  17   2    3.38    4.79
  -4 -17  -2   -3.93    4.61
  -4  17  -2    1.12    4.27
  -4  17  -2   -0.10    5.00
  -4  17  -2   -1.07    4.32
  -5 -17  -2   21.67    6.93
  -5  17  -2   11.75    5.03
  -5  17  -2    7.07    5.86
  -5  17  -2   14.89    6.00
  -6 -17  -2   15.64    6.66
  -6  17  -2    2.44    5.25
  -6  17  -2   -2.52    4.11
  -6  17  -2    3.75    6.17
  -7 -17  -2   13.91    6.29
  -7 -17  -2   23.84    7.25
  -7  17  -2    9.95    6.62
  -7  17  -2    6.75    5.72
  -7  17  -2   16.02    7.03
  -8 -17  -2    7.41    7.05
  -8  17  -2    7.07    6.15
  -8  17  -2   -1.39    5.35
  -8  17  -2    2.68    5.93
  -7 -18   2   19.14    7.46
  -7 -18   2   24.52    7.64
  -7  18   2   23.38    7.88
  -7  18   2   25.07    8.15
  -6 -18   2   14.98    6.55
  -6 -18   2   23.33    7.04
  -6  18   2   18.77    7.44
  -6  18   2   25.39    8.02
  -5 -18   2    2.82    5.69
  -5  18   2    2.33    6.05
  -5  18   2   -0.37    5.19
  -4 -18   2  102.95   11.35
  -4  18   2   84.54   11.09
  -4  18   2   78.22    9.89
  -3 -18   2   87.09   10.24
  -3  18   2   81.27    9.99
  -2 -18   2   16.65    5.95
   2  18  -2    5.76    5.50
  -2  18   2   17.71    6.21
  -1 -18   2   42.81    7.87
   1 -18  -2   34.94    7.10
   1  18  -2   38.16    7.93
  -1  18   2   22.71    6.98
   0 -18   2  105.27   10.83
   0 -18  -2  113.36   11.49
   0  18  -2   83.44   10.56
   0  18   2   73.13    9.53
   1 -18   2   -6.05    4.00
  -1 -18  -2    2.76    5.12
  -1  18  -2   -1.60    4.68
   1  18   2   -2.54    4.67
   2 -18   2    0.06    4.70
  -2 -18  -2    7.47    5.01
   2  18   2   -1.73    4.49
  -2  18  -2    2.31    4.81
  -2  18  -2    5.18    5.07
  -3 -18  -2   10.77    5.96
   3  18   2   11.31    5.90
  -3  18  -2    6.01    5.54
  -3  18  -2    9.74    5.40
  -4 -18  -2    6.54    6.05
  -4  18  -2    9.39    6.28
  -4  18  -2   11.00    5.83
  -4  18  -2    5.31    5.07
  -5 -18  -2   18.46    7.09
  -5  18  -2   21.42    6.56
  -5  18  -2   17.85    6.96
  -5  18  -2    7.43    5.61
  -6 -18  -2    5.66    6.57
  -6  18  -2   -0.74    5.93
  -6  18  -2    1.35    5.08
  -6  18  -2    1.34    5.64
  -7 -18  -2   42.80    9.43
  -7  18  -2   22.95    7.69
  -7  18  -2   34.47    7.92
  -7  18  -2   21.40    6.84
  -6 -19   2    8.45    6.99
  -6  19   2   15.03    6.65
  -6  19   2    7.66    6.71
  -5 -19   2   -0.75    5.19
  -5  19   2    6.13    6.74
  -5  19   2    9.88    6.50
  -4 -19   2   -5.86    4.73
  -4  19   2    2.93    5.92
  -3 -19   2    4.95    5.82
  -3  19   2   -1.62    5.27
  -2 -19   2   17.51    6.73
  -2  19   2   17.50    6.96
   2  19  -2   10.16    6.38
  -1 -19   2   20.34    6.80
   1 -19  -2   14.95    6.08
  -1  19   2    9.97    6.63
   1  19  -2   14.41    6.06
   0 -19  -2   44.35    8.23
   0 -19   2   33.86    7.67
   0  19   2   46.32    8.17
   0  19  -2   23.37    6.93
  -1 -19  -2   -1.88    5.80
   1 -19   2    9.07    5.41
   1  19   2    6.66    5.78
  -1  19  -2    5.88    5.26
  -2 -19  -2   10.95    5.98
  -2  19  -2   -3.35    5.10
   2  19   2    5.16    5.33
  -3 -19  -2    2.57    5.50
  -3  19  -2    3.77    4.63
  -3  19  -2    4.14    5.48
  -4 -19  -2    6.02    5.96
  -4  19  -2   -2.50    5.06
  -4  19  -2    3.70    4.83
  -4  19  -2    0.22    5.46
  -5 -19  -2   18.98    7.18
  -5  19  -2   10.63    6.61
  -5  19  -2   15.93    6.32
  -5  19  -2   22.80    7.66
  -6 -19  -2   22.48    7.45
  -6  19  -2   22.40    7.53
  -6  19  -2    8.43    5.88
  -6  19  -2   29.69    9.10
  -5 -20   2   12.05    7.20
  -5  20   2   -5.96    5.61
  -4 -20   2   14.32    6.76
  -4  20   2   16.67    7.02
  -3 -20   2   21.37    7.51
  -3  20   2   22.98    7.36
  -2 -20   2    2.14    5.57
  -2  20   2    1.27    5.76
  -1 -20   2   30.14    7.71
  -1  20   2   18.32    7.00
   1  20  -2   17.26    7.10
   0 -20  -2    1.62    5.92
   0 -20   2   -5.26    4.78
   0  20  -2    2.08    6.00
   0  20   2   -3.70    5.09
   1 -20   2    3.23    5.62
  -1 -20  -2    8.85    6.17
   1  20   2   -9.10    5.19
  -1  20  -2    3.62    5.65
  -2 -20  -2   20.90    7.72
  -2  20  -2   24.66    7.67
   2  20   2   21.72    7.28
  -3 -20  -2    8.53    6.49
  -3  20  -2    3.32    5.75
  -4 -20  -2   12.12    6.80
  -4  20  -2   -1.12    5.88
  -4  20  -2    5.86    5.24
  -3 -21   2   -0.52    5.88
  -3  21   2   -8.14    5.64
  -2 -21   2  115.01   13.11
  -2  21   2   95.06   12.13
  -1 -21   2   48.28    9.15
   1  21  -2   44.50    9.63
  -1  21   2   51.05    9.63
   0 -21  -2   25.38    7.98
   0 -21   2   14.18    7.44
   0  21  -2   24.41    7.24
   0  21   2   26.27    7.62
  -1 -21  -2    1.23    5.61
   1 -21   2   -5.81    5.70
   1  21   2    6.49    6.54
  -1  21  -2   -7.31    5.51
  -2 -21  -2   88.65   11.79
   2  21   2   67.55   10.80
  -2  21  -2   62.95   10.35
  -3 -21  -2    4.59    6.29
  -3  21  -2   16.40    7.68
 -12   0   3   -3.10    3.53
 -11   0   3   -0.31    3.51
 -11   0   3    0.62    3.33
 -10   0   3   -0.19    2.77
  -9   0   3   -0.56    2.77
  -9   0   3    2.96    2.92
  -8   0   3   -2.92    2.33
  -8   0   3   -2.06    2.59
  -7   0   3   -1.86    2.06
  -7   0   3   -3.41    1.76
  -6   0   3    1.77    2.27
  -6   0   3    1.48    1.96
  -5   0   3   -3.02    1.73
  -5   0   3   -0.91    1.75
  -4   0   3    2.40    1.77
  -4   0   3   -1.35    1.55
  -3   0   3    1.10    1.76
  -3   0   3   -1.80    1.33
  -2   0   3   -0.03    0.79
  -2   0   3   -2.62    1.00
  -2   0   3   -1.29    1.03
  -2   0   3   -0.65    1.53
  -2   0   3   -2.12    0.94
  -2   0   3   -0.50    0.76
  -1   0   3    0.75    1.34
  -1   0   3    0.08    1.04
  -1   0   3   -0.48    1.13
  -1   0   3   -1.05    1.19
  -1   0   3   -0.25    1.06
   1   0  -3    0.06    1.14
   0   0   3    0.69    1.07
   0   0  -3    2.72    1.45
   0   0  -3    1.96    1.21
   0   0   3   -0.62    1.21
   0   0   3   -1.39    1.27
   1   0   3   -1.21    1.40
   1   0   3   -0.21    1.34
  -1   0  -3    3.84    1.92
  -1   0  -3   -0.74    1.38
  -1   0  -3    0.25    1.49
  -2   0  -3   -0.84    1.53
  -2   0  -3   -1.21    1.55
  -2   0  -3   -0.74    1.70
  -2   0  -3   -0.36    1.43
  -2   0  -3   -2.74    1.45
   2   0   3    1.22    1.49
  -3   0  -3   -1.83    1.47
  -3   0  -3   -0.51    1.52
  -3   0  -3   -0.69    1.51
  -3   0  -3   -1.99    1.38
  -3   0  -3   -0.58    1.79
   3   0   3    0.60    1.52
  -4   0  -3   -0.21    1.57
   4   0   3    0.20    1.49
  -4   0  -3   -1.32    1.72
  -4   0  -3   -3.73    1.50
  -4   0  -3   -2.66    1.91
  -4   0  -3    1.28    1.69
  -4   0  -3   -1.12    1.43
   5   0   3   -0.92    1.34
  -5   0  -3   -1.35    1.89
  -5   0  -3   -2.71    1.58
  -5   0  -3   -3.48    1.68
  -5   0  -3   -1.48    1.51
  -5   0  -3    0.91    1.74
  -5   0  -3    1.15    2.28
  -6   0  -3   -0.70    1.61
  -6   0  -3    0.09    1.91
  -6   0  -3   -0.77    2.26
  -6   0  -3    2.91    2.15
  -6   0  -3   -0.97    1.42
  -6   0  -3    0.00    1.73
  -7   0  -3   -1.22    2.66
  -7   0  -3   -0.87    2.06
  -7   0  -3    2.65    2.15
  -7   0  -3    0.36    2.20
  -7   0  -3    0.61    1.75
  -7   0  -3   -1.71    1.82
  -8   0  -3   -0.21    2.14
  -8   0  -3    4.38    3.60
  -8   0  -3    0.03    2.11
  -8   0  -3    0.43    2.48
  -8   0  -3    0.80    2.27
  -9   0  -3   -1.36    3.36
  -9   0  -3   -1.56    2.74
  -9   0  -3    4.54    2.87
  -9   0  -3    2.49    2.52
  -9   0  -3   -2.40    2.71
 -10   0  -3    0.25    2.84
 -10   0  -3    2.88    2.76
 -10   0  -3    1.01    3.88
 -10   0  -3   -3.32    2.51
 -11   0  -3    3.18    3.42
 -11   0  -3    3.75    3.69
 -11   0  -3    3.64    3.36
 -11   0  -3    1.20    4.50
 -11   0  -3    0.85    3.35
 -12   0  -3   -1.00    3.56
 -12   0  -3   -4.17    3.30
 -12   0  -3   -5.64    3.67
 -12   0  -3   11.91    5.55
 -12   0  -3    2.69    4.18
 -12   1   3    1.58    4.29
 -11  -1   3   16.97    4.85
 -11  -1   3   18.04    5.15
 -11   1   3   15.39    5.05
 -11   1   3   11.13    4.46
 -10  -1   3   47.48    6.62
 -10  -1   3   38.76    5.51
 -10   1   3   44.77    6.24
 -10   1   3   39.26    6.09
  -9  -1   3    4.83    3.54
  -9  -1   3    5.30    3.13
  -9   1   3    4.53    3.43
  -9   1   3    1.35    3.01
  -8  -1   3   11.49    3.65
  -8  -1   3   14.26    3.45
  -8   1   3   14.69    3.84
  -8   1   3    9.23    3.38
  -7  -1   3  274.82    9.44
  -7  -1   3  262.21   10.16
  -7   1   3  294.66   10.08
  -7   1   3  287.91   10.20
  -6  -1   3  249.89    9.28
  -6  -1   3  264.92    8.52
  -6   1   3  265.25    9.13
  -6   1   3  285.53    9.30
  -5  -1   3  125.69    5.20
  -5  -1   3  119.27    6.05
  -5   1   3  120.71    5.74
  -5   1   3  113.27    5.62
  -4  -1   3    1.92    1.64
  -4  -1   3    2.98    1.97
  -4   1   3    3.07    1.91
  -4   1   3    2.22    1.98
  -3  -1   3  198.85    5.44
  -3  -1   3  200.79    6.65
  -3   1   3  211.22    6.28
  -3   1   3  198.45    6.40
  -2  -1   3  317.54    6.59
  -2  -1   3  304.58    6.44
  -2  -1   3  315.02    7.97
  -2  -1   3  316.21    6.99
  -2  -1   3  307.75    7.01
  -2  -1   3  296.94    6.58
  -2   1   3  299.06    6.82
  -2   1   3  299.92    7.47
  -2   1   3  296.00    7.75
  -2   1   3  301.18    6.33
  -2   1   3  305.84    6.31
  -2   1   3  306.92    6.51
  -2   1   3  303.79    6.83
  -1  -1   3   13.27    1.60
  -1  -1   3   13.76    1.79
  -1  -1   3   14.69    2.00
  -1  -1   3   11.91    1.70
   1  -1  -3   14.21    1.75
  -1  -1   3   14.04    1.84
  -1   1   3   13.57    1.77
  -1   1   3   12.42    1.87
  -1   1   3   15.89    1.99
  -1   1   3   13.23    1.70
  -1   1   3   14.84    1.77
   1   1  -3   18.85    1.92
   0  -1  -3   55.89    3.07
   0  -1   3   57.70    3.16
   0  -1   3   54.78    2.74
   0  -1   3   50.85    3.18
   0   1   3   61.08    3.12
   0   1   3   52.45    3.11
   0   1   3   53.38    3.26
   0   1  -3   60.08    3.37
   0   1  -3   56.79    2.73
   1  -1   3  349.90    7.27
  -1  -1  -3  338.70    8.73
  -1  -1  -3  340.23    8.51
   1  -1   3  340.66    8.70
   1  -1   3  342.47    8.34
  -1  -1  -3  327.06    8.18
  -1   1  -3  344.83    8.15
  -1   1  -3  322.55    8.63
  -1   1  -3  340.12    8.56
   1   1   3  349.71    8.42
   1   1   3  336.65    8.71
  -2  -1  -3  141.82    5.34
  -2  -1  -3  132.26    5.23
  -2  -1  -3  151.60    5.57
  -2  -1  -3  141.18    5.41
   2  -1   3  138.82    5.02
  -2   1  -3  128.88    5.38
  -2   1  -3  146.59    5.31
  -2   1  -3  139.59    5.14
   2   1   3  146.33    5.14
  -2   1  -3  145.34    5.46
  -2   1  -3  133.81    5.38
  -3  -1  -3   45.97    3.76
   3  -1   3   45.51    3.28
  -3  -1  -3   40.08    3.52
  -3  -1  -3   36.79    3.35
  -3  -1  -3   46.54    3.52
  -3  -1  -3   44.72    4.09
  -3   1  -3   47.98    3.74
   3   1   3   42.39    3.44
  -3   1  -3   47.12    3.83
  -3   1  -3   45.39    4.23
  -3   1  -3   45.75    3.71
  -3   1  -3   48.11    3.88
  -4  -1  -3 1064.88   21.91
   4  -1   3 1082.52   21.07
  -4  -1  -3 1061.28   22.61
  -4  -1  -3 1046.76   22.34
  -4  -1  -3 1059.18   22.04
  -4  -1  -3 1110.16   22.12
  -4  -1  -3 1080.77   22.66
  -4   1  -3 1037.08   21.78
  -4   1  -3 1068.04   22.08
  -4   1  -3 1065.08   22.43
  -4   1  -3 1047.67   22.70
  -4   1  -3 1041.35   22.38
  -4   1  -3 1098.70   22.12
   4   1   3 1076.22   21.18
  -5  -1  -3 1038.74   22.04
  -5  -1  -3 1030.47   22.19
  -5  -1  -3 1049.98   23.28
   5  -1   3 1035.14   20.62
  -5  -1  -3 1076.09   22.27
  -5  -1  -3  994.35   22.37
  -5  -1  -3 1060.44   22.80
  -5   1  -3 1056.77   22.28
  -5   1  -3 1060.08   23.49
  -5   1  -3 1045.30   22.04
  -5   1  -3 1049.57   22.70
  -5   1  -3 1083.94   22.34
   5   1   3 1047.95   20.77
  -5   1  -3 1046.17   22.47
  -6  -1  -3   25.05    3.39
  -6  -1  -3   28.27    3.75
  -6  -1  -3   21.16    3.42
  -6  -1  -3   26.00    4.18
  -6  -1  -3   29.74    3.65
  -6  -1  -3   24.96    3.62
  -6   1  -3   19.29    2.95
  -6   1  -3   30.27    3.99
  -6   1  -3   27.52    3.48
  -6   1  -3   34.25    4.96
  -6   1  -3   23.27    3.46
  -6   1  -3   24.74    3.43
  -7  -1  -3   10.36    3.16
  -7  -1  -3   11.17    3.77
  -7  -1  -3   16.78    3.18
  -7  -1  -3   14.31    3.12
  -7  -1  -3   19.99    3.41
  -7  -1  -3   18.94    3.28
  -7   1  -3   14.02    2.96
  -7   1  -3   12.62    3.20
  -7   1  -3   14.69    3.29
  -7   1  -3   14.51    4.04
  -7   1  -3   14.46    3.01
  -7   1  -3   13.27    3.09
  -8  -1  -3   48.24    5.22
  -8  -1  -3   43.30    4.95
  -8  -1  -3   38.19    5.91
  -8  -1  -3   44.21    4.83
  -8  -1  -3   37.11    4.74
  -8   1  -3   47.10    5.24
  -8   1  -3   37.71    5.85
  -8   1  -3   43.54    5.04
  -8   1  -3   39.17    4.70
  -8   1  -3   49.71    5.23
  -9  -1  -3   45.74    5.60
  -9  -1  -3   47.10    5.31
  -9  -1  -3   41.66    6.45
  -9  -1  -3   46.65    5.32
  -9  -1  -3   46.40    5.40
  -9   1  -3   42.97    5.57
  -9   1  -3   51.12    5.83
  -9   1  -3   32.67    6.23
  -9   1  -3   49.15    5.51
  -9   1  -3   42.48    5.43
 -10  -1  -3   11.69    4.97
 -10  -1  -3   12.25    4.15
 -10  -1  -3   10.48    3.84
 -10  -1  -3   10.57    3.74
 -10  -1  -3   11.76    3.55
 -10   1  -3    9.57    4.78
 -10   1  -3    8.90    3.47
 -10   1  -3   16.30    4.13
 -10   1  -3    7.86    3.38
 -10   1  -3   15.50    4.10
 -11  -1  -3  126.20   11.42
 -11  -1  -3  138.97    8.74
 -11  -1  -3  135.12    8.90
 -11  -1  -3  123.18    8.91
 -11  -1  -3  119.20    8.83
 -11   1  -3  149.70    9.05
 -11   1  -3  132.39    8.52
 -11   1  -3  119.12    8.68
 -11   1  -3  136.15    8.97
 -11   1  -3  129.62   11.91
 -12  -1  -3   13.27    4.68
 -12  -1  -3   15.17    4.87
 -12  -1  -3   14.59    5.16
 -12  -1  -3    7.26    5.15
 -12  -1  -3   14.45    4.90
 -12   1  -3   14.47    4.60
 -12   1  -3   10.52    5.98
 -12   1  -3   16.03    4.82
 -12   1  -3   20.50    5.21
 -12   1  -3   11.22    4.50
 -13   2   3    4.52    5.28
 -12   2   3  106.00   10.59
 -11   2   3   -3.42    3.60
 -10  -2   3   21.18    4.24
 -10  -2   3   21.18    5.08
 -10   2   3   23.47    5.08
 -10   2   3   21.03    4.74
  -9  -2   3    1.76    2.62
  -9  -2   3    1.64    3.42
  -9   2   3    0.79    3.10
  -9   2   3    0.69    3.27
  -8  -2   3  146.09    8.54
  -8  -2   3  156.21    7.46
  -8   2   3  149.17    8.39
  -8   2   3  151.97    7.67
  -7  -2   3   93.20    5.32
  -7  -2   3   92.89    6.57
  -7   2   3   78.77    6.70
  -7   2   3   81.91    5.58
  -6  -2   3    4.34    1.85
  -6  -2   3    0.41    2.38
  -6   2   3    1.54    2.06
  -6   2   3    3.43    2.45
  -5  -2   3  352.72    8.90
  -5  -2   3  327.10   10.33
  -5   2   3  329.71    9.98
  -5   2   3  335.10    9.72
  -4  -2   3   83.29    2.90
  -4  -2   3   81.63    3.56
  -4  -2   3   77.63    4.87
  -4   2   3   86.38    4.86
  -4   2   3   77.65    4.47
  -3  -2   3  104.91    3.71
  -3  -2   3  106.75    4.97
  -3  -2   3  103.19    3.46
  -3  -2   3  108.57    3.40
  -3  -2   3  105.09    3.72
  -3  -2   3  110.54    3.50
  -3  -2   3  108.82    3.26
  -3   2   3  108.15    4.70
  -3   2   3  102.02    3.46
  -3   2   3  107.83    4.80
  -3   2   3  111.27    3.24
  -2  -2   3    0.65    1.31
  -2  -2   3   -1.94    1.19
  -2  -2   3    0.68    1.13
  -2  -2   3    2.15    1.11
  -2  -2   3    0.14    1.25
  -2  -2   3   -0.22    1.61
   2   2  -3    1.91    1.04
  -2   2   3    0.00    1.20
  -2   2   3    1.48    1.08
  -2   2   3    1.56    1.27
  -2   2   3    0.00    0.97
  -2   2   3    2.00    1.69
  -2   2   3    1.60    1.67
  -2   2   3    1.29    1.24
  -1  -2   3   29.69    2.60
  -1  -2   3   26.09    2.44
  -1  -2   3   24.75    2.11
  -1  -2   3   27.17    2.42
   1  -2  -3   24.83    2.22
  -1  -2   3   28.93    2.54
   1   2  -3   26.90    2.42
  -1   2   3   28.99    2.66
   1   2  -3   24.98    1.61
  -1   2   3   27.35    2.31
  -1   2   3   31.03    2.73
  -1   2   3   31.53    2.53
   0  -2   3  107.95    4.49
   0  -2   3  110.13    3.76
   0  -2  -3  104.45    4.28
   0  -2   3  105.09    4.34
   0   2  -3  109.79    3.65
   0   2   3  107.11    4.36
   0   2  -3  119.37    4.67
   0   2   3  108.13    4.48
  -1  -2  -3   36.23    3.34
   1  -2   3   30.91    2.88
  -1  -2  -3   36.75    3.24
   1  -2   3   31.07    2.88
  -1  -2  -3   35.57    3.13
   1  -2   3   32.18    2.07
   1   2   3   32.10    2.93
  -1   2  -3   31.02    2.77
  -1   2  -3   35.70    3.28
  -1   2  -3   36.40    3.26
   1   2   3   33.43    3.07
  -2  -2  -3  966.55   19.66
  -2  -2  -3  921.64   19.54
   2  -2   3  986.60   19.34
  -2  -2  -3  961.33   19.39
  -2  -2  -3  957.40   20.16
  -2   2  -3  983.95   19.46
   2   2   3  975.08   19.42
  -2   2  -3  986.72   20.14
  -2   2  -3  944.73   19.54
  -2   2  -3  974.41   19.76
  -2   2  -3 1000.61   19.62
  -3  -2  -3  598.83   13.87
   3  -2   3  608.01   13.28
  -3  -2  -3  598.04   13.76
  -3  -2  -3  605.52   14.28
  -3  -2  -3  599.00   14.11
  -3  -2  -3  603.27   13.77
  -3   2  -3  604.79   14.29
  -3   2  -3  581.95   14.05
   3   2   3  594.77   13.39
  -3   2  -3  609.23   13.66
  -3   2  -3  592.46   13.84
  -3   2  -3  591.93   13.71
  -4  -2  -3  321.09    9.84
   4  -2   3  313.65    8.41
  -4  -2  -3  316.98    9.22
  -4  -2  -3  314.42    9.42
  -4  -2  -3  325.34    9.34
  -4  -2  -3  308.14    9.30
  -4  -2  -3  320.81    9.68
  -4   2  -3  315.13    9.17
  -4   2  -3  308.54   10.07
  -4   2  -3  312.04    9.30
   4   2   3  321.79    8.76
  -4   2  -3  321.40    9.57
  -4   2  -3  314.10    9.35
  -4   2  -3  331.34    9.23
  -5  -2  -3    0.40    1.91
   5  -2   3    4.54    1.65
  -5  -2  -3    4.45    1.82
  -5  -2  -3    6.33    2.54
  -5  -2  -3    4.10    2.17
  -5  -2  -3    6.32    2.24
  -5  -2  -3    7.04    2.13
  -5   2  -3    5.55    2.31
   5   2   3    4.06    1.72
  -5   2  -3   -0.50    1.72
  -5   2  -3    3.86    2.18
  -5   2  -3    4.83    1.99
  -5   2  -3    5.17    1.98
  -5   2  -3    9.41    2.93
  -6  -2  -3  356.60   10.61
  -6  -2  -3  335.04   10.79
  -6  -2  -3  322.93   10.28
  -6  -2  -3  336.76   10.63
  -6  -2  -3  338.75   11.52
  -6  -2  -3  324.32   10.33
  -6   2  -3  322.79   10.42
  -6   2  -3  334.19   10.29
  -6   2  -3  347.43   10.75
  -6   2  -3  339.18   10.57
  -6   2  -3  342.10   12.10
  -6   2  -3  338.93   10.23
  -7  -2  -3  118.23    6.49
  -7  -2  -3  125.01    6.34
  -7  -2  -3  118.11    6.63
  -7  -2  -3  112.95    6.56
  -7  -2  -3  129.53    6.56
  -7  -2  -3  117.14    7.66
  -7   2  -3  110.20    6.53
  -7   2  -3  122.78    6.35
  -7   2  -3  117.50    7.85
  -7   2  -3  123.52    6.42
  -7   2  -3  123.02    6.64
  -7   2  -3  121.63    6.45
  -8  -2  -3    3.09    2.89
  -8  -2  -3    5.05    2.68
  -8  -2  -3   10.00    3.12
  -8  -2  -3    6.00    2.86
  -8  -2  -3    2.81    3.25
  -8   2  -3    2.21    2.60
  -8   2  -3    2.17    2.52
  -8   2  -3    4.23    2.78
  -8   2  -3    7.04    2.73
  -8   2  -3    9.41    4.14
  -9  -2  -3  173.99    8.92
  -9  -2  -3  177.35   10.12
  -9  -2  -3  192.99    9.27
  -9  -2  -3  187.62    8.74
  -9  -2  -3  190.88    9.12
  -9   2  -3  188.04    8.78
  -9   2  -3  183.65    8.78
  -9   2  -3  184.62    8.89
  -9   2  -3  180.88    8.88
  -9   2  -3  162.02   10.53
 -10  -2  -3   48.95    5.87
 -10  -2  -3   45.36    6.91
 -10  -2  -3   52.24    6.07
 -10  -2  -3   54.97    6.25
 -10  -2  -3   53.07    6.41
 -10   2  -3   50.94    5.80
 -10   2  -3   49.17    7.53
 -10   2  -3   43.86    5.65
 -10   2  -3   49.48    5.95
 -11  -2  -3    6.14    4.14
 -11  -2  -3    9.20    4.01
 -11  -2  -3   14.78    5.24
 -11  -2  -3    8.64    3.92
 -11  -2  -3   13.41    4.40
 -11   2  -3   16.93    4.83
 -11   2  -3    7.50    4.36
 -11   2  -3   14.49    5.97
 -11   2  -3   12.54    3.90
 -11   2  -3   12.98    4.11
 -12  -2  -3    0.17    3.65
 -12  -2  -3    4.16    4.90
 -12  -2  -3   10.24    4.57
 -12  -2  -3    9.86    4.59
 -12  -2  -3   10.37    4.59
 -12   2  -3    8.44    4.41
 -12   2  -3    9.40    5.66
 -12   2  -3    9.79    4.41
 -12   2  -3    8.74    4.57
 -12   2  -3   15.46    4.75
 -13   3   3   -1.09    5.00
 -12  -3   3    7.31    2.70
 -12   3   3    2.67    5.19
 -11  -3   3    5.31    2.71
 -11  -3   3    0.10    2.27
 -11   3   3    3.53    4.28
 -10  -3   3    2.27    2.81
 -10  -3   3    1.72    3.69
 -10   3   3   -1.98    2.87
 -10   3   3    1.16    3.53
  -9  -3   3  180.84    8.46
  -9  -3   3  172.99   10.00
  -9  -3   3  185.81    6.49
  -9   3   3  179.02    9.90
  -9   3   3  178.34    8.82
  -8  -3   3   70.87    5.29
  -8  -3   3   62.25    6.80
  -8   3   3   77.35    7.25
  -8   3   3   70.72    6.28
  -7  -3   3   33.64    5.21
  -7  -3   3   34.11    3.83
  -7  -3   3   33.00    2.73
  -7   3   3   37.65    4.96
  -7   3   3   38.65    4.46
  -6  -3   3    5.61    2.79
  -6  -3   3    5.10    1.36
  -6  -3   3    3.31    1.21
  -6  -3   3    7.13    2.08
  -6   3   3    7.41    2.39
  -6   3   3    4.38    2.64
  -5  -3   3    5.10    1.33
  -5  -3   3    2.37    1.20
  -5  -3   3    4.15    1.43
  -5  -3   3    5.59    1.72
  -5  -3   3    7.05    2.62
  -5  -3   3    4.92    1.37
  -5  -3   3    6.97    1.54
  -5   3   3    8.95    2.45
  -5   3   3    6.01    2.79
  -4  -3   3  155.62    6.65
  -4  -3   3  163.52    4.62
  -4  -3   3  151.56    4.55
  -4  -3   3  152.72    4.81
  -4  -3   3  153.48    4.99
  -4  -3   3  162.37    4.73
  -4  -3   3  161.75    5.09
  -4   3   3  158.75    6.56
  -4   3   3  162.69    4.50
  -4   3   3  153.79    4.69
  -4   3   3  164.84    6.04
  -3  -3   3  414.70    9.18
  -3  -3   3  394.06    9.47
  -3  -3   3  422.34    9.22
  -3  -3   3  414.00    9.54
  -3  -3   3  410.11    7.82
  -3  -3   3  405.03    9.00
  -3  -3   3  405.35   10.75
  -3   3   3  405.56    9.24
  -3   3   3  410.02   10.53
  -3   3   3  405.82    9.20
  -3   3   3  418.60    8.69
  -3   3   3  399.55    9.93
  -3   3   3  408.68    8.82
  -3   3   3  421.08    8.91
  -2  -3   3  412.54   10.18
  -2  -3   3  407.03    9.44
  -2  -3   3  404.54    9.76
   2  -3  -3  404.65    8.86
  -2  -3   3  422.69    9.50
  -2  -3   3  422.50    9.36
  -2  -3   3  421.88    9.84
  -2   3   3  414.23   10.16
  -2   3   3  414.44    9.34
  -2   3   3  415.14    9.80
  -2   3   3  427.57    9.66
  -2   3   3  423.12    9.14
  -2   3   3  413.59    9.31
  -2   3   3  409.05    9.62
   2   3  -3  419.86    9.10
  -1  -3   3 1727.71   31.95
  -1  -3   3 1681.68   31.77
  -1  -3   3 1766.63   31.07
  -1  -3   3 1756.96   32.68
   1  -3  -3 1780.55   31.70
  -1  -3   3 1724.44   31.80
  -1   3   3 1786.70   32.48
   1   3  -3 1769.03   31.84
  -1   3   3 1770.35   31.93
  -1   3   3 1766.14   31.81
  -1   3   3 1756.31   31.68
   1   3  -3 1756.25   29.02
  -1   3   3 1746.63   31.26
   0  -3   3  847.59   15.98
   0  -3  -3  885.73   17.53
   0  -3   3  876.34   17.49
   0  -3  -3  879.77   18.08
   0   3  -3  868.43   15.91
   0   3  -3  874.38   17.65
   0   3   3  866.00   17.50
   0   3   3  872.40   17.94
   0   3  -3  824.12   17.91
   1  -3   3  362.27    9.75
  -1  -3  -3  366.98    9.54
  -1  -3  -3  369.14    9.85
   1  -3   3  388.87    9.51
  -1   3  -3  366.49    9.79
   1   3   3  383.35    9.55
  -1   3  -3  382.58    8.96
   1   3   3  378.89    9.90
  -1   3  -3  376.18    9.69
  -2  -3  -3   -0.18    1.67
  -2  -3  -3    2.06    1.75
   2  -3   3    0.20    1.57
  -2  -3  -3   -1.13    1.42
  -2  -3  -3   -0.31    1.50
  -2   3  -3   -0.49    1.80
  -2   3  -3    0.84    1.83
   2   3   3   -1.31    1.55
  -2   3  -3    0.07    1.64
  -2   3  -3    1.52    1.51
  -3  -3  -3    9.35    2.40
   3  -3   3    7.56    2.03
  -3  -3  -3    7.90    2.36
  -3  -3  -3    8.41    2.32
  -3  -3  -3    8.97    2.25
  -3  -3  -3    6.92    2.11
  -3   3  -3    9.34    2.51
   3   3   3    9.85    2.22
  -3   3  -3   11.27    2.52
  -3   3  -3   10.71    2.47
  -3   3  -3    3.38    1.83
  -3   3  -3    6.48    2.14
  -4  -3  -3    0.27    1.41
  -4  -3  -3    3.58    2.00
  -4  -3  -3    1.78    1.90
  -4  -3  -3   -2.30    1.86
   4  -3   3    3.46    1.64
  -4  -3  -3    0.72    2.01
  -4  -3  -3    3.35    2.21
  -4   3  -3    2.01    2.33
  -4   3  -3    1.20    1.78
  -4   3  -3    2.71    1.99
  -4   3  -3    3.12    1.83
  -4   3  -3    3.08    2.08
   4   3   3    5.15    1.83
  -4   3  -3    2.87    2.09
  -5  -3  -3   76.91    4.87
  -5  -3  -3   74.92    5.09
  -5  -3  -3   68.88    4.73
  -5  -3  -3   68.01    5.14
  -5  -3  -3   65.50    4.71
   5  -3   3   75.73    3.92
  -5  -3  -3   74.13    4.75
   5   3   3   64.82    4.10
  -5   3  -3   69.74    4.99
  -5   3  -3   67.07    4.78
  -5   3  -3   64.49    4.63
  -5   3  -3   75.77    4.70
  -5   3  -3   78.63    4.66
  -5   3  -3   61.61    5.79
  -6  -3  -3    0.32    1.75
  -6  -3  -3   -2.66    1.92
  -6  -3  -3   -0.24    1.73
  -6  -3  -3   -2.36    2.36
  -6  -3  -3   -0.02    1.59
  -6  -3  -3    1.96    2.19
  -6   3  -3    2.05    2.00
  -6   3  -3   -0.76    2.62
  -6   3  -3    0.99    1.81
  -6   3  -3    2.28    2.13
  -6   3  -3   -1.83    1.87
  -6   3  -3   -0.80    1.70
  -7  -3  -3   -0.35    1.97
  -7  -3  -3   -1.01    2.47
  -7  -3  -3    3.84    2.09
  -7  -3  -3    3.74    2.66
  -7  -3  -3   -1.85    2.22
  -7   3  -3    0.70    2.21
  -7   3  -3    2.54    2.37
  -7   3  -3    0.15    2.16
  -7   3  -3   -2.42    2.31
  -7   3  -3   -1.68    1.89
  -7   3  -3    4.81    3.45
  -8  -3  -3   19.79    3.73
  -8  -3  -3   17.11    3.76
  -8  -3  -3   12.75    3.16
  -8  -3  -3   16.48    4.40
  -8  -3  -3   13.17    3.31
  -8   3  -3   18.98    4.88
  -8   3  -3   13.53    3.41
  -8   3  -3   11.04    3.40
  -8   3  -3   16.43    3.41
  -8   3  -3   20.68    4.17
  -9  -3  -3   -0.59    2.76
  -9  -3  -3    0.82    2.67
  -9  -3  -3    2.87    2.61
  -9  -3  -3    3.85    3.52
  -9  -3  -3   -2.20    2.51
  -9   3  -3    3.17    3.04
  -9   3  -3   -1.67    2.59
  -9   3  -3    2.02    2.52
  -9   3  -3    4.70    3.17
  -9   3  -3   -3.04    3.48
 -10  -3  -3   -1.76    3.60
 -10  -3  -3    4.44    3.22
 -10  -3  -3    0.51    3.17
 -10  -3  -3    2.11    3.24
 -10  -3  -3    0.81    3.37
 -10   3  -3    2.49    3.22
 -10   3  -3   -3.04    2.85
 -10   3  -3   -2.77    2.66
 -10   3  -3   -0.77    4.48
 -10   3  -3   -3.17    2.78
 -11  -3  -3   -2.55    2.90
 -11  -3  -3    8.93    4.29
 -11  -3  -3    6.72    3.79
 -11  -3  -3    2.14    3.54
 -11  -3  -3   -0.90    3.97
 -11   3  -3    9.86    5.57
 -11   3  -3    0.98    3.36
 -11   3  -3    2.56    3.22
 -11   3  -3    1.30    3.51
 -11   3  -3    5.70    3.94
 -12  -3  -3    5.33    4.61
 -12  -3  -3    1.85    4.18
 -12  -3  -3   -4.35    3.67
 -12  -3  -3   -1.24    3.16
 -12   3  -3    2.25    5.34
 -12   3  -3   -2.77    3.38
 -12   3  -3    0.41    3.91
 -12   3  -3   -3.06    3.66
 -12   3  -3    2.68    4.38
 -13  -4   3   48.11    5.51
 -13  -4   3   31.55    5.05
 -13   4   3   39.40    7.95
 -12  -4   3   56.03    5.75
 -12  -4   3   48.09    5.20
 -12   4   3   51.32    8.30
 -11  -4   3   23.85    3.65
 -11  -4   3   23.72    3.75
 -11   4   3   21.29    6.09
 -10  -4   3    1.77    4.32
 -10  -4   3    3.46    2.33
 -10  -4   3   -3.36    1.89
 -10  -4   3   -1.22    2.33
 -10   4   3    0.07    3.97
  -9  -4   3   76.25    4.75
  -9  -4   3   80.54    6.75
  -9  -4   3   86.41    4.98
  -9  -4   3   88.47    8.44
  -9  -4   3   70.18    4.70
  -9   4   3   84.29    7.11
  -9   4   3   87.12    8.72
  -9   4   3   76.23    4.34
  -8  -4   3  159.12    6.04
  -8  -4   3  165.31    7.22
  -8  -4   3  161.52    9.46
  -8  -4   3  164.21    6.03
  -8  -4   3  161.49    6.04
  -8   4   3  164.17    5.70
  -8   4   3  153.66    7.65
  -8   4   3  159.42    9.20
  -7  -4   3   26.45    4.61
  -7  -4   3   32.05    2.95
  -7  -4   3   24.45    2.62
  -7  -4   3   23.56    3.33
  -7  -4   3   27.06    2.74
  -7   4   3   20.78    4.35
  -7   4   3   28.04    2.76
  -7   4   3   26.49    3.76
  -6  -4   3    1.55    1.41
  -6  -4   3    2.88    1.51
  -6  -4   3    1.48    1.34
  -6  -4   3   -0.07    1.23
  -6  -4   3    1.38    1.51
  -6  -4   3    0.92    1.46
  -6  -4   3   -1.47    2.24
  -6   4   3   -0.95    1.32
  -6   4   3    4.67    2.06
  -6   4   3   -0.81    2.33
  -5  -4   3  112.85    6.42
  -5  -4   3  112.11    4.35
  -5  -4   3  109.43    4.15
  -5  -4   3  109.73    4.42
  -5  -4   3  109.32    4.56
  -5  -4   3  106.46    4.36
  -5  -4   3  108.09    4.67
  -5   4   3  105.97    4.23
  -5   4   3   99.14    5.97
  -5   4   3  110.14    3.93
  -5   4   3  118.73    4.22
  -5   4   3  101.13    3.91
  -5   4   3  118.73    5.35
  -4  -4   3  275.18    7.42
  -4  -4   3  283.68    9.39
  -4  -4   3  284.08    7.83
  -4  -4   3  278.21    7.31
  -4  -4   3  279.96    7.72
  -4  -4   3  275.63    6.22
  -4  -4   3  275.58    7.45
  -4   4   3  273.07    7.35
  -4   4   3  269.69    7.13
  -4   4   3  286.35    6.93
  -4   4   3  273.85    7.00
  -4   4   3  272.09    8.02
  -4   4   3  273.97    8.99
  -4   4   3  274.99    7.33
  -3  -4   3   76.23    3.97
  -3  -4   3   76.79    3.92
  -3  -4   3   78.03    3.68
  -3  -4   3   79.73    4.76
  -3  -4   3   78.86    3.90
  -3  -4   3   76.79    3.80
  -3   4   3   77.52    3.68
  -3   4   3   77.31    4.19
  -3   4   3   70.90    4.67
  -3   4   3   77.60    3.79
  -3   4   3   81.43    3.94
  -3   4   3   80.28    3.83
  -3   4   3   80.05    3.59
   3   4  -3   79.89    3.37
   2  -4  -3  958.11   18.48
  -2  -4   3  951.53   19.11
  -2  -4   3  967.98   19.20
  -2  -4   3  966.71   19.41
  -2  -4   3  966.00   18.98
  -2  -4   3  959.20   19.63
  -2   4   3  943.71   19.47
  -2   4   3  917.46   19.30
  -2   4   3  937.16   18.89
  -2   4   3  960.88   18.91
  -2   4   3  948.83   19.34
  -2   4   3  996.18   18.85
   2   4  -3  966.97   18.79
  -2   4   3  950.98   18.96
  -1  -4   3 2266.07   40.42
   1  -4  -3 2288.36   40.27
  -1  -4   3 2179.60   40.30
  -1  -4   3 2204.50   41.24
  -1  -4   3 2237.00   39.11
   1   4  -3 2240.32   36.78
  -1   4   3 2212.28   39.30
  -1   4   3 2270.61   41.18
  -1   4   3 2177.23   40.39
   1   4  -3 2248.28   40.29
  -1   4   3 2198.48   40.22
  -1   4   3 2257.38   40.28
   0  -4  -3  384.76   10.32
   0  -4   3  409.18   10.18
   0  -4   3  417.55    8.95
   0  -4  -3  387.53   10.09
   0  -4   3  424.31   10.59
   0   4  -3  395.85   10.24
   0   4   3  415.73   10.36
   0   4   3  406.51   10.45
   0   4  -3  415.92   10.58
   0   4  -3  395.39    8.60
  -1  -4  -3   81.93    4.66
   1  -4   3   79.63    4.54
  -1  -4  -3   84.86    4.60
   1  -4   3   79.20    4.42
   1   4   3   91.41    4.90
  -1   4  -3   81.05    4.67
  -1   4  -3   81.01    4.66
  -1   4  -3   86.28    4.07
   2  -4   3  176.11    6.28
  -2  -4  -3  166.81    6.46
  -2  -4  -3  161.82    6.35
  -2  -4  -3  175.46    6.68
  -2  -4  -3  170.95    6.24
  -2   4  -3  174.39    6.48
  -2   4  -3  166.47    6.59
  -2   4  -3  164.13    6.32
  -2   4  -3  176.71    6.46
   2   4   3  176.72    6.52
  -2   4  -3  170.91    6.61
  -3  -4  -3  602.24   14.48
  -3  -4  -3  647.13   14.62
   3  -4   3  596.53   13.84
  -3  -4  -3  604.09   14.97
  -3  -4  -3  613.22   14.38
  -3  -4  -3  579.83   14.43
  -3   4  -3  600.10   14.67
  -3   4  -3  592.66   14.29
  -3   4  -3  583.84   14.51
  -3   4  -3  601.31   14.26
  -3   4  -3  604.33   14.82
   3   4   3  596.87   14.10
  -4  -4  -3  232.64    8.48
  -4  -4  -3  237.47    8.20
   4  -4   3  240.48    7.48
  -4  -4  -3  239.39    8.44
  -4  -4  -3  234.51    8.34
  -4  -4  -3  250.18    8.31
   4   4   3  250.51    7.84
  -4   4  -3  232.73    7.94
  -4   4  -3  240.96    8.43
  -4   4  -3  234.83    8.20
  -4   4  -3  238.24    8.94
  -4   4  -3  237.52    8.15
  -4   4  -3  223.62    8.25
  -5  -4  -3   46.99    4.82
  -5  -4  -3   44.58    4.52
  -5  -4  -3   61.91    5.37
  -5  -4  -3   50.52    4.91
   5  -4   3   46.80    3.52
  -5  -4  -3   54.54    4.99
  -5  -4  -3   63.27    4.58
  -5   4  -3   51.06    4.74
  -5   4  -3   52.01    4.66
  -5   4  -3   58.98    5.93
  -5   4  -3   51.84    4.53
   5   4   3   49.29    4.24
  -5   4  -3   61.24    5.25
  -5   4  -3   50.52    4.62
  -6  -4  -3   77.00    5.79
  -6  -4  -3   81.18    5.61
  -6  -4  -3   85.97    5.45
  -6  -4  -3   89.58    6.20
  -6  -4  -3   87.00    5.68
  -6  -4  -3   79.62    5.28
  -6   4  -3   73.65    6.76
  -6   4  -3   84.49    5.81
  -6   4  -3   95.96    5.59
  -6   4  -3   86.34    5.47
  -6   4  -3   83.96    5.84
  -6   4  -3   85.78    5.41
  -7  -4  -3  341.87   12.02
  -7  -4  -3  340.20   11.61
  -7  -4  -3  350.46   11.55
  -7  -4  -3  338.30   11.35
  -7  -4  -3  349.17   12.48
  -7   4  -3  352.44   11.40
  -7   4  -3  331.00   11.48
  -7   4  -3  352.43   11.23
  -7   4  -3  335.98   11.47
  -7   4  -3  332.01   13.11
  -8  -4  -3    6.42    2.91
  -8  -4  -3    1.83    2.77
  -8  -4  -3    3.03    3.07
  -8  -4  -3    7.59    3.45
  -8  -4  -3   -0.07    2.58
  -8   4  -3    2.16    2.52
  -8   4  -3    6.48    3.17
  -8   4  -3   -0.56    3.31
  -8   4  -3    3.44    3.04
  -8   4  -3    5.76    2.73
  -9  -4  -3  109.12    7.69
  -9  -4  -3  104.95    8.55
  -9  -4  -3  101.54    7.44
  -9  -4  -3  118.43    8.44
  -9  -4  -3  123.14    7.54
  -9   4  -3   95.32    7.24
  -9   4  -3  101.45    7.35
  -9   4  -3   99.88    7.13
  -9   4  -3  116.91    7.52
  -9   4  -3   87.71    9.30
 -10  -4  -3   23.99    4.61
 -10  -4  -3   19.27    4.67
 -10  -4  -3   17.47    4.61
 -10  -4  -3   13.73    4.30
 -10  -4  -3   18.39    5.14
 -10   4  -3   16.19    4.31
 -10   4  -3   12.65    4.13
 -10   4  -3   18.82    4.26
 -10   4  -3   18.41    6.16
 -10   4  -3   23.46    4.63
 -11  -4  -3    2.29    3.92
 -11  -4  -3   10.40    4.41
 -11  -4  -3    7.29    4.44
 -11  -4  -3    7.11    4.02
 -11  -4  -3    5.03    3.54
 -11   4  -3    6.09    3.73
 -11   4  -3    6.39    4.00
 -11   4  -3    7.79    5.07
 -11   4  -3    4.94    4.07
 -11   4  -3    1.74    3.79
 -12  -4  -3    2.48    4.32
 -12  -4  -3    3.73    3.76
 -12  -4  -3   20.55    5.76
 -12  -4  -3   22.35    5.41
 -12   4  -3    7.14    6.06
 -12   4  -3   14.07    5.03
 -12   4  -3   11.34    5.15
 -12   4  -3    3.93    3.94
 -12   4  -3    7.70    4.07
 -12  -5   3    1.50    3.03
 -12  -5   3    3.09    2.91
 -12   5   3   -4.46    4.38
 -11  -5   3   17.46    3.73
 -11  -5   3    7.80    3.08
 -11   5   3   12.45    2.99
 -11   5   3    3.71    4.75
 -10  -5   3  218.93    8.43
 -10  -5   3  219.47    8.42
 -10  -5   3  224.83    8.62
 -10   5   3  206.34    7.64
 -10   5   3  211.96    7.71
 -10   5   3  192.29   11.72
  -9  -5   3   77.51    5.01
  -9  -5   3   70.07    8.17
  -9  -5   3   66.17    4.99
  -9  -5   3   73.80    5.16
  -9   5   3   67.57    6.20
  -9   5   3   77.05    8.18
  -9   5   3   72.13    4.70
  -9   5   3   73.21    4.69
  -9   5   3   68.09    4.69
  -8  -5   3   12.22    2.76
  -8  -5   3    9.17    4.04
  -8  -5   3    9.52    2.27
  -8  -5   3    8.35    2.41
  -8  -5   3   12.13    2.84
  -8  -5   3    9.51    2.44
  -8  -5   3   13.12    2.67
  -8   5   3   13.57    2.50
  -8   5   3    9.12    2.35
  -8   5   3   12.96    3.17
  -8   5   3    5.03    3.82
  -8   5   3    4.29    2.19
  -7  -5   3   75.58    7.17
  -7  -5   3   77.80    4.54
  -7  -5   3   81.59    4.58
  -7  -5   3   72.27    4.39
  -7  -5   3   78.01    4.43
  -7  -5   3   75.18    4.41
  -7  -5   3   73.95    4.70
  -7   5   3   86.27    4.41
  -7   5   3   87.25    5.35
  -7   5   3   74.47    4.15
  -7   5   3   93.90    7.84
  -7   5   3   71.02    4.10
  -6  -5   3  207.34    9.22
  -6  -5   3  209.39    7.06
  -6  -5   3  201.09    6.85
  -6  -5   3  196.59    6.64
  -6  -5   3  196.25    6.75
  -6  -5   3  203.51    7.09
  -6  -5   3  203.00    6.33
  -6   5   3  199.77    6.35
  -6   5   3  215.10    6.62
  -6   5   3  198.07    6.45
  -6   5   3  192.16    6.48
  -6   5   3  201.20    7.37
  -6   5   3  200.36    9.07
  -6   5   3  217.52    6.35
  -5  -5   3    6.27    2.73
  -5  -5   3    8.91    1.93
  -5  -5   3    8.02    1.99
  -5  -5   3    6.76    1.85
  -5  -5   3    7.23    1.57
  -5  -5   3   10.85    2.06
  -5  -5   3    7.50    2.02
  -5   5   3    5.41    1.73
  -5   5   3    6.69    1.90
  -5   5   3    8.68    1.86
  -5   5   3    9.48    2.08
  -5   5   3    6.93    1.78
  -5   5   3    8.97    2.30
  -5   5   3    4.04    2.60
  -4  -5   3   43.59    3.34
  -4  -5   3   42.20    3.34
  -4  -5   3   49.53    3.44
  -4  -5   3   41.92    4.43
  -4  -5   3   45.67    3.85
  -4  -5   3   45.34    3.49
  -4   5   3   37.89    4.38
  -4   5   3   44.59    3.44
  -4   5   3   53.06    4.18
   4   5  -3   40.10    2.58
  -4   5   3   45.34    3.28
  -4   5   3   50.47    3.47
  -4   5   3   52.33    3.39
  -4   5   3   50.00    3.17
  -3  -5   3  492.16   11.60
  -3  -5   3  473.13   11.99
   3  -5  -3  487.19   10.68
  -3  -5   3  495.86   12.20
  -3  -5   3  495.08   12.84
  -3  -5   3  489.12   11.79
  -3  -5   3  487.48   11.83
   3   5  -3  492.27   11.16
  -3   5   3  508.72   11.45
  -3   5   3  504.98   11.99
  -3   5   3  496.36   11.58
  -3   5   3  487.77   11.50
  -3   5   3  487.79   11.52
  -3   5   3  483.27   11.84
  -3   5   3  473.91   11.50
  -3   5   3  488.99   12.74
  -2  -5   3  594.86   13.59
   2  -5  -3  581.07   12.87
  -2  -5   3  580.87   13.25
  -2  -5   3  574.72   13.78
  -2  -5   3  594.24   13.72
  -2  -5   3  572.35   13.36
  -2   5   3  582.55   13.57
  -2   5   3  565.40   13.26
  -2   5   3  594.50   13.88
   2   5  -3  578.91   13.05
  -2   5   3  589.05   13.36
  -2   5   3  587.80   13.11
  -2   5   3  563.32   12.96
  -1  -5   3   45.44    3.76
  -1  -5   3   34.72    3.27
  -1  -5   3   36.17    3.41
   1  -5  -3   35.02    3.38
  -1  -5   3   38.13    3.47
  -1   5   3   33.23    3.11
   1   5  -3   40.73    3.76
  -1   5   3   29.94    3.10
  -1   5   3   40.40    3.90
  -1   5   3   37.99    3.47
   1   5  -3   36.78    2.07
   0  -5   3  299.97    7.55
   0  -5   3  319.58    9.27
   0  -5  -3  306.38    8.91
   0  -5  -3  314.68    9.27
   0  -5   3  307.95    8.84
   0   5  -3  311.03    9.27
   0   5   3  314.00    9.24
   0   5  -3  299.68    7.34
   0   5   3  302.98    8.96
   0   5  -3  307.74    9.06
   1  -5   3  885.57   19.13
   1  -5   3  871.24   18.41
  -1  -5  -3  863.69   18.64
  -1  -5  -3  852.44   19.05
  -1   5  -3  852.39   18.66
   1   5   3  858.25   19.06
  -1   5  -3  840.40   18.94
  -1   5  -3  833.37   17.11
   1   5   3  836.12   18.46
  -2  -5  -3  212.57    7.84
  -2  -5  -3  218.63    7.40
  -2  -5  -3  200.55    7.46
   2  -5   3  225.02    7.39
  -2  -5  -3  199.70    7.37
  -2   5  -3  211.61    7.70
   2   5   3  205.21    7.39
  -2   5  -3  216.78    7.63
  -2   5  -3  205.96    7.42
   2   5   3  206.87    7.85
  -2   5  -3  206.33    7.22
  -2   5  -3  221.75    7.79
  -3  -5  -3   19.53    3.08
  -3  -5  -3   20.99    3.13
  -3  -5  -3   21.66    3.09
   3  -5   3   20.17    2.79
  -3  -5  -3   20.96    3.39
  -3  -5  -3   18.22    2.83
  -3   5  -3   14.99    3.06
  -3   5  -3   15.44    3.01
  -3   5  -3   15.33    2.76
  -3   5  -3   12.40    2.71
  -3   5  -3   17.65    2.62
   3   5   3   16.12    2.81
  -4  -5  -3  511.20   14.07
  -4  -5  -3  510.46   13.41
  -4  -5  -3  540.85   13.79
   4  -5   3  514.88   12.65
  -4  -5  -3  494.02   13.47
  -4  -5  -3  518.60   13.63
  -4   5  -3  489.93   13.86
   4   5   3  499.67   12.95
  -4   5  -3  513.28   13.43
  -4   5  -3  521.57   14.26
  -4   5  -3  502.86   13.75
  -4   5  -3  493.32   13.51
  -4   5  -3  506.82   13.38
  -5  -5  -3  269.78    9.58
  -5  -5  -3  258.25    9.30
  -5  -5  -3  267.64    9.77
  -5  -5  -3  258.66    9.14
  -5  -5  -3  263.92    9.41
  -5  -5  -3  262.15    9.21
   5  -5   3  266.85    8.14
  -5   5  -3  266.62   10.39
  -5   5  -3  248.21    8.93
  -5   5  -3  246.72    9.31
  -5   5  -3  269.75    9.61
  -5   5  -3  269.03    9.34
   5   5   3  250.03    8.37
  -5   5  -3  253.35    9.06
  -6  -5  -3    8.56    2.73
  -6  -5  -3   10.68    3.37
  -6  -5  -3    8.97    2.93
  -6  -5  -3    3.59    2.57
  -6  -5  -3   13.70    2.90
  -6   5  -3    8.70    3.00
  -6   5  -3   10.74    3.80
  -6   5  -3    6.32    2.98
  -6   5  -3    5.60    2.55
  -6   5  -3    7.48    2.73
  -6   5  -3    9.45    2.83
  -7  -5  -3  223.91    9.91
  -7  -5  -3  209.95    9.01
  -7  -5  -3  218.83    9.77
  -7  -5  -3  225.22    9.48
  -7  -5  -3  211.05    9.42
  -7   5  -3  224.91    9.45
  -7   5  -3  236.48    9.23
  -7   5  -3  233.07    9.21
  -7   5  -3  220.97    9.36
  -7   5  -3  211.35   10.76
  -8  -5  -3   74.82    7.16
  -8  -5  -3   84.67    6.44
  -8  -5  -3   79.72    7.34
  -8  -5  -3   65.72    6.18
  -8  -5  -3   58.59    6.43
  -8   5  -3   81.24    6.94
  -8   5  -3   71.81    6.90
  -8   5  -3   65.48    6.32
  -8   5  -3   81.06    6.78
  -8   5  -3   68.22    7.82
  -9  -5  -3    5.17    3.55
  -9  -5  -3    9.89    3.64
  -9  -5  -3   10.79    3.38
  -9  -5  -3   13.40    4.42
  -9  -5  -3    9.74    3.87
  -9   5  -3    6.71    3.29
  -9   5  -3   10.94    4.82
  -9   5  -3   12.00    4.01
  -9   5  -3    7.65    3.62
  -9   5  -3   12.26    3.45
 -10  -5  -3    3.73    3.16
 -10  -5  -3    5.83    3.92
 -10  -5  -3    2.33    3.67
 -10  -5  -3    4.76    4.07
 -10  -5  -3    4.25    3.57
 -10   5  -3    5.81    4.58
 -10   5  -3    5.32    3.74
 -10   5  -3    5.11    3.71
 -10   5  -3    4.83    3.25
 -10   5  -3    2.74    3.39
 -11  -5  -3   49.63    7.22
 -11  -5  -3   34.88    5.92
 -11  -5  -3   44.09    6.84
 -11  -5  -3   36.02    6.38
 -11   5  -3   39.98    8.31
 -11   5  -3   51.82    6.81
 -11   5  -3   48.35    6.64
 -11   5  -3   44.29    6.62
 -11   5  -3   44.08    6.21
 -12  -5  -3   25.83    5.76
 -12  -5  -3   35.34    6.84
 -12  -5  -3   36.00    6.72
 -12   5  -3   40.66    6.72
 -12   5  -3   33.24    6.08
 -12   5  -3   29.95    5.62
 -12   5  -3   27.24    7.53
 -12  -6   3   -4.77    2.86
 -12  -6   3    0.87    3.40
 -12   6   3    2.29    2.84
 -12   6   3   -0.29    2.88
 -12   6   3   -0.59    4.98
 -11  -6   3   -2.92    2.71
 -11  -6   3   -1.64    2.93
 -11   6   3    0.73    2.89
 -11   6   3   -5.36    4.10
 -11   6   3   -4.28    2.31
 -10  -6   3   -2.42    2.38
 -10  -6   3   -4.81    2.22
 -10  -6   3    3.76    2.95
 -10   6   3   -2.34    3.68
 -10   6   3    1.05    2.43
 -10   6   3   -1.22    2.46
  -9  -6   3    5.09    2.57
  -9  -6   3    4.25    2.68
  -9  -6   3    5.91    2.41
  -9  -6   3    5.74    2.53
  -9  -6   3    8.86    2.87
  -9   6   3    7.03    4.43
  -9   6   3    3.58    2.51
  -9   6   3    9.03    2.74
  -9   6   3    5.99    2.60
  -8  -6   3    1.02    1.91
  -8  -6   3    7.95    2.43
  -8  -6   3    1.66    3.48
  -8  -6   3    4.33    2.26
  -8  -6   3    4.31    2.38
  -8  -6   3    3.56    2.24
  -8   6   3    1.94    2.07
  -8   6   3    5.98    3.75
  -8   6   3    1.81    2.09
  -8   6   3    4.75    2.11
  -8   6   3    6.14    2.63
  -7  -6   3  223.89    8.36
  -7  -6   3  225.25    8.12
  -7  -6   3  232.76    7.38
  -7  -6   3  226.52    8.00
  -7  -6   3  227.36    8.03
  -7  -6   3  225.12    7.93
  -7  -6   3  221.27   10.47
  -7   6   3  214.70    7.44
  -7   6   3  216.84    7.54
  -7   6   3  220.98   10.51
  -7   6   3  218.35    7.43
  -7   6   3  230.14    7.64
  -7   6   3  229.89    7.44
  -7   6   3  229.52    8.31
  -6  -6   3   -0.18    1.68
  -6  -6   3    1.36    1.85
  -6  -6   3   -0.28    1.35
  -6  -6   3   -2.11    1.70
  -6  -6   3    0.42    2.65
  -6  -6   3   -0.07    1.66
  -6  -6   3   -2.26    1.48
  -6   6   3    0.91    1.69
  -6   6   3    0.13    1.66
  -6   6   3   -0.12    1.76
  -6   6   3    2.09    2.84
  -6   6   3   -3.48    1.39
  -6   6   3    1.72    1.83
  -6   6   3    0.24    1.37
  -5  -6   3   -0.29    1.48
  -5  -6   3   -1.56    1.42
  -5  -6   3    1.76    1.90
  -5  -6   3    0.55    1.06
  -5  -6   3   -0.13    1.64
  -5  -6   3    3.35    2.70
  -5  -6   3    0.25    1.53
  -5   6   3    1.23    1.74
  -5   6   3   -1.86    2.27
  -5   6   3   -0.63    1.46
  -5   6   3    2.88    1.93
  -5   6   3   -0.72    1.22
  -5   6   3   -2.19    1.64
  -5   6   3    0.81    1.55
  -4  -6   3    1.60    1.45
   4  -6  -3    3.07    1.33
  -4  -6   3    1.05    1.67
  -4  -6   3   -0.08    1.62
  -4  -6   3    1.73    1.68
  -4  -6   3    0.94    1.46
  -4  -6   3   -0.53    1.97
  -4   6   3   -0.96    1.49
   4   6  -3   -1.31    1.30
  -4   6   3    2.27    1.58
  -4   6   3    5.82    2.03
  -4   6   3    0.31    1.62
  -4   6   3    3.70    2.41
  -4   6   3    1.99    1.55
  -4   6   3    0.59    1.81
  -3  -6   3   -0.05    1.66
  -3  -6   3    1.43    1.79
  -3  -6   3   -0.80    1.41
  -3  -6   3   -1.32    1.81
  -3  -6   3    0.34    1.65
   3  -6  -3   -1.11    1.39
  -3  -6   3    1.45    1.50
  -3   6   3    0.51    1.73
  -3   6   3    2.37    1.81
  -3   6   3    0.55    1.48
  -3   6   3    0.66    1.81
  -3   6   3    2.31    1.86
  -3   6   3    1.31    1.66
   3   6  -3    0.19    1.75
  -3   6   3    2.51    1.71
  -3   6   3   -1.96    2.13
   2  -6  -3  327.15    8.90
  -2  -6   3  312.18    9.09
  -2  -6   3  315.19    9.33
  -2  -6   3  311.95    9.34
  -2  -6   3  311.73    9.62
  -2   6   3  318.54    9.49
  -2   6   3  310.97    9.31
  -2   6   3  315.32    9.23
  -2   6   3  315.93    9.06
  -2   6   3  320.52    8.93
   2   6  -3  323.89    9.23
   2   6  -3  324.13    9.15
  -1  -6   3   48.22    3.67
  -1  -6   3   57.10    5.02
  -1  -6   3   56.44    4.68
  -1  -6   3   49.72    3.63
   1  -6  -3   50.24    4.24
  -1   6   3   45.14    3.84
  -1   6   3   47.35    4.27
   1   6  -3   45.50    2.50
  -1   6   3   43.75    4.24
   1   6  -3   45.40    4.00
  -1   6   3   42.49    3.79
   0  -6  -3   30.26    3.59
   0  -6   3   30.60    3.52
   0  -6   3   32.08    3.73
   0  -6   3   33.39    3.02
   0  -6  -3   40.72    4.28
   0   6  -3   30.90    2.86
   0   6  -3   30.75    3.48
   0   6   3   35.44    3.75
   0   6  -3   26.68    3.50
   0   6   3   27.79    3.22
   1  -6   3  132.71    6.24
  -1  -6  -3  133.61    6.09
  -1  -6  -3  122.91    6.11
   1  -6   3  120.48    5.82
   1   6   3  133.55    6.32
  -1   6  -3  136.65    6.42
   1   6   3  127.40    6.13
  -1   6  -3  129.84    5.24
  -1   6  -3  128.34    6.19
  -2  -6  -3    0.75    1.95
   2  -6   3    0.63    1.72
  -2  -6  -3    1.18    1.97
  -2  -6  -3    2.46    1.97
  -2   6  -3    0.22    1.90
  -2   6  -3    1.23    1.85
  -2   6  -3    0.21    2.15
   2   6   3    0.03    1.85
  -2   6  -3   -0.90    1.87
   2   6   3    0.45    2.16
  -2   6  -3   -0.17    1.60
  -3  -6  -3   64.01    4.58
  -3  -6  -3   68.04    4.74
  -3  -6  -3   72.05    4.87
   3  -6   3   69.99    4.51
  -3  -6  -3   63.96    4.90
  -3  -6  -3   63.08    5.26
  -3   6  -3   70.09    4.89
   3   6   3   67.85    4.73
  -3   6  -3   66.72    5.51
  -3   6  -3   67.19    5.12
  -3   6  -3   63.75    4.60
  -3   6  -3   61.63    5.20
  -4  -6  -3   21.31    3.46
  -4  -6  -3   20.33    3.34
  -4  -6  -3   27.79    4.03
  -4  -6  -3   23.53    3.36
   4  -6   3   20.23    3.10
  -4  -6  -3   20.28    3.35
  -4   6  -3   23.20    3.32
  -4   6  -3   15.17    2.92
   4   6   3   24.84    3.45
  -4   6  -3   19.88    3.60
  -4   6  -3   31.72    4.61
  -4   6  -3   24.45    3.60
  -5  -6  -3   26.31    3.92
  -5  -6  -3   25.92    3.57
  -5  -6  -3   29.54    3.91
  -5  -6  -3   19.21    3.04
   5  -6   3   34.46    3.58
  -5  -6  -3   29.25    4.34
  -5  -6  -3   28.41    3.89
  -5   6  -3   29.14    4.02
  -5   6  -3   26.63    4.06
   5   6   3   24.45    3.43
  -5   6  -3   29.27    3.99
  -5   6  -3   33.48    4.00
  -5   6  -3   33.16    5.07
  -5   6  -3   25.45    3.91
  -6  -6  -3    3.26    2.56
  -6  -6  -3    6.79    2.82
  -6  -6  -3   -2.39    2.10
  -6  -6  -3    5.74    2.72
  -6  -6  -3    2.74    2.31
  -6   6  -3    3.10    2.63
  -6   6  -3   -2.68    2.88
  -6   6  -3    3.14    2.77
  -6   6  -3    1.80    2.66
  -6   6  -3    5.12    2.37
  -7  -6  -3   55.26    5.93
  -7  -6  -3   61.30    6.06
  -7  -6  -3   54.73    5.98
  -7  -6  -3   52.66    6.00
  -7  -6  -3   66.54    6.74
  -7   6  -3   58.33    5.82
  -7   6  -3   53.65    5.52
  -7   6  -3   60.65    7.47
  -7   6  -3   49.81    5.75
  -7   6  -3   61.74    6.46
  -8  -6  -3   17.02    4.05
  -8  -6  -3    8.82    3.35
  -8  -6  -3    7.86    3.56
  -8  -6  -3   12.83    3.95
  -8  -6  -3   22.93    4.41
  -8   6  -3    5.85    3.44
  -8   6  -3    9.35    3.54
  -8   6  -3    3.62    3.03
  -8   6  -3   19.88    3.86
  -8   6  -3    5.93    3.95
  -9  -6  -3   37.35    5.54
  -9  -6  -3   26.76    4.76
  -9  -6  -3   34.71    5.83
  -9  -6  -3   33.34    5.63
  -9  -6  -3   36.97    5.75
  -9   6  -3   39.34    5.66
  -9   6  -3   34.95    5.57
  -9   6  -3   36.85    6.69
  -9   6  -3   45.62    5.94
  -9   6  -3   41.05    5.65
 -10  -6  -3    2.42    3.46
 -10  -6  -3    4.32    4.17
 -10  -6  -3   -3.44    2.71
 -10  -6  -3   10.37    4.20
 -10   6  -3    4.08    3.68
 -10   6  -3    0.57    3.44
 -10   6  -3   -1.14    4.28
 -10   6  -3    4.29    3.70
 -10   6  -3    5.36    3.46
 -11  -6  -3   10.77    4.65
 -11  -6  -3    1.44    3.88
 -11  -6  -3    4.34    4.36
 -11  -6  -3    6.87    4.12
 -11   6  -3    4.79    4.38
 -11   6  -3   -1.15    4.85
 -11   6  -3    8.52    4.06
 -11   6  -3   -1.29    3.22
 -12  -6  -3   -0.85    3.89
 -12  -6  -3   10.27    5.44
 -12  -6  -3   -3.19    4.60
 -12   6  -3    7.23    6.10
 -12   6  -3    3.66    4.38
 -12   6  -3   -3.56    3.75
 -12   6  -3    0.82    3.85
 -12  -7   3   -0.99    3.20
 -12  -7   3   -1.92    3.27
 -12   7   3   -3.32    3.01
 -12   7   3    2.88    5.39
 -12   7   3   -1.45    2.64
 -11  -7   3   91.04    7.76
 -11  -7   3   84.77    7.14
 -11  -7   3   85.60    7.33
 -11  -7   3   93.68    7.99
 -11   7   3   67.49    9.40
 -11   7   3   92.36    6.61
 -11   7   3   88.88    6.65
 -10  -7   3   57.95    5.80
 -10  -7   3   50.13    5.51
 -10  -7   3   53.48    5.80
 -10  -7   3   64.87    6.13
 -10   7   3   66.38    5.59
 -10   7   3   78.84    5.72
 -10   7   3   53.19    7.80
 -10   7   3   55.46    5.42
  -9  -7   3   36.57    4.50
  -9  -7   3   34.25    4.65
  -9  -7   3   36.08    4.61
  -9  -7   3   35.71    4.80
  -9   7   3   29.71    4.07
  -9   7   3   32.24    6.39
  -9   7   3   37.09    4.31
  -9   7   3   31.57    3.93
  -8  -7   3   44.32    4.98
  -8  -7   3   45.07    4.83
  -8  -7   3   44.57    4.90
  -8  -7   3   43.25    4.68
  -8   7   3   45.03    4.67
  -8   7   3   33.32    3.91
  -8   7   3   47.11    4.45
  -8   7   3   37.32    4.12
  -8   7   3   50.67    7.16
  -8   7   3   43.47    4.54
  -7  -7   3  174.27    7.46
  -7  -7   3  169.94    7.48
  -7  -7   3  174.41    9.75
  -7  -7   3  168.40    7.52
  -7  -7   3  165.93    7.64
  -7  -7   3  183.64    7.63
  -7   7   3  170.35    7.11
  -7   7   3  175.95    7.22
  -7   7   3  168.58    9.57
  -7   7   3  170.45    7.14
  -7   7   3  171.42    7.03
  -7   7   3  187.23    7.29
  -7   7   3  173.59    7.04
  -6  -7   3   45.75    4.33
  -6  -7   3   48.88    4.56
  -6  -7   3   39.67    5.30
  -6  -7   3   49.01    3.00
  -6  -7   3   45.98    4.65
  -6  -7   3   39.26    4.33
  -6  -7   3   45.65    4.43
  -6   7   3   45.70    4.39
  -6   7   3   53.47    4.78
  -6   7   3   43.91    4.18
  -6   7   3   56.66    4.26
  -6   7   3   44.75    4.40
  -6   7   3   48.90    4.38
  -6   7   3   48.32    6.23
  -5  -7   3    3.67    1.97
  -5  -7   3    3.68    1.97
  -5  -7   3    1.65    1.77
  -5  -7   3    5.30    3.05
  -5  -7   3    0.95    2.01
  -5  -7   3    0.83    1.99
  -5   7   3    2.02    1.71
  -5   7   3    2.38    1.96
  -5   7   3    5.99    2.37
  -5   7   3    2.10    2.55
  -5   7   3    1.15    1.53
  -5   7   3    0.97    2.02
  -5   7   3    0.55    1.51
  -4  -7   3   91.11    5.16
  -4  -7   3   97.96    5.31
  -4  -7   3   86.96    4.91
  -4  -7   3   87.13    5.08
  -4  -7   3   86.00    5.31
  -4  -7   3   92.45    6.12
   4  -7  -3   90.98    4.27
  -4   7   3   82.23    4.89
   4   7  -3   91.13    4.64
  -4   7   3   89.05    4.72
  -4   7   3   82.59    5.79
  -4   7   3   94.32    5.16
  -4   7   3   89.79    4.97
  -4   7   3   89.40    5.26
  -4   7   3   81.91    5.08
  -3  -7   3  292.51    9.90
  -3  -7   3  287.22    9.05
  -3  -7   3  295.72    9.46
   3  -7  -3  294.52    8.52
  -3  -7   3  298.53    9.47
  -3  -7   3  303.24    9.84
  -3   7   3  294.48    9.45
   3   7  -3  304.40    9.16
  -3   7   3  298.01    9.40
  -3   7   3  306.73   10.16
  -3   7   3  310.07    9.14
  -3   7   3  306.53    9.64
  -3   7   3  285.64    9.20
  -3   7   3  299.14    8.81
  -3   7   3  296.61    9.23
   2  -7  -3    2.23    1.85
  -2  -7   3    3.38    2.17
  -2  -7   3   -0.01    1.72
  -2  -7   3   -0.14    1.49
  -2  -7   3    1.97    1.96
  -2  -7   3    2.14    2.11
   2   7  -3    2.66    1.95
  -2   7   3    2.87    1.85
  -2   7   3    1.62    1.84
  -2   7   3    5.13    2.19
   2   7  -3    2.04    1.89
  -2   7   3    2.88    2.01
  -2   7   3    4.95    2.25
  -1  -7   3  101.35    4.91
   1  -7  -3  103.18    5.32
  -1  -7   3  102.53    5.55
  -1  -7   3   97.08    5.63
  -1  -7   3  101.33    5.30
  -1   7   3   91.67    5.56
  -1   7   3  102.32    5.78
   1   7  -3  101.31    5.54
  -1   7   3   99.15    5.38
   1   7  -3   98.20    3.68
   1   7  -3  107.65    5.85
   0  -7   3  378.93   11.06
   0  -7   3  379.26   11.41
   0  -7  -3  377.11   11.37
   0  -7  -3  382.17   11.05
   0   7  -3  384.98    9.27
   0   7   3  386.06   11.50
   0   7  -3  374.80   11.21
   0   7   3  352.82   10.92
   0   7  -3  390.16   11.56
   1  -7   3  255.13    9.17
  -1  -7  -3  251.96    9.19
  -1  -7  -3  243.63    8.78
   1  -7   3  255.62    8.76
  -1   7  -3  259.02    9.27
  -1   7  -3  248.65    8.99
  -1   7  -3  249.71    7.84
   1   7   3  254.25    8.98
  -2  -7  -3  105.17    5.91
   2  -7   3  107.53    5.94
   2  -7   3  100.89    5.56
  -2  -7  -3  106.17    6.17
  -2   7  -3   98.37    5.43
  -2   7  -3  117.32    6.38
  -2   7  -3  104.85    6.17
   2   7   3  106.53    6.03
   2   7   3   97.89    6.04
  -3  -7  -3  236.75    8.38
  -3  -7  -3  234.40    8.73
  -3  -7  -3  239.78    9.33
  -3  -7  -3  234.32    8.91
   3  -7   3  238.49    8.42
  -3   7  -3  219.69    8.88
  -3   7  -3  225.74    8.66
  -3   7  -3  226.02    8.63
  -3   7  -3  228.00    8.74
  -3   7  -3  231.71    9.04
   3   7   3  241.56    8.83
  -4  -7  -3  148.38    7.29
  -4  -7  -3  153.24    7.54
  -4  -7  -3  157.51    7.07
  -4  -7  -3  157.11    7.35
   4  -7   3  151.76    6.64
  -4  -7  -3  167.46    8.00
  -4   7  -3  145.84    7.46
   4   7   3  160.93    7.28
  -4   7  -3  143.54    7.07
  -4   7  -3  161.70    7.92
  -4   7  -3  159.83    7.34
  -4   7  -3  158.15    7.69
   5  -7   3  161.82    6.81
  -5  -7  -3  165.21    7.83
  -5  -7  -3  184.24    8.72
  -5  -7  -3  166.54    7.66
  -5  -7  -3  174.71    8.16
  -5  -7  -3  174.45    7.95
  -5   7  -3  167.69    8.20
  -5   7  -3  174.72    8.87
  -5   7  -3  173.04    8.30
  -5   7  -3  186.41    8.21
   5   7   3  170.95    7.38
  -5   7  -3  172.06    7.94
  -6  -7  -3    7.63    2.99
  -6  -7  -3   10.63    3.34
  -6  -7  -3    5.92    3.03
  -6  -7  -3    7.24    2.75
  -6  -7  -3    3.64    2.60
  -6   7  -3    4.17    2.70
  -6   7  -3   13.10    3.22
  -6   7  -3    7.63    3.33
  -6   7  -3    7.22    3.56
  -6   7  -3    6.91    2.83
  -7  -7  -3   53.48    6.29
  -7  -7  -3   62.14    6.34
  -7  -7  -3   56.85    6.27
  -7  -7  -3   58.45    5.94
  -7  -7  -3   64.83    6.72
  -7   7  -3   59.33    7.48
  -7   7  -3   70.26    6.93
  -7   7  -3   58.75    6.37
  -7   7  -3   71.14    6.91
  -7   7  -3   70.88    6.64
  -8  -7  -3    7.45    3.66
  -8  -7  -3    2.10    3.08
  -8  -7  -3    2.58    3.69
  -8  -7  -3    1.88    2.53
  -8  -7  -3    6.67    3.53
  -8   7  -3    5.77    3.39
  -8   7  -3    2.52    4.26
  -8   7  -3    3.27    3.28
  -8   7  -3    3.35    3.34
  -8   7  -3    5.67    2.98
  -9  -7  -3    8.00    3.81
  -9  -7  -3   13.29    4.71
  -9  -7  -3   14.26    4.04
  -9  -7  -3   12.37    4.34
  -9   7  -3   17.32    4.47
  -9   7  -3    9.22    4.10
  -9   7  -3    5.65    3.27
  -9   7  -3   14.09    5.42
  -9   7  -3   15.89    4.32
 -10  -7  -3   -0.16    3.04
 -10  -7  -3    4.27    3.36
 -10  -7  -3    1.91    4.10
 -10  -7  -3    3.69    3.68
 -10   7  -3   -4.25    4.25
 -10   7  -3    2.87    3.99
 -10   7  -3    1.55    3.65
 -10   7  -3    0.50    3.17
 -11  -7  -3   12.33    4.09
 -11  -7  -3   13.83    5.72
 -11  -7  -3   13.01    5.16
 -11   7  -3    7.73    4.34
 -11   7  -3   10.65    5.56
 -11   7  -3   12.05    4.84
 -11   7  -3   16.66    4.74
 -12  -7  -3    2.21    5.06
 -12  -7  -3   14.70    5.44
 -12   7  -3   -3.12    4.23
 -12   7  -3   -0.20    4.30
 -12   7  -3    6.51    5.56
 -12   7  -3    2.07    3.83
 -12  -8   3   47.50    6.62
 -12  -8   3   61.52    6.97
 -12   8   3   40.13    8.76
 -12   8   3   43.76    5.86
 -12   8   3   40.63    5.46
 -11  -8   3   10.88    3.78
 -11  -8   3   14.92    4.28
 -11  -8   3   16.53    4.50
 -11  -8   3   14.38    4.14
 -11   8   3    9.25    5.34
 -11   8   3    7.93    3.48
 -11   8   3    9.88    3.87
 -10  -8   3   -2.92    2.46
 -10  -8   3    1.27    2.89
 -10  -8   3    0.79    2.90
 -10  -8   3   -0.52    2.96
 -10   8   3    0.14    2.99
 -10   8   3    0.77    4.32
 -10   8   3   -2.03    2.64
 -10   8   3   -1.16    2.56
  -9  -8   3  136.94    7.56
  -9  -8   3  121.37    7.28
  -9  -8   3  126.54    7.85
  -9  -8   3  131.21    7.76
  -9   8   3  109.94   10.37
  -9   8   3  139.17    7.45
  -9   8   3  119.53    6.81
  -9   8   3  126.54    7.17
  -9   8   3  139.46    7.26
  -8  -8   3  116.44    6.89
  -8  -8   3   97.36    6.27
  -8  -8   3  103.68    6.71
  -8  -8   3   98.04    6.84
  -8   8   3   95.56    6.36
  -8   8   3   98.35    6.18
  -8   8   3  101.38    9.28
  -8   8   3  110.55    6.63
  -8   8   3   96.22    6.18
  -7  -8   3    9.65    3.07
  -7  -8   3    8.80    3.18
  -7  -8   3   11.41    3.26
  -7  -8   3    9.74    2.77
  -7   8   3   10.70    2.72
  -7   8   3   11.14    2.83
  -7   8   3    8.55    2.92
  -7   8   3   12.53    3.16
  -7   8   3    3.77    2.10
  -7   8   3   13.98    3.13
  -7   8   3    7.52    3.87
  -6  -8   3   -0.71    1.85
  -6  -8   3    1.05    2.19
  -6  -8   3   -3.38    1.74
  -6  -8   3   -1.01    2.06
  -6   8   3   -3.01    1.74
  -6   8   3   -2.39    2.68
  -6   8   3    2.67    2.24
  -6   8   3    1.33    2.07
  -6   8   3    0.56    1.86
  -6   8   3   -1.37    1.79
  -6   8   3    0.91    1.72
  -5  -8   3  147.86    7.04
  -5  -8   3  139.23    7.22
  -5  -8   3  148.15    7.03
  -5  -8   3  152.08    7.07
  -5  -8   3  154.59    8.30
  -5  -8   3  149.55    6.78
  -5   8   3  145.09    6.68
  -5   8   3  136.79    6.61
  -5   8   3  134.67    7.70
  -5   8   3  132.07    6.77
  -5   8   3  138.03    6.00
  -5   8   3  137.94    6.51
  -5   8   3  146.15    6.97
   4  -8  -3  183.05    6.51
  -4  -8   3  183.38    7.78
  -4  -8   3  177.66    7.36
  -4  -8   3  184.42    7.94
  -4  -8   3  178.67    7.61
  -4  -8   3  192.01    7.98
  -4  -8   3  191.45    8.76
  -4   8   3  193.27    7.63
  -4   8   3  188.16    7.70
   4   8  -3  188.21    7.13
  -4   8   3  184.61    7.49
  -4   8   3  182.63    8.56
  -4   8   3  190.74    7.74
  -4   8   3  182.65    7.79
  -4   8   3  178.52    6.74
  -3  -8   3   10.65    2.65
   3  -8  -3   15.79    2.77
  -3  -8   3   14.80    3.35
  -3  -8   3   10.15    2.69
  -3  -8   3    9.37    2.24
  -3  -8   3   19.32    3.63
  -3   8   3   10.02    3.09
  -3   8   3    7.72    2.33
  -3   8   3    9.35    2.72
  -3   8   3   12.04    2.78
  -3   8   3    9.99    2.75
  -3   8   3    7.64    2.34
  -3   8   3   14.65    2.90
  -3   8   3   11.14    2.78
   3   8  -3   10.49    2.76
  -2  -8   3    2.31    1.60
  -2  -8   3    2.73    2.19
  -2  -8   3    6.11    2.32
  -2  -8   3    1.30    1.48
   2  -8  -3    1.42    1.90
  -2  -8   3    2.21    2.21
  -2   8   3   -0.04    2.08
   2   8  -3    6.26    2.33
   2   8  -3    6.98    2.34
  -2   8   3    1.66    2.19
  -2   8   3    3.32    2.02
  -2   8   3    7.06    2.24
  -1  -8   3  541.48   14.46
  -1  -8   3  516.36   14.79
   1  -8  -3  526.04   14.64
   1  -8  -3  550.81   14.16
  -1   8   3  550.84   14.49
  -1   8   3  525.35   14.24
   1   8  -3  547.38   14.93
   1   8  -3  531.53   14.36
   1   8  -3  531.87   11.28
  -1   8   3  557.78   14.93
  -1   8   3  543.15   14.21
   0  -8  -3   27.70    3.71
   0  -8   3   57.30    5.51
   0  -8   3   42.79    4.47
   0  -8  -3   50.66    4.84
   0   8   3   45.69    4.77
   0   8  -3   50.82    5.59
   0   8   3   48.86    5.52
   0   8  -3   47.35    3.84
   0   8  -3   53.05    5.13
  -1  -8  -3   20.41    3.63
  -1  -8  -3   25.12    3.64
   1  -8   3   32.33    4.54
   1  -8   3   26.56    3.71
   1   8   3   24.57    3.98
  -1   8  -3   19.83    3.57
  -1   8  -3   26.65    4.21
  -1   8  -3   20.95    3.20
   1   8   3   19.96    3.45
  -2  -8  -3  342.30   11.62
   2  -8   3  321.88   10.59
   2  -8   3  344.67   11.46
  -2  -8  -3  344.65   11.26
  -2   8  -3  326.47   11.20
  -2   8  -3  338.94   10.39
   2   8   3  333.77   11.08
  -2   8  -3  339.41   11.18
  -2   8  -3  356.91   11.66
  -3  -8  -3   86.91    5.48
  -3  -8  -3   80.69    5.51
  -3  -8  -3   91.04    5.92
   3  -8   3   75.87    5.17
  -3  -8  -3   80.16    5.85
  -3  -8  -3   90.01    6.35
   3   8   3   88.69    6.36
  -3   8  -3  104.33    6.14
  -3   8  -3   86.86    6.00
  -3   8  -3   77.22    6.02
  -3   8  -3   88.84    5.92
  -3   8  -3   81.79    6.13
   3   8   3   87.79    5.86
  -4  -8  -3   19.39    3.68
  -4  -8  -3   21.76    3.72
  -4  -8  -3   12.22    2.67
  -4  -8  -3   15.68    3.23
   4  -8   3   21.44    3.26
  -4  -8  -3   16.85    3.61
  -4   8  -3   16.21    3.18
   4   8   3   18.34    3.64
  -4   8  -3   26.37    4.58
  -4   8  -3   11.68    3.11
  -4   8  -3   12.46    3.49
  -4   8  -3   16.95    3.76
  -5  -8  -3   29.28    4.24
  -5  -8  -3   33.28    4.50
  -5  -8  -3   36.16    4.87
  -5  -8  -3   35.79    4.43
  -5  -8  -3   34.61    4.70
   5  -8   3   39.16    4.26
  -5   8  -3   37.92    5.11
  -5   8  -3   33.77    5.18
  -5   8  -3   45.40    5.44
   5   8   3   37.88    4.50
  -5   8  -3   40.81    5.35
  -5   8  -3   36.88    4.82
  -6  -8  -3   49.13    5.68
  -6  -8  -3   57.32    6.53
  -6  -8  -3   51.37    5.39
  -6  -8  -3   52.09    6.23
  -6  -8  -3   50.37    5.48
  -6   8  -3   57.34    6.15
  -6   8  -3   56.79    6.81
  -6   8  -3   56.44    5.70
  -6   8  -3   59.92    6.53
  -6   8  -3   63.05    6.20
  -7  -8  -3   51.59    6.16
  -7  -8  -3   53.43    6.30
  -7  -8  -3   59.93    6.38
  -7  -8  -3   73.67    7.00
  -7   8  -3   63.84    7.97
  -7   8  -3   61.13    6.74
  -7   8  -3   62.05    6.72
  -7   8  -3   59.82    6.22
  -7   8  -3   70.72    7.28
  -8  -8  -3    3.51    2.97
  -8  -8  -3   -2.33    3.43
  -8  -8  -3    1.77    3.49
  -8  -8  -3    5.94    3.24
  -8   8  -3    3.87    3.24
  -8   8  -3    4.29    3.05
  -8   8  -3   -1.23    3.28
  -8   8  -3    5.72    3.78
  -8   8  -3   -2.87    3.62
  -9  -8  -3   34.33    5.72
  -9  -8  -3   38.00    6.75
  -9  -8  -3   34.66    5.57
  -9  -8  -3   36.04    6.27
  -9   8  -3   25.87    5.43
  -9   8  -3   40.86    6.28
  -9   8  -3   41.31    7.58
  -9   8  -3   34.92    5.40
 -10  -8  -3   31.64    6.20
 -10  -8  -3   26.16    5.78
 -10   8  -3   28.22    5.69
 -10   8  -3   21.81    6.63
 -10   8  -3   33.25    6.12
 -10   8  -3   41.69    6.46
 -11  -8  -3   15.87    6.12
 -11  -8  -3   13.99    5.57
 -11   8  -3   15.67    5.20
 -11   8  -3   20.33    5.88
 -11   8  -3   16.84    4.81
 -11   8  -3   16.10    6.72
 -12  -9   3   -1.44    3.63
 -12  -9   3   -0.26    4.12
 -12  -9   3   -0.01    3.87
 -12   9   3   -3.13    5.34
 -12   9   3    3.63    3.65
 -12   9   3    2.90    3.69
 -11  -9   3   -6.57    3.28
 -11  -9   3    3.46    3.92
 -11  -9   3   -0.53    2.96
 -11  -9   3    0.67    3.53
 -11   9   3   -3.59    3.15
 -11   9   3    1.85    3.41
 -11   9   3    0.76    5.19
 -10  -9   3    5.44    3.63
 -10  -9   3    6.57    3.61
 -10  -9   3    8.05    3.59
 -10  -9   3    2.90    3.51
 -10   9   3    5.57    4.90
 -10   9   3   10.32    3.87
 -10   9   3    9.10    3.50
 -10   9   3    1.25    2.94
 -10   9   3    4.42    3.36
  -9  -9   3   12.41    4.03
  -9  -9   3    5.72    3.23
  -9  -9   3    7.73    3.31
  -9  -9   3    9.13    3.71
  -9   9   3   12.02    3.51
  -9   9   3   11.14    5.22
  -9   9   3    4.60    3.05
  -9   9   3    6.78    3.20
  -9   9   3    7.68    3.31
  -8  -9   3   18.59    4.24
  -8  -9   3   13.45    3.58
  -8  -9   3   19.02    3.97
  -8  -9   3   15.99    3.86
  -8   9   3   28.66    6.13
  -8   9   3   28.05    4.42
  -8   9   3   23.11    4.21
  -8   9   3   23.45    4.12
  -8   9   3   19.51    3.94
  -7  -9   3    0.85    2.33
  -7  -9   3   -1.61    2.39
  -7  -9   3   -1.19    1.87
  -7  -9   3    3.68    3.11
  -7   9   3    2.91    2.55
  -7   9   3    0.81    2.61
  -7   9   3    3.10    2.86
  -7   9   3    4.41    2.80
  -7   9   3   -2.14    3.12
  -6  -9   3   10.14    2.92
  -6  -9   3   13.78    3.39
  -6  -9   3   11.03    3.28
  -6  -9   3   12.06    2.86
  -6   9   3   16.58    3.45
  -6   9   3   21.56    4.48
  -6   9   3   21.73    3.65
  -6   9   3   21.21    3.25
  -6   9   3   20.96    4.03
  -6   9   3   13.35    3.61
  -5  -9   3   81.50    5.84
  -5  -9   3   78.28    5.38
  -5  -9   3   73.40    5.62
  -5  -9   3   74.25    6.54
  -5   9   3   87.33    6.05
  -5   9   3   76.07    5.62
  -5   9   3   75.61    5.81
  -5   9   3   86.39    7.86
  -5   9   3   75.89    4.78
  -5   9   3   74.00    5.54
  -4  -9   3   21.14    3.41
   4  -9  -3   14.71    2.81
  -4  -9   3   18.83    3.27
  -4  -9   3   21.83    4.06
  -4  -9   3   17.30    3.52
  -4   9   3   14.36    3.27
  -4   9   3   16.16    3.48
  -4   9   3   22.85    3.13
  -4   9   3   22.81    3.79
  -4   9   3   19.40    4.09
   4   9  -3   17.44    3.23
  -4   9   3   20.00    3.64
  -4   9   3   23.75    3.79
  -4   9   3   14.93    3.04
  -3  -9   3   39.38    4.79
  -3  -9   3   45.61    4.86
  -3  -9   3   47.77    5.09
  -3  -9   3   34.60    4.20
   3  -9  -3   49.03    4.54
  -3   9   3   56.04    4.69
  -3   9   3   46.03    4.74
  -3   9   3   45.11    5.34
  -3   9   3   51.47    5.65
  -3   9   3   45.64    4.72
   3   9  -3   47.35    4.92
  -3   9   3   39.23    4.69
  -2  -9   3   20.26    3.36
  -2  -9   3   23.47    3.51
  -2  -9   3   21.84    3.63
  -2  -9   3   26.75    4.08
   2  -9  -3   22.29    3.46
   2   9  -3   24.42    3.85
  -2   9   3   22.53    3.44
   2   9  -3   25.00    3.93
  -2   9   3   26.34    3.82
  -2   9   3   18.16    3.26
  -2   9   3   23.54    3.87
  -1  -9   3   23.58    3.82
  -1  -9   3   24.03    3.66
   1  -9  -3   19.27    3.39
   1  -9  -3   25.06    3.64
  -1   9   3   16.11    3.30
  -1   9   3   24.63    4.27
  -1   9   3   15.91    3.57
  -1   9   3   22.63    3.72
   1   9  -3   20.92    3.71
   1   9  -3   22.97    3.84
   0  -9  -3   99.27    6.10
   0  -9   3   92.67    5.83
   0  -9  -3   95.32    6.24
   0  -9   3   98.68    6.30
   0   9  -3   81.33    6.04
   0   9  -3   89.43    4.74
   0   9   3   97.65    6.43
   0   9   3   89.52    6.34
  -1  -9  -3    8.48    2.91
   1  -9   3    6.91    2.58
   1  -9   3    9.93    2.84
  -1  -9  -3    8.38    2.76
   1   9   3    9.91    2.80
  -1   9  -3    5.99    2.47
  -1   9  -3   10.25    2.62
  -1   9  -3    8.18    3.13
   1   9   3    7.11    3.02
  -2  -9  -3   77.82    6.48
   2  -9   3   90.29    6.15
   2  -9   3   77.98    5.56
  -2  -9  -3   96.07    6.56
  -2   9  -3   86.18    6.42
   2   9   3   83.46    6.25
  -2   9  -3   68.37    5.64
  -2   9  -3   79.32    6.16
   2   9   3   88.29    6.17
  -2   9  -3   75.54    5.70
  -3  -9  -3   34.30    4.46
  -3  -9  -3   31.84    4.23
  -3  -9  -3   41.69    5.27
   3  -9   3   42.17    4.71
  -3  -9  -3   28.52    4.26
  -3   9  -3   40.75    5.57
   3   9   3   34.83    4.45
  -3   9  -3   32.87    4.69
  -3   9  -3   42.13    5.29
  -3   9  -3   20.22    3.55
  -3   9  -3   33.03    4.43
   4  -9   3    1.42    2.08
  -4  -9  -3    1.68    2.69
  -4  -9  -3    2.78    2.19
  -4  -9  -3    1.70    2.20
  -4  -9  -3   -0.09    2.58
  -4   9  -3   -2.84    2.60
  -4   9  -3    2.87    2.47
  -4   9  -3   -0.40    2.58
  -4   9  -3    0.78    2.02
  -4   9  -3    5.35    3.00
   4   9   3    2.67    2.66
  -5  -9  -3   31.60    4.43
  -5  -9  -3   37.91    5.27
  -5  -9  -3   33.15    4.82
  -5  -9  -3   28.82    4.39
  -5   9  -3   30.67    4.95
  -5   9  -3   32.70    5.47
  -5   9  -3   36.93    4.96
  -5   9  -3   30.35    4.68
   5   9   3   35.31    4.67
  -5   9  -3   33.77    5.02
  -6  -9  -3   12.49    3.86
  -6  -9  -3   12.95    4.21
  -6  -9  -3   12.87    3.55
  -6  -9  -3   13.71    3.56
  -6   9  -3   20.31    4.36
  -6   9  -3    8.15    3.42
  -6   9  -3   11.82    4.47
  -6   9  -3   12.16    4.34
  -6   9  -3   14.02    4.22
  -7  -9  -3   53.14    6.72
  -7  -9  -3   53.48    5.86
  -7  -9  -3   41.29    5.33
  -7  -9  -3   59.63    6.91
  -7   9  -3   58.72    7.05
  -7   9  -3   69.00    7.53
  -7   9  -3   48.32    7.24
  -7   9  -3   55.38    6.45
  -8  -9  -3   12.44    4.62
  -8  -9  -3    0.31    3.05
  -8  -9  -3   -0.21    3.57
  -8   9  -3    7.82    4.32
  -8   9  -3   10.16    5.37
  -8   9  -3   -0.81    3.64
  -8   9  -3    3.44    3.43
  -9  -9  -3    5.31    3.81
  -9  -9  -3    8.13    4.53
  -9  -9  -3   -2.37    3.89
  -9   9  -3    4.44    4.20
  -9   9  -3    7.64    4.41
  -9   9  -3    2.88    3.69
  -9   9  -3   12.81    5.95
 -10  -9  -3    5.99    4.68
 -10  -9  -3    1.42    4.37
 -10   9  -3    1.44    4.62
 -10   9  -3    0.00    3.32
 -10   9  -3    5.03    5.16
 -10   9  -3   -2.05    3.73
 -11  -9  -3    2.42    4.61
 -11  -9  -3   -1.85    4.95
 -11   9  -3   -0.74    4.19
 -11   9  -3    3.09    4.84
 -11   9  -3    7.01    5.90
 -11 -10   3   14.29    4.65
 -11 -10   3   12.26    4.80
 -11 -10   3   12.60    4.77
 -11  10   3    1.91    5.19
 -11  10   3   10.54    4.25
 -11  10   3   11.97    4.48
 -11  10   3    4.39    3.64
 -10 -10   3   16.78    4.74
 -10 -10   3    6.82    3.82
 -10 -10   3    4.60    3.34
 -10  10   3    7.21    3.72
 -10  10   3   11.22    3.82
 -10  10   3    7.09    5.16
 -10  10   3    7.16    3.60
 -10  10   3    4.24    3.51
  -9 -10   3   16.07    4.36
  -9 -10   3   18.58    4.78
  -9 -10   3   12.61    4.08
  -9 -10   3   16.23    3.63
  -9  10   3   10.46    5.25
  -9  10   3   11.85    3.73
  -9  10   3   19.92    4.54
  -9  10   3   16.48    4.18
  -9  10   3   12.51    3.94
  -8 -10   3   26.13    4.71
  -8 -10   3   27.80    4.92
  -8 -10   3   28.27    4.66
  -8 -10   3   24.31    4.98
  -8  10   3   28.01    4.83
  -8  10   3   29.17    4.69
  -8  10   3   29.94    6.30
  -8  10   3   29.05    4.86
  -8  10   3   24.82    4.53
  -7 -10   3    3.85    3.29
  -7 -10   3   -1.10    2.20
  -7 -10   3    5.74    3.22
  -7 -10   3    0.26    2.78
  -7  10   3    3.01    3.08
  -7  10   3    4.19    2.86
  -7  10   3    7.43    3.07
  -7  10   3    4.57    3.70
  -7  10   3    0.94    2.80
  -6 -10   3  118.23    7.53
  -6 -10   3  107.67    7.32
  -6 -10   3  104.91    6.63
  -6 -10   3  105.11    7.05
  -6  10   3   89.22    6.60
  -6  10   3  113.95    6.19
  -6  10   3   97.29    7.02
  -6  10   3  119.51    7.43
  -6  10   3  100.93    8.95
  -6  10   3  115.76    7.09
  -5 -10   3  183.77    8.81
  -5 -10   3  191.29    8.59
  -5 -10   3  191.56    8.88
  -5 -10   3  188.87    9.12
  -5  10   3  189.72    8.72
  -5  10   3  209.21    8.91
  -5  10   3  196.37    9.01
  -5  10   3  187.67    9.82
  -5  10   3  193.55    7.37
  -5  10   3  188.54    8.98
  -4 -10   3   12.73    3.29
  -4 -10   3    9.31    2.60
  -4 -10   3   10.32    3.18
  -4 -10   3    7.13    2.96
  -4  10   3    4.22    2.53
  -4  10   3   13.86    3.77
  -4  10   3   12.99    2.89
  -4  10   3   18.51    4.16
  -4  10   3   11.82    3.46
   4  10  -3   16.19    3.48
  -4  10   3   13.14    3.13
  -4  10   3   17.18    4.15
  -3 -10   3   20.31    3.85
  -3 -10   3   23.78    4.00
   3 -10  -3   23.77    3.60
  -3 -10   3   20.53    3.86
  -3 -10   3   21.12    1.93
  -3 -10   3   17.47    3.67
  -3  10   3   18.07    3.57
  -3  10   3   23.04    3.60
  -3  10   3   17.89    3.94
  -3  10   3   24.25    3.55
  -3  10   3   20.56    4.36
  -3  10   3   19.93    3.89
   3  10  -3   17.09    3.62
  -2 -10   3    6.97    2.48
   2 -10  -3    7.44    2.65
  -2 -10   3    5.14    2.67
  -2 -10   3    6.15    2.65
  -2  10   3   11.00    3.33
  -2  10   3    1.95    2.34
  -2  10   3    6.99    2.64
   2  10  -3    5.54    2.87
  -2  10   3   11.21    3.40
   1 -10  -3    3.63    2.39
  -1 -10   3    0.15    2.33
   1 -10  -3    1.36    2.26
  -1 -10   3   -3.49    1.88
  -1  10   3    0.94    2.60
   1  10  -3    3.41    2.50
   1  10  -3   -3.83    2.12
  -1  10   3   -0.83    2.38
  -1  10   3    0.15    1.97
   0 -10   3    1.88    2.48
   0 -10   3    3.86    2.57
   0 -10  -3    7.00    2.83
   0 -10  -3    4.65    2.95
   0  10  -3    2.10    2.75
   0  10  -3    5.41    2.79
   0  10  -3    8.51    2.38
   0  10   3    4.33    2.98
   0  10   3    5.75    3.04
   1 -10   3  150.39    8.06
   1 -10   3  151.90    7.78
  -1 -10  -3  138.49    7.98
  -1 -10  -3  141.71    7.77
   1  10   3  133.13    7.89
  -1  10  -3  149.41    6.78
  -1  10  -3  155.09    8.19
   1  10   3  131.26    7.82
  -1  10  -3  155.26    8.21
  -2 -10  -3  194.32    9.35
   2 -10   3  189.66    8.60
  -2 -10  -3  188.29    8.95
  -2  10  -3  181.80    8.98
   2  10   3  183.90    9.18
  -2  10  -3  175.46    7.94
   2  10   3  173.24    8.83
  -2  10  -3  184.12    8.70
  -2  10  -3  198.02    9.24
  -3 -10  -3  234.89   10.59
   3 -10   3  220.58    9.21
  -3 -10  -3  219.32    8.81
  -3 -10  -3  223.98   10.05
  -3  10  -3  225.69   10.23
  -3  10  -3  222.74   10.09
   3  10   3  222.75    9.77
  -3  10  -3  240.44    9.71
  -3  10  -3  225.99    9.84
  -4 -10  -3   24.51    3.86
   4 -10   3   33.88    4.70
  -4 -10  -3   35.75    5.18
  -4 -10  -3   39.05    5.74
  -4  10  -3   35.17    5.34
   4  10   3   40.25    5.15
  -4  10  -3   33.57    5.16
  -4  10  -3   29.36    4.48
  -4  10  -3   32.80    4.91
  -5 -10  -3    1.48    2.34
  -5 -10  -3    4.84    3.25
  -5 -10  -3    7.89    3.46
   5  10   3    3.36    3.07
  -5  10  -3    3.67    3.50
  -5  10  -3    6.89    2.99
  -5  10  -3    6.27    3.64
  -5  10  -3    5.03    3.53
  -6 -10  -3   57.11    7.01
  -6 -10  -3   61.67    6.22
  -6 -10  -3   70.92    7.47
  -6  10  -3   59.14    7.22
  -6  10  -3   61.63    7.22
  -6  10  -3   69.53    7.31
  -6  10  -3   72.71    7.14
  -7 -10  -3   41.95    6.23
  -7 -10  -3   41.70    6.46
  -7 -10  -3   49.52    5.77
  -7  10  -3   46.30    6.02
  -7  10  -3   53.17    7.32
  -7  10  -3   52.10    7.21
  -7  10  -3   43.53    6.59
  -8 -10  -3    5.99    4.50
  -8 -10  -3    7.02    3.52
  -8 -10  -3   12.87    4.87
  -8  10  -3    7.42    3.84
  -8  10  -3   12.97    4.91
  -8  10  -3    5.63    4.51
  -8  10  -3   12.08    5.37
  -9 -10  -3   27.47    6.19
  -9 -10  -3   18.14    5.50
  -9  10  -3   16.99    5.67
  -9  10  -3   27.23    6.83
  -9  10  -3   34.90    6.34
 -10 -10  -3   20.24    6.30
 -10 -10  -3   24.02    6.43
 -10  10  -3   29.64    7.68
 -10  10  -3   31.96    6.64
 -10  10  -3   24.90    6.72
 -11 -10  -3   -5.07    4.73
 -11 -10  -3   -1.96    5.11
 -11  10  -3    9.11    6.38
 -11  10  -3    1.10    4.61
 -11  10  -3   -7.48    4.54
 -11 -11   3    4.58    3.66
 -11 -11   3   11.60    5.17
 -11 -11   3   17.38    5.56
 -11  11   3    9.22    4.56
 -11  11   3   12.61    4.53
 -11  11   3   18.47    7.00
 -11  11   3   11.55    4.75
 -11  11   3   14.54    4.53
 -10 -11   3   50.90    7.17
 -10 -11   3   60.67    7.64
 -10 -11   3   54.96    6.67
 -10  11   3   59.10    6.71
 -10  11   3   40.55    7.86
 -10  11   3   60.22    7.31
 -10  11   3   63.91    7.11
 -10  11   3   54.76    6.94
  -9 -11   3   19.81    4.53
  -9 -11   3   20.86    5.01
  -9 -11   3   25.10    5.50
  -9  11   3   21.28    4.99
  -9  11   3   18.02    5.90
  -9  11   3   36.00    5.95
  -9  11   3   20.32    4.75
  -9  11   3   16.82    4.43
  -8 -11   3    2.66    2.98
  -8 -11   3    3.87    3.63
  -8 -11   3    7.14    3.73
  -8  11   3    7.17    3.32
  -8  11   3    6.75    3.69
  -8  11   3    0.88    2.97
  -8  11   3    2.06    4.18
  -8  11   3    8.66    3.84
  -7 -11   3   96.58    8.55
  -7 -11   3  102.51    8.38
  -7 -11   3   97.69    7.13
  -7  11   3  102.80    7.71
  -7  11   3   80.25    7.11
  -7  11   3  103.53    7.79
  -7  11   3  113.62    7.83
  -7  11   3   98.83    9.61
  -6 -11   3  147.68    8.94
  -6 -11   3  147.47    8.08
  -6 -11   3  138.02    8.61
  -6  11   3  143.99    9.59
  -6  11   3  145.59    8.62
  -6  11   3  151.71    8.73
  -6  11   3  143.84    8.39
  -6  11   3  163.01    8.67
  -5 -11   3    1.19    1.92
  -5 -11   3   -1.51    2.57
  -5 -11   3    0.09    2.75
  -5  11   3    0.12    2.79
  -5  11   3    3.59    3.18
  -5  11   3    2.11    2.27
  -5  11   3    3.85    2.56
  -5  11   3   -0.59    3.51
  -5  11   3    3.52    2.88
  -5  11   3    0.03    2.41
  -4 -11   3   28.95    4.70
  -4 -11   3   31.23    4.46
  -4 -11   3   34.88    5.36
  -4  11   3   33.10    4.99
  -4  11   3   31.90    4.92
  -4  11   3   28.37    4.21
  -4  11   3   28.32    3.84
  -4  11   3   26.68    4.84
  -4  11   3   29.09    4.80
  -4  11   3   29.98    5.20
   4  11  -3   35.98    4.88
  -3 -11   3   77.48    6.88
  -3 -11   3   84.52    7.51
   3 -11  -3   83.01    5.99
  -3 -11   3   74.52    5.72
  -3  11   3   89.74    8.30
   3  11  -3   76.12    6.79
  -3  11   3   83.13    7.32
  -3  11   3   87.11    7.28
  -3  11   3   77.88    5.32
  -2 -11   3   19.14    4.02
   2 -11  -3   21.80    3.85
  -2 -11   3   20.84    4.65
  -2  11   3   12.50    3.38
  -2  11   3   14.16    4.01
   2  11  -3   16.53    3.78
  -2  11   3   12.09    3.03
  -1 -11   3   -1.93    2.05
  -1 -11   3    2.76    2.62
   1 -11  -3   -0.20    2.45
  -1  11   3   -3.21    2.66
   1  11  -3    8.68    3.12
   1  11  -3    2.18    3.21
  -1  11   3    2.84    2.90
   1  11  -3    5.74    3.25
   0 -11   3   44.70    5.21
   0 -11  -3   51.14    6.09
   0 -11   3   59.67    6.69
   0 -11  -3   57.25    6.18
   0  11  -3   57.38    6.77
   0  11   3   51.95    6.09
   0  11   3   53.62    6.09
   0  11  -3   55.79    6.37
   0  11  -3   65.54    5.25
  -1 -11  -3  274.08   11.44
   1 -11   3  259.09   10.56
  -1 -11  -3  260.17   10.85
   1 -11   3  259.74   11.22
  -1  11  -3  265.05    9.38
  -1  11  -3  264.74   11.16
   1  11   3  267.07   11.06
   1  11   3  257.40   11.22
  -1  11  -3  230.89   10.67
   2 -11   3  101.59    6.96
  -2 -11  -3  102.33    7.35
  -2 -11  -3  104.40    7.68
   2  11   3   93.75    7.30
  -2  11  -3   95.66    7.31
  -2  11  -3   98.06    6.58
  -2  11  -3   94.07    7.29
  -3 -11  -3   22.82    3.97
   3 -11   3    8.95    3.22
  -3 -11  -3   13.48    4.10
  -3 -11  -3   11.84    3.84
  -3  11  -3   12.10    3.80
  -3  11  -3   17.41    4.26
  -3  11  -3    5.85    3.06
   3  11   3   10.28    3.73
  -4 -11  -3  111.95    6.93
   4 -11   3  126.47    7.35
  -4 -11  -3  121.73    8.75
  -4 -11  -3  126.66    8.38
  -4  11  -3  108.41    8.14
  -4  11  -3  130.58    8.66
   4  11   3  137.59    8.32
  -4  11  -3  130.03    8.25
  -5 -11  -3    2.67    3.52
  -5 -11  -3    2.36    3.33
  -5 -11  -3    1.89    2.37
  -5  11  -3    0.66    3.57
   5  11   3    2.86    3.28
  -5  11  -3    2.43    3.58
  -5  11  -3   -0.27    3.28
  -6 -11  -3   11.31    3.42
  -6 -11  -3    8.38    3.98
  -6 -11  -3    3.75    3.63
  -6  11  -3    7.53    3.88
  -6  11  -3    8.76    4.19
  -6  11  -3    9.10    4.46
  -7 -11  -3    8.58    4.45
  -7 -11  -3    4.30    2.87
  -7 -11  -3    7.09    4.14
  -7  11  -3    1.61    3.90
  -7  11  -3   -1.77    4.56
  -7  11  -3    8.53    4.34
  -8 -11  -3   91.14    8.98
  -8 -11  -3  104.74    9.96
  -8  11  -3  114.32   10.61
  -8  11  -3   81.09    9.80
  -8  11  -3  104.60    9.88
  -9 -11  -3   37.62    7.34
  -9 -11  -3   57.29    8.56
  -9  11  -3   38.64    7.16
  -9  11  -3   37.25    7.02
  -9  11  -3   42.09    8.27
 -10 -11  -3    2.74    5.05
 -10 -11  -3    7.49    5.55
 -10  11  -3    1.77    4.70
 -10  11  -3   -2.68    4.81
 -10  11  -3    5.89    4.91
 -11 -12   3   11.81    5.52
 -11 -12   3    8.47    5.15
 -11  12   3   15.75    6.88
 -11  12   3    4.43    4.42
 -11  12   3    9.89    4.50
 -11  12   3   10.89    5.00
 -10 -12   3    8.46    5.09
 -10 -12   3    4.54    4.74
 -10  12   3    9.02    4.26
 -10  12   3    6.66    4.40
 -10  12   3   -0.45    3.96
 -10  12   3    8.31    5.61
  -9 -12   3   10.14    4.79
  -9 -12   3    8.61    4.23
  -9  12   3    6.32    4.96
  -9  12   3    7.33    4.27
  -9  12   3   12.96    4.67
  -9  12   3   10.38    4.16
  -8 -12   3   26.42    5.75
  -8 -12   3   23.04    5.52
  -8  12   3   11.94    4.43
  -8  12   3   26.11    5.47
  -8  12   3   15.52    4.73
  -8  12   3   14.02    5.66
  -7 -12   3    2.11    3.36
  -7 -12   3    3.71    3.71
  -7  12   3    4.93    3.52
  -7  12   3   -4.82    2.76
  -7  12   3   -0.20    3.89
  -7  12   3    6.73    3.82
  -6 -12   3   18.25    4.59
  -6 -12   3   10.49    4.09
  -6  12   3    8.80    4.11
  -6  12   3    7.46    3.48
  -6  12   3    9.78    4.61
  -6  12   3   12.04    4.41
  -6  12   3   10.97    3.97
  -5 -12   3    2.27    3.34
  -5 -12   3   -1.37    3.02
  -5  12   3    1.32    3.00
  -5  12   3    1.96    3.30
  -5  12   3    1.84    3.16
  -5  12   3   -1.75    3.10
  -5  12   3   -2.74    2.90
  -4 -12   3   16.53    4.66
  -4 -12   3   18.03    4.19
   4  12  -3   20.03    4.24
  -4  12   3   15.28    4.11
  -4  12   3   24.02    3.79
  -4  12   3   18.40    4.28
  -4  12   3   16.60    4.30
  -4  12   3   16.84    4.78
  -3 -12   3    3.68    2.78
   3 -12  -3    4.52    3.05
  -3 -12   3    5.11    3.06
  -3  12   3    7.09    2.70
  -3  12   3    4.79    2.66
  -3  12   3    7.66    3.58
  -3  12   3    2.75    3.32
   3  12  -3    6.05    3.38
  -2 -12   3    5.74    3.02
  -2 -12   3    8.99    3.54
   2 -12  -3    8.12    3.21
   2  12  -3   13.28    3.91
  -2  12   3   10.35    3.46
  -2  12   3   10.69    4.08
   1 -12  -3   -0.59    2.54
  -1 -12   3   -2.25    2.47
  -1 -12   3    3.98    2.94
   1  12  -3    2.51    2.88
  -1  12   3   -0.53    3.21
  -1  12   3    0.39    2.69
   1  12  -3   -3.60    2.83
   0 -12  -3    4.62    3.26
   0 -12   3    7.30    3.43
   0 -12   3    4.39    3.13
   0  12   3    3.51    3.25
   0  12  -3    2.52    2.50
   0  12  -3    5.83    3.50
   0  12  -3    5.71    3.87
   0  12   3    2.87    3.32
  -1 -12  -3   16.18    3.95
  -1 -12  -3   16.00    4.33
   1 -12   3   16.90    4.08
  -1  12  -3   11.16    3.91
   1  12   3   13.70    4.16
  -1  12  -3   11.44    3.84
   1  12   3   30.14    5.82
  -1  12  -3   17.79    3.62
   2 -12   3    8.99    3.25
  -2 -12  -3    4.19    3.49
  -2 -12  -3    4.18    3.18
  -2  12  -3    8.17    3.21
  -2  12  -3    0.46    2.81
  -2  12  -3    0.46    3.06
   2  12   3    0.36    2.91
  -3 -12  -3    1.90    2.94
  -3 -12  -3    1.48    2.47
  -3 -12  -3   -0.73    3.07
   3 -12   3   -0.28    2.60
   3  12   3    4.47    3.34
  -3  12  -3    2.46    3.25
  -3  12  -3   -1.76    2.75
  -3  12  -3    2.44    3.33
  -4 -12  -3   15.21    4.41
   4 -12   3    7.38    3.35
  -4 -12  -3   14.82    3.53
  -4 -12  -3   16.88    4.55
   4  12   3   14.32    4.28
  -4  12  -3   10.90    4.35
  -4  12  -3    5.85    3.82
  -4  12  -3   15.57    4.26
  -5 -12  -3    4.32    4.02
  -5 -12  -3    4.44    3.59
  -5 -12  -3    1.79    2.65
  -5  12  -3    2.40    3.45
  -5  12  -3    0.35    3.41
  -5  12  -3   -6.28    2.91
  -6 -12  -3    3.61    3.70
  -6 -12  -3   -2.82    2.54
  -6 -12  -3   -6.73    2.95
  -6  12  -3    0.09    3.84
  -6  12  -3   -3.00    3.62
  -6  12  -3   -0.20    3.62
  -7 -12  -3    3.66    4.25
  -7 -12  -3    2.36    4.34
  -7  12  -3    6.78    4.22
  -7  12  -3   -1.65    4.17
  -7  12  -3   -2.69    4.29
  -8 -12  -3   14.27    5.90
  -8 -12  -3    7.89    4.94
  -8  12  -3   13.36    5.37
  -8  12  -3    7.73    5.05
  -8  12  -3   12.31    6.12
  -9 -12  -3   25.61    6.57
  -9 -12  -3   12.01    6.39
  -9  12  -3   29.56    6.76
  -9  12  -3   16.58    6.87
  -9  12  -3   28.72    6.63
 -10 -12  -3   15.47    5.99
 -10 -12  -3    8.79    5.80
 -10  12  -3   -1.61    4.67
 -10  12  -3   -1.27    4.95
 -10  12  -3    7.21    5.59
 -10 -13   3   49.82    7.96
 -10 -13   3   45.21    7.86
 -10  13   3   44.17    7.18
 -10  13   3   59.10    7.97
 -10  13   3   49.20    7.29
 -10  13   3   43.77    8.65
  -9 -13   3   12.98    5.39
  -9 -13   3   29.55    6.28
  -9  13   3   13.06    5.15
  -9  13   3   22.78    6.58
  -9  13   3   12.20    4.54
  -9  13   3   22.35    5.40
  -8 -13   3   17.43    5.36
  -8 -13   3   15.68    5.23
  -8  13   3   11.03    4.88
  -8  13   3   12.13    4.87
  -8  13   3   12.62    5.01
  -8  13   3   10.26    5.68
  -8  13   3   19.38    4.66
  -7 -13   3  115.78    9.96
  -7 -13   3  134.91   11.26
  -7  13   3  120.80    8.92
  -7  13   3  108.70    9.80
  -7  13   3  102.25   10.39
  -7  13   3  117.27    9.27
  -7  13   3  122.34   10.37
  -6 -13   3   77.60    7.92
  -6 -13   3   57.47    7.37
  -6  13   3   69.29    8.28
  -6  13   3   69.27    7.45
  -6  13   3   58.01    7.33
  -6  13   3   61.29    7.47
  -6  13   3   68.79    7.94
  -5 -13   3    1.87    3.31
  -5 -13   3    5.43    3.74
  -5  13   3    6.90    3.97
  -5  13   3    4.79    4.43
  -5  13   3    2.98    3.18
  -5  13   3    3.24    3.95
  -4 -13   3  136.64    9.14
  -4 -13   3  132.07    8.89
  -4  13   3  130.57    9.28
  -4  13   3  143.60    9.42
  -4  13   3  130.87    7.02
   3 -13  -3   25.32    4.88
  -3 -13   3   29.55    5.68
  -3 -13   3   34.46    5.63
  -3  13   3   29.45    4.23
   3  13  -3   28.27    4.92
  -3  13   3   24.52    5.01
  -3  13   3   20.85    4.78
  -2 -13   3   -0.48    2.64
   2 -13  -3    0.45    3.15
  -2 -13   3    2.49    2.97
  -2  13   3    2.16    3.60
  -2  13   3    2.86    3.62
   2  13  -3   -1.43    3.10
  -1 -13   3   12.54    4.18
  -1 -13   3    6.74    3.18
   1 -13  -3   12.01    3.82
  -1  13   3    9.70    3.96
  -1  13   3    9.07    3.88
   1  13  -3    9.14    3.78
   1  13  -3   11.89    4.70
   0 -13  -3   81.65    8.00
   0 -13   3   81.23    7.77
   0  13  -3   71.58    7.27
   0  13   3   79.56    8.27
   0  13   3   73.37    7.65
  -1 -13  -3  139.57    9.28
   1 -13   3  147.64    8.88
  -1  13  -3  146.53    7.86
   1  13   3  157.03    9.69
  -1  13  -3  141.17    9.68
  -1  13  -3  144.87    9.66
   2 -13   3   20.07    4.22
  -2 -13  -3   22.02    4.82
  -2 -13  -3   18.27    4.72
  -2  13  -3   32.81    6.31
  -2  13  -3   14.21    3.88
   2  13   3   19.65    5.03
  -2  13  -3   20.94    4.88
  -3 -13  -3   45.83    5.61
  -3 -13  -3   41.41    6.28
  -3 -13  -3   57.38    7.23
   3 -13   3   46.36    5.94
   3  13   3   42.51    6.46
  -3  13  -3   45.63    6.05
  -3  13  -3   32.49    5.68
  -3  13  -3   24.87    5.26
  -4 -13  -3   98.95    6.88
  -4 -13  -3  101.53    9.55
   4 -13   3  107.53    7.79
  -4 -13  -3   93.64    9.16
  -4  13  -3   85.23    9.11
   4  13   3   96.69    8.75
  -4  13  -3   92.50    9.14
  -4  13  -3   94.30    8.85
  -5 -13  -3   74.15    7.22
  -5 -13  -3   96.87    9.89
  -5 -13  -3   81.79    8.46
  -5  13  -3   86.82    9.13
  -5  13  -3  112.35   10.21
  -5  13  -3   96.98   10.15
  -6 -13  -3   62.80    7.78
  -6 -13  -3   68.87    8.61
  -6  13  -3   53.54    7.80
  -6  13  -3   66.90    7.87
  -6  13  -3   79.97    9.03
  -7 -13  -3   33.84    6.98
  -7 -13  -3   31.43    6.39
  -7  13  -3   21.84    5.88
  -7  13  -3   26.46    6.88
  -7  13  -3   18.35    5.63
  -8 -13  -3   10.63    5.47
  -8 -13  -3   24.76    6.79
  -8  13  -3   11.47    5.69
  -8  13  -3   19.65    6.56
  -8  13  -3   21.42    6.59
  -9 -13  -3    6.11    5.25
  -9 -13  -3   -4.48    4.83
  -9  13  -3    4.27    5.89
  -9  13  -3   -0.11    4.81
  -9  13  -3    4.76    4.76
 -10 -13  -3    2.88    5.72
 -10 -13  -3   13.75    6.56
 -10  13  -3    2.53    5.13
 -10  13  -3   -6.95    5.16
 -10  13  -3    5.32    5.28
 -10 -14   3    3.67    5.49
 -10 -14   3    2.57    5.27
 -10  14   3   -0.16    5.40
 -10  14   3    1.44    4.77
 -10  14   3   -7.32    4.07
 -10  14   3   -6.97    4.33
  -9 -14   3    4.36    5.18
  -9 -14   3    6.61    4.78
  -9  14   3   -2.06    5.25
  -9  14   3    4.43    5.03
  -9  14   3    3.12    4.54
  -9  14   3   -2.66    4.44
  -8 -14   3   57.21    8.12
  -8 -14   3   36.82    7.17
  -8  14   3   40.14    7.00
  -8  14   3   43.59    7.16
  -8  14   3   60.55    9.06
  -8  14   3   30.99    6.35
  -7 -14   3    6.99    4.65
  -7 -14   3   14.96    5.37
  -7  14   3    8.04    5.06
  -7  14   3    4.69    4.41
  -7  14   3    5.79    4.65
  -7  14   3    8.31    5.12
  -6 -14   3    3.49    3.85
  -6 -14   3    8.84    4.07
  -6  14   3   -1.66    3.89
  -6  14   3    1.81    3.68
  -6  14   3   -0.82    4.03
  -6  14   3    0.90    4.52
  -5 -14   3   76.44    8.59
  -5 -14   3   83.25    8.74
  -5  14   3   63.74    8.18
  -5  14   3   82.99    8.65
  -5  14   3   93.55    9.14
  -4 -14   3  271.57   12.84
  -4 -14   3  248.90   12.52
  -4  14   3  257.57   12.63
  -4  14   3  227.48   12.30
  -3 -14   3   17.10    4.68
  -3 -14   3   13.29    4.43
  -3  14   3   17.47    5.16
  -3  14   3    7.51    3.13
  -3  14   3    3.32    4.01
   3  14  -3    7.43    3.92
   2 -14  -3   33.91    5.39
  -2 -14   3   25.17    5.17
  -2 -14   3   19.18    4.79
  -2  14   3   20.58    4.88
   2  14  -3   31.20    5.96
  -2  14   3   28.73    5.72
   1 -14  -3   39.64    5.88
  -1 -14   3   38.58    5.89
  -1  14   3   43.06    6.23
  -1  14   3   49.58    7.04
   1  14  -3   32.23    5.80
   0 -14  -3    4.64    3.98
   0 -14   3   12.63    4.33
   0  14  -3   10.26    4.55
   0  14  -3    8.42    4.33
   0  14   3    4.11    3.96
   1 -14   3  110.80    8.55
  -1 -14  -3  117.24    9.02
   1  14   3   95.00    8.85
  -1  14  -3   79.52    8.58
  -1  14  -3  118.04    7.39
   2 -14   3   80.24    7.91
  -2 -14  -3   63.93    7.68
  -2  14  -3   64.49    7.98
  -2  14  -3   64.84    7.66
  -2  14  -3   76.74    7.29
   2  14   3   80.90    8.64
   3 -14   3   83.55    8.02
  -3 -14  -3   96.20    9.78
  -3 -14  -3  122.47   10.46
  -3 -14  -3  100.15    7.15
  -3  14  -3   91.44    9.21
  -3  14  -3   85.30    7.95
  -3  14  -3  127.44   11.33
   3  14   3   88.56    9.00
  -4 -14  -3  108.23   10.19
  -4 -14  -3  100.44    9.46
  -4 -14  -3   90.83    7.81
  -4  14  -3  126.72   11.75
   4  14   3  108.95    9.93
  -4  14  -3   78.68    8.28
  -4  14  -3  108.60    9.57
  -5 -14  -3   -1.38    3.84
  -5 -14  -3   -0.11    2.81
  -5 -14  -3   -4.53    3.29
  -5  14  -3    6.66    4.07
  -5  14  -3   -3.96    3.56
  -5  14  -3    3.18    4.33
  -6 -14  -3  168.96   11.99
  -6 -14  -3  149.12   11.46
  -6  14  -3  152.49   11.20
  -6  14  -3  140.52   11.16
  -6  14  -3  155.86   11.30
  -7 -14  -3    5.55    5.11
  -7 -14  -3   13.93    5.98
  -7  14  -3    6.41    4.96
  -7  14  -3    5.17    5.39
  -7  14  -3   13.59    5.67
  -8 -14  -3   11.01    6.15
  -8 -14  -3    0.88    4.84
  -8  14  -3   -1.93    4.58
  -8  14  -3   -2.10    4.56
  -8  14  -3   -2.85    5.07
  -9 -14  -3    7.94    5.51
  -9 -14  -3    0.03    5.56
  -9  14  -3    2.79    5.29
  -9  14  -3   -3.63    4.93
  -9  14  -3    1.77    6.36
  -9 -15   3   92.36   10.59
  -9 -15   3   81.15   10.27
  -9  15   3   87.99   10.36
  -9  15   3   90.20   10.57
  -9  15   3   96.96   10.30
  -9  15   3   60.13    9.96
  -8 -15   3    3.10    4.83
  -8 -15   3    8.02    4.89
  -8  15   3   -1.33    4.88
  -8  15   3    3.92    5.34
  -8  15   3    8.39    5.70
  -8  15   3    3.49    4.38
  -7 -15   3   -5.00    4.08
  -7 -15   3    6.08    4.78
  -7  15   3    3.41    5.15
  -7  15   3   -5.29    4.09
  -7  15   3   -2.42    3.62
  -7  15   3    4.87    4.97
  -6 -15   3    8.45    5.18
  -6 -15   3    1.18    4.11
  -6  15   3    6.77    4.86
  -6  15   3    3.69    4.46
  -6  15   3    6.71    4.68
  -5 -15   3    1.20    3.95
  -5 -15   3    7.05    4.59
  -5  15   3   -1.97    4.18
  -5  15   3   -4.19    4.03
  -4 -15   3    2.01    4.58
  -4 -15   3    1.12    3.76
  -4  15   3    7.07    4.54
  -4  15   3   -0.30    4.77
  -3 -15   3    7.01    4.57
  -3 -15   3   12.27    5.02
  -3  15   3   -1.81    3.97
  -3  15   3    7.52    5.16
   3  15  -3   -0.43    3.82
  -3  15   3   -0.68    2.76
   2 -15  -3    7.34    4.04
  -2 -15   3    3.50    3.95
  -2  15   3    7.96    4.70
  -2  15   3   -5.60    3.03
   2  15  -3    0.56    4.07
   1 -15  -3   17.05    4.86
  -1 -15   3   24.97    5.64
  -1  15   3   13.60    5.34
   1  15  -3   17.53    5.20
  -1  15   3   19.33    5.95
   0 -15  -3   -3.59    3.36
   0 -15   3    2.35    4.02
   0  15   3    4.04    4.62
   0  15  -3    5.16    4.07
   0  15  -3    2.08    4.18
   1 -15   3   45.73    6.62
  -1 -15  -3   59.40    7.72
  -1  15  -3   39.22    6.67
   1  15   3   59.67    7.91
  -1  15  -3   60.25    7.91
  -1  15  -3   57.72    6.74
  -2 -15  -3   58.13    7.62
   2 -15   3   88.19    8.77
  -2  15  -3   86.95    8.26
  -2  15  -3   74.06    8.93
   2  15   3   78.55    9.01
  -3 -15  -3   10.90    3.98
  -3 -15  -3    3.12    4.11
   3 -15   3    1.68    3.93
  -3  15  -3    9.70    4.48
  -3  15  -3    2.82    4.47
   3  15   3    9.98    4.66
  -3  15  -3    4.19    3.75
  -4 -15  -3   41.16    7.28
  -4 -15  -3   28.57    4.76
   4  15   3   42.50    6.94
  -4  15  -3   26.50    6.43
  -4  15  -3   46.37    7.03
  -4  15  -3   42.57    6.87
  -5 -15  -3    5.70    5.17
  -5 -15  -3    6.94    4.98
  -5  15  -3    1.96    4.51
  -5  15  -3    0.35    4.66
  -5  15  -3    3.30    4.40
  -6 -15  -3    3.02    4.88
  -6 -15  -3    8.64    5.55
  -6  15  -3   -3.01    4.39
  -6  15  -3    6.81    5.33
  -6  15  -3    3.91    4.40
  -7 -15  -3   17.75    6.02
  -7 -15  -3   19.03    6.74
  -7  15  -3   13.73    5.63
  -7  15  -3   23.56    6.68
  -7  15  -3   33.87    8.15
  -8 -15  -3    6.25    5.22
  -8 -15  -3    1.24    5.48
  -8  15  -3   10.15    5.06
  -8  15  -3   -0.27    5.12
  -8  15  -3   -3.75    5.38
  -9 -15  -3    1.23    6.13
  -9 -15  -3   -5.73    5.03
  -9  15  -3    3.82    6.40
  -9  15  -3    1.40    5.54
  -9  15  -3    1.78    5.11
  -9 -16   3   92.76   10.90
  -9 -16   3   81.57   10.47
  -9  16   3   92.88   10.93
  -9  16   3   82.58   11.42
  -9  16   3   91.56   10.56
  -8 -16   3    9.23    5.98
  -8 -16   3   15.55    6.56
  -8  16   3   -4.54    5.20
  -8  16   3    4.74    5.68
  -8  16   3    1.59    5.55
  -7 -16   3    2.73    5.26
  -7 -16   3    3.00    4.86
  -7  16   3   -3.92    4.73
  -7  16   3   -0.89    4.99
  -7  16   3   -7.59    4.50
  -6 -16   3   -0.83    4.80
  -6 -16   3    1.89    4.63
  -6  16   3    1.18    4.82
  -6  16   3    6.89    5.38
  -5 -16   3   88.69    9.74
  -5 -16   3   73.12    9.24
  -5  16   3   82.96    9.49
  -5  16   3   73.78    9.12
  -4 -16   3   34.07    7.58
  -4 -16   3   42.97    6.75
  -4  16   3   40.21    7.42
  -4  16   3   54.27    8.05
  -3 -16   3   -5.38    3.81
  -3  16   3    4.78    4.67
   3  16  -3    2.83    4.83
  -3  16   3   -4.48    3.86
  -2 -16   3  104.14   10.13
   2 -16  -3   92.41    9.07
  -2  16   3   90.61    9.70
   2  16  -3  112.04   10.77
  -2  16   3   97.99   10.75
   1 -16  -3  107.03    9.75
  -1 -16   3  110.28   10.44
  -1  16   3  110.47   10.63
   1  16  -3   97.96   10.57
   0 -16   3    6.85    4.50
   0 -16  -3   -1.68    3.59
   0  16  -3    0.12    3.92
   0  16  -3   -3.75    3.29
   0  16   3   -1.87    4.06
   1 -16   3   88.00    9.49
  -1 -16  -3   87.35    9.45
  -1  16  -3   78.87    9.30
   1  16   3   86.38    9.69
  -1  16  -3   67.53    8.75
   2 -16   3   52.68    7.18
  -2 -16  -3   47.85    7.82
  -2  16  -3   45.38    6.72
   2  16   3   47.48    7.51
  -2  16  -3   22.88    6.03
  -3 -16  -3   22.96    6.40
  -3 -16  -3   24.20    4.92
   3 -16   3   28.68    6.06
  -3  16  -3   28.39    5.86
   3  16   3   22.28    5.93
  -3  16  -3   31.40    6.86
  -4 -16  -3    8.12    5.32
  -4  16  -3   12.35    4.86
  -4  16  -3    2.51    5.26
  -4  16  -3    2.21    4.47
  -5 -16  -3   18.69    6.26
  -5  16  -3   11.85    5.81
  -5  16  -3   30.75    7.09
  -5  16  -3    7.62    4.95
  -6 -16  -3   16.40    6.63
  -6 -16  -3    5.75    5.38
  -6  16  -3    7.97    5.76
  -6  16  -3    8.19    6.15
  -6  16  -3   13.10    5.50
  -7 -16  -3   10.46    5.95
  -7 -16  -3    8.32    5.69
  -7  16  -3    1.11    6.10
  -7  16  -3    0.63    5.17
  -7  16  -3    2.37    4.99
  -8 -16  -3   -2.83    5.35
  -8 -16  -3    0.95    5.13
  -8  16  -3    1.73    5.57
  -8  16  -3    5.62    6.09
  -8  16  -3    2.45    5.41
  -8 -17   3    7.08    5.34
  -8 -17   3    5.92    5.86
  -8  17   3    0.32    5.74
  -8  17   3   -1.23    5.73
  -8  17   3    1.91    5.18
  -7 -17   3   27.49    7.37
  -7 -17   3   40.10    8.70
  -7  17   3   24.38    6.72
  -7  17   3   20.71    7.04
  -6 -17   3   57.57    9.24
  -6 -17   3   47.40    8.35
  -6  17   3   46.77    8.18
  -6  17   3   64.10    9.40
  -5 -17   3   -2.04    4.81
  -5 -17   3   -6.47    4.41
  -5  17   3   -2.18    4.93
  -5  17   3   -8.59    4.30
  -4 -17   3   59.75    8.75
  -4  17   3   40.51    7.60
  -4  17   3   42.16    8.08
  -3 -17   3   28.52    7.04
  -3  17   3   25.93    6.38
  -3  17   3   26.28    6.30
  -2 -17   3   15.53    5.75
  -2  17   3   31.49    6.88
   2  17  -3   19.15    5.87
   1 -17  -3   18.88    5.86
  -1 -17   3   16.96    5.62
  -1  17   3   15.20    5.57
   1  17  -3   20.55    5.83
   0 -17   3   42.08    7.44
   0 -17  -3   36.78    6.86
   0  17  -3   48.71    8.00
   0  17   3   33.91    7.19
  -1 -17  -3    5.91    4.97
   1 -17   3    7.64    5.13
   1  17   3    3.19    4.89
  -1  17  -3    7.39    4.85
  -1  17  -3    5.33    5.10
  -2 -17  -3    2.61    4.69
   2 -17   3    5.47    4.59
  -2  17  -3    3.88    4.85
  -2  17  -3    5.04    4.61
  -2  17  -3    0.51    4.71
   2  17   3    5.79    5.39
  -3 -17  -3    8.00    5.17
  -3  17  -3    3.32    4.09
  -3  17  -3   10.82    4.98
   3  17   3    4.22    4.95
  -4 -17  -3   44.85    8.17
  -4  17  -3   48.12    7.87
  -4  17  -3   45.81    8.19
  -5 -17  -3   23.61    7.04
  -5  17  -3   27.54    8.13
  -5  17  -3    9.31    5.50
  -5  17  -3   28.08    7.18
  -6 -17  -3   22.01    7.33
  -6  17  -3    5.27    4.81
  -6  17  -3   -4.88    5.47
  -6  17  -3   15.83    6.31
  -7 -17  -3    0.47    5.75
  -7 -17  -3    2.11    5.31
  -7  17  -3    1.40    7.10
  -7  17  -3    1.73    5.17
  -7  17  -3    6.70    5.24
  -7 -18   3    1.80    6.03
  -7 -18   3    2.46    5.49
  -7  18   3    2.12    5.97
  -7  18   3   -3.70    5.53
  -6 -18   3    2.53    5.81
  -6 -18   3   -3.86    5.22
  -6  18   3   -3.59    4.75
  -6  18   3   -7.92    5.01
  -5 -18   3   -4.86    4.79
  -5  18   3    0.87    4.86
  -5  18   3    4.90    5.98
  -4 -18   3   10.67    5.88
  -4  18   3   13.09    6.47
  -4  18   3   15.94    6.81
  -3 -18   3   12.62    5.96
  -3  18   3    7.01    5.83
  -2 -18   3   -0.79    4.39
   2  18  -3   -3.61    4.36
  -2  18   3    9.46    5.71
  -1 -18   3   -0.79    4.32
   1 -18  -3   -0.29    4.26
   1  18  -3    0.62    4.97
  -1  18   3   -1.69    5.09
   0 -18  -3   -7.05    4.28
   0 -18   3   -3.76    4.08
   0  18  -3    5.05    5.21
   0  18   3   -5.11    4.42
  -1 -18  -3   -1.82    5.02
   1 -18   3   -0.10    4.62
   1  18   3    4.83    5.20
  -1  18  -3   -3.78    4.55
   2 -18   3    6.64    4.83
  -2 -18  -3    8.17    5.80
  -2  18  -3    8.40    5.67
  -2  18  -3   10.83    6.06
   2  18   3    6.56    5.63
  -3 -18  -3    9.33    6.16
  -3  18  -3   12.18    5.43
  -3  18  -3    5.53    5.55
   3  18   3   -1.19    4.65
  -3  18  -3    3.73    5.31
  -4 -18  -3   16.66    6.51
  -4  18  -3   16.88    5.95
  -4  18  -3    0.50    4.56
  -5 -18  -3   -9.01    4.73
  -5  18  -3    3.13    4.75
  -5  18  -3   -0.94    5.16
  -6 -18  -3    7.39    6.88
  -6  18  -3   -1.21    5.67
  -6  18  -3   -3.47    4.87
  -6  18  -3   -8.19    5.08
  -6 -19   3    9.30    7.15
  -6  19   3   11.47    6.57
  -6  19   3   -9.52    5.87
  -5 -19   3   -6.58    5.11
  -5  19   3    4.64    5.89
  -5  19   3    3.91    6.20
  -4 -19   3    8.98    6.63
  -4  19   3    0.57    5.62
  -3 -19   3   61.52    9.20
  -3  19   3   57.04   10.11
  -2 -19   3    5.36    5.41
   2  19  -3    5.36    5.82
  -2  19   3    0.80    5.37
  -1 -19   3    0.57    4.88
   1 -19  -3    1.80    4.83
   1  19  -3    5.96    5.97
  -1  19   3    6.97    6.25
   0 -19  -3   17.99    6.11
   0 -19   3   19.39    6.57
   0  19  -3    8.25    5.73
   0  19   3   21.29    7.08
   1 -19   3   48.45    8.15
  -1 -19  -3   41.67    8.26
   1  19   3   37.03    8.06
  -1  19  -3   56.34    9.40
   2 -19   3    7.03    6.07
  -2 -19  -3    9.37    6.18
   2  19   3   -4.13    5.24
  -2  19  -3    5.50    6.06
  -2  19  -3    6.78    5.44
  -3 -19  -3    8.34    5.97
  -3  19  -3    0.59    5.73
  -3  19  -3    6.95    5.70
  -4 -19  -3   16.88    7.19
  -4  19  -3    2.14    5.94
  -4  19  -3    2.12    5.70
  -4  19  -3    1.76    4.95
  -5 -19  -3   19.62    7.37
  -5  19  -3   10.40    5.99
  -5  19  -3   15.63    6.83
  -5 -20   3   19.40    8.56
  -5  20   3    7.80    7.00
  -4 -20   3   16.60    7.00
  -4  20   3   14.29    6.98
  -3 -20   3    5.92    6.59
  -3  20   3   -0.99    6.04
  -2 -20   3   32.40    8.23
  -2  20   3   34.20    8.31
  -1 -20   3   29.95    8.08
  -1  20   3   38.65    8.50
   1  20  -3   25.90    7.38
   0 -20   3   24.32    7.52
   0 -20  -3   29.36    7.52
   0  20   3   12.75    6.45
   0  20  -3   21.67    7.59
  -1 -20  -3    3.64    5.76
   1 -20   3   -4.74    5.38
   1  20   3    4.48    5.82
  -1  20  -3   10.15    5.90
  -2 -20  -3   54.39    9.47
   2  20   3   23.23    7.56
  -2  20  -3   42.89    9.28
  -3 -20  -3   14.07    6.82
  -3  20  -3   12.66    6.00
  -3  20  -3    4.60    6.55
  -4 -20  -3    4.92    6.17
  -4  20  -3    3.03    6.07
  -4  20  -3    1.72    5.10
  -3 -21   3   -4.20    5.59
  -3  21   3    7.86    6.99
  -2 -21   3    9.32    7.00
  -2  21   3   -4.04    5.78
  -1 -21   3    8.45    6.69
   1  21  -3   -3.63    6.15
  -1  21   3    0.93    6.13
   0 -21  -3    5.24    6.53
   0 -21   3   -0.18    5.60
   0  21  -3    3.08    7.16
   0  21   3   -4.53    6.10
  -1 -21  -3   -1.53    5.92
   1 -21   3   12.97    6.97
  -1  21  -3    5.75    6.42
   1  21   3    7.78    6.13
  -2 -21  -3    7.35    6.44
  -2  21  -3    2.69    6.80
   2  21   3   -3.93    5.71
 -12   0   4   -4.07    3.61
 -11   0   4    3.20    3.82
 -11   0   4    1.39    3.62
 -10   0   4   -2.82    2.89
 -10   0   4   -1.01    2.70
  -9   0   4   30.57    5.58
  -9   0   4   15.56    4.02
  -8   0   4   17.71    3.79
  -8   0   4   15.94    4.01
  -7   0   4  159.15    7.97
  -7   0   4  151.45    7.14
  -6   0   4  815.31   18.19
  -6   0   4  794.95   19.12
  -5   0   4    1.36    1.76
  -5   0   4    0.47    2.08
  -4   0   4  507.77   11.52
  -4   0   4  496.78   12.64
  -3   0   4   10.79    2.04
  -3   0   4   11.59    1.61
  -3   0   4    9.93    1.47
  -3   0   4   10.18    1.57
  -3   0   4   10.15    2.41
  -2   0   4  263.67    6.52
  -2   0   4  263.36    6.87
  -2   0   4  275.61    7.69
  -2   0   4  257.10    6.80
   2   0  -4  264.17    6.04
  -2   0   4  272.82    6.47
  -2   0   4  273.13    6.41
  -1   0   4  536.10   11.55
  -1   0   4  529.32   11.50
   1   0  -4  553.81   11.51
  -1   0   4  524.53   11.45
  -1   0   4  542.97   11.77
  -1   0   4  549.41   11.97
   0   0   4   47.89    3.68
   0   0  -4   52.19    3.76
   0   0   4   38.82    3.08
   0   0   4   46.77    3.19
   0   0  -4   42.06    3.08
  -1   0  -4    2.24    1.84
   1   0   4    2.33    1.62
  -1   0  -4    2.82    1.74
   1   0   4    1.42    1.86
   1   0   4    2.14    1.83
  -1   0  -4    0.98    1.85
  -2   0  -4  394.99   10.28
  -2   0  -4  395.98   10.35
  -2   0  -4  371.19   10.02
  -2   0  -4  380.62   10.50
   2   0   4  384.67    9.95
  -3   0  -4   54.08    4.63
   3   0   4   55.52    3.91
  -3   0  -4   55.43    4.23
  -3   0  -4   61.31    4.82
  -3   0  -4   51.26    4.51
  -3   0  -4   55.86    3.99
  -4   0  -4   94.49    5.27
  -4   0  -4   84.28    5.45
  -4   0  -4   87.04    5.37
  -4   0  -4   76.52    5.11
  -4   0  -4   85.69    4.83
   4   0   4   92.03    4.66
  -5   0  -4  739.29   17.36
  -5   0  -4  683.74   18.05
  -5   0  -4  737.66   17.81
   5   0   4  710.89   15.89
  -5   0  -4  714.00   17.43
  -5   0  -4  715.19   17.07
  -5   0  -4  706.43   17.25
  -6   0  -4  146.01    6.91
  -6   0  -4  151.90    8.08
  -6   0  -4  129.55    6.56
  -6   0  -4  138.15    7.15
  -6   0  -4  148.13    7.23
  -6   0  -4  134.61    6.85
  -7   0  -4    6.75    2.90
  -7   0  -4    9.88    3.34
  -7   0  -4    8.69    3.00
  -7   0  -4    8.00    3.57
  -7   0  -4    7.11    2.59
  -8   0  -4   39.19    6.14
  -8   0  -4   49.37    5.68
  -8   0  -4   48.97    5.35
  -8   0  -4   39.95    5.05
  -8   0  -4   40.61    5.01
  -9   0  -4   84.00    9.08
  -9   0  -4   95.37    7.23
  -9   0  -4   95.98    6.94
  -9   0  -4   71.10    7.10
  -9   0  -4  100.96    7.59
 -10   0  -4    4.92    3.69
 -10   0  -4    2.24    3.70
 -10   0  -4    9.03    3.72
 -10   0  -4    7.81    3.59
 -10   0  -4   14.69    5.04
 -11   0  -4   71.12    7.56
 -11   0  -4   68.31    7.37
 -11   0  -4   80.61    8.58
 -11   0  -4   67.64    7.84
 -11   0  -4   74.15    9.63
 -12   0  -4   55.99    7.62
 -12   0  -4   65.67    7.70
 -12   0  -4   62.93    9.65
 -12   0  -4   59.39    7.71
 -12  -1   4   52.87    7.83
 -12   1   4   42.98    7.10
 -11  -1   4    9.02    3.98
 -11  -1   4    8.18    4.59
 -11   1   4   21.51    5.51
 -11   1   4   10.75    4.51
 -10  -1   4   84.18    8.36
 -10  -1   4   80.61    7.74
 -10   1   4   69.39    7.56
 -10   1   4   83.95    8.25
  -9  -1   4    1.77    2.63
  -9  -1   4    2.03    3.45
  -9   1   4    3.68    2.97
  -9   1   4    2.39    2.85
  -8  -1   4   18.43    4.34
  -8  -1   4   19.63    3.75
  -8   1   4   15.87    3.73
  -8   1   4   16.62    3.83
  -7  -1   4    4.20    2.14
  -7  -1   4    2.47    2.86
  -7   1   4    0.76    2.22
  -7   1   4    2.00    2.52
  -6  -1   4  105.09    5.18
  -6  -1   4   90.49    5.95
  -6   1   4   95.29    5.61
  -6   1   4   96.04    5.87
  -5  -1   4  204.56    7.98
  -5  -1   4  211.55    6.76
  -5   1   4  207.67    7.74
  -5   1   4  205.47    7.39
  -4  -1   4   10.98    2.74
  -4  -1   4   12.49    2.02
  -4   1   4   10.91    2.56
  -4   1   4   10.49    2.36
  -3  -1   4   12.71    1.74
  -3  -1   4   14.13    1.52
  -3  -1   4   14.29    1.70
  -3  -1   4   16.30    2.77
  -3  -1   4   14.32    1.45
  -3  -1   4   12.38    1.72
  -3   1   4   18.35    2.74
  -3   1   4   15.14    1.64
  -3   1   4   10.49    1.57
  -3   1   4   15.21    2.40
  -3   1   4   13.95    1.68
  -2  -1   4   55.13    2.93
  -2  -1   4   60.43    3.82
  -2  -1   4   55.62    3.24
  -2  -1   4   58.03    2.96
  -2  -1   4   52.31    2.78
  -2  -1   4   54.01    3.16
   2  -1  -4   56.57    2.67
  -2   1   4   56.58    3.02
  -2   1   4   49.88    3.65
   2   1  -4   57.40    2.65
  -2   1   4   55.30    3.13
  -2   1   4   53.27    3.12
  -2   1   4   54.21    2.80
  -2   1   4   53.65    2.81
  -1  -1   4   13.96    2.11
  -1  -1   4   12.45    2.02
   1  -1  -4   11.61    2.02
  -1  -1   4   13.27    2.28
  -1  -1   4   14.03    2.22
  -1  -1   4   11.86    2.14
  -1   1   4   12.82    2.35
  -1   1   4   14.67    2.21
   1   1  -4   12.01    2.10
  -1   1   4   14.09    2.26
  -1   1   4   15.01    2.13
  -1   1   4   15.99    2.41
   0  -1   4  153.70    5.68
   0  -1  -4  151.98    5.43
   0  -1   4  146.92    4.93
   0  -1   4  148.46    5.39
   0   1   4  136.18    5.51
   0   1  -4  143.25    5.50
   0   1  -4  149.75    4.80
   0   1   4  143.11    5.30
   0   1   4  150.76    5.23
  -1  -1  -4   -0.10    1.90
   1  -1   4   -1.53    1.54
   1  -1   4   -1.52    1.58
  -1  -1  -4   -0.02    1.62
   1  -1   4    0.06    1.37
  -1  -1  -4    0.21    1.70
  -1   1  -4    0.15    1.99
   1   1   4    0.94    1.68
  -1   1  -4    2.13    1.79
  -1   1  -4   -1.18    1.52
   1   1   4   -1.81    1.64
   2  -1   4  250.43    7.69
  -2  -1  -4  260.25    7.97
  -2  -1  -4  249.46    7.94
  -2  -1  -4  256.05    8.18
  -2   1  -4  260.40    7.90
   2   1   4  265.27    7.81
  -2   1  -4  256.44    8.16
  -2   1  -4  237.31    7.66
  -2   1  -4  249.31    8.01
  -3  -1  -4   10.34    2.45
  -3  -1  -4   10.06    2.64
  -3  -1  -4   11.02    2.37
  -3  -1  -4    7.47    2.25
   3  -1   4   12.18    2.33
  -3  -1  -4   18.13    2.76
  -3   1  -4   11.67    2.30
  -3   1  -4   14.08    2.85
  -3   1  -4   18.91    3.19
  -3   1  -4   11.87    2.39
   3   1   4   15.19    2.54
  -3   1  -4   12.68    2.44
   4  -1   4    7.49    2.09
  -4  -1  -4    3.79    1.94
  -4  -1  -4    5.88    2.11
  -4  -1  -4    4.72    2.50
  -4  -1  -4    5.67    2.02
  -4  -1  -4    5.09    2.20
  -4   1  -4    6.33    1.98
  -4   1  -4    7.89    2.10
  -4   1  -4    5.55    2.34
   4   1   4    7.73    2.22
  -4   1  -4   11.55    3.03
  -4   1  -4    8.31    2.64
  -5  -1  -4    6.80    2.88
  -5  -1  -4    4.26    2.51
   5  -1   4    4.85    1.91
  -5  -1  -4    8.97    2.55
  -5  -1  -4    7.56    2.21
  -5  -1  -4    7.77    2.54
  -5  -1  -4    5.59    2.20
  -5   1  -4    6.60    2.93
  -5   1  -4    8.89    2.71
   5   1   4    5.57    2.15
  -5   1  -4    1.71    1.95
  -5   1  -4    7.49    2.64
  -5   1  -4    5.80    2.10
  -5   1  -4    9.87    2.43
  -6  -1  -4    3.15    2.40
  -6  -1  -4    2.42    1.92
  -6  -1  -4    1.75    1.91
  -6  -1  -4   -0.67    2.26
  -6  -1  -4    3.83    2.94
  -6  -1  -4    5.24    2.21
  -6   1  -4    4.05    2.59
  -6   1  -4    4.57    2.30
  -6   1  -4    0.43    1.69
  -6   1  -4    5.54    2.65
  -6   1  -4    7.51    3.14
  -6   1  -4    1.71    2.02
  -7  -1  -4    6.35    3.05
  -7  -1  -4   10.82    3.40
  -7  -1  -4    6.27    3.47
  -7  -1  -4    7.46    2.64
  -7  -1  -4    6.81    2.93
  -7   1  -4   13.92    3.49
  -7   1  -4    8.90    3.23
  -7   1  -4    6.71    2.51
  -7   1  -4    8.36    3.15
  -7   1  -4   11.15    3.85
  -8  -1  -4    4.13    3.55
  -8  -1  -4    5.88    3.53
  -8  -1  -4   -0.70    2.54
  -8  -1  -4    1.89    2.35
  -8  -1  -4    2.04    2.94
  -8   1  -4    9.98    3.45
  -8   1  -4    1.87    2.53
  -8   1  -4    5.79    3.19
  -8   1  -4    0.86    3.48
  -8   1  -4    3.84    3.15
  -9  -1  -4    5.52    3.62
  -9  -1  -4    0.26    2.90
  -9  -1  -4    1.34    2.82
  -9  -1  -4    7.24    3.20
  -9  -1  -4    3.67    3.69
  -9   1  -4    4.68    3.09
  -9   1  -4    2.15    2.93
  -9   1  -4    3.79    3.16
  -9   1  -4    0.17    3.06
  -9   1  -4   -0.73    3.53
 -10  -1  -4  125.60    8.65
 -10  -1  -4  134.73    8.66
 -10  -1  -4  128.35    8.87
 -10  -1  -4  120.02    8.64
 -10  -1  -4  139.85   10.42
 -10   1  -4  129.84    8.67
 -10   1  -4  114.09   10.95
 -10   1  -4  138.57    9.07
 -10   1  -4  139.13    8.87
 -10   1  -4  129.82    8.35
 -11  -1  -4   16.03    4.49
 -11  -1  -4   20.32    6.32
 -11  -1  -4   29.48    5.54
 -11  -1  -4   16.45    4.90
 -11   1  -4   11.39    4.50
 -11   1  -4   12.85    4.52
 -11   1  -4   18.14    4.40
 -11   1  -4   12.44    5.66
 -11   1  -4   15.94    4.79
 -12  -1  -4   -0.34    3.42
 -12  -1  -4    0.66    4.52
 -12  -1  -4    1.13    4.34
 -12  -1  -4    2.37    4.89
 -12   1  -4    0.59    4.21
 -12   1  -4   -5.16    4.81
 -12   1  -4   -4.75    3.04
 -13   2   4    7.22    5.30
 -12   2   4    9.50    5.07
 -11  -2   4    1.09    4.18
 -11   2   4   -0.07    3.50
 -11   2   4    4.85    4.17
 -10  -2   4   14.25    3.88
 -10  -2   4    8.71    4.58
 -10   2   4    5.26    3.43
 -10   2   4   14.44    4.55
  -9  -2   4   89.94    6.53
  -9  -2   4  107.33    8.96
  -9   2   4   99.30    8.66
  -9   2   4   98.63    7.37
  -8  -2   4   51.92    5.14
  -8  -2   4   51.72    6.47
  -8   2   4   60.11    6.26
  -8   2   4   62.51    6.59
  -7  -2   4   37.74    4.11
  -7  -2   4   42.28    5.48
  -7   2   4   46.85    5.05
  -7   2   4   39.94    5.18
  -6  -2   4  132.45    7.07
  -6  -2   4  141.54    5.65
  -6   2   4  125.90    6.66
  -6   2   4  124.23    6.43
  -5  -2   4    1.58    1.42
  -5  -2   4    1.15    2.00
  -5   2   4    0.09    1.92
  -5   2   4    1.91    2.06
  -4  -2   4  684.69   13.18
  -4  -2   4  676.61   13.73
  -4  -2   4  677.33   13.07
  -4  -2   4  656.65   15.87
  -4  -2   4  688.10   13.44
  -4  -2   4  675.41   12.90
  -4  -2   4  664.32   13.71
  -4   2   4  705.41   15.49
  -4   2   4  671.65   15.35
  -3  -2   4   95.30    3.68
  -3  -2   4   88.06    3.35
  -3  -2   4   87.40    3.80
  -3  -2   4   85.02    3.72
  -3  -2   4   94.16    3.53
  -3  -2   4   85.84    4.74
  -3   2   4   88.23    4.53
  -3   2   4   84.94    3.38
  -3   2   4   87.29    3.60
  -3   2   4   90.01    3.59
  -3   2   4   86.25    3.30
  -3   2   4   88.87    3.16
  -3   2   4   85.12    4.65
  -2  -2   4   73.50    3.57
  -2  -2   4   71.02    3.67
  -2  -2   4   72.46    3.47
   2  -2  -4   73.82    3.17
  -2  -2   4   67.48    3.27
  -2  -2   4   74.03    4.20
  -2  -2   4   65.58    3.62
  -2   2   4   73.34    3.59
  -2   2   4   73.35    4.19
  -2   2   4   66.93    3.48
  -2   2   4   64.69    3.25
  -2   2   4   71.73    3.24
   2   2  -4   71.29    3.21
  -2   2   4   67.81    3.42
  -1  -2   4  788.55   16.69
  -1  -2   4  790.33   15.95
  -1  -2   4  777.24   16.17
  -1  -2   4  794.64   16.23
   1  -2  -4  795.90   16.05
  -1  -2   4  810.53   16.38
   1   2  -4  817.49   16.23
  -1   2   4  804.24   16.16
  -1   2   4  805.24   16.22
   1   2  -4  825.55   14.64
  -1   2   4  773.46   16.26
  -1   2   4  826.94   16.67
  -1   2   4  784.84   16.22
   0  -2   4   85.65    4.33
   0  -2  -4   89.07    4.37
   0  -2   4   90.67    4.58
   0  -2   4   94.82    3.89
   0   2  -4   88.57    4.59
   0   2   4   96.66    4.58
   0   2  -4   88.18    4.60
   0   2  -4   87.15    3.66
   0   2   4   92.78    4.40
   0   2   4   88.92    4.57
   1  -2   4    4.39    1.97
  -1  -2  -4    4.39    1.95
  -1  -2  -4    1.70    1.53
   1  -2   4    5.58    1.55
   1  -2   4    2.28    1.72
  -1  -2  -4    2.78    1.86
   1   2   4    7.06    2.27
  -1   2  -4    3.25    1.68
   1   2   4    1.31    1.70
  -1   2  -4    6.31    2.16
  -1   2  -4    2.63    2.05
   2  -2   4   45.36    2.58
  -2  -2  -4   46.15    4.20
   2  -2   4   49.75    3.97
  -2  -2  -4   46.65    4.15
  -2   2  -4   48.96    4.06
  -2   2  -4   53.33    4.68
   2   2   4   41.94    3.72
  -2   2  -4   49.80    4.24
  -2   2  -4   34.68    3.68
  -3  -2  -4    0.09    1.47
   3  -2   4   -0.85    1.63
  -3  -2  -4    2.09    1.94
  -3  -2  -4    1.38    2.03
  -3  -2  -4    1.07    1.98
  -3  -2  -4    1.93    1.79
  -3   2  -4    1.47    1.72
  -3   2  -4    2.54    1.95
  -3   2  -4    1.55    2.17
  -3   2  -4   -0.92    1.46
  -3   2  -4   -0.65    1.68
   3   2   4    1.98    1.80
  -4  -2  -4    8.92    2.55
   4  -2   4   12.54    2.38
  -4  -2  -4    9.26    2.47
  -4  -2  -4   14.37    2.98
  -4  -2  -4    9.09    2.58
  -4  -2  -4   14.05    2.77
  -4   2  -4    6.02    2.40
  -4   2  -4   11.19    2.87
  -4   2  -4   11.62    2.98
  -4   2  -4    8.12    2.25
   4   2   4    9.77    2.27
  -4   2  -4    9.12    2.48
[truncated: 889,763 more chars]
