# Supplementary material
Source: MDPI journal article supplement (https://www.mdpi.com/2624-8549/1/1/9)
Supplement: s1 [file s1 › 1dClBenz_final CCDC 1935234.cif]

 
data_CAN_1dClBenz
 
_audit_creation_method            'SHELXL-2017/1'
_chemical_name_systematic
;
 ?
;
_chemical_name_common             ?
_chemical_melting_point           ?
_chemical_formula_moiety          ?
_chemical_formula_sum
 'C30 H21 Cl Co N2 O4' 
_chemical_formula_weight          567.87

loop_
 _atom_type_symbol
 _atom_type_description
 _atom_type_scat_dispersion_real
 _atom_type_scat_dispersion_imag
 _atom_type_scat_source
 'C'  'C'   0.0033   0.0016
 'International Tables Vol C Tables 4.2.6.8 and 6.1.1.4'
 'H'  'H'   0.0000   0.0000
 'International Tables Vol C Tables 4.2.6.8 and 6.1.1.4'
 'N'  'N'   0.0061   0.0033
 'International Tables Vol C Tables 4.2.6.8 and 6.1.1.4'
 'O'  'O'   0.0106   0.0060
 'International Tables Vol C Tables 4.2.6.8 and 6.1.1.4'
 'Cl'  'Cl'   0.1484   0.1585
 'International Tables Vol C Tables 4.2.6.8 and 6.1.1.4'
 'Co'  'Co'   0.3494   0.9721
 'International Tables Vol C Tables 4.2.6.8 and 6.1.1.4'
 
_space_group_crystal_system       monoclinic
_space_group_IT_number            14
_space_group_name_H-M_alt         'P 21/c'
_space_group_name_Hall            '-P 2ybc'
 
_shelx_space_group_comment
;
The symmetry employed for this shelxl refinement is uniquely defined
by the following loop, which should always be used as a source of
symmetry information in preference to the above space-group names.
They are only intended as comments.
;
 
loop_
 _space_group_symop_operation_xyz
 'x, y, z'
 '-x, y+1/2, -z+1/2'
 '-x, -y, -z'
 'x, -y-1/2, z-1/2'
 
_cell_length_a                    10.2944(16)
_cell_length_b                    16.272(3)
_cell_length_c                    15.248(3)
_cell_angle_alpha                 90
_cell_angle_beta                  95.232(4)
_cell_angle_gamma                 90
_cell_volume                      2543.6(7)
_cell_formula_units_Z             4
_cell_measurement_temperature     173(2)
_cell_measurement_reflns_used     51772
_cell_measurement_theta_min       1.834
_cell_measurement_theta_max       28.263
 
_exptl_crystal_description        block 
_exptl_crystal_colour             red
_exptl_crystal_density_meas       none
_exptl_crystal_density_method     'not measured'           
_exptl_crystal_density_diffrn     1.483          
_exptl_crystal_F_000              1164
_exptl_transmission_factor_min    0.849                                             
_exptl_transmission_factor_max    0.921                                         
_exptl_crystal_size_max           0.20
_exptl_crystal_size_mid           0.13
_exptl_crystal_size_min           0.10
_exptl_absorpt_coefficient_mu     0.820
_shelx_estimated_absorpt_T_min    ? 
_shelx_estimated_absorpt_T_max    ? 
_exptl_absorpt_correction_type    multi-scan
_exptl_absorpt_correction_T_min   ? 
_exptl_absorpt_correction_T_max   ? 
_exptl_absorpt_process_details    'SADABS; Sheldrick, 1996'
 
_exptl_special_details
;
 ?
;
 
_diffrn_ambient_temperature       173(2)
_diffrn_radiation_wavelength      0.71073
_diffrn_radiation_type            MoK\a
_diffrn_source                    'fine-focus sealed tube'
_diffrn_measurement_device_type   'Bruker Kappa Duo Apex II diffractometer'
_diffrn_measurement_method        '1.2\% \f scans and \w scans' 
_diffrn_detector_area_resol_mean  ? 
_diffrn_reflns_number             51772
_diffrn_reflns_av_unetI/netI      0.0536
_diffrn_reflns_av_R_equivalents   0.0901
_diffrn_reflns_limit_h_min        -13
_diffrn_reflns_limit_h_max        12
_diffrn_reflns_limit_k_min        -21
_diffrn_reflns_limit_k_max        21
_diffrn_reflns_limit_l_min        -20
_diffrn_reflns_limit_l_max        20
_diffrn_reflns_theta_min          1.834
_diffrn_reflns_theta_max          28.263
_diffrn_reflns_theta_full         25.242
_diffrn_measured_fraction_theta_max   0.999
_diffrn_measured_fraction_theta_full  1.000
_diffrn_reflns_Laue_measured_fraction_max    0.999
_diffrn_reflns_Laue_measured_fraction_full   1.000
_diffrn_reflns_point_group_measured_fraction_max   0.999
_diffrn_reflns_point_group_measured_fraction_full  1.000
_reflns_number_total              6296
_reflns_number_gt                 4493
_reflns_threshold_expression      'I > 2\s(I)'
_reflns_Friedel_coverage          0.000
_reflns_Friedel_fraction_max      .
_reflns_Friedel_fraction_full     .
 
_reflns_special_details
;
 Reflections were merged by SHELXL according to the crystal
 class for the calculation of statistics and refinement.
 
 _reflns_Friedel_fraction is defined as the number of unique
 Friedel pairs measured divided by the number that would be
 possible theoretically, ignoring centric projections and
 systematic absences.
;
 
_computing_data_collection        'APEX2 (Bruker, 2005)'
_computing_cell_refinement        'SAINT-Plus (Bruker, 2004)'
_computing_data_reduction         'SAINT-Plus and XPREP (Bruker 2004)'
_computing_structure_solution     'SHELXT 2014/5 (Sheldrick, 2014)'
_computing_structure_refinement   'SHELXL-2017/1 (Sheldrick, 2017)'
_computing_molecular_graphics     'X-seed (Barbour, 1999)'
_computing_publication_material   'SHELXL-97 (Sheldrick, 1997)'
 
_refine_special_details
;
 ?
;
_refine_ls_structure_factor_coef  Fsqd
_refine_ls_matrix_type            full
_refine_ls_weighting_scheme       calc
_refine_ls_weighting_details
'w=1/[\s^2^(Fo^2^)+(0.0727P)^2^+4.2196P] where P=(Fo^2^+2Fc^2^)/3'
_atom_sites_solution_primary      ?
_atom_sites_solution_secondary    ?
_atom_sites_solution_hydrogens    geom
_refine_ls_hydrogen_treatment     constr
_refine_ls_extinction_method      none
_refine_ls_extinction_coef        .
_refine_ls_number_reflns          6296
_refine_ls_number_parameters      343
_refine_ls_number_restraints      0
_refine_ls_R_factor_all           0.0857
_refine_ls_R_factor_gt            0.0550
_refine_ls_wR_factor_ref          0.1571
_refine_ls_wR_factor_gt           0.1386
_refine_ls_goodness_of_fit_ref    1.038
_refine_ls_restrained_S_all       1.038
_refine_ls_shift/su_max           0.000
_refine_ls_shift/su_mean          0.000
 
loop_
 _atom_site_label
 _atom_site_type_symbol
 _atom_site_fract_x
 _atom_site_fract_y
 _atom_site_fract_z
 _atom_site_U_iso_or_equiv
 _atom_site_adp_type
 _atom_site_occupancy
 _atom_site_site_symmetry_order  
 _atom_site_calc_flag
 _atom_site_refinement_flags_posn
 _atom_site_refinement_flags_adp
 _atom_site_refinement_flags_occupancy
 _atom_site_disorder_assembly
 _atom_site_disorder_group
Co1 Co 0.13821(4) 0.08346(2) 0.46798(3) 0.01444(12) Uani 1 1 d . . . . .
O1A O -0.0223(2) 0.46035(13) 0.89558(14) 0.0197(5) Uani 1 1 d . . . . .
N1A N 0.0157(2) 0.15855(16) 0.54302(16) 0.0182(5) Uani 1 1 d . . . . .
C1A C -0.1430(3) 0.46928(18) 0.88199(18) 0.0158(6) Uani 1 1 d . . . . .
O2A O -0.2096(2) 0.51941(13) 0.92270(14) 0.0196(5) Uani 1 1 d . . . . .
C2A C -0.2156(3) 0.41798(18) 0.81155(19) 0.0172(6) Uani 1 1 d . . . . .
C3A C -0.1477(3) 0.36305(19) 0.76198(19) 0.0178(6) Uani 1 1 d . . . . .
H3A H -0.0578 0.3578 0.7735 0.021 Uiso 1 1 calc R U . . .
C4A C -0.2136(3) 0.31595(19) 0.6953(2) 0.0194(6) Uani 1 1 d . . . . .
C5A C -0.3489(3) 0.3228(2) 0.6801(2) 0.0256(7) Uani 1 1 d . . . . .
H5A H -0.3934 0.2918 0.6357 0.031 Uiso 1 1 calc R U . . .
C6A C -0.4176(3) 0.3754(2) 0.7307(2) 0.0285(8) Uani 1 1 d . . . . .
H6A H -0.5080 0.3785 0.7212 0.034 Uiso 1 1 calc R U . . .
C7A C -0.3511(3) 0.4234(2) 0.7956(2) 0.0225(7) Uani 1 1 d . . . . .
H7A H -0.3972 0.4594 0.8286 0.027 Uiso 1 1 calc R U . . .
C8A C -0.1380(3) 0.2598(2) 0.6422(2) 0.0197(6) Uani 1 1 d . . . . .
C9A C -0.0329(3) 0.2151(2) 0.6815(2) 0.0249(7) Uani 1 1 d . . . . .
H9A H -0.0116 0.2186 0.7420 0.030 Uiso 1 1 calc R U . . .
C10A C 0.0397(3) 0.1657(2) 0.6308(2) 0.0235(7) Uani 1 1 d . . . . .
H10A H 0.1086 0.1359 0.6588 0.028 Uiso 1 1 calc R U . . .
C11A C -0.0858(3) 0.2013(2) 0.5051(2) 0.0235(7) Uani 1 1 d . . . . .
H11A H -0.1041 0.1974 0.4444 0.028 Uiso 1 1 calc R U . . .
C12A C -0.1640(3) 0.2507(2) 0.5509(2) 0.0255(7) Uani 1 1 d . . . . .
H12A H -0.2342 0.2780 0.5214 0.031 Uiso 1 1 calc R U . . .
O1B O 0.8395(2) -0.32123(14) 0.12468(15) 0.0236(5) Uani 1 1 d . . . . .
C1B C 0.7272(3) -0.3031(2) 0.0887(2) 0.0216(6) Uani 1 1 d . . . . .
O2B O 0.6854(2) -0.33339(15) 0.01571(15) 0.0258(5) Uani 1 1 d . . . . .
N2B N 0.2516(2) 0.00291(16) 0.39242(17) 0.0199(5) Uani 1 1 d . . . . .
C2B C 0.6431(3) -0.2465(2) 0.1374(2) 0.0240(7) Uani 1 1 d . . . . .
C3B C 0.6894(3) -0.2184(2) 0.2202(2) 0.0337(9) Uani 1 1 d . . . . .
H3B H 0.7728 -0.2331 0.2435 0.040 Uiso 1 1 calc R U . . .
C4B C 0.6132(3) -0.1689(3) 0.2689(3) 0.0353(9) Uani 1 1 d . . . . .
H4B H 0.6464 -0.1502 0.3241 0.042 Uiso 1 1 calc R U . . .
C5B C 0.4875(3) -0.1468(2) 0.2359(2) 0.0225(7) Uani 1 1 d . . . . .
C6B C 0.4410(4) -0.1762(3) 0.1529(2) 0.0365(9) Uani 1 1 d . . . . .
H6B H 0.3571 -0.1624 0.1299 0.044 Uiso 1 1 calc R U . . .
C7B C 0.5177(4) -0.2256(3) 0.1042(2) 0.0338(9) Uani 1 1 d . . . . .
H7B H 0.4847 -0.2447 0.0491 0.041 Uiso 1 1 calc R U . . .
C8B C 0.4051(3) -0.0960(2) 0.2897(2) 0.0205(6) Uani 1 1 d . . . . .
C9B C 0.4298(3) -0.0913(2) 0.3818(2) 0.0231(7) Uani 1 1 d . . . . .
H9B H 0.4977 -0.1214 0.4107 0.028 Uiso 1 1 calc R U . . .
C10B C 0.3527(3) -0.0419(2) 0.4291(2) 0.0216(7) Uani 1 1 d . . . . .
H10B H 0.3715 -0.0392 0.4899 0.026 Uiso 1 1 calc R U . . .
C11B C 0.2281(3) -0.0020(2) 0.3046(2) 0.0294(8) Uani 1 1 d . . . . .
H11B H 0.1583 0.0277 0.2776 0.035 Uiso 1 1 calc R U . . .
C12B C 0.3016(3) -0.0486(2) 0.2523(2) 0.0296(8) Uani 1 1 d . . . . .
H12B H 0.2820 -0.0485 0.1916 0.035 Uiso 1 1 calc R U . . .
Cl1C Cl 0.0213(2) -0.09424(13) 0.11664(13) 0.1070(7) Uani 1 1 d . . . . .
C1C C -0.1227(6) -0.0782(3) 0.0521(4) 0.0645(15) Uani 1 1 d . . . . .
C2C C -0.1610(7) -0.1263(4) -0.0168(4) 0.0708(16) Uani 1 1 d . . . . .
H2C H -0.1046 -0.1690 -0.0275 0.085 Uiso 1 1 calc R U . . .
C3C C -0.2723(6) -0.1212(5) -0.0740(5) 0.096(3) Uani 1 1 d . . . . .
H3C H -0.2928 -0.1561 -0.1216 0.115 Uiso 1 1 calc R U . . .
C4C C -0.3529(7) -0.0531(5) -0.0489(5) 0.091(2) Uani 1 1 d . . . . .
H4C H -0.4332 -0.0443 -0.0807 0.109 Uiso 1 1 calc R U . . .
C5C C -0.3152(8) -0.0019(6) 0.0194(5) 0.115(3) Uani 1 1 d . . . . .
H5C H -0.3666 0.0437 0.0289 0.138 Uiso 1 1 calc R U . . .
C6C C -0.2030(8) -0.0153(5) 0.0752(5) 0.102(3) Uani 1 1 d . . . . .
H6C H -0.1830 0.0164 0.1253 0.123 Uiso 1 1 calc R U . . .
 
loop_
 _atom_site_aniso_label
 _atom_site_aniso_U_11
 _atom_site_aniso_U_22
 _atom_site_aniso_U_33
 _atom_site_aniso_U_23
 _atom_site_aniso_U_13
 _atom_site_aniso_U_12
Co1 0.0145(2) 0.0143(2) 0.0151(2) 0.00090(15) 0.00434(14) -0.00038(15)
O1A 0.0176(11) 0.0202(12) 0.0214(11) 0.0002(9) 0.0021(8) 0.0006(9)
N1A 0.0187(13) 0.0171(13) 0.0190(12) -0.0015(10) 0.0023(10) -0.0004(10)
C1A 0.0181(14) 0.0158(15) 0.0145(13) 0.0028(11) 0.0060(11) -0.0005(11)
O2A 0.0206(11) 0.0192(11) 0.0199(10) -0.0073(9) 0.0070(8) -0.0017(9)
C2A 0.0188(14) 0.0158(14) 0.0171(13) -0.0009(12) 0.0024(11) 0.0004(11)
C3A 0.0152(14) 0.0183(15) 0.0200(14) -0.0017(12) 0.0022(11) 0.0037(11)
C4A 0.0199(15) 0.0194(16) 0.0187(14) -0.0032(12) 0.0018(11) 0.0035(12)
C5A 0.0232(16) 0.0274(18) 0.0258(16) -0.0096(14) -0.0008(13) 0.0002(13)
C6A 0.0146(15) 0.036(2) 0.0349(19) -0.0108(16) 0.0000(13) 0.0043(14)
C7A 0.0193(15) 0.0250(17) 0.0236(15) -0.0055(13) 0.0037(12) 0.0049(13)
C8A 0.0194(15) 0.0216(16) 0.0185(14) -0.0047(12) 0.0036(12) -0.0015(12)
C9A 0.0270(17) 0.0285(18) 0.0190(15) -0.0055(13) 0.0006(13) 0.0071(14)
C10A 0.0226(16) 0.0238(17) 0.0239(16) -0.0033(13) 0.0005(13) 0.0060(13)
C11A 0.0282(17) 0.0248(18) 0.0170(14) -0.0049(13) -0.0006(12) 0.0063(13)
C12A 0.0247(17) 0.0282(18) 0.0225(16) -0.0052(14) -0.0046(13) 0.0085(14)
O1B 0.0180(11) 0.0249(12) 0.0283(12) -0.0076(10) 0.0039(9) 0.0037(9)
C1B 0.0205(16) 0.0213(16) 0.0235(16) -0.0034(13) 0.0048(12) 0.0017(12)
O2B 0.0257(12) 0.0287(13) 0.0230(12) -0.0089(10) 0.0023(9) 0.0058(10)
N2B 0.0186(13) 0.0223(14) 0.0191(13) -0.0029(11) 0.0040(10) 0.0033(10)
C2B 0.0221(16) 0.0258(17) 0.0246(16) -0.0082(13) 0.0043(13) 0.0046(13)
C3B 0.0177(16) 0.046(2) 0.036(2) -0.0205(17) -0.0012(14) 0.0088(15)
C4B 0.0220(18) 0.049(2) 0.035(2) -0.0232(18) -0.0008(14) 0.0069(16)
C5B 0.0192(15) 0.0233(17) 0.0258(16) -0.0047(13) 0.0056(12) 0.0051(12)
C6B 0.0280(19) 0.053(3) 0.0275(18) -0.0115(17) -0.0043(15) 0.0197(17)
C7B 0.0295(19) 0.047(2) 0.0240(17) -0.0124(16) -0.0030(14) 0.0171(17)
C8B 0.0156(14) 0.0225(17) 0.0239(15) -0.0061(12) 0.0048(12) 0.0030(12)
C9B 0.0184(15) 0.0262(17) 0.0248(16) 0.0000(13) 0.0016(12) 0.0072(13)
C10B 0.0219(16) 0.0263(17) 0.0171(14) -0.0024(13) 0.0045(12) 0.0058(13)
C11B 0.0258(17) 0.040(2) 0.0224(16) -0.0036(15) 0.0003(13) 0.0174(15)
C12B 0.0287(18) 0.040(2) 0.0196(16) -0.0066(15) -0.0009(13) 0.0139(16)
Cl1C 0.1114(15) 0.1099(15) 0.0897(13) 0.0154(11) -0.0457(11) -0.0178(12)
C1C 0.081(4) 0.061(4) 0.049(3) 0.011(3) -0.012(3) -0.014(3)
C2C 0.099(5) 0.056(3) 0.056(3) -0.012(3) 0.000(3) 0.003(3)
C3C 0.059(4) 0.090(5) 0.131(6) 0.055(5) -0.039(4) -0.002(3)
C4C 0.081(5) 0.110(6) 0.077(4) -0.029(4) -0.015(4) 0.021(4)
C5C 0.103(6) 0.140(7) 0.099(6) -0.055(5) -0.005(5) 0.038(5)
C6C 0.119(6) 0.090(5) 0.093(5) -0.052(4) -0.016(5) 0.027(5)
 
_geom_special_details
;
 All esds (except the esd in the dihedral angle between two l.s. planes)
 are estimated using the full covariance matrix.  The cell esds are taken
 into account individually in the estimation of esds in distances, angles
 and torsion angles; correlations between esds in cell parameters are only
 used when they are defined by crystal symmetry.  An approximate (isotropic)
 treatment of cell esds is used for estimating esds involving l.s. planes.
;
 
loop_
 _geom_bond_atom_site_label_1
 _geom_bond_atom_site_label_2
 _geom_bond_distance
 _geom_bond_site_symmetry_2
 _geom_bond_publ_flag
Co1 O1A 2.031(2) 4_565 ?
Co1 O2A 2.045(2) 2_546 ?
Co1 O1B 2.124(2) 2_655 ?
Co1 N2B 2.157(3) . ?
Co1 N1A 2.158(3) . ?
Co1 O2B 2.260(2) 2_655 ?
Co1 C1B 2.508(3) 2_655 ?
O1A C1A 1.249(4) . ?
O1A Co1 2.031(2) 4_566 ?
N1A C11A 1.342(4) . ?
N1A C10A 1.344(4) . ?
C1A O2A 1.264(3) . ?
C1A C2A 1.504(4) . ?
O2A Co1 2.045(2) 2_556 ?
C2A C7A 1.398(4) . ?
C2A C3A 1.398(4) . ?
C3A C4A 1.399(4) . ?
C3A H3A 0.9300 . ?
C4A C5A 1.395(4) . ?
C4A C8A 1.487(4) . ?
C5A C6A 1.389(5) . ?
C5A H5A 0.9300 . ?
C6A C7A 1.391(5) . ?
C6A H6A 0.9300 . ?
C7A H7A 0.9300 . ?
C8A C9A 1.393(4) . ?
C8A C12A 1.400(4) . ?
C9A C10A 1.382(4) . ?
C9A H9A 0.9300 . ?
C10A H10A 0.9300 . ?
C11A C12A 1.373(4) . ?
C11A H11A 0.9300 . ?
C12A H12A 0.9300 . ?
O1B C1B 1.268(4) . ?
O1B Co1 2.124(2) 2_645 ?
C1B O2B 1.256(4) . ?
C1B C2B 1.505(4) . ?
C1B Co1 2.508(3) 2_645 ?
O2B Co1 2.260(2) 2_645 ?
N2B C11B 1.341(4) . ?
N2B C10B 1.349(4) . ?
C2B C7B 1.385(5) . ?
C2B C3B 1.387(5) . ?
C3B C4B 1.387(5) . ?
C3B H3B 0.9300 . ?
C4B C5B 1.392(5) . ?
C4B H4B 0.9300 . ?
C5B C6B 1.396(5) . ?
C5B C8B 1.485(4) . ?
C6B C7B 1.389(5) . ?
C6B H6B 0.9300 . ?
C7B H7B 0.9300 . ?
C8B C12B 1.394(5) . ?
C8B C9B 1.407(4) . ?
C9B C10B 1.379(4) . ?
C9B H9B 0.9300 . ?
C10B H10B 0.9300 . ?
C11B C12B 1.376(5) . ?
C11B H11B 0.9300 . ?
C12B H12B 0.9300 . ?
Cl1C C1C 1.723(6) . ?
C1C C2C 1.339(7) . ?
C1C C6C 1.382(9) . ?
C2C C3C 1.378(8) . ?
C2C H2C 0.9300 . ?
C3C C4C 1.457(10) . ?
C3C H3C 0.9300 . ?
C4C C5C 1.362(9) . ?
C4C H4C 0.9300 . ?
C5C C6C 1.388(10) . ?
C5C H5C 0.9300 . ?
C6C H6C 0.9300 . ?
 
loop_
 _geom_angle_atom_site_label_1
 _geom_angle_atom_site_label_2
 _geom_angle_atom_site_label_3
 _geom_angle
 _geom_angle_site_symmetry_1
 _geom_angle_site_symmetry_3
 _geom_angle_publ_flag
O1A Co1 O2A 118.57(9) 4_565 2_546 ?
O1A Co1 O1B 91.53(9) 4_565 2_655 ?
O2A Co1 O1B 149.50(9) 2_546 2_655 ?
O1A Co1 N2B 87.11(9) 4_565 . ?
O2A Co1 N2B 87.36(9) 2_546 . ?
O1B Co1 N2B 89.53(10) 2_655 . ?
O1A Co1 N1A 90.06(9) 4_565 . ?
O2A Co1 N1A 92.31(9) 2_546 . ?
O1B Co1 N1A 92.48(9) 2_655 . ?
N2B Co1 N1A 176.57(10) . . ?
O1A Co1 O2B 151.13(9) 4_565 2_655 ?
O2A Co1 O2B 89.43(8) 2_546 2_655 ?
O1B Co1 O2B 60.11(8) 2_655 2_655 ?
N2B Co1 O2B 87.36(9) . 2_655 ?
N1A Co1 O2B 96.05(9) . 2_655 ?
O1A Co1 C1B 121.24(10) 4_565 2_655 ?
O2A Co1 C1B 119.15(10) 2_546 2_655 ?
O1B Co1 C1B 30.36(9) 2_655 2_655 ?
N2B Co1 C1B 85.41(11) . 2_655 ?
N1A Co1 C1B 97.72(10) . 2_655 ?
O2B Co1 C1B 29.98(9) 2_655 2_655 ?
C1A O1A Co1 151.5(2) . 4_566 ?
C11A N1A C10A 116.8(3) . . ?
C11A N1A Co1 122.3(2) . . ?
C10A N1A Co1 120.9(2) . . ?
O1A C1A O2A 124.7(3) . . ?
O1A C1A C2A 118.4(3) . . ?
O2A C1A C2A 116.9(3) . . ?
C1A O2A Co1 123.9(2) . 2_556 ?
C7A C2A C3A 119.1(3) . . ?
C7A C2A C1A 120.8(3) . . ?
C3A C2A C1A 120.1(3) . . ?
C2A C3A C4A 120.7(3) . . ?
C2A C3A H3A 119.6 . . ?
C4A C3A H3A 119.6 . . ?
C5A C4A C3A 119.2(3) . . ?
C5A C4A C8A 121.5(3) . . ?
C3A C4A C8A 119.3(3) . . ?
C6A C5A C4A 120.5(3) . . ?
C6A C5A H5A 119.7 . . ?
C4A C5A H5A 119.7 . . ?
C5A C6A C7A 120.0(3) . . ?
C5A C6A H6A 120.0 . . ?
C7A C6A H6A 120.0 . . ?
C6A C7A C2A 120.5(3) . . ?
C6A C7A H7A 119.8 . . ?
C2A C7A H7A 119.8 . . ?
C9A C8A C12A 116.3(3) . . ?
C9A C8A C4A 120.7(3) . . ?
C12A C8A C4A 123.0(3) . . ?
C10A C9A C8A 120.1(3) . . ?
C10A C9A H9A 119.9 . . ?
C8A C9A H9A 119.9 . . ?
N1A C10A C9A 123.2(3) . . ?
N1A C10A H10A 118.4 . . ?
C9A C10A H10A 118.4 . . ?
N1A C11A C12A 123.6(3) . . ?
N1A C11A H11A 118.2 . . ?
C12A C11A H11A 118.2 . . ?
C11A C12A C8A 120.1(3) . . ?
C11A C12A H12A 120.0 . . ?
C8A C12A H12A 120.0 . . ?
C1B O1B Co1 91.79(19) . 2_645 ?
O2B C1B O1B 121.1(3) . . ?
O2B C1B C2B 120.7(3) . . ?
O1B C1B C2B 118.1(3) . . ?
O2B C1B Co1 64.01(17) . 2_645 ?
O1B C1B Co1 57.85(15) . 2_645 ?
C2B C1B Co1 168.8(2) . 2_645 ?
C1B O2B Co1 86.01(19) . 2_645 ?
C11B N2B C10B 116.4(3) . . ?
C11B N2B Co1 120.8(2) . . ?
C10B N2B Co1 122.8(2) . . ?
C7B C2B C3B 118.9(3) . . ?
C7B C2B C1B 122.0(3) . . ?
C3B C2B C1B 119.1(3) . . ?
C2B C3B C4B 121.0(3) . . ?
C2B C3B H3B 119.5 . . ?
C4B C3B H3B 119.5 . . ?
C3B C4B C5B 120.6(3) . . ?
C3B C4B H4B 119.7 . . ?
C5B C4B H4B 119.7 . . ?
C4B C5B C6B 118.1(3) . . ?
C4B C5B C8B 120.2(3) . . ?
C6B C5B C8B 121.7(3) . . ?
C7B C6B C5B 121.2(3) . . ?
C7B C6B H6B 119.4 . . ?
C5B C6B H6B 119.4 . . ?
C2B C7B C6B 120.2(3) . . ?
C2B C7B H7B 119.9 . . ?
C6B C7B H7B 119.9 . . ?
C12B C8B C9B 116.1(3) . . ?
C12B C8B C5B 122.4(3) . . ?
C9B C8B C5B 121.4(3) . . ?
C10B C9B C8B 119.6(3) . . ?
C10B C9B H9B 120.2 . . ?
C8B C9B H9B 120.2 . . ?
N2B C10B C9B 123.9(3) . . ?
N2B C10B H10B 118.1 . . ?
C9B C10B H10B 118.1 . . ?
N2B C11B C12B 123.5(3) . . ?
N2B C11B H11B 118.2 . . ?
C12B C11B H11B 118.2 . . ?
C11B C12B C8B 120.5(3) . . ?
C11B C12B H12B 119.7 . . ?
C8B C12B H12B 119.7 . . ?
C2C C1C C6C 119.5(6) . . ?
C2C C1C Cl1C 122.4(5) . . ?
C6C C1C Cl1C 118.0(5) . . ?
C1C C2C C3C 129.0(7) . . ?
C1C C2C H2C 115.5 . . ?
C3C C2C H2C 115.5 . . ?
C2C C3C C4C 109.9(7) . . ?
C2C C3C H3C 125.1 . . ?
C4C C3C H3C 125.1 . . ?
C5C C4C C3C 122.5(7) . . ?
C5C C4C H4C 118.8 . . ?
C3C C4C H4C 118.8 . . ?
C4C C5C C6C 122.4(7) . . ?
C4C C5C H5C 118.8 . . ?
C6C C5C H5C 118.8 . . ?
C1C C6C C5C 116.3(6) . . ?
C1C C6C H6C 121.8 . . ?
C5C C6C H6C 121.8 . . ?
 
loop_
 _geom_torsion_atom_site_label_1
 _geom_torsion_atom_site_label_2
 _geom_torsion_atom_site_label_3
 _geom_torsion_atom_site_label_4
 _geom_torsion
 _geom_torsion_site_symmetry_1
 _geom_torsion_site_symmetry_2
 _geom_torsion_site_symmetry_3
 _geom_torsion_site_symmetry_4
 _geom_torsion_publ_flag
Co1 O1A C1A O2A 76.8(5) 4_566 . . . ?
Co1 O1A C1A C2A -104.1(4) 4_566 . . . ?
O1A C1A O2A Co1 -9.9(4) . . . 2_556 ?
C2A C1A O2A Co1 170.92(19) . . . 2_556 ?
O1A C1A C2A C7A 177.8(3) . . . . ?
O2A C1A C2A C7A -2.9(4) . . . . ?
O1A C1A C2A C3A -1.2(4) . . . . ?
O2A C1A C2A C3A 178.0(3) . . . . ?
C7A C2A C3A C4A 2.1(5) . . . . ?
C1A C2A C3A C4A -178.9(3) . . . . ?
C2A C3A C4A C5A -1.7(5) . . . . ?
C2A C3A C4A C8A 178.3(3) . . . . ?
C3A C4A C5A C6A -0.2(5) . . . . ?
C8A C4A C5A C6A 179.8(3) . . . . ?
C4A C5A C6A C7A 1.7(6) . . . . ?
C5A C6A C7A C2A -1.3(5) . . . . ?
C3A C2A C7A C6A -0.6(5) . . . . ?
C1A C2A C7A C6A -179.6(3) . . . . ?
C5A C4A C8A C9A -141.1(3) . . . . ?
C3A C4A C8A C9A 39.0(5) . . . . ?
C5A C4A C8A C12A 41.2(5) . . . . ?
C3A C4A C8A C12A -138.8(3) . . . . ?
C12A C8A C9A C10A 0.5(5) . . . . ?
C4A C8A C9A C10A -177.5(3) . . . . ?
C11A N1A C10A C9A -1.1(5) . . . . ?
Co1 N1A C10A C9A 177.7(3) . . . . ?
C8A C9A C10A N1A 0.9(5) . . . . ?
C10A N1A C11A C12A -0.1(5) . . . . ?
Co1 N1A C11A C12A -178.8(3) . . . . ?
N1A C11A C12A C8A 1.4(6) . . . . ?
C9A C8A C12A C11A -1.5(5) . . . . ?
C4A C8A C12A C11A 176.3(3) . . . . ?
Co1 O1B C1B O2B -10.1(3) 2_645 . . . ?
Co1 O1B C1B C2B 167.9(3) 2_645 . . . ?
O1B C1B O2B Co1 9.5(3) . . . 2_645 ?
C2B C1B O2B Co1 -168.4(3) . . . 2_645 ?
O2B C1B C2B C7B 0.0(5) . . . . ?
O1B C1B C2B C7B -177.9(3) . . . . ?
Co1 C1B C2B C7B -111.9(12) 2_645 . . . ?
O2B C1B C2B C3B 176.0(3) . . . . ?
O1B C1B C2B C3B -2.0(5) . . . . ?
Co1 C1B C2B C3B 64.0(13) 2_645 . . . ?
C7B C2B C3B C4B -1.3(6) . . . . ?
C1B C2B C3B C4B -177.4(4) . . . . ?
C2B C3B C4B C5B 0.7(6) . . . . ?
C3B C4B C5B C6B 0.2(6) . . . . ?
C3B C4B C5B C8B 178.0(4) . . . . ?
C4B C5B C6B C7B -0.4(6) . . . . ?
C8B C5B C6B C7B -178.2(4) . . . . ?
C3B C2B C7B C6B 1.1(6) . . . . ?
C1B C2B C7B C6B 177.0(4) . . . . ?
C5B C6B C7B C2B -0.2(7) . . . . ?
C4B C5B C8B C12B 157.0(4) . . . . ?
C6B C5B C8B C12B -25.3(5) . . . . ?
C4B C5B C8B C9B -21.3(5) . . . . ?
C6B C5B C8B C9B 156.5(4) . . . . ?
C12B C8B C9B C10B 0.2(5) . . . . ?
C5B C8B C9B C10B 178.5(3) . . . . ?
C11B N2B C10B C9B -0.5(5) . . . . ?
Co1 N2B C10B C9B -177.4(3) . . . . ?
C8B C9B C10B N2B 0.8(5) . . . . ?
C10B N2B C11B C12B -0.8(6) . . . . ?
Co1 N2B C11B C12B 176.2(3) . . . . ?
N2B C11B C12B C8B 1.7(6) . . . . ?
C9B C8B C12B C11B -1.3(5) . . . . ?
C5B C8B C12B C11B -179.6(3) . . . . ?
C6C C1C C2C C3C 2.7(11) . . . . ?
Cl1C C1C C2C C3C -180.0(6) . . . . ?
C1C C2C C3C C4C -1.2(10) . . . . ?
C2C C3C C4C C5C 2.8(11) . . . . ?
C3C C4C C5C C6C -6.1(15) . . . . ?
C2C C1C C6C C5C -5.3(11) . . . . ?
Cl1C C1C C6C C5C 177.2(7) . . . . ?
C4C C5C C6C C1C 7.2(14) . . . . ?
 
loop_
 _geom_hbond_atom_site_label_D 
 _geom_hbond_atom_site_label_H 
 _geom_hbond_atom_site_label_A 
 _geom_hbond_distance_DH 
 _geom_hbond_distance_HA 
 _geom_hbond_distance_DA 
 _geom_hbond_angle_DHA 
 _geom_hbond_site_symmetry_A 
C9A H9A Cl1C  0.93 2.96 3.646(4) 131.2 3_556
C10B H10B O2A  0.93 2.42 2.980(4) 118.4 2_546
C10A H10A O2A  0.93 2.54 3.106(4) 119.5 2_546
C12B H12B Cl1C  0.93 2.92 3.474(4) 119.8 .
C9B H9B O2B  0.93 2.51 3.408(4) 163.6 4_556
 
_refine_diff_density_max    1.282
_refine_diff_density_min   -1.117
_refine_diff_density_rms    0.100

_shelxl_version_number 2014-3

_shelx_res_file
;
TITL C:clbz_a.res
CELL 0.71073 10.2944 16.2718 15.2482 90.000 95.232 90.000
ZERR 4.0000 0.0016 0.0027 0.0027 0.000 0.004 0.000
LATT 1
SYMM -X, 0.5+Y, 0.5-Z
SFAC C H N O CL CO
UNIT 120 84 8 16 4 4
BOND $H
CONF
EQIV $1 1-X,1-Y,1-Z
EQIV $2 1+X,1/2-Y,Z-1/2
EQIV $3 -X,1/2+Y,1/2-Z
EQIV $4 2-X,1-Y,1-Z
EQIV $5 X,1/2-Y,Z-1/2
EQIV $6 -X,-Y,1-Z
EQIV $7 -X,Y-1/2,3/2-Z
EQIV $8 X,-Y-1/2,1/2+Z
HTAB C9A Cl1C_$6
HTAB C10B O2A_$7
HTAB C10A O2A_$7
HTAB C12B Cl1C
HTAB C9B O2B_$8
ACTA
FMAP 2 1 53
PLAN 20 0 0
HTAB 2.0
LIST 6 1
L.S. 10
WGHT    0.072700    4.219600
FVAR       0.26495
CO1   6    0.138207    0.083461    0.467978    11.00000    0.01446    0.01432 =
         0.01510    0.00090    0.00434   -0.00038
O1A   4   -0.022306    0.460352    0.895581    11.00000    0.01759    0.02018 =
         0.02140    0.00021    0.00207    0.00063
N1A   3    0.015663    0.158552    0.543019    11.00000    0.01867    0.01706 =
         0.01899   -0.00146    0.00233   -0.00036
C1A   1   -0.142975    0.469281    0.881992    11.00000    0.01807    0.01579 =
         0.01450    0.00280    0.00597   -0.00050
O2A   4   -0.209580    0.519405    0.922703    11.00000    0.02062    0.01916 =
         0.01988   -0.00729    0.00698   -0.00172
C2A   1   -0.215553    0.417977    0.811551    11.00000    0.01878    0.01579 =
         0.01714   -0.00091    0.00241    0.00036
C3A   1   -0.147727    0.363050    0.761980    11.00000    0.01519    0.01826 =
         0.02002   -0.00168    0.00223    0.00369
AFIX  43
H3A   2   -0.057833    0.357770    0.773479    11.00000   -1.20000
AFIX   0
C4A   1   -0.213599    0.315949    0.695277    11.00000    0.01993    0.01942 =
         0.01872   -0.00318    0.00181    0.00346
C5A   1   -0.348854    0.322756    0.680085    11.00000    0.02320    0.02737 =
         0.02578   -0.00965   -0.00081    0.00022
AFIX  43
H5A   2   -0.393377    0.291806    0.635714    11.00000   -1.20000
AFIX   0
C6A   1   -0.417556    0.375392    0.730703    11.00000    0.01461    0.03565 =
         0.03489   -0.01080    0.00004    0.00435
AFIX  43
H6A   2   -0.507951    0.378510    0.721214    11.00000   -1.20000
AFIX   0
C7A   1   -0.351131    0.423428    0.795576    11.00000    0.01934    0.02495 =
         0.02359   -0.00554    0.00371    0.00486
AFIX  43
H7A   2   -0.397242    0.459427    0.828558    11.00000   -1.20000
AFIX   0
C8A   1   -0.137996    0.259841    0.642158    11.00000    0.01936    0.02161 =
         0.01848   -0.00474    0.00361   -0.00148
C9A   1   -0.032906    0.215137    0.681490    11.00000    0.02704    0.02848 =
         0.01900   -0.00551    0.00060    0.00707
AFIX  43
H9A   2   -0.011604    0.218589    0.741972    11.00000   -1.20000
AFIX   0
C10A  1    0.039732    0.165687    0.630824    11.00000    0.02258    0.02379 =
         0.02395   -0.00333    0.00051    0.00595
AFIX  43
H10A  2    0.108614    0.135895    0.658823    11.00000   -1.20000
AFIX   0
C11A  1   -0.085767    0.201336    0.505065    11.00000    0.02819    0.02485 =
         0.01702   -0.00493   -0.00059    0.00625
AFIX  43
H11A  2   -0.104111    0.197359    0.444356    11.00000   -1.20000
AFIX   0
C12A  1   -0.163956    0.250663    0.550946    11.00000    0.02468    0.02819 =
         0.02245   -0.00519   -0.00456    0.00848
AFIX  43
H12A  2   -0.234241    0.278013    0.521416    11.00000   -1.20000
AFIX   0
O1B   4    0.839480   -0.321231    0.124680    11.00000    0.01797    0.02486 =
         0.02831   -0.00756    0.00387    0.00366
C1B   1    0.727173   -0.303144    0.088702    11.00000    0.02045    0.02129 =
         0.02354   -0.00341    0.00482    0.00173
O2B   4    0.685397   -0.333393    0.015712    11.00000    0.02572    0.02867 =
         0.02304   -0.00886    0.00226    0.00585
N2B   3    0.251618    0.002912    0.392418    11.00000    0.01863    0.02229 =
         0.01905   -0.00288    0.00401    0.00329
C2B   1    0.643079   -0.246512    0.137355    11.00000    0.02207    0.02577 =
         0.02462   -0.00820    0.00425    0.00465
C3B   1    0.689357   -0.218436    0.220227    11.00000    0.01775    0.04622 =
         0.03642   -0.02053   -0.00120    0.00885
AFIX  43
H3B   2    0.772792   -0.233074    0.243512    11.00000   -1.20000
AFIX   0
C4B   1    0.613183   -0.168875    0.268934    11.00000    0.02195    0.04885 =
         0.03453   -0.02324   -0.00083    0.00689
AFIX  43
H4B   2    0.646356   -0.150209    0.324134    11.00000   -1.20000
AFIX   0
C5B   1    0.487530   -0.146832    0.235918    11.00000    0.01919    0.02333 =
         0.02575   -0.00474    0.00559    0.00509
C6B   1    0.440983   -0.176192    0.152936    11.00000    0.02798    0.05266 =
         0.02748   -0.01146   -0.00427    0.01971
AFIX  43
H6B   2    0.357068   -0.162418    0.129853    11.00000   -1.20000
AFIX   0
C7B   1    0.517670   -0.225586    0.104220    11.00000    0.02953    0.04682 =
         0.02404   -0.01237   -0.00298    0.01708
AFIX  43
H7B   2    0.484721   -0.244689    0.049148    11.00000   -1.20000
AFIX   0
C8B   1    0.405097   -0.095991    0.289703    11.00000    0.01562    0.02253 =
         0.02386   -0.00605    0.00483    0.00300
C9B   1    0.429820   -0.091309    0.381832    11.00000    0.01837    0.02619 =
         0.02478   -0.00001    0.00161    0.00718
AFIX  43
H9B   2    0.497714   -0.121364    0.410664    11.00000   -1.20000
AFIX   0
C10B  1    0.352732   -0.041869    0.429097    11.00000    0.02192    0.02627 =
         0.01712   -0.00237    0.00449    0.00577
AFIX  43
H10B  2    0.371526   -0.039223    0.489855    11.00000   -1.20000
AFIX   0
C11B  1    0.228065   -0.002011    0.304638    11.00000    0.02575    0.03983 =
         0.02241   -0.00355    0.00034    0.01740
AFIX  43
H11B  2    0.158287    0.027677    0.277641    11.00000   -1.20000
AFIX   0
C12B  1    0.301551   -0.048614    0.252330    11.00000    0.02872    0.03981 =
         0.01958   -0.00664   -0.00086    0.01386
AFIX  43
H12B  2    0.282002   -0.048513    0.191569    11.00000   -1.20000
AFIX   0
CL1C  5    0.021312   -0.094239    0.116642    11.00000    0.11136    0.10995 =
         0.08968    0.01544   -0.04568   -0.01781
C1C   1   -0.122747   -0.078196    0.052078    11.00000    0.08055    0.06090 =
         0.04883    0.01132   -0.01202   -0.01356
C2C   1   -0.160995   -0.126256   -0.016781    11.00000    0.09898    0.05570 =
         0.05634   -0.01208   -0.00035    0.00255
AFIX  43
H2C   2   -0.104562   -0.168997   -0.027453    11.00000   -1.20000
AFIX   0
C3C   1   -0.272268   -0.121222   -0.074016    11.00000    0.05875    0.08993 =
         0.13125    0.05539   -0.03892   -0.00226
AFIX  43
H3C   2   -0.292817   -0.156095   -0.121585    11.00000   -1.20000
AFIX   0
C4C   1   -0.352916   -0.053132   -0.048904    11.00000    0.08104    0.10983 =
         0.07701   -0.02864   -0.01538    0.02088
AFIX  43
H4C   2   -0.433159   -0.044293   -0.080686    11.00000   -1.20000
AFIX   0
C5C   1   -0.315249   -0.001927    0.019355    11.00000    0.10304    0.14039 =
         0.09898   -0.05537   -0.00490    0.03797
AFIX  43
H5C   2   -0.366606    0.043650    0.028929    11.00000   -1.20000
AFIX   0
C6C   1   -0.203012   -0.015253    0.075178    11.00000    0.11910    0.08965 =
         0.09287   -0.05165   -0.01626    0.02681
AFIX  43
H6C   2   -0.182960    0.016435    0.125348    11.00000   -1.20000
AFIX   0
HKLF 4

REM  C:clbz_a.res
REM R1 =  0.0550 for    4493 Fo > 4sig(Fo)  and  0.0857 for all    6296 data
REM    343 parameters refined using      0 restraints

END

WGHT      0.0727      4.2192

REM Instructions for potential hydrogen bonds
HTAB C9A Cl1C_$6
HTAB C10A O2A_$7
HTAB C9B O2B_$8
HTAB C10B O2A_$7
HTAB C12B Cl1C

REM Highest difference peak  1.282,  deepest hole -1.117,  1-sigma level  0.100
Q1    1  -0.2569 -0.1581 -0.1187  11.00000  0.05    1.28
Q2    1  -0.0688 -0.0384  0.1614  11.00000  0.05    0.73
Q3    1  -0.2655 -0.0641  0.0384  11.00000  0.05    0.65
Q4    1  -0.0549 -0.1013 -0.0008  11.00000  0.05    0.62
Q5    1   0.4136 -0.0844  0.3397  11.00000  0.05    0.36
Q6    1   0.7444 -0.3811  0.1421  11.00000  0.05    0.35
Q7    1  -0.2088 -0.0008  0.0606  11.00000  0.05    0.34
Q8    1  -0.2793  0.4219  0.8001  11.00000  0.05    0.33
Q9    1   0.5394 -0.1606  0.2583  11.00000  0.05    0.33
Q10   1   0.4530 -0.1213  0.2613  11.00000  0.05    0.32
Q11   1  -0.1684  0.2454  0.6000  11.00000  0.05    0.32
Q12   1   0.5782 -0.2388  0.1261  11.00000  0.05    0.31
Q13   1   0.2865 -0.0338  0.4021  11.00000  0.05    0.31
Q14   1  -0.2771  0.3241  0.6876  11.00000  0.05    0.30
Q15   1   0.6809 -0.1949  0.1792  11.00000  0.05    0.30
Q16   1  -0.1918  0.5363  0.9626  11.00000  0.05    0.30
Q17   1  -0.1733  0.2867  0.6690  11.00000  0.05    0.29
Q18   1   0.2877  0.1016  0.2870  11.00000  0.05    0.29
Q19   1  -0.5049  0.0190 -0.0350  11.00000  0.05    0.29
Q20   1  -0.1000 -0.0993 -0.0549  11.00000  0.05    0.28
;
_shelx_res_checksum   84144

_shelx_hkl_file
;
   1   0   0  856.41   28.80
   1   0   0  915.31   28.50
  -1   0   0  880.81   28.10
  -1   0   0  848.62   28.90
  -1   0   0  878.61   28.90
  -1   0   0  882.71   28.30
  -1   0   0  857.01   28.20
   2   0   0  327.87   12.50
  -2   0   0  342.97   12.00
  -2   0   0  330.57   11.90
  -2   0   0  352.06   13.00
  -2   0   0  344.27   12.70
  -2   0   0  333.37   12.00
  -2   0   0  331.17   12.60
   2   0   0  348.27   12.40
  -3   0   0   16.10    2.80
   3   0   0   17.10    2.80
  -3   0   0   13.10    2.20
   3   0   0   15.20    2.70
  -3   0   0   20.80    3.80
  -3   0   0   16.00    2.90
  -3   0   0   13.90    2.30
  -3   0   0   18.10    2.40
  -4   0   0  226.98    9.90
  -4   0   0  231.58    9.90
  -4   0   0  243.38   11.70
   4   0   0  223.18   10.50
   4   0   0  227.28   10.50
  -4   0   0  226.48    9.40
  -4   0   0  226.48   11.60
  -4   0   0  224.38   10.60
  -5   0   0  100.99    5.50
   5   0   0   98.29    6.80
  -5   0   0  100.19    6.30
  -5   0   0  101.79    6.30
  -5   0   0   95.09    6.80
  -5   0   0   94.79    9.20
   5   0   0  100.79    7.00
  -6   0   0  800.82   27.60
  -6   0   0  778.32   31.50
   6   0   0  782.52   29.90
  -6   0   0  784.12   29.30
  -6   0   0  764.72   30.10
  -6   0   0  796.72   29.20
  -7   0   0  419.36   15.40
  -7   0   0  396.66   17.90
  -7   0   0  380.86   20.10
  -7   0   0  389.86   18.60
  -7   0   0  457.15   18.70
   7   0   0  391.26   18.50
  -8   0   0  228.88   13.10
  -8   0   0  230.28   15.30
   8   0   0  212.08   13.20
  -8   0   0  244.98   13.10
  -8   0   0  215.38   13.20
   9   0   0    9.00    4.60
  -9   0   0    2.30    4.60
  -9   0   0   10.00    4.50
  -9   0   0    1.60    3.30
  -9   0   0    3.90    3.30
 -10   0   0  138.19   12.50
 -10   0   0  114.79   11.90
 -10   0   0  128.89   12.70
 -11   0   0  223.48   15.90
 -11   0   0  232.28   15.80
 -12   0   0   17.90    6.60
 -12   0   0   -2.60    4.10
 -13   0   0   -3.10    5.50
 -13   0   0    0.50    4.90
   0  -1   0    0.30    0.60
   0  -1   0   -0.40    0.50
   0   1   0   -0.70    0.40
   0   1   0   -0.40    0.40
  -1  -1   0  168.88    5.90
   1  -1   0  170.88    6.80
   1  -1   0  163.08    6.80
  -1  -1   0  161.28    6.40
  -1  -1   0  161.08    5.90
  -1   1   0  167.18    6.90
  -1   1   0  163.98    6.80
  -1   1   0  173.78    6.70
  -1   1   0  162.98    6.90
   1   1   0  170.28    5.90
   2  -1   0    1.00    1.70
  -2  -1   0    3.30    1.30
   2  -1   0    2.30    1.80
  -2  -1   0    2.20    0.60
  -2  -1   0    1.10    0.50
  -2  -1   0    1.90    1.90
  -2  -1   0    1.30    2.00
  -2  -1   0    1.90    1.30
  -2   1   0    0.50    1.60
   2   1   0    1.90    1.00
  -2   1   0    0.80    1.80
  -2   1   0    0.00    1.50
  -2   1   0    1.80    1.40
   2   1   0    4.10    1.20
  -2   1   0    0.40    1.30
   3  -1   0  247.58   10.90
   3  -1   0  252.77   10.90
  -3  -1   0  240.88    9.90
  -3  -1   0  241.48    9.90
  -3  -1   0  247.68    8.40
  -3  -1   0  235.78    8.90
  -3  -1   0  242.48    8.30
  -3  -1   0  247.78   11.30
  -3  -1   0  237.88    8.90
  -3   1   0  248.88   10.90
   3   1   0  245.58    9.70
  -3   1   0  243.38   10.30
  -3   1   0  238.98   11.10
  -3   1   0  219.88   10.00
  -3   1   0  240.78   10.20
   3   1   0  238.38    9.40
   4  -1   0  163.68    8.90
  -4  -1   0  167.68    6.20
  -4  -1   0  174.68    8.30
   4  -1   0  185.88    9.30
  -4  -1   0  145.69    7.10
  -4  -1   0  172.98    9.80
  -4  -1   0  164.98    8.10
  -4  -1   0  164.08    7.30
  -4   1   0  166.68    8.40
  -4   1   0  176.18    8.60
   4   1   0  154.98    7.70
  -4   1   0  169.18    9.60
  -4   1   0  144.59    7.90
   4   1   0  161.48    7.80
  -4   1   0  167.08    9.00
   5  -1   0  221.78   11.60
  -5  -1   0  225.58   10.80
  -5  -1   0  228.18   10.00
  -5  -1   0  217.68   12.40
  -5  -1   0  232.58   10.10
  -5  -1   0  226.68   11.00
  -5  -1   0  227.08    8.20
   5  -1   0  233.28   11.60
   5   1   0  223.98   10.40
   5   1   0  217.88   10.50
  -5   1   0  219.88   10.90
  -5   1   0  223.18   11.60
  -5   1   0  241.08   11.30
  -5   1   0  230.88   10.50
  -5   1   0  220.18   12.30
  -6  -1   0  177.48    8.90
  -6  -1   0  178.88    9.80
   6  -1   0  172.98   10.40
  -6  -1   0  164.88    9.50
  -6  -1   0  144.79    8.40
  -6  -1   0  162.98   11.20
  -6   1   0  149.39    8.40
   6   1   0  170.08    9.40
  -6   1   0  176.58   10.00
   6   1   0  164.88    9.00
  -6   1   0  167.58   11.30
  -6   1   0  164.38    9.40
  -6   1   0  156.58   10.00
  -7  -1   0   -0.20    3.30
  -7  -1   0   -2.40    1.60
  -7  -1   0   -0.60    2.40
  -7  -1   0    1.00    2.00
   7  -1   0    5.20    3.20
  -7   1   0    2.70    2.60
   7   1   0    0.90    2.90
  -7   1   0   -0.30    2.70
  -7   1   0    1.30    2.40
  -7   1   0    2.70    3.60
  -7   1   0   -3.50    1.50
   8  -1   0   38.10    6.80
  -8  -1   0   36.90    7.90
  -8  -1   0   36.10    5.60
  -8  -1   0   28.10    4.80
  -8  -1   0   48.80    6.50
  -8   1   0   39.50    8.20
  -8   1   0   47.00    6.90
   8   1   0   48.70    6.70
  -8   1   0   44.40    6.90
  -8   1   0   40.10    4.60
  -8   1   0   41.40    6.40
   9  -1   0   34.20    7.30
  -9  -1   0   35.50    6.50
  -9  -1   0   48.80    6.80
  -9  -1   0   43.10    6.20
  -9   1   0   41.90    8.80
  -9   1   0   39.10    6.80
  -9   1   0   58.99    8.00
  -9   1   0   52.79    8.00
 -10  -1   0   -0.10    3.00
 -10  -1   0    1.00    3.70
 -10  -1   0   -1.30    2.80
 -10   1   0    5.90    4.10
 -10   1   0    7.80    4.50
 -11  -1   0    9.90    4.80
 -11  -1   0    8.30    4.60
 -11   1   0    4.10    5.30
 -11   1   0    9.00    5.20
 -12  -1   0   14.10    5.30
 -12  -1   0   22.80    6.80
 -12   1   0   13.50    6.70
 -12   1   0   18.60    6.70
 -13  -1   0    2.30    5.40
 -13  -1   0   -0.70    5.10
 -13   1   0    5.90    6.30
 -13   1   0   -5.50    4.30
   0  -2   0  265.17    9.90
   0  -2   0  279.87   10.40
   0  -2   0  275.97   10.20
   0   2   0  274.27   10.10
   0   2   0  286.67   10.30
  -1  -2   0  158.08    6.40
  -1  -2   0  169.18    6.50
   1  -2   0  177.18    7.70
  -1  -2   0  164.78    6.70
   1   2   0  165.08    6.30
  -1   2   0  158.08    7.10
  -1   2   0  179.48    7.50
   1   2   0  163.98    6.00
  -1   2   0  172.68    7.60
  -2  -2   0  475.55   16.40
   2  -2   0  474.95   18.30
   2  -2   0  493.65   18.20
  -2  -2   0  454.35   18.00
  -2  -2   0  477.25   16.40
  -2   2   0  486.45   17.10
  -2   2   0  451.25   17.60
   2   2   0  465.45   16.20
   2   2   0  480.35   15.60
  -2   2   0  468.75   18.20
  -2   2   0  500.95   17.70
  -3  -2   0   14.50    2.20
  -3  -2   0   10.70    3.20
   3  -2   0   13.50    3.30
  -3  -2   0   10.80    1.90
   3  -2   0   11.80    3.20
  -3  -2   0   10.60    3.10
  -3   2   0   12.30    3.10
  -3   2   0    8.70    2.60
   3   2   0   12.50    1.70
   3   2   0   10.00    1.80
  -3   2   0    8.30    2.70
  -3   2   0    8.20    2.40
  -3   2   0   11.90    2.40
  -4  -2   0    0.20    1.00
  -4  -2   0    0.10    1.70
  -4  -2   0   -1.30    1.40
  -4  -2   0    2.30    2.60
   4  -2   0    3.90    2.60
  -4  -2   0    1.40    1.10
   4  -2   0    1.90    2.50
  -4   2   0    1.30    1.90
  -4   2   0    2.50    2.10
  -4   2   0    1.20    2.50
  -4   2   0    1.40    1.70
   4   2   0    3.00    1.70
   4   2   0    1.00    1.40
  -4   2   0    6.30    2.80
  -5  -2   0  113.19    8.40
  -5  -2   0  106.69    6.50
  -5  -2   0  113.19    6.60
   5  -2   0  104.49    8.00
  -5  -2   0  109.19    5.70
  -5  -2   0   98.39    5.50
  -5   2   0  105.59    7.30
  -5   2   0   95.59    9.00
  -5   2   0  108.19    7.10
   5   2   0  107.69    6.10
   5   2   0  106.09    6.30
  -5   2   0  124.99    8.40
  -5   2   0  116.09    7.50
  -6  -2   0   18.00    3.00
  -6  -2   0    5.60    2.40
  -6  -2   0   14.20    3.20
  -6  -2   0   10.70    4.40
  -6  -2   0   13.40    2.70
   6  -2   0    8.50    3.40
  -6   2   0   10.20    3.70
  -6   2   0    9.40    2.90
   6   2   0   10.20    2.60
  -6   2   0    9.20    3.10
  -6   2   0   10.40    3.20
  -6   2   0    7.40    3.70
   6   2   0   13.80    3.20
   7  -2   0   22.20    5.30
  -7  -2   0   14.20    3.20
  -7  -2   0   18.10    3.70
  -7  -2   0   20.50    5.70
  -7  -2   0   21.60    4.10
  -7   2   0   15.60    4.40
   7   2   0   27.30    4.50
  -7   2   0   18.30    4.80
  -7   2   0   17.40    3.70
  -7   2   0   31.50    6.90
  -7   2   0   23.50    5.30
  -8  -2   0   64.59    7.10
   8  -2   0   91.49   10.10
  -8  -2   0   71.89    7.20
  -8  -2   0   61.29    6.80
  -8   2   0   74.49    8.90
  -8   2   0   89.19    7.70
  -8   2   0   54.49    8.00
  -8   2   0   65.99    8.10
   8   2   0   67.89    7.70
  -8   2   0   96.29   12.00
   9  -2   0   63.89    9.30
  -9  -2   0   69.09    8.00
  -9  -2   0   59.69    7.20
  -9  -2   0   66.59    7.80
  -9   2   0   57.19    8.30
  -9   2   0   48.90    9.70
  -9   2   0   50.69    8.30
  -9   2   0   46.80    7.80
 -10  -2   0    7.90    4.10
 -10  -2   0   10.30    3.90
  10  -2   0    3.00    4.30
 -10  -2   0    8.70    4.10
 -10   2   0   10.50    5.30
 -10   2   0    4.20    4.20
 -10   2   0    5.10    6.30
 -11  -2   0   33.00    6.80
 -11  -2   0   41.40    7.40
 -11   2   0   41.30    8.30
 -11   2   0   30.40    8.10
 -12  -2   0   12.80    5.80
 -12  -2   0    7.50    4.90
 -12   2   0   13.90    6.60
 -12   2   0   19.80    7.50
 -13  -2   0    0.20    4.90
 -13  -2   0   -4.00    4.10
 -13   2   0   -7.90    5.50
   0  -3   0   -1.30    1.20
   0  -3   0    0.70    1.50
   0  -3   0   -1.30    1.20
   0   3   0   -0.40    1.40
   0   3   0    0.40    1.60
   1  -3   0   79.49    5.70
  -1  -3   0   87.69    4.60
  -1  -3   0   83.49    4.60
  -1  -3   0   83.09    4.00
  -1  -3   0   83.99    3.90
  -1  -3   0   87.59    4.50
  -1  -3   0   84.39    4.10
  -1   3   0   89.29    5.00
  -1   3   0   84.19    5.40
   1   3   0   85.59    4.40
  -1   3   0   85.19    5.60
   1   3   0   98.29    4.30
  -2  -3   0 3469.95  109.59
  -2  -3   0 3576.04  114.49
  -2  -3   0 3447.35  114.49
  -2   3   0 3629.54  109.99
   2   3   0 3627.04  112.59
  -2   3   0 3509.95  114.89
  -2   3   0 3638.54  116.79
  -2   3   0 3397.96  112.69
   2   3   0 3446.06  114.19
   3  -3   0    4.00    3.00
  -3  -3   0    5.10    2.70
  -3  -3   0   12.60    1.90
  -3  -3   0   11.50    1.90
  -3   3   0    8.60    3.00
   3   3   0   10.50    1.70
  -3   3   0    9.10    3.30
  -3   3   0   14.50    3.20
  -3   3   0   12.10    3.10
   3   3   0   11.70    1.50
  -3   3   0   12.00    2.90
  -4  -3   0  109.39    5.60
  -4  -3   0  108.59    4.40
  -4  -3   0  104.39    4.40
   4  -3   0   99.69    7.80
  -4  -3   0  113.39    5.70
  -4  -3   0  107.19    7.90
   4   3   0  107.79    5.20
  -4   3   0  120.69    7.80
  -4   3   0  111.39    7.30
  -4   3   0  110.99    8.00
  -4   3   0  100.59    7.20
  -4   3   0   98.59    7.10
   5  -3   0  485.65   20.50
  -5  -3   0  441.86   16.20
  -5  -3   0  480.25   17.70
  -5  -3   0  470.85   17.70
  -5  -3   0  447.06   16.30
  -5  -3   0  465.25   20.80
  -5   3   0  461.05   19.30
  -5   3   0  464.65   20.60
  -5   3   0  432.06   19.50
  -5   3   0  460.45   19.60
  -5   3   0  459.25   19.90
   5   3   0  438.36   17.00
  -6  -3   0  377.86   15.40
  -6  -3   0  353.16   15.10
  -6  -3   0  372.36   14.30
  -6  -3   0  358.96   14.20
   6  -3   0  330.57   17.40
  -6   3   0  353.26   16.40
  -6   3   0  366.26   18.10
   6   3   0  356.76   14.90
  -6   3   0  388.26   17.70
  -6   3   0  377.16   18.20
  -6   3   0  340.67   16.90
  -7  -3   0   60.09    5.60
  -7  -3   0   65.09    6.30
  -7  -3   0   57.09    5.40
   7  -3   0   60.39    7.90
  -7   3   0   47.10    6.70
  -7   3   0   59.99    8.90
   7   3   0   61.89    6.30
  -7   3   0   49.70    7.70
  -7   3   0   56.49    7.20
  -7   3   0   65.99    7.20
  -8  -3   0   42.60    5.40
  -8  -3   0   28.50    4.80
  -8  -3   0   35.00    4.70
   8  -3   0   37.60    7.10
  -8   3   0   32.60    6.10
  -8   3   0   33.60    6.50
  -8   3   0   25.60    5.50
  -8   3   0   40.80    5.70
  -8   3   0   32.30    7.10
  -9  -3   0  111.69    8.70
  -9  -3   0  115.19    8.90
  -9  -3   0  119.69    8.90
   9  -3   0  141.29   14.20
  -9   3   0  130.19   13.10
  -9   3   0  123.39    9.00
  -9   3   0  131.89   13.30
  -9   3   0  119.89   14.00
  10  -3   0   23.10    7.00
 -10  -3   0   10.00    4.10
 -10  -3   0   18.50    4.90
 -10   3   0    5.50    6.30
 -10   3   0   15.30    5.50
 -10   3   0    3.30    5.20
 -11  -3   0    6.30    3.90
 -11  -3   0    0.80    3.70
 -11   3   0    3.60    4.90
 -11   3   0    4.90    5.70
 -12  -3   0   43.90    7.70
 -12  -3   0   43.10    8.20
 -12   3   0   35.90    9.50
 -13  -3   0   19.50    6.20
 -13   3   0   47.90   11.20
   0  -4   0   56.39    4.90
   0  -4   0   48.60    4.20
   0  -4   0   57.19    4.20
   0   4   0   62.49    3.60
   0   4   0   61.39    4.50
   0   4   0   66.39    4.80
   1  -4   0    2.50    2.00
  -1  -4   0    8.20    1.90
  -1  -4   0   10.40    2.40
   1  -4   0   13.90    3.30
  -1  -4   0    9.30    2.10
  -1  -4   0    4.50    2.00
  -1  -4   0    3.10    1.50
  -1  -4   0    3.70    1.60
  -1   4   0    4.50    2.60
   1   4   0    8.40    2.10
  -1   4   0   10.10    2.50
  -1   4   0    7.80    2.90
   1   4   0    5.30    1.90
  -2  -4   0  741.93   25.80
  -2  -4   0  727.13   24.30
   2  -4   0  740.53   27.80
  -2  -4   0  718.73   24.40
  -2  -4   0  712.23   25.20
  -2  -4   0  745.13   25.70
  -2   4   0  794.82   28.60
   2   4   0  716.43   25.40
  -2   4   0  745.73   26.70
  -2   4   0  771.92   27.40
   2   4   0  725.23   24.90
  -3  -4   0   18.60    4.20
  -3  -4   0   14.00    2.20
   3  -4   0   11.90    3.80
  -3  -4   0   16.20    2.30
  -3   4   0   16.30    3.30
   3   4   0   12.50    1.90
  -3   4   0   13.70    3.40
   3   4   0   15.80    1.90
  -3   4   0   16.20    4.10
  -3   4   0   10.10    2.90
  -4  -4   0  163.68   10.30
  -4  -4   0  170.58    7.60
  -4  -4   0  175.98    7.80
   4  -4   0  171.78   10.70
  -4   4   0  183.18   10.90
  -4   4   0  170.58    9.60
  -4   4   0  173.68   10.00
  -4   4   0  147.19    9.50
  -4   4   0  178.88   10.10
   4   4   0  170.38    7.10
  -5  -4   0   -1.30    1.50
  -5  -4   0    1.20    1.10
   5  -4   0   -6.70    2.30
  -5  -4   0   -1.00    1.30
  -5  -4   0   -2.90    2.50
  -5  -4   0    0.20    1.00
  -5   4   0    0.40    2.20
  -5   4   0   -1.80    2.70
   5   4   0    0.30    1.50
  -5   4   0   -0.90    1.90
  -5   4   0    0.90    2.70
  -5   4   0   -3.40    1.90
  -6  -4   0    4.40    2.20
  -6  -4   0    2.40    1.60
  -6  -4   0    1.60    1.70
  -6  -4   0    5.10    1.80
   6  -4   0    1.70    3.70
  -6   4   0   -0.30    2.60
  -6   4   0    1.10    2.60
  -6   4   0    5.20    3.40
  -6   4   0    1.00    2.10
   6   4   0    1.80    1.90
  -6   4   0    7.40    3.60
  -7  -4   0  199.68   10.00
  -7  -4   0  227.88   10.30
   7  -4   0  207.58   14.30
  -7  -4   0  231.98   11.00
  -7   4   0  240.28   14.60
  -7   4   0  223.48   13.60
  -7   4   0  204.58   12.30
   7   4   0  214.68   10.80
  -7   4   0  226.28   13.60
  -7   4   0  208.68   13.80
  -8  -4   0    7.20    2.80
  -8  -4   0    4.50    2.60
   8  -4   0    5.80    4.90
  -8  -4   0    7.00    2.90
  -8   4   0    9.20    5.10
  -8   4   0    6.10    3.40
  -8   4   0    8.20    4.00
  -8   4   0    9.00    4.90
  -9  -4   0    3.80    2.90
  -9  -4   0    6.20    3.10
   9  -4   0   10.90    5.10
  -9   4   0    7.00    5.70
  -9   4   0    5.10    3.60
  -9   4   0    6.50    4.20
  -9   4   0    7.90    4.80
  10  -4   0    5.10    4.90
 -10  -4   0   -5.70    2.40
 -10  -4   0    0.00    3.00
 -10   4   0   -2.10    4.30
 -10   4   0   12.10    6.40
 -10   4   0    5.00    5.30
 -11  -4   0   24.00    5.60
  11  -4   0   23.60    7.90
 -11  -4   0   23.90    5.60
 -11   4   0   33.40    8.50
 -12  -4   0   -5.60    3.30
 -12   4   0    4.30    6.60
 -13  -4   0   -6.00    3.70
 -13   4   0   -5.60    6.50
   0  -5   0    0.60    2.20
   0  -5   0    0.40    1.80
   0  -5   0   -0.70    1.90
   0   5   0    0.20    2.30
   0   5   0    0.40    2.10
   0   5   0    1.60    1.60
   1  -5   0   78.19    7.00
  -1  -5   0   65.29    4.30
  -1  -5   0   62.19    5.50
  -1  -5   0   66.99    4.60
  -1  -5   0   63.49    4.70
  -1  -5   0   72.09    4.60
   1  -5   0   72.19    6.00
  -1   5   0   78.49    5.90
   1   5   0   65.99    4.90
  -1   5   0   61.49    4.70
  -1   5   0   64.59    6.30
   1   5   0   66.79    4.90
  -2  -5   0    1.90    2.00
  -2  -5   0    6.70    2.10
  -2  -5   0    1.80    1.40
  -2  -5   0    2.40    2.00
   2  -5   0   -2.40    2.70
  -2  -5   0    0.30    1.20
   2   5   0    4.10    1.80
   2   5   0    3.90    1.70
  -2   5   0    2.80    2.80
  -2   5   0    2.50    2.80
  -2   5   0   -1.40    2.20
   2   5   0    3.50    1.50
  -3  -5   0    7.30    2.10
  -3  -5   0    3.80    1.20
  -3  -5   0    4.10    1.70
  -3  -5   0    3.70    1.20
   3  -5   0    3.50    3.20
  -3  -5   0    5.00    3.10
  -3  -5   0    7.30    2.80
  -3   5   0    4.00    2.50
   3   5   0    3.60    1.60
  -3   5   0    9.20    3.30
  -3   5   0    2.70    2.80
   3   5   0    5.60    1.70
  -3   5   0    1.20    3.10
  -3   5   0    8.40    3.00
  -4  -5   0  211.78   12.50
  -4  -5   0  232.38    8.50
  -4  -5   0  235.98   10.00
  -4  -5   0  234.18    9.90
   4  -5   0  237.38   13.50
  -4   5   0  230.08   13.00
  -4   5   0  230.98   11.80
  -4   5   0  228.48   12.60
   4   5   0  229.48    9.30
  -4   5   0  257.77   13.00
  -5  -5   0   20.90    5.10
  -5  -5   0   22.40    3.10
  -5  -5   0   20.80    2.10
  -5  -5   0   20.70    2.90
   5  -5   0   14.30    4.90
  -5   5   0   22.90    4.80
  -5   5   0   22.50    5.40
  -5   5   0   30.80    5.40
   5   5   0   22.00    2.80
  -5   5   0   20.90    4.60
  -5   5   0   16.90    3.90
  -6  -5   0   85.59    4.90
   6  -5   0   84.39   10.00
  -6  -5   0   77.89    5.50
  -6  -5   0   84.39    5.50
  -6  -5   0   60.29    8.30
   6   5   0   81.99    5.30
  -6   5   0   81.19    8.70
  -6   5   0   70.79    8.70
  -6   5   0  100.29   10.10
  -6   5   0   84.09    8.70
  -6   5   0   81.39    9.20
   7  -5   0   79.19    9.90
  -7  -5   0   71.39    5.50
  -7  -5   0   70.29    5.10
  -7   5   0   61.69    7.90
  -7   5   0   79.29   10.00
  -7   5   0   73.59    9.60
  -7   5   0   66.19    8.20
  -8  -5   0   90.89    6.80
  -8  -5   0   85.49    6.50
   8  -5   0  114.49   12.70
  -8   5   0   97.19   11.50
  -8   5   0   86.29   11.20
  -8   5   0   83.99   10.30
  -8   5   0   98.09   10.30
   9  -5   0   -0.80    4.60
  -9  -5   0    0.60    2.40
  -9  -5   0    3.40    2.80
  -9   5   0   -4.40    3.90
  -9   5   0    1.30    4.40
  -9   5   0    1.80    4.10
  -9   5   0    0.20    3.30
 -10  -5   0   -2.70    2.60
  10  -5   0   -6.50    4.90
 -10  -5   0   -1.90    2.90
 -10   5   0    0.30    5.20
 -10   5   0    0.30    4.40
  11  -5   0   -4.80    5.20
 -11  -5   0    5.60    3.90
 -11  -5   0    9.80    4.00
 -11  -5   0    4.00    3.60
 -11   5   0   15.00    7.10
 -11   5   0    2.10    5.40
 -12  -5   0   22.70    5.80
 -12  -5   0   13.20    5.30
 -12   5   0    2.40    7.10
 -13  -5   0   18.70    6.20
 -13   5   0   39.00   10.40
   0  -6   0   16.50    3.50
   0  -6   0   34.50    4.40
   0  -6   0   17.00    3.30
   0   6   0   22.30    3.00
   0   6   0   22.30    4.00
   0   6   0   20.10    3.80
  -1  -6   0  143.79    8.30
   1  -6   0  130.39    8.70
  -1  -6   0  146.59    6.80
  -1  -6   0  136.09    7.50
   1  -6   0  162.68    8.90
  -1  -6   0  145.49    7.50
  -1  -6   0  141.39    7.60
  -1   6   0  126.79    8.50
   1   6   0  138.89    7.80
   1   6   0  151.08    7.90
  -1   6   0  133.49    7.40
   1   6   0  137.99    6.10
  -1   6   0  148.79    9.00
  -2  -6   0  169.58    8.90
  -2  -6   0  172.48    7.30
  -2  -6   0  164.18    7.90
  -2  -6   0  160.88    8.20
   2  -6   0  165.78   10.70
  -2  -6   0  176.38    8.60
  -2  -6   0  169.28    7.80
   2  -6   0  177.08   10.10
  -2   6   0  179.88   10.40
  -2   6   0  156.78    9.10
  -2   6   0  195.38   10.90
   2   6   0  167.08    8.20
   2   6   0  166.88    7.10
   2   6   0  172.58    8.20
  -3  -6   0  188.18   10.20
  -3  -6   0  220.38    9.70
  -3  -6   0  199.68    8.70
  -3  -6   0  206.68    8.70
  -3  -6   0  211.28    9.80
  -3   6   0  219.88   12.00
  -3   6   0  211.18   11.60
  -3   6   0  223.08   12.30
  -3   6   0  207.08   10.20
  -3   6   0  229.28   12.60
   3   6   0  228.48    9.30
   3   6   0  200.88    9.10
   4  -6   0  732.13   31.30
  -4  -6   0  780.82   27.60
  -4  -6   0  806.12   31.50
  -4  -6   0  738.73   25.90
  -4  -6   0  782.42   27.40
  -4  -6   0  766.32   25.90
   4   6   0  740.93   26.60
  -4   6   0  762.02   31.70
  -4   6   0  781.82   28.50
  -4   6   0  773.02   30.60
  -4   6   0  761.72   30.60
  -5  -6   0   35.30    6.40
   5  -6   0   42.60    7.20
  -5  -6   0   45.40    4.30
  -5  -6   0   31.50    3.00
  -5  -6   0   38.10    3.90
  -5  -6   0   37.80    3.00
   5   6   0   32.60    3.60
  -5   6   0   31.50    5.30
  -5   6   0   30.60    5.80
  -5   6   0   33.20    5.50
  -5   6   0   45.20    6.40
  -6  -6   0   57.09    8.50
  -6  -6   0   56.79    5.00
  -6  -6   0   54.79    4.90
   6  -6   0   70.79    9.70
  -6  -6   0   48.80    4.00
  -6  -6   0   67.69    4.20
  -6   6   0   48.20    7.10
   6   6   0   58.49    4.50
  -6   6   0   55.09    7.70
  -6   6   0   42.20    7.30
  -6   6   0   67.39    8.50
  -7  -6   0  250.27   11.40
  -7  -6   0  258.67   16.60
   7  -6   0  224.58   16.20
  -7  -6   0  253.27   10.90
  -7   6   0  236.98   16.10
  -7   6   0  232.98   14.60
  -7   6   0  249.48   15.60
  -7   6   0  233.38   14.90
  -8  -6   0  117.59    7.40
   8  -6   0  103.19   12.90
  -8  -6   0  118.49    7.50
  -8   6   0  136.09   13.00
  -8   6   0  122.69   13.20
  -8   6   0  144.39   13.20
  -8   6   0   98.39   12.10
  -9  -6   0    3.10    2.60
  -9  -6   0   -1.00    2.30
  -9  -6   0   -2.40    2.20
   9  -6   0   -5.40    4.50
  -9   6   0    4.80    3.90
  -9   6   0    9.70    5.50
  -9   6   0   -5.10    3.90
 -10  -6   0   36.30    5.20
 -10  -6   0   36.40    5.60
 -10  -6   0   36.90    6.10
  10  -6   0   32.40    9.00
 -10   6   0   48.20   10.10
 -10   6   0   35.50    7.40
 -10   6   0   42.90    9.00
 -11  -6   0   55.49    7.80
 -11  -6   0   54.99    7.40
  11  -6   0   39.90   10.00
 -11   6   0   59.69   11.50
 -11   6   0   53.69   11.20
 -12  -6   0   13.10    5.30
  12  -6   0    1.30    6.60
 -12  -6   0   10.50    4.90
 -12   6   0   -3.20    6.40
 -13  -6   0   -6.90    3.80
 -13   6   0    1.70    7.20
   0  -7   0   10.00    3.40
   0  -7   0   -2.70    1.80
   0  -7   0    1.70    2.00
   0   7   0   -0.80    2.10
   0   7   0    1.10    1.80
   0   7   0   -1.00    2.30
  -1  -7   0    2.50    2.10
  -1  -7   0    0.40    1.90
   1  -7   0    6.40    3.00
  -1  -7   0    0.60    2.40
   1  -7   0    1.90    2.40
  -1  -7   0    0.60    1.60
  -1  -7   0   -2.30    1.80
   1   7   0    0.20    1.30
  -1   7   0   -3.10    2.30
  -1   7   0    1.70    2.60
  -1   7   0   -0.70    2.10
   1   7   0    0.50    2.10
   1   7   0   -1.20    2.10
   2  -7   0    6.80    3.60
   2  -7   0    8.50    3.50
  -2  -7   0   11.30    2.30
  -2  -7   0   12.30    2.70
  -2  -7   0   10.20    3.00
  -2  -7   0    8.70    2.40
  -2  -7   0    6.80    2.40
  -2   7   0    7.50    3.40
  -2   7   0   10.10    3.30
   2   7   0    7.00    2.50
  -2   7   0    6.90    3.60
   2   7   0    9.20    2.80
   2   7   0    8.70    1.80
  -3  -7   0    8.70    2.40
  -3  -7   0    9.80    2.70
  -3  -7   0   14.50    2.60
   3  -7   0    8.70    3.90
  -3  -7   0   12.40    2.30
  -3  -7   0    3.70    2.40
   3   7   0   10.30    2.50
  -3   7   0   11.00    3.00
   3   7   0   15.30    2.50
  -3   7   0   10.20    4.00
  -3   7   0    7.50    3.70
  -3   7   0   11.00    3.70
   3   7   0    9.70    2.50
  -4  -7   0   57.89    7.80
  -4  -7   0   39.40    3.80
   4  -7   0   33.80    6.30
  -4  -7   0   42.80    3.80
  -4  -7   0   35.80    4.40
  -4  -7   0   41.50    4.40
  -4   7   0   39.00    5.40
  -4   7   0   42.10    6.60
   4   7   0   49.80    4.60
  -4   7   0   37.70    6.00
  -4   7   0   43.50    6.40
  -5  -7   0   90.09    5.20
  -5  -7   0   99.69    5.50
   5  -7   0  109.19   11.40
  -5  -7   0   94.09    5.80
  -5  -7   0   92.29   10.40
  -5  -7   0   95.59    6.10
   5   7   0  100.79    5.90
  -5   7   0   95.29   10.40
  -5   7   0  120.09   11.00
  -5   7   0   98.19    9.90
  -5   7   0   97.99    9.20
  -6  -7   0   66.99    4.80
  -6  -7   0   74.99    5.30
  -6  -7   0   77.19    4.90
  -6  -7   0   63.09    5.10
  -6  -7   0   91.09   10.90
   6  -7   0   76.49   10.10
  -6   7   0   73.19    8.80
  -6   7   0   89.69   10.70
  -6   7   0   74.39    8.90
  -6   7   0   65.69    8.40
  -7  -7   0    2.60    2.10
  -7  -7   0    3.60    2.10
  -7  -7   0    1.80    4.50
   7  -7   0    6.60    5.30
  -7  -7   0    4.50    2.20
  -7   7   0    3.20    4.10
  -7   7   0    0.50    4.20
  -7   7   0    7.00    4.50
   8  -7   0   47.50    9.00
  -8  -7   0   55.59    5.70
  -8  -7   0   56.19    5.40
  -8  -7   0   49.60    5.30
  -8  -7   0   61.09   10.70
  -8   7   0   53.69    8.90
  -8   7   0   51.39    9.40
  -8   7   0   41.00    7.70
  -9  -7   0   51.59    6.00
  -9  -7   0   75.79    7.30
   9  -7   0   61.59   10.90
  -9  -7   0   70.49    6.20
  -9   7   0   76.79   11.80
  -9   7   0   78.79   10.20
  -9   7   0   46.50    9.10
 -10  -7   0    4.10    3.10
  10  -7   0   18.10    7.70
 -10  -7   0    2.10    2.70
 -10   7   0    0.90    5.50
 -10   7   0    6.40    6.60
 -10   7   0    6.80    5.10
 -11  -7   0    1.40    3.30
 -11  -7   0    2.00    3.20
  11  -7   0    1.20    6.40
 -11   7   0    2.00    6.50
 -11   7   0    4.20    6.60
 -12  -7   0   -2.80    3.40
 -12  -7   0    3.10    3.80
  12  -7   0   -0.20    6.00
 -12   7   0   15.00    8.30
   0  -8   0  125.39    8.90
   0  -8   0  144.29    6.80
   0  -8   0  145.79    9.10
   0  -8   0  153.48    9.20
   0   8   0  150.28    9.40
   0   8   0  134.69    7.30
   0   8   0  140.89    9.30
   1  -8   0   60.59    7.00
  -1  -8   0   59.29    6.10
  -1  -8   0   53.69    6.70
  -1  -8   0   56.39    5.80
  -1  -8   0   54.19    4.70
  -1  -8   0   46.60    5.60
   1  -8   0   54.09    6.20
   1  -8   0   46.70    6.50
  -1   8   0   62.49    5.90
  -1   8   0   48.00    6.50
   1   8   0   54.79    6.10
   1   8   0   61.09    6.30
  -1   8   0   50.49    6.50
   1   8   0   52.19    3.80
   2  -8   0   13.30    4.20
  -2  -8   0    8.10    2.50
  -2  -8   0    7.40    3.00
   2  -8   0   -0.70    2.70
  -2  -8   0    8.30    2.60
  -2  -8   0    9.80    2.40
  -2  -8   0   12.60    2.70
   2   8   0    9.80    3.00
  -2   8   0    8.10    3.70
  -2   8   0    7.70    3.40
  -2   8   0    9.60    3.90
   2   8   0    8.20    1.80
   2   8   0    8.20    2.70
  -3  -8   0   67.89    6.70
   3  -8   0   87.69    9.00
  -3  -8   0   80.79    7.00
  -3  -8   0   65.19    5.70
  -3  -8   0   70.79    5.30
  -3  -8   0   72.39    6.50
   3  -8   0   83.79    9.80
   3   8   0   67.89    5.30
  -3   8   0   74.19    8.10
   3   8   0   71.29    4.50
  -3   8   0   73.19    8.90
  -3   8   0   66.89    8.20
   3   8   0   66.39    6.10
  -4  -8   0  125.89    7.40
  -4  -8   0  123.29    7.70
  -4  -8   0  106.99    6.70
   4  -8   0  101.69   11.00
  -4  -8   0  129.19    6.90
  -4   8   0  127.89    8.20
   4   8   0  135.19    7.00
  -4   8   0  130.69   11.90
   4   8   0  118.89    7.20
  -4   8   0  134.39   10.30
  -4   8   0  117.29   11.40
  -5  -8   0   29.60    6.40
   5  -8   0   13.80    5.80
  -5  -8   0   14.80    2.80
  -5  -8   0   16.80    3.30
  -5  -8   0   21.40    3.40
  -5  -8   0   14.70    2.80
  -5   8   0    8.10    4.50
  -5   8   0   12.70    4.40
  -5   8   0   16.70    4.50
  -5   8   0    9.30    4.50
   5   8   0   17.60    3.30
  -6  -8   0   33.40    3.80
  -6  -8   0   24.70    3.50
  -6  -8   0   27.20    3.80
  -6  -8   0   25.40    6.60
   6  -8   0   36.20    8.00
  -6   8   0   36.00    7.40
  -6   8   0   19.30    5.50
  -6   8   0   14.90    5.20
  -7  -8   0   39.20    8.60
  -7  -8   0   28.60    3.90
   7  -8   0   39.20    8.70
  -7  -8   0   29.20    3.90
  -7  -8   0   24.60    3.60
  -7   8   0   21.50    6.00
  -7   8   0   20.50    6.20
  -7   8   0   38.20    8.10
  -8  -8   0    1.60    2.10
  -8  -8   0    0.70    2.10
   8  -8   0   -3.20    4.50
  -8  -8   0   -0.40    1.80
  -8  -8   0   -0.60    4.50
  -8   8   0    0.00    4.70
  -8   8   0    1.20    4.60
  -8   8   0   -0.10    4.00
  -9  -8   0    6.90    2.60
  -9  -8   0    8.40    3.30
  -9  -8   0    8.10    3.50
   9  -8   0    2.70    5.60
  -9   8   0    5.80    5.30
  -9   8   0   10.00    6.50
  -9   8   0    7.50    6.00
 -10  -8   0    4.60    3.10
 -10  -8   0    6.20    3.10
  10  -8   0   -0.80    5.70
 -10   8   0   -0.50    5.50
 -10   8   0   -0.80    5.60
 -10   8   0    7.00    5.50
 -11  -8   0   -1.40    2.80
  11  -8   0   10.70    7.20
 -11  -8   0   -0.80    2.90
 -11   8   0    2.90    6.80
 -11   8   0    0.00    6.10
  12  -8   0   21.80    9.90
 -12  -8   0   19.70    5.80
 -12  -8   0   26.00    6.60
 -12   8   0   30.90   10.50
   0  -9   0   -1.50    2.50
   0  -9   0   -1.60    2.50
   0  -9   0    0.50    2.00
   0  -9   0    1.10    3.10
   0  -9   0    0.70    1.40
   0   9   0   -1.30    2.50
   0   9   0   -1.40    2.40
   0   9   0    2.50    2.00
  -1  -9   0   90.29    7.00
  -1  -9   0   77.49    8.20
  -1  -9   0   80.59    7.70
   1  -9   0  104.49    9.80
   1  -9   0   95.49    9.10
   1  -9   0   77.59    8.80
  -1  -9   0   84.09    7.60
  -1  -9   0   82.99    5.30
  -1   9   0   88.39    9.10
  -1   9   0   87.59    8.90
  -1   9   0   93.19    6.80
   1   9   0   89.79    8.20
   1   9   0   92.79    8.60
   1   9   0   90.99    5.30
  -2  -9   0  724.73   26.50
   2  -9   0  696.83   30.40
  -2  -9   0  716.63   25.70
  -2  -9   0  673.43   28.50
  -2  -9   0  737.73   27.60
  -2  -9   0  742.53   27.90
   2  -9   0  692.13   29.40
  -2   9   0  761.82   30.20
   2   9   0  695.33   24.30
  -2   9   0  713.53   30.50
   2   9   0  730.03   27.90
   2   9   0  715.93   27.80
  -2   9   0  734.93   28.00
   3  -9   0   96.69   10.60
  -3  -9   0  113.59    8.10
  -3  -9   0  107.29    7.30
  -3  -9   0  125.49    7.50
  -3  -9   0  101.29    7.10
   3  -9   0  109.99   10.10
   3   9   0  108.79    5.60
   3   9   0  107.99    7.20
  -3   9   0  112.09   10.90
   3   9   0  113.49    7.50
  -3   9   0  117.09   11.40
  -4  -9   0   26.10    3.90
  -4  -9   0   32.70    4.80
  -4  -9   0   25.00    4.10
  -4  -9   0   20.10    3.60
   4  -9   0   27.40    6.70
  -4   9   0   23.20    5.80
   4   9   0   29.10    4.20
  -4   9   0   30.50    6.30
  -4   9   0   24.90    4.40
   4   9   0   24.40    3.50
  -5  -9   0  522.25   19.40
  -5  -9   0  491.45   24.90
  -5  -9   0  469.25   19.30
  -5  -9   0  495.65   20.20
   5  -9   0  479.75   25.30
  -5   9   0  506.65   25.40
  -5   9   0  432.46   23.40
  -5   9   0  542.85   21.60
   5   9   0  475.05   19.60
  -6  -9   0  683.33   24.90
   6  -9   0  710.23   33.00
  -6  -9   0  701.03   31.60
  -6  -9   0  666.53   25.60
  -6  -9   0  636.94   24.90
  -6   9   0  648.84   31.80
  -6   9   0  692.03   28.20
  -6   9   0  640.64   30.40
  -7  -9   0    5.00    5.40
  -7  -9   0    0.20    1.80
  -7  -9   0    3.20    2.30
  -7  -9   0   -2.80    1.70
   7  -9   0   -2.90    5.20
  -7   9   0   -2.00    3.70
  -7   9   0    0.10    4.80
  -7   9   0    0.30    4.00
  -8  -9   0  303.07   14.20
  -8  -9   0  326.07   13.70
  -8  -9   0  299.17   14.20
  -8  -9   0  271.27   19.80
   8  -9   0  320.57   21.70
  -8   9   0  294.67   19.10
  -8   9   0  327.67   18.90
  -8   9   0  332.07   21.70
   9  -9   0  201.48   20.30
  -9  -9   0  193.18   11.00
  -9  -9   0  194.18   11.30
  -9  -9   0  210.88   20.70
  -9   9   0  217.68   18.70
  -9   9   0  201.48   19.80
  -9   9   0  212.18   16.30
  10  -9   0   13.10    7.90
 -10  -9   0    2.00    2.90
 -10  -9   0   10.80    3.70
 -10   9   0   15.70    6.80
 -10   9   0   -4.60    5.50
 -10   9   0    7.00    5.70
  11  -9   0   -0.80    7.10
 -11  -9   0    3.50    3.40
 -11  -9   0    3.20    3.40
 -11   9   0    6.40    5.90
 -11   9   0   13.70    7.60
 -11   9   0   12.80    7.80
 -12  -9   0   94.99   10.20
 -12  -9   0   96.49   10.40
  12  -9   0  127.19   18.80
 -12   9   0  128.09   18.40
   0 -10   0   78.79    5.00
   0 -10   0   72.89    7.80
   0 -10   0   78.79    8.40
   0 -10   0   67.09    7.50
   0 -10   0   63.59    8.20
   0  10   0  101.89    9.80
   0  10   0   86.69    9.10
   0  10   0   83.99    5.80
  -1 -10   0   42.10    6.10
   1 -10   0   56.39    7.50
   1 -10   0   47.70    7.10
  -1 -10   0   54.19    7.20
   1 -10   0   40.40    6.40
  -1 -10   0   41.50    5.80
  -1 -10   0   51.49    4.80
  -1 -10   0   48.10    6.20
   1  10   0   57.49    4.80
   1  10   0   51.29    6.60
  -1  10   0   53.59    7.50
  -1  10   0   37.30    6.40
  -1  10   0   61.79    6.50
   1  10   0   46.00    6.30
  -2 -10   0   62.79    6.20
  -2 -10   0   68.69    7.70
  -2 -10   0   52.89    6.50
   2 -10   0   56.49    7.50
  -2 -10   0   58.99    6.60
  -2 -10   0   70.39    6.10
   2 -10   0   48.30    7.50
   2  10   0   68.49    7.50
  -2  10   0   70.99    7.80
   2  10   0   67.49    4.10
  -2  10   0   62.59    8.40
   2  10   0   67.59    7.10
  -2  10   0   80.19    9.50
  -3 -10   0   85.09    7.90
  -3 -10   0   90.49    7.80
   3 -10   0   71.29    9.40
  -3 -10   0  108.49    8.30
  -3 -10   0   87.69    6.70
  -3  10   0   94.69   10.80
   3  10   0   99.49    7.40
  -3  10   0   92.09    9.90
  -4 -10   0    2.00    2.80
  -4 -10   0    3.60    2.50
   4 -10   0   -2.50    3.30
  -4 -10   0   -0.20    2.00
  -4  10   0   -1.70    3.30
  -4  10   0    0.30    2.50
   4  10   0    2.70    2.50
  -4  10   0   -0.20    3.60
   5 -10   0    3.50    4.90
  -5 -10   0    3.80    2.30
  -5 -10   0    6.40    2.90
  -5 -10   0    2.30    2.40
  -5 -10   0    8.10    4.90
  -5  10   0    5.60    4.50
  -5  10   0    3.00    3.20
  -5  10   0    5.20    4.40
  -6 -10   0  168.78    9.80
  -6 -10   0  187.78   10.30
   6 -10   0  154.18   16.10
  -6 -10   0  186.58   17.50
  -6 -10   0  198.28   10.20
  -6  10   0  193.38   14.70
  -6  10   0  175.38   12.20
  -6  10   0  215.58   16.30
  -7 -10   0   31.10    4.40
  -7 -10   0   20.40    3.90
  -7 -10   0   20.50    3.80
  -7 -10   0    8.70    5.70
   7 -10   0   28.10    8.40
  -7  10   0   14.50    6.00
  -7  10   0   23.20    7.90
  -7  10   0   22.50    6.30
   8 -10   0    7.60    6.30
  -8 -10   0    1.10    2.50
  -8 -10   0    3.70    2.70
  -8 -10   0   -1.40    2.10
  -8 -10   0    6.90    5.70
  -8  10   0    5.90    5.00
  -8  10   0   -3.30    4.50
  -8  10   0    4.30    5.40
   9 -10   0    3.20    6.20
  -9 -10   0    1.60    2.70
  -9 -10   0    8.30    6.40
  -9 -10   0    6.90    3.20
  -9  10   0    7.10    6.10
  -9  10   0    2.50    5.40
  -9  10   0    3.80    6.80
  10 -10   0   10.90    7.20
 -10 -10   0    2.20    2.70
 -10 -10   0    1.20    2.90
 -10  10   0   -4.80    5.70
 -10  10   0   -7.60    5.10
 -10  10   0    4.10    6.10
  11 -10   0    8.90    7.80
 -11 -10   0   11.00    4.20
 -11 -10   0   22.70    5.10
 -11  10   0   -1.10    6.30
 -11  10   0   27.00    8.50
 -11  10   0   17.80    8.10
 -12 -10   0   -0.60    3.60
  12 -10   0    0.80    7.00
 -12 -10   0    1.50    3.90
 -12  10   0    2.40    7.80
   0 -11   0   -0.20    1.50
   0 -11   0    1.80    2.80
   0 -11   0    0.80    3.00
   0 -11   0   -3.00    2.50
   0 -11   0   -1.00    3.30
   0  11   0   -2.70    2.60
   0  11   0    2.00    3.40
   0  11   0    2.60    2.50
  -1 -11   0   12.00    2.70
  -1 -11   0   14.40    4.60
   1 -11   0    5.40    4.20
  -1 -11   0   14.40    4.20
  -1 -11   0    3.30    2.90
   1 -11   0   13.90    4.70
   1 -11   0    7.10    3.80
  -1 -11   0   11.90    4.20
   1 -11   0   14.80    4.80
   1  11   0   14.10    4.50
  -1  11   0    6.40    3.70
   1  11   0   10.70    2.70
  -1  11   0   11.00    3.40
  -1  11   0   13.50    4.50
   1  11   0    8.30    3.60
   2 -11   0   33.20    6.60
  -2 -11   0   38.20    5.80
  -2 -11   0   28.60    4.10
  -2 -11   0   44.00    6.80
  -2 -11   0   28.30    5.20
   2 -11   0   14.40    5.40
  -2 -11   0   22.50    4.20
   2  11   0   31.00    5.80
  -2  11   0   39.40    6.10
  -2  11   0   31.60    6.40
  -2  11   0   31.80    6.70
   2  11   0   25.60    4.90
  -3 -11   0  266.17   14.10
  -3 -11   0  275.47   10.80
  -3 -11   0  289.97   15.20
  -3 -11   0  251.87   12.70
  -3 -11   0  281.67   14.10
   3 -11   0  261.67   17.20
   3  11   0  258.57   14.00
  -3  11   0  276.67   16.80
  -3  11   0  274.37   17.00
  -4 -11   0   37.50    5.60
  -4 -11   0   39.50    5.30
  -4 -11   0   35.20    5.80
   4 -11   0   26.70    7.00
  -4  11   0   42.60    8.20
   4  11   0   38.10    5.90
  -4  11   0   28.40    7.40
  -4  11   0   47.80    5.90
  -5 -11   0   30.60    4.90
  -5 -11   0   29.50    7.50
  -5 -11   0   44.70    6.00
  -5 -11   0   36.50    5.30
   5 -11   0   20.90    6.70
  -5  11   0   24.10    6.70
  -5  11   0   26.20    5.50
  -5  11   0   28.90    7.60
  -6 -11   0   -1.70    2.10
   6 -11   0   -6.90    4.20
  -6 -11   0    0.20    4.50
  -6 -11   0   -0.30    2.30
  -6 -11   0   -1.00    2.20
  -6  11   0    1.20    4.30
  -6  11   0   -5.60    3.80
  -6  11   0   -1.20    3.70
  -7 -11   0    4.30    2.80
  -7 -11   0   -1.70    2.20
  -7 -11   0    0.60    5.00
   7 -11   0    3.10    5.70
  -7 -11   0    2.20    2.50
  -7  11   0    1.00    4.70
  -7  11   0    0.20    4.20
  -7  11   0   -2.00    5.10
   8 -11   0   50.79   11.30
  -8 -11   0   69.49    7.20
  -8 -11   0   57.69    6.90
  -8 -11   0   52.99   11.20
  -8  11   0   74.29   12.80
  -8  11   0   81.99   11.10
  -8  11   0   60.69   10.80
   9 -11   0   28.90   10.10
  -9 -11   0   29.80    5.40
  -9 -11   0   22.60    8.60
  -9 -11   0   18.60    4.70
  -9  11   0   29.20    8.70
  -9  11   0   35.30   10.20
 -10 -11   0   33.60    5.80
 -10 -11   0   48.00    6.60
  10 -11   0   40.00   11.10
 -10  11   0   54.09   12.70
 -10  11   0   49.00   10.60
  11 -11   0    6.60    7.30
 -11 -11   0   -0.10    3.20
 -11 -11   0   -1.60    2.90
 -11  11   0   12.60    7.90
 -11  11   0   -0.90    6.30
   0 -12   0  655.43   29.00
   0 -12   0  690.43   29.60
   0 -12   0  663.03   23.90
   0 -12   0  710.13   29.70
   0 -12   0  657.23   30.70
   0  12   0  707.03   30.20
   0  12   0  662.13   29.70
   0  12   0  696.53   25.80
  -1 -12   0   63.19    8.40
  -1 -12   0   67.39    7.90
  -1 -12   0   60.19    7.90
   1 -12   0   63.39    9.20
   1 -12   0   72.39   10.20
  -1 -12   0   51.79    8.10
   1 -12   0   60.29    8.70
  -1 -12   0   57.59    5.40
  -1  12   0   66.39    9.40
  -1  12   0   72.79    7.70
   1  12   0   49.30    7.30
   1  12   0   53.19    7.80
  -1  12   0   44.80    7.50
  -2 -12   0   49.30    6.20
   2 -12   0   46.80    8.90
  -2 -12   0   41.80    5.00
  -2 -12   0   53.89    7.70
  -2 -12   0   53.69    7.10
  -2 -12   0   37.90    6.30
   2  12   0   47.00    7.20
  -2  12   0   42.40    7.90
  -2  12   0   33.70    7.20
  -3 -12   0  147.99   10.40
  -3 -12   0  134.29    8.70
  -3 -12   0  148.79   10.30
  -3 -12   0  162.98   11.30
   3 -12   0  129.19   14.20
   3  12   0  138.79   10.30
  -3  12   0  171.58   13.30
  -3  12   0  117.49   13.20
   4 -12   0  135.19   15.40
  -4 -12   0  142.89   10.40
  -4 -12   0  134.99    9.50
  -4 -12   0  125.89    9.50
   4  12   0  124.29    9.60
  -4  12   0  103.29   12.10
  -4  12   0  111.59   12.80
   5 -12   0    7.90    5.90
  -5 -12   0   10.20    3.90
  -5 -12   0    6.10    3.10
  -5 -12   0   10.70    3.90
  -5  12   0    2.90    4.90
  -5  12   0    5.30    4.80
  -6 -12   0   45.80    6.20
  -6 -12   0   49.90   10.50
  -6 -12   0   46.40    6.40
   6 -12   0   37.20    9.50
  -6 -12   0   52.99    6.80
  -6  12   0   45.10    9.50
  -6  12   0   83.49   13.10
  -7 -12   0   39.20    5.70
  -7 -12   0   43.40    9.80
   7 -12   0   33.10   10.00
  -7 -12   0   52.09    6.00
  -7 -12   0   42.40    6.10
  -7  12   0   49.40   10.20
  -7  12   0   49.00   10.30
  -8 -12   0   61.49   12.20
  -8 -12   0   67.39    7.50
   8 -12   0   90.59   15.00
  -8 -12   0   69.79    7.90
  -8  12   0   67.89   12.70
  -8  12   0   71.59   12.10
  -9 -12   0    7.50    3.70
  -9 -12   0   12.90    4.20
  -9 -12   0   20.30    8.40
   9 -12   0    6.20    7.40
  -9  12   0   13.50    7.80
  -9  12   0    9.70    7.20
 -10 -12   0   51.49   12.90
  10 -12   0   37.20   12.40
 -10 -12   0   42.20    6.80
 -10 -12   0   37.10    6.30
 -10  12   0   67.09   12.40
 -10  12   0   42.20   11.30
 -11 -12   0   40.80    7.00
  11 -12   0   35.50   11.70
 -11 -12   0   55.99    7.80
 -11  12   0   59.09   12.10
 -11  12   0   33.10   11.20
   0 -13   0    0.50    4.10
   0 -13   0    0.70    3.30
   0 -13   0    2.80    3.70
   0  13   0   -3.20    3.00
   0  13   0    3.70    3.60
  -1 -13   0   53.59    8.30
  -1 -13   0   53.89    8.70
   1 -13   0   66.59    9.40
   1 -13   0   44.80    8.40
   1 -13   0   42.70    8.20
  -1 -13   0   59.39    8.30
  -1 -13   0   51.19    7.30
  -1  13   0   63.39    9.70
   1  13   0   41.80    7.50
  -1  13   0   68.19    9.80
  -2 -13   0   76.79    8.00
   2 -13   0   86.19   11.80
  -2 -13   0   70.49    9.50
  -2 -13   0   75.39    9.00
   2 -13   0   83.09   11.80
  -2 -13   0   75.99    8.90
  -2  13   0   64.79    9.40
  -2  13   0   72.09   10.10
   2  13   0   59.49    8.40
  -3 -13   0    8.10    4.20
   3 -13   0    2.50    4.90
  -3 -13   0    8.30    4.30
  -3 -13   0   15.60    4.60
  -3  13   0   12.40    5.30
  -3  13   0    9.00    5.20
   3  13   0    8.70    4.60
  -4 -13   0   16.20    5.10
  -4 -13   0    5.60    3.80
  -4 -13   0    3.80    3.60
   4 -13   0    8.00    5.40
  -4  13   0   19.80    6.90
  -4  13   0    0.80    4.60
  -5 -13   0   38.80    6.50
  -5 -13   0   23.20    5.10
   5 -13   0   37.80    9.20
  -5 -13   0   23.90    5.20
  -5  13   0   20.20    6.90
  -5  13   0   20.80    7.70
  -6 -13   0   -1.90    3.20
  -6 -13   0   -4.00    2.60
   6 -13   0    5.80    6.30
  -6 -13   0    3.00    5.80
  -6 -13   0    3.60    3.40
  -6  13   0   -2.10    4.70
  -6  13   0    3.10    5.40
  -7 -13   0   -1.20    3.00
  -7 -13   0    7.40    6.30
  -7 -13   0    1.40    2.90
  -7 -13   0   -0.20    3.00
   7 -13   0   -3.60    5.40
  -7  13   0    4.10    5.80
  -7  13   0   -3.80    5.50
   8 -13   0   22.90    9.80
  -8 -13   0    7.50    3.80
  -8 -13   0   13.10    4.40
  -8 -13   0   26.20    9.00
  -8  13   0    9.20    7.40
  -8  13   0   -3.00    6.60
  -9 -13   0   35.50   11.00
   9 -13   0   35.60   11.60
  -9 -13   0   25.00    5.70
  -9 -13   0   28.40    6.00
  -9  13   0   36.70   10.80
  -9  13   0   30.80    9.90
 -10 -13   0    0.50    3.30
 -10 -13   0   -1.10    6.50
 -10 -13   0    3.00    3.60
  10 -13   0    5.30    8.20
 -10  13   0  -11.60    6.80
 -10  13   0    3.40    7.70
   0 -14   0   -1.90    3.30
   0 -14   0    3.30    4.10
   0 -14   0    1.60    4.20
   0  14   0    6.20    4.50
  -1 -14   0    6.20    5.00
   1 -14   0   10.10    6.00
   1 -14   0    3.30    4.00
  -1 -14   0   13.00    4.20
  -1 -14   0   14.50    5.00
   1  14   0    6.10    4.90
  -1  14   0    7.90    5.10
  -1  14   0   24.80    6.80
  -2 -14   0    1.10    3.10
   2 -14   0    3.70    5.00
   2 -14   0   -1.60    5.40
  -2 -14   0   -3.50    3.90
  -2 -14   0    2.00    3.80
  -2  14   0    1.90    4.20
   2  14   0    1.80    4.00
  -2  14   0   11.80    5.70
   3 -14   0   64.29   11.20
  -3 -14   0   73.19    9.30
  -3 -14   0   57.69    8.70
  -3 -14   0   45.50    7.20
   3 -14   0   53.99   10.00
   3  14   0   56.59    8.40
  -3  14   0   39.30    8.90
  -3  14   0   50.89    9.20
  -4 -14   0   12.60    5.40
  -4 -14   0    9.20    4.10
  -4 -14   0    0.00    3.00
   4 -14   0   -1.00    5.30
   4 -14   0   11.40    6.40
  -4  14   0   -2.70    4.60
  -4  14   0   -2.80    4.30
   5 -14   0   45.30   10.10
  -5 -14   0   37.20    6.80
  -5 -14   0   38.60    7.10
  -5 -14   0   36.70    6.60
  -5  14   0   45.30   10.00
  -5  14   0   35.70    9.10
   6 -14   0    0.40    5.80
  -6 -14   0   -1.60    2.70
  -6 -14   0    2.30    3.40
  -6 -14   0    4.00    6.50
  -6 -14   0   -0.60    3.60
  -6  14   0    9.00    6.10
  -6  14   0    2.00    6.10
   7 -14   0    3.10    5.90
  -7 -14   0    2.20    3.40
   7 -14   0    6.50    6.30
  -7 -14   0    3.20    3.70
  -7 -14   0    0.30    5.40
  -7 -14   0   -3.40    2.80
  -7  14   0    8.60    6.30
  -7  14   0   10.80    7.40
   8 -14   0    3.20    7.60
  -8 -14   0   24.30    5.80
  -8 -14   0   16.50    5.30
   8 -14   0   12.10    8.30
  -8 -14   0   33.00   10.10
  -8  14   0   14.70    8.80
  -8  14   0    9.30    7.90
   9 -14   0    1.20    7.50
  -9 -14   0    3.90    3.50
  -9 -14   0    4.60    4.00
  -9 -14   0   -7.90    6.80
  -9  14   0    1.40    7.40
  -9  14   0    4.00    7.30
 -10 -14   0    3.30    3.50
 -10 -14   0    2.30    3.60
 -10 -14   0    1.40    7.40
  10 -14   0    5.40    8.80
 -10  14   0   -2.90    7.40
 -10  14   0   -9.10    6.80
   0 -15   0   -2.00    4.30
   0 -15   0   -2.50    4.10
   0 -15   0    1.10    4.60
   0  15   0   -4.30    4.20
   1 -15   0   98.19   13.50
  -1 -15   0  130.49   14.20
  -1 -15   0  126.29   13.60
   1 -15   0  119.09   13.50
  -1 -15   0  124.39   11.90
  -1  15   0  115.29   13.70
   1  15   0  142.99   14.40
  -2 -15   0  130.89   14.20
  -2 -15   0  126.39   12.50
   2 -15   0  108.69   14.20
   2 -15   0  140.39   15.30
  -2  15   0  147.59   15.70
   2  15   0  120.99   13.10
  -2  15   0  139.29   15.10
   3 -15   0    5.50    6.90
  -3 -15   0    4.70    4.50
  -3 -15   0   10.50    5.30
   3 -15   0   -1.90    5.70
   3  15   0   20.50    6.40
  -3  15   0   24.60    7.70
  -3  15   0    9.30    5.70
   4 -15   0   14.20    7.00
  -4 -15   0    4.70    4.20
   4 -15   0    7.60    6.80
  -4 -15   0   19.70    5.70
  -4 -15   0   10.60    5.60
  -4  15   0   -3.40    4.50
  -4  15   0   12.60    6.10
  -5 -15   0   64.39    9.20
   5 -15   0   47.70   10.90
  -5 -15   0   68.49    9.00
  -5 -15   0   65.79    9.10
   5 -15   0   78.89   13.90
  -5  15   0   64.99   11.60
  -5  15   0   50.89   10.10
  -6 -15   0   69.09    9.10
  -6 -15   0   75.79    9.10
   6 -15   0   61.79   12.00
   6 -15   0   48.00   11.70
  -6 -15   0   66.69   12.20
  -6 -15   0   54.69    8.40
  -6  15   0   42.40   11.20
  -6  15   0   55.89   11.90
  -7 -15   0   -6.30    4.80
  -7 -15   0   -3.90    3.20
   7 -15   0   -9.60    5.90
  -7 -15   0   -1.80    3.20
   7 -15   0   -5.70    6.70
  -7 -15   0   -4.00    3.60
  -7  15   0    7.40    7.00
  -7  15   0   -0.90    6.10
  -8 -15   0   22.10    6.10
  -8 -15   0    9.50    8.30
   8 -15   0    9.40    9.40
  -8 -15   0   15.30    5.50
   8 -15   0   17.60    9.50
  -8  15   0    4.50    7.40
  -8  15   0   17.10    8.50
   9 -15   0    3.70    8.40
  -9 -15   0   37.10    7.00
  -9 -15   0   30.00    7.20
  -9 -15   0   43.20   11.80
  -9  15   0   31.90   11.20
  -9  15   0   45.70   12.30
   0 -16   0   63.19   10.00
   0 -16   0   71.29   11.60
   0  16   0   64.19   10.70
   1 -16   0   36.90    9.60
  -1 -16   0   30.80    6.60
  -1 -16   0   42.20    8.40
  -1 -16   0   23.90    7.70
   1 -16   0   22.60    6.80
  -1  16   0   33.60    8.50
   1  16   0   48.00    8.80
  -2 -16   0   74.69   11.40
   2 -16   0   96.29   14.00
  -2 -16   0  106.39   12.40
   2 -16   0   83.39   12.50
   2  16   0   95.19   11.80
  -2  16   0   69.49   11.30
  -3 -16   0    4.60    5.00
  -3 -16   0    3.50    4.00
   3 -16   0    2.80    6.60
   3 -16   0   -1.20    5.70
  -3  16   0    9.80    6.50
  -3  16   0    8.40    5.40
  -4 -16   0   -3.30    4.10
   4 -16   0   -1.00    6.20
   4 -16   0    4.30    5.90
  -4 -16   0   -2.00    3.80
  -4  16   0    0.00    5.20
  -4  16   0   -4.70    5.20
   5 -16   0   -1.10    6.90
   5 -16   0   -4.70    5.90
  -5 -16   0    1.20    4.40
  -5 -16   0    0.30    4.20
  -5  16   0    3.00    6.00
  -5  16   0    2.80    5.50
   6 -16   0   49.00   12.70
   6 -16   0   39.60   10.80
  -6 -16   0   27.30    6.50
  -6 -16   0   27.80    6.90
  -6 -16   0   20.50    8.70
  -6  16   0   36.00   10.00
  -6  16   0   27.70    9.20
   7 -16   0   42.00   11.30
  -7 -16   0    2.20    4.10
  -7 -16   0   30.10    6.60
   7 -16   0   24.10   10.30
  -7 -16   0   22.50    9.60
  -7  16   0   36.30   10.80
  -7  16   0   28.60    9.50
  -8 -16   0   20.00    9.50
   8 -16   0   15.50   10.30
  -8 -16   0   -1.40    4.30
   8 -16   0    0.10    6.80
  -8 -16   0    9.70    4.80
  -8  16   0    3.30    7.90
  -8  16   0    4.00    8.20
   9 -16   0    7.50    8.50
  -9 -16   0   -4.40    3.90
  -9 -16   0    2.00    4.40
  -9 -16   0   10.50    8.70
  -9  16   0    4.40    8.80
  -9  16   0   -3.60    7.40
   0 -17   0   -8.00    4.30
   0 -17   0   -1.20    4.00
   0  17   0   -3.80    4.00
   1 -17   0    7.70    6.30
  -1 -17   0    4.60    5.50
   1 -17   0   -1.10    5.80
   1  17   0   12.90    6.40
  -1  17   0   20.20    7.20
  -2 -17   0   13.90    6.70
  -2 -17   0    1.20    5.20
   2 -17   0   13.50    7.90
   2 -17   0   10.70    6.90
  -2  17   0    0.10    5.90
   2  17   0    2.90    4.70
   3 -17   0    3.90    6.60
   3 -17   0   -2.30    6.30
  -3 -17   0   -8.20    4.90
  -3 -17   0   11.10    5.90
  -3  17   0   -7.80    4.70
  -4 -17   0    2.20    5.10
  -4 -17   0   10.00    5.30
   4 -17   0   -5.30    6.50
   4 -17   0    5.90    7.00
  -4  17   0    2.40    5.40
  -4  17   0   -6.50    4.40
  -5 -17   0    4.70    4.80
  -5 -17   0    2.50    4.30
   5 -17   0   -0.30    7.50
   5 -17   0    7.80    7.50
  -5  17   0    9.30    6.50
  -5  17   0   -1.80    6.40
  -6 -17   0    3.20    4.90
  -6 -17   0    1.90    7.00
   6 -17   0   11.80    8.70
  -6 -17   0    9.50    4.70
   6 -17   0    5.10    8.10
  -6  17   0    4.80    7.50
  -6  17   0    2.00    6.50
   7 -17   0   13.60   10.30
   7 -17   0   19.10   10.40
  -7 -17   0   -1.60    4.30
  -7 -17   0    6.10    8.10
  -7  17   0    1.70    7.40
  -7  17   0    3.30    7.60
  -8 -17   0    3.20    4.90
   8 -17   0    0.50    8.60
   8 -17   0    9.10    9.10
  -8 -17   0    0.10    7.30
  -8  17   0    6.20    8.20
  -8  17   0   12.00    9.50
   0 -18   0  125.99   16.30
   0 -18   0  160.48   15.60
   0  18   0  124.49   15.50
  -1 -18   0   60.99   11.60
   1 -18   0   48.50   11.70
   1 -18   0   50.59   10.20
  -1  18   0   66.19   12.10
   1  18   0   55.99   10.60
   2 -18   0    6.70    6.30
  -2 -18   0   11.10    7.00
   2 -18   0    9.70    8.20
   2  18   0    6.70    5.50
  -2  18   0   10.40    7.30
  -3 -18   0  191.18   19.10
   3 -18   0  202.98   20.90
  -3 -18   0  224.48   17.40
  -3  18   0  215.38   22.70
   4 -18   0  125.89   17.80
  -4 -18   0  186.68   17.80
   4 -18   0  130.89   17.60
  -4 -18   0  172.38   17.10
  -4  18   0  140.69   17.90
  -5 -18   0    6.10    6.00
  -5 -18   0    4.80    5.00
   5 -18   0   10.20    9.40
   5 -18   0   -1.20    7.50
  -5  18   0    9.10    7.90
   6 -18   0   13.00    9.00
  -6 -18   0   18.50    7.20
  -6 -18   0   17.50    6.20
   6 -18   0   20.40   10.90
  -6 -18   0   14.30    8.40
  -6  18   0   11.10    9.10
  -6  18   0    8.60    8.40
  -7 -18   0   49.80    9.50
   7 -18   0   40.50   13.10
   7 -18   0   26.70   12.50
  -7 -18   0   22.30   10.20
  -7  18   0   56.49   13.80
  -7  18   0   24.40   11.60
   0 -19   0   14.40    7.90
   0  19   0    8.10    6.80
  -1 -19   0   -2.00    6.20
   1 -19   0   16.60    8.30
   1 -19   0    5.70    6.20
  -1  19   0    9.50    7.80
   1  19   0    1.90    5.90
   2 -19   0    0.90    6.90
  -2 -19   0    5.70    6.90
   2 -19   0   -4.10    6.20
  -2  19   0    1.00    5.90
   3 -19   0   10.80    9.20
   3 -19   0   -5.80    6.30
  -3 -19   0    0.10    6.20
  -3  19   0   -4.40    6.20
   4 -19   0   -9.60    7.40
   4 -19   0    7.40    8.50
  -4 -19   0   -7.50    4.50
  -4 -19   0  -10.60    5.10
  -4  19   0    1.90    6.80
   5 -19   0   28.30   11.10
  -5 -19   0   12.50    6.30
   5 -19   0    0.10    8.70
  -5 -19   0   21.10    8.20
  -5  19   0   13.60    8.80
   6 -19   0    8.20    9.80
  -6 -19   0   15.80    6.60
   6 -19   0   -6.10    8.50
  -6 -19   0   29.20   10.40
  -6 -19   0    5.60    6.10
  -6  19   0    6.90    8.70
   0 -20   0   19.80    9.60
   0  20   0   -7.90    5.50
   1 -20   0    9.00    8.30
  -1 -20   0   12.30    7.70
   1  20   0   12.80    7.40
  -1  20   0    2.30    6.90
   2 -20   0    9.80    8.90
   2 -20   0    6.90    7.10
  -2 -20   0    0.80    6.20
  -2  20   0   -5.00    6.30
  -3 -20   0   23.60    8.90
   3 -20   0   26.00   11.20
   3 -20   0   29.60   10.30
  -3  20   0   28.30   10.60
   4 -20   0   10.60   10.10
  -4 -20   0   22.50    9.10
   4 -20   0   38.60   12.10
  -4  20   0   16.90    9.30
  -5 -20   0   -1.50    5.30
  -5 -20   0   -0.90    6.10
   5 -20   0   -1.60    9.50
   5 -20   0    9.20   10.00
  -5  20   0   -2.30    6.60
   0 -21   0    7.60    8.80
   0  21   0   -3.10    6.20
   1 -21   0    0.00    7.90
  -1 -21   0    7.80    7.90
   1  21   0   12.80    8.20
  -1  21   0   12.10    7.70
   2 -21   0   92.39   17.00
   2 -21   0   79.99   13.80
  -2 -21   0   72.89   14.30
  -2  21   0   69.59   13.20
   3 -21   0   34.40   12.80
  -3 -21   0   20.70    9.70
   3 -21   0   12.70   10.40
  -3  21   0   31.10   11.20
 -13   0   1    5.40    4.40
 -13   0   1    3.00    5.60
 -12   0   1    2.00    5.00
 -12   0   1    1.40    4.20
 -11   0   1    1.00    4.00
 -11   0   1   -1.00    3.80
 -10   0   1    3.30    3.60
 -10   0   1   -4.40    3.10
 -10   0   1   -2.10    2.80
  -9   0   1   -3.20    2.60
  -9   0   1   -3.10    2.40
  -9   0   1   -2.20    2.90
  -8   0   1    1.90    2.50
  -8   0   1   -2.00    2.60
  -8   0   1   -1.30    2.70
   8   0  -1    0.40    3.00
  -7   0   1   -1.40    2.10
  -7   0   1   -1.30    1.70
  -7   0   1    0.10    2.40
   7   0  -1    1.40    2.50
  -6   0   1   -1.70    1.40
  -6   0   1   -0.60    3.20
  -6   0   1   -0.90    1.00
  -6   0   1   -2.30    2.20
   6   0  -1    1.70    2.40
  -6   0   1   -2.10    1.70
  -5   0   1   -1.10    1.00
  -5   0   1    0.00    1.60
  -5   0   1    0.40    2.50
  -5   0   1    0.90    1.50
  -5   0   1    1.60    2.10
  -5   0   1    1.20    2.00
   5   0  -1   -1.50    1.90
  -4   0   1    4.00    3.00
  -4   0   1   -0.60    1.20
  -4   0   1    0.50    1.80
  -4   0   1   -0.70    1.80
  -4   0   1    0.10    1.30
   4   0  -1    1.90    2.00
  -4   0   1    0.10    1.40
   3   0  -1   -2.80    1.50
  -3   0   1    0.00    1.80
  -3   0   1    0.10    2.40
  -3   0   1   -1.90    1.10
  -3   0   1   -1.00    1.10
  -3   0   1   -1.50    1.60
  -3   0   1   -1.30    1.10
  -2   0   1   -0.10    0.80
  -2   0   1    0.60    0.80
   2   0  -1    1.50    1.20
  -2   0   1    0.20    0.80
  -2   0   1   -1.50    1.30
  -2   0   1    0.50    0.90
   2   0  -1   -1.40    0.70
  -1   0   1   -0.30    0.70
   1   0  -1   -0.40    0.60
   1   0  -1    0.40    0.70
  -1   0   1   -0.50    0.50
  -1   0   1    0.60    0.50
  -1   0   1    0.70    0.60
   1   0  -1   -1.40    0.60
  -1   0   1   -0.30    0.90
  -1   0   1   -0.40    0.80
   0   0   1   -0.30    0.60
   0   0   1   -0.90    0.50
   0   0   1   -1.60    0.60
   0   0  -1   -1.10    0.40
   0   0  -1   -0.70    0.50
   0   0   1   -1.40    0.60
  -1   0  -1    0.30    1.10
   1   0   1   -1.00    1.00
  -1   0  -1    0.50    1.30
  -1   0  -1    0.50    0.90
  -1   0  -1    1.00    1.10
   1   0   1   -0.40    1.00
  -1   0  -1    0.80    0.80
   1   0   1    0.00    0.80
  -1   0  -1    0.70    1.10
   2   0   1    2.10    1.80
  -2   0  -1    0.90    2.00
  -2   0  -1    1.30    2.20
   2   0   1    0.60    1.60
  -2   0  -1    0.40    1.20
  -2   0  -1   -2.10    1.40
  -2   0  -1   -1.90    1.20
  -2   0  -1    1.20    2.00
  -2   0  -1   -2.30    1.50
   2   0   1    0.20    1.10
  -3   0  -1    0.50    2.10
   3   0   1   -2.50    1.80
   3   0   1   -1.40    1.10
  -3   0  -1   -0.10    1.50
  -3   0  -1    0.10    1.50
   3   0   1    0.10    2.00
  -3   0  -1    0.90    1.60
  -3   0  -1    2.00    2.00
  -3   0  -1   -0.40    2.30
   4   0   1    0.00    2.10
  -4   0  -1   -1.20    2.30
  -4   0  -1    0.50    1.60
  -4   0  -1   -1.60    1.60
  -4   0  -1    0.20    2.10
   4   0   1   -0.40    2.20
  -4   0  -1   -3.60    1.40
  -5   0  -1   -1.50    2.20
  -5   0  -1   -0.40    1.60
  -5   0  -1   -5.30    2.30
  -5   0  -1   -1.80    1.70
  -5   0  -1   -3.10    1.40
   5   0   1    1.10    2.40
   5   0   1    0.40    2.50
  -6   0  -1   -5.60    2.70
  -6   0  -1   -1.20    1.90
  -6   0  -1   -0.90    1.60
   6   0   1    4.30    2.60
   6   0   1    1.20    2.60
  -6   0  -1    1.70    2.80
  -6   0  -1   -2.20    1.70
   7   0   1    3.20    3.00
  -7   0  -1    0.40    3.50
  -7   0  -1    0.30    2.30
   7   0   1   -2.80    2.70
  -7   0  -1   -3.30    1.60
  -7   0  -1   -0.90    1.60
  -7   0  -1   -1.70    2.60
  -8   0  -1    1.50    1.90
  -8   0  -1   -5.90    2.70
  -8   0  -1    1.20    2.50
  -8   0  -1    1.60    2.90
  -8   0  -1   -0.40    4.30
   8   0   1    3.40    3.50
  -9   0  -1    5.50    4.00
  -9   0  -1   -9.20    3.80
  -9   0  -1    1.00    3.00
  -9   0  -1   -1.20    2.80
   9   0   1    1.80    4.20
 -10   0  -1   -1.80    3.40
 -10   0  -1    0.40    4.70
 -10   0  -1   -2.80    4.10
 -11   0  -1    0.20    4.10
 -11   0  -1   -1.30    4.30
 -12   0  -1    6.30    5.10
 -12   0  -1   -3.50    4.80
 -13   0  -1   -1.50    5.30
 -13   0  -1   -6.90    5.20
 -13  -1   1   -1.00    4.60
 -13  -1   1    3.30    5.30
 -13   1   1    9.20    6.20
 -13   1   1   -2.40    4.90
 -12  -1   1   -2.30    4.60
 -12  -1   1   -0.10    4.90
 -12   1   1   -1.10    4.10
 -12   1   1   -5.10    4.50
 -11  -1   1   36.70    7.00
 -11  -1   1   46.70    8.10
 -11  -1   1   34.30    6.60
 -11   1   1   67.79    9.70
 -11   1   1   40.80    8.40
 -10  -1   1   38.60    6.80
 -10  -1   1   40.30    6.70
 -10  -1   1   38.90    6.70
 -10   1   1   36.60    6.90
 -10   1   1   46.90    7.70
 -10   1   1   40.20    7.50
  -9  -1   1   -0.40    2.50
   9  -1  -1    6.20    4.00
  -9  -1   1   -0.70    2.90
  -9  -1   1   -0.20    2.90
  -9   1   1    2.90    3.00
  -9   1   1    0.00    3.60
  -9   1   1    6.00    3.70
  -8  -1   1   37.80    5.40
   8  -1  -1   45.20    7.00
  -8  -1   1   47.20    6.00
  -8  -1   1   49.10    6.20
  -8   1   1   51.59    7.10
   8   1  -1   45.70    6.50
  -8   1   1   45.10    6.50
  -8   1   1   53.09    7.10
  -8   1   1   53.59    4.80
   7  -1  -1  214.08   12.20
  -7  -1   1  194.18   11.70
  -7  -1   1  205.48   10.50
  -7  -1   1  193.98   11.00
  -7  -1   1  200.98   10.50
  -7   1   1  194.68   11.90
   7   1  -1  219.18   11.20
  -7   1   1  210.28   13.70
  -7   1   1  211.18    9.60
  -7   1   1  200.48   11.50
  -7   1   1  198.98   11.40
   6  -1  -1  288.67   14.70
  -6  -1   1  317.77   14.10
  -6  -1   1  320.07   13.20
  -6  -1   1  310.27   14.10
  -6  -1   1  314.97   13.20
  -6   1   1  313.87   12.90
   6   1  -1  311.27   13.80
  -6   1   1  313.37   14.30
  -6   1   1  311.87   15.10
  -6   1   1  302.97   14.10
  -6   1   1  313.27   16.20
  -5  -1   1   26.70    3.00
  -5  -1   1   30.10    3.80
  -5  -1   1   27.40    3.10
  -5  -1   1   27.40    3.70
   5  -1  -1   30.20    4.40
  -5   1   1   26.40    3.70
  -5   1   1   33.30    5.30
  -5   1   1   25.80    3.40
  -5   1   1   27.60    3.80
  -5   1   1   21.60    3.90
   5   1  -1   29.00    3.70
   4  -1  -1  222.38   10.60
  -4  -1   1  214.48    8.50
  -4  -1   1  223.98    8.60
  -4  -1   1  234.38    9.80
  -4  -1   1  224.38    9.60
  -4   1   1  220.48   10.00
   4   1  -1  228.98    9.30
  -4   1   1  227.18   10.80
  -4   1   1  212.18   11.10
  -4   1   1  224.48    9.80
  -4   1   1  228.98   10.10
  -3  -1   1  137.49    6.20
  -3  -1   1  135.39    6.10
   3  -1  -1  138.89    7.10
  -3   1   1  142.29    7.70
   3   1  -1  139.09    5.70
  -3   1   1  138.29    7.30
   3   1  -1  135.59    5.20
  -3   1   1  131.49    6.60
  -3   1   1  133.09    6.70
  -3   1   1  141.89    6.80
   2  -1  -1    0.70    1.70
  -2  -1   1    3.80    1.10
  -2  -1   1    4.00    2.40
   2   1  -1    1.90    0.90
  -2   1   1   -1.00    1.70
  -2   1   1    2.60    1.40
  -2   1   1    4.70    1.80
  -2   1   1   -0.50    1.30
  -2   1   1    2.80    1.70
   1  -1  -1  268.57   10.10
  -1  -1   1  256.37   10.20
   1  -1  -1  267.07   10.00
  -1   1   1  269.57   10.00
  -1   1   1  267.57    9.70
  -1   1   1  264.87   10.20
  -1   1   1  248.18    9.70
   0  -1   1 1193.98   38.40
   0  -1   1 1148.39   38.30
   0  -1   1 1176.88   37.80
   0  -1  -1 1163.18   38.10
   0  -1  -1 1163.08   38.50
   0   1   1 1145.69   38.50
   0   1  -1 1101.59   38.20
   0   1   1 1200.28   38.00
  -1  -1  -1  277.47   10.50
   1  -1   1  290.67   11.00
  -1  -1  -1  277.57   10.20
  -1  -1  -1  282.27   10.20
  -1  -1  -1  285.27   10.70
  -1  -1  -1  277.17   10.60
   1  -1   1  285.17   11.10
  -1   1  -1  294.97   11.10
  -1   1  -1  284.97   10.10
  -1   1  -1  301.07   10.90
  -1   1  -1  303.77   10.90
   1   1   1  298.67   10.40
   1   1   1  270.07   10.60
  -2  -1  -1  214.18    9.00
  -2  -1  -1  212.68    8.50
  -2  -1  -1  223.98    9.50
   2  -1   1  221.28    9.70
  -2  -1  -1  208.48    9.40
  -2  -1  -1  211.08    9.10
   2  -1   1  222.28    9.70
  -2  -1  -1  213.68    9.00
  -2  -1  -1  213.38    8.40
  -2   1  -1  224.38    9.70
   2   1   1  233.48    8.80
  -2   1  -1  196.58    9.30
  -2   1  -1  211.08    9.10
   2   1   1  224.58    9.00
  -2   1  -1  220.98    9.20
  -2   1  -1  209.08    9.20
  -3  -1  -1  403.66   15.00
   3  -1   1  411.96   16.70
  -3  -1  -1  416.86   16.70
  -3  -1  -1  410.66   16.10
  -3  -1  -1  396.16   15.20
  -3  -1  -1  421.76   15.20
  -3  -1  -1  417.36   16.10
   3  -1   1  421.76   16.80
   3   1   1  428.06   16.00
  -3   1  -1  400.16   16.70
   3   1   1  436.06   14.00
   3   1   1  429.56   15.70
  -3   1  -1  423.66   16.80
  -3   1  -1  409.16   16.10
  -3   1  -1  400.16   16.00
  -3   1  -1  418.66   16.20
  -3   1  -1  420.86   16.90
  -4  -1  -1  105.69    6.00
   4  -1   1  116.69    7.40
  -4  -1  -1  105.29    7.80
   4  -1   1  107.79    7.30
  -4  -1  -1  104.09    6.70
  -4  -1  -1  116.59    7.50
  -4  -1  -1  104.39    6.00
  -4  -1  -1  106.19    5.50
  -4   1  -1  106.99    6.60
  -4   1  -1  105.99    6.70
   4   1   1   99.99    6.50
  -4   1  -1  110.69    6.80
  -4   1  -1  104.69    7.20
   4   1   1  104.59    6.40
  -4   1  -1   95.19    7.30
   4   1   1  106.89    4.60
  -5  -1  -1   83.89    5.80
   5  -1   1   87.59    6.90
  -5  -1  -1   92.79    9.30
  -5  -1  -1   74.19    6.80
  -5  -1  -1   71.19    5.40
   5  -1   1   81.69    7.70
  -5  -1  -1   83.49    4.80
  -5   1  -1   84.29    6.00
  -5   1  -1   72.29    6.60
   5   1   1   77.09    6.10
  -5   1  -1   87.39    8.00
   5   1   1   83.39    3.70
   5   1   1   88.09    6.30
  -5   1  -1   76.29    8.50
  -5   1  -1   82.99    7.00
  -6  -1  -1   21.30    2.80
   6  -1   1   28.80    5.00
  -6  -1  -1   23.00    4.30
  -6  -1  -1   23.90    3.70
  -6  -1  -1   22.50    5.60
  -6  -1  -1   24.50    4.00
   6  -1   1   24.60    4.90
   6   1   1   23.40    4.30
  -6   1  -1   21.00    4.20
  -6   1  -1   19.90    4.50
  -6   1  -1   20.90    5.10
  -6   1  -1   16.60    3.80
  -6   1  -1   17.30    3.30
   6   1   1   27.80    4.40
  -7  -1  -1   96.19    8.90
   7  -1   1   88.19    9.20
  -7  -1  -1   86.09   10.80
  -7  -1  -1   89.09    8.00
  -7  -1  -1   88.89    4.80
  -7  -1  -1   79.29    7.50
   7  -1   1   90.19    9.00
  -7   1  -1   77.79    8.30
  -7   1  -1   92.69    9.20
  -7   1  -1   90.09    6.60
   7   1   1   86.19    8.40
  -7   1  -1   84.79   10.40
  -7   1  -1   95.59    9.00
   8  -1   1  190.78   13.00
  -8  -1  -1  190.68   14.40
  -8  -1  -1  185.88   11.60
  -8  -1  -1  172.88   11.00
  -8  -1  -1  196.78   12.10
  -8   1  -1  180.38   11.70
  -8   1  -1  188.68   12.30
   8   1   1  168.88   11.90
  -8   1  -1  197.28   12.70
  -8   1  -1  180.08   10.00
  -8   1  -1  175.38   15.90
  -9  -1  -1    7.00    3.50
   9  -1   1   13.10    5.20
  -9  -1  -1   14.00    4.50
  -9  -1  -1    0.40    4.80
  -9  -1  -1   11.70    4.60
  -9   1  -1    5.50    5.40
  -9   1  -1    6.10    3.80
   9   1   1   13.50    5.20
  -9   1  -1    1.30    3.80
  -9   1  -1    9.10    4.40
 -10  -1  -1   78.29   12.60
  10  -1   1   53.79    9.30
 -10  -1  -1   76.09    9.70
 -10  -1  -1   64.19    9.10
 -10   1  -1   69.59   10.00
 -10   1  -1   70.49   11.70
 -10   1  -1   87.19   10.70
 -11  -1  -1  119.69   13.00
 -11  -1  -1  122.29   12.80
 -11   1  -1  104.79   12.40
 -11   1  -1  105.19   15.40
 -11   1  -1  104.49   13.10
 -12  -1  -1   31.40    7.80
 -12  -1  -1   16.00    6.60
 -12   1  -1   27.50    8.30
 -12   1  -1   28.80    8.20
 -13  -1  -1    1.50    4.90
 -13  -1  -1   10.40    6.90
 -13   1  -1   10.00    6.20
 -13   1  -1   19.00    8.10
 -13  -2   1   19.70    7.00
 -13   2   1   18.90    7.20
 -13   2   1   24.90    8.60
 -12  -2   1   37.50    7.60
 -12  -2   1   29.70    7.00
 -12   2   1   32.30    8.80
 -12   2   1   37.70    9.40
 -11  -2   1   -1.60    3.10
 -11  -2   1    1.20    3.50
 -11  -2   1    0.40    3.00
 -11   2   1    0.60    4.70
 -11   2   1   19.30    5.70
 -10  -2   1    3.80    3.50
 -10  -2   1   -0.20    3.20
 -10  -2   1    3.00    2.80
  10  -2  -1   -1.50    4.60
 -10   2   1    5.50    3.90
 -10   2   1   -1.80    3.50
   9  -2  -1  148.79   14.30
  -9  -2   1  158.58   10.40
  -9  -2   1  166.48   10.40
  -9  -2   1  163.68   10.40
  -9   2   1  164.98   12.00
  -9   2   1  130.79   12.80
  -9   2   1  166.98   12.30
  -8  -2   1  165.48   10.10
   8  -2  -1  168.58   12.30
  -8  -2   1  169.98    9.90
  -8  -2   1  162.48    9.50
  -8   2   1  180.68   12.30
  -8   2   1  191.18   12.10
  -8   2   1  163.28   15.40
  -8   2   1  188.98   11.70
  -8   2   1  151.18    9.10
  -7  -2   1   34.40    4.70
  -7  -2   1   41.90    4.50
  -7  -2   1   34.40    4.80
   7  -2  -1   40.00    6.30
  -7  -2   1   33.60    4.20
  -7   2   1   24.10    5.60
  -7   2   1   29.00    4.50
   7   2  -1   32.70    4.60
  -7   2   1   32.00    5.10
  -7   2   1   34.00    6.00
  -7   2   1   46.00    6.40
  -6  -2   1   37.20    3.70
  -6  -2   1   45.20    4.80
  -6  -2   1   47.20    4.20
  -6  -2   1   39.80    4.50
   6  -2  -1   42.30    6.20
  -6   2   1   36.10    5.10
  -6   2   1   53.29    6.50
   6   2  -1   47.90    4.80
  -6   2   1   39.30    6.50
  -6   2   1   36.20    4.80
  -6   2   1   39.10    5.40
  -5  -2   1  174.28    8.00
   5  -2  -1  142.89    9.40
  -5  -2   1  165.78    7.90
  -5  -2   1  158.78    6.70
  -5  -2   1  153.78    6.60
  -5   2   1  154.88    9.70
  -5   2   1  168.58    9.20
  -5   2   1  166.98    8.80
   5   2  -1  152.88    7.40
  -5   2   1  178.58    9.50
  -5   2   1  167.48   10.10
   4  -2  -1  208.38   10.80
  -4  -2   1  207.08    8.60
  -4  -2   1  193.28   11.20
  -4  -2   1  203.98    8.60
  -4   2   1  197.68   10.60
  -4   2   1  213.28   10.70
   4   2  -1  211.78    7.90
  -4   2   1  214.68   10.10
  -4   2   1  211.68   10.10
  -4   2   1  206.88   10.10
  -3  -2   1  141.19    5.60
   3  -2  -1  147.59    8.00
  -3  -2   1  137.39    8.40
  -3  -2   1  135.09    5.60
  -3   2   1  137.79    7.50
  -3   2   1  117.79    7.70
  -3   2   1  137.59    7.60
  -3   2   1  148.79    7.60
  -3   2   1  142.49    7.40
   2  -2  -1  215.48    9.70
  -2  -2   1  213.78    9.90
  -2   2   1  196.58    9.00
  -2   2   1  191.88    9.40
  -2   2   1  202.38    9.20
  -2   2   1  219.78    9.30
  -2   2   1  218.08    8.80
   1  -2  -1  446.76   16.80
  -1  -2   1  438.86   15.20
  -1  -2   1  456.55   15.20
  -1   2   1  451.85   16.40
  -1   2   1  468.25   16.80
   1   2  -1  443.56   15.10
   0  -2  -1   -0.30    1.00
   0  -2   1    2.30    1.30
   0  -2  -1    0.60    1.50
   0  -2   1    3.10    1.40
   0  -2   1    0.30    1.20
   0  -2  -1    2.10    1.60
   0   2  -1    1.30    1.10
   0   2  -1    0.10    1.10
   0   2   1    1.90    1.10
   0   2   1    1.60    1.40
  -1  -2  -1    5.50    1.20
  -1  -2  -1    4.50    1.30
  -1  -2  -1    3.70    1.60
  -1  -2  -1    5.80    1.50
  -1  -2  -1    3.60    1.50
   1  -2   1    4.40    1.90
  -1  -2  -1    3.70    1.90
  -1  -2  -1    6.00    1.70
   1  -2   1    3.40    2.00
  -1   2  -1    2.70    1.80
  -1   2  -1    9.50    2.20
   1   2   1    4.70    1.50
   1   2   1    2.10    1.40
  -1   2  -1    2.90    1.80
  -2  -2  -1 2391.76   79.59
  -2  -2  -1 2431.26   81.59
  -2  -2  -1 2505.05   79.89
   2  -2   1 2518.95   82.99
  -2  -2  -1 2373.26   79.69
  -2  -2  -1 2411.76   81.59
   2  -2   1 2496.85   81.89
  -2  -2  -1 2464.95   78.49
  -2  -2  -1 2447.06   78.19
  -2  -2  -1 2508.15   81.99
  -2   2  -1 2571.34   81.69
   2   2   1 2510.05   81.49
  -2   2  -1 2441.86   80.29
  -2   2  -1 2572.14   81.29
  -2   2  -1 2605.34   82.99
   2   2   1 2513.25   80.29
  -3  -2  -1  479.95   18.20
   3  -2   1  468.15   19.60
  -3  -2  -1  501.45   19.10
  -3  -2  -1  486.65   16.90
  -3  -2  -1  481.55   17.20
   3  -2   1  501.55   19.70
  -3  -2  -1  501.95   19.20
  -3  -2  -1  489.75   19.20
  -3  -2  -1  494.55   18.30
   3   2   1  503.15   17.80
  -3   2  -1  487.45   19.10
   3   2   1  482.35   18.00
  -3   2  -1  487.35   19.70
  -3   2  -1  486.95   19.50
  -3   2  -1  495.45   19.00
  -3   2  -1  486.55   19.00
  -3   2  -1  495.35   19.10
  -4  -2  -1  180.78   10.10
   4  -2   1  189.78   10.30
  -4  -2  -1  172.48    8.80
  -4  -2  -1  174.98    7.90
  -4  -2  -1  167.98    7.90
  -4  -2  -1  183.88    9.00
  -4  -2  -1  170.28    6.90
   4  -2   1  174.58   10.20
  -4   2  -1  183.08   10.30
  -4   2  -1  192.08    9.80
   4   2   1  179.18    8.50
  -4   2  -1  186.68   10.30
  -4   2  -1  182.28    9.60
  -4   2  -1  176.48    9.40
   4   2   1  180.08    8.60
  -5  -2  -1  129.89    5.30
  -5  -2  -1  147.09    7.30
  -5  -2  -1  121.69    7.00
   5  -2   1  131.09    9.00
   5  -2   1  142.59    9.30
  -5  -2  -1  120.19    7.60
  -5  -2  -1  116.29    9.00
  -5  -2  -1  129.99    7.90
  -5   2  -1  145.89    8.50
   5   2   1  125.69    7.60
  -5   2  -1  149.69    9.00
  -5   2  -1  136.99    8.50
   5   2   1  134.29    5.80
   5   2   1  128.19    7.50
  -5   2  -1  143.69    9.80
  -5   2  -1  136.29    9.20
   6  -2   1  149.88   10.70
  -6  -2  -1  183.78   10.00
  -6  -2  -1  179.58    9.30
  -6  -2  -1  167.08   11.70
  -6  -2  -1  160.38    8.90
   6  -2   1  144.59   10.80
  -6  -2  -1  174.58   10.10
  -6   2  -1  195.08   12.30
  -6   2  -1  168.48    9.80
  -6   2  -1  192.28   11.40
  -6   2  -1  179.78   10.60
   6   2   1  170.58    9.40
   6   2   1  176.18    9.80
   6   2   1  174.48    6.70
  -6   2  -1  169.28   10.60
  -7  -2  -1   13.00    5.30
  -7  -2  -1   12.70    3.80
   7  -2   1   12.20    4.50
  -7  -2  -1   11.70    3.30
  -7  -2  -1   15.60    3.40
   7  -2   1   13.60    4.40
  -7   2  -1   14.40    5.20
  -7   2  -1   17.70    4.60
  -7   2  -1   15.30    4.90
  -7   2  -1   14.00    3.80
  -7   2  -1   16.60    4.30
   7   2   1   10.00    4.00
  -8  -2  -1   81.39    8.00
   8  -2   1   75.19    9.60
  -8  -2  -1   64.49   10.30
  -8  -2  -1   72.69    7.50
  -8  -2  -1   58.79    7.30
  -8   2  -1   76.49    8.70
  -8   2  -1   68.09   10.00
   8   2   1   62.89    7.90
  -8   2  -1   88.29    9.80
  -8   2  -1   60.89    8.60
  -8   2  -1   57.09    6.70
  -9  -2  -1   87.49   12.70
   9  -2   1  103.79   11.90
  -9  -2  -1   88.49    9.00
  -9  -2  -1   89.99    9.40
  -9   2  -1   80.49    9.70
  -9   2  -1   75.89   11.40
  -9   2  -1   84.69    8.20
  -9   2  -1   88.09   10.80
 -10  -2  -1  192.48   13.20
 -10  -2  -1  201.78   13.40
  10  -2   1  175.68   16.90
 -10   2  -1  184.78   18.80
 -10   2  -1  213.28   15.50
 -10   2  -1  191.18   14.80
 -11  -2  -1   -2.60    3.60
 -11  -2  -1    9.00    4.50
 -11   2  -1    2.20    5.20
 -11   2  -1   -4.70    5.70
 -11   2  -1    1.60    4.20
 -12  -2  -1   44.80    8.40
 -12  -2  -1   47.10    8.80
 -12   2  -1   29.50    9.50
 -12   2  -1   26.60    8.00
 -13  -2  -1   28.70    8.20
 -13  -2  -1   21.90    7.10
 -13   2  -1   25.90    8.80
 -13  -3   1    2.30    4.90
 -13   3   1    6.70    7.00
 -12  -3   1   -2.60    3.90
 -12  -3   1    4.70    4.50
 -12   3   1   -6.30    4.30
 -12   3   1   -0.30    5.70
 -11  -3   1   -0.80    3.10
 -11  -3   1   -1.00    2.90
 -11  -3   1    4.50    3.90
 -11   3   1    3.60    4.40
 -11   3   1   -6.70    4.50
 -10  -3   1   33.70    5.60
  10  -3  -1   20.60    6.60
 -10  -3   1   29.10    5.30
 -10  -3   1   26.30    5.20
 -10   3   1   20.30    6.20
 -10   3   1   39.50    7.90
  -9  -3   1   19.20    4.30
  -9  -3   1   10.50    3.50
  -9  -3   1    6.90    3.10
   9  -3  -1   20.60    6.10
  -9   3   1   14.20    6.30
  -9   3   1   12.00    4.00
  -9   3   1    9.80    5.00
  -9   3   1   14.10    5.20
  -8  -3   1   52.59    5.60
  -8  -3   1   56.29    6.00
  -8  -3   1   67.29    6.20
   8  -3  -1   66.39    9.10
  -8   3   1   72.09    8.70
  -8   3   1   60.09    6.80
  -8   3   1   47.20    7.70
  -8   3   1   60.49    7.90
  -8   3   1   40.60    8.00
  -7  -3   1    2.00    1.90
  -7  -3   1    0.00    1.60
  -7  -3   1   -1.30    1.70
   7  -3  -1   -1.20    3.10
  -7  -3   1   -0.70    1.50
  -7   3   1   -0.70    2.40
  -7   3   1   -1.40    2.10
  -7   3   1    0.80    2.30
   7   3  -1   -0.30    2.40
  -7   3   1   -3.10    2.70
  -7   3   1   -2.50    3.00
  -6  -3   1   98.49    5.80
  -6  -3   1   86.99    4.80
  -6  -3   1   98.79    5.80
  -6  -3   1   98.79    4.90
   6  -3  -1   88.49    9.00
  -6   3   1   88.49    9.30
  -6   3   1   96.69    9.70
   6   3  -1   90.39    5.60
  -6   3   1   94.09    7.20
  -6   3   1  100.89    9.40
  -6   3   1  101.29    7.70
  -5  -3   1  127.39    9.60
   5  -3  -1  125.39    9.10
  -5  -3   1  128.59    6.40
  -5  -3   1  128.49    6.40
   5   3  -1  139.79    6.00
  -5   3   1  138.19    8.60
  -5   3   1  133.89    8.40
  -5   3   1  135.59    8.70
  -5   3   1  119.79    8.90
  -5   3   1  131.79    9.10
  -4  -3   1   -1.20    1.10
  -4  -3   1    4.20    3.20
  -4  -3   1    1.90    1.20
   4  -3  -1    0.30    2.50
  -4   3   1   -1.70    1.90
  -4   3   1    1.40    2.40
  -4   3   1    2.90    2.20
  -4   3   1    2.10    2.50
  -4   3   1   -1.70    2.40
  -3  -3   1  102.19    7.40
   3  -3  -1  116.99    7.40
  -3   3   1  111.49    6.80
  -3   3   1   98.19    6.60
  -3   3   1   95.99    6.30
  -3   3   1   93.19    6.70
  -3   3   1   94.59    6.60
   2  -3  -1   27.80    4.20
  -2  -3   1   27.60    2.20
  -2  -3   1   33.00    2.10
  -2   3   1   25.20    3.80
  -2   3   1   32.40    3.40
  -2   3   1   42.60    4.50
  -2   3   1   24.40    3.80
  -1  -3   1  465.95   15.70
   1  -3  -1  448.36   18.00
  -1  -3   1  461.95   15.70
  -1  -3   1  469.95   15.70
  -1  -3   1  470.55   16.60
  -1  -3   1  470.15   16.70
   1   3  -1  482.45   16.10
   1   3  -1  475.25   16.50
  -1   3   1  463.85   17.60
   1   3  -1  488.05   16.60
  -1   3   1  480.05   18.10
   0  -3   1    0.50    1.30
   0  -3   1    1.70    1.40
   0  -3  -1    2.20    1.50
   0  -3  -1    1.20    1.80
   0  -3   1   -0.30    1.70
   0  -3  -1    1.90    1.80
   0  -3   1    1.80    1.70
   0   3   1    1.60    1.90
   0   3  -1   -0.20    1.50
   0   3  -1    3.20    1.60
   0   3  -1    0.20    1.60
   0   3   1    1.30    1.70
  -1  -3  -1   21.20    3.00
   1  -3   1   17.00    3.20
  -1  -3  -1   18.10    2.60
  -1  -3  -1   16.20    2.20
  -1  -3  -1   22.70    2.60
   1  -3   1   18.60    3.40
   1  -3   1   14.70    2.60
  -1  -3  -1   14.00    2.40
  -1  -3  -1   19.90    2.40
  -1  -3  -1   24.40    3.10
   1   3   1   23.10    2.80
  -1   3  -1   19.40    3.20
   1   3   1   20.70    2.70
  -1   3  -1   22.30    3.10
  -1   3  -1   19.00    3.30
  -2  -3  -1  346.37   13.60
  -2  -3  -1  340.87   12.60
  -2  -3  -1  347.37   14.10
   2  -3   1  339.67   14.80
   2  -3   1  374.26   15.30
  -2  -3  -1  377.46   14.10
  -2  -3  -1  347.67   13.60
  -2  -3  -1  334.77   12.70
  -2  -3  -1  353.96   13.70
  -2   3  -1  366.06   15.10
  -2   3  -1  340.57   14.50
   2   3   1  345.67   13.40
  -2   3  -1  335.27   14.30
  -2   3  -1  342.27   14.50
   2   3   1  364.86   13.10
   3  -3   1  228.68   12.00
  -3  -3  -1  236.98    9.30
  -3  -3  -1  240.48   10.20
  -3  -3  -1  259.37   11.60
  -3  -3  -1  246.78   11.50
  -3  -3  -1  238.88    9.40
  -3  -3  -1  247.88   10.40
  -3  -3  -1  216.58   11.10
   3  -3   1  253.77   12.20
  -3  -3  -1  235.18    8.40
   3   3   1  232.68   10.00
  -3   3  -1  271.17   11.90
  -3   3  -1  216.38   11.30
   3   3   1  227.88    9.70
  -3   3  -1  249.38   11.50
  -3   3  -1  246.28   12.00
  -3   3  -1  246.48   12.00
   4  -3   1  100.89    7.90
   4  -3   1  107.09    8.00
  -4  -3  -1  109.99    7.80
  -4  -3  -1  105.39    6.30
  -4  -3  -1  112.59    6.40
  -4  -3  -1  111.39    8.00
  -4  -3  -1  108.99    5.50
  -4   3  -1  108.59    8.00
   4   3   1  104.59    6.00
  -4   3  -1  105.09    7.40
  -4   3  -1   93.99    7.30
  -4   3  -1  109.59    7.50
  -4   3  -1  117.69    8.60
  -4   3  -1   95.19    7.40
   4   3   1  102.19    5.90
   5  -3   1   27.90    5.10
  -5  -3  -1   30.20    3.90
  -5  -3  -1   29.00    3.90
   5  -3   1   31.80    5.40
  -5  -3  -1   24.80    4.80
  -5  -3  -1   30.10    3.50
  -5   3  -1   26.60    4.60
   5   3   1   26.40    3.60
   5   3   1   24.80    3.70
  -5   3  -1   19.50    3.90
  -5   3  -1   18.40    4.30
  -5   3  -1   21.30    4.60
  -5   3  -1   24.50    4.60
   6  -3   1   -1.50    2.90
  -6  -3  -1   -3.40    1.90
   6  -3   1   -3.30    2.60
  -6  -3  -1    3.60    3.40
  -6  -3  -1    0.10    1.70
  -6  -3  -1    1.40    2.20
   6   3   1   -0.40    2.10
  -6   3  -1    4.40    3.30
  -6   3  -1   -2.80    2.60
   6   3   1    1.90    2.10
  -6   3  -1   -4.50    1.80
  -6   3  -1    2.60    2.50
  -6   3  -1    4.20    2.70
  -7  -3  -1   98.69    7.20
  -7  -3  -1  103.49    7.60
  -7  -3  -1  108.79   11.70
   7  -3   1   91.49   10.60
  -7   3  -1   98.89    9.40
  -7   3  -1  103.69   10.70
  -7   3  -1  118.69   12.20
  -7   3  -1   86.89    9.00
  -7   3  -1  106.49    8.30
   7   3   1  107.79    7.90
  -8  -3  -1    2.50    2.80
   8  -3   1   -1.40    4.00
  -8  -3  -1    2.00    3.80
  -8  -3  -1    4.10    2.90
   8   3   1    9.60    4.00
  -8   3  -1   -2.80    2.30
  -8   3  -1    4.30    3.80
  -8   3  -1   -0.40    4.20
  -8   3  -1   -0.80    3.40
  -8   3  -1   -1.50    2.60
   9  -3   1    3.90    4.80
  -9  -3  -1    7.40    3.90
  -9  -3  -1    8.30    3.70
  -9   3  -1   -0.30    4.20
  -9   3  -1    2.40    3.70
  -9   3  -1    2.10    4.70
  -9   3  -1   15.80    4.40
  10  -3   1    0.30    4.20
 -10  -3  -1    0.80    3.10
 -10  -3  -1    0.90    3.10
 -10   3  -1   -3.10    4.60
 -10   3  -1   -3.20    4.30
 -10   3  -1    4.70    4.60
  11  -3   1    3.20    5.30
 -11  -3  -1   -1.30    3.60
 -11  -3  -1   -0.70    3.30
 -11   3  -1   -2.30    4.70
 -11   3  -1    2.90    6.50
 -11   3  -1   10.10    5.70
 -12  -3  -1   12.10    5.60
 -12  -3  -1   20.70    6.30
 -12   3  -1   21.20    8.70
 -13  -3  -1    4.90    5.40
 -13  -3  -1    3.00    5.60
 -13   3  -1    9.20    7.30
 -13  -4   1   21.20    6.20
 -13   4   1   29.30    9.90
 -12  -4   1  108.49   11.30
 -12   4   1  103.49   14.50
 -11  -4   1   -2.70    3.10
  11  -4  -1    9.70    6.50
 -11  -4   1    0.70    3.10
 -11   4   1   10.10    5.90
 -11   4   1    6.50    5.80
 -10  -4   1    0.10    2.30
  10  -4  -1    5.80    5.50
 -10  -4   1   -0.70    2.80
 -10  -4   1   -2.80    2.40
 -10   4   1   -7.00    3.90
 -10   4   1   -2.00    3.90
  -9  -4   1   35.80    5.10
  -9  -4   1   30.40    4.60
   9  -4  -1   35.40    8.00
  -9  -4   1   28.40    4.50
  -9   4   1   29.90    6.80
  -9   4   1   27.70    5.50
  -9   4   1   32.70    8.10
  -9   4   1   31.00    7.20
  -8  -4   1   36.50    4.40
  -8  -4   1   37.10    4.40
  -8  -4   1   36.20    4.50
   8  -4  -1   35.10    7.50
  -8   4   1   31.70    6.70
  -8   4   1   33.80    7.10
  -8   4   1   42.70    6.90
  -8   4   1   32.90    5.80
   7  -4  -1   95.89   10.50
  -7  -4   1   76.89    5.00
  -7  -4   1   77.69    5.40
  -7  -4   1   78.99    5.40
  -7  -4   1   74.69    4.90
  -7   4   1   77.09    8.30
  -7   4   1   93.29   10.50
  -7   4   1   98.19   10.30
  -7   4   1   91.39    9.20
  -7   4   1   97.59   10.20
  -6  -4   1   87.89    5.20
  -6  -4   1   85.29    9.70
  -6  -4   1   94.49    5.20
  -6  -4   1   82.99    4.00
   6  -4  -1   98.09   10.00
  -6  -4   1   81.49    4.00
  -6   4   1  110.49    8.40
  -6   4   1   85.09    9.20
  -6   4   1   82.19    8.90
  -6   4   1   85.39    8.30
   6   4  -1   81.49    4.90
  -6   4   1   92.19    8.90
   5  -4  -1   82.59    8.50
  -5  -4   1   75.09    4.20
  -5  -4   1   74.69    4.10
  -5  -4   1   67.99    8.40
  -5   4   1   82.89    8.20
  -5   4   1   70.19    7.20
   5   4  -1   67.09    3.60
  -5   4   1   72.49    7.60
  -5   4   1   66.99    8.00
  -5   4   1   85.59    7.80
  -4  -4   1   38.30    2.50
  -4  -4   1   34.80    2.50
  -4  -4   1   47.50    6.50
   4  -4  -1   41.00    5.70
  -4   4   1   41.60    5.40
  -4   4   1   24.80    4.00
  -4   4   1   49.50    6.20
  -4   4   1   34.20    4.90
  -4   4   1   33.80    4.90
  -3  -4   1   49.70    6.00
   3  -4  -1   55.39    6.40
  -3  -4   1   61.19    3.30
  -3  -4   1   59.99    3.10
  -3   4   1   63.29    6.40
  -3   4   1   56.59    5.30
  -3   4   1   62.19    6.10
  -3   4   1   49.70    5.30
   2  -4  -1 2202.38   74.49
  -2  -4   1 2215.58   72.19
  -2  -4   1 2237.08   72.29
   2   4  -1 2187.98   71.79
  -2   4   1 2251.17   69.39
  -2   4   1 2186.88   73.79
  -2   4   1 2112.19   74.79
   2   4  -1 2231.78   70.79
   1  -4  -1  220.58   10.90
   1  -4  -1  232.88   10.40
  -1  -4   1  222.78    8.90
   1  -4  -1  238.48   11.30
  -1  -4   1  235.68    9.00
  -1  -4   1  226.78    9.60
   1   4  -1  223.68    9.20
  -1   4   1  222.08   10.90
   1   4  -1  218.28    9.40
   1   4  -1  236.08    9.30
  -1   4   1  247.18   10.90
   0  -4   1   14.70    3.00
   0  -4  -1    9.10    2.10
   0  -4   1   11.40    2.30
   0  -4   1   11.60    2.70
   0  -4  -1   12.00    2.80
   0  -4  -1   12.60    3.10
   0  -4   1   12.50    2.30
   0  -4  -1   12.60    2.80
   0   4  -1   12.40    2.70
   0   4   1    9.50    2.60
   0   4  -1   10.70    2.50
   0   4   1   12.90    3.00
   0   4  -1   12.00    2.60
   1  -4   1  152.28    8.40
   1  -4   1  152.28    8.30
  -1  -4  -1  143.09    7.00
  -1  -4  -1  139.09    7.20
   1  -4   1  141.59    7.60
  -1  -4  -1  143.09    6.70
  -1  -4  -1  141.79    7.50
  -1  -4  -1  138.09    6.90
   1   4   1  144.09    7.20
  -1   4  -1  153.88    8.00
  -1   4  -1  128.79    7.70
   1   4   1  145.39    7.30
  -1   4  -1  135.79    7.30
  -2  -4  -1  183.18    8.70
  -2  -4  -1  179.68    8.10
  -2  -4  -1  192.18    8.90
  -2  -4  -1  183.28    7.90
   2  -4   1  201.48   10.60
  -2  -4  -1  190.78    9.10
   2  -4   1  180.68   10.10
   2   4   1  200.98    8.70
  -2   4  -1  198.88   10.40
   2   4   1  201.58    8.50
  -2   4  -1  197.08    9.90
  -3  -4  -1    9.10    3.10
   3  -4   1    5.00    3.30
  -3  -4  -1   14.90    2.20
  -3  -4  -1   11.50    2.50
  -3  -4  -1   12.80    2.00
   3  -4   1   12.10    3.60
  -3  -4  -1   10.40    3.10
  -3  -4  -1   12.30    3.10
  -3  -4  -1   11.90    2.50
  -3   4  -1   11.00    3.20
   3   4   1   17.40    2.60
  -3   4  -1   12.60    4.00
   3   4   1    9.40    2.20
  -3   4  -1   12.20    3.50
  -3   4  -1   13.30    3.30
   4  -4   1   66.69    7.40
  -4  -4  -1   57.29    6.70
  -4  -4  -1   54.59    4.90
  -4  -4  -1   50.29    3.70
  -4  -4  -1   56.39    4.90
  -4  -4  -1   58.49    7.00
   4  -4   1   53.79    6.70
  -4  -4  -1   63.89    7.00
  -4  -4  -1   56.09    3.90
  -4   4  -1   40.50    5.90
  -4   4  -1   54.29    6.90
   4   4   1   55.69    4.20
  -4   4  -1   47.60    5.80
  -4   4  -1   63.09    6.80
  -4   4  -1   43.60    5.60
   4   4   1   55.99    4.30
  -5  -4  -1   46.10    4.90
   5  -4   1   49.00    6.90
  -5  -4  -1   52.99    7.10
  -5  -4  -1   49.40    6.60
   5  -4   1   46.10    6.80
  -5  -4  -1   43.60    4.10
  -5  -4  -1   40.80    4.60
  -5   4  -1   43.80    6.10
  -5   4  -1   43.90    6.10
   5   4   1   41.90    4.40
   5   4   1   44.70    4.40
  -5   4  -1   36.40    5.90
  -5   4  -1   33.80    5.50
  -5   4  -1   44.90    6.10
  -6  -4  -1  218.68   10.80
  -6  -4  -1  209.98   10.00
  -6  -4  -1  218.48   10.90
  -6  -4  -1  216.28   13.60
   6  -4   1  245.28   14.10
   6  -4   1  197.98   13.10
  -6   4  -1  210.28   12.50
   6   4   1  203.98   10.50
  -6   4  -1  200.78   12.70
  -6   4  -1  227.28   13.80
  -6   4  -1  223.98   13.40
  -6   4  -1  201.18   12.50
  -7  -4  -1   32.80    4.50
  -7  -4  -1   44.10    5.50
   7  -4   1   41.60    7.40
   7   4   1   43.70    5.60
  -7   4  -1   39.80    7.30
  -7   4  -1   50.89    7.40
  -7   4  -1   29.20    5.60
  -7   4  -1   40.90    7.40
  -7   4  -1   35.20    5.90
   8  -4   1    2.90    4.40
  -8  -4  -1    0.50    2.60
  -8  -4  -1   -2.10    2.20
  -8   4  -1   -0.10    4.00
  -8   4  -1    0.10    2.80
  -8   4  -1    6.70    4.00
  -8   4  -1    8.10    4.60
  -9  -4  -1   20.30    4.80
  -9  -4  -1   27.70    5.10
   9  -4   1   29.10    7.40
  -9   4  -1   38.80    8.90
  -9   4  -1   22.70    5.50
  -9   4  -1   19.10    6.50
  -9   4  -1   21.90    6.30
 -10  -4  -1   13.50    4.70
  10  -4   1    6.90    6.30
 -10  -4  -1    8.80    4.10
 -10   4  -1   17.60    6.70
 -10   4  -1   20.90    6.30
 -10   4  -1   19.80    7.40
 -11  -4  -1   10.20    4.90
 -11  -4  -1    7.70    4.20
 -11  -4  -1   10.50    4.80
  11  -4   1    4.20    6.30
 -11   4  -1    4.10    6.60
 -11   4  -1    2.30    5.70
 -12  -4  -1   15.40    5.60
 -12  -4  -1   20.20    6.00
 -12   4  -1   26.90   10.00
 -12   4  -1   17.10    8.00
 -13  -4  -1   14.40    6.80
 -13   4  -1    7.40    8.10
 -13  -5   1    5.10    4.70
 -13   5   1  -12.50    5.60
 -12  -5   1   -0.30    3.60
 -12   5   1    4.30    6.00
 -11  -5   1  181.18   12.10
  11  -5  -1  196.78   19.40
 -11   5   1  175.38   18.50
 -10  -5   1   58.49    6.20
  10  -5  -1   50.29    9.50
 -10  -5   1   58.69    6.80
 -10   5   1   71.59   11.30
 -10   5   1   54.09    9.40
   9  -5  -1   19.30    6.50
  -9  -5   1   19.20    3.70
  -9  -5   1   16.40    3.40
  -9  -5   1   14.60    3.50
  -9   5   1   13.70    5.40
  -9   5   1   13.00    5.60
  -9   5   1   10.60    5.50
  -9   5   1   11.80    4.30
   8  -5  -1   14.20    5.70
  -8  -5   1    8.80    2.50
  -8  -5   1    6.50    2.40
  -8  -5   1    6.40    2.30
  -8   5   1    8.00    5.00
  -8   5   1    1.20    4.00
  -8   5   1   12.30    4.40
  -8   5   1    3.10    3.90
  -7  -5   1   41.60    8.00
  -7  -5   1   45.60    3.80
  -7  -5   1   46.10    4.30
  -7  -5   1   50.69    4.50
  -7  -5   1   50.59    3.60
   7  -5  -1   46.90    7.90
  -7   5   1   51.19    8.00
  -7   5   1   37.60    7.20
  -7   5   1   58.69    8.20
  -7   5   1   53.79    7.20
  -7   5   1   42.70    7.00
  -6  -5   1   30.90    6.30
  -6  -5   1   29.00    3.00
  -6  -5   1   28.70    2.90
   6  -5  -1   35.50    6.80
  -6   5   1   33.90    5.90
  -6   5   1   31.50    5.60
  -6   5   1   27.20    5.60
  -6   5   1   23.50    4.60
   6   5  -1   34.40    3.20
  -6   5   1   16.80    4.30
  -5  -5   1    6.30    1.60
   5  -5  -1    6.60    3.80
  -5  -5   1    7.60    1.50
  -5  -5   1    8.20    4.00
  -5   5   1    8.70    3.40
  -5   5   1    7.60    3.30
  -5   5   1    5.00    2.80
   5   5  -1    6.30    1.20
  -5   5   1    6.10    3.50
  -5   5   1    3.20    3.00
  -4  -5   1  560.54   19.70
  -4  -5   1  566.44   19.60
  -4  -5   1  552.64   24.20
   4  -5  -1  605.04   24.60
  -4   5   1  540.25   24.00
  -4   5   1  581.24   23.60
  -4   5   1  541.25   21.60
  -4   5   1  584.14   23.70
  -3  -5   1  924.61   32.20
   3  -5  -1  987.00   36.20
  -3  -5   1  918.61   32.10
  -3   5   1  972.80   35.30
  -3   5   1  989.60   36.30
  -3   5   1  937.21   32.30
  -3   5   1  978.00   35.20
   3   5  -1  908.51   31.10
  -2  -5   1   15.30    2.60
   2  -5  -1   10.70    3.60
  -2  -5   1    8.90    1.60
  -2  -5   1    9.60    2.10
   2   5  -1   13.30    2.40
  -2   5   1   11.90    3.30
  -2   5   1   13.90    2.30
   2   5  -1   13.60    2.20
  -2   5   1   15.20    3.80
   2   5  -1   10.70    2.00
  -1  -5   1  370.56   14.30
   1  -5  -1  394.86   16.70
  -1  -5   1  372.06   14.30
   1  -5  -1  367.46   16.30
   1  -5  -1  370.66   15.60
  -1  -5   1  353.96   15.00
  -1  -5   1  383.26   14.20
  -1  -5   1  387.76   13.10
  -1   5   1  365.96   16.10
   1   5  -1  378.36   14.80
  -1   5   1  390.96   16.10
   1   5  -1  384.16   14.60
   1   5  -1  380.36   14.10
   0  -5  -1   71.39    6.40
   0  -5   1   68.49    5.10
   0  -5   1   65.79    3.00
   0  -5   1   79.29    5.70
   0  -5  -1   66.09    5.20
   0  -5   1   66.09    5.10
   0  -5  -1   68.69    6.00
   0   5  -1   71.79    4.80
   0   5  -1   73.09    5.40
   0   5   1   71.19    6.00
   0   5   1   70.79    5.40
   0   5  -1   72.99    6.10
   1  -5   1  187.18    9.50
  -1  -5  -1  183.58    8.50
  -1  -5  -1  180.78    9.40
  -1  -5  -1  171.68    8.80
   1  -5   1  186.18   10.20
   1  -5   1  179.78   10.00
  -1  -5  -1  175.88    8.40
  -1  -5  -1  170.58    8.60
   1   5   1  170.38    8.80
  -1   5  -1  207.38   10.10
  -1   5  -1  201.88    9.90
   1   5   1  178.38    8.90
  -1   5  -1  190.28    9.10
  -2  -5  -1    6.40    1.90
  -2  -5  -1    9.50    2.60
   2  -5   1    6.00    3.30
  -2  -5  -1    5.20    2.20
  -2  -5  -1    6.90    2.00
   2  -5   1    6.10    2.80
  -2  -5  -1   -1.00    1.40
  -2  -5  -1    5.10    2.50
   2  -5   1    4.50    2.80
   2   5   1    4.60    2.10
  -2   5  -1    2.40    2.50
  -2   5  -1    9.90    3.50
  -2   5  -1    5.90    2.70
   2   5   1    4.50    2.10
  -3  -5  -1  142.09    6.90
  -3  -5  -1  151.98    9.20
  -3  -5  -1  141.19    7.00
  -3  -5  -1  148.79    7.90
   3  -5   1  144.59    9.70
   3  -5   1  147.29    9.90
  -3  -5  -1  156.98    7.90
  -3  -5  -1  157.48    8.80
   3   5   1  151.08    7.40
  -3   5  -1  153.58   10.00
  -3   5  -1  131.39    9.10
   3   5   1  161.68    7.60
  -3   5  -1  154.18    9.40
  -3   5  -1  152.38    9.30
   4  -5   1  488.65   22.30
   4  -5   1  521.15   22.80
  -4  -5  -1  504.65   19.40
  -4  -5  -1  473.85   18.20
  -4  -5  -1  505.35   18.30
  -4  -5  -1  493.35   19.40
  -4  -5  -1  497.05   20.80
  -4  -5  -1  536.75   21.80
   4   5   1  497.65   18.80
  -4   5  -1  508.55   21.80
  -4   5  -1  490.05   21.60
  -4   5  -1  520.45   20.90
  -4   5  -1  495.85   21.80
  -4   5  -1  534.85   22.90
   4   5   1  496.65   18.90
  -5  -5  -1   88.09    6.20
  -5  -5  -1   96.49    6.20
  -5  -5  -1   92.09    5.50
  -5  -5  -1  120.89   10.80
  -5  -5  -1   96.59    5.70
   5  -5   1   84.89    9.20
   5  -5   1   82.29    9.30
   5   5   1   86.89    5.80
  -5   5  -1   77.99    8.60
  -5   5  -1  102.79    9.80
  -5   5  -1  116.89   10.70
  -5   5  -1   85.19    8.50
  -5   5  -1   76.19    8.50
  -6  -5  -1   47.00    7.30
  -6  -5  -1   45.40    4.60
   6  -5   1   59.59    8.70
  -6  -5  -1   47.90    4.70
  -6  -5  -1   52.59    5.40
  -6  -5  -1   45.30    5.10
  -6   5  -1   38.00    6.20
  -6   5  -1   55.69    8.30
  -6   5  -1   28.90    5.90
   6   5   1   43.00    5.00
  -6   5  -1   46.80    6.70
  -6   5  -1   36.70    6.10
  -7  -5  -1  114.59    7.40
  -7  -5  -1  114.39    7.70
   7  -5   1   96.39   11.50
  -7  -5  -1  108.99    7.20
  -7   5  -1  113.49   10.70
  -7   5  -1  101.69   11.30
   7   5   1  118.99    8.00
  -7   5  -1  116.99   12.00
  -7   5  -1  134.69   13.20
  -8  -5  -1   48.70    6.10
  -8  -5  -1   43.00    5.50
  -8  -5  -1   40.50    5.60
   8  -5   1   61.39    9.80
  -8   5  -1   50.39    8.00
  -8   5  -1   44.70    8.10
  -8   5  -1   42.20    7.10
  -8   5  -1   32.70    7.30
   9  -5   1    5.60    5.10
  -9  -5  -1    4.10    3.20
  -9  -5  -1    0.30    2.80
  -9  -5  -1    7.50    3.30
  -9   5  -1    4.50    5.00
  -9   5  -1    2.80    4.80
  -9   5  -1    0.50    4.10
  -9   5  -1    3.00    3.60
 -10  -5  -1   14.80    4.60
 -10  -5  -1   12.00    4.10
 -10  -5  -1   14.90    4.50
  10  -5   1   12.70    6.40
 -10   5  -1    7.70    4.50
 -10   5  -1   18.40    6.80
 -10   5  -1    2.40    6.00
 -11  -5  -1   24.40    5.40
 -11  -5  -1   16.30    5.00
  11  -5   1   18.90    7.70
 -11  -5  -1   19.20    5.80
 -11   5  -1   21.80    8.60
 -11   5  -1   24.90    9.40
 -12  -5  -1   33.70    7.40
  12  -5   1   30.60   10.00
 -12   5  -1   18.30    9.00
 -12   5  -1   37.80    9.90
 -13  -5  -1   -0.20    4.40
 -13   5  -1   -6.40    6.80
 -13  -6   1    6.40    5.00
 -13  -6   1    4.40    4.40
 -13   6   1   14.40    8.80
 -12  -6   1   -3.70    3.10
 -12  -6   1    4.70    3.90
  12  -6  -1   -4.10    5.80
 -12   6   1   11.30    7.30
  11  -6  -1    5.20    6.40
 -11  -6   1   -4.60    2.50
 -11   6   1    6.10    6.10
 -10  -6   1    6.50    3.20
  10  -6  -1   14.50    7.50
 -10   6   1    7.10    4.20
 -10   6   1   10.90    6.80
   9  -6  -1   34.00    8.60
  -9  -6   1   25.60    4.00
  -9  -6   1   23.00    3.50
  -9   6   1   26.90    8.00
  -9   6   1   25.10    7.10
  -9   6   1   29.10    6.20
  -8  -6   1   57.29    5.00
   8  -6  -1   54.99    9.30
  -8  -6   1   59.09    4.40
  -8  -6   1   60.19    5.00
  -8   6   1   63.09    9.40
  -8   6   1   60.09    8.50
  -8   6   1   50.79    9.00
  -8   6   1   59.39    8.70
  -7  -6   1   35.10    3.40
  -7  -6   1   36.20    3.10
  -7  -6   1   29.40    2.90
  -7  -6   1   28.90    7.20
   7  -6  -1   32.50    7.60
  -7   6   1   23.20    6.20
  -7   6   1   23.10    5.40
  -7   6   1   30.60    6.60
  -7   6   1   40.50    7.10
   6  -6  -1    7.20    4.50
  -6  -6   1   11.40    5.00
  -6  -6   1    9.80    1.90
  -6  -6   1   11.40    2.00
  -6   6   1    1.50    3.30
  -6   6   1   10.00    4.30
  -6   6   1    9.30    3.70
  -6   6   1    3.20    3.20
  -6   6   1   10.00    4.40
  -5  -6   1   20.00    2.30
  -5  -6   1    6.20    4.20
   5  -6  -1    7.40    4.20
  -5  -6   1   17.10    2.30
  -5   6   1   16.10    4.70
   5   6  -1   15.10    2.00
  -5   6   1   18.80    4.70
  -5   6   1   11.90    4.10
  -5   6   1   15.40    4.10
  -4  -6   1  125.39    9.60
  -4  -6   1  126.29    6.10
  -4  -6   1  119.19    6.00
   4  -6  -1  139.19   10.40
  -4   6   1  125.39    8.00
   4   6  -1  123.09    5.50
  -4   6   1  125.89    9.30
  -4   6   1  132.99    9.40
  -4   6   1  139.89   10.20
  -3  -6   1  325.07   13.10
  -3  -6   1  337.77   11.80
  -3  -6   1  333.07   13.30
  -3  -6   1  313.87   11.80
   3  -6  -1  325.47   16.80
  -3   6   1  336.57   16.10
  -3   6   1  308.57   16.10
  -3   6   1  337.97   16.10
   3   6  -1  340.47   12.50
  -3   6   1  349.96   13.70
  -2  -6   1   47.70    3.70
   2  -6  -1   55.09    5.80
  -2  -6   1   62.69    4.90
  -2  -6   1   48.20    3.80
  -2  -6   1   56.59    4.80
   2  -6  -1   39.80    6.00
   2   6  -1   51.69    4.00
  -2   6   1   63.49    7.00
   2   6  -1   53.09    4.50
  -2   6   1   52.69    6.60
  -2   6   1   52.09    3.80
   2   6  -1   56.09    4.20
   1  -6  -1   55.09    6.40
  -1  -6   1   74.39    5.10
  -1  -6   1   68.89    5.00
  -1  -6   1   70.39    5.00
   1  -6  -1   66.39    7.10
  -1  -6   1   66.69    3.80
   1  -6  -1   81.79    7.20
  -1   6   1   81.19    7.40
   1   6  -1   70.89    4.60
   1   6  -1   62.29    5.50
   1   6  -1   64.89    5.20
  -1   6   1   58.29    6.20
   0  -6   1   14.10    3.40
   0  -6  -1   10.50    2.80
   0  -6   1   20.10    3.40
   0  -6   1   13.50    1.60
   0  -6  -1   10.00    3.00
   0  -6  -1   12.50    3.60
   0  -6  -1   13.90    3.80
   0  -6   1   13.30    3.10
   0   6  -1   13.10    3.30
   0   6  -1   12.80    3.30
   0   6  -1   20.10    3.10
   0   6   1   12.30    3.20
   0   6   1   12.20    3.20
   1  -6   1    4.10    2.50
  -1  -6  -1    1.20    2.00
  -1  -6  -1    7.50    2.50
  -1  -6  -1    3.10    2.10
  -1  -6  -1    5.40    2.70
   1  -6   1    4.40    3.20
  -1  -6  -1    4.40    2.20
  -1   6  -1   -0.40    2.30
  -1   6  -1    3.50    2.70
   1   6   1    0.20    2.00
  -1   6  -1    9.10    3.10
   1   6   1    2.50    2.20
   2  -6   1   23.40    4.90
  -2  -6  -1   18.70    3.60
  -2  -6  -1   18.40    2.90
   2  -6   1   15.30    3.60
  -2  -6  -1   19.90    3.20
  -2  -6  -1   20.40    3.10
  -2  -6  -1   19.90    3.50
   2   6   1   25.00    3.60
   2   6   1   18.90    3.30
  -2   6  -1   20.30    4.40
  -2   6  -1   19.10    4.10
  -2   6  -1   24.80    4.40
  -3  -6  -1  156.28    7.60
  -3  -6  -1  150.18    8.20
   3  -6   1  162.28   10.80
  -3  -6  -1  157.28    7.80
  -3  -6  -1  150.48    9.00
  -3  -6  -1  160.18    8.60
  -3   6  -1  141.89   10.00
  -3   6  -1  166.88    9.90
   3   6   1  169.08    8.20
   3   6   1  153.58    8.00
  -3   6  -1  154.88   10.20
  -4  -6  -1  109.39    6.70
  -4  -6  -1  106.79    6.90
  -4  -6  -1  108.49    8.50
  -4  -6  -1  116.99    8.20
  -4  -6  -1  110.59    6.10
  -4  -6  -1  101.29    6.00
   4  -6   1  125.79   11.10
  -4   6  -1  119.09   10.80
  -4   6  -1  124.19   11.10
  -4   6  -1  112.59    8.10
  -4   6  -1  113.29    8.90
  -4   6  -1   95.59    9.50
   4   6   1  103.99    6.20
   4   6   1  114.59    6.60
  -5  -6  -1    9.70    2.70
   5  -6   1   -1.00    3.60
  -5  -6  -1    7.40    2.10
  -5  -6  -1    7.50    3.70
  -5  -6  -1    4.80    2.00
  -5  -6  -1    9.20    2.50
  -5   6  -1   12.00    4.70
   5   6   1    5.60    2.20
  -5   6  -1   11.90    4.00
  -5   6  -1   10.00    3.90
  -5   6  -1    6.10    2.90
  -6  -6  -1   43.70    5.10
   6  -6   1   44.30    7.60
  -6  -6  -1   39.70    4.50
  -6  -6  -1   37.20    4.20
  -6  -6  -1   37.20    4.80
  -6  -6  -1   36.90    6.70
   6   6   1   40.60    4.90
  -6   6  -1   37.20    6.00
  -6   6  -1   44.30    7.10
  -6   6  -1   40.70    7.40
  -6   6  -1   57.99    8.00
  -7  -6  -1   10.30    2.90
  -7  -6  -1    4.90    2.40
   7  -6   1   -1.20    3.70
  -7  -6  -1    9.90    3.00
  -7  -6  -1    3.30    4.00
  -7   6  -1    5.00    4.20
  -7   6  -1    8.10    4.30
  -7   6  -1   10.50    4.80
  -7   6  -1    2.90    4.30
  -8  -6  -1   11.40    3.30
   8  -6   1   15.60    5.80
  -8  -6  -1   11.90    3.30
  -8  -6  -1    9.60    3.20
  -8   6  -1    8.10    4.50
  -8   6  -1   10.70    6.40
  -8   6  -1   13.80    5.70
  -9  -6  -1    9.90    3.70
  -9  -6  -1    5.90    3.20
   9  -6   1   11.10    6.20
  -9  -6  -1   13.30    3.60
  -9   6  -1    8.40    4.90
  -9   6  -1    8.70    6.30
  -9   6  -1   11.20    6.10
 -10  -6  -1   -2.70    2.70
  10  -6   1   -3.80    5.60
 -10  -6  -1    1.50    3.00
 -10  -6  -1    0.30    2.60
 -10   6  -1    2.00    4.20
 -10   6  -1    3.30    5.40
 -10   6  -1    5.70    6.10
 -11  -6  -1    7.40    4.20
 -11  -6  -1   14.80    4.90
  11  -6   1    8.50    7.40
 -11  -6  -1    7.80    3.90
 -11   6  -1   18.00    8.70
 -11   6  -1    9.10    6.80
  12  -6   1    0.60    6.20
 -12  -6  -1   12.20    5.10
 -12  -6  -1   -1.20    3.60
 -12   6  -1    6.80    7.80
 -12   6  -1    2.40    6.60
 -13  -6  -1    6.50    4.90
 -13   6  -1   -3.90    7.40
  12  -7  -1    3.60    7.90
 -12  -7   1   16.20    4.90
 -12  -7   1   26.50    6.10
 -12   7   1   23.20    9.40
 -11  -7   1   10.70    4.10
 -11  -7   1   21.60    5.00
  11  -7  -1   24.40    8.40
 -11   7   1   12.20    7.20
 -10  -7   1   67.29    7.00
  10  -7  -1   65.29   11.50
 -10  -7   1   65.39    7.00
 -10   7   1   80.89   12.30
 -10   7   1   49.70   10.20
 -10   7   1   75.69   10.30
  -9  -7   1    0.80    2.30
   9  -7  -1    6.50    5.20
  -9   7   1    3.40    5.00
  -9   7   1    7.80    5.00
  -9   7   1    2.90    5.20
  -8  -7   1   60.39   10.20
   8  -7  -1   73.69   11.30
  -8  -7   1   58.29    4.20
  -8  -7   1   58.49    4.60
  -8   7   1   74.19    9.60
  -8   7   1   56.79    9.90
  -8   7   1   70.09    9.80
  -7  -7   1  108.99    5.60
  -7  -7   1  132.49   14.00
  -7  -7   1  103.79    5.40
   7  -7  -1  103.49   12.10
  -7   7   1  109.39   11.30
  -7   7   1   95.19   11.80
  -7   7   1   92.99   10.90
  -7   7   1  124.79   12.20
   6  -7  -1    2.10    4.30
  -6  -7   1    3.50    1.60
  -6  -7   1    6.00    1.70
  -6  -7   1    9.00    4.60
  -6   7   1    7.00    3.60
  -6   7   1    3.50    3.50
  -6   7   1    2.30    3.50
  -6   7   1    2.70    3.60
  -5  -7   1   28.60    3.10
  -5  -7   1   28.60    3.10
  -5  -7   1   26.00    6.20
   5  -7  -1   36.80    7.20
  -5   7   1   37.80    7.10
  -5   7   1   20.60    4.50
  -5   7   1   35.30    6.00
   5   7  -1   32.10    3.20
  -5   7   1   20.40    5.10
  -4  -7   1  344.17   12.90
  -4  -7   1  364.16   12.90
  -4  -7   1  354.56   14.30
  -4  -7   1  343.07   18.20
  -4  -7   1  369.66   14.20
   4  -7  -1  371.76   19.10
  -4   7   1  394.76   19.20
  -4   7   1  362.26   15.50
  -4   7   1  362.26   18.10
  -4   7   1  345.07   17.70
   4   7  -1  351.26   13.60
  -3  -7   1  799.02   27.40
  -3  -7   1  820.22   28.70
  -3  -7   1  797.52   27.30
   3  -7  -1  790.72   32.50
  -3  -7   1  818.02   28.90
   3   7  -1  789.82   27.90
   3   7  -1  763.62   27.80
   3   7  -1  768.62   27.80
  -3   7   1  798.62   27.60
  -3   7   1  786.52   32.30
  -3   7   1  803.22   31.90
  -3   7   1  764.92   31.50
  -2  -7   1   95.89    6.00
  -2  -7   1  108.09    5.10
  -2  -7   1  112.79    6.20
   2  -7  -1   91.79    8.80
   2  -7  -1  106.79    8.10
  -2  -7   1  106.09    6.70
  -2  -7   1   94.29    6.80
   2   7  -1  106.29    6.40
  -2   7   1  103.79    5.50
  -2   7   1   91.99    8.80
  -2   7   1   96.99    9.20
   2   7  -1  111.19    6.00
   2   7  -1  105.99    6.40
  -1  -7   1   69.69    4.00
  -1  -7   1   73.89    5.50
  -1  -7   1   57.49    5.60
   1  -7  -1   72.49    6.80
   1  -7  -1   69.99    7.90
  -1  -7   1   74.39    5.50
   1  -7  -1   63.09    7.00
  -1   7   1   71.89    7.70
  -1   7   1   81.09    7.90
   1   7  -1   80.59    6.70
   1   7  -1   76.19    4.90
   1   7  -1   77.49    6.60
   0  -7  -1   95.59    7.20
   0  -7   1  104.09    7.10
   0  -7   1  105.79    4.50
   0  -7  -1  110.49    8.20
   0  -7  -1   99.09    7.20
   0  -7   1   95.99    6.90
   0  -7   1   98.69    7.40
   0  -7  -1   97.29    7.50
   0   7  -1  103.49    6.40
   0   7  -1  104.29    7.30
   0   7   1   97.59    7.50
   0   7   1  116.79    7.80
   0   7  -1  109.59    7.70
   1  -7   1   28.10    4.80
   1  -7   1   24.00    4.00
  -1  -7  -1   36.40    4.30
   1  -7   1   24.40    4.00
  -1  -7  -1   22.90    3.60
  -1  -7  -1   34.70    4.60
  -1  -7  -1   37.00    4.60
  -1  -7  -1   26.30    4.70
  -1   7  -1   36.60    5.20
  -1   7  -1   29.60    5.00
   1   7   1   22.60    4.00
   1   7   1   39.90    4.90
  -1   7  -1   26.30    4.30
  -2  -7  -1    2.40    2.30
  -2  -7  -1    0.60    1.70
  -2  -7  -1    1.20    2.50
   2  -7   1    1.60    2.50
  -2  -7  -1    1.20    1.90
   2  -7   1    0.00    3.00
  -2  -7  -1   -0.40    1.80
   2   7   1    2.70    2.30
  -2   7  -1   -0.10    2.60
   2   7   1    0.50    2.10
  -2   7  -1    1.60    2.60
  -2   7  -1   -1.80    2.40
  -3  -7  -1    0.90    2.30
  -3  -7  -1    5.50    2.80
  -3  -7  -1    2.70    1.90
  -3  -7  -1    2.90    1.80
  -3  -7  -1   -1.00    1.70
   3  -7   1   -0.30    3.00
   3   7   1    1.60    2.00
   3   7   1    6.10    2.30
  -3   7  -1    0.70    3.10
  -3   7  -1    0.00    2.60
  -3   7  -1    4.00    3.20
  -4  -7  -1  401.46   16.00
  -4  -7  -1  413.16   16.20
  -4  -7  -1  409.66   17.20
  -4  -7  -1  420.56   19.60
  -4  -7  -1  413.36   18.20
  -4  -7  -1  393.56   16.90
   4  -7   1  372.26   20.00
   4   7   1  400.26   16.30
  -4   7  -1  449.26   20.10
  -4   7  -1  425.96   18.10
  -4   7  -1  413.66   20.40
  -4   7  -1  373.66   19.20
   4   7   1  408.36   16.50
  -4   7  -1  386.56   19.20
   5  -7   1  114.49   12.20
  -5  -7  -1  109.69    6.40
  -5  -7  -1  103.19   10.50
  -5  -7  -1   96.29    6.60
  -5  -7  -1   91.19    6.10
  -5  -7  -1   92.39    6.80
  -5   7  -1   82.89    8.70
  -5   7  -1  120.39   11.80
   5   7   1   93.79    6.40
  -5   7  -1   85.29    9.40
  -5   7  -1  101.49   11.20
   6  -7   1    5.20    4.70
  -6  -7  -1    3.40    2.00
  -6  -7  -1    4.30    2.20
  -6  -7  -1    0.50    3.70
  -6  -7  -1   -1.00    2.00
   6   7   1    3.70    2.50
  -6   7  -1    6.30    4.00
  -6   7  -1    1.10    3.60
  -6   7  -1    2.00    3.30
  -6   7  -1   -2.10    3.80
  -7  -7  -1  103.69    7.30
  -7  -7  -1  112.89   12.30
  -7  -7  -1   98.29    7.10
  -7  -7  -1  123.19    7.50
   7  -7   1  103.99   12.50
  -7   7  -1   92.69   11.10
  -7   7  -1  109.79   11.90
  -7   7  -1   90.59   10.60
  -8  -7  -1  219.58   11.50
  -8  -7  -1  215.18   11.60
   8  -7   1  208.18   18.80
  -8  -7  -1  212.78   11.70
  -8   7  -1  241.48   17.10
  -8   7  -1  214.08   15.50
  -8   7  -1  215.88   15.10
  -9  -7  -1    4.50    3.00
  -9  -7  -1    2.50    2.80
   9  -7   1    6.90    6.20
  -9  -7  -1   -1.20    2.30
  -9   7  -1    0.40    4.90
  -9   7  -1    1.80    5.40
  -9   7  -1   -0.80    3.40
 -10  -7  -1   22.90    5.20
  10  -7   1   13.00    7.30
 -10  -7  -1   22.50    4.90
 -10  -7  -1   11.70    3.90
 -10   7  -1   20.60    7.50
 -10   7  -1   17.50    7.30
 -10   7  -1   29.30    7.10
 -11  -7  -1   31.70    6.10
 -11  -7  -1   16.50    5.00
  11  -7   1   15.70    7.80
 -11   7  -1   22.40    8.60
 -11   7  -1   24.20    8.80
  12  -7   1    4.40    6.80
 -12  -7  -1   -1.80    3.20
 -12  -7  -1    4.20    4.20
 -12   7  -1   -8.40    6.30
 -12   7  -1    2.00    7.20
 -12  -8   1   69.39    8.70
  12  -8  -1   60.29   12.80
 -12  -8   1   58.59    7.70
 -12   8   1   75.59   13.70
 -11  -8   1    1.50    3.20
 -11  -8   1   -0.30    2.80
  11  -8  -1   -6.80    6.00
 -11   8   1    9.20    7.10
 -10  -8   1   19.50    4.20
 -10  -8   1   13.20    3.40
  10  -8  -1   18.00    8.50
 -10   8   1   32.00    7.20
 -10   8   1    7.50    5.90
 -10   8   1   17.80    8.00
  -9  -8   1  175.98    9.90
  -9  -8   1  197.28    9.90
   9  -8  -1  217.08   19.80
  -9   8   1  214.68   19.80
  -9   8   1  180.68   17.20
  -9   8   1  192.08   14.70
   8  -8  -1  134.69   15.50
  -8  -8   1  121.59    7.10
  -8  -8   1  131.79    7.10
  -8  -8   1  135.29   14.80
  -8   8   1  123.29   14.10
  -8   8   1  147.29   14.40
  -8   8   1  123.49   12.90
  -7  -8   1  131.99   14.90
   7  -8  -1  149.49   15.60
  -7  -8   1  123.09    6.20
  -7  -8   1  124.09    6.40
  -7  -8   1  122.49    6.30
  -7   8   1  113.99   12.20
  -7   8   1  153.98   13.50
  -7   8   1  117.69   13.80
   6  -8  -1  151.38   15.30
  -6  -8   1  121.59    6.00
  -6  -8   1  110.39   12.20
  -6  -8   1  120.49    5.90
  -6  -8   1  127.49    6.40
  -6   8   1  113.19   12.60
  -6   8   1  145.49   10.20
  -6   8   1   99.69   10.80
  -5  -8   1  378.46   14.40
  -5  -8   1  381.96   15.30
   5  -8  -1  397.56   21.60
  -5  -8   1  392.96   21.00
  -5  -8   1  385.06   14.30
  -5  -8   1  392.56   15.60
  -5   8   1  374.96   19.80
  -5   8   1  411.26   17.70
   5   8  -1  389.46   15.10
  -5   8   1  379.96   20.10
  -5   8   1  394.36   21.00
  -4  -8   1   22.50    2.90
  -4  -8   1   25.80    3.50
  -4  -8   1   28.50    3.90
  -4  -8   1   24.20    3.10
   4  -8  -1   17.20    5.70
   4   8  -1   27.70    4.00
  -4   8   1   31.20    6.60
   4   8  -1   30.00    3.70
  -4   8   1   18.20    5.10
  -4   8   1   15.40    4.90
  -4   8   1   28.60    4.40
  -3  -8   1   -1.70    1.50
  -3  -8   1   -2.10    1.90
  -3  -8   1    1.10    1.70
  -3  -8   1   -0.70    1.50
   3  -8  -1    1.00    3.50
  -3   8   1   -0.40    1.70
   3   8  -1    0.60    1.70
   3   8  -1    1.70    1.70
  -3   8   1   -5.20    2.10
  -3   8   1    2.10    3.20
   3   8  -1   -2.10    1.70
  -2  -8   1   95.19    6.20
  -2  -8   1   95.59    5.30
  -2  -8   1   91.39    7.10
   2  -8  -1   77.09    8.90
  -2  -8   1   87.89    6.10
   2  -8  -1  108.49    9.60
  -2   8   1   88.89    5.10
   2   8  -1   81.09    6.20
   2   8  -1   84.09    6.20
   2   8  -1   88.89    5.40
  -2   8   1   89.59    9.30
  -2   8   1   83.49    8.90
  -1  -8   1   -0.30    1.20
  -1  -8   1    1.20    2.20
  -1  -8   1    3.50    2.10
  -1  -8   1    2.60    1.90
   1  -8  -1    0.90    3.00
   1  -8  -1    3.20    3.60
   1  -8  -1    0.20    2.60
  -1   8   1   -1.00    2.70
   1   8  -1    0.00    2.00
   1   8  -1    0.90    2.40
  -1   8   1    2.20    3.00
   1   8  -1    3.30    1.90
   0  -8  -1   10.90    3.20
   0  -8   1   13.50    1.90
   0  -8   1   13.00    3.10
   0  -8   1   11.20    3.30
   0  -8  -1    9.90    3.60
   0  -8  -1    9.70    3.00
   0  -8  -1   10.90    3.70
   0  -8   1   14.00    3.70
   0   8  -1   13.90    3.10
   0   8  -1   14.00    4.00
   0   8  -1   16.90    4.00
   0   8   1   16.40    3.90
   0   8   1    8.80    3.40
  -1  -8  -1  140.89    8.70
   1  -8   1  145.49    9.30
  -1  -8  -1  144.79    9.60
  -1  -8  -1  146.59    8.80
   1  -8   1  135.99    9.70
  -1  -8  -1  134.79    8.50
  -1  -8  -1  125.19    7.50
   1  -8   1  132.99    9.00
   1   8   1  133.19    8.80
  -1   8  -1  136.69    9.70
  -1   8  -1  144.19    9.60
  -1   8  -1  129.39    8.30
   1   8   1  146.19    8.90
  -2  -8  -1  669.03   25.50
   2  -8   1  671.13   28.60
  -2  -8  -1  681.93   25.90
  -2  -8  -1  685.13   25.20
  -2  -8  -1  631.04   26.60
  -2  -8  -1  667.93   24.70
   2  -8   1  684.33   27.50
   2   8   1  680.73   26.10
  -2   8  -1  694.93   28.30
  -2   8  -1  695.83   26.50
   2   8   1  665.43   26.20
  -2   8  -1  634.34   27.60
  -3  -8  -1  194.58   10.10
   3  -8   1  180.78   12.90
  -3  -8  -1  204.28    9.90
   3  -8   1  182.98   11.90
  -3  -8  -1  186.78   10.80
  -3  -8  -1  207.38   10.80
  -3   8  -1  199.68   12.00
  -3   8  -1  210.28   12.60
   3   8   1  183.08   10.00
   3   8   1  181.58   10.10
  -3   8  -1  192.28   12.70
  -4  -8  -1    4.60    2.40
  -4  -8  -1    2.60    2.00
  -4  -8  -1    3.20    3.10
   4  -8   1   -1.40    3.50
  -4  -8  -1    5.20    2.10
  -4  -8  -1    1.50    2.40
  -4   8  -1    4.40    3.70
  -4   8  -1    3.30    3.90
   4   8   1    1.00    2.00
  -4   8  -1    3.60    2.90
  -4   8  -1    5.10    4.00
  -4   8  -1    4.60    3.40
   4   8   1   -1.10    2.00
  -5  -8  -1  159.08    9.30
  -5  -8  -1  164.38    8.80
   5  -8   1  168.28   13.20
  -5  -8  -1  142.99   11.50
  -5  -8  -1  166.78    8.70
  -5   8  -1  163.58   12.20
   5   8   1  160.58    9.00
  -5   8  -1  161.98   10.60
  -5   8  -1  131.89   13.00
   6  -8   1   75.79   10.70
  -6  -8  -1   66.39    6.50
  -6  -8  -1   70.69    6.50
  -6  -8  -1   63.69    6.10
  -6  -8  -1   76.49   10.30
  -6   8  -1   77.99   10.70
  -6   8  -1   70.09    8.90
  -6   8  -1   73.49    9.50
  -7  -8  -1   -1.50    1.80
  -7  -8  -1    2.10    2.70
   7  -8   1   -0.40    4.60
  -7  -8  -1    4.70    5.00
  -7  -8  -1    2.30    2.40
  -7   8  -1   -5.00    4.10
  -7   8  -1    3.50    4.30
  -7   8  -1    4.90    4.10
  -8  -8  -1   48.40    9.30
  -8  -8  -1   52.79    6.00
  -8  -8  -1   30.00    5.00
   8  -8   1   37.90    8.90
  -8  -8  -1   53.29    6.30
  -8   8  -1   46.40    8.80
  -8   8  -1   54.59    9.30
  -8   8  -1   61.49   10.80
  -9  -8  -1  154.58   10.20
  -9  -8  -1  160.08    9.60
   9  -8   1  170.28   17.50
  -9  -8  -1  143.79    9.90
  -9   8  -1  132.49   15.70
  -9   8  -1  165.68   15.50
  -9   8  -1  142.49   15.60
  10  -8   1   -0.50    6.20
 -10  -8  -1   13.00    4.10
 -10  -8  -1   11.10    4.10
 -10   8  -1   11.90    7.00
 -10   8  -1   24.70    7.40
 -10   8  -1   13.40    7.30
 -11  -8  -1    5.70    3.90
  11  -8   1    3.30    7.80
 -11  -8  -1    6.40    4.50
 -11   8  -1    2.50    6.40
 -11   8  -1   13.30    7.60
 -12  -8  -1    5.90    4.60
 -12  -8  -1    7.30    4.30
  12  -8   1    5.70    7.20
 -12   8  -1    3.30    7.50
 -12   8  -1    7.90    7.80
 -12  -9   1    5.00    3.80
  12  -9  -1    9.70    7.90
 -12  -9   1    4.70    3.60
 -12   9   1   -1.70    6.60
 -11  -9   1   -1.50    2.70
  11  -9  -1   -2.30    6.00
 -11  -9   1   -1.30    2.80
 -11   9   1   -3.60    5.80
 -10  -9   1    6.90    3.00
 -10  -9   1    6.20    3.20
  10  -9  -1    4.60    6.60
 -10   9   1   27.60    8.80
 -10   9   1    9.10    6.10
 -10   9   1    5.60    5.30
   9  -9  -1    4.10    6.20
  -9  -9   1   10.40    3.00
  -9  -9   1    9.60    2.90
  -9  -9   1   13.70    7.40
  -9   9   1    6.70    5.70
  -9   9   1   12.40    7.60
  -9   9   1   11.20    5.90
   8  -9  -1   -6.60    4.90
  -8  -9   1   -2.70    4.70
  -8  -9   1    0.40    1.90
  -8  -9   1    1.00    1.90
  -8   9   1    4.30    4.90
  -8   9   1    2.10    4.40
  -8   9   1   -3.20    4.50
  -7  -9   1    1.80    4.80
  -7  -9   1    0.80    1.70
  -7  -9   1   -0.60    1.70
  -7  -9   1   -0.90    1.70
   7  -9  -1   -1.30    4.40
  -7   9   1   -5.10    3.80
  -7   9   1    2.00    4.60
  -7   9   1    3.30    3.90
  -6  -9   1  467.05   18.60
  -6  -9   1  512.35   18.70
  -6  -9   1  506.55   19.20
   6  -9  -1  468.65   26.10
  -6  -9   1  535.95   26.50
  -6   9   1  519.05   22.50
  -6   9   1  524.65   26.70
  -6   9   1  509.65   25.00
  -5  -9   1   30.00    6.80
  -5  -9   1   33.70    3.90
  -5  -9   1   37.50    3.90
   5  -9  -1   16.80    5.80
  -5  -9   1   38.50    4.50
  -5   9   1   26.50    6.70
  -5   9   1   22.30    6.00
  -5   9   1   19.10    4.50
   5   9  -1   30.20    4.60
  -4  -9   1   22.70    3.80
  -4  -9   1   13.10    2.70
  -4  -9   1   17.60    3.20
  -4  -9   1   15.40    2.90
   4  -9  -1   22.30    6.30
  -4   9   1   18.70    5.40
   4   9  -1   20.80    3.50
   4   9  -1   22.00    3.70
  -4   9   1   20.50    5.70
  -4   9   1   17.60    3.80
   3  -9  -1   83.19    8.90
  -3  -9   1   91.99    6.20
  -3  -9   1   70.99    5.80
  -3  -9   1   76.29    7.00
   3  -9  -1   88.29   10.30
  -3  -9   1   80.99    7.40
  -3   9   1   80.59    5.60
  -3   9   1   86.49   10.40
   3   9  -1   85.89    7.30
   3   9  -1   84.19    5.60
  -3   9   1   94.89   10.40
   3   9  -1   77.59    5.80
  -2  -9   1   34.20    4.10
   2  -9  -1   42.70    7.00
  -2  -9   1   32.50    5.30
   2  -9  -1   32.20    5.60
   2  -9  -1   42.40    6.90
  -2  -9   1   32.60    4.70
  -2  -9   1   41.70    5.00
  -2   9   1   42.20    6.70
   2   9  -1   46.90    4.50
   2   9  -1   40.10    5.20
  -2   9   1   34.90    6.60
   2   9  -1   39.10    5.20
  -1  -9   1   67.49    6.70
  -1  -9   1   59.69    3.90
   1  -9  -1   82.79    8.50
  -1  -9   1   71.39    7.10
  -1  -9   1   63.99    6.60
   1  -9  -1   69.19    8.10
   1  -9  -1   56.99    7.80
   1  -9  -1   57.59    7.40
  -1   9   1   60.69    7.80
   1   9  -1   65.39    6.90
   1   9  -1   58.59    6.50
  -1   9   1   78.09    8.60
   1   9  -1   61.69    4.80
   0  -9   1  148.49   10.10
   0  -9  -1  171.28   11.50
   0  -9   1  154.08    9.90
   0  -9  -1  165.08   10.70
   0  -9   1  158.78    6.60
   0  -9  -1  161.08   10.30
   0  -9  -1  178.58   10.70
   0  -9   1  173.48   10.40
   0   9  -1  166.28    8.90
   0   9  -1  172.78   10.70
   0   9   1  160.38   10.60
   0   9  -1  185.38   10.90
   0   9   1  174.88   11.00
  -1  -9  -1   25.30    4.50
   1  -9   1   39.30    6.10
  -1  -9  -1   25.60    4.00
  -1  -9  -1   25.60    4.30
  -1  -9  -1   30.30    4.80
  -1  -9  -1   30.10    5.50
   1  -9   1   24.60    4.50
   1  -9   1   24.10    4.70
  -1   9  -1   32.10    4.90
  -1   9  -1   24.40    5.20
   1   9   1   19.20    4.40
   1   9   1   19.00    4.40
  -1   9  -1   27.00    5.20
  -2  -9  -1   14.20    3.30
   2  -9   1   10.20    4.30
  -2  -9  -1   15.30    3.50
  -2  -9  -1    5.30    3.40
  -2  -9  -1   21.40    3.90
   2  -9   1   12.30    4.10
  -2  -9  -1   11.60    3.20
  -2   9  -1   15.20    4.50
  -2   9  -1   17.70    4.20
   2   9   1   21.60    4.30
   2   9   1   18.80    3.90
  -2   9  -1    9.40    4.50
   3  -9   1   25.50    5.20
  -3  -9  -1   29.10    5.20
   3  -9   1   21.40    5.60
  -3  -9  -1   36.10    5.20
  -3  -9  -1   28.00    5.00
  -3  -9  -1   36.60    4.80
  -3   9  -1   27.00    5.70
   3   9   1   36.90    4.90
  -3   9  -1   33.70    6.20
  -3   9  -1   34.50    6.00
   3   9   1   30.40    4.80
  -4  -9  -1    6.00    2.50
  -4  -9  -1    4.30    3.00
   4  -9   1    4.50    4.90
  -4  -9  -1    1.30    2.30
  -4  -9  -1    5.00    3.00
  -4   9  -1    9.20    4.20
  -4   9  -1   11.10    4.60
  -4   9  -1    5.30    3.20
  -4   9  -1    2.80    3.60
   4   9   1    5.60    2.70
  -5  -9  -1   37.50    7.70
  -5  -9  -1   51.09    5.70
  -5  -9  -1   55.19    5.70
   5  -9   1   33.10    7.90
  -5  -9  -1   42.80    5.60
   5   9   1   56.49    6.10
  -5   9  -1   37.00    7.60
  -5   9  -1   56.89    7.20
  -5   9  -1   45.90    8.20
  -6  -9  -1    2.80    2.60
  -6  -9  -1    0.10    1.90
   6  -9   1   -3.10    4.40
  -6  -9  -1    2.80    3.70
  -6  -9  -1   -2.70    1.90
  -6   9  -1   -0.10    3.60
  -6   9  -1    0.40    4.30
  -6   9  -1   -2.90    3.50
   7  -9   1   63.69   10.70
  -7  -9  -1   47.80    5.70
  -7  -9  -1   51.39    6.20
  -7  -9  -1   55.99    6.30
  -7  -9  -1   41.50    8.60
  -7   9  -1   57.69    9.00
  -7   9  -1   35.00    7.80
  -7   9  -1   71.59   10.80
  -8  -9  -1    4.50    2.70
  -8  -9  -1    6.20    2.90
  -8  -9  -1    6.70    3.20
   8  -9   1    3.10    6.00
  -8  -9  -1    8.90    5.80
  -8   9  -1   13.30    6.50
  -8   9  -1    9.20    6.00
  -8   9  -1    2.90    4.70
  -9  -9  -1   30.90    5.50
  -9  -9  -1   36.00    5.10
  -9  -9  -1   29.00    5.30
   9  -9   1    8.80    7.00
  -9   9  -1   43.50    9.00
  -9   9  -1   27.50    7.80
  -9   9  -1   33.00    9.30
 -10  -9  -1    0.70    3.00
  10  -9   1    1.90    6.00
 -10  -9  -1    3.10    3.30
 -10   9  -1    4.20    5.90
 -10   9  -1   -4.70    5.40
 -10   9  -1    2.10    5.20
 -11  -9  -1   -3.90    3.40
  11  -9   1    3.30    7.00
 -11  -9  -1    6.30    4.30
 -11   9  -1    9.20    7.20
 -11   9  -1   -4.90    5.40
 -11   9  -1   -0.40    6.80
  12  -9   1    7.80    8.30
 -12  -9  -1   -0.60    4.00
 -12  -9  -1    3.80    4.50
 -12   9  -1   -2.10    8.00
 -12   9  -1   13.90    8.60
  12 -10  -1   34.00   11.90
 -12 -10   1   34.60    6.20
 -12 -10   1   33.30    6.30
 -12  10   1   58.89   13.50
 -11 -10   1   -1.20    3.00
 -11 -10   1    1.70    3.40
  11 -10  -1   -3.50    6.10
 -11  10   1    0.40    6.90
 -11  10   1   -3.80    5.40
 -10 -10   1   22.10    4.50
 -10 -10   1   19.90    4.20
  10 -10  -1   24.30    9.60
 -10  10   1   27.90    8.00
 -10  10   1   22.00    7.80
 -10  10   1   24.40    8.70
  -9 -10   1  205.38   10.90
   9 -10  -1  168.58   18.70
  -9 -10   1  232.48   22.30
  -9 -10   1  213.68   10.90
  -9  10   1  250.37   23.00
  -9  10   1  201.58   18.60
  -9  10   1  195.68   17.70
  -8 -10   1   80.39   13.00
   8 -10  -1   67.79   12.30
  -8 -10   1   70.59    6.40
  -8 -10   1   84.29    6.10
  -8  10   1  102.69   11.90
  -8  10   1   73.89   12.40
  -8  10   1   58.59   10.30
  -7 -10   1   30.20    8.00
  -7 -10   1   17.90    3.30
   7 -10  -1   18.70    7.70
  -7 -10   1   24.60    3.70
  -7 -10   1   18.60    3.10
  -7  10   1   22.50    5.80
  -7  10   1   28.00    7.40
  -7  10   1   24.80    7.70
   6 -10  -1    8.60    5.40
  -6 -10   1    3.70    2.20
  -6 -10   1    5.70    2.30
  -6 -10   1    0.10    4.60
  -6 -10   1   11.20    3.10
  -6  10   1    9.50    5.20
  -6  10   1   11.00    4.40
  -6  10   1    9.60    4.70
  -5 -10   1  218.28   10.60
  -5 -10   1  229.18   10.70
  -5 -10   1  199.28   11.00
   5 -10  -1  232.28   16.50
  -5 -10   1  197.38   15.10
  -5  10   1  226.68   15.00
  -5  10   1  184.88   14.70
  -5  10   1  220.88   12.00
  -4 -10   1    1.80    2.30
   4 -10  -1    6.20    4.30
  -4 -10   1    4.40    2.60
  -4 -10   1    1.50    2.00
  -4  10   1    5.20    2.80
  -4  10   1    1.10    3.60
  -4  10   1    0.00    3.80
   4  10  -1    8.00    3.10
   3 -10  -1   69.99    9.80
  -3 -10   1   60.59    6.90
  -3 -10   1   68.49    6.50
  -3 -10   1   62.29    6.60
  -3  10   1   71.39    5.40
  -3  10   1   55.69    8.00
  -3  10   1   68.79    9.00
   3  10  -1   71.39    7.00
   3  10  -1   71.09    5.10
  -2 -10   1   -1.80    2.10
   2 -10  -1    1.00    3.50
  -2 -10   1    0.90    1.80
  -2 -10   1    3.00    2.50
   2 -10  -1    3.60    4.20
  -2 -10   1    2.60    3.00
   2 -10  -1   -0.20    3.00
  -2  10   1    1.50    3.30
   2  10  -1    2.40    1.90
   2  10  -1   -0.20    2.40
   2  10  -1    7.00    3.10
  -2  10   1    0.10    3.10
  -1 -10   1  323.27   15.30
  -1 -10   1  320.47   15.40
   1 -10  -1  305.07   16.20
   1 -10  -1  314.17   16.10
  -1 -10   1  281.87   11.30
   1 -10  -1  297.57   17.30
  -1 -10   1  304.47   14.60
   1 -10  -1  308.37   16.80
  -1  10   1  294.67   16.40
   1  10  -1  317.47   15.40
   1  10  -1  298.37   13.00
   1  10  -1  304.87   15.40
  -1  10   1  290.37   16.20
   0 -10  -1   24.40    5.20
   0 -10  -1   32.50    4.30
   0 -10  -1   25.80    4.80
   0 -10   1   18.40    4.60
   0 -10   1   33.60    3.00
   0 -10  -1   38.60    6.30
   0 -10   1   26.50    5.20
   0 -10  -1   27.20    6.10
   0 -10   1   31.70    5.40
   0  10  -1   34.60    4.80
   0  10  -1   29.50    5.50
   0  10   1   32.20    5.90
   0  10   1   27.80    5.40
   0  10  -1   27.50    5.40
   1 -10   1  310.67   16.60
  -1 -10  -1  299.27   16.40
  -1 -10  -1  288.17   15.30
   1 -10   1  304.07   16.20
  -1 -10  -1  316.87   15.40
  -1 -10  -1  321.17   13.60
   1 -10   1  292.87   16.00
  -1 -10  -1  309.47   15.50
  -1  10  -1  319.07   14.70
  -1  10  -1  288.37   16.40
   1  10   1  310.97   15.70
   1  10   1  313.87   15.90
  -1  10  -1  326.97   16.80
  -2 -10  -1  576.54   22.10
   2 -10   1  582.04   26.40
   2 -10   1  574.44   25.50
  -2 -10  -1  575.34   24.00
  -2 -10  -1  591.14   25.30
  -2 -10  -1  602.14   23.80
  -2 -10  -1  591.44   23.10
   2  10   1  549.95   24.00
  -2  10  -1  540.45   23.60
  -2  10  -1  582.24   26.30
  -2  10  -1  503.75   25.20
   2  10   1  580.34   24.20
  -3 -10  -1  122.09    8.70
  -3 -10  -1  131.69    8.90
  -3 -10  -1  139.09    7.20
  -3 -10  -1  133.89    8.80
   3 -10   1  110.39   11.90
   3 -10   1  128.99   12.70
  -3 -10  -1  126.59    9.60
  -3  10  -1  106.79   10.80
  -3  10  -1  139.99   13.40
  -3  10  -1  156.18   14.10
   3  10   1  132.79    9.20
  -4 -10  -1   -1.90    2.60
  -4 -10  -1   -2.20    1.80
  -4 -10  -1    1.40    2.60
   4 -10   1    7.50    4.50
  -4 -10  -1    1.20    2.10
  -4  10  -1   -0.80    3.10
   4  10   1    1.80    2.60
  -4  10  -1   -0.50    3.40
  -4  10  -1   -5.40    3.10
  -4  10  -1    3.30    3.20
  -5 -10  -1   80.19   10.80
  -5 -10  -1   83.79    7.80
   5 -10   1   95.79   12.50
  -5 -10  -1   94.29    8.80
  -5 -10  -1   83.29    7.70
   5  10   1  102.19    7.80
  -5  10  -1  106.99   10.20
  -5  10  -1   79.49   10.70
  -5  10  -1   82.99   10.50
  -6 -10  -1  264.87   13.60
  -6 -10  -1  274.27   14.00
  -6 -10  -1  269.47   17.60
  -6 -10  -1  248.08   13.20
   6 -10   1  266.57   19.10
  -6  10  -1  275.37   17.50
  -6  10  -1  271.07   15.70
  -6  10  -1  283.07   18.60
  -7 -10  -1  206.08   11.80
  -7 -10  -1  233.08   12.00
   7 -10   1  186.38   18.80
  -7 -10  -1  211.78   16.40
  -7 -10  -1  204.78   11.60
  -7  10  -1  202.18   15.70
  -7  10  -1  203.28   14.50
  -7  10  -1  208.88   16.80
  -8 -10  -1  107.29   14.20
   8 -10   1   73.19   13.20
  -8 -10  -1   97.59    9.10
  -8 -10  -1  106.39    7.70
  -8 -10  -1   98.89    9.10
  -8  10  -1  101.99   12.30
  -8  10  -1   95.19   14.00
  -8  10  -1   88.69   13.10
  -9 -10  -1   58.89    7.20
  -9 -10  -1   64.99    7.60
   9 -10   1   67.39   12.70
  -9 -10  -1   45.80   10.30
  -9  10  -1   64.19   10.70
  -9  10  -1   97.59   14.80
  -9  10  -1   42.50    9.70
 -10 -10  -1    3.60    3.70
  10 -10   1   19.90    8.00
 -10 -10  -1    9.10    4.10
 -10  10  -1   20.10    8.10
 -10  10  -1   21.10    8.50
 -10  10  -1   10.30    7.00
 -11 -10  -1   -0.90    3.50
  11 -10   1   -4.90    6.80
 -11 -10  -1   -0.10    3.50
 -11  10  -1   -0.20    7.40
 -11  10  -1    7.20    7.00
 -11  10  -1   -0.50    6.10
  12 -10   1   18.40    9.80
 -12 -10  -1   11.40    5.30
 -12 -10  -1   15.40    5.80
 -12  10  -1   17.30    9.30
 -12  10  -1   11.60    9.30
 -11 -11   1   10.50    4.10
 -11 -11   1   10.10    3.80
  11 -11  -1    2.50    8.20
 -11  11   1    5.60    7.00
 -11  11   1   12.40    8.50
  10 -11  -1   81.39   14.70
 -10 -11   1   79.29    7.70
 -10 -11   1   71.99    7.70
 -10 -11   1   77.69   14.00
 -10  11   1   80.49   12.60
 -10  11   1   70.39   13.40
  -9 -11   1   32.00    5.00
  -9 -11   1   28.10    9.40
   9 -11  -1    5.10    6.50
  -9 -11   1   16.80    3.90
  -9  11   1   32.10    8.80
  -9  11   1   27.50    9.40
  -8 -11   1    8.00    3.10
   8 -11  -1    5.10    6.30
  -8 -11   1   20.30    8.50
  -8 -11   1    6.80    2.80
   8 -11  -1    4.30    6.30
  -8  11   1   15.90    7.70
  -8  11   1   26.20    7.90
  -7 -11   1  116.69    7.10
   7 -11  -1   97.49   13.80
  -7 -11   1  148.09   16.90
  -7 -11   1  115.89    7.90
  -7 -11   1  128.59    8.10
  -7  11   1  129.69   14.70
  -7  11   1  134.89   15.60
  -6 -11   1   86.09    6.70
  -6 -11   1  120.09   14.50
   6 -11  -1   53.99   10.10
  -6 -11   1   79.79    7.00
  -6 -11   1   87.49    6.80
  -6  11   1   83.39   12.50
  -6  11   1   81.99   11.20
  -5 -11   1   45.40    5.80
  -5 -11   1   41.00    5.10
   5 -11  -1   41.70    8.40
  -5 -11   1   59.39   10.20
  -5 -11   1   50.39    6.00
  -5  11   1   58.99   10.00
  -5  11   1   57.99    9.60
   4 -11  -1   24.90    6.80
   4 -11  -1   17.90    5.80
  -4 -11   1   31.20    4.80
  -4 -11   1   27.90    4.70
  -4 -11   1   22.70    4.80
  -4  11   1   34.00    7.00
   4  11  -1   25.40    4.90
  -4  11   1   24.20    6.20
  -3 -11   1  622.14   26.60
  -3 -11   1  667.13   25.60
   3 -11  -1  630.44   29.80
  -3 -11   1  571.14   25.10
   3 -11  -1  592.24   29.70
  -3  11   1  641.04   29.10
  -3  11   1  631.24   29.60
   3  11  -1  646.64   25.70
  -2 -11   1  283.77   15.20
  -2 -11   1  271.27   14.20
  -2 -11   1  265.17   14.10
  -2 -11   1  264.47   12.50
   2 -11  -1  257.27   16.70
   2 -11  -1  289.37   16.10
   2 -11  -1  261.57   16.40
  -2  11   1  276.67   16.30
   2  11  -1  255.07   14.00
   2  11  -1  251.67   11.40
  -2  11   1  245.68   16.00
   1 -11  -1    9.20    4.60
   1 -11  -1   11.20    4.30
  -1 -11   1    9.40    3.80
   1 -11  -1    7.50    4.60
  -1 -11   1   10.90    3.50
  -1 -11   1    6.90    1.90
   1 -11  -1    5.10    3.30
  -1 -11   1    5.60    3.20
  -1 -11   1   15.00    4.70
   1  11  -1    6.30    2.60
   1  11  -1    3.50    3.40
   1  11  -1    3.50    3.00
  -1  11   1    5.90    3.90
  -1  11   1    5.50    3.80
   0 -11   1  290.57   16.10
   0 -11  -1  330.17   16.80
   0 -11   1  319.37   16.70
   0 -11   1  322.57   16.50
   0 -11  -1  333.27   17.10
   0 -11  -1  317.17   13.60
   0 -11  -1  288.27   16.50
   0 -11  -1  303.77   17.70
   0 -11   1  316.57   11.40
   0  11   1  303.57   17.00
   0  11  -1  300.67   16.50
   0  11  -1  295.17   14.10
   0  11  -1  301.47   16.70
   0  11   1  342.07   17.20
  -1 -11  -1   66.69    7.90
   1 -11   1   89.79    9.80
  -1 -11  -1   65.69    6.40
  -1 -11  -1   71.99    7.80
  -1 -11  -1   62.89    7.60
   1 -11   1   53.19    7.20
   1 -11   1   68.09    9.00
  -1 -11  -1   68.09    8.80
  -1  11  -1   75.09    9.10
   1  11   1   68.09    8.20
  -1  11  -1   67.79    7.50
  -1  11  -1   87.19    9.60
   1  11   1   72.09    8.40
  -2 -11  -1   15.70    4.40
  -2 -11  -1   13.80    3.70
  -2 -11  -1   10.80    4.30
  -2 -11  -1   14.60    4.00
   2 -11   1    5.90    3.90
   2 -11   1    8.80    5.00
  -2 -11  -1   16.50    3.50
  -2  11  -1   12.00    5.10
   2  11   1   16.70    4.60
   2  11   1    9.00    3.90
  -2  11  -1   16.80    5.10
  -2  11  -1    7.40    3.70
  -3 -11  -1  135.09   10.30
   3 -11   1  127.99   13.60
  -3 -11  -1  124.49    8.60
  -3 -11  -1  120.39    9.10
  -3 -11  -1  123.19    9.10
  -3 -11  -1  124.69    7.20
  -3  11  -1  149.99   12.80
  -3  11  -1  101.89   11.50
   3  11   1  130.59    9.50
  -3  11  -1  137.19   13.80
   4 -11   1  297.87   19.30
  -4 -11  -1  309.57   16.20
  -4 -11  -1  333.37   15.60
  -4 -11  -1  310.97   15.60
  -4 -11  -1  314.27   15.60
  -4  11  -1  276.07   18.20
   4  11   1  308.67   15.50
  -4  11  -1  312.07   18.60
  -4  11  -1  287.07   15.00
  -4  11  -1  291.27   17.40
  -5 -11  -1   46.90    6.30
  -5 -11  -1   48.30    6.60
   5 -11   1   56.19   10.70
  -5 -11  -1   35.00    7.90
  -5 -11  -1   43.70    6.00
  -5  11  -1   47.20    8.70
  -5  11  -1   41.70    6.50
  -5  11  -1   31.70    7.70
  -6 -11  -1   36.20    8.40
  -6 -11  -1   34.60    5.60
  -6 -11  -1   38.50    5.60
  -6 -11  -1   38.70    5.90
   6 -11   1   40.70    9.20
  -6  11  -1   46.40    7.70
  -6  11  -1   31.50    8.10
  -6  11  -1   37.80    8.70
  -7 -11  -1   54.49    7.00
  -7 -11  -1   51.19   10.00
  -7 -11  -1   69.89    7.50
   7 -11   1   92.19   14.30
  -7 -11  -1   68.89    7.50
  -7  11  -1   67.09   10.90
  -7  11  -1   51.39    8.70
  -7  11  -1   63.09   10.70
  -8 -11  -1  221.48   12.90
  -8 -11  -1  228.08   13.00
  -8 -11  -1  224.08   20.90
   8 -11   1  199.58   20.70
  -8 -11  -1  239.28   12.40
  -8  11  -1  189.68   20.20
  -8  11  -1  209.88   15.90
  -8  11  -1  189.68   18.70
  -9 -11  -1   -1.50    5.70
   9 -11   1   10.20    7.70
  -9 -11  -1    0.50    3.10
  -9 -11  -1    0.70    2.80
  -9  11  -1  -12.60    5.10
  -9  11  -1    3.60    5.60
  -9  11  -1    7.10    6.30
  10 -11   1    4.30    7.90
 -10 -11  -1   -3.10    3.00
 -10 -11  -1    2.10    3.70
 -10  11  -1    3.00    6.40
 -10  11  -1    4.40    6.60
 -10  11  -1    0.90    7.20
  11 -11   1  155.98   21.70
 -11 -11  -1  116.19   12.00
 -11 -11  -1  115.39   11.50
 -11  11  -1  159.98   18.30
 -11  11  -1  115.99   17.60
 -11 -12   1    3.80    3.30
  11 -12  -1   -7.90    5.60
 -11 -12   1    4.60    3.40
 -11  12   1   -1.20    6.80
 -11  12   1   -1.60    7.10
 -10 -12   1   -0.40    2.80
  10 -12  -1   11.80    8.70
 -10 -12   1    2.20    7.50
 -10 -12   1   -0.60    2.90
 -10  12   1    6.00    6.80
 -10  12   1   -6.70    6.00
  -9 -12   1    4.00    2.90
  -9 -12   1   -5.00    5.40
  -9 -12   1    4.60    3.00
   9 -12  -1    6.10    6.80
  -9  12   1    2.70    6.40
  -9  12   1   -1.70    6.30
   8 -12  -1   -8.90    5.40
  -8 -12   1   -0.40    2.70
   8 -12  -1   -2.50    5.80
  -8 -12   1   -1.00    2.50
  -8 -12   1  -10.70    4.40
  -8  12   1   -4.60    5.30
  -8  12   1   10.80    7.30
  -7 -12   1    1.60    2.30
  -7 -12   1   -0.90    2.60
   7 -12  -1    2.00    5.00
   7 -12  -1   -4.10    5.10
  -7 -12   1    0.50    2.40
  -7 -12   1    5.50    5.60
  -7  12   1    3.20    5.90
  -7  12   1   -1.40    5.20
   6 -12  -1   17.00    7.50
  -6 -12   1   39.80    5.50
  -6 -12   1   32.80    5.20
   6 -12  -1   40.10    9.20
  -6 -12   1   24.10    7.80
  -6 -12   1   30.40    4.90
  -6  12   1   25.00    7.20
  -6  12   1   14.00    6.70
  -5 -12   1   19.80    4.30
  -5 -12   1   10.60    3.70
   5 -12  -1   30.20    8.10
   5 -12  -1    9.40    6.30
  -5 -12   1   25.00    4.50
  -5  12   1   19.60    6.20
  -5  12   1   19.20    7.00
  -4 -12   1    7.60    3.50
   4 -12  -1   22.20    7.40
  -4 -12   1    8.40    3.90
  -4 -12   1   10.70    3.60
   4 -12  -1    8.00    5.80
  -4  12   1   15.00    6.10
  -4  12   1    2.70    4.30
   3 -12  -1   12.50    5.70
  -3 -12   1   15.40    4.20
   3 -12  -1    5.40    5.60
  -3 -12   1   11.80    4.60
  -3 -12   1   19.80    4.70
  -3  12   1   12.10    5.50
  -3  12   1   10.50    5.30
   3  12  -1   13.20    4.40
  -2 -12   1    8.00    3.40
  -2 -12   1   -1.70    3.60
   2 -12  -1    4.90    4.90
  -2 -12   1    4.40    3.40
   2 -12  -1    3.50    4.20
  -2 -12   1    2.90    2.60
  -2  12   1   12.90    5.10
  -2  12   1    3.60    3.90
   2  12  -1    6.00    3.30
  -1 -12   1    8.00    3.50
  -1 -12   1   22.50    5.60
   1 -12  -1   10.40    4.50
  -1 -12   1   20.90    4.90
  -1 -12   1   12.50    5.00
  -1 -12   1   15.20    2.50
   1 -12  -1   25.40    6.20
   1 -12  -1   20.60    6.00
   1  12  -1   17.70    4.70
   1  12  -1   15.70    4.90
  -1  12   1   11.20    4.90
   1  12  -1   16.20    3.60
  -1  12   1   26.40    6.00
   0 -12   1    1.50    3.30
   0 -12   1    5.10    3.70
   0 -12  -1   16.50    5.00
   0 -12   1   11.70    4.20
   0 -12  -1    8.90    2.80
   0 -12  -1    9.60    4.40
   0 -12  -1   18.90    5.70
   0  12  -1    4.10    3.70
   0  12  -1    6.70    3.10
   0  12  -1    0.60    3.50
   0  12   1    8.60    4.40
   0  12   1   11.40    4.70
   1 -12   1   38.60    7.10
  -1 -12  -1   40.30    5.10
   1 -12   1   42.10    7.50
  -1 -12  -1   23.70    6.20
  -1 -12  -1   33.10    5.80
  -1 -12  -1   31.00    6.00
  -1 -12  -1   28.80    5.50
  -1  12  -1   32.10    5.70
  -1  12  -1   40.60    7.40
  -1  12  -1   20.40    5.80
   1  12   1   37.30    6.80
   1  12   1   46.30    7.20
   2 -12   1    4.00    4.10
  -2 -12  -1   -0.90    3.20
  -2 -12  -1   -1.50    2.40
  -2 -12  -1   -1.20    2.90
  -2 -12  -1    1.20    2.50
  -2 -12  -1    1.70    2.30
  -2  12  -1    1.20    3.70
   2  12   1    7.30    4.10
  -2  12  -1   -3.90    3.10
  -2  12  -1    5.80    4.60
  -3 -12  -1   17.70    4.80
  -3 -12  -1   18.70    4.20
   3 -12   1   18.70    6.90
  -3 -12  -1   13.80    3.10
  -3 -12  -1   20.20    5.40
  -3 -12  -1   22.80    5.00
  -3  12  -1   20.50    5.80
  -3  12  -1   16.40    6.20
  -3  12  -1   15.60    5.20
   3  12   1   11.90    4.50
   4 -12   1   22.00    7.20
  -4 -12  -1   33.70    5.90
  -4 -12  -1   26.90    5.40
  -4 -12  -1   29.80    6.10
  -4 -12  -1   34.30    5.90
  -4  12  -1   39.10    6.60
  -4  12  -1   33.10    7.30
   4  12   1   35.30    6.40
  -4  12  -1   47.20    8.70
  -5 -12  -1   35.80    6.00
  -5 -12  -1   36.50    6.20
  -5 -12  -1   41.10    6.50
   5 -12   1   35.50    9.30
  -5  12  -1   31.30    8.50
  -5  12  -1   19.90    6.80
   6 -12   1   13.00    7.10
  -6 -12  -1    2.10    3.40
  -6 -12  -1    3.00    3.40
  -6 -12  -1    7.80    6.10
  -6 -12  -1    5.40    3.30
  -6  12  -1    2.90    6.30
  -6  12  -1    5.10    4.80
  -7 -12  -1   10.50    6.20
   7 -12   1   11.80    6.70
  -7 -12  -1    6.60    3.30
  -7 -12  -1    7.70    4.00
  -7 -12  -1   10.20    4.20
  -7  12  -1    2.80    5.10
  -7  12  -1   14.20    7.60
  -8 -12  -1    5.60    3.40
  -8 -12  -1    9.30    6.30
  -8 -12  -1    7.50    3.90
   8 -12   1   13.70    7.70
  -8 -12  -1   14.80    4.40
  -8  12  -1    9.20    7.20
  -8  12  -1   10.80    7.70
  -9 -12  -1    0.30    6.30
  -9 -12  -1   -0.80    3.00
   9 -12   1   -3.50    6.50
  -9 -12  -1    0.80    3.40
  -9  12  -1   -1.00    6.60
  -9  12  -1   -4.80    6.00
 -10 -12  -1    3.80    4.00
 -10 -12  -1    5.60    4.20
  10 -12   1    2.60    7.30
 -10  12  -1   -6.00    6.20
 -10  12  -1    4.00    6.60
 -11 -12  -1    1.60    3.70
  11 -12   1    5.60    8.40
 -11 -12  -1    4.80    4.30
 -11  12  -1    3.80    7.50
 -11  12  -1    2.70    7.10
  10 -13  -1   54.09   13.00
 -10 -13   1   34.90    6.30
 -10 -13   1   31.60    5.80
 -10 -13   1   37.40   11.40
 -10  13   1   49.40   11.40
 -10  13   1   44.20   11.60
  -9 -13   1    0.70    3.20
  -9 -13   1   -3.40    5.60
  -9 -13   1    0.70    3.00
   9 -13  -1    0.30    6.40
  -9  13   1   12.20    8.20
  -9  13   1    3.60    7.10
  -8 -13   1    4.00    3.30
   8 -13  -1    3.10    6.20
  -8 -13   1    2.70    7.00
  -8 -13   1   15.20    4.20
   8 -13  -1    6.70    7.40
  -8  13   1    9.00    7.50
  -8  13   1   10.60    7.10
  -7 -13   1   77.29    8.40
  -7 -13   1   85.49    7.60
  -7 -13   1   58.49   11.90
   7 -13  -1  106.89   15.90
   7 -13  -1   47.30   11.10
  -7 -13   1   74.79    8.00
  -7  13   1   77.19   13.60
  -7  13   1   64.39   11.70
   6 -13  -1   -1.90    5.40
   6 -13  -1    3.40    6.40
  -6 -13   1   18.30    7.70
  -6 -13   1   10.20    3.70
  -6 -13   1    6.30    3.30
  -6 -13   1    8.70    4.10
  -6  13   1   -4.30    4.40
  -6  13   1    5.50    6.50
  -5 -13   1   11.50    4.30
   5 -13  -1   23.40    8.30
   5 -13  -1   12.90    6.30
  -5 -13   1    7.90    3.90
  -5 -13   1    1.90    2.90
  -5  13   1    6.80    5.20
  -5  13   1   16.90    7.10
   4 -13  -1    5.80    5.90
  -4 -13   1   -0.20    3.10
  -4 -13   1   -1.40    3.40
   4 -13  -1    4.40    6.00
  -4 -13   1    2.30    2.90
  -4  13   1    7.80    4.80
  -4  13   1    2.80    4.80
  -3 -13   1   36.30    6.80
   3 -13  -1   31.10    8.00
  -3 -13   1   42.20    6.50
  -3 -13   1   48.80    7.00
   3 -13  -1   56.49    9.70
  -3  13   1   42.70    8.40
  -3  13   1   51.59    9.30
   3  13  -1   58.09    8.10
  -2 -13   1   53.29    8.50
  -2 -13   1   58.29    8.20
  -2 -13   1   78.09    7.40
  -2 -13   1   47.20    7.20
   2 -13  -1   63.79   10.60
   2 -13  -1   54.49    9.60
  -2  13   1   53.09    9.20
   2  13  -1   43.10    7.30
  -2  13   1   69.89   10.30
   1 -13  -1   48.80    9.20
   1 -13  -1   51.79    8.40
  -1 -13   1   47.50    8.30
  -1 -13   1   35.60    6.20
  -1 -13   1   51.19    7.70
  -1 -13   1   40.30    6.80
   1 -13  -1   37.00    7.50
  -1  13   1   41.50    7.90
   1  13  -1   44.40    7.30
  -1  13   1   42.50    8.00
   0 -13   1   91.69   10.00
   0 -13  -1   90.79   11.50
   0 -13  -1   69.99    7.00
   0 -13   1   71.09    9.90
   0 -13  -1   84.49   10.00
   0 -13   1   96.79   10.20
   0 -13  -1   61.59    8.70
   0  13   1   66.49    9.50
   0  13   1   91.29   11.10
   0  13  -1   93.19    8.40
   0  13  -1   93.59   10.70
   0  13  -1   85.99   10.50
  -1 -13  -1   24.50    4.20
  -1 -13  -1   30.20    6.30
  -1 -13  -1   28.60    5.70
  -1 -13  -1   30.50    7.00
   1 -13   1   28.90    6.80
   1 -13   1   28.40    6.60
  -1  13  -1   22.30    6.00
   1  13   1   35.50    7.40
  -1  13  -1   24.70    5.30
  -1  13  -1   25.30    6.30
  -2 -13  -1   -1.10    2.40
  -2 -13  -1    0.90    2.30
  -2 -13  -1   -1.30    3.20
  -2 -13  -1   -4.30    2.50
  -2 -13  -1   -2.50    3.50
   2 -13   1   -0.80    4.00
   2  13   1   -1.50    3.60
  -2  13  -1   -6.40    3.90
  -2  13  -1    2.30    3.70
  -2  13  -1   -1.50    3.50
  -3 -13  -1   30.30    6.60
  -3 -13  -1   40.90    7.00
   3 -13   1   21.60    7.10
  -3 -13  -1   28.40    5.20
  -3 -13  -1   37.10    6.70
   3  13   1   40.80    7.20
  -3  13  -1   43.40    8.00
  -3  13  -1   33.90    7.70
  -3  13  -1   45.90    9.00
  -4 -13  -1   84.39    9.10
  -4 -13  -1   79.09    9.70
  -4 -13  -1   91.79    9.60
   4 -13   1   69.89   10.90
  -4 -13  -1   91.69    9.70
  -4  13  -1   96.99   13.00
  -4  13  -1   71.09   11.00
   4  13   1  100.29   10.60
  -5 -13  -1   19.30    5.20
  -5 -13  -1   16.40    4.70
   5 -13   1   15.10    7.20
  -5 -13  -1   17.60    5.20
  -5  13  -1    6.70    5.20
  -5  13  -1   18.30    6.70
  -6 -13  -1    1.50    3.30
  -6 -13  -1    1.40    5.10
   6 -13   1    1.30    5.90
  -6 -13  -1    0.10    3.50
  -6 -13  -1    0.80    3.10
  -6  13  -1   -1.90    5.10
  -6  13  -1   -0.90    5.10
  -7 -13  -1   12.80    4.40
  -7 -13  -1   35.30    6.30
   7 -13   1   23.50    9.20
  -7 -13  -1   24.40    5.70
  -7 -13  -1   23.00    8.20
  -7  13  -1   37.80    9.90
  -7  13  -1   19.70    7.90
  -8 -13  -1    5.80    7.30
  -8 -13  -1   18.90    5.00
  -8 -13  -1   20.80    5.60
   8 -13   1    6.30    7.90
  -8 -13  -1   18.80    5.50
  -8  13  -1   15.40    8.50
  -8  13  -1   18.40    7.80
  -9 -13  -1   13.00    8.10
  -9 -13  -1   15.80    5.10
  -9 -13  -1   10.70    4.60
   9 -13   1   19.30    9.60
  -9  13  -1   20.60    9.10
  -9  13  -1   23.50   10.30
 -10 -13  -1   -2.20    3.80
 -10 -13  -1    5.20    8.20
 -10 -13  -1    2.20    4.40
  10 -13   1   -9.10    7.70
 -10  13  -1    0.10    7.30
 -10  13  -1   -3.20    6.60
 -10 -14   1    0.90    7.30
 -10 -14   1   14.80    4.80
 -10 -14   1   13.40    4.40
  10 -14  -1    5.70    8.60
 -10  14   1   14.90    9.90
 -10  14   1    8.80    8.50
  -9 -14   1   50.99    7.30
  -9 -14   1   72.79    8.30
   9 -14  -1   14.70    9.40
  -9 -14   1   54.59   13.00
  -9  14   1   39.70   12.30
  -9  14   1   59.69   13.10
   8 -14  -1   12.10    9.20
  -8 -14   1   23.00    5.20
  -8 -14   1   38.60   11.50
   8 -14  -1   24.70    9.90
  -8 -14   1   24.10    5.50
  -8  14   1   36.20   10.40
  -8  14   1   45.00   11.90
   7 -14  -1    2.50    6.70
  -7 -14   1    7.30    3.70
  -7 -14   1   -0.50    5.80
  -7 -14   1    7.30    3.90
   7 -14  -1   -3.60    6.70
  -7  14   1    8.40    7.50
  -7  14   1   11.50    6.80
   6 -14  -1    4.40    7.30
  -6 -14   1   17.20    5.20
  -6 -14   1   12.80    4.40
  -6 -14   1    8.20    4.10
  -6 -14   1   -1.30    5.60
   6 -14  -1   -2.60    5.50
  -6  14   1   16.30    8.10
  -6  14   1    3.30    5.90
   5 -14  -1  176.98   19.00
   5 -14  -1  211.48   20.40
  -5 -14   1  193.88   12.60
  -5 -14   1  197.58   13.20
  -5 -14   1  181.88   12.60
  -5  14   1  199.38   19.60
  -5  14   1  210.28   20.30
  -4 -14   1    8.00    4.30
  -4 -14   1    6.50    4.50
   4 -14  -1    0.50    6.40
   4 -14  -1   10.80    6.70
  -4 -14   1    7.90    4.10
  -4  14   1   11.40    6.60
  -4  14   1   18.30    6.60
   3 -14  -1   19.80    7.10
  -3 -14   1   14.60    4.90
   3 -14  -1   17.70    7.30
  -3 -14   1   25.70    6.00
  -3 -14   1   27.70    6.50
  -3  14   1   26.30    7.30
   3  14  -1    5.30    4.30
  -3  14   1    4.00    4.90
  -2 -14   1   43.40    7.70
   2 -14  -1   56.89   10.20
  -2 -14   1   38.70    7.20
   2 -14  -1   39.60    8.50
  -2 -14   1   47.80    8.30
  -2  14   1   49.60    9.40
  -2  14   1   48.10    8.80
   2  14  -1   45.80    7.90
  -1 -14   1  208.88   14.50
  -1 -14   1  204.18   12.80
  -1 -14   1  202.68   15.00
   1 -14  -1  195.58   15.00
   1 -14  -1  191.68   18.00
  -1  14   1  217.48   15.50
  -1  14   1  230.88   16.10
   1  14  -1  201.58   14.40
   0 -14  -1   20.40    6.80
   0 -14   1   52.09    7.90
   0 -14  -1   34.60    7.00
   0 -14   1   37.80    7.60
   0 -14  -1   39.70    7.50
   0 -14   1   43.10    8.50
   0  14   1   30.50    7.00
   0  14  -1   46.30    8.00
  -1 -14  -1   85.69    9.80
   1 -14   1   95.29   11.60
   1 -14   1   83.69   11.60
  -1 -14  -1   85.89   10.40
  -1 -14  -1   81.99   11.30
   1  14   1  103.09   12.10
  -1  14  -1   84.19   11.40
  -1  14  -1   92.89   11.60
  -2 -14  -1  340.87   20.10
   2 -14   1  318.57   20.40
  -2 -14  -1  341.27   17.20
  -2 -14  -1  349.37   19.40
  -2  14  -1  341.57   21.00
  -2  14  -1  360.26   21.10
   2  14   1  342.57   19.40
  -2  14  -1  360.46   18.50
  -3 -14  -1   67.89   10.30
  -3 -14  -1   77.09    9.60
  -3 -14  -1   77.29    9.50
   3 -14   1   63.19   10.60
  -3  14  -1   73.69   11.00
   3  14   1   92.09   10.70
  -3  14  -1   67.09   10.20
  -4 -14  -1   21.60    5.50
  -4 -14  -1   37.20    7.00
   4 -14   1   24.10    7.70
  -4 -14  -1   19.10    6.20
  -4  14  -1   22.90    7.20
  -4  14  -1   28.50    7.80
   5 -14   1    9.20    6.90
  -5 -14  -1    6.60    4.10
  -5 -14  -1    7.40    4.20
  -5 -14  -1    5.00    4.60
  -5  14  -1    4.40    5.80
  -5  14  -1   10.20    6.00
   6 -14   1   39.90    9.90
  -6 -14  -1   42.80    7.00
  -6 -14  -1   43.60    7.50
  -6 -14  -1   34.10    9.70
  -6 -14  -1   49.90    7.80
  -6  14  -1   32.60    8.90
  -6  14  -1   53.39   10.80
  -7 -14  -1   -2.10    3.30
  -7 -14  -1    6.20    4.40
  -7 -14  -1   11.80    5.00
  -7 -14  -1   -3.00    5.70
   7 -14   1   -6.50    5.50
  -7  14  -1    5.80    6.10
  -7  14  -1    3.30    6.50
   8 -14   1   16.70    8.80
  -8 -14  -1   10.50    7.50
  -8 -14  -1   11.80    4.80
  -8 -14  -1   10.90    5.20
  -8  14  -1    9.80    8.40
  -8  14  -1    7.00    6.70
  -9 -14  -1   47.10    7.80
  -9 -14  -1   44.90   12.00
   9 -14   1   78.99   15.20
  -9 -14  -1   37.10    7.10
  -9  14  -1   41.00   11.60
  -9  14  -1   54.59   13.10
  10 -14   1   58.89   14.60
 -10 -14  -1   65.19    9.20
 -10 -14  -1   42.30   12.00
 -10 -14  -1   66.39    9.50
 -10  14  -1   60.09   13.90
 -10  14  -1   65.59   13.70
   9 -15  -1   20.30    9.50
  -9 -15   1   24.40   11.10
  -9 -15   1   18.50    5.70
  -9 -15   1   19.70    5.50
  -9  15   1   20.70   10.00
  -9  15   1    0.60    8.80
  -8 -15   1    4.60    3.80
   8 -15  -1    2.40    7.70
  -8 -15   1    4.50    3.80
   8 -15  -1   13.70    7.90
  -8 -15   1   -5.30    6.10
  -8  15   1    3.00    7.00
  -8  15   1    8.90    7.30
  -7 -15   1    7.90    4.50
  -7 -15   1   11.10    8.00
   7 -15  -1    4.50    7.60
   7 -15  -1    0.90    7.40
  -7 -15   1    2.00    3.60
  -7  15   1    5.30    7.60
  -7  15   1    8.40    7.40
   6 -15  -1   34.90    9.80
  -6 -15   1   39.50   10.90
   6 -15  -1   28.90   10.40
  -6 -15   1   35.20    6.50
  -6 -15   1   43.80    6.90
  -6 -15   1   34.40    6.90
  -6  15   1   28.80    9.00
  -6  15   1   45.40   11.50
  -5 -15   1   42.50    7.50
  -5 -15   1   28.60    6.70
   5 -15  -1   27.10    9.20
  -5 -15   1   28.80    6.10
   5 -15  -1   29.00   10.00
  -5  15   1   26.30    9.30
  -5  15   1   25.20    8.50
  -4 -15   1    8.10    4.20
  -4 -15   1    2.40    3.50
  -4 -15   1   -0.70    4.30
   4 -15  -1   -4.20    4.90
   4 -15  -1   -6.20    5.00
  -4  15   1   10.50    5.80
  -4  15   1   -3.40    4.60
   3 -15  -1    0.90    5.70
   3 -15  -1   -6.00    4.80
  -3 -15   1    1.90    4.30
  -3 -15   1    0.10    3.70
  -3  15   1    1.90    5.00
  -3  15   1    2.30    4.90
  -2 -15   1   19.70    5.80
  -2 -15   1    4.00    4.60
   2 -15  -1   12.60    6.30
   2 -15  -1   10.80    6.80
  -2  15   1    3.00    5.00
   2  15  -1   13.40    5.60
  -2  15   1   17.00    6.60
  -1 -15   1   10.40    5.50
  -1 -15   1   10.50    5.80
   1 -15  -1    9.20    5.80
   1 -15  -1    3.90    5.40
  -1 -15   1    7.00    3.90
  -1  15   1    9.70    5.60
   1  15  -1    4.10    4.40
   0 -15  -1    6.90    4.70
   0 -15   1    9.00    5.40
   0 -15  -1    7.40    5.30
   0 -15   1    9.40    5.80
   0 -15   1    6.10    4.70
   0  15   1   12.70    5.90
   0  15  -1   14.10    5.60
  -1 -15  -1    2.20    4.70
  -1 -15  -1   -3.40    3.70
  -1 -15  -1   -0.90    3.40
   1 -15   1    3.10    4.50
   1 -15   1   -0.30    5.20
  -1  15  -1    2.00    4.70
   1  15   1   -4.80    3.70
   2 -15   1   -0.10    4.30
  -2 -15  -1    2.60    4.50
  -2 -15  -1    5.10    4.80
   2 -15   1    1.00    4.90
  -2  15  -1   -1.40    4.60
   2  15   1   -0.50    4.00
  -2  15  -1    3.30    5.20
   3 -15   1   17.40    7.60
  -3 -15  -1   29.40    6.60
  -3 -15  -1   30.10    7.50
  -3  15  -1   30.70    8.20
   3  15   1   25.20    7.10
  -3  15  -1   19.70    6.80
  -4 -15  -1   18.10    6.10
   4 -15   1   30.00    8.70
  -4 -15  -1   23.10    7.10
  -4  15  -1   18.60    7.00
  -4  15  -1   26.30    8.20
   5 -15   1   -0.70    5.00
  -5 -15  -1    4.10    4.30
  -5 -15  -1    3.40    3.80
  -5 -15  -1    2.00    4.50
  -5  15  -1    7.00    6.50
  -5  15  -1   -3.00    4.80
  -6 -15  -1    4.50    4.30
  -6 -15  -1    7.40    5.10
  -6 -15  -1    2.00    4.20
   6 -15   1   13.40    8.30
  -6 -15  -1    7.30    7.10
  -6  15  -1   10.10    6.80
  -6  15  -1    9.60    6.80
  -7 -15  -1   13.10    4.90
   7 -15   1    6.50    8.00
  -7 -15  -1   12.70    5.30
  -7 -15  -1   10.30    7.60
  -7 -15  -1   15.90    5.30
  -7  15  -1    6.60    7.00
  -7  15  -1   10.00    8.20
  -8 -15  -1    0.40    4.30
   8 -15   1    6.30    8.40
  -8 -15  -1    8.10    7.60
  -8 -15  -1    3.50    4.70
  -8  15  -1   -3.00    7.30
  -8  15  -1   12.10    7.60
   9 -15   1   15.70    9.50
  -9 -15  -1    4.40    4.40
  -9 -15  -1    6.60    5.30
  -9 -15  -1   16.60    9.10
  -9  15  -1    1.90    7.40
  -9  15  -1    0.80    7.90
  -9 -16   1   25.70    6.60
   9 -16  -1   33.70   12.30
  -9 -16   1   41.70   12.90
  -9 -16   1   38.20    7.30
  -9  16   1   24.80   11.50
  -9  16   1   25.40   10.60
   8 -16  -1   25.90   11.00
  -8 -16   1   30.30    6.70
  -8 -16   1   11.40    5.00
  -8 -16   1   13.70    9.00
   8 -16  -1   22.70   10.50
  -8  16   1    2.00    8.00
  -8  16   1   15.10    9.20
  -7 -16   1    4.00    4.40
   7 -16  -1   -2.40    6.70
   7 -16  -1    3.90    7.40
  -7 -16   1   -2.80    6.20
  -7 -16   1    4.30    4.00
  -7  16   1   -5.10    6.50
  -7  16   1   -9.20    7.00
   6 -16  -1   25.00    9.80
  -6 -16   1   20.00    6.20
   6 -16  -1   25.30   10.30
  -6 -16   1   12.20    5.00
  -6 -16   1   45.20   11.00
  -6 -16   1   24.90    6.20
  -6  16   1   26.20    9.20
  -6  16   1   13.90    8.60
  -5 -16   1   47.10    7.80
   5 -16  -1   24.20    9.60
  -5 -16   1   43.80    7.90
   5 -16  -1   32.50    9.90
  -5  16   1   49.40   11.20
  -5  16   1   33.30   10.00
   4 -16  -1   26.40    9.20
  -4 -16   1   32.10    7.50
   4 -16  -1   35.60    9.90
  -4 -16   1   28.10    6.70
  -4  16   1   22.30    8.60
  -4  16   1   42.20    9.90
   3 -16  -1    4.00    7.10
  -3 -16   1    2.00    4.70
   3 -16  -1   -0.30    6.40
  -3 -16   1    3.40    4.40
  -3  16   1    1.40    4.90
  -3  16   1    7.10    6.50
   2 -16  -1    5.40    6.30
  -2 -16   1   26.60    7.40
   2 -16  -1    8.90    6.80
  -2 -16   1   15.40    6.10
  -2  16   1    8.30    6.30
   2  16  -1   12.70    5.70
  -1 -16   1   28.50    7.40
  -1 -16   1   14.40    6.80
   1 -16  -1   31.90    8.80
  -1 -16   1   23.20    5.60
   1 -16  -1   21.00    7.20
  -1  16   1   26.40    8.00
   1  16  -1   12.60    5.90
   0 -16  -1   21.40    6.30
   0 -16   1   11.20    5.10
   0 -16   1   13.80    6.60
   0 -16  -1   13.90    6.70
   0  16   1    8.00    6.10
   0  16  -1   10.90    6.00
   1 -16   1   25.70    8.10
  -1 -16  -1   34.00    7.40
   1 -16   1   29.40    7.40
  -1 -16  -1   32.70    7.80
  -1 -16  -1   41.50    9.50
  -1  16  -1   32.80    8.30
   1  16   1   29.40    7.70
  -2 -16  -1   46.70    8.70
   2 -16   1   31.00    9.00
   2 -16   1   47.60    9.80
  -2 -16  -1   56.29    9.90
   2  16   1   54.89    9.40
  -2  16  -1   49.30    9.50
  -3 -16  -1   -6.40    3.60
  -3 -16  -1    0.70    4.70
   3 -16   1    7.90    7.10
   3 -16   1   -0.60    5.60
   3  16   1   -2.10    3.80
  -3  16  -1   -0.70    4.90
  -3  16  -1    1.40    5.40
  -4 -16  -1    1.20    3.90
   4 -16   1    7.60    7.60
  -4 -16  -1   -0.30    4.70
   4 -16   1    2.30    6.10
  -4  16  -1   -8.50    5.20
  -4  16  -1    3.70    5.60
  -5 -16  -1   17.80    6.20
   5 -16   1   26.30    9.20
  -5 -16  -1   27.40    7.10
  -5  16  -1   28.70    9.50
  -5  16  -1    9.90    6.80
  -6 -16  -1   12.40    6.10
  -6 -16  -1   22.20    6.40
  -6 -16  -1   11.50    7.60
   6 -16   1   29.30    9.40
  -6  16  -1    6.80    6.80
  -6  16  -1    3.10    6.50
   7 -16   1    2.50    7.70
  -7 -16  -1   17.10    8.30
  -7 -16  -1   16.90    6.20
   7 -16   1   11.40    8.90
  -7 -16  -1   15.80    6.10
  -7  16  -1   13.40    7.60
  -7  16  -1   22.80    9.30
  -8 -16  -1   20.40    6.40
   8 -16   1    9.20    9.30
   8 -16   1    0.70    8.80
  -8 -16  -1   -6.10    7.10
  -8  16  -1    1.90    7.90
  -8  16  -1    2.00    7.70
  -9 -16  -1   53.39    9.00
   9 -16   1   39.70   13.20
  -9 -16  -1   35.90   11.70
  -9  16  -1   27.80   11.80
  -9  16  -1   38.50   11.80
  -8 -17   1   26.10   10.20
   8 -17  -1   22.30   11.40
  -8 -17   1   21.10    6.80
   8 -17  -1   29.70   11.30
  -8  17   1   17.20    9.70
  -8  17   1   13.80    9.30
  -7 -17   1   38.10   11.80
   7 -17  -1   44.10   12.30
   7 -17  -1   32.60   11.90
  -7 -17   1   44.60    8.20
  -7  17   1   60.99   13.00
  -7  17   1   31.80   10.80
   6 -17  -1   12.80    8.50
  -6 -17   1    9.20    5.60
  -6 -17   1    5.50    7.10
   6 -17  -1   38.20   11.00
  -6 -17   1   17.80    6.30
  -6  17   1    5.40    7.80
  -6  17   1    2.90    7.60
   5 -17  -1   -1.00    6.80
  -5 -17   1   -2.00    4.00
  -5 -17   1    4.50    5.50
   5 -17  -1   -2.40    7.40
  -5  17   1   -4.30    5.70
  -5  17   1   -1.60    5.30
   4 -17  -1  102.19   16.30
  -4 -17   1   74.19   11.00
  -4 -17   1   74.69   10.50
   4 -17  -1   78.19   14.00
  -4  17   1   48.60   11.00
  -4  17   1  108.39   15.90
  -3 -17   1  134.19   14.20
  -3 -17   1  151.18   15.70
   3 -17  -1  127.19   16.70
   3 -17  -1  140.89   18.50
  -3  17   1  139.89   16.70
   2 -17  -1   -4.40    4.90
   2 -17  -1    8.50    6.70
  -2 -17   1   -0.70    5.70
  -2 -17   1    7.70    5.50
  -2  17   1    5.30    6.00
   2  17  -1   11.20    6.20
   1 -17  -1   32.70    8.50
  -1 -17   1   23.00    8.20
   1 -17  -1   42.10   10.60
   1  17  -1   19.50    7.00
  -1  17   1   27.70    8.60
   0 -17  -1  209.28   15.60
   0 -17   1  193.18   14.60
   0 -17  -1  208.18   20.10
   0 -17   1  149.88   17.10
   0  17   1  194.48   19.50
   0  17  -1  179.18   18.00
  -1 -17  -1   29.20    8.30
   1 -17   1   48.00   10.60
   1 -17   1   32.80    7.90
   1  17   1   23.00    7.70
  -1  17  -1   12.40    6.70
   2 -17   1   16.60    6.90
  -2 -17  -1    5.50    5.60
  -2 -17  -1    6.50    4.80
   2 -17   1    5.20    7.20
   2  17   1    7.70    6.10
  -2  17  -1    6.70    6.30
   3 -17   1    1.30    7.20
  -3 -17  -1    6.40    6.40
   3 -17   1    3.80    5.90
  -3 -17  -1   -1.50    4.60
  -3  17  -1    1.50    6.50
  -4 -17  -1   62.09    9.80
   4 -17   1   42.40   10.10
   4 -17   1   72.09   13.80
  -4 -17  -1   78.79   11.60
  -4  17  -1   65.09   12.20
  -5 -17  -1   20.30    6.80
   5 -17   1   -3.80    6.30
  -5 -17  -1    1.40    4.40
   5 -17   1    8.80    9.10
  -5  17  -1    1.80    5.70
  -5  17  -1   14.20    7.50
  -6 -17  -1    6.60    5.70
   6 -17   1   10.10    8.30
   6 -17   1    5.40    8.10
  -6 -17  -1    5.10    4.70
  -6 -17  -1   11.10    7.50
  -6  17  -1    7.70    7.80
  -6  17  -1   -3.80    6.80
  -7 -17  -1   40.70    8.40
  -7 -17  -1   31.60    7.70
   7 -17   1   24.60   10.70
  -7 -17  -1   15.20    8.80
   7 -17   1   24.60   11.40
  -7  17  -1   29.60   10.60
  -7  17  -1   50.49   11.60
   8 -17   1   29.90   10.60
  -8 -17  -1   30.60    7.50
   8 -17   1   15.10   11.10
  -8 -17  -1    6.80    8.20
  -8  17  -1   18.50   10.40
  -8  17  -1   23.30   10.50
   7 -18  -1   -5.90    8.30
  -7 -18   1   -2.10    7.70
   7 -18  -1   -4.50    8.30
  -7 -18   1   -1.90    4.80
  -7  18   1   14.30    8.90
  -7  18   1    8.20    8.60
  -6 -18   1    1.60    7.10
  -6 -18   1    1.70    5.20
  -6 -18   1    3.50    5.30
   6 -18  -1   -7.40    7.60
   6 -18  -1   -8.90    7.00
  -6  18   1   22.80    9.40
  -6  18   1   -0.80    6.30
   5 -18  -1    1.90    8.00
   5 -18  -1   -6.20    7.40
  -5 -18   1    1.80    5.20
  -5 -18   1    3.20    4.80
  -5  18   1    3.10    7.40
  -5  18   1    3.60    6.70
   4 -18  -1   16.00    8.90
  -4 -18   1   18.90    7.20
  -4 -18   1   -4.70    4.30
   4 -18  -1    6.40    9.50
  -4  18   1   18.90    8.50
   3 -18  -1   -8.00    6.50
  -3 -18   1    9.10    6.00
  -3 -18   1   -0.10    5.40
   3 -18  -1   -5.90    6.70
  -3  18   1    2.20    6.60
   2 -18  -1   -1.50    6.10
  -2 -18   1   -1.20    5.60
   2 -18  -1   -3.70    6.30
  -2 -18   1    2.80    4.80
  -2  18   1   -5.60    5.00
   1 -18  -1   12.30    7.40
   1 -18  -1    2.30    5.40
  -1 -18   1    2.30    6.60
  -1  18   1   -4.60    4.60
   1  18  -1    1.00    5.10
   0 -18  -1   38.30   10.30
   0 -18  -1   49.10    9.20
   0 -18   1   35.50   10.40
   0  18   1   45.40   10.40
   0  18  -1   54.09   10.00
   1 -18   1   30.70    8.70
  -1 -18  -1   31.40    9.40
   1 -18   1   28.70   10.60
  -1  18  -1    5.60    6.50
   1  18   1   23.60    8.40
  -2 -18  -1   -4.90    5.40
   2 -18   1    1.10    6.70
   2 -18   1   -0.10    5.70
  -2  18  -1    2.70    5.60
   2  18   1    6.50    5.70
   3 -18   1   10.50    8.70
  -3 -18  -1    2.40    5.50
  -3 -18  -1    9.90    6.80
   3 -18   1    3.40    6.50
  -3  18  -1    5.10    6.80
  -4 -18  -1   -2.90    5.80
  -4 -18  -1    8.10    6.10
   4 -18   1   -1.60    7.80
   4 -18   1    3.20    7.80
  -4  18  -1    3.20    6.30
  -5 -18  -1   -3.30    4.90
  -5 -18  -1   -4.10    4.60
   5 -18   1   -1.40    7.30
   5 -18   1    3.10    8.30
  -5  18  -1    2.60    6.70
  -6 -18  -1    1.80    7.50
   6 -18   1   -2.50    8.50
  -6 -18  -1   -4.10    5.00
   6 -18   1   -5.00    7.80
  -6 -18  -1    4.90    5.40
  -6  18  -1    3.60    6.90
  -6  18  -1   17.30    8.90
   7 -18   1   -3.90    6.80
   7 -18   1   -0.30    8.40
  -7 -18  -1   -1.10    7.70
  -7 -18  -1    0.30    4.90
  -7  18  -1    0.10    7.40
  -7  18  -1   -9.00    7.80
   6 -19  -1    8.70   10.10
  -6 -19   1   16.30    7.30
  -6 -19   1   34.50   11.10
  -6 -19   1   31.10    8.60
   6 -19  -1   38.10   12.90
  -6  19   1   13.80    9.70
   5 -19  -1   -5.90    7.90
  -5 -19   1    8.20    6.00
   5 -19  -1   -8.10    7.90
  -5 -19   1    3.80    4.80
  -5  19   1   -3.00    6.70
   4 -19  -1   67.29   14.10
   4 -19  -1   75.09   14.90
  -4 -19   1   53.59   10.80
  -4 -19   1   49.50   10.40
  -4  19   1   34.80   11.60
   3 -19  -1   88.49   15.70
   3 -19  -1  101.09   15.20
  -3 -19   1   95.69   13.60
  -3 -19   1  109.29   14.40
  -3  19   1   61.19   13.30
   2 -19  -1   33.30   10.30
   2 -19  -1   19.20    8.80
  -2 -19   1    8.00    6.60
  -2  19   1    9.70    7.50
   1 -19  -1   59.49   13.30
   1 -19  -1   87.59   12.80
  -1 -19   1   62.99   12.70
  -1  19   1   55.09   11.80
   1  19  -1   68.19   12.60
   0 -19  -1   22.20    9.00
   0 -19   1    7.20    6.90
   0  19   1    7.30    7.10
   0  19  -1   12.60    6.90
  -1 -19  -1    9.20    7.30
   1 -19   1    0.60    6.70
   1 -19   1    0.20    6.10
  -1  19  -1    7.80    6.70
   1  19   1    3.60    5.70
  -2 -19  -1    5.40    6.70
   2 -19   1   -8.50    6.40
   2 -19   1    8.60    6.50
   2  19   1   10.10    7.00
  -2  19  -1    2.90    6.70
   3 -19   1   31.90   10.20
   3 -19   1   51.59   12.70
  -3 -19  -1   58.29   11.40
  -3  19  -1   43.10   11.30
  -4 -19  -1   30.10    8.90
  -4 -19  -1   41.50   10.20
   4 -19   1   25.50   10.90
   4 -19   1   33.90   12.40
  -4  19  -1   33.40   10.10
   5 -19   1    5.30    9.60
  -5 -19  -1    2.80    5.90
  -5 -19  -1    2.00    6.40
   5 -19   1    0.20    8.50
  -5  19  -1   -3.10    6.00
  -6 -19  -1   -6.10    5.70
   6 -19   1    1.50    8.20
   6 -19   1   -6.30    7.70
  -6 -19  -1    0.10    7.00
  -6 -19  -1   -1.90    5.00
  -6  19  -1    1.20    7.70
   5 -20  -1   15.70   11.20
  -5 -20   1   10.70    7.00
   5 -20  -1   11.00   10.60
  -5 -20   1   21.70    7.80
  -5  20   1   21.20    9.80
  -4 -20   1   13.80    7.40
   4 -20  -1   11.70    9.40
  -4 -20   1   22.80    8.00
   4 -20  -1   -0.40    9.40
  -4  20   1   14.80    9.40
  -3 -20   1   -4.20    6.30
   3 -20  -1    7.50    9.00
   3 -20  -1   -9.90    7.40
  -3  20   1    3.90    6.60
  -2 -20   1   47.00   11.10
   2 -20  -1   32.50   11.20
   2 -20  -1   52.79   11.00
  -2  20   1   10.70    8.10
   1 -20  -1   68.69   15.00
  -1 -20   1   82.09   14.60
   1 -20  -1   57.49   11.30
  -1  20   1   42.60   10.80
   1  20  -1   61.19   11.70
   0 -20   1   38.00   10.80
   0 -20  -1   17.00    8.80
   0  20  -1   51.39   12.10
   0  20   1   23.80    8.20
   1 -20   1   -1.00    7.00
  -1 -20  -1   20.50    8.80
   1  20   1   18.80    7.80
  -1  20  -1    5.10    7.10
   2 -20   1   60.59   14.30
  -2 -20  -1   83.29   14.40
   2 -20   1   73.49   13.40
  -2  20  -1   46.80   11.60
  -3 -20  -1   14.60    8.20
   3 -20   1   15.80    9.80
   3 -20   1   -0.60    8.80
  -3  20  -1    8.00    7.80
  -4 -20  -1   -3.60    6.70
   4 -20   1   14.90    8.90
   4 -20   1   -1.00    8.70
  -4  20  -1   -2.20    6.90
  -5 -20  -1   62.79   11.90
   5 -20   1   55.99   14.50
   5 -20   1   43.40   14.00
  -5 -20  -1   39.10   10.00
  -5  20  -1   54.19   13.50
   3 -21  -1   -5.10    7.40
  -3 -21   1    0.00    6.80
   3 -21  -1   -1.70    8.20
  -3  21   1    7.60    7.90
   2 -21  -1    0.90    9.00
  -2 -21   1   18.40    9.10
   2 -21  -1   -5.20    6.90
  -2  21   1   12.80    8.50
   1 -21  -1    4.20    8.10
  -1 -21   1   12.60    9.30
  -1  21   1   27.10   10.30
   0 -21  -1    9.30    8.90
   0 -21   1   -7.90    6.20
   0  21   1    8.80    7.20
   0  21  -1    2.50    6.90
  -1 -21  -1    3.00    8.10
   1 -21   1  -12.30    6.60
  -1  21  -1    5.10    7.50
   1  21   1   11.00    7.10
  -2 -21  -1   17.80    9.50
   2 -21   1    4.40    8.50
  -2  21  -1    9.70    7.90
   3 -21   1   -1.00    7.90
  -3 -21  -1    0.10    7.00
   3 -21   1    1.80    9.30
  -3  21  -1   -0.80    6.60
 -13   0   2   11.50    6.30
 -13   0   2   17.20    6.70
 -12   0   2   15.60    5.90
 -12   0   2   10.20    5.40
 -11   0   2   34.50    7.00
 -11   0   2   30.90    6.80
 -10   0   2   30.20    6.00
 -10   0   2   43.30    7.00
 -10   0   2   28.40    6.30
  -9   0   2    7.50    3.70
  -9   0   2    8.70    3.50
  -9   0   2    2.20    3.60
  -8   0   2   46.80    6.20
  -8   0   2   48.40    6.40
  -8   0   2   53.29    6.30
   8   0  -2   62.49    7.30
  -7   0   2  582.94   22.80
   7   0  -2  565.34   23.30
  -7   0   2  554.34   23.40
  -7   0   2  585.34   23.00
  -6   0   2  820.32   30.20
   6   0  -2  844.52   30.70
  -6   0   2  819.72   30.10
   6   0  -2  807.12   30.70
  -6   0   2  847.72   31.30
  -6   0   2  857.61   31.60
   5   0  -2   29.30    3.90
  -5   0   2   26.30    3.80
  -5   0   2   28.10    3.40
   5   0  -2   23.50    3.60
  -5   0   2   34.60    4.30
  -5   0   2   27.20    3.50
  -4   0   2    4.40    2.10
   4   0  -2    8.70    2.20
  -4   0   2    5.80    1.80
  -4   0   2    5.50    1.20
   4   0  -2    4.90    2.10
  -4   0   2    5.50    2.30
  -4   0   2    5.00    1.70
  -3   0   2  175.38    7.20
  -3   0   2  166.68    7.10
  -3   0   2  179.88    6.70
  -3   0   2  169.88    7.90
   3   0  -2  172.28    7.70
   3   0  -2  174.68    7.90
  -3   0   2  171.78    6.70
   2   0  -2   92.59    4.60
  -2   0   2   87.09    4.80
  -2   0   2   80.99    4.00
  -2   0   2   86.59    4.30
  -2   0   2   84.49    4.00
  -2   0   2   88.19    4.80
   2   0  -2   85.19    4.60
  -2   0   2   85.19    4.10
  -1   0   2  123.29    5.40
   1   0  -2  126.99    5.60
   1   0  -2  128.69    5.70
  -1   0   2  125.49    5.30
  -1   0   2  119.39    5.70
  -1   0   2  121.79    6.00
  -1   0   2  125.89    5.70
  -1   0   2  133.99    5.60
  -1   0   2  132.29    5.40
   0   0  -2  597.64   20.40
   0   0   2  544.15   20.00
   0   0   2  566.34   20.40
   0   0   2  615.74   19.30
   0   0  -2  556.04   19.80
   0   0  -2  607.14   20.20
  -1   0  -2 6458.85  199.18
  -1   0  -2 6336.17  195.58
   1   0   2 6227.78  186.38
   1   0   2 6252.57  196.58
  -1   0  -2 5723.53  192.38
   1   0   2 5877.71  199.08
  -1   0  -2 6130.19  188.08
   2   0   2   65.99    5.00
  -2   0  -2   65.69    4.70
   2   0   2   63.79    5.00
  -2   0  -2   69.79    5.20
   2   0   2   69.49    4.00
  -2   0  -2   61.59    5.00
  -2   0  -2   65.79    5.00
  -2   0  -2   61.49    4.50
  -2   0  -2   60.89    4.70
  -3   0  -2  273.37   12.70
  -3   0  -2  263.87   11.90
  -3   0  -2  287.37   12.00
   3   0   2  288.27   12.40
  -3   0  -2  283.17   12.50
  -3   0  -2  287.17   12.70
   3   0   2  286.27   10.50
   3   0   2  269.87   12.50
  -3   0  -2  266.97   12.50
  -4   0  -2  756.92   28.00
   4   0   2  733.53   24.10
   4   0   2  694.33   27.70
   4   0   2  764.42   27.70
  -4   0  -2  731.03   26.90
  -4   0  -2  743.43   27.10
  -4   0  -2  738.43   28.10
  -4   0  -2  717.03   27.90
   5   0   2 1267.17   39.10
  -5   0  -2 1228.08   43.60
   5   0   2 1251.87   44.50
  -5   0  -2 1203.78   43.00
  -5   0  -2 1197.38   44.90
  -5   0  -2 1215.98   44.60
   5   0   2 1272.17   44.90
  -6   0  -2   17.50    3.90
   6   0   2   10.80    3.80
  -6   0  -2   14.60    4.20
   6   0   2   10.60    3.70
  -6   0  -2    7.90    2.60
  -6   0  -2   14.90    4.70
  -7   0  -2   61.19    8.90
   7   0   2   64.39    7.70
  -7   0  -2   69.89    7.70
   7   0   2   54.59    7.50
  -7   0  -2   55.59    7.50
  -7   0  -2   65.59    6.20
   8   0   2   93.29   10.30
  -8   0  -2   82.29   10.80
  -8   0  -2   79.69    6.20
  -8   0  -2   80.19    9.00
  -8   0  -2   79.29    9.30
   9   0   2   27.90    6.40
  -9   0  -2   28.90    8.40
  -9   0  -2   31.00    6.70
  -9   0  -2   31.60    6.60
 -10   0  -2   98.09   14.00
 -10   0  -2   98.39   11.70
 -10   0  -2  113.19   12.60
 -11   0  -2   66.89   12.10
 -11   0  -2   55.89    9.20
 -11   0  -2   64.19   10.20
 -12   0  -2   44.30    9.60
 -12   0  -2   33.20    7.70
 -13   0  -2    4.60    6.60
 -13   0  -2   -0.70    5.40
 -13  -1   2   -0.30    4.90
 -13  -1   2    4.10    4.40
 -13   1   2    9.90    5.70
 -13   1   2    2.80    6.20
 -12  -1   2    2.10    4.40
 -12  -1   2    9.80    5.10
 -12   1   2    0.50    4.70
 -12   1   2    7.30    5.50
 -11  -1   2    5.40    4.10
 -11  -1   2   10.20    4.30
 -11  -1   2    1.30    4.00
 -11   1   2    2.70    4.30
 -11   1   2   14.00    5.20
 -10  -1   2   38.00    6.70
 -10  -1   2   38.00    6.60
 -10  -1   2   47.30    6.90
 -10   1   2   48.40    7.50
 -10   1   2   27.00    6.60
 -10   1   2   45.00    7.60
   9  -1  -2   70.39    8.90
  -9  -1   2   57.19    7.00
  -9  -1   2   59.89    7.20
  -9  -1   2   61.29    7.20
  -9   1   2   50.59    7.00
  -9   1   2   45.60    7.50
  -9   1   2   40.10    6.50
   8  -1  -2   82.29    9.00
  -8  -1   2   66.49    6.70
  -8  -1   2   75.49    7.50
  -8  -1   2   75.09    7.20
  -8   1   2   59.49    7.00
  -8   1   2   71.09    8.10
  -8   1   2   85.99    8.70
   8   1  -2   72.29    7.60
  -7  -1   2   49.70    5.80
  -7  -1   2   52.09    5.80
  -7  -1   2   64.79    5.90
   7  -1  -2   49.40    6.60
  -7  -1   2   53.19    5.50
  -7   1   2   57.09    6.50
   7   1  -2   53.29    6.00
  -7   1   2   52.59    6.30
  -7   1   2   50.29    5.90
  -7   1   2   51.99    4.00
   6  -1  -2   -3.10    2.40
  -6  -1   2    1.80    2.00
  -6  -1   2    0.60    1.90
   6  -1  -2    0.20    2.30
  -6  -1   2   -0.80    1.60
  -6  -1   2    0.60    1.50
  -6   1   2    1.30    2.20
  -6   1   2   -0.80    1.90
  -6   1   2    1.80    1.70
   6   1  -2    1.30    2.10
  -6   1   2   -1.20    2.20
   6   1  -2   -0.20    1.90
  -5  -1   2  185.68    8.90
   5  -1  -2  183.78    9.80
  -5  -1   2  185.68    8.90
   5  -1  -2  190.48   10.00
  -5  -1   2  188.78    8.00
  -5  -1   2  181.88    7.90
  -5   1   2  183.78    8.40
  -5   1   2  184.78    9.40
  -5   1   2  185.78    9.20
   5   1  -2  182.18    8.40
   5   1  -2  178.18    8.50
  -5   1   2  180.78    9.80
  -4  -1   2   27.80    3.10
   4  -1  -2   21.70    3.60
  -4  -1   2   26.50    2.20
  -4  -1   2   27.90    2.20
  -4  -1   2   31.70    3.30
   4  -1  -2   37.30    4.30
  -4   1   2   25.10    3.30
   4   1  -2   29.90    3.00
   4   1  -2   28.90    2.90
  -4   1   2   27.50    3.20
  -4   1   2   22.80    3.20
  -4   1   2   30.50    4.10
  -4   1   2   28.50    2.40
  -3  -1   2    7.30    1.80
  -3  -1   2    9.70    3.30
   3  -1  -2    6.60    2.30
   3  -1  -2    7.40    2.40
  -3   1   2    3.80    2.30
  -3   1   2    5.20    1.80
  -3   1   2    6.40    1.90
  -3   1   2    7.30    2.00
   3   1  -2    6.30    1.50
   3   1  -2    9.70    1.50
  -3   1   2    9.10    1.80
   2  -1  -2   57.99    4.80
   2  -1  -2   47.90    4.30
  -2  -1   2   52.59    3.20
  -2  -1   2   68.69    5.80
  -2  -1   2   49.70    3.00
   2   1  -2   49.00    2.60
  -2   1   2   56.59    3.90
  -2   1   2   55.59    4.10
  -2   1   2   49.20    3.70
  -2   1   2   55.39    3.80
   2   1  -2   53.59    2.90
   1  -1  -2  607.84   21.10
  -1  -1   2  601.74   20.50
  -1  -1   2  596.24   19.80
  -1  -1   2  601.84   19.70
  -1  -1   2  585.64   21.40
  -1  -1   2  579.94   20.40
  -1  -1   2  608.04   19.90
  -1  -1   2  577.04   19.60
   1  -1  -2  603.34   21.30
  -1   1   2  607.34   21.30
   1   1  -2  611.14   20.40
  -1   1   2  598.24   20.80
   1   1  -2  607.94   20.10
  -1   1   2  600.34   20.80
   0  -1   2   92.19    4.70
   0  -1  -2   90.09    5.00
   0  -1  -2   91.49    5.00
   0  -1   2   90.29    4.80
   0  -1   2   91.69    4.50
   0  -1   2   94.89    4.70
   0   1  -2   92.59    5.00
   0   1   2   86.49    4.70
   0   1  -2   93.99    4.70
   0   1   2   84.29    4.90
  -1  -1  -2 1218.38   40.60
   1  -1   2 1297.47   42.00
  -1  -1  -2 1202.28   39.60
  -1  -1  -2 1176.28   41.50
   1  -1   2 1244.78   41.40
  -1  -1  -2 1204.08   39.80
   1  -1   2 1240.68   38.90
  -1   1  -2 1232.08   39.00
   1   1   2 1285.07   41.70
  -1   1  -2 1247.18   40.60
   1   1   2 1193.78   40.90
  -1   1  -2 1186.38   41.80
  -1   1  -2 1205.58   41.20
   2  -1   2   43.10    4.60
  -2  -1  -2   42.30    4.20
   2  -1   2   28.60    3.70
  -2  -1  -2   45.10    4.70
  -2  -1  -2   38.80    4.20
  -2  -1  -2   43.80    4.10
  -2  -1  -2   23.30    2.80
   2  -1   2   41.80    3.60
  -2  -1  -2   37.30    3.50
   2   1   2   45.40    3.60
  -2   1  -2   38.30    4.30
  -2   1  -2   29.80    3.80
   2   1   2   36.00    3.80
   2   1   2   39.40    4.10
  -2   1  -2   43.80    4.30
  -2   1  -2   41.70    3.90
  -2   1  -2   42.80    4.70
  -3  -1  -2  111.79    7.50
  -3  -1  -2  113.99    7.10
  -3  -1  -2  129.59    6.70
  -3  -1  -2  117.19    7.60
  -3  -1  -2  117.59    7.00
  -3  -1  -2  118.69    6.50
  -3  -1  -2  120.49    6.60
   3  -1   2  121.59    7.70
   3  -1   2  120.99    7.60
  -3   1  -2  109.59    7.20
  -3   1  -2  120.19    7.10
  -3   1  -2  130.49    7.40
  -3   1  -2  140.79    8.20
   3   1   2  124.69    5.80
   3   1   2  120.49    6.90
   3   1   2  105.59    6.90
  -3   1  -2  115.69    7.30
  -3   1  -2  125.29    7.70
  -4  -1  -2   44.40    6.00
  -4  -1  -2   42.50    5.70
  -4  -1  -2   43.30    5.10
   4  -1   2   42.50    5.40
   4  -1   2   48.80    5.70
  -4  -1  -2   54.49    6.10
  -4  -1  -2   42.00    4.40
  -4  -1  -2   44.30    4.50
  -4   1  -2   61.09    6.90
  -4   1  -2   46.70    5.70
  -4   1  -2   59.99    5.80
  -4   1  -2   38.10    4.50
  -4   1  -2   35.70    4.40
   4   1   2   34.40    4.80
   4   1   2   41.60    4.90
   4   1   2   42.90    3.60
  -4   1  -2   48.50    6.10
  -5  -1  -2    1.70    3.00
   5  -1   2    9.40    3.40
  -5  -1  -2    2.00    2.00
  -5  -1  -2    2.60    2.00
   5  -1   2    6.80    3.30
  -5  -1  -2    6.70    2.90
  -5   1  -2    2.90    3.60
  -5   1  -2    1.10    2.20
   5   1   2    3.90    2.50
   5   1   2    1.90    2.60
  -5   1  -2    5.20    3.00
  -5   1  -2    4.00    2.60
  -5   1  -2    5.40    2.60
   5   1   2    7.80    1.90
   6  -1   2  234.88   13.10
  -6  -1  -2  213.68   12.30
  -6  -1  -2  233.88   12.00
  -6  -1  -2  223.58   13.90
   6  -1   2  206.48   13.00
  -6  -1  -2  228.08   10.50
   6   1   2  233.18   12.30
  -6   1  -2  219.58   12.30
  -6   1  -2  246.08   12.00
  -6   1  -2  223.28   12.20
  -6   1  -2  242.78   14.30
   6   1   2  241.58    8.90
  -6   1  -2  230.18   13.20
   6   1   2  221.68   12.40
  -7  -1  -2   -1.90    3.20
   7  -1   2   -6.30    2.20
   7  -1   2    1.90    3.30
  -7  -1  -2    2.50    2.50
  -7  -1  -2    0.90    2.80
  -7  -1  -2    2.40    1.70
  -7   1  -2   -3.80    1.90
  -7   1  -2    5.90    3.60
   7   1   2    4.70    3.30
  -7   1  -2   -0.50    2.60
  -7   1  -2    0.50    2.20
  -7   1  -2   -5.50    2.80
  -8  -1  -2   12.10    4.50
  -8  -1  -2   17.10    6.30
   8  -1   2   18.70    5.50
  -8  -1  -2    6.30    3.30
  -8   1  -2   12.00    4.70
  -8   1  -2   -1.50    3.10
  -8   1  -2    9.30    3.00
   8   1   2   16.90    5.30
  -8   1  -2   10.30    5.60
  -9  -1  -2   64.39   10.70
  -9  -1  -2   83.09    9.90
   9  -1   2   92.79   11.50
  -9  -1  -2   81.79    9.60
  -9   1  -2   73.69    9.80
  -9   1  -2   80.79   12.30
  -9   1  -2   75.69    9.30
   9   1   2   72.19    9.80
  10  -1   2   78.29   10.90
 -10  -1  -2  108.69   14.80
 -10  -1  -2   87.79   10.60
 -10  -1  -2   83.69   10.30
 -10   1  -2   92.29   11.70
 -10   1  -2   88.99   11.60
 -10   1  -2   88.19   13.30
 -11  -1  -2    3.20    5.00
 -11  -1  -2    4.60    6.90
 -11  -1  -2   -3.70    4.10
 -11   1  -2    9.40    6.10
 -11   1  -2    0.60    4.40
 -11   1  -2   -4.60    5.30
 -12  -1  -2    3.70    5.40
 -12  -1  -2   13.30    6.70
 -12   1  -2   10.00    6.30
 -12   1  -2    5.00    6.90
 -12   1  -2   22.10    9.10
 -13  -1  -2   26.20    8.10
 -13  -1  -2   28.70    8.60
 -13   1  -2   21.60    8.80
 -13  -2   2    5.80    4.90
 -13   2   2    2.80    5.60
 -13   2   2   -0.40    5.90
 -12  -2   2   15.20    5.60
 -12  -2   2   13.40    5.50
 -12  -2   2    4.50    3.60
 -12   2   2    1.90    6.30
 -12   2   2   15.70    6.40
 -11  -2   2   -1.20    3.20
 -11  -2   2    4.00    3.80
 -11  -2   2    4.90    3.50
 -11   2   2    1.10    4.50
 -11   2   2    3.70    4.50
 -10  -2   2   33.60    5.80
 -10  -2   2   26.20    5.50
 -10  -2   2   26.50    5.50
 -10   2   2   31.40    7.10
 -10   2   2   47.20    8.20
  -9  -2   2   22.20    4.50
  -9  -2   2   11.70    3.60
  -9  -2   2   23.40    4.30
   9  -2  -2   18.50    6.20
  -9   2   2   22.40    6.00
  -9   2   2   20.00    5.00
  -9   2   2   14.90    5.00
  -8  -2   2   62.29    6.20
   8  -2  -2   66.79    8.70
  -8  -2   2   76.59    6.90
  -8  -2   2   67.59    6.50
  -8   2   2   76.09    6.40
  -8   2   2   55.29    7.70
  -8   2   2   57.09    7.30
  -8   2   2   73.99    8.50
   7  -2  -2  206.18   12.20
  -7  -2   2  191.48    9.40
  -7  -2   2  188.28    9.30
  -7  -2   2  203.98   10.10
  -7  -2   2  215.28   10.20
   7  -2  -2  194.58   11.80
  -7   2   2  194.58   10.00
  -7   2   2  198.28   12.20
   7   2  -2  195.48   10.00
  -7   2   2  186.78   11.50
  -7   2   2  176.78   11.20
  -6  -2   2  182.58    8.20
   6  -2  -2  194.38   11.00
  -6  -2   2  196.18    9.30
  -6  -2   2  189.88    8.30
   6  -2  -2  185.88   11.10
  -6  -2   2  187.68    9.20
  -6   2   2  196.38   11.30
  -6   2   2  187.58   10.60
  -6   2   2  218.88   11.20
   6   2  -2  176.38    8.80
  -6   2   2  201.58    9.80
  -5  -2   2   24.60    3.00
  -5  -2   2   23.00    2.90
   5  -2  -2   27.60    4.70
  -5  -2   2   26.20    1.90
  -5  -2   2   26.10    1.90
   5  -2  -2   25.20    4.40
  -5   2   2   28.80    2.60
  -5   2   2   22.90    3.70
  -5   2   2   35.10    5.10
  -5   2   2   27.10    4.10
  -5   2   2   20.50    3.60
   5   2  -2   29.80    3.00
  -4  -2   2  102.79    7.70
   4  -2  -2   96.59    6.90
   4  -2  -2  102.09    7.00
  -4  -2   2  100.89    4.80
  -4  -2   2   93.79    4.70
  -4   2   2   85.59    6.00
  -4   2   2   90.09    6.10
  -4   2   2   95.69    7.00
  -4   2   2   99.79    6.50
  -3  -2   2    3.20    1.10
   3  -2  -2    1.70    2.30
   3  -2  -2   -0.40    2.30
  -3  -2   2    0.60    2.50
  -3   2   2    0.60    1.80
  -3   2   2   -0.60    2.00
  -3   2   2   -0.40    1.60
  -3   2   2    0.00    1.70
   2  -2  -2   22.60    3.60
  -2  -2   2   27.20    3.80
  -2  -2   2   27.60    2.00
   2  -2  -2   22.30    3.50
  -2  -2   2   26.30    2.00
  -2   2   2   26.40    3.30
  -2   2   2   37.10    4.00
  -2   2   2   31.60    3.80
  -2   2   2   29.70    3.90
  -1  -2   2  339.87   12.30
   1  -2  -2  327.37   13.50
  -1  -2   2  326.07   11.50
  -1  -2   2  321.77   12.20
  -1  -2   2  335.57   11.50
   1  -2  -2  354.36   13.60
  -1  -2   2  335.47   11.50
   1   2  -2  362.36   13.30
   1   2  -2  333.67   12.10
   1   2  -2  365.16   12.00
  -1   2   2  346.57   13.30
  -1   2   2  338.17   13.60
  -1   2   2  327.47   13.20
   0  -2  -2  602.64   21.00
   0  -2   2  545.55   20.00
   0  -2   2  578.54   20.40
   0  -2   2  559.74   20.10
   0  -2   2  551.94   20.70
   0  -2  -2  573.74   21.10
   0   2   2  583.84   21.10
   0   2  -2  594.84   20.70
   0   2  -2  604.34   20.60
   0   2   2  591.34   20.80
  -1  -2  -2  114.49    6.60
  -1  -2  -2  133.29    6.70
  -1  -2  -2  137.39    6.60
  -1  -2  -2  126.49    6.20
  -1  -2  -2  130.09    6.30
   1  -2   2  124.59    6.90
   1  -2   2  125.59    7.00
   1   2   2  131.19    6.60
  -1   2  -2  138.49    7.10
  -1   2  -2  128.39    5.60
  -1   2  -2  121.59    6.70
   1   2   2  122.69    6.40
  -1   2  -2  134.89    7.10
  -2  -2  -2   81.49    5.30
  -2  -2  -2   71.79    4.60
  -2  -2  -2   65.39    5.10
  -2  -2  -2   72.89    4.80
  -2  -2  -2   80.79    6.50
  -2  -2  -2   78.19    4.70
   2  -2   2   80.39    6.10
   2  -2   2   85.39    6.30
  -2  -2  -2   81.99    4.70
  -2   2  -2   70.69    6.20
   2   2   2   77.79    5.30
  -2   2  -2   77.19    5.10
  -2   2  -2   79.59    5.70
   2   2   2   74.69    5.10
  -2   2  -2   77.19    5.60
  -2   2  -2   84.49    5.80
  -3  -2  -2   31.40    3.40
  -3  -2  -2   37.50    3.70
  -3  -2  -2   30.10    4.70
  -3  -2  -2   42.90    4.50
  -3  -2  -2   30.30    3.90
   3  -2   2   30.90    4.80
   3  -2   2   38.20    5.20
  -3  -2  -2   29.50    4.40
  -3  -2  -2   39.50    3.80
  -3   2  -2   37.60    5.00
  -3   2  -2   26.40    3.80
   3   2   2   36.90    4.20
   3   2   2   38.30    4.30
  -3   2  -2   42.30    5.50
  -3   2  -2   28.70    4.50
  -4  -2  -2  149.59    7.40
   4  -2   2  167.18    9.90
  -4  -2  -2  155.98    9.50
  -4  -2  -2  138.09    7.60
   4  -2   2  134.69    9.50
  -4  -2  -2  146.39    8.50
  -4  -2  -2  155.18    8.00
  -4  -2  -2  135.69    9.10
  -4   2  -2  147.69    9.70
   4   2   2  158.38    8.40
  -4   2  -2  165.18    9.40
  -4   2  -2  175.48   10.10
   4   2   2  159.18    7.20
  -4   2  -2  145.89    9.00
   4   2   2  157.98    8.60
  -4   2  -2  154.18    9.00
  -4   2  -2  164.28    9.80
   5  -2   2  122.49    9.00
  -5  -2  -2  122.79    8.20
   5  -2   2  121.09    9.10
  -5  -2  -2  124.69    7.40
  -5  -2  -2  108.09   10.10
  -5  -2  -2  124.99    6.40
   5   2   2  116.89    6.00
  -5   2  -2  121.39    9.10
  -5   2  -2  128.49    8.40
  -5   2  -2  119.19    8.30
   5   2   2  121.59    7.80
  -5   2  -2  116.49   10.60
  -5   2  -2  120.49    9.20
   5   2   2  117.89    7.70
  -5   2  -2  125.99    8.60
  -6  -2  -2    3.10    1.70
  -6  -2  -2    4.60    3.00
   6  -2   2    2.60    3.10
  -6  -2  -2    3.60    3.30
  -6  -2  -2    4.20    2.40
   6  -2   2    7.00    3.60
  -6   2  -2    1.50    2.50
   6   2   2    3.40    3.00
   6   2   2    4.00    1.80
   6   2   2    4.20    2.60
  -6   2  -2    4.70    2.60
  -6   2  -2    6.30    3.60
  -6   2  -2   10.40    4.30
  -6   2  -2    3.30    2.70
   7  -2   2   45.80    7.20
  -7  -2  -2   37.90    7.90
  -7  -2  -2   49.80    5.90
  -7  -2  -2   46.20    3.80
  -7  -2  -2   48.50    6.50
   7  -2   2   41.80    7.40
   7   2   2   46.50    6.40
  -7   2  -2   46.50    6.60
  -7   2  -2   47.20    6.80
  -7   2  -2   51.79    6.70
  -7   2  -2   49.00    8.10
  -7   2  -2   45.30    7.40
  -8  -2  -2   22.10    4.80
  -8  -2  -2   15.30    4.70
  -8  -2  -2   20.50    6.90
   8  -2   2   21.90    6.50
  -8   2  -2   21.70    5.80
  -8   2  -2   12.50    4.10
  -8   2  -2   16.20    4.10
  -8   2  -2   17.10    5.20
   8   2   2   22.90    5.50
  -8   2  -2   14.60    5.90
  -9  -2  -2    0.40    3.60
  -9  -2  -2    5.40    3.50
   9  -2   2    4.40    5.10
  -9  -2  -2    4.20    5.40
  -9   2  -2   -3.20    2.40
  -9   2  -2   -1.10    4.30
  -9   2  -2   -0.60    3.60
  -9   2  -2    4.20    3.80
 -10  -2  -2   12.80    6.90
  10  -2   2   25.60    7.30
 -10  -2  -2   18.30    5.90
 -10  -2  -2   10.20    5.20
 -10   2  -2   18.90    7.30
 -10   2  -2   14.10    5.30
 -10   2  -2    8.30    5.80
 -11  -2  -2   59.09    9.30
 -11  -2  -2   70.09    9.90
 -11   2  -2   67.29   12.60
 -11   2  -2   78.19   11.30
 -11   2  -2   62.09   10.80
 -12  -2  -2   34.40    7.90
 -12  -2  -2   31.50    8.00
 -12   2  -2   31.20    9.30
 -12   2  -2   20.10    9.20
 -13  -2  -2    5.00    6.30
 -13  -2  -2   -7.20    4.00
 -13   2  -2    4.70    7.10
 -13  -3   2    1.90    3.90
 -13   3   2   13.10    7.70
 -12  -3   2  174.68   12.80
 -12  -3   2  155.08   12.30
 -12   3   2  166.58   17.00
 -12   3   2  133.69   15.70
 -11  -3   2   50.69    7.10
 -11  -3   2   54.49    7.00
 -11  -3   2   49.50    7.40
 -11   3   2   62.39   10.30
 -11   3   2   56.99    9.70
 -10  -3   2    0.30    3.10
  10  -3  -2    5.30    5.00
 -10  -3   2    9.60    3.50
 -10  -3   2    9.50    3.40
 -10   3   2   14.40    5.40
 -10   3   2    7.20    5.00
  -9  -3   2   74.89    7.20
  -9  -3   2   72.69    7.20
   9  -3  -2   82.59   10.50
  -9  -3   2   79.19    7.20
  -9   3   2   69.39    9.90
  -9   3   2   43.30    7.60
   8  -3  -2  246.58   15.30
  -8  -3   2  252.47   11.60
  -8  -3   2  260.37   11.80
  -8  -3   2  234.68   11.30
  -8   3   2  221.28   14.80
  -8   3   2  246.38   12.70
  -8   3   2  242.18   14.50
  -8   3   2  280.67   15.30
  -7  -3   2   40.90    3.90
   7  -3  -2   43.80    6.40
   7  -3  -2   34.60    6.20
  -7  -3   2   45.00    4.40
  -7  -3   2   48.40    4.70
  -7  -3   2   47.10    4.10
  -7   3   2   38.90    5.50
  -7   3   2   31.70    6.00
  -7   3   2   58.19    7.30
  -7   3   2   31.30    5.40
   6  -3  -2   30.70    5.70
  -6  -3   2   30.00    3.30
  -6  -3   2   29.70    3.30
  -6  -3   2   29.00    2.10
  -6  -3   2   26.00    2.10
  -6   3   2   24.40    4.20
  -6   3   2   30.30    4.80
   6   3  -2   36.80    3.50
  -6   3   2   28.10    4.80
  -6   3   2   30.80    5.50
   5  -3  -2  302.37   14.70
  -5  -3   2  289.77   11.00
  -5  -3   2  303.07   11.10
  -5  -3   2  279.37   15.60
  -5   3   2  283.47   14.10
  -5   3   2  317.77   13.90
  -5   3   2  288.27   14.80
  -5   3   2  276.57   13.80
  -5   3   2  274.77   14.10
   4  -3  -2  152.18    9.50
   4  -3  -2  167.08    9.70
  -4  -3   2  165.18   10.40
  -4   3   2  166.58    9.80
  -4   3   2  157.08    9.00
  -4   3   2  163.38    9.00
  -4   3   2  159.48    9.10
  -4   3   2  151.78    9.00
   3  -3  -2   72.69    6.50
   3  -3  -2   68.49    6.60
  -3  -3   2   61.39    6.60
  -3   3   2   68.79    5.40
  -3   3   2   74.99    5.70
  -3   3   2   75.99    5.80
  -3   3   2   74.19    6.90
   2  -3  -2  697.63   27.00
   2  -3  -2  738.23   27.00
  -2  -3   2  733.43   24.30
  -2  -3   2  740.63   24.30
  -2   3   2  746.33   26.50
  -2   3   2  690.23   26.80
  -2   3   2  725.93   26.40
  -1  -3   2 9959.20  308.57
   1  -3  -2 9742.73  314.87
   1  -3  -2 9999.00  311.07
  -1  -3   2 9768.32  308.17
  -1  -3   2 9705.73  313.17
  -1  -3   2 9555.64  313.07
  -1  -3   2 9535.25  307.27
   1   3  -2 9771.62  312.87
   1   3  -2 9967.80  303.97
  -1   3   2 9573.84  310.57
  -1   3   2 9318.27  314.57
   0  -3   2  323.57   12.30
   0  -3   2  327.57   12.90
   0  -3   2  328.37   12.60
   0  -3  -2  294.57   12.90
   0  -3   2  306.57   12.10
   0  -3  -2  316.47   13.20
   0  -3  -2  306.97   12.50
   0   3  -2  329.57   12.70
   0   3  -2  307.87   12.40
   0   3  -2  319.77   12.70
   0   3   2  297.57   12.90
  -1  -3  -2    1.00    1.60
   1  -3   2   -2.00    1.90
  -1  -3  -2    2.30    1.60
   1  -3   2    2.50    2.30
  -1  -3  -2    3.20    1.90
  -1  -3  -2    4.70    2.30
  -1  -3  -2    4.50    2.40
   1  -3   2    2.90    1.80
  -1  -3  -2    3.80    2.10
  -1   3  -2    7.00    2.60
  -1   3  -2    5.50    2.50
   1   3   2    1.70    1.90
  -1   3  -2    4.70    2.60
   1   3   2    2.70    1.90
  -1   3  -2    4.30    1.50
   2  -3   2  138.79    8.50
  -2  -3  -2  136.79    7.40
  -2  -3  -2  134.19    6.80
  -2  -3  -2  135.79    6.90
  -2  -3  -2  145.89    6.20
  -2  -3  -2  142.49    7.40
   2  -3   2  140.19    8.60
  -2  -3  -2  143.09    8.00
  -2  -3  -2  141.49    7.00
   2   3   2  134.39    7.40
  -2   3  -2  140.89    8.10
  -2   3  -2  139.09    8.10
   2   3   2  138.59    7.10
  -2   3  -2  150.08    8.60
   3  -3   2  285.97   13.70
   3  -3   2  275.97   13.60
  -3  -3  -2  258.37   12.30
  -3  -3  -2  272.87   12.10
  -3  -3  -2  265.27   12.70
  -3  -3  -2  286.17   11.40
  -3  -3  -2  261.07   10.90
  -3  -3  -2  267.17   11.20
  -3  -3  -2  261.87   12.00
  -3   3  -2  253.67   12.60
  -3   3  -2  270.37   13.00
  -3   3  -2  276.47   13.50
   3   3   2  275.77   11.90
  -3   3  -2  278.87   13.30
   3   3   2  275.27   11.70
  -4  -3  -2   55.39    3.90
  -4  -3  -2   64.09    7.20
   4  -3   2   74.49    8.00
  -4  -3  -2   58.39    4.50
   4  -3   2   55.59    6.60
  -4  -3  -2   66.69    6.80
  -4  -3  -2   49.90    5.30
  -4  -3  -2   53.59    5.00
  -4  -3  -2   53.59    6.70
  -4   3  -2   56.09    6.50
   4   3   2   62.69    5.60
  -4   3  -2   52.39    6.10
  -4   3  -2   51.89    5.70
  -4   3  -2   43.20    5.80
  -4   3  -2   58.49    7.20
  -4   3  -2   63.69    6.50
   4   3   2   57.49    5.30
  -5  -3  -2  624.84   24.80
  -5  -3  -2  612.44   25.70
   5  -3   2  654.43   27.00
   5  -3   2  625.54   26.80
  -5  -3  -2  598.54   25.80
  -5  -3  -2  620.04   23.70
  -5  -3  -2  617.64   23.90
  -5  -3  -2  632.94   22.10
   5   3   2  643.34   24.40
   5   3   2  673.93   24.70
  -5   3  -2  643.34   25.80
  -5   3  -2  660.93   26.30
  -5   3  -2  620.34   26.90
  -5   3  -2  662.73   26.40
  -5   3  -2  642.54   26.90
  -5   3  -2  645.14   26.00
   6  -3   2  639.14   27.60
   6  -3   2  671.03   27.90
  -6  -3  -2  621.44   25.40
  -6  -3  -2  622.54   24.50
  -6  -3  -2  684.03   24.80
  -6  -3  -2  608.14   27.10
   6   3   2  587.54   24.60
  -6   3  -2  620.64   26.50
  -6   3  -2  617.14   27.60
  -6   3  -2  602.44   25.90
   6   3   2  646.64   22.10
  -6   3  -2  616.44   27.10
   6   3   2  662.53   25.20
  -6   3  -2  659.23   27.10
   7  -3   2  186.58   12.70
  -7  -3  -2  166.38   10.80
   7  -3   2  190.08   13.20
  -7  -3  -2  168.48   10.30
  -7  -3  -2  194.78   16.50
  -7   3  -2  186.08   13.40
  -7   3  -2  171.28   12.30
   7   3   2  185.88   11.10
  -7   3  -2  177.18   12.00
  -7   3  -2  172.28   11.30
  -7   3  -2  198.08   12.70
  -8  -3  -2   -1.50    2.50
  -8  -3  -2   -1.30    4.00
  -8  -3  -2   -3.80    2.00
   8  -3   2    8.20    4.80
  -8  -3  -2   -5.40    2.30
  -8   3  -2    2.60    4.90
  -8   3  -2   -2.60    2.80
  -8   3  -2    2.80    3.80
   8   3   2    2.20    3.50
  -8   3  -2    0.70    2.40
   9  -3   2   14.10    5.90
  -9  -3  -2   20.60    5.00
  -9  -3  -2   34.60    6.30
  -9  -3  -2   14.80    4.50
  -9  -3  -2   19.90    7.00
  -9   3  -2   26.20    7.90
  -9   3  -2   38.30    7.90
  -9   3  -2   24.80    5.50
  -9   3  -2   29.10    6.80
  10  -3   2  101.19   13.00
 -10  -3  -2  114.49   11.50
 -10  -3  -2  114.69   11.40
 -10  -3  -2   95.09   10.70
 -10   3  -2  102.09   12.90
 -10   3  -2  102.79   13.80
 -10   3  -2   83.39   11.70
 -11  -3  -2   14.80    5.20
 -11  -3  -2    8.10    4.70
  11  -3   2   15.40    7.20
 -11   3  -2   24.60    9.10
 -11   3  -2   30.20    8.80
 -12  -3  -2   24.10    7.10
 -12  -3  -2   31.00    7.30
 -12   3  -2   28.70    9.10
 -12   3  -2   13.60    8.60
 -13  -3  -2   53.29   10.00
 -13  -3  -2   50.19    9.60
 -13   3  -2   78.69   13.20
 -13  -4   2   16.50    5.80
 -13   4   2   13.20    8.10
 -12  -4   2    4.00    3.60
 -12  -4   2    4.60    3.90
 -12   4   2    1.80    6.20
 -11  -4   2   15.30    4.80
 -11  -4   2   23.20    5.10
 -11   4   2   10.70    6.20
 -11   4   2    8.90    5.70
 -10  -4   2   47.30    6.10
  10  -4  -2   32.80    8.40
 -10  -4   2   49.70    5.70
 -10  -4   2   48.10    6.00
 -10   4   2   47.00    8.90
 -10   4   2   45.50    9.10
   9  -4  -2   88.09   11.30
  -9  -4   2  109.89    7.30
  -9  -4   2  114.89    7.40
  -9  -4   2  104.39    7.00
  -9   4   2  127.79   13.60
  -9   4   2  135.89   13.70
  -9   4   2   96.59    9.40
  -8  -4   2    3.50    1.90
  -8  -4   2    0.20    1.80
   8  -4  -2    2.70    4.20
  -8  -4   2    1.80    1.70
  -8   4   2    4.60    3.30
  -8   4   2   -1.10    3.30
  -8   4   2   -1.30    2.70
  -8   4   2    2.90    3.60
   7  -4  -2  149.09   11.50
  -7  -4   2  149.88    6.40
  -7  -4   2  143.59    7.00
  -7  -4   2  142.69    7.00
  -7  -4   2  133.79    6.20
  -7   4   2  169.38   11.40
  -7   4   2  146.49   11.40
  -7   4   2  145.09    9.70
  -7   4   2  152.78   10.40
  -6  -4   2  111.39   11.90
  -6  -4   2   96.19    4.80
  -6  -4   2   94.79    4.70
   6  -4  -2  108.49   10.70
  -6   4   2   86.99    8.80
  -6   4   2  101.99    7.80
   6   4  -2   94.09    4.60
  -6   4   2  104.49    9.90
  -6   4   2   99.49    9.80
  -6   4   2   97.09    9.50
  -5  -4   2   -1.00    2.80
   5  -4  -2    5.20    3.40
  -5   4   2   -0.10    2.10
  -5   4   2    3.20    2.10
  -5   4   2    3.30    2.70
  -5   4   2    4.70    3.40
  -5   4   2    5.00    3.00
   4  -4  -2   71.69    7.70
  -4  -4   2   77.49    8.50
   4  -4  -2   90.69    8.80
  -4   4   2   55.99    6.90
  -4   4   2   73.59    6.80
  -4   4   2   81.39    7.60
  -4   4   2   63.69    6.30
  -4   4   2   67.29    6.90
   3  -4  -2    2.30    2.60
   3  -4  -2    2.60    2.80
  -3  -4   2    4.30    3.20
  -3   4   2    6.60    3.00
  -3   4   2    5.00    2.30
  -3   4   2    7.10    2.80
  -3   4   2    1.40    2.60
  -2  -4   2   52.79    3.40
   2  -4  -2   58.99    6.30
   2  -4  -2   60.79    6.30
  -2  -4   2   51.29    3.50
   2   4  -2   45.80    4.60
  -2   4   2   52.69    5.60
   2   4  -2   47.80    2.90
  -2   4   2   67.59    6.50
  -2   4   2   61.19    6.20
  -1  -4   2 1747.93   56.19
  -1  -4   2 1690.73   56.09
  -1  -4   2 1690.03   56.09
   1  -4  -2 1775.32   58.79
   1  -4  -2 1717.93   59.49
  -1  -4   2 1725.43   57.59
  -1  -4   2 1704.93   57.69
   1   4  -2 1698.23   56.39
  -1   4   2 1677.43   58.19
  -1   4   2 1764.82   59.29
   1   4  -2 1766.12   57.39
   1   4  -2 1711.93   56.59
   0  -4   2   22.20    3.40
   0  -4   2   24.90    3.80
   0  -4   2   24.60    3.20
   0  -4  -2   21.30    3.60
   0  -4  -2   32.60    4.40
   0  -4  -2   25.40    3.60
   0   4  -2   25.30    3.40
   0   4  -2   26.50    3.60
   0   4   2   18.80    3.40
   0   4   2   24.60    3.80
   0   4  -2   23.80    3.50
  -1  -4  -2   14.40    2.30
   1  -4   2   18.30    3.80
  -1  -4  -2   16.50    2.80
  -1  -4  -2   16.60    3.10
  -1  -4  -2   12.90    2.50
   1  -4   2   14.30    2.90
   1  -4   2   14.90    3.60
  -1  -4  -2   13.10    3.10
  -1  -4  -2   17.70    3.30
   1   4   2   14.30    3.00
  -1   4  -2   15.50    3.20
  -1   4  -2   15.80    3.30
  -1   4  -2   13.30    3.10
   1   4   2   12.90    3.00
   2  -4   2    5.60    3.30
  -2  -4  -2   11.10    2.80
  -2  -4  -2   16.00    3.00
  -2  -4  -2   11.50    3.40
   2  -4   2   10.30    3.70
  -2  -4  -2   13.50    2.50
  -2  -4  -2   14.50    2.60
   2   4   2   12.60    2.70
  -2   4  -2   14.40    3.50
   2   4   2    9.10    2.60
  -2   4  -2   11.00    3.40
  -2   4  -2   19.10    3.80
  -3  -4  -2  137.89    8.00
  -3  -4  -2  122.39    7.50
   3  -4   2  136.39    9.30
  -3  -4  -2  136.99    7.00
  -3  -4  -2  145.79    8.00
  -3  -4  -2  132.39    6.80
  -3  -4  -2  116.39    8.10
   3  -4   2  120.49    8.90
  -3   4  -2  120.89    8.40
  -3   4  -2  126.89    8.50
  -3   4  -2  123.99    8.80
   3   4   2  126.29    7.10
   3   4   2  119.29    7.10
  -3   4  -2  116.19    8.10
  -4  -4  -2  136.29    9.10
   4  -4   2  116.89    9.20
  -4  -4  -2  135.49    5.90
  -4  -4  -2  137.59    7.80
  -4  -4  -2  131.49    8.30
  -4  -4  -2  114.69    8.40
   4  -4   2  143.99   10.00
  -4  -4  -2  108.79    7.30
  -4  -4  -2  126.59    7.00
  -4  -4  -2  129.79    7.10
  -4   4  -2  122.49    8.60
   4   4   2  129.19    7.40
  -4   4  -2  132.79    9.50
  -4   4  -2  138.99    9.10
   4   4   2  118.09    7.30
  -4   4  -2  123.89    8.80
  -4   4  -2  116.29    8.80
   5  -4   2  299.37   15.30
  -5  -4  -2  248.98   13.80
  -5  -4  -2  262.87   12.50
  -5  -4  -2  254.77   14.10
  -5  -4  -2  252.47   11.70
  -5  -4  -2  252.87   12.40
  -5  -4  -2  272.87   13.90
   5  -4   2  242.88   14.20
  -5  -4  -2  257.97   11.60
  -5   4  -2  255.97   13.80
  -5   4  -2  247.38   13.80
  -5   4  -2  263.97   14.20
  -5   4  -2  249.48   13.70
  -5   4  -2  266.67   14.70
  -5   4  -2  249.97   14.30
   5   4   2  238.18   11.90
   5   4   2  256.27   12.00
  -6  -4  -2   -0.70    1.90
  -6  -4  -2   -1.80    2.20
   6  -4   2   -2.60    2.90
  -6  -4  -2    3.40    3.40
   6  -4   2    1.10    3.50
  -6  -4  -2   -0.70    2.10
  -6  -4  -2    0.30    1.90
  -6   4  -2   -1.00    3.20
  -6   4  -2    1.30    3.20
  -6   4  -2   -0.30    2.50
   6   4   2    4.30    2.60
  -6   4  -2   -0.90    2.90
   6   4   2    3.80    2.80
  -6   4  -2   -1.90    2.20
  -7  -4  -2   70.99    7.00
  -7  -4  -2   69.59    7.30
   7  -4   2   50.39    8.70
   7  -4   2   82.39   10.30
  -7  -4  -2   59.09    8.70
  -7  -4  -2   67.19    6.90
  -7   4  -2   72.69    8.90
   7   4   2   69.89    7.40
  -7   4  -2   62.29    8.00
  -7   4  -2   67.29    9.30
  -7   4  -2   83.79   10.10
   7   4   2   72.89    6.20
  -8  -4  -2   25.70    5.00
  -8  -4  -2   30.00    5.40
  -8  -4  -2   19.20    4.60
   8  -4   2    5.80    5.10
  -8  -4  -2   22.40    6.30
  -8   4  -2   26.80    6.80
  -8   4  -2   31.40    7.50
  -8   4  -2   25.20    5.70
  -8   4  -2   21.90    6.40
   9  -4   2   10.20    5.70
  -9  -4  -2   10.00    4.00
  -9  -4  -2    3.70    3.30
  -9  -4  -2    5.10    3.70
  -9  -4  -2    6.60    5.30
  -9   4  -2    9.50    5.50
  -9   4  -2   13.40    6.60
  -9   4  -2   18.20    6.50
  -9   4  -2    6.30    4.20
 -10  -4  -2    4.90    3.90
 -10  -4  -2   -1.20    3.30
  10  -4   2   -5.90    4.10
 -10  -4  -2    2.50    3.60
 -10   4  -2    4.10    5.00
 -10   4  -2   -0.80    5.40
 -11  -4  -2   13.60    5.50
 -11  -4  -2   13.00    5.50
  11  -4   2    1.70    5.70
 -11   4  -2    3.40    7.30
 -11   4  -2   21.30    7.70
 -12  -4  -2   30.10    7.50
 -12  -4  -2   27.10    7.10
 -12   4  -2   43.20   10.30
 -12   4  -2   22.10    9.90
 -13  -4  -2    4.00    5.30
 -13   4  -2    5.40    7.40
 -13  -5   2   47.60    7.90
 -13   5   2   56.09   11.80
 -12  -5   2   20.80    5.60
 -12   5   2   21.60    8.60
  11  -5  -2    6.60    6.20
 -11  -5   2    7.50    3.80
 -11  -5   2   -2.40    3.00
 -11   5   2   -0.70    5.10
 -10  -5   2    7.80    3.20
  10  -5  -2   13.00    6.00
 -10  -5   2    2.40    2.70
 -10   5   2    6.30    4.90
 -10   5   2    3.70    5.20
  -9  -5   2   23.20    3.60
   9  -5  -2   16.00    6.40
  -9  -5   2   22.00    3.10
  -9  -5   2   18.30    3.40
  -9   5   2   23.30    6.70
  -9   5   2   22.10    5.40
  -9   5   2   24.80    6.90
  -8  -5   2   70.79    4.50
  -8  -5   2   58.29    4.40
  -8  -5   2   67.59    4.50
   8  -5  -2   73.59   10.50
  -8   5   2   79.39    8.50
  -8   5   2   60.69    9.10
  -8   5   2   80.79   10.30
   7  -5  -2   69.69    8.80
   7  -5  -2   66.39    9.40
  -7  -5   2   82.19   11.20
  -7   5   2   71.09    8.10
  -7   5   2   69.69    9.30
  -7   5   2   83.19    9.80
  -7   5   2   53.89    7.10
  -7   5   2   63.19    8.60
   6  -5  -2    6.90    4.10
  -6  -5   2    1.40    3.90
  -6   5   2    0.90    2.30
  -6   5   2    0.70    3.00
  -6   5   2    2.10    3.00
  -6   5   2    2.10    2.70
  -6   5   2   -2.80    2.50
  -5  -5   2   22.30    5.40
   5  -5  -2   23.80    6.00
  -5   5   2   21.80    5.20
  -5   5   2   40.00    6.10
  -5   5   2   29.60    5.20
  -5   5   2   27.20    5.00
  -5   5   2   15.70    4.20
  -4  -5   2   13.00    4.30
   4  -5  -2   18.40    4.70
   4  -5  -2   14.80    4.40
  -4   5   2   12.70    3.60
  -4   5   2   11.00    3.80
  -4   5   2   20.40    3.70
  -4   5   2   20.40    4.10
  -4   5   2   24.60    4.90
   3  -5  -2  197.48   11.70
  -3  -5   2  189.78    7.60
   3  -5  -2  180.88   11.40
  -3   5   2  179.68   10.70
  -3   5   2  204.08   11.10
  -3   5   2  181.88   11.20
  -3   5   2  208.58    9.00
  -2  -5   2  232.98    9.50
   2  -5  -2  229.08   12.30
  -2  -5   2  222.98    8.40
  -2  -5   2  212.78    8.40
   2  -5  -2  238.08   12.40
  -2   5   2  217.08   11.60
   2   5  -2  224.18    9.00
   2   5  -2  235.08   10.40
  -2   5   2  224.18    8.80
   2   5  -2  224.08    9.10
  -2   5   2  223.98   11.80
  -2   5   2  239.18   11.80
   1  -5  -2   98.39    6.90
   1  -5  -2  105.09    7.70
  -1  -5   2  113.09    6.60
  -1  -5   2  107.09    5.70
  -1  -5   2   86.39    6.10
  -1  -5   2  114.59    5.90
   1  -5  -2  112.39    8.10
   1   5  -2  107.89    6.10
  -1   5   2  117.89    7.90
   1   5  -2  111.99    6.20
   1   5  -2  106.39    6.30
  -1   5   2  122.59    7.70
   0  -5  -2  361.06   16.60
   0  -5  -2  359.56   16.10
   0  -5   2  392.76   16.20
   0  -5   2  392.56   15.80
   0  -5   2  368.36   15.30
   0  -5  -2  391.26   15.90
   0  -5   2  407.06   15.50
   0   5   2  364.76   16.10
   0   5  -2  361.76   15.70
   0   5  -2  406.96   15.70
   0   5   2  392.16   16.10
   0   5  -2  393.76   15.40
   1  -5   2  135.29    7.70
  -1  -5  -2  115.49    7.30
  -1  -5  -2  111.39    7.00
   1  -5   2  113.49    7.90
  -1  -5  -2  127.19    8.00
   1  -5   2  127.69    8.30
  -1  -5  -2  117.59    6.90
  -1  -5  -2  111.29    7.10
   1   5   2  130.59    7.60
  -1   5  -2  133.49    8.00
  -1   5  -2  129.79    8.10
   1   5   2  126.49    7.50
  -1   5  -2  127.29    7.60
   2  -5   2    8.70    3.30
   2  -5   2    3.60    3.40
  -2  -5  -2    7.70    2.40
  -2  -5  -2    4.00    2.20
  -2  -5  -2    6.10    2.90
  -2  -5  -2    4.80    2.20
  -2  -5  -2    8.90    2.80
  -2  -5  -2    7.60    2.30
   2  -5   2    6.00    3.20
  -2   5  -2   -0.40    2.30
   2   5   2    7.30    2.70
  -2   5  -2    3.30    2.80
  -2   5  -2    8.10    3.40
   2   5   2    4.70    2.40
  -3  -5  -2  115.99    6.80
  -3  -5  -2  119.79    7.60
  -3  -5  -2  119.79    7.70
  -3  -5  -2  118.19    6.70
  -3  -5  -2  119.99    7.60
   3  -5   2  127.19    9.30
  -3  -5  -2  102.39    7.70
   3  -5   2  122.29    9.20
  -3   5  -2  112.49    8.10
  -3   5  -2  117.99    8.60
   3   5   2  120.89    7.10
   3   5   2  114.99    7.10
  -3   5  -2  124.39    8.70
  -3   5  -2  125.99    8.80
  -4  -5  -2   90.79    6.50
  -4  -5  -2   89.79    4.30
  -4  -5  -2   84.19    8.10
  -4  -5  -2   89.49    6.40
   4  -5   2   74.89    8.30
  -4  -5  -2   83.69    7.90
  -4  -5  -2  100.19    9.10
   4  -5   2   75.99    8.30
  -4  -5  -2   87.29    5.70
  -4  -5  -2   75.49    5.60
  -4   5  -2   84.69    8.70
  -4   5  -2   88.19    8.70
  -4   5  -2   91.89    9.30
  -4   5  -2   74.09    7.90
   4   5   2   87.39    6.00
   4   5   2   79.79    6.00
  -5  -5  -2   61.89    7.50
   5  -5   2   30.60    6.10
  -5  -5  -2   51.79    7.20
  -5  -5  -2   39.00    4.50
  -5  -5  -2   43.70    4.70
   5  -5   2   31.20    5.90
  -5  -5  -2   37.30    6.30
  -5  -5  -2   49.30    5.50
  -5  -5  -2   34.60    5.00
  -5   5  -2   38.20    6.50
  -5   5  -2   49.10    6.80
  -5   5  -2   55.79    7.40
  -5   5  -2   48.70    6.90
   5   5   2   41.60    4.80
  -5   5  -2   32.30    6.10
   5   5   2   47.50    5.30
  -6  -5  -2   33.70    5.10
  -6  -5  -2   38.00    4.80
  -6  -5  -2   41.90    7.20
   6  -5   2   39.10    6.80
   6  -5   2   36.50    7.20
  -6  -5  -2   27.90    4.20
  -6   5  -2   26.50    5.10
  -6   5  -2   31.80    5.60
  -6   5  -2   25.20    5.70
   6   5   2   46.20    5.70
  -6   5  -2   34.60    6.80
  -6   5  -2   30.30    5.80
  -7  -5  -2   85.99    7.80
  -7  -5  -2   91.49   11.10
  -7  -5  -2   85.09    8.20
   7  -5   2   76.49   10.30
   7  -5   2   82.89   10.50
  -7  -5  -2   94.49    7.10
  -7   5  -2   98.09   11.60
  -7   5  -2   81.79    9.70
   7   5   2   87.49    8.20
  -7   5  -2   79.69   10.60
  -7   5  -2   93.49   10.20
  -8  -5  -2   50.19    6.40
  -8  -5  -2   55.49    6.60
   8  -5   2   55.99    9.30
  -8  -5  -2   50.79    6.70
  -8   5  -2   53.09    9.50
  -8   5  -2   46.70    7.50
  -8   5  -2   56.39    9.30
  -8   5  -2   43.30    8.30
   9  -5   2    8.10    5.90
  -9  -5  -2    4.10    3.80
  -9  -5  -2    1.90    3.30
  -9  -5  -2    1.80    3.10
  -9   5  -2    4.10    4.90
  -9   5  -2    7.20    4.30
  -9   5  -2    2.80    5.40
  10  -5   2   -2.80    5.60
 -10  -5  -2   -1.30    3.30
 -10  -5  -2    3.90    4.00
 -10  -5  -2    2.50    4.00
 -10   5  -2    1.70    6.10
 -10   5  -2    6.00    4.40
 -10   5  -2   -2.70    4.60
  11  -5   2   15.90    7.70
 -11  -5  -2    9.20    4.90
 -11  -5  -2    8.90    4.30
 -11  -5  -2    5.80    4.70
 -11   5  -2    6.00    7.50
 -11   5  -2   16.70    7.80
  12  -5   2    6.40    6.40
 -12  -5  -2   -3.10    4.10
 -12  -5  -2   -3.70    4.00
 -12   5  -2   -6.80    5.70
 -12   5  -2   -4.10    5.60
 -13  -5  -2   10.30    5.60
 -13   5  -2    4.20    7.90
 -13   5  -2   28.00   10.60
 -13  -6   2   31.80    6.90
 -13   6   2   32.80    9.80
 -12  -6   2    0.30    3.20
 -12   6   2   -3.90    6.60
  11  -6  -2   66.99   12.30
 -11  -6   2   68.19    7.50
 -11   6   2   57.89   11.10
  10  -6  -2  213.98   19.80
 -10  -6   2  211.48   11.10
 -10  -6   2  214.58   11.10
 -10   6   2  182.18   18.00
   9  -6  -2   67.59   10.70
  -9  -6   2   62.89    5.50
  -9  -6   2   55.09    5.10
  -9   6   2   40.50    8.10
  -9   6   2   46.80    7.50
  -9   6   2   54.29    9.70
  -8  -6   2   47.40    3.50
   8  -6  -2   41.10    8.30
  -8  -6   2   45.80    3.50
  -8   6   2   51.59    9.00
  -8   6   2   45.90    8.20
  -8   6   2   49.80    7.50
   7  -6  -2  113.79   12.90
  -7  -6   2   78.29   10.40
   7  -6  -2   76.89   10.30
  -7   6   2   78.09   10.10
  -7   6   2  111.99   11.10
  -7   6   2   90.29    9.70
  -7   6   2   77.19    9.30
   6  -6  -2  198.18   14.00
  -6  -6   2  209.88   14.40
  -6   6   2  216.78   13.70
  -6   6   2  199.08   13.70
  -6   6   2  211.18   13.20
  -6   6   2  207.18   12.30
  -6   6   2  197.48   12.80
   5  -6  -2    1.50    2.80
  -5  -6   2    7.20    4.10
   5  -6  -2    4.40    3.70
  -5   6   2    4.90    3.70
  -5   6   2   -1.70    3.00
  -5   6   2    1.30    2.30
  -5   6   2    5.00    3.00
  -5   6   2   10.40    3.80
  -4  -6   2  195.28   12.50
   4  -6  -2  173.38   11.90
  -4  -6   2  180.38    7.30
   4  -6  -2  215.28   12.90
  -4  -6   2  177.88    7.40
  -4   6   2  174.78   11.30
  -4   6   2  183.98   12.00
  -4   6   2  180.98    9.50
  -4   6   2  181.88   11.40
   3  -6  -2 3025.10  100.89
  -3  -6   2 3004.80   97.19
   3  -6  -2 3005.20  101.99
  -3   6   2 3001.00   99.79
   3   6  -2 2950.30   96.09
  -3   6   2 2902.01   99.89
  -3   6   2 2929.01  101.59
  -3   6   2 2949.21   93.19
   3   6  -2 2897.71   95.39
   2  -6  -2   -0.10    2.70
   2  -6  -2    5.90    3.50
  -2  -6   2    4.00    1.50
  -2  -6   2    1.20    1.80
   2   6  -2    0.40    1.60
   2   6  -2    3.40    1.70
  -2   6   2    1.00    1.40
  -2   6   2   -1.00    2.80
  -2   6   2    3.50    3.10
   2   6  -2    1.60    1.90
  -1  -6   2   78.19    5.30
   1  -6  -2   90.19    7.70
  -1  -6   2   77.19    5.20
  -1  -6   2   74.49    5.30
  -1  -6   2   81.99    6.20
   1  -6  -2   88.09    8.30
   1  -6  -2   64.89    7.00
   1   6  -2   95.69    6.00
  -1   6   2   94.69    7.20
   1   6  -2   82.19    5.60
   1   6  -2   77.69    5.60
  -1   6   2   92.59    7.20
   0  -6  -2  175.58    9.70
   0  -6   2  180.38    9.20
   0  -6  -2  163.18    9.20
   0  -6  -2  172.48   10.00
   0  -6   2  178.28    9.50
   0  -6  -2  170.68   10.30
   0  -6   2  168.68    9.00
   0  -6   2  168.68    9.80
   0   6  -2  164.78    9.20
   0   6   2  182.18    9.90
   0   6  -2  164.58    8.90
   0   6  -2  178.18    9.40
   0   6   2  169.88    9.70
  -1  -6  -2  152.78    8.60
   1  -6   2  162.28    9.50
  -1  -6  -2  147.69    8.30
   1  -6   2  148.59    8.80
  -1  -6  -2  145.39    8.60
   1  -6   2  157.48    9.80
  -1  -6  -2  152.48    8.40
  -1  -6  -2  141.49    9.00
   1  -6   2  149.49    8.90
  -1   6  -2  136.49    8.40
   1   6   2  134.69    8.30
  -1   6  -2  141.59    9.00
  -1   6  -2  143.49    9.10
   1   6   2  146.19    8.60
  -2  -6  -2   87.19    6.00
   2  -6   2  105.29    9.50
  -2  -6  -2   85.19    6.20
  -2  -6  -2   84.49    7.50
   2  -6   2   78.79    8.00
  -2  -6  -2   75.09    7.00
  -2  -6  -2   88.09    6.10
   2  -6   2  111.59    9.00
  -2   6  -2   77.99    7.60
  -2   6  -2  103.09    9.20
  -2   6  -2   95.99    8.80
   2   6   2   85.19    6.30
   2   6   2   89.89    6.40
   3  -6   2   54.39    7.10
  -3  -6  -2   58.39    5.20
  -3  -6  -2   48.50    5.50
   3  -6   2   51.29    6.80
  -3  -6  -2   49.99    5.20
  -3  -6  -2   56.09    6.50
   3   6   2   50.49    5.30
  -3   6  -2   50.39    6.70
   3   6   2   60.89    5.80
  -3   6  -2   56.69    7.20
  -3   6  -2   65.79    7.40
  -4  -6  -2  654.33   22.10
  -4  -6  -2  619.44   25.30
   4  -6   2  690.73   28.60
  -4  -6  -2  647.94   25.50
  -4  -6  -2  654.53   24.40
  -4  -6  -2  668.03   24.60
  -4  -6  -2  663.63   26.80
  -4  -6  -2  642.04   26.10
   4  -6   2  639.74   28.40
  -4   6  -2  650.63   27.50
  -4   6  -2  662.63   27.40
   4   6   2  668.73   24.90
  -4   6  -2  653.43   28.20
  -4   6  -2  660.53   27.30
   4   6   2  633.64   24.70
  -5  -6  -2  156.18   10.50
  -5  -6  -2  131.69    8.60
   5  -6   2  155.78   13.80
   5  -6   2  131.49   12.40
  -5  -6  -2  140.99   10.40
  -5  -6  -2  143.99    8.80
  -5  -6  -2  157.98    8.30
  -5  -6  -2  148.69    8.40
  -5   6  -2  163.88   11.80
   5   6   2  140.19    8.10
  -5   6  -2  134.59   12.30
   5   6   2  146.09    8.50
  -5   6  -2  133.19   10.50
  -5   6  -2  139.89   10.50
  -5   6  -2  130.09   10.00
  -6  -6  -2   14.80    3.40
  -6  -6  -2   12.30    3.60
   6  -6   2    7.10    4.60
   6  -6   2   24.20    6.20
  -6  -6  -2   13.50    4.70
  -6  -6  -2   20.60    3.70
  -6   6  -2   22.20    5.70
  -6   6  -2   24.00    6.10
  -6   6  -2   10.10    4.10
  -6   6  -2    3.90    3.50
   6   6   2   21.00    4.20
  -7  -6  -2  110.79    7.90
   7  -6   2   85.69   11.30
  -7  -6  -2  108.29    7.90
  -7  -6  -2   99.89    7.90
  -7   6  -2  103.39   12.10
  -7   6  -2   95.49   10.80
  -7   6  -2  130.29   13.20
  -7   6  -2  102.79   11.60
   8  -6   2  305.07   20.00
  -8  -6  -2  322.27   15.50
  -8  -6  -2  314.57   15.80
  -8  -6  -2  318.47   15.80
  -8   6  -2  329.97   19.80
  -8   6  -2  306.37   17.90
  -8   6  -2  318.77   20.20
  -9  -6  -2    0.40    2.90
   9  -6   2   -4.50    4.60
  -9  -6  -2    1.00    2.90
  -9  -6  -2   -0.50    3.00
  -9   6  -2    0.00    3.80
  -9   6  -2   -3.60    4.30
  -9   6  -2    0.10    4.90
 -10  -6  -2   25.40    5.80
  10  -6   2   32.20    8.20
 -10  -6  -2   28.40    6.00
 -10  -6  -2   24.20    5.60
 -10   6  -2   33.10    9.20
 -10   6  -2   32.40    7.40
 -10   6  -2   25.50    8.10
 -11  -6  -2   38.60    6.90
 -11  -6  -2   20.00    6.00
  11  -6   2   30.00    9.50
 -11  -6  -2   29.40    6.30
 -11   6  -2   59.69   12.10
 -11   6  -2   46.60   10.50
  12  -6   2   35.50   11.20
 -12  -6  -2   39.30    8.10
 -12   6  -2   31.50    9.80
 -12   6  -2   16.70    9.00
  12  -7  -2   45.00   11.30
 -12  -7   2   54.09    7.50
 -12  -7   2   52.09    7.00
 -12   7   2   60.59   12.50
 -11  -7   2   -0.80    2.50
  11  -7  -2    0.90    5.80
 -11   7   2    2.20    5.80
  10  -7  -2    9.80    7.00
 -10  -7   2    6.10    2.70
 -10   7   2   -2.50    4.90
 -10   7   2    6.90    5.00
  -9  -7   2  121.29    6.60
   9  -7  -2  128.99   14.90
  -9  -7   2  107.09    6.60
  -9   7   2  113.29   14.10
  -9   7   2  137.29   13.30
   8  -7  -2   91.59   12.50
  -8  -7   2  106.59   13.70
  -8  -7   2   97.19    4.90
  -8   7   2   99.29   12.40
  -8   7   2  117.39   11.60
  -8   7   2  126.99   13.00
   7  -7  -2  589.84   29.40
  -7  -7   2  643.94   30.30
   7  -7  -2  591.64   28.70
  -7   7   2  583.64   28.20
  -7   7   2  569.34   28.80
  -7   7   2  602.64   27.40
  -7   7   2  615.04   26.40
  -6  -7   2    5.10    4.50
   6  -7  -2   -5.80    3.60
   6  -7  -2    0.10    3.60
  -6   7   2    0.20    3.00
  -6   7   2    2.90    3.50
  -6   7   2   -0.50    3.00
  -6   7   2    0.20    3.10
   5  -7  -2   17.60    5.70
  -5  -7   2   25.20    6.20
   5  -7  -2   32.80    6.40
  -5  -7   2   29.80    2.30
  -5  -7   2   28.90    2.50
   5   7  -2   23.40    2.30
  -5   7   2   16.50    4.00
  -5   7   2   25.50    6.10
  -5   7   2   35.80    6.40
  -5   7   2   28.40    6.10
  -4  -7   2   28.70    6.00
  -4  -7   2   27.40    3.00
  -4  -7   2   22.20    2.70
   4  -7  -2   16.30    4.90
   4  -7  -2   20.40    5.50
  -4   7   2   22.10    5.50
  -4   7   2   24.70    5.40
  -4   7   2   26.30    4.20
  -4   7   2   20.40    5.10
   4   7  -2   25.70    2.70
   3  -7  -2  917.21   35.80
  -3  -7   2  898.01   31.20
  -3  -7   2  829.52   29.60
   3  -7  -2  903.31   35.50
  -3  -7   2  858.71   31.30
   3   7  -2  865.41   31.40
  -3   7   2  921.51   30.00
  -3   7   2  862.21   34.50
   3   7  -2  855.21   30.40
  -3   7   2  917.11   34.80
  -3   7   2  862.41   35.20
  -2  -7   2  151.28    7.50
   2  -7  -2  157.98    9.90
  -2  -7   2  157.68    7.50
   2  -7  -2  143.89   10.50
  -2  -7   2  151.08    5.90
   2  -7  -2  155.98   10.50
  -2  -7   2  140.19    8.00
   2   7  -2  156.08    8.00
   2   7  -2  145.39    7.90
  -2   7   2  141.79    6.20
   2   7  -2  139.79    7.50
  -2   7   2  133.69    9.70
  -2   7   2  136.29    9.90
  -1  -7   2    1.60    2.00
  -1  -7   2    7.50    2.40
  -1  -7   2    3.10    1.90
   1  -7  -2    4.50    3.10
   1  -7  -2   10.30    3.40
   1  -7  -2    0.90    3.20
  -1   7   2    3.70    2.80
   1   7  -2   -0.30    1.80
   1   7  -2    4.00    2.40
  -1   7   2    4.50    3.10
   1   7  -2    0.80    2.10
   0  -7   2   -0.70    2.30
   0  -7  -2    5.80    3.40
   0  -7   2    1.70    2.70
   0  -7  -2    4.30    3.10
   0  -7  -2    3.60    2.30
   0  -7   2    1.30    1.80
   0  -7   2    3.20    2.20
   0  -7  -2   -0.30    1.90
   0   7   2    5.90    3.00
   0   7  -2    0.60    2.20
   0   7   2    5.60    2.90
   0   7  -2    3.40    2.80
   0   7  -2   -2.10    2.10
   1  -7   2    0.50    2.30
  -1  -7  -2   -3.40    2.10
  -1  -7  -2    1.60    1.90
   1  -7   2    6.10    3.20
   1  -7   2   -1.30    2.70
  -1  -7  -2   -0.60    2.10
   1  -7   2    0.30    1.00
   1  -7   2    0.20    2.20
  -1  -7  -2    0.20    1.90
  -1  -7  -2    2.90    2.40
  -1   7  -2   -0.80    2.50
   1   7   2    0.40    2.00
  -1   7  -2   -2.70    2.20
   1   7   2   -1.10    2.30
  -1   7  -2    1.60    2.70
  -2  -7  -2   73.49    6.70
  -2  -7  -2   77.89    6.00
   2  -7   2   62.59    7.40
   2  -7   2   66.49    8.10
  -2  -7  -2   65.59    7.00
   2  -7   2   69.69    7.30
  -2  -7  -2   64.09    6.10
  -2  -7  -2   77.59    7.00
  -2   7  -2   62.69    7.40
  -2   7  -2   89.29    8.20
  -2   7  -2   86.39    8.60
   2   7   2   73.89    6.70
   2   7   2   78.99    7.00
   3  -7   2    9.00    4.30
   3  -7   2    1.70    3.40
  -3  -7  -2   12.60    2.90
  -3  -7  -2    9.10    2.70
  -3  -7  -2   15.90    3.50
   3  -7   2   12.60    3.90
  -3  -7  -2   13.30    3.70
  -3   7  -2    3.10    3.40
   3   7   2   11.50    3.10
  -3   7  -2   10.10    3.90
   3   7   2    7.70    2.80
  -3   7  -2   11.70    4.10
   4  -7   2   64.69    8.50
  -4  -7  -2   73.89    5.80
  -4  -7  -2   71.89    6.60
  -4  -7  -2   71.19    7.00
  -4  -7  -2   68.59    7.70
  -4  -7  -2   75.49    3.70
  -4  -7  -2   84.19    8.90
   4  -7   2   66.49    9.00
   4   7   2   70.29    6.50
  -4   7  -2   71.09    8.40
  -4   7  -2   71.49    7.90
  -4   7  -2   72.19    8.80
   4   7   2   85.39    6.50
  -4   7  -2   97.59   10.30
  -5  -7  -2   68.29    8.60
  -5  -7  -2   79.49    6.80
   5  -7   2   93.09   11.00
   5  -7   2   82.19   10.20
  -5  -7  -2   83.49    6.50
  -5  -7  -2   86.09    6.80
  -5  -7  -2   97.49   10.20
  -5  -7  -2   72.29    7.40
  -5   7  -2   73.79    8.90
   5   7   2   82.59    6.50
  -5   7  -2   81.79    9.60
  -5   7  -2   82.79    8.90
  -5   7  -2  105.19   11.40
  -5   7  -2   74.19    9.30
  -6  -7  -2   67.69    6.70
  -6  -7  -2   64.79    7.00
  -6  -7  -2   55.39    6.10
   6  -7   2   67.89    9.50
  -6  -7  -2   66.29    8.90
   6   7   2   71.99    7.00
  -6   7  -2   67.39    9.00
  -6   7  -2   73.29   10.50
  -6   7  -2   74.59    8.90
  -7  -7  -2   26.40    4.80
  -7  -7  -2   18.50    4.10
   7  -7   2   28.70    7.30
  -7  -7  -2   28.30    7.00
  -7  -7  -2   18.60    4.20
  -7   7  -2   32.90    6.90
  -7   7  -2   27.70    7.30
  -7   7  -2   11.80    5.40
   8  -7   2    9.90    5.30
  -8  -7  -2   17.00    4.10
  -8  -7  -2    8.70    3.60
  -8  -7  -2   11.80    3.80
  -8   7  -2    5.80    4.80
  -8   7  -2   18.40    6.90
  -8   7  -2   18.10    6.80
  -9  -7  -2   -0.40    2.70
   9  -7   2    8.10    5.80
  -9  -7  -2   -2.80    2.50
  -9  -7  -2    2.00    3.30
  -9   7  -2    2.50    4.40
  -9   7  -2   -0.20    5.10
  -9   7  -2   -4.80    4.60
 -10  -7  -2    4.10    3.60
 -10  -7  -2    2.80    3.20
  10  -7   2   -3.20    6.20
 -10  -7  -2    3.50    3.60
 -10   7  -2   -3.10    4.60
 -10   7  -2    0.60    4.70
 -10   7  -2    3.30    5.80
 -11  -7  -2    7.20    4.20
 -11  -7  -2    2.10    3.80
 -11  -7  -2    2.80    4.00
  11  -7   2    1.30    6.50
 -11   7  -2   -2.90    6.20
 -11   7  -2    1.20    6.50
  12  -7   2   -6.30    5.60
 -12  -7  -2    4.40    4.60
 -12   7  -2   -3.00    6.80
 -12   7  -2  -10.40    5.30
  12  -8  -2   -6.20    5.40
 -12  -8   2    4.80    3.60
 -12  -8   2    2.90    3.30
 -12   8   2    7.00    8.50
 -11  -8   2   34.10    5.10
 -11  -8   2   38.90    5.70
  11  -8  -2   32.50    9.90
 -11   8   2   23.00    8.70
  10  -8  -2   -4.90    4.90
 -10  -8   2    2.10    2.60
 -10  -8   2    5.30    2.50
 -10   8   2    0.20    5.40
 -10   8   2    7.20    5.10
   9  -8  -2   -3.80    4.50
  -9  -8   2    2.50    5.60
  -9  -8   2    0.80    1.80
  -9   8   2    3.20    4.60
  -9   8   2   -2.60    3.60
   8  -8  -2   13.60    6.90
  -8  -8   2   21.30    7.30
  -8   8   2   19.70    5.90
  -8   8   2   10.80    5.50
  -8   8   2   24.40    6.50
   7  -8  -2   45.20    8.70
   7  -8  -2   27.00    7.70
  -7  -8   2   43.50    9.10
  -7   8   2   39.30    7.60
  -7   8   2   53.49    8.90
  -7   8   2   53.19    7.80
   6  -8  -2   24.60    7.00
   6  -8  -2   21.20    6.40
  -6  -8   2   32.30    7.10
  -6   8   2   33.70    7.20
  -6   8   2   26.20    5.20
  -6   8   2   18.80    5.50
  -5  -8   2    0.30    1.50
   5  -8  -2   -1.40    3.90
  -5  -8   2    1.30    1.30
   5  -8  -2   -1.80    3.70
  -5  -8   2   -0.40    3.80
  -5   8   2   -3.20    2.00
  -5   8   2    0.40    3.10
  -5   8   2    6.60    3.90
  -5   8   2   -1.20    3.40
  -4  -8   2   91.89    5.80
   4  -8  -2  111.29   11.30
   4  -8  -2   95.49   11.10
  -4  -8   2   81.29    4.80
  -4  -8   2   88.99    5.60
  -4  -8   2   88.99    4.80
  -4   8   2   90.89    6.50
   4   8  -2   89.39    5.30
  -4   8   2   95.59   10.00
   4   8  -2   93.39    6.80
  -4   8   2  111.99   11.20
  -4   8   2   86.29    9.60
  -3  -8   2   11.40    2.50
  -3  -8   2   19.30    3.70
   3  -8  -2   13.90    5.10
  -3  -8   2   12.40    2.80
   3  -8  -2   19.90    5.60
  -3  -8   2   21.60    2.90
   3   8  -2   14.60    2.60
   3   8  -2   17.60    3.50
  -3   8   2   12.80    4.40
  -3   8   2   18.60    5.10
   3   8  -2   14.30    2.80
  -3   8   2   23.20    3.20
  -2  -8   2   -1.00    1.20
  -2  -8   2    1.30    1.70
   2  -8  -2   -3.20    2.30
  -2  -8   2    0.00    1.70
   2  -8  -2    1.10    3.30
   2  -8  -2   -2.10    2.90
   2   8  -2   -0.70    1.80
   2   8  -2    1.20    1.80
   2   8  -2    3.90    2.00
  -2   8   2   -3.20    2.70
  -2   8   2   -3.40    2.60
  -1  -8   2   14.30    3.10
  -1  -8   2   11.20    3.20
  -1  -8   2   14.80    3.30
   1  -8  -2   18.90    5.00
   1  -8  -2   15.40    3.90
   1  -8  -2   21.90    5.20
  -1   8   2   18.30    4.60
   1   8  -2   22.70    4.20
  -1   8   2   19.00    4.70
   1   8  -2   30.30    4.10
   1   8  -2   24.50    4.20
   0  -8  -2   43.00    6.30
   0  -8  -2   39.40    5.30
   0  -8   2   43.20    5.70
   0  -8   2   49.70    5.90
   0  -8   2   50.99    5.80
   0  -8  -2   38.60    5.90
   0  -8  -2   57.39    6.80
   0   8   2   36.90    5.60
   0   8  -2   52.29    5.50
   0   8  -2   51.49    6.20
   0   8  -2   41.80    5.80
   0   8   2   53.29    6.80
  -1  -8  -2   68.59    7.00
   1  -8   2   74.39    8.30
   1  -8   2   78.89    7.60
  -1  -8  -2   83.89    7.30
  -1  -8  -2   94.49    8.40
  -1  -8  -2   78.99    8.00
   1  -8   2   83.49    8.30
  -1  -8  -2   75.19    8.20
  -1   8  -2   65.29    6.90
  -1   8  -2   90.19    8.80
   1   8   2   60.49    6.90
   1   8   2   73.19    7.50
  -1   8  -2   55.79    6.90
  -2  -8  -2  232.48   11.90
  -2  -8  -2  224.58   11.60
  -2  -8  -2  232.88   11.40
   2  -8   2  202.98   13.30
  -2  -8  -2  212.48   11.20
  -2  -8  -2  223.58   12.70
   2  -8   2  228.88   12.90
  -2   8  -2  204.68   12.70
   2   8   2  211.68   11.70
   2   8   2  239.18   12.00
  -2   8  -2  233.38   13.30
  -2   8  -2  214.28   12.20
   3  -8   2   84.99    9.50
  -3  -8  -2   70.99    7.30
  -3  -8  -2   67.29    6.80
   3  -8   2   76.99    9.40
  -3  -8  -2   60.79    6.10
   3  -8   2   78.79    8.50
  -3  -8  -2   68.99    7.50
  -3   8  -2   57.69    7.60
   3   8   2   72.89    7.00
  -3   8  -2   62.99    8.00
   3   8   2   73.79    7.00
  -3   8  -2   50.29    7.20
   4  -8   2   95.89   10.50
  -4  -8  -2  120.29    7.80
  -4  -8  -2  122.89    9.00
  -4  -8  -2  124.99    8.50
  -4  -8  -2  104.99    7.40
  -4  -8  -2  116.49    9.30
   4   8   2  108.89    7.50
   4   8   2  103.79    7.70
  -4   8  -2  148.59   13.00
  -4   8  -2  124.29   11.70
  -4   8  -2   90.29   10.30
  -5  -8  -2  163.48    9.30
  -5  -8  -2  149.39   11.10
  -5  -8  -2  148.29    9.70
  -5  -8  -2  162.38   11.50
   5  -8   2  144.29   13.90
  -5  -8  -2  161.38    9.30
  -5   8  -2  153.38   10.90
  -5   8  -2  161.08   12.30
  -5   8  -2  153.48   14.20
  -5   8  -2  171.18   12.40
   5   8   2  138.09    9.20
   6  -8   2   24.60    7.30
  -6  -8  -2   18.30    5.90
  -6  -8  -2   10.60    3.30
  -6  -8  -2   20.90    4.40
  -6  -8  -2   16.50    3.80
  -6   8  -2   22.40    5.60
  -6   8  -2   19.30    6.00
   6   8   2   18.40    4.10
  -6   8  -2   17.40    6.20
  -7  -8  -2   80.99    7.80
  -7  -8  -2   88.39    8.20
   7  -8   2  110.19   13.50
  -7  -8  -2   95.09    8.60
  -7  -8  -2   96.89   12.10
  -7   8  -2   90.39   11.20
  -7   8  -2  107.39   13.00
  -7   8  -2   88.89   11.00
   8  -8   2   55.69   10.60
  -8  -8  -2   68.89    7.60
  -8  -8  -2   65.49    7.40
  -8  -8  -2   64.39    7.60
  -8   8  -2   75.59   10.80
  -8   8  -2   38.80    8.50
  -8   8  -2   82.89   11.70
  -9  -8  -2   -1.50    2.70
  -9  -8  -2   -1.20    3.20
   9  -8   2    2.30    6.00
  -9  -8  -2   -2.90    2.60
  -9   8  -2   -1.20    4.10
  -9   8  -2    6.60    6.10
  -9   8  -2   -2.40    4.80
 -10  -8  -2   23.10    5.80
  10  -8   2   12.50    7.40
 -10  -8  -2   16.20    4.80
 -10  -8  -2   17.40    4.80
 -10   8  -2   12.80    5.90
 -10   8  -2   25.10    8.60
 -10   8  -2   23.90    8.30
 -11  -8  -2   21.50    5.80
  11  -8   2   23.20    8.70
 -11  -8  -2    9.00    4.70
 -11   8  -2   13.00    7.80
 -11   8  -2   18.00    8.20
 -11   8  -2   10.40    6.70
  12  -8   2   -4.90    6.10
 -12  -8  -2    2.10    4.30
 -12   8  -2    1.00    7.00
 -12   8  -2   -3.70    7.00
 -12  -9   2   23.50    5.00
 -12  -9   2   19.20    4.80
  12  -9  -2   31.50   11.00
 -12   9   2   36.20   11.20
 -11  -9   2   10.30    3.60
 -11  -9   2    7.30    3.40
  11  -9  -2   -4.90    6.50
 -11   9   2    6.70    7.30
  10  -9  -2   20.80    8.30
 -10  -9   2    4.40    2.60
 -10  -9   2   13.40    3.00
 -10   9   2   10.30    5.90
 -10   9   2   11.40    7.20
  -9  -9   2  137.69    7.30
  -9  -9   2  109.99   15.10
  -9  -9   2  130.19    7.30
   9  -9  -2  107.89   15.10
  -9   9   2  127.69   16.30
  -9   9   2  161.48   15.80
  -8  -9   2   56.49    4.10
  -8  -9   2   67.99   11.90
   8  -9  -2   68.69   12.00
  -8  -9   2   58.09    4.10
  -8   9   2   58.69   11.20
  -8   9   2   71.29   10.50
  -8   9   2   70.99    9.50
  -7  -9   2   15.40    6.70
   7  -9  -2   -2.20    5.00
  -7  -9   2    8.10    1.80
   7  -9  -2   11.70    6.10
  -7   9   2    4.70    4.30
  -7   9   2    4.70    4.80
  -7   9   2   11.60    5.40
  -6  -9   2   -0.70    4.60
   6  -9  -2   -4.20    4.30
  -6  -9   2    5.10    1.70
   6  -9  -2   10.60    5.50
  -6  -9   2    9.60    1.90
  -6  -9   2    4.30    1.70
  -6   9   2    5.40    3.70
  -6   9   2    3.90    4.60
  -6   9   2    8.70    4.70
   5  -9  -2  241.18   16.20
  -5  -9   2  228.38    9.80
  -5  -9   2  237.48   11.10
  -5  -9   2  238.18    9.90
  -5  -9   2  245.08   16.50
  -5  -9   2  242.28   10.70
   5  -9  -2  233.68   16.30
   5   9  -2  236.68   12.30
  -5   9   2  217.28   14.90
  -5   9   2  222.38   12.10
  -5   9   2  228.68   15.80
   4  -9  -2   64.49    9.50
  -4  -9   2   66.09    6.00
  -4  -9   2   65.19    4.70
   4  -9  -2   47.90    8.00
  -4  -9   2   64.19    5.70
  -4  -9   2   58.79    4.70
  -4   9   2   72.09    6.50
   4   9  -2   55.89    5.40
  -4   9   2   51.39    8.30
  -4   9   2   52.09    8.20
   4   9  -2   81.49    7.20
   3  -9  -2    6.70    4.40
  -3  -9   2    5.90    2.40
  -3  -9   2    8.00    2.50
   3  -9  -2    8.10    4.30
  -3  -9   2    7.20    2.50
   3  -9  -2    7.30    4.30
  -3  -9   2    6.90    3.00
   3   9  -2    5.60    2.40
   3   9  -2    4.50    2.50
  -3   9   2    4.80    4.00
  -3   9   2    9.90    2.40
   3   9  -2    9.70    2.50
  -3   9   2    2.70    3.20
  -2  -9   2    4.40    1.90
  -2  -9   2    7.10    2.50
   2  -9  -2    2.30    3.10
   2  -9  -2    9.70    4.10
  -2  -9   2    3.70    2.30
   2  -9  -2    2.10    3.70
   2   9  -2    7.30    2.60
   2   9  -2    4.10    2.40
  -2   9   2   -0.40    2.90
   2   9  -2    1.30    2.30
  -2   9   2    4.10    3.50
  -1  -9   2  647.54   26.30
   1  -9  -2  645.34   29.10
   1  -9  -2  681.13   28.80
  -1  -9   2  699.93   26.10
  -1  -9   2  659.33   26.30
   1  -9  -2  697.13   28.10
  -1   9   2  747.83   29.10
   1   9  -2  673.93   25.40
   1   9  -2  686.13   26.90
  -1   9   2  612.64   28.10
   1   9  -2  689.43   27.00
   0  -9  -2  216.28   13.30
   0  -9  -2  201.68   12.50
   0  -9   2  229.18   12.30
   0  -9   2  215.68   12.00
   0  -9  -2  200.68   12.20
   0  -9   2  207.08   11.70
   0  -9  -2  224.38   12.50
   0   9  -2  204.08   12.10
   0   9  -2  209.38   11.00
   0   9   2  218.78   12.70
   0   9  -2  236.18   12.60
   0   9   2  190.88   12.30
  -1  -9  -2    8.70    4.00
   1  -9   2   10.30    4.10
   1  -9   2    9.30    3.60
  -1  -9  -2    7.60    3.00
  -1  -9  -2   11.60    3.40
  -1  -9  -2    8.10    3.10
  -1  -9  -2   12.60    3.70
   1  -9   2    8.30    3.90
  -1   9  -2   13.20    3.80
   1   9   2   13.50    4.20
   1   9   2   15.10    4.10
  -1   9  -2   15.00    4.30
  -1   9  -2   12.80    4.10
  -2  -9  -2  333.97   15.50
  -2  -9  -2  322.77   15.70
  -2  -9  -2  316.47   14.90
  -2  -9  -2  325.77   14.90
  -2  -9  -2  319.67   16.40
   2  -9   2  349.27   17.10
   2  -9   2  326.37   17.60
   2   9   2  327.77   15.80
  -2   9  -2  316.77   15.90
   2   9   2  328.17   15.70
  -2   9  -2  290.97   16.80
  -2   9  -2  289.67   16.40
  -3  -9  -2  203.88    9.80
   3  -9   2  198.38   12.70
   3  -9   2  166.08   13.00
  -3  -9  -2  181.68   10.80
  -3  -9  -2  198.38   10.90
  -3  -9  -2  189.68   11.70
  -3  -9  -2  188.98   11.10
  -3   9  -2  199.18   13.40
   3   9   2  181.98   10.90
  -3   9  -2  197.58   12.30
   3   9   2  197.38   11.30
  -3   9  -2  193.08   13.00
  -4  -9  -2   -1.60    2.30
  -4  -9  -2    3.70    2.50
  -4  -9  -2    2.60    2.50
   4  -9   2   -1.20    3.80
  -4  -9  -2    0.90    2.70
   4   9   2    2.50    2.70
  -4   9  -2    0.00    3.50
  -4   9  -2    1.10    3.40
  -4   9  -2    0.50    3.30
  -5  -9  -2  153.48    9.70
  -5  -9  -2  147.29   13.80
  -5  -9  -2  169.38   10.50
  -5  -9  -2  154.98    9.80
   5  -9   2  143.39   14.90
  -5  -9  -2  159.58   11.50
  -5   9  -2  175.08   11.60
   5   9   2  164.88   10.20
  -5   9  -2  159.18   12.50
  -5   9  -2  154.98   14.50
  -5   9  -2  163.98   15.40
  -6  -9  -2  111.79    8.40
  -6  -9  -2  107.59    8.40
   6  -9   2  115.99   13.30
  -6  -9  -2  122.79    8.50
  -6  -9  -2  126.19   13.20
  -6   9  -2  127.09   12.30
  -6   9  -2  125.09   14.30
  -6   9  -2  117.19   12.70
  -7  -9  -2   85.79    8.40
   7  -9   2   76.69   12.10
  -7  -9  -2   90.69    8.90
  -7  -9  -2   96.69    9.10
  -7  -9  -2   83.19   11.60
  -7   9  -2   90.29   11.40
  -7   9  -2   95.69   13.10
  -7   9  -2   83.99   11.10
  -8  -9  -2    5.90    3.00
  -8  -9  -2    2.60    5.00
  -8  -9  -2    4.10    2.90
  -8  -9  -2    3.70    3.50
   8  -9   2    2.00    5.30
  -8   9  -2   -0.70    5.00
  -8   9  -2    3.90    5.20
  -8   9  -2   -7.00    4.80
  -9  -9  -2   95.69    9.40
   9  -9   2  101.59   14.40
  -9  -9  -2   96.89    9.30
  -9  -9  -2   93.19    9.90
  -9   9  -2   96.49   13.00
  -9   9  -2   65.39   11.60
  -9   9  -2  100.29   13.10
 -10  -9  -2   55.89    8.10
 -10  -9  -2   46.90    7.30
 -10  -9  -2   39.20    7.00
  10  -9   2   42.30   11.50
 -10   9  -2   31.20    9.90
 -10   9  -2   37.00    9.00
 -10   9  -2   52.89   10.80
  11  -9   2   -7.70    5.90
 -11  -9  -2   -0.60    3.60
 -11  -9  -2   -1.20    3.70
 -11   9  -2    7.20    6.70
 -11   9  -2    7.00    7.20
 -11   9  -2    1.80    5.80
 -12  -9  -2    5.50    4.50
  12  -9   2    4.20    7.50
 -12   9  -2   -4.50    6.80
 -12   9  -2    3.50    8.00
 -12 -10   2    3.60    3.50
  12 -10  -2    0.00    6.50
 -12 -10   2    0.80    3.10
 -12  10   2   -8.20    7.00
 -11 -10   2    6.50    3.10
 -11 -10   2    1.90    3.00
  11 -10  -2    7.90    8.10
 -11  10   2    2.00    7.20
  10 -10  -2   23.50    9.20
 -10 -10   2   28.00    4.20
 -10 -10   2   27.60    4.40
 -10  10   2   28.00    8.00
 -10  10   2   13.90    7.60
  -9 -10   2   34.80    9.80
  -9 -10   2   29.20    4.10
   9 -10  -2   44.80   10.50
  -9 -10   2   35.80    4.10
  -9  10   2   37.10    8.70
  -9  10   2   31.20    9.20
  -8 -10   2    4.00    1.90
   8 -10  -2    4.40    6.00
  -8 -10   2    3.60    5.70
  -8 -10   2    0.50    1.90
  -8  10   2   -2.50    5.10
  -8  10   2   -2.90    5.00
   7 -10  -2   26.40    7.90
  -7 -10   2   41.50    4.20
  -7 -10   2   33.30    9.00
   7 -10  -2   39.90    9.40
  -7 -10   2   42.50    4.10
  -7  10   2   42.50    8.90
  -7  10   2   51.09   10.20
  -7  10   2   39.90    7.40
  -6 -10   2   13.30    2.70
  -6 -10   2   12.80    2.60
   6 -10  -2    2.90    5.80
  -6 -10   2   19.50    7.40
   6 -10  -2    8.80    5.40
  -6 -10   2   13.80    2.70
  -6  10   2   21.90    5.20
  -6  10   2   14.10    5.80
  -6  10   2    8.20    5.20
  -5 -10   2  339.67   20.00
   5 -10  -2  292.87   19.30
  -5 -10   2  310.47   13.90
  -5 -10   2  318.57   13.40
   5 -10  -2  314.57   19.70
  -5 -10   2  313.47   13.30
  -5  10   2  304.37   18.80
  -5  10   2  327.07   14.90
  -5  10   2  322.57   19.70
   5  10  -2  304.37   15.90
  -4 -10   2   20.30    3.50
   4 -10  -2   18.00    6.00
  -4 -10   2   23.30    4.10
   4 -10  -2   21.80    6.70
  -4 -10   2   28.70    4.00
   4  10  -2   28.80    4.70
  -4  10   2   21.50    5.70
  -4  10   2   30.90    4.30
  -4  10   2   13.50    5.40
   4  10  -2   19.90    3.80
   3 -10  -2  148.99   14.10
  -3 -10   2  134.69    9.00
  -3 -10   2  128.69    8.10
  -3 -10   2  127.39    8.10
   3 -10  -2  139.29   13.50
   3  10  -2  115.39    7.60
  -3  10   2  121.19    6.80
  -3  10   2  106.89   11.00
  -3  10   2  148.39   13.90
   3  10  -2  116.89    8.00
   2 -10  -2   14.20    5.30
  -2 -10   2   13.70    3.50
  -2 -10   2   15.80    2.90
   2 -10  -2   17.00    5.30
   2 -10  -2   10.40    4.60
  -2 -10   2   14.40    3.80
   2  10  -2   11.40    3.40
   2  10  -2   11.70    3.30
  -2  10   2   18.70    5.00
  -2  10   2   11.60    4.70
   2  10  -2    8.90    3.50
  -1 -10   2    7.00    3.00
   1 -10  -2    9.70    3.60
  -1 -10   2    1.40    2.40
  -1 -10   2    9.90    3.30
   1 -10  -2    4.50    3.90
   1 -10  -2    6.10    3.90
   1  10  -2   15.50    3.40
   1  10  -2   11.70    3.70
  -1  10   2   12.60    4.60
  -1  10   2    9.90    4.30
   1  10  -2    7.50    3.30
   0 -10   2   47.40    6.20
   0 -10   2   54.49    7.10
   0 -10  -2   56.99    7.60
   0 -10   2   61.99    7.50
   0 -10  -2   53.69    7.50
   0 -10  -2   53.39    8.00
   0 -10  -2   58.49    7.10
   0  10   2   45.70    6.80
   0  10  -2   54.39    7.10
   0  10   2   51.69    7.20
   0  10  -2   58.49    6.70
   0  10  -2   51.19    6.90
  -1 -10  -2  129.79    9.80
  -1 -10  -2  151.68    9.00
  -1 -10  -2  155.58   10.30
   1 -10   2  142.29   10.50
  -1 -10  -2  138.19    9.90
  -1 -10  -2  132.39   10.60
   1 -10   2  141.09   10.10
   1 -10   2  136.79   10.70
  -1  10  -2  153.28   10.80
   1  10   2  133.99   10.10
  -1  10  -2  148.19    9.70
   1  10   2  144.59   10.10
  -1  10  -2  136.09   10.60
  -2 -10  -2   -4.70    1.40
  -2 -10  -2    1.80    2.40
  -2 -10  -2    1.20    2.50
  -2 -10  -2    3.10    2.70
  -2 -10  -2   -1.00    3.10
   2 -10   2    1.80    3.80
   2 -10   2   -0.40    2.80
  -2  10  -2   -2.70    2.70
  -2  10  -2    2.70    3.50
   2  10   2    0.90    2.80
   2  10   2    1.30    2.60
  -2  10  -2    3.10    3.50
  -3 -10  -2  146.29    9.50
  -3 -10  -2  153.78    9.90
  -3 -10  -2  123.69    9.10
  -3 -10  -2  139.29    8.10
  -3 -10  -2  131.49   10.10
   3 -10   2  118.69   12.10
   3  10   2  132.19    9.60
  -3  10  -2  136.29   13.10
  -3  10  -2  136.09   10.40
  -3  10  -2  127.89   12.30
   3  10   2  127.39    9.50
  -4 -10  -2   67.29    8.10
  -4 -10  -2   65.89    7.80
  -4 -10  -2   62.49    7.00
  -4 -10  -2   59.39    6.90
   4 -10   2   62.49    9.90
  -4  10  -2   57.79    9.20
  -4  10  -2   74.19    9.70
   4  10   2   66.59    7.60
  -4  10  -2   57.19    8.70
  -5 -10  -2    9.60    4.50
   5 -10   2   14.70    6.40
  -5 -10  -2   17.60    4.60
  -5 -10  -2   28.10    6.70
  -5 -10  -2   20.60    4.50
  -5 -10  -2   14.20    4.10
  -5  10  -2   10.40    5.50
   5  10   2   15.00    4.40
  -5  10  -2   10.20    5.00
  -5  10  -2   13.80    5.00
  -5  10  -2   12.70    5.80
  -6 -10  -2   -3.00    3.90
  -6 -10  -2    9.70    3.90
   6 -10   2   11.50    5.80
  -6 -10  -2    9.40    3.60
  -6 -10  -2    1.30    2.70
  -6  10  -2    8.20    4.60
  -6  10  -2    1.20    5.30
  -6  10  -2    7.50    5.80
  -7 -10  -2    9.70    3.70
  -7 -10  -2    5.30    3.50
   7 -10   2   15.90    7.20
  -7 -10  -2    3.90    4.90
  -7 -10  -2    8.80    3.90
  -7  10  -2   15.00    5.70
  -7  10  -2   18.50    7.30
  -7  10  -2    8.10    5.50
  -8 -10  -2   87.09    9.00
  -8 -10  -2   72.79    8.20
   8 -10   2   78.59   13.80
  -8 -10  -2   84.39    8.50
  -8 -10  -2  108.29   13.80
  -8  10  -2   94.09   12.60
  -8  10  -2   80.79   12.10
  -8  10  -2   62.89   11.30
  -9 -10  -2   -0.10    3.20
   9 -10   2    2.10    6.60
  -9 -10  -2    1.70    3.60
  -9 -10  -2   -3.80    2.40
  -9  10  -2   -5.80    5.30
  -9  10  -2   -3.20    5.00
  -9  10  -2    0.70    5.30
 -10 -10  -2    2.20    3.60
 -10 -10  -2   -2.80    3.30
  10 -10   2    5.70    7.70
 -10  10  -2    3.50    6.60
 -10  10  -2   -1.00    5.60
 -10  10  -2   -2.80    5.60
  11 -10   2   -6.00    6.00
 -11 -10  -2    0.40    3.70
 -11 -10  -2    3.20    4.30
 -11  10  -2    3.20    7.50
 -11  10  -2   -4.90    6.30
 -11  10  -2    3.60    6.30
 -11 -11   2    0.10    2.70
  11 -11  -2   13.00    8.10
 -11 -11   2    1.80    3.00
 -11  11   2   -4.70    5.50
 -11  11   2   11.60    8.20
 -10 -11   2   15.10    3.70
 -10 -11   2   19.10    3.90
  10 -11  -2   15.90    8.10
 -10 -11   2   10.10    7.90
 -10  11   2   19.00    8.00
 -10  11   2   19.00    8.20
   9 -11  -2   70.19   13.00
  -9 -11   2   57.79   12.20
  -9 -11   2   64.29    5.90
  -9 -11   2   55.19    5.60
  -9  11   2   77.99   13.40
  -9  11   2   50.89   10.10
   8 -11  -2   -0.90    5.70
  -8 -11   2    1.10    2.20
   8 -11  -2   -6.00    4.70
  -8 -11   2    3.70    2.20
  -8 -11   2    5.80    6.40
  -8  11   2    6.80    6.20
  -8  11   2    2.70    5.80
  -7 -11   2   29.60    8.40
   7 -11  -2   12.60    6.30
   7 -11  -2   17.90    6.80
  -7 -11   2   11.50    2.90
  -7 -11   2   12.20    2.90
  -7  11   2    9.20    5.80
  -7  11   2   13.60    6.60
   6 -11  -2   61.99   11.40
  -6 -11   2   72.69   11.90
  -6 -11   2   70.29    6.30
   6 -11  -2   40.80    9.30
  -6 -11   2   74.89    5.70
  -6 -11   2   70.79    5.60
  -6  11   2   55.19    9.60
  -6  11   2   69.69   11.10
  -5 -11   2   26.20    4.10
   5 -11  -2   14.30    6.10
   5 -11  -2   23.70    7.10
  -5 -11   2   29.80    4.80
  -5 -11   2   28.60    7.80
  -5 -11   2   29.40    4.30
  -5  11   2   31.80    8.20
  -5  11   2   20.40    6.80
  -4 -11   2    4.40    2.90
  -4 -11   2    5.20    2.80
  -4 -11   2    4.80    2.70
   4 -11  -2    3.40    5.10
   4 -11  -2   -2.60    4.00
  -4  11   2    5.30    4.70
  -4  11   2    7.40    4.60
   3 -11  -2    4.00    4.70
  -3 -11   2   -1.70    1.90
  -3 -11   2    2.50    2.70
   3 -11  -2    3.50    4.60
  -3 -11   2    1.10    2.80
   3  11  -2   -0.40    2.40
  -3  11   2    5.80    4.20
   3  11  -2    0.60    2.40
  -3  11   2   -4.10    3.40
  -2 -11   2    6.40    3.60
   2 -11  -2    0.90    3.90
  -2 -11   2    3.30    2.20
  -2 -11   2    3.30    2.60
  -2 -11   2    4.70    3.10
   2 -11  -2    0.40    4.00
   2 -11  -2   -2.30    2.90
   2  11  -2    6.20    3.40
   2  11  -2   10.80    3.20
  -2  11   2    0.50    3.90
  -2  11   2    5.80    4.40
  -1 -11   2   -1.20    2.40
   1 -11  -2   -0.50    3.20
   1 -11  -2    4.40    3.80
  -1 -11   2    1.20    2.20
   1 -11  -2   -4.40    3.00
  -1 -11   2    1.50    2.30
   1  11  -2   -0.40    2.30
   1  11  -2    1.30    2.80
  -1  11   2   -1.70    3.40
   1  11  -2    0.40    2.80
  -1  11   2    0.10    3.40
   0 -11  -2    8.30    4.30
   0 -11  -2    3.80    3.10
   0 -11   2    1.20    2.90
   0 -11   2    0.80    2.30
   0 -11  -2    2.50    2.30
   0 -11  -2   -0.40    3.00
   0 -11   2    0.20    3.00
   0 -11  -2    0.10    3.30
   0  11  -2    2.30    3.60
   0  11   2    2.00    3.50
   0  11   2    4.60    3.60
   0  11  -2    2.50    2.90
   0  11  -2   -1.20    3.00
   1 -11   2  102.09   10.10
   1 -11   2  131.19   12.10
  -1 -11  -2  142.09   11.30
  -1 -11  -2  149.88   10.70
   1 -11   2  135.79   10.60
  -1 -11  -2  132.69    8.70
  -1 -11  -2  136.29   10.20
  -1 -11  -2  158.18   10.80
   1  11   2  136.29   10.50
   1  11   2  145.09   10.90
  -1  11  -2  159.88   11.50
  -1  11  -2  130.49    9.60
  -1  11  -2  148.49   11.40
  -2 -11  -2   94.79    9.50
   2 -11   2   84.69   10.30
  -2 -11  -2  105.79    9.50
   2 -11   2  114.39   11.40
  -2 -11  -2   95.49    9.20
  -2 -11  -2   75.09    8.70
  -2 -11  -2  101.39   10.90
  -2  11  -2   91.89   10.60
  -2  11  -2  123.69   11.10
  -2  11  -2   90.39   10.30
   2  11   2   87.39    9.30
   2  11   2   87.59    9.40
  -3 -11  -2   86.79    7.60
  -3 -11  -2   70.29    8.70
  -3 -11  -2   61.59    7.70
  -3 -11  -2   61.39    7.40
  -3 -11  -2   87.29    8.90
   3 -11   2   57.69    9.50
  -3  11  -2   70.89    9.70
   3  11   2   80.49    8.90
  -3  11  -2   93.09   10.20
  -3  11  -2   69.49    9.90
  -4 -11  -2  100.29   10.40
  -4 -11  -2  112.99   11.00
   4 -11   2  107.79   13.10
  -4 -11  -2  113.69    8.90
  -4 -11  -2   90.19    9.00
   4  11   2  118.69   10.60
  -4  11  -2   97.29   11.80
  -4  11  -2  108.29   11.70
  -4  11  -2  109.39   12.50
  -5 -11  -2   72.49    7.90
  -5 -11  -2   64.79    8.90
  -5 -11  -2   46.70    7.10
   5 -11   2   46.60   10.20
  -5 -11  -2   58.09    9.80
  -5 -11  -2   50.29    7.10
  -5  11  -2   85.09   11.60
  -5  11  -2   68.89   10.70
   5  11   2   54.79    7.40
  -5  11  -2   52.99    9.30
  -5  11  -2   56.09    7.90
  -6 -11  -2   56.19    7.60
  -6 -11  -2   51.09    6.90
  -6 -11  -2   48.20    6.90
   6 -11   2   67.29   11.80
  -6 -11  -2   58.89    9.90
  -6  11  -2   61.39    9.80
  -6  11  -2   71.39   11.30
  -6  11  -2   73.99    9.70
  -7 -11  -2   38.20    6.40
  -7 -11  -2   34.70    6.00
   7 -11   2   38.60   10.10
  -7 -11  -2   21.80    7.60
  -7 -11  -2   39.50    6.40
  -7  11  -2   40.90    8.40
  -7  11  -2   51.09    9.80
  -7  11  -2   34.90    8.80
  -8 -11  -2    3.90    3.40
  -8 -11  -2    0.40    5.10
  -8 -11  -2    0.20    3.60
   8 -11   2    2.10    6.10
  -8 -11  -2    2.40    3.00
  -8  11  -2   -2.00    4.80
  -8  11  -2    8.60    5.70
  -8  11  -2    3.00    6.10
  -9 -11  -2    1.20    3.70
   9 -11   2    1.50    7.10
  -9 -11  -2    7.20    6.40
  -9 -11  -2    1.80    3.40
  -9 -11  -2    2.80    3.40
  -9  11  -2   -1.20    5.50
  -9  11  -2    6.10    6.40
  -9  11  -2   -5.40    5.10
  10 -11   2    0.80    7.50
 -10 -11  -2   -0.50    3.60
 -10 -11  -2    2.50    4.00
 -10  11  -2    2.20    6.10
 -10  11  -2   -3.60    5.30
 -10  11  -2    6.90    7.70
 -11 -11  -2    0.30    3.80
  11 -11   2   -9.70    6.50
 -11 -11  -2    8.60    4.70
 -11  11  -2    3.50    7.40
 -11  11  -2    9.30    7.90
 -11  11  -2   -7.90    7.30
 -11 -12   2   33.40    5.30
  11 -12  -2   26.50    9.10
 -11 -12   2   29.50    5.00
 -11  12   2   16.30    9.80
 -11  12   2   33.90   10.10
 -10 -12   2   30.30    4.80
  10 -12  -2   47.20   11.70
 -10 -12   2   33.90   10.80
 -10 -12   2   24.90    4.40
 -10  12   2   29.50   10.60
 -10  12   2   32.30    9.50
  -9 -12   2   42.00   11.10
   9 -12  -2   26.50    9.50
  -9 -12   2   34.40    4.90
  -9 -12   2   28.60    4.80
  -9  12   2   41.10   11.70
  -9  12   2   23.70    8.20
   8 -12  -2    4.00    5.60
  -8 -12   2    4.10    2.80
  -8 -12   2   -2.40    5.70
  -8 -12   2    1.30    2.30
   8 -12  -2    2.90    6.30
  -8  12   2    1.00    6.50
  -8  12   2   -4.60    5.40
   7 -12  -2  344.37   24.50
  -7 -12   2  389.26   16.90
  -7 -12   2  397.86   25.10
  -7 -12   2  396.66   16.70
   7 -12  -2  367.86   24.90
  -7  12   2  368.66   23.50
  -7  12   2  414.06   25.80
  -6 -12   2  229.88   11.60
  -6 -12   2  234.78   18.70
   6 -12  -2  240.88   18.70
   6 -12  -2  216.28   20.70
  -6 -12   2  215.48   11.80
  -6 -12   2  230.78   12.10
  -6  12   2  250.27   18.40
  -6  12   2  260.07   18.40
  -5 -12   2    6.00    3.10
  -5 -12   2    6.20    3.00
   5 -12  -2    2.00    5.50
  -5 -12   2    3.90    3.10
   5 -12  -2    3.30    5.70
  -5  12   2    9.80    5.70
  -5  12   2    1.00    4.80
  -4 -12   2    8.90    3.60
   4 -12  -2    5.10    5.10
   4 -12  -2   -1.10    4.60
  -4 -12   2    2.00    2.90
  -4 -12   2    6.20    3.20
  -4  12   2    5.30    4.60
  -4  12   2    9.00    5.40
  -3 -12   2  149.19    9.90
  -3 -12   2  135.89    9.70
   3 -12  -2  115.19   13.40
   3 -12  -2  125.39   13.90
  -3 -12   2  136.69   10.60
  -3  12   2  124.19   13.20
  -3  12   2  148.79   14.60
   3  12  -2  135.39    9.90
  -2 -12   2  113.49   10.00
  -2 -12   2  113.39   11.20
   2 -12  -2  121.79   13.20
  -2 -12   2  105.49   10.10
  -2 -12   2  116.79    7.50
   2 -12  -2  111.29   12.70
   2  12  -2  125.39   11.20
  -2  12   2  108.69   12.20
  -2  12   2  110.69   12.20
  -1 -12   2    2.00    2.80
   1 -12  -2    0.00    4.00
   1 -12  -2    0.10    4.20
  -1 -12   2   -0.50    2.80
  -1 -12   2    1.10    2.70
   1 -12  -2    5.50    4.60
  -1  12   2   -4.40    3.20
   1  12  -2    1.10    3.10
   1  12  -2    0.50    2.50
  -1  12   2    2.80    3.80
   0 -12   2  152.38   11.60
   0 -12   2  175.98   12.20
   0 -12  -2  180.08   12.70
   0 -12   2  182.28   12.00
   0 -12  -2  164.38    9.80
   0 -12  -2  177.38   12.70
   0 -12  -2  143.09   13.90
   0  12  -2  172.48   12.30
   0  12   2  152.38   12.10
   0  12   2  190.48   13.20
   0  12  -2  187.18   10.90
   0  12  -2  176.88   12.30
  -1 -12  -2  504.95   23.00
   1 -12   2  494.35   23.50
  -1 -12  -2  475.75   20.00
   1 -12   2  492.35   23.80
  -1 -12  -2  504.35   23.30
  -1 -12  -2  473.45   22.40
  -1 -12  -2  451.65   23.80
  -1  12  -2  461.95   23.50
   1  12   2  456.75   22.70
   1  12   2  464.05   23.00
  -1  12  -2  463.15   23.30
  -1  12  -2  483.75   21.40
   2 -12   2   47.00    8.50
  -2 -12  -2   60.09    8.80
  -2 -12  -2   55.89    7.50
  -2 -12  -2   63.09    7.30
  -2 -12  -2   56.29    7.50
  -2 -12  -2   49.80    6.80
   2 -12   2   40.00    8.10
  -2  12  -2   66.59    9.60
  -2  12  -2   68.89    8.70
  -2  12  -2   63.99    9.30
   2  12   2   70.09    8.60
  -3 -12  -2   58.89    7.40
  -3 -12  -2   45.50    5.80
  -3 -12  -2   47.10    6.90
  -3 -12  -2   57.79    7.60
  -3 -12  -2   59.59    8.60
   3 -12   2   53.79    9.30
  -3  12  -2   47.60    8.50
  -3  12  -2   43.40    8.50
   3  12   2   58.79    8.00
  -3  12  -2   64.19    9.10
  -4 -12  -2  228.28   13.20
  -4 -12  -2  195.48   12.80
   4 -12   2  147.99   15.70
  -4 -12  -2  201.38   13.70
  -4 -12  -2  207.08   12.90
   4  12   2  201.88   12.90
  -4  12  -2  190.88   15.10
  -4  12  -2  189.48   15.00
  -4  12  -2  215.78   14.80
  -5 -12  -2  273.97   15.90
  -5 -12  -2  270.37   15.90
  -5 -12  -2  286.37   18.30
  -5 -12  -2  271.17   15.30
  -5 -12  -2  282.17   15.30
   5 -12   2  257.67   19.40
  -5  12  -2  270.87   15.60
  -5  12  -2  251.27   18.20
  -5  12  -2  247.38   17.50
  -5  12  -2  264.97   18.90
  -6 -12  -2    4.20    3.20
  -6 -12  -2    3.00    3.30
  -6 -12  -2   -1.70    3.20
  -6 -12  -2    6.90    5.80
   6 -12   2    4.10    6.40
  -6  12  -2    5.90    4.70
  -6  12  -2    4.90    5.00
  -6  12  -2   -3.20    4.80
  -7 -12  -2  193.18   12.50
  -7 -12  -2  181.68   12.40
   7 -12   2  196.88   21.00
  -7 -12  -2  177.88   18.10
  -7 -12  -2  174.68   12.30
  -7  12  -2  191.28   20.20
  -7  12  -2  187.88   16.30
  -7  12  -2  166.38   17.90
   8 -12   2   42.30   11.00
  -8 -12  -2   51.59    7.30
  -8 -12  -2   50.79   10.70
  -8 -12  -2   42.00    6.90
  -8 -12  -2   48.70    7.50
  -8  12  -2   44.80   10.10
  -8  12  -2   33.20    8.40
  -8  12  -2   42.50   11.50
  -9 -12  -2   17.10    5.30
   9 -12   2   -0.80    7.20
  -9 -12  -2   12.90    7.80
  -9 -12  -2   19.70    5.50
  -9  12  -2   19.30    8.90
  -9  12  -2   23.50    8.80
 -10 -12  -2   -2.30    3.70
  10 -12   2  -12.70    6.20
 -10 -12  -2   -1.30    3.60
 -10  12  -2   -1.60    7.00
 -10  12  -2   -6.30    6.30
 -11 -12  -2  191.18   14.00
  11 -12   2  144.99   22.00
 -11  12  -2  187.18   20.80
 -11  12  -2  166.98   21.40
 -10 -13   2   -2.00    2.80
 -10 -13   2   -4.20    5.80
  10 -13  -2   17.00    9.80
 -10 -13   2   -2.20    3.00
 -10  13   2   -9.80    6.70
 -10  13   2   -2.40    6.40
   9 -13  -2   -5.10    6.70
  -9 -13   2    1.20    3.00
  -9 -13   2   -1.10    2.70
  -9 -13   2   -0.30    7.00
  -9  13   2   -1.90    6.90
  -9  13   2   -1.20    6.10
  -8 -13   2    0.80    2.80
  -8 -13   2    4.10    6.50
   8 -13  -2    0.60    5.60
   8 -13  -2  -11.40    5.00
  -8 -13   2    4.90    3.20
  -8  13   2   -2.70    6.40
  -8  13   2    5.30    6.50
   7 -13  -2   -5.20    4.60
   7 -13  -2    5.90    6.70
  -7 -13   2    3.10    2.90
  -7 -13   2    0.70    5.90
  -7 -13   2    2.90    3.10
  -7  13   2    4.50    6.10
  -7  13   2    3.20    6.20
  -6 -13   2    7.00    6.30
   6 -13  -2    1.00    5.70
  -6 -13   2    2.20    2.80
  -6 -13   2    3.40    2.90
   6 -13  -2   12.00    6.90
  -6 -13   2    4.90    2.90
  -6  13   2    5.70    5.50
  -6  13   2    3.20    5.50
   5 -13  -2   19.00    7.30
   5 -13  -2   12.70    7.00
  -5 -13   2   20.10    4.70
  -5 -13   2   30.50    5.50
  -5 -13   2   21.00    4.70
  -5  13   2   33.10    9.30
  -5  13   2   29.10    7.90
  -4 -13   2    5.00    3.60
   4 -13  -2   -5.70    4.00
   4 -13  -2   11.70    6.10
  -4 -13   2   11.80    3.90
  -4 -13   2   15.10    4.50
  -4  13   2   10.20    5.00
  -4  13   2    2.20    4.90
  -3 -13   2   -4.00    3.40
  -3 -13   2    1.10    3.20
  -3 -13   2    4.20    3.60
   3 -13  -2   -1.10    3.70
   3 -13  -2   -6.40    4.30
  -3  13   2    9.60    5.40
   3  13  -2    2.00    3.50
  -3  13   2    1.40    3.90
  -2 -13   2   22.20    4.00
  -2 -13   2   26.40    5.50
   2 -13  -2   21.30    6.80
   2 -13  -2   37.30    8.20
  -2 -13   2   22.60    5.10
  -2 -13   2   19.40    5.90
  -2  13   2   31.50    7.60
  -2  13   2   25.80    7.30
   2  13  -2   36.60    6.70
   1 -13  -2  141.29   14.50
  -1 -13   2  133.99   12.20
  -1 -13   2  109.49   10.00
  -1 -13   2  105.09   10.90
   1 -13  -2   99.29   11.60
   1  13  -2  113.89   11.60
  -1  13   2  117.99   12.80
  -1  13   2  103.89   12.10
   0 -13   2    7.00    4.40
   0 -13  -2    6.70    5.10
   0 -13   2    8.90    4.30
   0 -13  -2    7.80    4.80
   0 -13  -2    1.50    3.80
   0 -13  -2    3.80    3.00
   0  13   2    6.50    4.60
   0  13   2    8.90    4.30
   0  13  -2   -0.70    3.10
   0  13  -2   11.20    4.00
  -1 -13  -2   -0.90    3.00
   1 -13   2   10.10    4.70
  -1 -13  -2    4.80    5.00
  -1 -13  -2    8.10    3.20
  -1 -13  -2   13.20    4.80
   1 -13   2    9.30    4.60
  -1  13  -2    8.30    4.70
  -1  13  -2   11.40    4.40
  -1  13  -2   13.50    5.40
   1  13   2    5.20    4.50
  -2 -13  -2    0.90    3.30
  -2 -13  -2   11.30    4.70
   2 -13   2   -2.50    4.50
  -2 -13  -2    0.70    4.20
  -2 -13  -2    5.70    3.80
  -2 -13  -2    7.60    3.80
  -2  13  -2    1.40    3.90
  -2  13  -2   13.00    5.20
   2  13   2    7.80    4.40
  -2  13  -2    6.70    4.50
   3 -13   2    4.10    5.00
  -3 -13  -2    2.80    3.80
  -3 -13  -2    0.70    2.50
  -3 -13  -2    0.70    2.70
  -3 -13  -2   -0.30    3.00
  -3 -13  -2    0.80    3.30
   3  13   2    5.10    3.70
  -3  13  -2    4.10    4.70
  -3  13  -2    6.50    4.80
  -3  13  -2    2.70    4.40
  -4 -13  -2    8.30    4.00
   4 -13   2    8.60    5.90
  -4 -13  -2    2.40    3.70
  -4 -13  -2    4.80    4.50
  -4 -13  -2   11.10    4.50
   4  13   2    8.90    4.80
  -4  13  -2   -2.40    4.70
  -4  13  -2    0.70    4.00
  -4  13  -2    9.00    5.60
  -5 -13  -2    6.60    4.00
   5 -13   2    1.30    5.50
  -5 -13  -2    8.30    4.00
  -5 -13  -2    4.80    4.10
  -5 -13  -2    5.10    3.60
  -5  13  -2    4.10    4.80
  -5  13  -2   -1.40    4.60
  -6 -13  -2   23.40    5.90
   6 -13   2   28.00    9.80
  -6 -13  -2   26.20    5.90
  -6 -13  -2   33.30    9.10
  -6 -13  -2   31.30    6.30
  -6  13  -2   34.50    8.60
  -6  13  -2   21.90    7.50
  -7 -13  -2   19.60    5.50
  -7 -13  -2    3.20    5.50
  -7 -13  -2   18.90    5.20
   7 -13   2   14.90    8.80
  -7 -13  -2   11.00    4.70
  -7  13  -2   21.50    8.10
  -7  13  -2   14.20    7.50
  -8 -13  -2   39.90   10.10
  -8 -13  -2   33.00    6.70
  -8 -13  -2   35.90    7.10
  -8 -13  -2   27.80    6.10
   8 -13   2   42.90   11.30
  -8  13  -2   16.90    9.10
  -8  13  -2   29.20    9.20
   9 -13   2   -6.10    6.50
  -9 -13  -2   -4.80    3.10
  -9 -13  -2   -1.50    3.70
  -9 -13  -2    4.30    6.80
  -9  13  -2    0.20    7.10
  -9  13  -2   -4.30    6.20
  10 -13   2   81.49   16.20
 -10 -13  -2   52.79    8.30
 -10  13  -2   74.59   14.00
 -10  13  -2   47.60   12.50
 -10 -14   2   17.00    4.80
  10 -14  -2   18.40   10.00
 -10 -14   2   16.40    4.50
 -10 -14   2   39.60   12.70
 -10  14   2   25.00   11.40
 -10  14   2   26.70    9.90
  -9 -14   2   -3.80    3.00
   9 -14  -2    4.80    6.90
  -9 -14   2    5.10    3.70
  -9 -14   2   -0.40    6.90
  -9  14   2    2.50    7.10
  -9  14   2   11.00    8.70
   8 -14  -2   -2.10    5.60
   8 -14  -2   -2.40    6.40
  -8 -14   2    1.60    3.10
  -8 -14   2   -0.80    2.90
  -8 -14   2   -2.20    6.90
  -8  14   2    4.60    7.60
  -8  14   2    5.00    7.60
  -7 -14   2   26.80    5.20
   7 -14  -2   20.20    9.20
  -7 -14   2   14.20    8.40
   7 -14  -2   18.10    8.40
  -7 -14   2    9.50    4.00
  -7  14   2   20.20    8.70
  -7  14   2   21.10    9.60
   6 -14  -2   -4.60    4.90
  -6 -14   2   -1.10    5.50
   6 -14  -2   14.10    8.30
  -6 -14   2   -0.60    2.70
  -6 -14   2   -0.20    3.10
  -6 -14   2   -0.30    2.90
  -6  14   2   -0.10    5.90
  -6  14   2   10.40    6.40
  -5 -14   2   62.89    8.10
   5 -14  -2   54.19   12.00
  -5 -14   2   49.50    7.20
  -5 -14   2   55.89    7.60
   5 -14  -2   39.20    9.70
  -5  14   2   61.69   10.70
  -5  14   2   50.79   11.10
  -4 -14   2   78.49    9.00
   4 -14  -2   69.79   11.90
  -4 -14   2   66.39    8.60
  -4 -14   2   71.19    9.00
   4 -14  -2   83.49   13.20
  -4  14   2   73.69   12.00
  -4  14   2   67.79   11.20
   3 -14  -2    9.90    6.60
   3 -14  -2   25.80    7.40
  -3 -14   2   20.40    5.10
  -3 -14   2   22.90    5.90
  -3 -14   2   28.90    6.60
  -3  14   2   23.40    7.10
   3  14  -2   27.50    6.20
  -3  14   2   22.10    7.30
   2 -14  -2   19.10    7.00
   2 -14  -2   24.80    7.20
  -2 -14   2   20.00    5.80
  -2 -14   2   29.30    6.70
  -2 -14   2   26.20    6.10
  -2  14   2   29.30    7.50
   2  14  -2   35.10    6.90
  -2  14   2   21.90    7.10
  -1 -14   2    8.50    4.20
  -1 -14   2    3.10    4.30
  -1 -14   2    9.10    5.50
   1 -14  -2    8.60    5.60
   1 -14  -2   13.70    6.10
  -1  14   2    3.80    4.70
   1  14  -2    3.60    4.50
  -1  14   2   13.90    5.80
   0 -14  -2    2.70    3.90
   0 -14  -2    3.40    5.10
   0 -14  -2    3.60    3.90
   0 -14   2    1.60    4.30
   0 -14   2    3.10    3.80
   0  14   2    1.30    4.20
   0  14  -2    2.50    4.40
   1 -14   2   13.90    5.50
  -1 -14  -2    3.90    3.90
  -1 -14  -2    1.20    3.90
  -1 -14  -2    5.10    5.00
  -1  14  -2    5.00    4.00
  -1  14  -2    8.50    5.10
   1  14   2    6.20    5.10
  -2 -14  -2   24.10    6.00
  -2 -14  -2    9.80    3.50
  -2 -14  -2   14.90    4.80
   2 -14   2   13.60    6.20
  -2 -14  -2   15.60    6.30
   2  14   2    8.20    5.10
  -2  14  -2    5.70    5.60
  -2  14  -2   13.60    5.80
  -2  14  -2   14.80    5.90
  -3 -14  -2   10.80    5.40
   3 -14   2    6.20    5.40
  -3 -14  -2    8.20    4.60
  -3 -14  -2    2.10    3.10
  -3  14  -2   11.90    5.40
   3  14   2   16.50    5.50
  -3  14  -2    9.00    4.90
  -3  14  -2   10.50    5.90
   4 -14   2   23.10    7.90
  -4 -14  -2   18.30    6.00
  -4 -14  -2   17.50    5.10
  -4 -14  -2   15.60    5.50
  -4  14  -2   20.00    6.80
  -4  14  -2   12.50    5.90
  -4  14  -2   11.00    5.50
   4  14   2   22.40    6.20
  -5 -14  -2   42.60    7.50
  -5 -14  -2   49.30    7.90
  -5 -14  -2   46.20    7.70
  -5 -14  -2   40.50    7.40
   5 -14   2   36.30    9.90
  -5  14  -2   59.69   11.20
  -5  14  -2   32.20    8.10
  -6 -14  -2   41.10   10.40
  -6 -14  -2   16.90    5.50
   6 -14   2   19.40    8.70
  -6 -14  -2   30.70    6.60
  -6 -14  -2   28.60    6.70
  -6  14  -2   28.90    9.10
  -6  14  -2   38.30    9.90
  -7 -14  -2   10.00    7.10
  -7 -14  -2   18.40    5.80
   7 -14   2   11.00    8.10
  -7 -14  -2   13.10    5.30
  -7 -14  -2   11.50    5.10
  -7  14  -2   -1.60    5.90
  -7  14  -2    2.70    6.30
  -8 -14  -2   28.40    9.70
  -8 -14  -2   27.50    6.30
   8 -14   2   34.60   11.20
  -8 -14  -2   38.50    7.00
  -8 -14  -2   25.60    6.00
  -8  14  -2   47.60   11.50
  -8  14  -2   36.30   10.60
  -9 -14  -2   15.70    5.70
   9 -14   2   11.10    9.40
  -9 -14  -2    1.50    4.30
  -9  14  -2   17.30    9.40
  -9  14  -2   10.50    7.50
 -10 -14  -2   12.80    5.80
  10 -14   2    7.70   10.30
 -10  14  -2    9.90    8.90
 -10  14  -2   13.60    9.30
  -9 -15   2   87.99    9.40
  -9 -15   2  111.69   10.70
   9 -15  -2   87.09   16.50
  -9 -15   2  100.39   17.20
  -9  15   2   91.49   15.80
  -9  15   2   90.19   16.10
  -8 -15   2   57.39    7.80
   8 -15  -2   59.69   14.20
  -8 -15   2   55.79    7.40
  -8 -15   2   42.20   11.90
   8 -15  -2   44.60   12.80
  -8  15   2   53.39   12.50
  -8  15   2   64.69   13.10
  -7 -15   2    2.30    3.40
  -7 -15   2    0.80    3.60
   7 -15  -2   -8.40    6.50
  -7 -15   2   -2.50    6.40
   7 -15  -2   -6.50    6.20
  -7  15   2   -0.60    6.20
  -7  15   2   -1.90    6.10
  -6 -15   2    2.60    3.70
   6 -15  -2   -2.20    7.10
  -6 -15   2   -1.60    2.90
  -6 -15   2    3.50    5.70
  -6 -15   2   -0.40    3.10
   6 -15  -2   -2.10    6.50
  -6  15   2   -0.30    6.10
  -6  15   2    3.50    6.00
   5 -15  -2  167.98   19.50
  -5 -15   2  187.68   12.90
   5 -15  -2  140.99   17.30
  -5 -15   2  171.88   12.50
  -5 -15   2  167.38   12.40
  -5  15   2  171.18   18.80
  -5  15   2  199.98   20.30
  -4 -15   2  133.09   12.50
   4 -15  -2  101.39   14.80
  -4 -15   2  140.99   13.10
  -4 -15   2  108.69   11.60
   4 -15  -2  107.39   15.00
  -4  15   2   98.49   13.30
  -4  15   2  100.69   14.00
   3 -15  -2   10.50    6.40
  -3 -15   2    3.00    4.30
  -3 -15   2    7.70    4.40
   3 -15  -2   -1.90    5.60
  -3 -15   2    3.70    3.80
  -3  15   2   -2.00    4.90
  -3  15   2    4.70    4.80
   2 -15  -2   88.29   13.20
  -2 -15   2   82.09   10.30
   2 -15  -2  112.99   13.50
  -2 -15   2   95.79   12.10
  -2  15   2   76.59   11.40
   2  15  -2  100.59   11.40
  -2  15   2   71.49   11.00
   1 -15  -2   92.19   13.80
   1 -15  -2  102.09   12.70
  -1 -15   2   92.79   11.30
  -1 -15   2   97.39   10.10
  -1 -15   2  113.69   13.50
   1  15  -2  107.19   11.70
  -1  15   2   88.29   12.80
   0 -15  -2   26.50    6.70
   0 -15   2   17.20    6.60
   0 -15   2   20.00    5.80
   0 -15   2   24.10    7.50
   0 -15  -2    6.20    5.50
   0  15  -2   27.50    6.90
   0  15   2   20.20    6.70
  -1 -15  -2   53.89    8.40
   1 -15   2   48.00    8.90
  -1 -15  -2   52.89    8.70
  -1 -15  -2   53.49    9.90
   1  15   2   44.30    8.80
  -1  15  -2   69.29   10.80
  -2 -15  -2  300.07   16.20
  -2 -15  -2  305.97   19.60
   2 -15   2  284.17   19.20
  -2 -15  -2  286.07   18.30
  -2  15  -2  269.57   16.70
  -2  15  -2  225.18   17.90
   2  15   2  277.17   17.60
  -3 -15  -2  105.89   11.80
   3 -15   2  121.69   14.80
  -3 -15  -2  108.79   12.90
   3  15   2  129.69   13.60
  -3  15  -2  125.39   14.90
  -3  15  -2  145.29   14.50
  -3  15  -2  113.19   13.80
   4 -15   2   -6.30    4.30
  -4 -15  -2    4.40    4.70
  -4 -15  -2    4.20    4.50
  -4  15  -2   -0.70    4.80
  -4  15  -2    0.00    5.40
  -5 -15  -2   11.80    5.90
   5 -15   2   23.90    8.60
  -5 -15  -2    8.60    4.60
  -5  15  -2   11.20    6.70
  -5  15  -2   19.80    7.80
  -6 -15  -2   51.49   10.80
  -6 -15  -2   38.80    7.70
   6 -15   2   25.80    9.50
  -6 -15  -2   34.30    7.50
  -6  15  -2   14.10    7.30
  -6  15  -2   26.40    9.20
  -7 -15  -2   -0.60    5.60
  -7 -15  -2   -0.80    4.10
   7 -15   2   -7.50    6.40
  -7 -15  -2   -5.00    4.00
  -7  15  -2    0.40    6.10
  -7  15  -2    6.10    7.10
   8 -15   2    2.80    7.30
  -8 -15  -2    4.60    7.40
  -8 -15  -2    0.80    4.20
  -8  15  -2    7.30    7.60
  -8  15  -2    5.90    7.70
   9 -15   2   68.29   15.70
  -9 -15  -2   58.39    9.00
  -9  15  -2   66.59   13.70
  -9  15  -2   82.09   15.10
  -9 -16   2   53.09   14.50
  -9 -16   2   43.90    7.20
   9 -16  -2   19.90   11.10
  -9 -16   2   36.20    7.10
  -9  16   2   35.10   12.10
  -9  16   2   51.09   12.90
   8 -16  -2   14.70   10.90
  -8 -16   2   15.70    5.30
  -8 -16   2   29.80   10.00
  -8 -16   2   17.60    5.50
   8 -16  -2    6.00    9.60
  -8  16   2   26.70    9.50
  -8  16   2   20.20    9.00
  -7 -16   2    2.50    7.20
  -7 -16   2   16.00    5.30
   7 -16  -2    8.80   10.00
   7 -16  -2    2.40    8.00
  -7 -16   2   12.10    4.80
  -7  16   2    7.30    7.60
  -7  16   2    8.60    7.90
  -6 -16   2   38.20    7.00
  -6 -16   2   30.40    6.80
   6 -16  -2   39.40   11.20
  -6 -16   2   31.40    6.70
   6 -16  -2   22.50    9.00
  -6 -16   2   26.90    9.90
  -6  16   2   47.40   11.40
  -6  16   2   28.00    9.90
  -5 -16   2    3.50    3.70
   5 -16  -2   -1.40    6.20
   5 -16  -2    0.90    7.50
  -5 -16   2    0.70    4.00
  -5 -16   2    9.30    5.00
  -5  16   2   -1.50    4.90
  -5  16   2    4.90    6.40
  -4 -16   2    1.40    4.40
  -4 -16   2    7.40    4.70
   4 -16  -2   17.30    8.80
   4 -16  -2    4.90    7.70
  -4  16   2   13.30    7.50
  -4  16   2    2.90    6.30
   3 -16  -2   34.70   10.00
  -3 -16   2   50.79    8.60
  -3 -16   2   33.30    7.70
   3 -16  -2   42.30   10.30
  -3  16   2   28.20    9.00
  -3  16   2   21.50    7.40
  -2 -16   2   13.50    6.50
   2 -16  -2   12.90    7.60
  -2 -16   2   11.30    5.60
   2 -16  -2   19.60    7.60
  -2  16   2   10.00    6.50
   2  16  -2    4.90    4.70
  -1 -16   2   91.49   11.80
   1 -16  -2   92.29   12.50
   1 -16  -2   86.99   13.70
  -1 -16   2   92.59   12.90
   1  16  -2  109.69   13.00
  -1  16   2  107.69   14.40
   0 -16  -2   28.80    8.20
   0 -16   2   32.30    8.60
   0 -16   2   22.70    6.30
   0 -16  -2   26.80    7.10
   0  16  -2   36.30    8.10
   0  16   2   28.90    7.60
  -1 -16  -2   -4.80    3.50
   1 -16   2    7.30    5.60
   1 -16   2    3.70    4.50
  -1 -16  -2   -0.20    5.10
  -1  16  -2    8.20    5.40
   1  16   2   -2.90    4.30
  -2 -16  -2    8.20    6.10
   2 -16   2   16.40    6.80
  -2 -16  -2   15.30    6.00
  -2  16  -2   23.10    7.40
   2  16   2   20.10    6.90
  -3 -16  -2   -0.20    4.90
  -3 -16  -2  -10.20    3.50
   3 -16   2   -4.70    6.10
  -3  16  -2   -5.30    4.70
   3  16   2    7.20    5.40
  -3  16  -2    2.90    5.80
  -4 -16  -2   21.70    7.30
   4 -16   2    8.90    7.00
  -4 -16  -2    6.90    5.10
  -4  16  -2   16.40    7.40
  -4  16  -2   14.60    7.20
  -5 -16  -2    3.80    4.90
  -5 -16  -2   -3.70    4.80
   5 -16   2    2.50    6.50
  -5  16  -2   -5.20    5.60
  -5  16  -2   -6.50    4.90
  -6 -16  -2    1.30    6.70
  -6 -16  -2    6.30    5.30
   6 -16   2    2.40    7.10
  -6 -16  -2    2.60    4.90
  -6  16  -2    7.70    6.60
  -6  16  -2   11.80    7.50
   7 -16   2    7.70    8.40
  -7 -16  -2   -4.60    5.90
  -7 -16  -2    4.60    5.10
  -7 -16  -2    8.20    5.40
  -7  16  -2   -0.10    6.20
  -7  16  -2    6.80    6.70
   8 -16   2    3.80    8.30
  -8 -16  -2    9.20    5.70
  -8  16  -2   14.70    9.00
  -8  16  -2   10.10    8.30
  -8 -17   2    6.60    4.40
  -8 -17   2    5.90    7.90
   8 -17  -2    4.70    8.80
  -8 -17   2    0.10    4.50
   8 -17  -2   15.10    9.90
  -8  17   2    9.50    8.60
  -8  17   2    7.80    8.40
   7 -17  -2   -5.30    7.40
  -7 -17   2    6.90    8.10
   7 -17  -2   -4.40    7.60
  -7 -17   2    0.40    4.20
  -7 -17   2    6.50    4.60
  -7  17   2   14.90    9.10
  -7  17   2    9.30    8.60
  -6 -17   2    3.90    4.30
   6 -17  -2   19.60    9.20
  -6 -17   2   10.60    7.70
   6 -17  -2   -4.20    8.00
  -6 -17   2    4.30    5.00
  -6  17   2    0.60    7.60
  -6  17   2    6.30    7.30
  -5 -17   2   44.10    8.30
   5 -17  -2   23.20   10.20
   5 -17  -2   27.00   11.20
  -5 -17   2   47.30    8.90
  -5  17   2   10.30    7.50
  -5  17   2   31.00   10.00
   4 -17  -2   51.09   11.10
  -4 -17   2   69.69   10.10
   4 -17  -2   80.69   13.90
  -4 -17   2   66.79   10.60
  -4  17   2   31.80    9.40
  -4  17   2   67.89   13.20
  -3 -17   2   24.30    6.70
  -3 -17   2   23.30    7.40
   3 -17  -2    4.70    7.80
   3 -17  -2   19.70    8.80
  -3  17   2   12.00    7.40
  -2 -17   2   19.90    7.50
   2 -17  -2   26.10    8.70
  -2 -17   2   13.70    6.70
   2 -17  -2   16.30    7.80
   2  17  -2   17.30    6.50
  -2  17   2   15.40    7.60
   1 -17  -2   22.90    7.70
   1 -17  -2   13.80    7.90
  -1 -17   2   36.30    9.10
  -1  17   2   40.80    9.90
   1  17  -2   16.30    6.70
   0 -17   2   18.10    6.50
   0 -17   2    8.50    6.40
   0 -17  -2    9.10    5.20
   0 -17  -2   14.60    7.50
   0  17   2   16.70    6.80
   0  17  -2   16.90    6.50
  -1 -17  -2   55.49    9.10
  -1 -17  -2   54.99   10.80
   1 -17   2   35.70    9.70
   1 -17   2   46.60    9.30
   1  17   2   36.90    8.70
  -1  17  -2   65.59   10.90
   2 -17   2   36.90   10.00
   2 -17   2   23.60    8.10
  -2 -17  -2   51.49   10.30
  -2  17  -2   38.80    8.90
   2  17   2   26.90    8.00
   3 -17   2    1.10    6.10
  -3 -17  -2    0.80    5.10
  -3 -17  -2   -7.70    4.70
  -3  17  -2    0.10    5.90
   3  17   2    0.10    5.00
  -4 -17  -2   -3.40    4.20
   4 -17   2    9.60    8.00
  -4 -17  -2    4.40    5.80
  -4  17  -2    1.90    5.80
   5 -17   2    7.00    8.50
  -5 -17  -2   15.30    7.70
  -5 -17  -2   23.30    7.00
  -5  17  -2   15.00    8.00
  -5  17  -2    8.90    7.50
  -6 -17  -2    0.50    4.60
   6 -17   2    6.10    7.30
  -6 -17  -2   -2.70    4.60
  -6 -17  -2    1.60    6.60
  -6  17  -2    3.40    7.00
  -6  17  -2   -0.10    6.40
  -7 -17  -2   19.40    6.80
  -7 -17  -2   10.10    8.00
   7 -17   2   28.80   10.90
  -7 -17  -2   12.70    6.80
  -7  17  -2    8.10    8.30
  -7  17  -2   -3.20    6.80
   8 -17   2    9.70    9.60
  -8 -17  -2    4.40    5.60
  -8  17  -2    4.30    7.80
  -8  17  -2    3.50    8.40
   7 -18  -2   30.40   10.90
  -7 -18   2   49.50    8.90
   7 -18  -2   40.40   13.60
  -7 -18   2   32.70   12.10
  -7  18   2   79.79   15.40
  -7  18   2   55.89   12.70
  -6 -18   2    8.70    5.90
  -6 -18   2   11.60    7.70
   6 -18  -2   42.90   13.40
   6 -18  -2   -4.70    8.60
  -6 -18   2   22.70    7.20
  -6  18   2   16.50    9.10
  -6  18   2   30.50   10.70
  -5 -18   2    0.40    4.90
  -5 -18   2    1.70    4.70
   5 -18  -2   12.20    9.60
   5 -18  -2   -7.20    7.60
  -5  18   2    5.30    6.60
  -5  18   2    8.40    7.70
  -4 -18   2   68.79   10.70
   4 -18  -2   51.29   11.80
  -4 -18   2   65.69   11.20
   4 -18  -2   87.09   15.30
  -4  18   2   60.39   12.40
  -3 -18   2  152.98   15.70
   3 -18  -2  137.79   18.90
  -3 -18   2  128.09   15.60
   3 -18  -2  123.99   16.70
  -3  18   2  121.19   16.50
   2 -18  -2   17.20    8.00
   2 -18  -2   10.90    7.90
  -2 -18   2   20.80    8.10
  -2 -18   2   10.20    6.60
  -2  18   2   22.40    8.90
   1 -18  -2   36.60   10.50
  -1 -18   2   44.80   10.50
   1 -18  -2   30.90    8.80
  -1  18   2   27.90    8.90
   1  18  -2   43.60    9.60
   0 -18  -2   37.40    8.80
   0 -18   2   66.09   12.40
   0 -18  -2   28.80   10.00
   0  18   2   72.59   12.70
   0  18  -2   48.10   10.20
  -1 -18  -2   55.49   11.60
   1 -18   2   76.39   14.10
   1 -18   2   84.79   11.70
  -1  18  -2   43.00   10.10
   1  18   2   62.99   11.40
  -2 -18  -2    1.10    5.90
   2 -18   2   -3.20    6.00
   2 -18   2   -1.40    5.30
  -2  18  -2   -4.80    5.40
   2  18   2    2.60    5.30
  -3 -18  -2    6.90    6.80
   3 -18   2   -1.60    7.40
   3 -18   2   -1.10    5.80
  -3  18  -2   -3.10    5.40
   4 -18   2   50.09   11.90
  -4 -18  -2   54.69   10.30
  -4 -18  -2   47.10   10.50
   4 -18   2   39.80   11.70
  -4  18  -2   26.00    9.30
   5 -18   2   18.10    9.60
  -5 -18  -2   27.40    8.50
  -5 -18  -2   15.00    7.50
   5 -18   2   14.40    8.10
  -5  18  -2   22.70    9.60
  -6 -18  -2   11.80    7.80
  -6 -18  -2    4.70    5.40
   6 -18   2   -1.00    8.30
  -6 -18  -2    2.20    6.30
   6 -18   2    1.10    7.80
  -6  18  -2    9.20    7.80
   7 -18   2   37.40   12.50
  -7 -18  -2   54.69   10.50
  -7 -18  -2   33.10    8.50
   7 -18   2   38.20   12.30
  -7  18  -2   10.30    8.10
  -7  18  -2   36.30   11.50
  -6 -19   2    7.60    8.30
   6 -19  -2   -3.90    8.50
  -6 -19   2    6.20    5.40
   6 -19  -2   -2.00    8.70
  -6  19   2    7.30    9.70
  -6  19   2   14.30    9.30
   5 -19  -2    3.30    8.10
  -5 -19   2   -4.10    5.40
   5 -19  -2    3.70    8.00
  -5 -19   2    7.70    6.00
  -5  19   2   10.00    8.30
   4 -19  -2   14.90   10.30
   4 -19  -2   -3.10    7.70
  -4 -19   2   -6.70    5.00
  -4 -19   2    3.00    5.90
  -4  19   2   -3.20    6.70
  -3 -19   2   13.20    7.30
  -3 -19   2   24.70    8.30
   3 -19  -2    5.80    8.80
   3 -19  -2   11.10    8.40
  -3  19   2    4.20    7.10
   2 -19  -2   13.80    7.40
   2 -19  -2    4.60    8.30
  -2 -19   2    8.20    7.00
  -2  19   2   12.30    7.70
  -1 -19   2   35.90   10.10
   1 -19  -2   25.60    9.60
   1 -19  -2   35.40    9.60
  -1  19   2   35.60   10.00
   1  19  -2   48.60   10.30
   0 -19   2   -1.80    7.00
   0 -19  -2   11.90    8.10
   0  19  -2   11.60    7.60
   0  19   2    6.10    6.50
  -1 -19  -2   11.70    8.40
   1 -19   2   13.90    8.10
   1 -19   2   -0.50    5.80
   1  19   2    8.20    6.80
  -1  19  -2    0.50    6.20
   2 -19   2   10.30    7.20
   2 -19   2  -11.40    6.30
  -2 -19  -2   12.00    7.60
  -2  19  -2    2.00    6.30
   2  19   2   16.90    7.00
   3 -19   2    5.40    7.10
   3 -19   2   -3.80    7.50
  -3 -19  -2    9.60    7.80
  -3  19  -2   -1.70    6.80
   4 -19   2   11.00    9.90
  -4 -19  -2   10.00    7.90
   4 -19   2   10.70    9.00
  -4  19  -2    6.20    8.20
  -5 -19  -2    5.10    6.50
  -5 -19  -2    4.30    6.80
   5 -19   2   13.00    9.40
   5 -19   2    4.90    9.50
  -5  19  -2    8.60    8.20
   6 -19   2   30.20   12.10
  -6 -19  -2   34.70    9.30
  -6 -19  -2   49.70   10.50
  -6 -19  -2   26.10   10.70
   6 -19   2  -11.80    8.10
  -6  19  -2   18.80    9.30
  -5 -20   2    3.40    6.80
  -5 -20   2    0.40    5.90
   5 -20  -2    1.30    8.90
   5 -20  -2  -17.70    8.20
  -5  20   2   -0.30    7.50
   4 -20  -2    5.30    9.30
   4 -20  -2    4.50    9.50
  -4 -20   2    5.20    6.40
  -4 -20   2    6.20    6.80
  -4  20   2    6.60    7.40
   3 -20  -2   16.00   10.50
  -3 -20   2   49.00   10.80
   3 -20  -2   20.80   10.10
  -3  20   2   30.20   10.80
   2 -20  -2    0.80    7.40
  -2 -20   2   20.30    9.20
   2 -20  -2   18.50   11.30
  -2  20   2   13.10    8.00
   1 -20  -2   22.20   10.30
  -1 -20   2   17.90    8.40
   1 -20  -2   23.80    8.20
   1  20  -2   22.00    8.50
  -1  20   2    9.50    7.70
   0 -20   2    6.80    7.10
   0 -20  -2    3.20    6.90
   0  20  -2   11.40    7.80
   0  20   2    3.70    6.90
  -1 -20  -2    1.00    7.00
   1 -20   2   -0.60    7.40
  -1  20  -2    1.60    5.90
   1  20   2    2.20    6.30
   2 -20   2   12.00    8.20
  -2 -20  -2   10.30    8.20
   2 -20   2    8.80    7.70
  -2  20  -2   -2.10    6.00
   3 -20   2   11.40    8.30
  -3 -20  -2   -0.20    6.80
   3 -20   2   15.70    9.90
  -3  20  -2   13.30    7.80
   4 -20   2  -10.20    7.60
   4 -20   2  -11.00    8.10
  -4 -20  -2    4.90    7.30
  -4  20  -2    4.50    7.00
   3 -21  -2    0.00    8.40
   3 -21  -2    9.40    8.80
  -3 -21   2    9.90    7.90
  -3  21   2    5.00    7.30
  -2 -21   2   82.59   14.60
   2 -21  -2   84.29   14.10
   2 -21  -2   64.09   14.90
  -2  21   2   66.09   13.10
   1 -21  -2  182.28   22.70
  -1 -21   2  169.68   21.00
  -1  21   2  159.68   20.40
   0 -21   2   44.80   12.50
   0 -21  -2   34.20   11.80
   0  21   2   21.50    9.10
   0  21  -2   23.30    9.40
  -1 -21  -2    8.00    7.90
   1 -21   2    1.90    8.00
   1  21   2    1.60    7.40
  -1  21  -2    0.10    6.80
  -2 -21  -2   44.60   12.80
   2 -21   2   34.70   12.50
  -2  21  -2   33.20   11.10
 -13   0   3   -4.30    4.60
 -13   0   3    1.90    5.60
 -12   0   3   -0.30    4.60
 -12   0   3   -2.30    4.20
 -11   0   3   -2.10    2.90
 -11   0   3   -1.50    3.60
 -11   0   3    1.90    3.90
 -10   0   3   -3.00    3.20
 -10   0   3   -3.60    2.60
 -10   0   3    0.70    3.20
  -9   0   3    0.60    3.00
  -9   0   3   -3.10    1.90
  -9   0   3    0.80    2.80
  -8   0   3    1.20    2.30
   8   0  -3   -1.60    2.70
  -8   0   3    0.00    2.50
  -8   0   3    1.00    2.30
   7   0  -3   -0.70    2.10
  -7   0   3   -1.20    2.00
  -7   0   3    3.60    2.70
  -7   0   3    1.40    2.20
   6   0  -3   -2.00    1.80
  -6   0   3   -0.50    1.70
  -6   0   3    1.90    2.20
   6   0  -3    0.10    1.90
  -6   0   3   -4.50    1.80
  -6   0   3   -0.60    1.50
  -5   0   3   -0.50    1.50
  -5   0   3   -1.70    1.30
  -5   0   3    1.20    2.00
   5   0  -3   -2.20    1.60
   5   0  -3   -0.10    1.90
  -4   0   3   -0.20    1.30
   4   0  -3   -3.80    1.60
  -4   0   3   -0.50    1.80
  -4   0   3   -0.20    1.40
  -4   0   3    0.00    1.00
  -4   0   3   -1.40    1.20
   4   0  -3    2.70    2.00
   3   0  -3   -0.10    1.80
  -3   0   3    0.40    1.70
  -3   0   3    0.10    1.20
   3   0  -3    1.00    1.80
  -3   0   3    0.60    1.70
  -3   0   3    1.20    1.30
  -3   0   3    1.10    1.70
  -3   0   3    0.70    1.20
   2   0  -3   -0.40    1.70
  -2   0   3   -0.40    1.30
  -2   0   3   -1.80    1.70
  -2   0   3    2.10    1.50
  -2   0   3    3.00    1.90
   2   0  -3   -3.00    1.50
  -2   0   3   -0.30    1.10
  -2   0   3   -1.00    1.80
  -1   0   3    0.10    1.40
  -1   0   3   -0.80    1.70
  -1   0   3   -0.60    1.20
  -1   0   3   -0.50    1.50
   1   0  -3    0.20    1.60
  -1   0   3    1.00    2.00
  -1   0   3   -0.40    1.70
   1   0  -3   -0.70    1.60
   0   0  -3    0.40    1.80
   0   0   3    0.90    1.60
   0   0  -3    0.50    1.80
   0   0   3   -1.00    1.60
   0   0  -3   -1.10    1.80
   0   0   3    1.80    1.80
   0   0   3   -1.60    1.50
  -1   0  -3   -0.60    2.10
   1   0   3   -1.00    2.10
   1   0   3    3.00    2.00
  -1   0  -3    3.00    2.10
  -1   0  -3   -1.80    1.90
   1   0   3   -1.70    1.90
   2   0   3   -3.90    1.50
  -2   0  -3    1.30    1.80
   2   0   3   -2.80    2.00
  -2   0  -3    0.90    2.40
  -2   0  -3   -3.50    1.90
  -2   0  -3   -0.80    2.30
   2   0   3   -0.70    2.30
  -3   0  -3   -1.10    2.30
  -3   0  -3    2.30    2.10
  -3   0  -3   -3.90    1.90
   3   0   3    3.20    2.60
  -3   0  -3    1.60    1.80
   3   0   3    2.60    2.50
   3   0   3   -1.80    1.70
  -3   0  -3    0.70    2.60
  -3   0  -3    0.10    2.10
  -4   0  -3   -0.90    2.40
   4   0   3   -0.70    2.40
  -4   0  -3   -2.70    1.70
  -4   0  -3    0.90    2.20
  -4   0  -3    1.20    1.80
   4   0   3    0.60    1.80
  -4   0  -3   -2.10    2.40
  -4   0  -3    0.60    2.90
  -4   0  -3   -2.30    2.60
   4   0   3    2.80    2.70
   5   0   3    4.30    2.90
  -5   0  -3   -2.30    2.00
  -5   0  -3    1.20    2.80
  -5   0  -3    0.60    3.10
   5   0   3    0.70    1.60
   5   0   3    1.40    2.80
  -5   0  -3    1.50    2.70
  -5   0  -3   -2.00    2.00
  -6   0  -3    0.90    2.80
   6   0   3    2.20    3.40
   6   0   3   -0.50    2.60
  -6   0  -3   -0.80    2.80
  -6   0  -3   -1.10    2.00
  -6   0  -3   -3.10    2.00
  -7   0  -3    1.50    2.70
  -7   0  -3   -7.10    3.00
   7   0   3    0.60    3.30
  -7   0  -3    0.80    2.20
  -7   0  -3    1.70    3.30
   7   0   3    0.90    3.30
  -8   0  -3    6.80    5.20
  -8   0  -3   -0.30    3.00
  -8   0  -3    0.90    2.30
  -8   0  -3   -3.80    2.90
   8   0   3    1.90    3.80
   9   0   3   -4.70    4.00
  -9   0  -3   -2.30    3.20
  -9   0  -3   -0.60    3.90
  -9   0  -3   -0.10    4.70
 -10   0  -3   -2.90    5.20
  10   0   3   11.20    5.50
 -10   0  -3   -1.90    4.20
 -10   0  -3    4.50    4.70
 -11   0  -3   -5.30    5.50
 -11   0  -3    0.40    4.60
 -11   0  -3   -2.50    4.50
 -12   0  -3    1.60    5.60
 -12   0  -3    0.10    4.50
 -12   0  -3    4.40    7.00
 -13   0  -3   -2.10    6.10
 -13  -1   3   27.10    6.90
 -13   1   3   28.00    8.00
 -13   1   3   31.10    8.40
 -12  -1   3    8.20    5.10
 -12  -1   3    6.00    4.80
 -12   1   3    0.00    4.10
 -12   1   3   16.50    6.10
 -11  -1   3   17.90    5.00
 -11  -1   3   25.60    5.50
 -11  -1   3   18.50    5.10
 -11   1   3   26.60    6.70
 -11   1   3    7.20    5.10
 -10  -1   3    6.20    3.60
 -10  -1   3   10.50    4.00
 -10  -1   3    8.90    4.20
 -10   1   3    9.50    4.60
 -10   1   3    9.30    4.60
 -10   1   3   11.00    4.30
  -9  -1   3   43.60    6.10
  -9  -1   3   42.10    6.20
  -9  -1   3   40.90    6.00
  -9   1   3   45.30    7.00
  -9   1   3   53.89    7.60
  -9   1   3   50.29    7.00
   8  -1  -3    4.90    3.80
  -8  -1   3    2.30    2.60
  -8  -1   3   -1.20    2.00
  -8  -1   3    2.30    2.50
  -8   1   3    7.70    3.70
  -8   1   3    0.80    2.70
  -8   1   3    1.30    2.50
  -7  -1   3  268.77   12.20
  -7  -1   3  289.37   12.90
  -7  -1   3  258.87   11.80
   7  -1  -3  242.68   13.60
  -7   1   3  263.97   13.50
   7   1  -3  242.98   12.30
  -7   1   3  274.57   13.30
  -7   1   3  250.17   10.00
  -7   1   3  265.37   14.00
  -6  -1   3  304.27   13.60
   6  -1  -3  302.17   14.30
  -6  -1   3  302.07   12.70
  -6  -1   3  299.77   12.50
  -6  -1   3  323.07   13.70
   6  -1  -3  305.37   14.60
  -6   1   3  301.27   13.80
  -6   1   3  305.37   10.70
   6   1  -3  330.67   13.50
  -6   1   3  305.87   12.10
  -6   1   3  324.47   15.00
  -6   1   3  298.37   14.10
   5  -1  -3    9.60    3.10
  -5  -1   3    4.90    2.10
  -5  -1   3    9.50    2.40
   5  -1  -3    3.40    2.40
  -5  -1   3    5.40    1.70
  -5  -1   3    7.40    1.80
  -5   1   3    4.10    2.20
   5   1  -3    6.80    2.30
  -5   1   3    3.60    2.50
  -5   1   3   10.10    2.60
  -5   1   3    8.60    1.70
   5   1  -3    9.30    2.30
  -5   1   3    6.50    1.90
  -4  -1   3   79.49    3.90
   4  -1  -3   83.49    6.10
  -4  -1   3   70.69    3.80
   4  -1  -3   75.49    5.90
  -4  -1   3   70.59    4.80
  -4   1   3   71.79    4.40
  -4   1   3   80.39    6.00
  -4   1   3   83.59    5.50
   4   1  -3   80.49    4.60
   4   1  -3   75.89    4.40
  -4   1   3   74.09    4.80
  -4   1   3   72.29    5.10
  -3  -1   3  238.18    9.80
   3  -1  -3  254.17   11.00
  -3  -1   3  241.18    9.70
   3  -1  -3  235.18   10.80
  -3  -1   3  232.28    8.60
  -3  -1   3  234.68    9.90
  -3  -1   3  245.58   12.20
  -3  -1   3  240.68    8.80
   3   1  -3  245.98    9.50
  -3   1   3  237.28   11.00
  -3   1   3  244.38   10.10
   3   1  -3  234.78    9.50
  -3   1   3  254.37   10.50
  -3   1   3  240.98   10.20
  -3   1   3  248.98    9.70
  -2  -1   3  389.56   13.70
  -2  -1   3  387.06   14.30
  -2  -1   3  386.26   16.00
  -2  -1   3  393.96   13.30
  -2  -1   3  387.56   14.60
   2  -1  -3  398.16   15.50
   2  -1  -3  407.46   15.50
  -2  -1   3  375.06   13.50
  -2  -1   3  404.96   14.60
  -2   1   3  399.26   14.30
  -2   1   3  375.26   14.70
   2   1  -3  402.36   14.20
  -2   1   3  395.36   15.00
  -2   1   3  396.66   15.50
  -2   1   3  384.86   14.80
   2   1  -3  382.46   14.30
   1  -1  -3   32.50    3.80
  -1  -1   3   33.90    3.60
   1  -1  -3   31.90    3.80
  -1  -1   3   30.30    3.20
  -1  -1   3   28.80    3.20
  -1  -1   3   30.40    3.60
  -1  -1   3   30.90    2.80
  -1  -1   3   28.90    2.80
  -1  -1   3   30.10    3.00
  -1   1   3   42.70    4.00
   1   1  -3   30.50    3.10
  -1   1   3   29.40    3.60
  -1   1   3   25.90    3.30
   1   1  -3   30.70    3.80
   1   1  -3   36.70    3.40
  -1   1   3   25.20    3.00
   0  -1   3   12.60    2.70
   0  -1   3   10.20    2.50
   0  -1   3   13.70    2.70
   0  -1  -3   14.00    2.60
   0  -1  -3    8.00    2.50
   0  -1   3   11.70    2.20
   0  -1  -3   12.40    2.90
   0   1   3   10.20    2.50
   0   1   3   14.70    2.80
   0   1  -3   15.80    2.90
   0   1  -3   11.20    2.40
   0   1   3    9.20    2.40
  -1  -1  -3  667.33   22.80
   1  -1   3  638.84   23.80
  -1  -1  -3  646.54   22.60
   1  -1   3  636.54   22.10
  -1  -1  -3  623.04   23.60
   1   1   3  591.64   23.50
  -1   1  -3  636.04   23.20
  -1   1  -3  668.83   22.20
  -1   1  -3  684.63   23.90
   1   1   3  617.64   22.00
   2  -1   3    8.40    3.00
  -2  -1  -3    4.80    2.40
  -2  -1  -3    4.90    1.80
  -2  -1  -3    6.70    3.00
   2  -1   3    7.60    2.90
   2  -1   3    2.50    2.10
  -2  -1  -3    7.50    2.80
  -2  -1  -3    7.80    2.50
  -2   1  -3    2.50    2.30
   2   1   3    5.00    2.30
   2   1   3    7.00    2.90
   2   1   3    9.50    2.90
  -2   1  -3    7.20    2.90
  -2   1  -3    6.30    2.50
  -2   1  -3   11.00    2.70
  -2   1  -3    9.20    3.00
  -3  -1  -3   25.60    3.90
  -3  -1  -3   22.60    4.10
   3  -1   3   22.00    4.00
  -3  -1  -3   24.50    4.00
  -3  -1  -3   25.80    4.20
  -3  -1  -3   29.20    4.10
   3  -1   3   19.90    4.10
   3  -1   3   32.70    3.80
  -3  -1  -3   18.20    3.00
  -3  -1  -3   37.10    5.20
  -3   1  -3   25.30    4.40
  -3   1  -3   26.10    4.10
  -3   1  -3   39.60    5.10
  -3   1  -3   25.30    3.90
   3   1   3   27.70    4.30
   3   1   3   27.20    3.40
  -3   1  -3   26.50    4.60
   3   1   3   28.10    4.30
  -3   1  -3   26.50    4.10
  -4  -1  -3   81.69    8.20
   4  -1   3   49.20    6.10
   4  -1   3   61.19    4.60
  -4  -1  -3   72.99    6.40
  -4  -1  -3   59.89    6.00
  -4  -1  -3   69.39    7.00
  -4  -1  -3   64.89    7.30
   4  -1   3   63.79    6.80
  -4  -1  -3   59.59    5.80
  -4  -1  -3   61.99    6.50
   4   1   3   66.29    6.50
   4   1   3   64.29    5.20
  -4   1  -3   73.99    7.30
  -4   1  -3   60.19    6.10
  -4   1  -3   70.69    7.40
  -4   1  -3   61.99    6.50
  -4   1  -3   55.79    6.80
  -4   1  -3   56.59    7.00
   4   1   3   51.09    6.00
  -5  -1  -3  432.56   19.10
  -5  -1  -3  397.86   18.30
  -5  -1  -3  423.36   17.20
  -5  -1  -3  394.76   17.60
   5  -1   3  398.86   18.70
   5  -1   3  389.96   18.70
  -5  -1  -3  404.96   19.10
  -5  -1  -3  379.86   18.20
  -5  -1  -3  423.96   17.70
  -5   1  -3  432.16   19.30
  -5   1  -3  383.36   18.70
   5   1   3  403.96   15.10
   5   1   3  389.36   18.20
   5   1   3  423.76   18.30
  -5   1  -3  405.56   18.10
  -5   1  -3  392.76   18.80
  -5   1  -3  414.46   18.10
  -6  -1  -3    0.70    1.90
  -6  -1  -3    2.60    3.10
   6  -1   3   -0.70    2.80
  -6  -1  -3    0.20    2.20
  -6  -1  -3    1.60    2.50
  -6  -1  -3   -1.30    2.60
   6  -1   3    1.60    2.90
  -6   1  -3    0.30    3.50
  -6   1  -3   -4.80    2.80
   6   1   3    0.60    2.70
  -6   1  -3    0.40    2.30
  -6   1  -3   -3.20    2.10
   6   1   3    1.40    1.80
  -6   1  -3   -1.60    2.80
   6   1   3    2.50    3.00
   7  -1   3   33.90    6.40
  -7  -1  -3   25.10    6.50
  -7  -1  -3   27.60    5.80
  -7  -1  -3   14.80    3.40
  -7  -1  -3   19.80    4.50
  -7  -1  -3   21.80    4.90
   7  -1   3   15.60    5.10
   7   1   3   21.50    5.60
  -7   1  -3   15.40    4.40
  -7   1  -3   13.20    3.90
  -7   1  -3   16.40    5.70
  -7   1  -3   17.30    5.00
  -8  -1  -3   81.79    6.30
   8  -1   3   99.69   11.60
  -8  -1  -3   89.19    9.70
  -8  -1  -3  106.29   10.30
  -8  -1  -3   82.89   11.70
  -8  -1  -3   82.09    9.70
  -8   1  -3   98.69    9.30
  -8   1  -3   75.19   10.60
  -8   1  -3  107.49   11.10
   8   1   3   90.29   10.30
  -8   1  -3   85.99   10.40
  -9  -1  -3  117.29   11.70
  -9  -1  -3  116.39   12.10
  -9  -1  -3   75.69   11.80
  -9  -1  -3   83.59   10.80
   9  -1   3  112.49   13.20
  -9   1  -3  105.49    9.60
  -9   1  -3   96.49   11.70
  -9   1  -3  105.39   11.40
   9   1   3  122.49   12.60
  -9   1  -3   93.29   12.90
 -10  -1  -3    0.00    3.60
  10  -1   3    0.80    5.20
 -10  -1  -3   17.50    7.80
 -10  -1  -3    3.00    4.50
 -10   1  -3   -3.70    3.30
 -10   1  -3   -1.10    5.60
 -10   1  -3   -1.80    3.50
 -11  -1  -3  142.49   15.00
 -11  -1  -3  126.59   13.70
 -11  -1  -3  136.39   17.10
 -11   1  -3  139.69   15.60
 -11   1  -3  107.39   15.20
 -11   1  -3  128.69   15.20
 -12  -1  -3    2.20    5.10
 -12  -1  -3    8.60    7.90
 -12  -1  -3    4.60    6.40
 -12   1  -3   11.20    6.90
 -12   1  -3    4.30    7.40
 -13  -1  -3    6.30    7.20
 -13   1  -3    9.60    7.60
 -13  -2   3    1.90    4.70
 -13   2   3   -3.10    5.40
 -13   2   3    6.40    5.60
 -12  -2   3   46.10    7.80
 -12  -2   3   69.39    9.20
 -12  -2   3   62.99    8.20
 -12   2   3   71.79   11.50
 -12   2   3   90.19   12.20
 -11  -2   3    5.90    3.90
 -11  -2   3   12.80    4.40
 -11  -2   3    3.70    3.80
 -11   2   3    5.00    4.70
 -11   2   3   11.80    6.00
 -10  -2   3   72.09    8.20
 -10  -2   3   62.59    7.80
 -10  -2   3   71.19    7.60
 -10   2   3   79.29    9.80
 -10   2   3   78.19   10.30
  -9  -2   3    1.00    2.40
   9  -2  -3    3.40    4.30
  -9  -2   3    0.20    2.40
  -9  -2   3   -0.80    2.20
  -9   2   3   -0.10    3.70
  -9   2   3    1.70    2.90
  -9   2   3    3.10    2.80
  -8  -2   3  171.08    9.40
  -8  -2   3  167.38    9.50
   8  -2  -3  161.58   11.60
  -8  -2   3  156.68    9.00
  -8   2   3  168.28   11.50
  -8   2   3  183.08   11.50
  -8   2   3  181.68    8.70
  -8   2   3  173.58   12.00
   7  -2  -3   62.79    7.70
  -7  -2   3   67.79    5.30
  -7  -2   3   57.29    5.00
  -7  -2   3   69.79    6.10
  -7  -2   3   72.59    5.10
  -7   2   3   70.69    7.60
  -7   2   3   65.99    7.80
  -7   2   3   63.79    7.10
   7   2  -3   65.89    5.90
  -7   2   3   64.59    5.90
  -6  -2   3   58.49    3.80
  -6  -2   3   58.49    4.50
  -6  -2   3   54.59    3.80
  -6  -2   3   58.69    5.10
   6  -2  -3   72.79    7.80
   6  -2  -3   59.49    6.70
  -6   2   3   71.19    6.20
   6   2  -3   59.89    4.90
  -6   2   3   51.49    3.40
  -6   2   3   57.29    6.80
  -6   2   3   58.59    6.20
  -6   2   3   49.99    6.10
   5  -2  -3  673.13   25.80
  -5  -2   3  641.64   23.00
   5  -2  -3  645.44   25.50
  -5  -2   3  644.04   22.90
  -5   2   3  661.63   24.20
  -5   2   3  644.04   25.00
  -5   2   3  635.44   24.70
   5   2  -3  624.04   22.20
  -5   2   3  622.74   21.60
  -5   2   3  655.33   25.90
  -4  -2   3  123.39    9.00
   4  -2  -3  129.19    8.00
   4  -2  -3  122.49    8.10
  -4  -2   3  121.29    5.70
  -4   2   3  117.19    7.80
  -4   2   3  128.19    7.60
   4   2  -3  120.79    5.00
  -4   2   3  108.79    7.10
  -4   2   3  121.99    7.20
  -4   2   3  126.69    6.10
   3  -2  -3  109.09    7.10
   3  -2  -3  107.59    7.20
  -3  -2   3  106.89    5.00
  -3  -2   3   93.89    7.50
  -3  -2   3  110.59    5.10
  -3   2   3  106.29    6.50
  -3   2   3  119.39    7.30
  -3   2   3  110.59    6.60
  -3   2   3  113.19    6.80
  -2  -2   3  207.88    7.20
   2  -2  -3  208.38   10.10
  -2  -2   3  215.58   10.40
  -2  -2   3  216.98    8.40
  -2  -2   3  194.18    7.10
  -2  -2   3  207.28    8.30
   2  -2  -3  208.28   10.00
  -2   2   3  206.98    9.70
  -2   2   3  196.78    9.90
   2   2  -3  211.88    7.90
   2   2  -3  202.58    8.00
  -2   2   3  191.18    9.30
  -1  -2   3    3.90    1.90
   1  -2  -3    4.80    2.60
  -1  -2   3    4.20    2.00
  -1  -2   3    5.60    1.80
  -1  -2   3    3.30    1.40
  -1  -2   3    2.40    1.50
   1  -2  -3    5.90    2.60
   1   2  -3    5.40    1.90
  -1   2   3    4.80    2.30
   1   2  -3    7.90    1.90
   1   2  -3    8.10    2.60
  -1   2   3    5.50    2.50
  -1   2   3    5.00    2.30
   0  -2   3   24.70    3.10
   0  -2  -3   14.40    2.90
   0  -2  -3   17.90    3.40
   0  -2  -3   23.20    2.90
   0  -2   3   20.50    3.10
   0  -2   3   17.80    2.60
   0  -2   3   20.30    3.20
   0   2  -3   17.00    2.90
   0   2   3   23.40    3.60
   0   2  -3   14.20    3.10
   0   2   3   22.30    3.20
   1  -2   3  189.38    9.60
   1  -2   3  185.58    9.30
  -1  -2  -3  168.88    9.30
  -1  -2  -3  190.58    9.40
  -1  -2  -3  185.18    8.30
   1  -2   3  198.58    9.90
  -1   2  -3  212.98    9.90
  -1   2  -3  194.38    8.30
   1   2   3  199.78    9.40
   1   2   3  198.88    9.50
  -1   2  -3  215.98    9.90
  -2  -2  -3  635.94   22.10
  -2  -2  -3  607.84   23.60
  -2  -2  -3  614.34   23.00
   2  -2   3  604.14   23.90
  -2  -2  -3  605.84   22.70
   2  -2   3  606.64   24.20
  -2  -2  -3  620.14   23.10
  -2   2  -3  654.63   23.50
  -2   2  -3  643.44   24.30
  -2   2  -3  644.74   22.10
  -2   2  -3  589.34   23.30
  -2   2  -3  631.64   23.70
   2   2   3  610.44   23.10
   2   2   3  625.34   23.50
  -3  -2  -3   78.69    5.60
  -3  -2  -3   75.99    6.70
  -3  -2  -3   70.59    5.40
  -3  -2  -3   80.99    5.80
  -3  -2  -3   83.49    7.40
   3  -2   3   91.49    7.90
  -3  -2  -3   92.19    7.90
   3  -2   3   68.19    6.80
   3   2   3   74.89    5.90
  -3   2  -3   83.49    6.90
   3   2   3   79.89    6.20
   3   2   3   69.39    5.20
  -3   2  -3   77.49    7.10
  -3   2  -3   66.99    6.80
  -3   2  -3   74.29    7.10
  -3   2  -3   85.89    7.30
   4  -2   3   64.49    7.50
  -4  -2  -3   80.19    8.00
  -4  -2  -3   85.09    7.60
  -4  -2  -3   76.59    5.90
  -4  -2  -3   59.39    5.60
  -4  -2  -3   78.69    5.80
  -4  -2  -3   79.79    7.80
  -4  -2  -3   63.69    6.60
   4  -2   3   71.39    7.50
  -4   2  -3   89.59    8.50
  -4   2  -3   61.79    6.30
   4   2   3   76.49    5.30
  -4   2  -3   79.69    7.70
  -4   2  -3   86.89    8.50
   4   2   3   75.09    6.90
   4   2   3   64.99    6.40
   5  -2   3   18.90    4.60
  -5  -2  -3   22.80    4.50
  -5  -2  -3   14.80    4.60
  -5  -2  -3   25.10    3.90
   5  -2   3   23.50    5.20
  -5  -2  -3   31.40    4.60
  -5  -2  -3   14.60    4.60
  -5  -2  -3   20.60    3.70
   5   2   3   23.90    3.40
  -5   2  -3   23.30    4.40
   5   2   3   24.70    4.50
  -5   2  -3   14.30    4.50
  -5   2  -3   23.70    4.60
  -5   2  -3   24.00    5.70
  -5   2  -3   25.30    5.10
   5   2   3   23.60    4.20
   6  -2   3  161.78   11.90
   6  -2   3  166.98   11.90
  -6  -2  -3  180.58    9.30
  -6  -2  -3  181.98   11.30
  -6  -2  -3  194.98   10.90
  -6  -2  -3  182.68   12.50
  -6  -2  -3  170.98   10.60
   6   2   3  190.88    8.70
  -6   2  -3  192.38   12.80
  -6   2  -3  201.18   11.50
  -6   2  -3  174.58   11.50
  -6   2  -3  175.98   12.50
   6   2   3  200.08   11.40
   6   2   3  186.78   11.20
  -6   2  -3  177.98   12.20
  -7  -2  -3  126.09    9.50
  -7  -2  -3  105.59    9.80
   7  -2   3  104.39   11.00
  -7  -2  -3  118.39    7.00
   7  -2   3  136.89   12.80
  -7  -2  -3  120.59   12.80
  -7  -2  -3  130.09    9.30
  -7   2  -3  103.29   10.20
  -7   2  -3  110.89   10.10
   7   2   3  123.19   11.10
  -7   2  -3   89.49   10.30
  -7   2  -3  107.39   11.80
   8  -2   3   -2.50    4.10
  -8  -2  -3   -0.30    4.60
  -8  -2  -3   -0.90    3.10
  -8  -2  -3    4.50    3.20
  -8  -2  -3   -0.90    2.80
  -8   2  -3    1.90    4.20
  -8   2  -3   -1.20    3.40
  -8   2  -3   -2.10    3.10
  -8   2  -3   -2.70    2.40
   8   2   3   -5.10    3.20
  -9  -2  -3  150.38   11.80
  -9  -2  -3  146.49   11.60
  -9  -2  -3  149.09   16.40
  -9  -2  -3  140.99   13.10
   9  -2   3  146.49   15.40
  -9   2  -3  142.99   14.20
   9   2   3  143.49   13.50
  -9   2  -3  151.78   10.60
  -9   2  -3  168.38   17.50
  -9   2  -3  177.38   16.00
 -10  -2  -3   60.89   11.10
 -10  -2  -3   85.49   10.50
  10  -2   3   65.69   10.80
 -10  -2  -3   59.39    8.80
 -10   2  -3   91.89   12.10
 -10   2  -3   61.49   11.90
 -10   2  -3   58.19    9.70
 -11  -2  -3   27.10    9.00
 -11  -2  -3   30.30    7.20
 -11  -2  -3   18.10    6.80
  11  -2   3   38.40    8.70
 -11   2  -3   18.40    8.60
 -11   2  -3   24.50    8.20
 -12  -2  -3   22.70    7.30
 -12  -2  -3   23.00    7.70
 -12   2  -3    9.80    7.40
 -12   2  -3    6.60    6.70
 -13  -2  -3   41.20    9.60
 -13  -2  -3   56.59   10.60
 -13   2  -3   45.10   11.50
 -13   2  -3   59.69   13.70
 -13  -3   3   19.10    5.90
 -13   3   3   20.20    7.90
 -13   3   3   20.50    8.20
 -12  -3   3   13.50    5.00
 -12  -3   3   22.00    5.70
 -12   3   3   16.40    6.70
 -12   3   3   13.40    6.80
 -11  -3   3    4.60    3.80
 -11  -3   3    6.40    3.30
 -11  -3   3    3.10    3.40
 -11   3   3    7.80    4.80
 -11   3   3   -1.00    4.90
 -10  -3   3    4.90    3.10
 -10  -3   3    0.50    2.40
  10  -3  -3   -4.50    4.20
 -10  -3   3   -3.00    2.30
 -10   3   3   10.00    5.40
 -10   3   3   -3.60    3.20
  -9  -3   3  195.88   10.80
  -9  -3   3  200.28   10.80
   9  -3  -3  200.48   14.60
  -9  -3   3  216.38   10.80
  -9   3   3  227.38   14.80
  -9   3   3  196.88   14.30
  -9   3   3  218.68   14.30
  -8  -3   3   42.50    4.60
   8  -3  -3   40.20    7.20
  -8  -3   3   36.00    4.30
  -8  -3   3   41.20    4.50
  -8   3   3   44.50    7.20
  -8   3   3   35.60    6.90
  -8   3   3   31.00    6.00
  -8   3   3   34.70    5.20
   7  -3  -3   17.40    5.10
  -7  -3   3   15.50    2.40
  -7  -3   3   14.90    2.70
  -7  -3   3   17.80    3.00
   7  -3  -3   24.00    5.30
  -7  -3   3   18.10    2.50
  -7   3   3   16.60    2.30
  -7   3   3   25.20    5.30
  -7   3   3   11.30    4.00
  -7   3   3    6.30    3.00
  -7   3   3   23.50    4.20
   6  -3  -3    0.70    2.70
  -6  -3   3    1.20    1.30
  -6  -3   3    1.80    1.50
   6  -3  -3   -2.10    2.80
   6   3  -3    1.10    1.40
  -6   3   3    3.80    2.60
  -6   3   3    3.80    3.10
  -6   3   3    2.20    1.60
  -6   3   3    1.70    2.30
  -6   3   3   -0.70    2.00
  -5  -3   3    0.70    1.10
   5  -3  -3   -1.50    2.50
  -5  -3   3    1.60    3.20
  -5  -3   3    0.50    1.00
   5  -3  -3    0.00    2.60
  -5   3   3    2.00    2.20
  -5   3   3    4.00    2.60
  -5   3   3   -1.50    2.30
  -5   3   3    0.10    2.20
  -4  -3   3  266.77    9.40
   4  -3  -3  252.97   13.30
   4  -3  -3  267.17   13.40
  -4  -3   3  253.67   14.10
  -4   3   3  253.77   12.30
  -4   3   3  257.17   12.50
  -4   3   3  276.27   13.40
  -4   3   3  255.37   12.70
   3  -3  -3  357.56   15.40
  -3  -3   3  327.17   11.80
  -3  -3   3  350.06   15.90
   3  -3  -3  319.67   15.10
  -3  -3   3  333.27   11.80
  -3   3   3  324.87   15.00
  -3   3   3  322.77   14.50
  -3   3   3  323.57   14.30
  -3   3   3  329.97   14.40
   2  -3  -3  251.07   12.20
  -2  -3   3  261.87   10.00
   2  -3  -3  263.07   12.50
  -2  -3   3  251.97   10.00
  -2  -3   3  248.28   12.20
   2   3  -3  262.27    9.50
   2   3  -3  251.47    9.60
  -2   3   3  262.97   12.30
  -2   3   3  244.18   11.70
  -2   3   3  255.57   11.80
  -1  -3   3 2161.58   73.39
  -1  -3   3 2193.18   71.89
  -1  -3   3 2136.69   73.29
   1  -3  -3 2283.37   74.29
  -1  -3   3 2222.48   71.59
   1  -3  -3 2142.39   74.89
  -1  -3   3 2199.58   71.69
  -1   3   3 2344.27   73.69
  -1   3   3 2229.48   74.79
   1   3  -3 2209.08   73.19
   1   3  -3 2201.28   72.29
  -1   3   3 2234.08   73.69
   0  -3   3  853.91   29.20
   0  -3   3  772.92   29.70
   0  -3  -3  810.42   30.10
   0  -3  -3  807.82   29.40
   0  -3   3  821.02   29.30
   0  -3  -3  854.01   30.60
   0  -3   3  842.72   29.00
   0   3  -3  822.22   29.70
   0   3  -3  894.51   29.80
   0   3   3  835.92   30.40
   0   3   3  852.41   29.90
  -1  -3  -3  560.14   20.70
  -1  -3  -3  530.95   21.40
   1  -3   3  593.04   22.10
   1  -3   3  557.44   21.40
  -1  -3  -3  554.44   21.10
  -1  -3  -3  533.45   20.80
  -1  -3  -3  543.65   20.60
  -1  -3  -3  548.65   19.10
  -1   3  -3  565.04   21.30
  -1   3  -3  515.35   21.30
  -1   3  -3  546.25   18.80
   1   3   3  573.84   21.00
  -1   3  -3  581.84   21.40
   1   3   3  537.55   21.20
  -2  -3  -3   -1.00    2.50
  -2  -3  -3    3.50    2.10
  -2  -3  -3    2.00    2.20
  -2  -3  -3    0.50    1.70
  -2  -3  -3    0.90    2.30
  -2  -3  -3    3.60    1.80
   2  -3   3    3.00    2.90
   2  -3   3    0.10    2.50
  -2  -3  -3    3.00    1.80
   2   3   3    0.90    2.20
  -2   3  -3   -4.30    2.00
  -2   3  -3    2.60    2.80
  -2   3  -3    2.70    2.10
   2   3   3   -1.00    2.00
  -2   3  -3    5.40    2.90
   3  -3   3   14.40    4.00
  -3  -3  -3   20.00    3.30
  -3  -3  -3   20.70    4.50
  -3  -3  -3   20.80    3.20
  -3  -3  -3   19.90    3.60
  -3  -3  -3   17.80    3.70
   3  -3   3   16.20    4.40
  -3  -3  -3   24.90    3.50
  -3  -3  -3   24.70    4.30
  -3   3  -3   14.60    3.80
  -3   3  -3   15.50    3.50
  -3   3  -3   18.50    4.30
  -3   3  -3   11.00    3.60
   3   3   3   11.30    3.10
   3   3   3    9.90    2.90
  -4  -3  -3    2.30    2.40
   4  -3   3    4.70    3.60
  -4  -3  -3   -0.40    1.70
   4  -3   3    2.20    2.90
  -4  -3  -3    1.30    2.60
  -4  -3  -3    1.80    3.10
  -4  -3  -3    4.30    3.30
  -4  -3  -3    1.70    2.00
  -4  -3  -3   -1.30    1.80
  -4   3  -3    7.60    3.20
  -4   3  -3    5.00    3.00
   4   3   3    1.50    2.40
  -4   3  -3    2.20    3.10
   4   3   3   -0.60    2.30
  -4   3  -3    2.00    2.60
  -5  -3  -3   92.39    6.60
   5  -3   3   89.69    9.10
  -5  -3  -3   93.49    7.30
  -5  -3  -3   90.79    6.70
   5  -3   3   70.59    8.60
  -5  -3  -3   74.99    5.40
  -5  -3  -3   85.89    8.90
  -5  -3  -3   67.49    8.00
   5   3   3   91.09    8.20
   5   3   3   83.89    5.80
  -5   3  -3   85.09    9.30
  -5   3  -3   81.49    9.00
   5   3   3   95.99    7.30
  -5   3  -3   98.89    9.30
  -5   3  -3  105.39   10.00
  -5   3  -3   98.89    9.30
  -6  -3  -3   -0.30    2.60
   6  -3   3    9.20    4.10
   6  -3   3    3.30    3.80
  -6  -3  -3   -1.10    3.30
  -6  -3  -3    0.60    1.60
  -6  -3  -3   -1.90    2.10
  -6  -3  -3    1.50    2.20
  -6   3  -3    0.50    2.80
  -6   3  -3   -2.10    2.80
  -6   3  -3   -4.80    3.10
  -6   3  -3    2.30    3.60
   6   3   3   -3.20    2.30
   6   3   3    2.10    2.80
  -6   3  -3    4.60    3.20
   6   3   3   -3.10    1.50
  -7  -3  -3    3.00    2.80
  -7  -3  -3   -0.70    2.20
   7  -3   3   -2.60    3.50
  -7  -3  -3   -2.20    1.30
  -7  -3  -3    1.70    2.90
   7  -3   3   -0.60    3.30
  -7  -3  -3   -0.20    3.40
   7   3   3   -0.20    2.90
  -7   3  -3   -0.40    2.80
  -7   3  -3   -3.20    2.50
   7   3   3    1.50    2.40
  -7   3  -3    1.90    3.80
  -7   3  -3   -1.10    3.70
  -8  -3  -3   26.30    5.90
  -8  -3  -3   22.80    5.10
   8  -3   3   15.40    6.10
  -8  -3  -3   28.80    5.70
  -8  -3  -3   27.70    7.00
  -8   3  -3   27.20    6.70
  -8   3  -3   26.70    7.30
  -8   3  -3   20.00    5.80
  -8   3  -3   24.90    5.60
   8   3   3   25.20    5.80
  -9  -3  -3    6.20    5.70
   9  -3   3   10.90    6.00
  -9  -3  -3   18.30    5.40
  -9  -3  -3    8.70    4.10
  -9  -3  -3    2.60    3.90
  -9   3  -3    8.30    5.10
  -9   3  -3    2.90    4.60
  -9   3  -3    8.40    5.10
  -9   3  -3   13.30    4.50
  10  -3   3   12.80    6.20
 -10  -3  -3   28.50    8.80
 -10  -3  -3   15.10    5.40
 -10  -3  -3   13.30    5.70
 -10   3  -3   24.90    7.60
 -10   3  -3   20.00    8.10
 -11  -3  -3    0.80    4.50
 -11  -3  -3   -4.30    5.70
 -11  -3  -3   -3.00    4.40
  11  -3   3    3.40    5.80
 -11   3  -3    7.90    6.10
 -11   3  -3    6.10    6.30
 -12  -3  -3   -1.70    4.90
 -12  -3  -3    5.80    5.30
 -12   3  -3   -0.70    6.30
 -12   3  -3  -12.30    5.60
 -13  -3  -3    4.20    6.00
 -13  -3  -3   18.70    7.70
 -13   3  -3   16.10    8.80
 -13   3  -3    4.50    7.60
 -13  -4   3   33.70    7.20
 -13  -4   3   28.30    6.40
 -13   4   3   32.90    9.30
 -12  -4   3   42.60    6.80
 -12  -4   3   21.40    5.70
 -12   4   3   42.20    9.70
 -11  -4   3   87.09    9.00
 -11  -4   3   96.19    9.20
 -11   4   3   98.29   13.40
 -11   4   3  109.89   13.40
  10  -4  -3   -1.90    4.30
 -10  -4   3    3.00    2.60
 -10  -4   3    3.30    2.20
 -10  -4   3   -0.40    2.70
 -10   4   3    2.20    4.70
 -10   4   3    4.90    4.30
  -9  -4   3   82.09    5.50
  -9  -4   3   79.69    6.10
  -9  -4   3   84.09    6.20
   9  -4  -3   89.99   11.50
  -9   4   3   71.99   10.10
  -9   4   3   76.59   10.30
  -8  -4   3   53.19    4.50
  -8  -4   3   61.79    4.40
  -8  -4   3   60.19    4.30
   8  -4  -3   79.69   10.30
  -8   4   3   49.99    8.20
  -8   4   3   54.69    7.70
  -8   4   3   63.19    8.10
  -8   4   3   55.79    7.00
   7  -4  -3   31.00    6.10
   7  -4  -3   15.40    5.50
  -7  -4   3   22.60    2.50
  -7   4   3   24.30    4.90
  -7   4   3   28.80    5.00
  -7   4   3   24.10    5.60
  -7   4   3   29.50    3.50
  -7   4   3   23.90    5.90
   6  -4  -3    3.20    3.40
   6  -4  -3    2.20    3.20
  -6  -4   3    5.20    3.90
  -6   4   3    0.00    2.50
  -6   4   3    7.30    3.20
  -6   4   3    2.10    3.20
  -6   4   3    3.50    2.60
   5  -4  -3  246.28   13.70
  -5  -4   3  225.88   14.10
   5  -4  -3  240.78   13.30
  -5   4   3  234.28   12.80
  -5   4   3  243.28   12.50
  -5   4   3  224.78   12.30
  -5   4   3  214.78   13.00
   4  -4  -3  575.24   23.90
  -4  -4   3  567.84   24.40
   4  -4  -3  543.15   23.60
  -4   4   3  551.64   22.70
  -4   4   3  592.54   23.40
  -4   4   3  560.14   23.70
  -4   4   3  537.55   22.50
  -3  -4   3  130.89    9.50
  -3  -4   3  143.79    5.90
   3  -4  -3  141.99    9.40
   3  -4  -3  152.88    9.40
  -3  -4   3  147.99    6.00
  -3   4   3  144.99    9.00
  -3   4   3  137.39    8.80
  -3   4   3  145.89    9.30
  -2  -4   3  872.41   28.90
   2  -4  -3  948.41   33.70
   2  -4  -3  924.81   33.20
  -2  -4   3  836.92   28.80
  -2  -4   3  883.01   30.50
  -2  -4   3  884.41   30.40
  -2   4   3  843.02   32.30
  -2   4   3  869.01   33.10
   2   4  -3  914.01   31.70
   2   4  -3  871.51   29.90
  -2   4   3  906.91   32.50
  -1  -4   3 1442.16   48.80
  -1  -4   3 1456.35   48.80
  -1  -4   3 1413.36   50.19
  -1  -4   3 1458.55   48.80
  -1  -4   3 1417.96   50.09
   1  -4  -3 1501.05   51.99
   1  -4  -3 1529.05   51.49
  -1   4   3 1524.25   50.99
  -1   4   3 1529.05   51.79
   1   4  -3 1466.15   49.90
   1   4  -3 1508.55   49.80
   0  -4   3    8.30    2.40
   0  -4   3    8.70    2.80
   0  -4  -3   15.70    3.60
   0  -4  -3   10.50    2.70
   0  -4  -3    7.90    3.10
   0  -4   3    8.30    2.50
   0  -4   3   15.40    3.40
   0   4   3    7.20    2.80
   0   4   3   10.20    3.00
   0   4  -3   15.50    3.10
   0   4  -3   12.90    3.00
   0   4  -3   13.70    3.30
   1  -4   3  211.68   11.30
  -1  -4  -3  234.78   11.00
  -1  -4  -3  224.28   11.30
  -1  -4  -3  216.58   10.40
  -1  -4  -3  220.18    9.20
   1  -4   3  217.68   11.20
  -1  -4  -3  231.78   11.00
  -1  -4  -3  215.68   10.70
  -1   4  -3  228.08   11.20
  -1   4  -3  218.88    8.50
  -1   4  -3  235.38   11.30
   1   4   3  223.38   11.00
   1   4   3  223.88   10.80
  -1   4  -3  233.38   11.20
  -2  -4  -3  107.89    7.70
  -2  -4  -3  106.79    7.10
   2  -4   3  116.99    7.90
  -2  -4  -3  135.29    8.30
  -2  -4  -3  122.09    7.30
   2  -4   3  134.69    8.70
  -2  -4  -3  127.69    7.10
  -2  -4  -3  121.79    5.70
   2  -4   3  128.99    8.60
  -2  -4  -3  118.79    7.10
  -2   4  -3  135.59    8.60
  -2   4  -3  131.79    8.70
   2   4   3  125.69    7.50
   2   4   3  141.49    7.90
  -2   4  -3  123.49    8.30
  -3  -4  -3  499.45   20.90
  -3  -4  -3  509.95   20.10
  -3  -4  -3  511.75   19.90
  -3  -4  -3  509.95   20.30
   3  -4   3  524.25   22.20
  -3  -4  -3  497.25   20.90
  -3  -4  -3  498.55   19.80
  -3  -4  -3  514.65   18.70
   3  -4   3  517.35   22.30
  -3   4  -3  553.24   21.70
  -3   4  -3  550.04   22.60
   3   4   3  501.25   20.20
  -3   4  -3  520.25   21.80
  -3   4  -3  490.95   21.50
   3   4   3  516.45   20.60
   4  -4   3  208.38   12.40
  -4  -4  -3  191.08   10.20
  -4  -4  -3  203.18    9.50
   4  -4   3  190.88   12.20
  -4  -4  -3  207.18   10.90
  -4  -4  -3  198.78   11.30
  -4  -4  -3  204.28   10.20
  -4  -4  -3  200.38   11.80
  -4  -4  -3  195.88   10.50
   4   4   3  201.58   10.50
   4   4   3  211.18   10.70
  -4   4  -3  179.28   11.50
  -4   4  -3  203.28   11.70
  -4   4  -3  196.48   12.40
  -4   4  -3  198.48   12.10
  -5  -4  -3   70.19    7.20
   5  -4   3   77.49    9.20
  -5  -4  -3   73.29    6.60
  -5  -4  -3   83.09    6.40
   5  -4   3   85.29    9.30
  -5  -4  -3   65.49    8.40
  -5  -4  -3   77.19    5.00
  -5  -4  -3   77.89    9.00
  -5   4  -3   63.99    8.40
   5   4   3   86.89    7.90
  -5   4  -3   84.39    8.80
  -5   4  -3   87.89    9.60
  -5   4  -3   76.49    8.30
   5   4   3   83.29    7.40
  -5   4  -3   73.99    9.00
  -6  -4  -3   78.79    7.50
   6  -4   3   84.69    9.70
  -6  -4  -3   79.99    7.30
  -6  -4  -3   91.19   10.40
  -6  -4  -3   74.99    4.60
   6  -4   3   84.29   10.40
  -6  -4  -3   70.29    9.40
  -6  -4  -3   71.39    7.50
  -6   4  -3   94.19   10.40
  -6   4  -3   81.49   10.30
  -6   4  -3   67.79    7.90
  -6   4  -3   76.09    8.80
   6   4   3   92.59    6.20
   6   4   3   82.19    8.10
  -6   4  -3   72.69    9.00
  -7  -4  -3  165.78   11.20
  -7  -4  -3  172.08   10.70
   7  -4   3  181.08   15.70
  -7  -4  -3  158.88   10.60
   7  -4   3  193.98   14.10
  -7  -4  -3  155.78   14.70
   7   4   3  173.98    8.90
  -7   4  -3  155.28   12.50
  -7   4  -3  185.38   12.90
   7   4   3  160.08   10.90
  -7   4  -3  181.28   12.20
  -7   4  -3  151.78   14.20
   8  -4   3    4.40    4.50
  -8  -4  -3    0.30    2.90
  -8  -4  -3   -0.90    3.00
  -8  -4  -3   12.50    6.00
  -8  -4  -3    5.60    3.60
  -8   4  -3    1.60    4.70
   8   4   3    4.70    4.20
  -8   4  -3    5.20    3.70
  -8   4  -3    0.20    4.50
  -8   4  -3    0.60    3.70
  -9  -4  -3   24.20    5.70
   9  -4   3   31.90    8.30
  -9  -4  -3   45.80    9.80
  -9  -4  -3   38.30    6.90
  -9  -4  -3   43.50    7.10
  -9   4  -3   49.50    9.80
  -9   4  -3   47.60    7.70
  -9   4  -3   38.30    8.40
 -10  -4  -3   74.69   13.00
 -10  -4  -3   55.19    8.40
 -10  -4  -3   66.19    9.10
 -10  -4  -3   17.10    5.40
  10  -4   3   33.40    8.60
 -10   4  -3   44.80    7.50
 -10   4  -3   48.80    9.80
 -10   4  -3   28.60    8.80
  11  -4   3   -0.30    5.30
 -11  -4  -3   11.40    5.50
 -11  -4  -3    0.50    4.60
 -11   4  -3    0.00    5.70
 -11   4  -3   13.00    7.90
 -12  -4  -3    9.20    5.40
 -12  -4  -3    1.90    4.70
  12  -4   3    5.70    7.40
 -12   4  -3   -1.80    6.20
 -12   4  -3   -3.20    6.00
 -13  -4  -3   75.99   11.20
 -13  -4  -3   81.59   12.20
 -13   4  -3   67.79   13.50
 -13   4  -3   73.99   14.80
 -13  -5   3   41.80    7.40
 -13   5   3   49.10   11.60
 -12  -5   3    1.80    3.20
 -12  -5   3    1.50    3.50
 -12   5   3   -4.00    5.50
 -11  -5   3   75.39    7.90
 -11  -5   3   70.29    7.70
  11  -5  -3   58.29   10.90
 -11   5   3   80.09   12.20
 -10  -5   3  282.77   13.30
  10  -5  -3  266.67   19.00
 -10  -5   3  264.57   13.10
 -10   5   3  276.67   19.20
 -10   5   3  322.37   20.00
   9  -5  -3  128.59   14.10
  -9  -5   3  125.59    7.20
  -9  -5   3  132.89    7.30
  -9   5   3  142.89   14.60
  -9   5   3  122.49   13.40
  -9   5   3  133.49   11.80
  -8  -5   3   89.09    4.50
  -8  -5   3   80.99    4.50
   8  -5  -3   83.49   11.00
  -8   5   3   60.39    8.80
  -8   5   3   81.09   10.70
  -8   5   3   97.89    9.50
  -7  -5   3   85.99   11.50
   7  -5  -3   73.29    9.80
   7  -5  -3   89.39   10.30
  -7   5   3   86.59   10.20
  -7   5   3   88.99    9.10
  -7   5   3   72.59    9.10
  -7   5   3   88.69   10.30
   6  -5  -3   81.99    9.30
  -6  -5   3   67.89    9.50
   6  -5  -3   59.39    8.20
  -6   5   3   68.99    8.50
  -6   5   3   67.19    7.90
  -6   5   3   59.39    8.50
  -6   5   3   59.49    7.10
  -5  -5   3    5.90    3.90
   5  -5  -3    6.50    3.60
   5  -5  -3   -1.80    3.10
  -5   5   3    1.60    2.90
  -5   5   3    6.20    3.30
  -5   5   3    9.20    3.30
  -5   5   3    2.90    3.10
   4  -5  -3   36.60    6.20
  -4  -5   3   26.10    5.40
   4  -5  -3   38.00    6.20
  -4   5   3   40.90    5.80
  -4   5   3   38.80    6.00
  -4   5   3   31.30    5.80
  -4   5   3   32.80    4.80
  -3  -5   3  499.55   21.90
  -3  -5   3  496.05   17.50
   3  -5  -3  449.56   21.30
   3  -5  -3  504.15   21.80
  -3  -5   3  503.45   17.70
  -3   5   3  543.25   21.40
  -3   5   3  458.05   21.10
  -3   5   3  475.25   20.70
   2  -5  -3  257.37   13.50
   2  -5  -3  269.27   13.90
  -2  -5   3  239.58   10.90
  -2  -5   3  259.27    9.90
  -2  -5   3  265.57   10.80
  -2  -5   3  260.77    9.90
  -2   5   3  246.18   13.10
   2   5  -3  258.07   10.40
   2   5  -3  271.97   12.20
  -2   5   3  263.07   13.00
  -2   5   3  261.07   12.90
   1  -5  -3  174.18   10.40
  -1  -5   3  172.38    8.20
  -1  -5   3  181.38    8.20
  -1  -5   3  169.68    8.90
   1  -5  -3  172.58    9.50
   1  -5  -3  173.38   10.10
  -1  -5   3  170.08    8.10
   1   5  -3  163.18    8.40
  -1   5   3  168.88    9.80
  -1   5   3  175.48    9.90
   1   5  -3  164.48    8.30
   1   5  -3  178.48    9.20
   0  -5   3   26.30    3.80
   0  -5   3   25.20    3.90
   0  -5  -3   28.20    4.80
   0  -5  -3   25.40    4.10
   0  -5   3   18.40    3.80
   0  -5  -3   19.60    3.90
   0   5  -3   23.70    4.00
   0   5  -3   16.90    3.30
   0   5   3   28.50    4.40
   0   5   3   23.30    4.40
   0   5  -3   17.00    3.40
  -1  -5  -3 1187.88   43.90
  -1  -5  -3 1234.58   43.30
   1  -5   3 1227.88   44.40
  -1  -5  -3 1250.87   41.80
  -1  -5  -3 1214.68   39.40
   1  -5   3 1237.28   43.00
   1  -5   3 1233.58   43.70
  -1  -5  -3 1233.08   42.60
  -1  -5  -3 1163.88   42.80
  -1   5  -3 1271.07   43.00
   1   5   3 1143.79   43.40
   1   5   3 1211.28   43.00
  -1   5  -3 1277.97   44.10
  -1   5  -3 1224.98   43.40
  -2  -5  -3  446.96   18.30
  -2  -5  -3  457.45   18.30
   2  -5   3  443.36   19.10
  -2  -5  -3  466.95   17.20
  -2  -5  -3  451.25   18.10
  -2  -5  -3  433.76   18.90
   2  -5   3  417.56   19.80
  -2  -5  -3  467.05   18.90
   2  -5   3  471.85   19.90
  -2   5  -3  485.95   19.70
  -2   5  -3  454.85   19.40
   2   5   3  440.86   18.40
  -2   5  -3  419.86   19.50
   2   5   3  450.05   18.70
  -3  -5  -3    6.10    2.40
  -3  -5  -3    3.90    2.40
  -3  -5  -3    2.90    2.60
  -3  -5  -3    3.10    3.10
  -3  -5  -3    1.20    2.30
   3  -5   3    0.60    2.90
   3  -5   3    7.10    3.50
  -3  -5  -3    9.50    3.00
   3   5   3    3.00    2.40
  -3   5  -3    7.30    3.50
  -3   5  -3    8.60    3.50
  -3   5  -3    5.10    3.00
  -3   5  -3    5.40    3.20
   3   5   3    9.10    2.80
  -4  -5  -3   74.09    6.60
  -4  -5  -3   81.19    6.10
   4  -5   3   83.39    9.40
  -4  -5  -3   76.19    8.10
  -4  -5  -3   85.49    7.80
  -4  -5  -3   83.09    8.00
  -4  -5  -3   79.49    7.30
  -4  -5  -3   73.29    5.20
   4  -5   3   62.09    8.00
  -4   5  -3   79.99    9.00
  -4   5  -3   78.09    8.20
  -4   5  -3   75.89    8.60
   4   5   3   68.59    6.70
  -4   5  -3   72.29    8.10
   4   5   3   80.79    7.30
  -5  -5  -3    5.50    3.50
  -5  -5  -3    5.40    2.70
  -5  -5  -3   10.80    3.00
  -5  -5  -3    7.10    3.90
   5  -5   3    2.20    3.40
  -5  -5  -3    6.10    3.00
   5  -5   3   -0.40    3.80
  -5  -5  -3    5.90    1.70
  -5  -5  -3    1.00    2.80
   5   5   3    6.80    3.10
  -5   5  -3   -1.10    3.20
  -5   5  -3    1.60    3.20
  -5   5  -3   10.70    4.10
  -5   5  -3   10.60    4.80
   5   5   3    3.00    2.30
  -5   5  -3    3.90    3.90
   6  -5   3   94.69   10.80
  -6  -5  -3   83.69    8.10
  -6  -5  -3   79.39    9.90
   6  -5   3   77.29    9.90
  -6  -5  -3   73.79    7.20
  -6  -5  -3   70.99    7.20
  -6  -5  -3   98.79   11.00
  -6   5  -3   72.09   10.00
  -6   5  -3   84.19    9.90
   6   5   3   80.39    8.00
  -6   5  -3   55.09    7.40
  -6   5  -3   55.89    8.20
  -6   5  -3   90.59   10.30
  -7  -5  -3  358.76   19.50
   7  -5   3  372.26   20.60
  -7  -5  -3  336.57   16.20
   7  -5   3  326.47   19.60
  -7  -5  -3  345.07   17.10
  -7  -5  -3  333.07   16.50
  -7   5  -3  326.07   19.20
   7   5   3  361.06   17.20
  -7   5  -3  343.67   19.90
  -7   5  -3  332.87   19.30
  -7   5  -3  325.37   18.30
   7   5   3  327.37   14.60
  -8  -5  -3  196.78   12.50
  -8  -5  -3  198.78   12.30
   8  -5   3  204.88   18.40
  -8  -5  -3  202.98   12.50
  -8  -5  -3  181.08   17.00
  -8   5  -3  187.28   13.70
  -8   5  -3  194.68   15.30
  -8   5  -3  209.58   15.70
  -9  -5  -3   -1.90    3.20
  -9  -5  -3    3.30    5.40
  -9  -5  -3   13.90    4.40
   9  -5   3    3.40    5.00
  -9  -5  -3   12.80    4.50
  -9   5  -3    1.80    4.70
  -9   5  -3   14.50    5.70
  -9   5  -3   10.50    6.40
 -10  -5  -3    0.80    3.60
 -10  -5  -3   -0.60    3.10
 -10  -5  -3    1.80    3.90
  10  -5   3   -0.30    5.20
 -10   5  -3   -5.80    4.50
 -10   5  -3   -3.00    3.60
 -10   5  -3   -5.70    5.00
 -11  -5  -3   36.10    7.70
 -11  -5  -3   34.30    7.30
  11  -5   3   39.80   10.60
 -11   5  -3   26.70    9.10
 -11   5  -3   24.20    9.30
 -12  -5  -3   13.40    5.60
 -12  -5  -3   15.50    6.30
  12  -5   3   26.60    9.20
 -12   5  -3   19.00    9.10
 -12   5  -3    1.90    7.40
 -13  -6   3    3.80    3.80
 -13   6   3   12.60    8.10
 -12  -6   3   -3.50    2.90
 -12   6   3   -0.40    6.20
  11  -6  -3   -1.30    5.30
 -11  -6   3    1.10    2.70
 -11  -6   3   -3.20    2.30
 -11   6   3   -6.10    4.60
 -10  -6   3    0.90    2.20
 -10  -6   3    2.00    2.10
  10  -6  -3    6.20    5.70
 -10   6   3   -5.10    4.30
   9  -6  -3   -8.90    3.20
  -9  -6   3    0.70    1.60
  -9  -6   3    2.00    1.70
  -9   6   3    3.00    4.10
  -9   6   3    0.00    4.40
  -9   6   3   -3.00    4.00
   8  -6  -3    6.10    5.00
  -8  -6   3   -0.70    3.90
  -8   6   3    8.70    4.50
  -8   6   3   13.40    5.20
  -8   6   3   -4.00    3.60
   7  -6  -3  356.96   20.70
   7  -6  -3  364.26   20.20
  -7  -6   3  381.96   21.80
  -7   6   3  352.36   20.30
  -7   6   3  416.56   20.80
  -7   6   3  347.07   18.50
   6  -6  -3   10.70    4.90
  -6  -6   3    8.40    4.80
   6  -6  -3    1.30    4.00
  -6   6   3    7.00    3.70
  -6   6   3    4.30    3.40
  -6   6   3    6.10    3.90
  -6   6   3    7.40    3.80
   5  -6  -3    6.40    4.20
  -5  -6   3    9.90    4.50
   5  -6  -3    8.90    4.20
  -5   6   3    5.80    2.90
  -5   6   3    3.30    3.90
  -5   6   3    8.70    3.90
  -5   6   3    3.80    3.60
  -4  -6   3    1.60    1.20
  -4  -6   3    2.10    1.10
   4  -6  -3    1.50    3.40
   4  -6  -3    7.90    4.30
  -4  -6   3    5.40    3.60
  -4   6   3    0.20    2.80
  -4   6   3    5.50    3.50
  -4   6   3    0.90    3.00
  -3  -6   3   68.29    3.30
  -3  -6   3   69.59    4.40
   3  -6  -3   87.99    9.00
  -3  -6   3   73.19    3.40
   3  -6  -3   99.79    9.60
   3   6  -3   69.09    6.80
  -3   6   3   54.79    6.50
  -3   6   3  101.79    9.40
  -3   6   3   67.09    7.30
   2  -6  -3  117.39    8.80
   2  -6  -3   96.39    9.10
  -2  -6   3   93.29    5.30
  -2  -6   3   98.19    5.40
  -2  -6   3  109.39    6.60
  -2  -6   3   94.29    6.00
  -2   6   3   94.69    8.90
   2   6  -3   97.99    6.90
   2   6  -3  110.29    6.00
  -2   6   3   70.99    7.50
   2   6  -3   97.39    5.70
  -1  -6   3  132.19    8.00
  -1  -6   3  130.89    7.10
   1  -6  -3  137.99    8.70
   1  -6  -3  113.99    8.90
   1  -6  -3  135.79    9.20
  -1  -6   3  118.59    7.10
  -1   6   3  140.29    9.00
   1   6  -3  136.59    7.60
  -1   6   3  146.59    9.40
   1   6  -3  131.79    8.00
   1   6  -3  128.79    7.60
   0  -6   3  171.08    9.50
   0  -6   3  190.48   10.00
   0  -6  -3  192.58   10.20
   0  -6  -3  194.98   11.20
   0  -6  -3  162.58   10.30
   0  -6   3  190.28   10.50
   0   6   3  177.28   10.30
   0   6  -3  171.88    9.90
   0   6  -3  184.68    9.90
   0   6   3  184.88   10.60
   0   6  -3  181.18    9.80
  -1  -6  -3  220.38    9.00
  -1  -6  -3  224.48   11.40
   1  -6   3  238.38   12.70
  -1  -6  -3  215.78   11.80
   1  -6   3  214.28   11.60
   1  -6   3  250.07   11.90
  -1  -6  -3  230.88   11.40
  -1  -6  -3  217.18   12.20
   1  -6   3  232.78   12.40
  -1  -6  -3  232.18   11.60
  -1   6  -3  221.88   11.70
  -1   6  -3  243.98   12.20
  -1   6  -3  213.78   12.00
   1   6   3  241.48   11.90
   1   6   3  246.08   12.20
   2  -6   3   15.10    3.70
  -2  -6  -3   20.20    3.30
  -2  -6  -3   24.50    3.90
   2  -6   3   24.00    5.00
  -2  -6  -3   21.30    4.00
  -2  -6  -3   19.20    4.30
   2  -6   3   19.70    4.40
  -2  -6  -3   19.50    3.50
  -2  -6  -3   21.50    4.40
  -2   6  -3   27.30    5.00
   2   6   3   21.30    3.90
   2   6   3   18.80    3.80
  -2   6  -3   24.20    4.90
  -2   6  -3   10.60    3.60
  -3  -6  -3  124.79    8.10
  -3  -6  -3  135.19    8.10
  -3  -6  -3  131.49    8.90
  -3  -6  -3  116.49    8.80
   3  -6   3  135.49   10.30
  -3  -6  -3  146.09    8.40
  -3   6  -3  123.59    9.40
  -3   6  -3  144.99   10.00
   3   6   3  131.59    8.40
  -3   6  -3  149.99   10.00
   3   6   3  126.99    8.40
   4  -6   3   10.30    4.00
  -4  -6  -3   -1.10    2.40
  -4  -6  -3    5.40    3.20
   4  -6   3   13.00    4.70
  -4  -6  -3    5.40    2.50
  -4  -6  -3    5.10    2.40
  -4  -6  -3   16.20    4.80
  -4  -6  -3    5.60    3.10
  -4   6  -3   13.60    4.70
   4   6   3    9.10    3.10
  -4   6  -3    2.70    2.80
  -4   6  -3    8.20    3.80
   4   6   3   15.70    3.50
  -4   6  -3   10.50    4.20
  -5  -6  -3    3.60    1.50
  -5  -6  -3    6.90    3.00
  -5  -6  -3    5.60    3.60
   5  -6   3   -1.80    3.00
  -5  -6  -3    0.90    2.20
  -5  -6  -3    7.10    3.40
  -5  -6  -3    2.40    3.30
   5  -6   3    6.00    4.40
  -5  -6  -3    4.50    2.50
  -5   6  -3    7.10    3.60
   5   6   3    4.00    2.50
   5   6   3    0.20    2.40
  -5   6  -3    4.20    4.00
  -5   6  -3   -0.40    3.00
  -5   6  -3    4.70    4.10
  -6  -6  -3   -3.50    3.10
  -6  -6  -3    6.10    4.00
  -6  -6  -3    8.90    4.40
  -6  -6  -3   -0.10    2.60
   6  -6   3    8.50    4.80
  -6  -6  -3    0.20    2.10
  -6  -6  -3    6.90    2.80
   6  -6   3   -1.50    4.00
  -6   6  -3    0.40    3.30
  -6   6  -3    4.40    4.20
  -6   6  -3    2.80    4.00
   6   6   3    2.80    2.80
  -6   6  -3    6.30    4.10
  -6   6  -3    0.80    3.00
  -7  -6  -3   89.39    8.50
   7  -6   3   67.69   10.30
   7  -6   3   97.99   12.10
  -7  -6  -3   78.59    8.20
  -7  -6  -3   82.19   10.50
  -7  -6  -3   74.69    8.10
   7   6   3   86.39    9.00
  -7   6  -3   84.29   11.00
  -7   6  -3   75.89    9.80
  -7   6  -3   60.19   10.00
  -8  -6  -3   26.00    5.10
  -8  -6  -3   22.50    7.40
  -8  -6  -3   21.00    5.10
   8  -6   3   19.80    7.00
  -8  -6  -3   24.70    5.00
   8  -6   3   20.40    6.70
  -8   6  -3   18.10    5.70
  -8   6  -3   16.10    5.80
  -8   6  -3   29.10    7.60
  -9  -6  -3    6.20    3.90
   9  -6   3   19.90    7.90
  -9  -6  -3   13.10    4.60
  -9  -6  -3   13.20    4.40
  -9   6  -3    7.80    6.20
  -9   6  -3   13.70    6.10
  -9   6  -3   11.60    5.00
 -10  -6  -3    8.00    4.60
 -10  -6  -3    7.40    4.40
  10  -6   3   -0.40    5.40
 -10  -6  -3    1.60    3.60
 -10   6  -3   -4.90    5.30
 -10   6  -3   -1.70    4.20
 -10   6  -3    4.60    5.50
 -11  -6  -3   34.70    7.30
 -11  -6  -3   22.40    6.50
  11  -6   3   17.30    8.30
 -11   6  -3   36.50   10.00
 -11   6  -3   20.10    9.10
 -12  -6  -3    1.50    4.10
  12  -6   3    6.50    6.20
 -12  -6  -3   -3.50    4.30
 -12   6  -3    7.70    8.00
 -12   6  -3   -4.00    6.30
  12  -7  -3   -3.90    6.70
 -12  -7   3    1.70    3.30
 -12   7   3    4.50    6.00
 -11  -7   3   46.80    5.70
  11  -7  -3   43.70   10.50
 -11  -7   3   55.19    6.10
 -11   7   3   75.09   13.00
 -10  -7   3   98.09    6.40
 -10  -7   3  101.59    6.50
  10  -7  -3  114.19   14.40
 -10   7   3   66.79   10.00
 -10   7   3   96.49   13.40
  -9  -7   3   19.60    2.60
   9  -7  -3   20.90    7.40
  -9   7   3   25.00    6.30
  -9   7   3   35.30    8.30
  -8  -7   3   99.99   13.20
   8  -7  -3   85.69   11.80
  -8   7   3   85.29   10.20
  -8   7   3   71.49   10.50
   7  -7  -3   31.30    7.30
   7  -7  -3   34.90    8.10
  -7  -7   3   35.50    8.00
  -7   7   3   40.60    8.00
  -7   7   3   36.90    7.40
  -7   7   3   51.39    8.10
   6  -7  -3    8.60    4.70
   6  -7  -3   19.30    6.00
  -6  -7   3    6.90    4.40
  -6   7   3   12.70    4.90
  -6   7   3    7.80    4.20
  -6   7   3   10.70    4.80
   5  -7  -3    8.80    4.10
  -5  -7   3    3.50    4.20
   5  -7  -3    4.60    3.90
  -5   7   3    8.30    4.40
  -5   7   3    7.70    4.00
  -5   7   3   11.40    4.40
   4  -7  -3   86.19   10.20
  -4  -7   3   96.69   10.40
  -4  -7   3  110.39    5.50
   4  -7  -3  115.29   11.40
  -4  -7   3  105.49    5.30
   4   7  -3   98.39    4.90
  -4   7   3   99.29    9.60
   4   7  -3   87.49    8.40
  -4   7   3   88.29    9.90
  -4   7   3  104.89    9.80
   3  -7  -3  248.28   14.30
  -3  -7   3  223.58    9.10
  -3  -7   3  216.78    9.00
   3  -7  -3  215.68   13.80
  -3  -7   3  226.68   10.00
  -3   7   3  233.08   13.60
  -3   7   3  206.98   12.60
  -3   7   3  198.58   12.60
   3   7  -3  235.48   11.60
   3   7  -3  216.88    9.60
   2  -7  -3  223.68   13.20
  -2  -7   3  230.28   11.00
  -2  -7   3  212.48    9.80
   2  -7  -3  214.08   12.30
   2  -7  -3  194.08   12.80
  -2  -7   3  206.18   10.40
   2   7  -3  217.28   10.10
   2   7  -3  213.28   10.00
  -2   7   3  221.28   12.60
  -2   7   3  220.38   12.80
   2   7  -3  221.28   11.00
   1  -7  -3   22.80    4.80
  -1  -7   3   34.80    4.20
   1  -7  -3   42.20    5.40
  -1  -7   3   38.70    4.60
  -1  -7   3   37.20    5.20
   1  -7  -3   38.60    6.30
  -1   7   3   36.00    5.60
   1   7  -3   42.40    5.30
   1   7  -3   46.10    5.10
  -1   7   3   31.00    5.40
   1   7  -3   36.30    4.70
   0  -7  -3  240.38   13.10
   0  -7   3  230.08   11.50
   0  -7   3  223.88   11.70
   0  -7  -3  210.78   12.00
   0  -7   3  219.08   11.40
   0  -7  -3  210.58   12.20
   0  -7   3  215.78   12.10
   0  -7  -3  221.48   11.80
   0   7  -3  213.38   11.40
   0   7  -3  231.38   11.70
   0   7   3  235.68   12.30
   0   7   3  225.58   12.30
   0   7  -3  220.98   11.60
   1  -7   3  529.65   23.40
  -1  -7  -3  559.54   24.10
  -1  -7  -3  568.04   23.20
   1  -7   3  575.84   23.20
  -1  -7  -3  540.55   22.50
  -1  -7  -3  580.84   22.30
   1  -7   3  618.44   23.50
  -1  -7  -3  518.45   22.90
   1  -7   3  592.34   24.60
   1   7   3  561.94   23.20
  -1   7  -3  567.24   22.80
   1   7   3  568.04   23.50
  -1   7  -3  551.24   23.60
  -1   7  -3  554.14   23.40
  -2  -7  -3    2.70    2.90
  -2  -7  -3    3.10    2.40
  -2  -7  -3    4.90    2.70
  -2  -7  -3   -0.20    2.30
   2  -7   3    1.20    3.30
   2  -7   3    7.70    4.00
   2  -7   3    3.70    3.10
  -2  -7  -3    0.50    2.60
   2   7   3    3.40    2.60
   2   7   3    1.90    2.50
  -2   7  -3    4.10    3.30
  -2   7  -3    0.60    2.90
  -2   7  -3    1.80    2.90
  -3  -7  -3  249.97   12.30
  -3  -7  -3  254.87   13.40
   3  -7   3  263.17   14.00
   3  -7   3  220.18   14.10
  -3  -7  -3  253.87   12.50
  -3  -7  -3  246.58   13.10
   3  -7   3  244.78   14.60
   3   7   3  236.98   12.50
  -3   7  -3  258.37   14.30
  -3   7  -3  217.58   13.50
   3   7   3  248.48   12.60
  -3   7  -3  231.98   14.30
  -4  -7  -3  173.18   10.60
  -4  -7  -3  134.09    9.70
  -4  -7  -3  183.58   10.20
  -4  -7  -3  155.18   10.80
   4  -7   3  170.48   12.80
  -4  -7  -3  164.28   10.70
   4  -7   3  191.18   13.00
  -4  -7  -3  155.98    9.50
  -4   7  -3  153.48   11.20
   4   7   3  170.08   10.00
  -4   7  -3  165.68   11.70
  -4   7  -3  184.28   11.70
  -4   7  -3  189.28   13.00
   4   7   3  171.28    9.90
  -5  -7  -3  182.38   10.30
  -5  -7  -3  161.68    9.90
  -5  -7  -3  157.78   10.30
   5  -7   3  158.38   14.60
   5  -7   3  172.28   12.90
  -5  -7  -3  172.98   11.30
  -5  -7  -3  170.78   11.20
  -5  -7  -3  160.18   11.60
  -5   7  -3  162.48   12.00
  -5   7  -3  159.88   14.70
   5   7   3  170.18   10.10
  -5   7  -3  134.39   13.00
  -6  -7  -3   11.70    3.90
   6  -7   3    6.30    5.30
  -6  -7  -3   13.10    4.80
  -6  -7  -3   10.70    3.60
   6  -7   3    1.50    4.90
  -6  -7  -3    5.20    3.90
  -6  -7  -3   17.60    4.00
  -6   7  -3    2.60    3.80
  -6   7  -3   11.20    5.60
  -6   7  -3   17.50    5.70
   6   7   3   14.80    4.20
  -6   7  -3   13.90    5.50
  -7  -7  -3  175.38   10.70
   7  -7   3  133.19   14.60
   7  -7   3  144.49   14.90
  -7  -7  -3  165.58   10.80
  -7  -7  -3  149.99   10.70
  -7   7  -3  155.78   15.50
  -7   7  -3  177.08   13.40
  -7   7  -3  168.68   15.90
   8  -7   3   19.50    7.40
  -8  -7  -3   30.30    5.60
  -8  -7  -3   21.00    4.80
  -8  -7  -3   34.10    6.20
  -8   7  -3   26.00    7.80
  -8   7  -3   33.80    7.90
  -8   7  -3   24.00    7.10
  -9  -7  -3    5.90    4.10
  -9  -7  -3    6.90    3.90
  -9  -7  -3    4.90    4.20
   9  -7   3    2.70    5.00
  -9   7  -3    1.90    4.80
  -9   7  -3   14.80    6.90
  -9   7  -3    1.80    5.00
 -10  -7  -3   -1.30    3.40
 -10  -7  -3   -2.20    3.70
 -10  -7  -3    3.60    3.70
  10  -7   3    4.30    5.90
 -10   7  -3    4.40    6.40
 -10   7  -3   -1.70    5.80
 -10   7  -3    4.10    5.30
  11  -7   3    7.20    7.10
 -11  -7  -3   17.50    5.80
 -11  -7  -3   19.70    5.60
 -11   7  -3   11.20    7.40
 -11   7  -3   20.50    9.20
 -12  -7  -3    5.40    5.00
  12  -7   3   -7.50    7.10
 -12   7  -3    3.80    7.80
 -12   7  -3   -3.30    7.50
 -12  -8   3   40.60    6.00
  12  -8  -3   33.50   10.80
 -12  -8   3   40.00    5.80
 -12   8   3   49.00   12.20
  11  -8  -3   32.30    9.80
 -11  -8   3   30.80    4.50
 -11   8   3   29.20    9.70
 -10  -8   3   -1.50    1.70
  10  -8  -3   -3.90    5.80
 -10   8   3    0.90    4.40
 -10   8   3   -2.30    5.50
   9  -8  -3   71.19   12.00
  -9  -8   3   86.09   13.40
  -9   8   3  104.29   11.90
  -9   8   3   94.79   13.30
  -8  -8   3   26.60    7.60
   8  -8  -3   12.40    6.00
  -8   8   3   35.10    7.30
  -8   8   3   28.50    7.40
   7  -8  -3   16.80    6.40
  -7  -8   3    7.10    6.10
   7  -8  -3   13.60    6.00
  -7   8   3    8.40    5.10
  -7   8   3   19.60    6.60
  -6  -8   3   29.60    7.20
   6  -8  -3   19.20    6.60
   6  -8  -3   17.70    6.00
  -6   8   3   28.60    6.90
  -6   8   3   34.80    6.70
   5  -8  -3   55.69    8.70
  -5  -8   3   77.59   10.80
   5  -8  -3   71.39   10.00
  -5   8   3   63.09    8.80
  -5   8   3   76.69    9.90
  -5   8   3   72.19    8.90
   5   8  -3   74.89    8.30
  -4  -8   3  352.26   13.10
  -4  -8   3  370.16   13.20
  -4  -8   3  346.57   14.20
  -4  -8   3  355.66   14.10
   4  -8  -3  342.67   19.20
   4  -8  -3  321.57   18.90
   4   8  -3  355.36   16.30
  -4   8   3  379.86   19.40
  -4   8   3  333.97   18.30
  -4   8   3  342.67   18.40
   4   8  -3  345.97   13.70
   3  -8  -3   -2.20    3.20
   3  -8  -3   -1.50    3.50
  -3  -8   3    2.90    1.70
  -3  -8   3   -0.10    1.70
   3   8  -3    2.20    1.90
  -3   8   3    1.00    3.00
   3   8  -3    1.70    2.20
  -3   8   3    8.20    4.10
  -3   8   3   -2.00    3.00
   2  -8  -3   64.89    8.60
  -2  -8   3   73.59    4.00
   2  -8  -3   70.59    7.50
  -2  -8   3   71.69    5.50
  -2  -8   3   74.79    5.40
   2  -8  -3   76.49    8.80
   2   8  -3   77.69    7.40
  -2   8   3   80.89    9.10
   2   8  -3   63.49    6.10
   2   8  -3   70.19    5.70
  -2   8   3   72.39    8.10
   1  -8  -3  465.75   22.30
  -1  -8   3  467.85   19.50
   1  -8  -3  481.75   21.10
  -1  -8   3  486.65   19.60
  -1  -8   3  478.15   19.10
  -1  -8   3  469.85   20.60
   1  -8  -3  489.75   22.10
  -1   8   3  500.85   21.70
   1   8  -3  481.55   19.80
   1   8  -3  480.25   19.70
  -1   8   3  440.06   21.50
   1   8  -3  465.75   19.80
   0  -8   3   14.90    3.70
   0  -8  -3    8.90    3.00
   0  -8  -3    9.70    3.40
   0  -8  -3    8.80    3.60
   0  -8  -3   17.30    5.00
   0  -8   3   14.60    3.40
   0  -8   3    9.60    4.00
   0  -8   3   10.60    3.10
   0   8   3   16.80    4.20
   0   8   3    8.80    3.70
   0   8  -3   21.00    4.40
   0   8  -3    5.80    2.90
   0   8  -3    9.80    3.50
   1  -8   3   35.30    6.10
  -1  -8  -3   25.20    4.50
  -1  -8  -3   31.00    5.20
  -1  -8  -3   35.90    5.50
  -1  -8  -3   30.30    5.40
  -1  -8  -3   20.90    4.60
   1  -8   3   22.70    4.10
   1  -8   3   30.50    5.70
   1  -8   3   23.80    4.30
   1   8   3   32.50    5.40
  -1   8  -3   38.70    5.90
  -1   8  -3   22.10    4.70
   1   8   3   28.00    5.00
  -1   8  -3   32.00    5.20
  -2  -8  -3  256.57   13.30
   2  -8   3  245.18   14.60
  -2  -8  -3  262.97   13.00
  -2  -8  -3  243.08   12.80
   2  -8   3  263.77   14.20
  -2  -8  -3  231.68   12.80
   2  -8   3  248.28   15.00
  -2  -8  -3  255.47   14.00
   2   8   3  261.67   13.40
  -2   8  -3  272.37   14.90
   2   8   3  258.37   13.50
  -2   8  -3  266.97   14.00
  -2   8  -3  248.48   14.30
  -3  -8  -3  247.48   12.00
  -3  -8  -3  203.58   12.30
  -3  -8  -3  193.28   11.30
   3  -8   3  214.48   13.10
   3  -8   3  212.28   13.80
  -3  -8  -3  200.98   10.50
  -3  -8  -3  189.88   11.70
   3  -8   3  183.38   13.20
  -3   8  -3  204.38   13.50
  -3   8  -3  194.88   12.60
   3   8   3  207.98   11.60
  -3   8  -3  196.98   12.90
   3   8   3  198.28   11.50
   4  -8   3   -0.20    3.80
  -4  -8  -3   -1.60    2.40
   4  -8   3   -4.00    3.50
  -4  -8  -3   -1.90    2.40
  -4  -8  -3    0.20    3.00
  -4  -8  -3    2.00    2.40
  -4  -8  -3    3.10    2.20
  -4   8  -3    4.00    3.90
  -4   8  -3   -0.90    3.40
  -4   8  -3   -2.00    3.00
   4   8   3   -0.10    2.60
   4   8   3    0.60    2.50
  -5  -8  -3   66.19    8.80
  -5  -8  -3   86.19    9.60
   5  -8   3   76.49   10.80
  -5  -8  -3   83.59    7.80
  -5  -8  -3   79.79    8.60
   5  -8   3   73.89   10.60
  -5  -8  -3   77.89    8.10
  -5   8  -3   63.89    9.50
  -5   8  -3   84.39   10.00
   5   8   3   80.89    8.30
  -5   8  -3   74.99    9.70
  -6  -8  -3    8.30    4.70
  -6  -8  -3    9.50    3.50
  -6  -8  -3   10.20    3.90
   6  -8   3   28.90    7.10
  -6  -8  -3   12.40    3.90
  -6  -8  -3   13.60    5.20
   6  -8   3    7.50    5.70
  -6   8  -3    9.40    5.10
   6   8   3   10.20    3.90
  -6   8  -3   10.70    5.30
  -6   8  -3   12.30    5.00
  -6   8  -3   18.70    6.10
   7  -8   3   36.60    8.50
  -7  -8  -3   21.10    6.10
  -7  -8  -3   35.30    5.70
  -7  -8  -3   35.40    5.90
  -7  -8  -3   39.20    6.30
  -7   8  -3   22.50    7.00
  -7   8  -3   21.50    7.40
  -7   8  -3   24.70    6.60
  -8  -8  -3   -3.90    2.70
  -8  -8  -3   -0.70    2.60
  -8  -8  -3    0.40    3.10
   8  -8   3    8.80    6.10
  -8   8  -3    2.90    5.20
  -8   8  -3    1.30    4.90
  -8   8  -3    2.20    4.90
   9  -8   3   41.70   10.60
  -9  -8  -3   44.20    7.00
  -9  -8  -3   46.90    7.70
  -9  -8  -3   37.00    6.40
  -9   8  -3   47.50   10.30
  -9   8  -3   43.50    9.90
  -9   8  -3   37.30    8.60
 -10  -8  -3   47.90    7.70
  10  -8   3   20.00    8.90
 -10  -8  -3   49.20    7.60
 -10  -8  -3   33.40    7.00
 -10   8  -3   36.10   10.00
 -10   8  -3   45.90   10.10
 -10   8  -3   36.80    8.60
 -11  -8  -3    2.90    4.30
  11  -8   3   -4.00    6.50
 -11  -8  -3   -6.50    3.90
 -11   8  -3   -9.50    5.50
 -11   8  -3    9.60    7.70
 -11   8  -3   -3.70    5.40
 -12  -8  -3    1.90    4.70
  12  -8   3    3.00    7.10
 -12   8  -3   -1.60    6.90
 -12   8  -3    1.60    7.50
 -12  -9   3    3.50    3.20
  12  -9  -3    6.30    7.20
 -12  -9   3    2.50    3.20
 -12   9   3   -3.90    6.50
  11  -9  -3   -2.20    5.30
 -11  -9   3    0.50    2.20
 -11  -9   3    0.70    2.70
 -11   9   3    9.00    6.80
 -10  -9   3   11.00    2.70
  10  -9  -3   12.00    7.00
 -10  -9   3   11.70    2.80
 -10   9   3   16.30    7.60
 -10   9   3   12.70    5.90
   9  -9  -3   23.40    8.50
  -9  -9   3   35.60   10.40
  -9   9   3   22.40    8.10
  -9   9   3   23.50    7.20
  -8  -9   3   18.60    7.50
   8  -9  -3   34.50    8.60
  -8   9   3   44.20    8.50
  -8   9   3   36.60    8.90
  -7  -9   3   -0.50    4.70
   7  -9  -3    0.70    4.20
   7  -9  -3    2.10    4.60
  -7   9   3   -3.90    4.10
  -7   9   3   -1.70    4.00
   6  -9  -3   24.90    7.00
  -6  -9   3   26.90    7.40
   6  -9  -3   22.20    6.70
  -6   9   3   18.40    6.00
  -6   9   3   36.40    8.20
   6   9  -3   25.50    5.40
  -5  -9   3   79.29   10.80
  -5  -9   3   89.79    5.20
   5  -9  -3   73.29   10.30
  -5  -9   3   82.19    4.70
  -5  -9   3   85.19    5.30
   5  -9  -3   78.39   10.10
  -5   9   3   76.59   10.00
  -5   9   3   89.59   11.40
   5   9  -3   99.19    9.20
   4  -9  -3  164.78   15.10
  -4  -9   3  154.98    8.00
  -4  -9   3  155.18    8.50
  -4  -9   3  176.28    9.00
   4  -9  -3  170.58   13.30
  -4   9   3  173.58   12.70
   4   9  -3  166.28   10.00
  -4   9   3  169.78   12.50
   4   9  -3  163.48    8.40
  -3  -9   3    4.80    2.50
   3  -9  -3   17.00    5.00
  -3  -9   3    6.80    2.50
  -3  -9   3    4.90    2.50
   3  -9  -3    3.80    4.00
  -3   9   3   10.50    4.70
   3   9  -3   11.30    2.80
   3   9  -3    7.30    3.10
   3   9  -3   10.00    3.00
  -3   9   3   10.30    4.80
   2  -9  -3    3.40    3.90
   2  -9  -3   12.60    3.90
  -2  -9   3   11.20    3.00
   2  -9  -3    4.60    4.30
  -2  -9   3    9.30    2.10
  -2  -9   3    3.70    2.00
   2   9  -3    4.30    2.60
  -2   9   3    6.40    4.40
   2   9  -3    5.00    2.90
  -2   9   3   12.60    4.60
   2   9  -3    5.40    2.90
   1  -9  -3   50.89    7.90
  -1  -9   3   42.70    5.40
  -1  -9   3   57.59    6.30
  -1  -9   3   55.09    5.90
   1  -9  -3   43.90    7.10
   1  -9  -3   60.59    7.50
   1   9  -3   53.69    6.40
   1   9  -3   63.49    6.80
  -1   9   3   46.70    6.90
  -1   9   3   54.19    7.50
   1   9  -3   50.89    6.20
   0  -9   3   39.50    5.80
   0  -9  -3   46.50    6.50
   0  -9  -3   55.69    7.40
   0  -9  -3   59.39    7.70
   0  -9   3   53.39    6.30
   0  -9   3   57.79    6.70
   0  -9  -3   53.79    7.70
   0   9  -3   42.80    6.20
   0   9  -3   56.89    6.50
   0   9  -3   52.59    6.70
   0   9   3   62.29    7.80
   0   9   3   64.69    8.10
  -1  -9  -3    0.70    3.20
  -1  -9  -3    6.20    3.00
  -1  -9  -3    4.70    3.00
   1  -9   3    0.00    2.70
   1  -9   3    5.70    2.80
   1  -9   3    3.20    4.00
   1  -9   3   11.30    4.10
  -1  -9  -3    8.50    3.60
  -1  -9  -3    5.50    3.50
   1   9   3   10.30    3.90
  -1   9  -3    7.20    3.70
  -1   9  -3    5.70    3.70
  -1   9  -3    5.20    3.40
   1   9   3    9.90    3.80
   2  -9   3   71.79    8.60
  -2  -9  -3   96.39    8.60
  -2  -9  -3   78.69    8.90
  -2  -9  -3   81.59    8.20
  -2  -9  -3   67.29    7.50
   2  -9   3   78.09    9.60
  -2  -9  -3   82.09    8.40
   2  -9   3   73.69    9.20
   2   9   3   79.79    8.40
  -2   9  -3   98.89   10.30
   2   9   3   69.09    7.80
  -2   9  -3   67.89    8.00
  -2   9  -3   65.89    8.30
  -3  -9  -3   29.70    5.50
  -3  -9  -3   37.90    5.80
   3  -9   3   39.50    7.70
  -3  -9  -3   39.00    5.20
  -3  -9  -3   31.50    5.20
  -3  -9  -3   29.00    5.70
   3  -9   3   25.80    5.40
   3  -9   3   25.10    6.50
   3   9   3   38.10    5.70
  -3   9  -3   38.40    7.20
  -3   9  -3   31.50    6.20
  -3   9  -3   31.70    6.40
   3   9   3   35.70    5.80
  -4  -9  -3   10.70    3.40
   4  -9   3    0.80    4.00
  -4  -9  -3   12.10    3.70
   4  -9   3    5.70    4.80
  -4  -9  -3    7.40    3.90
  -4  -9  -3    9.30    4.30
   4   9   3    0.90    3.10
  -4   9  -3    6.40    4.80
  -4   9  -3    7.30    4.40
  -4   9  -3   12.10    5.20
  -5  -9  -3   68.79    8.10
  -5  -9  -3   70.69    9.20
  -5  -9  -3   81.99    7.90
  -5  -9  -3   69.79    7.80
   5  -9   3   63.09   10.40
  -5  -9  -3   84.39    9.70
   5  -9   3   64.49   10.30
   5   9   3   70.59    7.80
  -5   9  -3   53.99    8.70
  -5   9  -3   76.59   10.70
  -5   9  -3   51.29    8.60
   6  -9   3    6.90    5.90
  -6  -9  -3    1.80    3.00
  -6  -9  -3    6.30    3.30
  -6  -9  -3    3.80    4.90
  -6  -9  -3    5.10    3.10
  -6  -9  -3    4.10    4.20
  -6   9  -3    5.70    4.70
   6   9   3    1.40    2.90
  -6   9  -3    2.00    4.50
  -6   9  -3    5.00    5.00
  -6   9  -3    0.30    3.90
  -7  -9  -3    1.80    3.20
   7  -9   3   -1.40    5.20
  -7  -9  -3    5.10    3.60
  -7  -9  -3   -0.90    2.60
  -7  -9  -3    1.00    4.60
  -7   9  -3   -4.50    3.90
  -7   9  -3   -6.80    3.80
  -7   9  -3    4.30    5.60
  -8  -9  -3   65.19    8.10
  -8  -9  -3   53.19    7.60
  -8  -9  -3   61.69    8.00
   8  -9   3   54.59   11.40
  -8  -9  -3   73.49   11.20
  -8   9  -3   75.39   11.60
  -8   9  -3   56.29   10.30
  -8   9  -3   78.69   11.70
  -9  -9  -3   19.20    5.10
  -9  -9  -3    8.10    4.30
   9  -9   3   17.10    7.80
  -9  -9  -3    9.30    4.60
  -9   9  -3   12.10    6.70
  -9   9  -3   11.50    7.20
  -9   9  -3   17.20    7.30
 -10  -9  -3    0.10    3.70
 -10  -9  -3    3.70    3.90
  10  -9   3    8.20    7.00
 -10  -9  -3    0.40    3.30
 -10   9  -3    3.00    6.20
 -10   9  -3    6.00    6.20
 -10   9  -3    2.60    7.00
  11  -9   3   -4.60    5.70
 -11  -9  -3    0.90    4.20
 -11   9  -3    0.20    6.50
 -11   9  -3    5.70    7.10
 -11   9  -3    0.30    6.20
  12  -9   3    8.00    8.40
 -12  -9  -3   -0.40    4.50
 -12   9  -3   -3.90    6.20
 -12   9  -3    3.80    8.00
 -12 -10   3   23.00    4.50
  12 -10  -3   16.10    9.30
 -12 -10   3   26.80    4.70
 -12  10   3   25.90   10.80
 -11 -10   3   21.00    3.80
  11 -10  -3   30.10    9.40
 -11 -10   3   19.40    3.60
 -11  10   3   21.70    9.90
  10 -10  -3    9.30    7.00
 -10 -10   3   13.90    8.50
 -10 -10   3    8.90    2.60
 -10 -10   3   10.50    2.50
 -10  10   3    6.70    7.40
 -10  10   3   -0.20    4.90
   9 -10  -3    3.00    5.50
  -9 -10   3   -0.90    5.50
  -9 -10   3    0.20    1.70
  -9  10   3   -3.70    5.10
  -9  10   3    0.50    4.70
   8 -10  -3   39.60    9.70
  -8 -10   3   39.50   10.00
  -8  10   3   28.20    9.00
  -8  10   3   24.50    7.70
   7 -10  -3    3.20    5.10
  -7 -10   3    4.00    5.10
   7 -10  -3    1.40    5.20
  -7  10   3    4.30    5.00
  -7  10   3   -2.70    4.50
  -6 -10   3   76.09    4.80
   6 -10  -3   61.79    9.70
  -6 -10   3   77.69   11.50
   6 -10  -3   96.19   13.30
  -6 -10   3   65.69    4.60
  -6  10   3   74.39   10.20
   6  10  -3   76.99    9.40
  -6  10   3   63.39   10.10
  -5 -10   3  102.89    6.20
  -5 -10   3  102.89   12.80
   5 -10  -3   84.99   11.40
  -5 -10   3  111.99    6.80
   5 -10  -3   75.29   10.90
  -5 -10   3  110.39    6.40
  -5  10   3   94.89   11.90
   5  10  -3  112.99    8.50
  -5  10   3  109.79   12.50
   4 -10  -3  163.68   15.70
  -4 -10   3  142.99    8.10
  -4 -10   3  146.09    8.10
   4 -10  -3  142.59   14.40
  -4 -10   3  144.29    8.80
  -4  10   3  117.29   12.60
   4  10  -3  132.99    8.30
  -4  10   3  145.49   13.50
   4  10  -3  140.89    9.30
   3 -10  -3  134.19   13.50
   3 -10  -3  140.49   13.90
  -3 -10   3  150.98    9.00
  -3 -10   3  163.08    9.10
  -3  10   3  158.98   12.30
  -3  10   3  153.48   12.10
   3  10  -3  145.09    9.30
   3  10  -3  159.38    9.30
  -2 -10   3    5.30    2.90
   2 -10  -3    9.90    4.80
   2 -10  -3    2.90    4.30
   2 -10  -3    4.00    3.10
  -2 -10   3    4.50    1.90
  -2 -10   3    1.90    2.40
   2  10  -3    2.60    2.70
   2  10  -3    0.90    2.60
  -2  10   3   12.00    4.90
  -2  10   3    4.20    4.10
   2  10  -3    0.70    2.50
   1 -10  -3   19.80    5.90
  -1 -10   3   20.70    4.50
  -1 -10   3   24.80    4.50
   1 -10  -3   21.30    4.70
   1 -10  -3   31.30    6.60
  -1 -10   3   22.00    4.40
   1  10  -3   30.30    5.00
   1  10  -3   28.70    5.10
   1  10  -3   23.40    4.70
  -1  10   3   25.80    5.90
  -1  10   3   24.90    5.90
   0 -10  -3   33.60    5.60
   0 -10  -3   30.20    5.50
   0 -10   3   44.50    6.10
   0 -10   3   38.10    5.60
   0 -10  -3   40.60    7.00
   0 -10   3   34.70    5.60
   0 -10  -3   55.49    7.90
   0  10  -3   44.70    6.60
   0  10   3   37.80    6.30
   0  10  -3   46.10    6.80
   0  10   3   45.00    6.90
   0  10  -3   39.10    5.90
  -1 -10  -3  107.39   10.10
  -1 -10  -3   85.29    9.80
   1 -10   3  104.99   10.00
  -1 -10  -3   79.89    8.60
  -1 -10  -3  114.69   10.30
   1 -10   3   95.89    9.80
   1 -10   3   93.99    9.70
  -1 -10  -3  110.89    8.20
  -1  10  -3  105.29    9.80
  -1  10  -3  104.79   10.70
   1  10   3  103.39   10.00
   1  10   3   98.39    9.70
  -1  10  -3  116.19   10.80
  -2 -10  -3  166.68   10.80
   2 -10   3  133.79   12.70
  -2 -10  -3  144.69    9.90
  -2 -10  -3  144.59    9.90
  -2 -10  -3  140.39   11.00
  -2 -10  -3  144.09   10.20
   2 -10   3  162.98   11.50
  -2  10  -3  134.39   12.50
   2  10   3  146.49   10.60
  -2  10  -3  134.99   10.30
   2  10   3  146.69   10.40
  -2  10  -3  145.09   11.40
   3 -10   3  273.57   17.10
  -3 -10  -3  259.27   15.30
  -3 -10  -3  270.17   14.30
  -3 -10  -3  247.68   14.00
  -3 -10  -3  276.57   14.80
  -3 -10  -3  274.27   13.30
  -3  10  -3  258.17   16.40
   3  10   3  259.47   14.50
  -3  10  -3  253.67   16.00
   3  10   3  252.07   14.40
  -3  10  -3  283.87   15.90
  -4 -10  -3   50.99    7.30
  -4 -10  -3   76.19    8.80
  -4 -10  -3   67.39    7.90
   4 -10   3   54.19    9.10
  -4 -10  -3   52.69    7.10
  -4  10  -3   87.89   10.90
  -4  10  -3   67.89    9.60
  -4  10  -3   80.99   10.10
   4  10   3   59.99    7.80
  -5 -10  -3   89.89    9.50
  -5 -10  -3   76.19    8.40
  -5 -10  -3  106.99   11.70
  -5 -10  -3   91.19   10.50
  -5 -10  -3   74.89    8.30
   5 -10   3   67.09   10.50
  -5  10  -3   57.99    9.80
  -5  10  -3   76.49   10.70
   5  10   3   76.99    8.90
  -5  10  -3   76.29   10.70
  -6 -10  -3   83.89    9.10
  -6 -10  -3  120.19   12.90
   6 -10   3  102.89   13.70
  -6 -10  -3  101.09   11.40
  -6 -10  -3  114.49   10.50
  -6 -10  -3  100.99    9.60
  -6  10  -3   74.49   10.90
  -6  10  -3   69.09   10.40
  -6  10  -3  106.09   14.00
  -6  10  -3  101.49   11.70
   7 -10   3   26.40    8.30
  -7 -10  -3   42.30    6.80
  -7 -10  -3   57.59   10.10
  -7 -10  -3   40.00    6.40
  -7 -10  -3   44.40    6.90
  -7  10  -3   36.60    8.40
  -7  10  -3   25.70    7.90
  -7  10  -3   32.40    8.90
  -8 -10  -3   -0.90    5.00
  -8 -10  -3   -0.10    3.10
   8 -10   3    3.30    5.90
  -8 -10  -3   -3.30    3.10
  -8 -10  -3   -1.60    2.80
  -8  10  -3    4.70    5.00
  -8  10  -3   -3.00    5.20
  -8  10  -3   -1.20    4.50
   9 -10   3   37.90   10.00
  -9 -10  -3   44.80    7.50
  -9 -10  -3   45.20    7.60
  -9 -10  -3   37.50    6.90
  -9  10  -3   44.70   10.10
  -9  10  -3   38.60   10.00
  -9  10  -3   47.00   10.60
 -10 -10  -3   11.70    4.80
 -10 -10  -3   23.90    5.80
 -10 -10  -3   24.10    6.10
  10 -10   3   10.10    8.40
 -10  10  -3   20.60    8.80
 -10  10  -3   18.90    9.10
 -10  10  -3   10.20    6.90
  11 -10   3   -5.10    7.60
 -11 -10  -3   -1.20    4.40
 -11  10  -3   -6.20    6.10
 -11  10  -3   -5.10    6.50
 -11  10  -3    9.50    6.90
 -11 -11   3   22.40    4.00
  11 -11  -3   15.80    8.80
 -11 -11   3   22.90    4.00
 -11  11   3    7.50    9.40
  10 -11  -3   31.80    9.60
 -10 -11   3   44.90   11.40
 -10 -11   3   35.70    4.30
 -10 -11   3   28.50    3.90
 -10  11   3   30.80    8.80
 -10  11   3   19.60    9.40
  -9 -11   3   26.30    3.50
  -9 -11   3   28.30    9.80
  -9 -11   3   25.30    3.50
   9 -11  -3   31.90    9.50
  -9  11   3   46.10   10.60
  -9  11   3   39.70    9.30
   8 -11  -3   -1.70    5.60
  -8 -11   3   -0.30    1.80
  -8 -11   3   -2.30    5.50
  -8 -11   3   -0.50    1.90
  -8  11   3   -3.60    4.50
  -8  11   3   -1.40    5.20
   7 -11  -3   48.70   10.20
   7 -11  -3   61.39   11.40
  -7 -11   3   61.09    4.80
  -7 -11   3   54.59    5.00
  -7 -11   3   60.39   11.20
  -7  11   3   65.69   12.00
  -7  11   3   47.80    9.40
   6 -11  -3  181.68   18.20
  -6 -11   3  176.18    9.20
  -6 -11   3  211.38   19.90
  -6 -11   3  187.78    8.80
  -6 -11   3  171.48    9.10
   6 -11  -3  160.98   17.30
  -6  11   3  195.48   15.20
  -6  11   3  178.18   18.10
   5 -11  -3    8.90    5.90
  -5 -11   3    8.10    2.70
   5 -11  -3   -5.10    4.30
  -5 -11   3   11.60    6.00
  -5 -11   3    9.60    3.00
  -5 -11   3    6.10    2.90
  -5  11   3    4.00    4.80
  -5  11   3   11.20    5.70
   4 -11  -3   46.80    9.50
   4 -11  -3   51.39    9.40
  -4 -11   3   49.40    5.70
  -4 -11   3   40.40    5.70
  -4 -11   3   32.80    5.00
  -4  11   3   39.60    7.90
   4  11  -3   43.70    6.00
  -4  11   3   59.89    9.70
   3 -11  -3   42.30    8.50
  -3 -11   3   47.80    6.10
   3 -11  -3   37.60    8.20
  -3 -11   3   41.80    5.80
   3  11  -3   52.99    6.20
  -3  11   3   43.20    7.60
   3  11  -3   47.90    6.20
  -3  11   3   39.50    7.90
  -2 -11   3   44.00    6.10
  -2 -11   3   46.40    4.70
   2 -11  -3   43.90    7.80
  -2 -11   3   43.10    6.10
   2 -11  -3   43.20    8.40
  -2  11   3   40.30    7.90
   2  11  -3   49.20    6.60
  -2  11   3   52.99    8.60
   2  11  -3   57.09    6.60
   1 -11  -3   13.00    4.70
   1 -11  -3   10.50    5.20
   1 -11  -3   12.40    5.40
  -1 -11   3    0.60    2.40
  -1 -11   3    6.20    3.20
  -1 -11   3   12.30    4.00
  -1  11   3    6.10    4.30
   1  11  -3    4.60    3.40
   1  11  -3    8.30    3.60
  -1  11   3    3.10    4.40
   1  11  -3    3.60    3.20
   0 -11  -3   73.19    8.60
   0 -11   3   74.19    8.40
   0 -11  -3   93.89   11.00
   0 -11  -3   80.29   10.10
   0 -11   3   82.09    9.10
   0 -11  -3   98.99   11.00
   0 -11   3   88.19    9.70
   0  11   3   86.99    9.70
   0  11  -3   71.39    8.70
   0  11  -3   75.79    8.30
   0  11  -3   89.09    9.80
   0  11   3   68.89    8.90
  -1 -11  -3  461.85   19.80
  -1 -11  -3  442.26   21.30
  -1 -11  -3  434.06   21.40
   1 -11   3  448.86   21.70
  -1 -11  -3  404.66   22.10
   1 -11   3  438.76   21.70
  -1 -11  -3  462.05   21.40
   1 -11   3  449.56   21.70
   1  11   3  452.85   21.80
  -1  11  -3  467.55   22.20
  -1  11  -3  424.66   20.20
  -1  11  -3  447.96   22.00
   1  11   3  426.66   21.40
   2 -11   3  124.69   11.50
   2 -11   3  113.79   12.20
  -2 -11  -3  124.29    9.20
  -2 -11  -3  143.59   11.30
  -2 -11  -3  126.49    9.60
  -2 -11  -3  136.59   10.30
  -2 -11  -3  129.09   10.10
  -2  11  -3  110.59   11.00
  -2  11  -3  151.68   13.90
   2  11   3  138.39   10.60
  -2  11  -3  122.79   12.30
   2  11   3  123.39   11.60
  -3 -11  -3    2.30    3.10
  -3 -11  -3   -1.00    2.40
  -3 -11  -3    0.10    3.40
  -3 -11  -3    1.90    2.50
  -3 -11  -3   -3.40    2.50
   3 -11   3    0.30    4.40
   3  11   3   -0.90    2.90
  -3  11  -3    3.90    4.10
  -3  11  -3   -0.10    3.40
  -3  11  -3    4.00    4.20
  -4 -11  -3   76.89    8.90
  -4 -11  -3   96.49   10.30
  -4 -11  -3   86.29    9.20
   4 -11   3   71.59   11.00
  -4 -11  -3   77.99    9.60
  -4  11  -3   71.59   10.50
  -4  11  -3   82.69   10.20
  -4  11  -3   56.69    9.80
   4  11   3   82.59    9.50
  -5 -11  -3   11.50    4.30
  -5 -11  -3   15.70    4.50
  -5 -11  -3    9.60    4.70
   5 -11   3   16.70    6.60
  -5 -11  -3   18.20    5.40
  -5 -11  -3   14.30    5.70
  -5  11  -3    7.60    4.90
  -5  11  -3    7.90    5.70
   5  11   3   20.10    5.30
  -5  11  -3   16.40    6.00
   6 -11   3    8.60    6.30
  -6 -11  -3    6.20    3.60
  -6 -11  -3   11.80    4.80
  -6 -11  -3    3.60    4.90
  -6 -11  -3   -1.90    2.70
  -6 -11  -3    3.00    4.20
  -6  11  -3    2.30    4.90
  -6  11  -3    3.70    4.70
  -6  11  -3    3.90    5.70
  -6  11  -3    3.40    5.80
   7 -11   3  105.09   14.40
  -7 -11  -3   94.49    9.90
  -7 -11  -3   94.29   10.40
  -7 -11  -3  137.19   15.40
  -7 -11  -3  111.89   11.00
  -7  11  -3   87.99   13.10
  -7  11  -3   87.09   11.80
  -7  11  -3  125.29   16.40
  -8 -11  -3   92.09   10.00
   8 -11   3  100.89   14.80
  -8 -11  -3   67.09    9.20
  -8 -11  -3   92.69   10.10
  -8 -11  -3   71.09   11.80
  -8  11  -3   75.79   11.70
  -8  11  -3   71.79   11.70
  -8  11  -3   85.19   14.00
  -9 -11  -3  106.59   10.60
  -9 -11  -3   79.79   10.30
  -9 -11  -3   86.79    9.90
   9 -11   3   94.69   16.00
  -9  11  -3  108.49   15.00
  -9  11  -3  119.29   16.60
  -9  11  -3  128.29   15.70
  10 -11   3   -8.40    6.60
 -10 -11  -3    3.10    4.30
 -10  11  -3   -5.90    5.80
 -10  11  -3    0.90    6.50
 -10  11  -3   -1.50    6.40
  11 -11   3    2.90    7.60
 -11 -11  -3    4.70    4.60
 -11  11  -3    1.30    7.10
 -11  11  -3   -5.30    6.70
 -11  11  -3    2.00    7.10
  11 -12  -3   -2.00    7.20
 -11 -12   3    4.60    2.90
 -11 -12   3    5.20    2.90
 -11  12   3    8.00    8.50
 -11  12   3   -2.90    6.10
 -10 -12   3   12.50    8.70
 -10 -12   3   10.40    3.10
  10 -12  -3   12.70    8.30
 -10 -12   3    9.00    2.90
 -10  12   3   12.90    7.80
 -10  12   3   -3.50    6.70
  -9 -12   3   16.70    3.40
  -9 -12   3   16.80    3.50
   9 -12  -3   15.50    8.10
  -9 -12   3    9.40    8.10
  -9  12   3    9.50    8.20
  -9  12   3   24.00    7.80
  -8 -12   3   28.20    4.00
   8 -12  -3   17.30    6.70
  -8 -12   3   17.90    8.00
  -8 -12   3   25.30    3.90
  -8  12   3   30.30    9.00
  -8  12   3   28.30    9.80
   7 -12  -3    6.00    6.40
  -7 -12   3   10.40    3.20
   7 -12  -3   12.20    7.20
  -7 -12   3    4.80    2.70
  -7 -12   3   11.20    7.60
  -7  12   3   15.20    6.40
  -7  12   3    2.20    5.80
  -6 -12   3    3.10    2.40
  -6 -12   3    5.40    2.70
  -6 -12   3    0.50    5.20
   6 -12  -3    3.80    5.20
  -6 -12   3    3.00    2.60
   6 -12  -3    5.90    5.70
  -6  12   3    0.60    4.60
  -6  12   3    4.10    4.70
  -5 -12   3   17.40    4.00
  -5 -12   3    7.50    2.90
   5 -12  -3    2.00    5.30
  -5 -12   3   10.60    3.70
   5 -12  -3   10.50    6.20
  -5  12   3    5.90    5.30
  -5  12   3    5.00    5.30
  -4 -12   3   29.40    5.20
   4 -12  -3   29.00    8.30
  -4 -12   3   42.50    5.90
   4 -12  -3   23.10    7.10
  -4 -12   3   45.90    6.10
  -4  12   3   53.09    9.40
  -4  12   3   44.60    9.00
  -3 -12   3   -1.00    2.60
   3 -12  -3    3.30    4.80
  -3 -12   3    1.20    2.80
   3 -12  -3    3.60    5.00
  -3 -12   3   -2.30    3.00
   3  12  -3    1.20    3.00
  -3  12   3    0.80    3.80
  -3  12   3   -4.50    3.60
  -2 -12   3    4.30    2.20
   2 -12  -3    1.40    4.50
  -2 -12   3    2.70    2.80
   2 -12  -3   -5.10    3.50
  -2 -12   3   -2.10    2.80
  -2  12   3    1.20    4.10
  -2  12   3   -0.40    3.80
   2  12  -3    3.10    3.10
   2  12  -3   -1.20    3.00
   1 -12  -3    6.10    4.10
  -1 -12   3    7.90    3.70
  -1 -12   3    6.10    3.80
  -1 -12   3    5.10    3.10
   1 -12  -3    5.80    4.70
   1 -12  -3   -6.40    3.60
   1  12  -3   10.60    4.00
  -1  12   3   -3.60    3.40
  -1  12   3   13.90    5.10
   1  12  -3    9.50    4.20
   0 -12  -3    1.50    3.40
   0 -12   3    3.60    3.00
   0 -12  -3    3.70    4.30
   0 -12  -3   -2.00    2.40
   0 -12   3    1.80    3.20
   0 -12   3    1.00    3.30
   0 -12  -3    2.50    3.60
   0  12   3   -2.80    3.10
   0  12  -3    9.80    4.50
   0  12   3   -2.50    3.40
   0  12  -3    1.00    3.60
   0  12  -3   -0.60    3.20
   1 -12   3   23.50    5.60
   1 -12   3   34.70    7.00
  -1 -12  -3   15.80    5.80
  -1 -12  -3   19.40    5.00
  -1 -12  -3   31.00    5.40
  -1 -12  -3   24.60    5.80
  -1  12  -3   24.70    6.30
   1  12   3   21.80    5.90
  -1  12  -3   25.70    5.70
   1  12   3   31.80    6.50
  -1  12  -3   16.10    5.60
  -2 -12  -3   -8.30    2.50
  -2 -12  -3   -0.60    2.80
  -2 -12  -3   -0.80    3.50
  -2 -12  -3   -0.50    2.40
   2 -12   3   -3.70    3.60
  -2 -12  -3    0.20    2.70
   2  12   3    4.20    3.90
  -2  12  -3   -5.40    3.10
  -2  12  -3   -5.20    3.30
  -2  12  -3   -0.60    3.10
  -3 -12  -3    8.60    4.00
  -3 -12  -3   -1.00    2.30
  -3 -12  -3    2.70    2.90
  -3 -12  -3    0.60    3.60
   3 -12   3   -3.40    3.80
  -3 -12  -3    2.40    2.60
   3  12   3   -4.90    3.10
  -3  12  -3    3.80    4.00
  -3  12  -3    0.80    4.20
  -3  12  -3    6.60    4.40
  -4 -12  -3    1.80    4.20
  -4 -12  -3   -0.50    2.90
   4 -12   3   13.00    6.00
  -4 -12  -3    2.50    3.60
  -4 -12  -3   -1.60    2.70
   4  12   3   10.90    4.90
  -4  12  -3    0.10    4.50
  -4  12  -3   -2.50    3.90
  -4  12  -3   -0.80    4.10
  -5 -12  -3   -3.90    3.50
  -5 -12  -3    3.40    3.80
  -5 -12  -3    0.70    3.20
  -5 -12  -3    1.00    4.40
  -5 -12  -3   -0.50    2.90
   5 -12   3   -3.70    4.70
  -5  12  -3    3.80    5.20
  -5  12  -3   -2.60    4.30
  -5  12  -3   -2.40    4.40
  -6 -12  -3    1.40    4.00
  -6 -12  -3    9.70    4.10
  -6 -12  -3   19.00    6.60
   6 -12   3   10.80    7.50
  -6 -12  -3   -1.40    3.70
  -6 -12  -3   19.70    5.50
  -6  12  -3    8.80    6.20
  -6  12  -3   14.80    6.60
  -6  12  -3    4.90    4.90
  -6  12  -3   22.10    6.80
   7 -12   3   51.29   11.20
  -7 -12  -3   42.80    7.20
  -7 -12  -3   43.70    7.50
  -7 -12  -3   58.09    8.60
  -7 -12  -3   48.90    9.90
  -7  12  -3   46.20   10.20
  -7  12  -3   68.29   10.80
  -7  12  -3   64.29   12.20
   8 -12   3   -5.80    6.20
  -8 -12  -3   -3.40    5.20
  -8 -12  -3    5.80    4.10
  -8 -12  -3   -0.70    3.50
  -8 -12  -3   -2.50    3.10
  -8  12  -3   -7.40    4.60
  -8  12  -3   -3.60    5.30
  -8  12  -3    0.00    5.80
  -9 -12  -3    2.10    4.00
  -9 -12  -3    0.60    3.80
  -9 -12  -3    3.20    3.80
   9 -12   3    6.10    7.90
  -9  12  -3    6.80    7.40
  -9  12  -3    6.10    6.60
  -9  12  -3    2.20    6.40
  10 -12   3   -6.50    6.90
 -10 -12  -3    9.10    4.90
 -10  12  -3    4.60    7.30
 -10  12  -3    7.60    8.40
 -11  12  -3   -6.30    7.10
 -11  12  -3    4.10    7.80
 -10 -13   3   66.39   13.80
  10 -13  -3   68.99   13.60
 -10 -13   3   52.49    6.00
 -10 -13   3   57.29    6.00
 -10  13   3   57.49   13.60
 -10  13   3   60.09   12.20
  -9 -13   3   34.50   10.90
  -9 -13   3   24.70    4.60
   9 -13  -3   34.00   10.10
  -9 -13   3   31.60    4.80
  -9  13   3   17.60    8.80
  -9  13   3   21.80    9.40
  -8 -13   3    9.50    3.20
   8 -13  -3    0.40    6.40
  -8 -13   3   17.80    3.90
  -8 -13   3   11.10    8.30
  -8  13   3   11.20    6.50
  -8  13   3   12.60    7.70
  -7 -13   3  148.99    9.50
  -7 -13   3  170.88    9.90
   7 -13  -3  121.09   16.40
   7 -13  -3  161.38   18.90
  -7 -13   3  119.79   16.20
  -7  13   3  187.68   19.90
  -7  13   3  128.09   15.50
   6 -13  -3  173.08   19.00
  -6 -13   3  164.78   19.40
  -6 -13   3  168.28   10.50
   6 -13  -3  151.58   17.70
  -6 -13   3  175.28   10.10
  -6 -13   3  163.48   10.40
  -6  13   3  235.18   21.90
  -6  13   3  172.98   17.80
  -5 -13   3   -2.50    2.30
  -5 -13   3    0.10    3.00
   5 -13  -3   -2.30    5.30
  -5 -13   3    4.50    3.20
   5 -13  -3   -5.40    4.30
  -5  13   3    4.00    5.30
  -5  13   3   -4.90    4.40
   4 -13  -3   72.99   12.20
   4 -13  -3   46.60    9.70
  -4 -13   3   72.09    8.20
  -4 -13   3   66.49    7.70
  -4 -13   3   70.99    8.40
  -4  13   3   55.79    9.80
  -4  13   3   93.99   12.80
  -3 -13   3   76.59    9.30
  -3 -13   3   72.19    8.30
  -3 -13   3  100.79    9.90
   3 -13  -3   87.99   12.70
   3 -13  -3   76.59   11.70
  -3  13   3   80.59   11.20
   3  13  -3   94.29    9.80
  -3  13   3   85.29   12.00
   2 -13  -3    7.40    5.50
   2 -13  -3   14.00    6.30
  -2 -13   3    1.70    3.30
  -2 -13   3    9.10    3.60
  -2  13   3   18.80    6.40
   2  13  -3   11.70    4.70
  -2  13   3    5.70    5.00
  -1 -13   3   22.40    5.70
   1 -13  -3   11.00    5.90
   1 -13  -3   12.30    5.80
  -1 -13   3   21.20    4.80
  -1 -13   3   17.50    4.90
   1  13  -3   14.00    5.10
  -1  13   3   12.80    5.50
   1  13  -3   15.20    4.60
  -1  13   3   18.00    6.10
   0 -13  -3   52.39    9.50
   0 -13   3   42.60    7.50
   0 -13  -3   54.19    8.60
   0 -13   3   45.30    7.10
   0 -13  -3   43.20    8.00
   0 -13  -3   53.09    7.00
   0  13  -3   44.20    7.70
   0  13   3   63.29    9.30
   0  13   3   49.20    8.30
   0  13  -3   44.40    6.80
  -1 -13  -3  121.59   13.30
  -1 -13  -3  121.49   10.80
  -1 -13  -3  128.59   12.40
  -1 -13  -3  111.09   11.70
   1 -13   3  151.88   13.40
   1 -13   3  131.99   13.60
  -1  13  -3  130.39   11.80
  -1  13  -3  132.09   13.70
   1  13   3  120.89   12.80
  -1  13  -3  103.89   12.00
  -2 -13  -3   76.89    9.70
  -2 -13  -3   63.69    7.90
  -2 -13  -3   55.09    8.10
   2 -13   3   60.69    9.80
  -2 -13  -3   64.99    9.90
  -2  13  -3   74.19    9.50
   2  13   3   74.49    9.70
  -2  13  -3   62.49   10.10
  -2  13  -3   75.19   11.00
  -3 -13  -3   25.50    6.60
  -3 -13  -3   17.50    5.00
  -3 -13  -3   32.50    6.60
   3 -13   3   32.60    8.50
  -3 -13  -3   32.80    5.50
   3  13   3   28.20    6.50
  -3  13  -3   34.30    8.30
  -3  13  -3   22.90    6.60
  -3  13  -3   32.80    7.70
  -4 -13  -3   83.09   10.60
  -4 -13  -3   77.49    9.60
  -4 -13  -3   79.79   10.30
   4 -13   3   65.39   11.10
  -4 -13  -3   66.79    9.20
  -4  13  -3   54.19    9.50
  -4  13  -3   76.79   11.30
  -4  13  -3   73.39   11.30
   4  13   3   75.09    9.50
  -5 -13  -3   95.29   10.40
  -5 -13  -3   99.19   12.70
  -5 -13  -3  122.29   12.20
  -5 -13  -3  107.69   12.00
   5 -13   3  129.79   15.70
  -5 -13  -3  107.79   12.10
  -5  13  -3  123.49   15.10
  -5  13  -3   86.89   12.20
  -5  13  -3   84.59   12.30
  -6 -13  -3   15.50    5.40
  -6 -13  -3   26.30    7.10
  -6 -13  -3   25.30    6.00
   6 -13   3   20.10    7.70
  -6 -13  -3   22.50    7.90
  -6 -13  -3   29.90    6.60
  -6  13  -3   11.30    6.30
  -6  13  -3   28.00    8.30
   7 -13   3  101.59   15.30
  -7 -13  -3  127.49   12.40
  -7 -13  -3  107.79   11.70
  -7 -13  -3  103.79   14.10
  -7 -13  -3  113.79   11.60
  -7  13  -3  120.79   16.30
  -7  13  -3  132.59   16.80
   8 -13   3   66.39   13.40
  -8 -13  -3   86.49   10.60
  -8 -13  -3   88.39   10.50
  -8  13  -3   67.69   13.30
  -8  13  -3   73.59   13.30
   9 -13   3    2.10    8.30
  -9 -13  -3   -2.90    3.70
  -9  13  -3   -1.00    7.30
  -9  13  -3   -6.40    5.80
 -10 -13  -3    3.00    4.70
  10 -13   3   -2.80    8.00
 -10  13  -3   -4.40    7.20
 -10  13  -3   -0.20    8.30
 -10 -14   3    4.30    3.60
 -10 -14   3    2.00    3.20
  10 -14  -3    9.00    8.40
 -10 -14   3    6.40    9.30
 -10  14   3    2.80    7.80
 -10  14   3   -2.30    7.10
  -9 -14   3   -3.10    2.90
  -9 -14   3   -5.70    6.50
   9 -14  -3    4.40    6.90
  -9 -14   3    2.00    3.00
  -9  14   3   22.30   10.10
  -9  14   3    5.70    7.00
  -8 -14   3   36.90   10.50
   8 -14  -3   28.80   10.30
  -8 -14   3   29.10    5.30
  -8 -14   3   20.40    4.80
  -8  14   3   34.70   10.90
  -8  14   3   41.30   10.50
  -7 -14   3   13.30    4.00
  -7 -14   3   14.30    4.50
   7 -14  -3   12.50    8.60
   7 -14  -3   15.10    8.70
  -7 -14   3   17.70    7.70
  -7  14   3   19.00    8.50
  -7  14   3    6.20    6.50
   6 -14  -3   30.70   10.40
  -6 -14   3   19.70    4.70
   6 -14  -3   13.70    7.60
  -6 -14   3    5.00    6.60
  -6 -14   3   15.70    4.50
  -6 -14   3   20.40    4.50
  -6  14   3   28.60    8.50
  -6  14   3   17.40    7.90
  -5 -14   3  109.39   10.50
   5 -14  -3  102.19   15.90
  -5 -14   3  129.09   11.30
  -5 -14   3  112.39   10.60
   5 -14  -3  122.99   16.40
  -5  14   3  108.49   14.20
  -5  14   3  104.39   13.70
  -4 -14   3  256.17   14.90
  -4 -14   3  263.37   15.50
   4 -14  -3  245.68   22.30
  -4 -14   3  257.07   14.80
   4 -14  -3  211.28   20.40
  -4  14   3  262.57   19.50
  -4  14   3  206.58   19.70
  -3 -14   3    7.20    4.50
   3 -14  -3   17.80    6.80
  -3 -14   3    7.50    4.20
   3 -14  -3   12.50    7.10
  -3 -14   3    5.80    3.60
  -3  14   3    2.80    5.30
  -3  14   3    4.10    4.90
  -2 -14   3   29.50    6.00
  -2 -14   3   40.90    7.20
   2 -14  -3   34.70    8.00
  -2 -14   3   38.20    7.90
   2 -14  -3   24.70    7.80
  -2  14   3   15.70    6.10
   2  14  -3   22.00    6.20
  -2  14   3   21.10    7.10
  -1 -14   3  135.99   12.70
  -1 -14   3  126.59   10.00
   1 -14  -3  131.99   14.40
   1 -14  -3  148.59   16.10
   1  14  -3  156.68   12.00
  -1  14   3  141.89   14.70
  -1  14   3  153.38   15.70
   0 -14  -3    1.00    2.90
   0 -14   3    0.60    4.00
   0 -14   3    0.30    3.30
   0 -14  -3    0.20    4.80
   0 -14  -3    7.60    4.40
   0  14  -3    0.60    3.70
   0  14   3    4.20    5.00
   0  14  -3   -1.40    3.70
   0  14   3   -2.60    3.80
  -1 -14  -3  168.48   11.10
  -1 -14  -3  162.98   12.80
  -1 -14  -3  179.98   13.90
  -1 -14  -3  170.98   16.60
   1 -14   3  144.39   14.30
  -1  14  -3  172.08   12.50
   1  14   3  155.18   14.80
  -1  14  -3  151.98   14.50
  -2 -14  -3   50.99    7.70
   2 -14   3   61.79   10.10
  -2 -14  -3   48.90    7.20
  -2 -14  -3   45.50    7.70
  -2 -14  -3   42.50    8.90
  -2  14  -3   61.59   10.30
   2  14   3   58.19    9.20
  -2  14  -3   67.69    9.70
  -2  14  -3   53.29    9.70
   3 -14   3  119.79   14.00
  -3 -14  -3  131.09   12.80
  -3 -14  -3  144.29   14.50
  -3 -14  -3  136.49   12.30
  -3  14  -3  141.99   15.80
   3  14   3  118.49   12.90
  -3  14  -3  129.29   13.50
  -3  14  -3  113.09   13.50
   4 -14   3   73.69   13.00
  -4 -14  -3   83.39   10.20
  -4 -14  -3   92.09   11.50
  -4 -14  -3   78.89   10.20
  -4  14  -3  106.39   13.00
   4  14   3   98.69   11.30
  -4  14  -3   75.79   11.90
  -4  14  -3   71.39   11.70
  -5 -14  -3    6.40    4.80
  -5 -14  -3    4.80    4.90
  -5 -14  -3    5.30    4.80
   5 -14   3   10.10    7.20
  -5  14  -3   14.20    6.50
  -5  14  -3   13.00    7.50
  -5  14  -3   17.00    7.10
  -6 -14  -3   23.90    6.40
  -6 -14  -3   22.10    8.20
  -6 -14  -3   35.20    7.60
   6 -14   3   16.10    8.80
  -6  14  -3   34.40   10.40
  -6  14  -3   28.80    8.70
  -7 -14  -3   29.50    8.60
  -7 -14  -3   32.50    7.40
   7 -14   3   23.50    9.70
  -7 -14  -3   38.70    7.80
  -7  14  -3   26.40   10.30
  -7  14  -3   28.00    9.50
   8 -14   3   -6.40    7.10
  -8 -14  -3   -0.70    4.00
  -8 -14  -3    8.50    4.80
  -8  14  -3    6.90    7.20
  -8  14  -3   -4.70    7.40
   9 -14   3   -1.50    8.20
  -9 -14  -3    3.30    4.70
  -9  14  -3    5.20    8.30
  -9  14  -3   13.80    8.30
  10 -14   3   74.39   15.80
 -10 -14  -3   67.19   10.20
 -10  14  -3   49.50   12.50
 -10  14  -3  102.09   18.30
  -9 -15   3   29.10    5.60
  -9 -15   3   38.00   12.20
   9 -15  -3   22.80   11.00
  -9 -15   3   36.90    6.30
  -9  15   3   34.20   11.30
  -9  15   3   39.50   11.20
  -8 -15   3   15.90    4.70
  -8 -15   3   26.60    9.60
  -8 -15   3   20.50    5.10
   8 -15  -3   13.70    9.90
  -8  15   3   22.70    9.50
  -8  15   3   17.50    9.20
  -7 -15   3    1.20    3.10
  -7 -15   3    1.80    3.20
   7 -15  -3   -5.10    7.00
   7 -15  -3   -5.20    5.40
  -7 -15   3   -2.30    6.90
  -7  15   3   -2.40    5.80
  -7  15   3    1.20    6.60
  -6 -15   3   10.40    3.70
  -6 -15   3   10.30    5.00
   6 -15  -3   -4.50    6.00
  -6 -15   3    8.10    7.00
   6 -15  -3    4.50    8.20
  -6 -15   3    3.30    3.50
  -6  15   3    9.20    5.90
  -6  15   3    0.90    5.90
   5 -15  -3   -3.30    5.70
  -5 -15   3    0.60    3.50
  -5 -15   3    1.30    3.30
   5 -15  -3    0.30    6.50
  -5 -15   3   -2.80    3.30
  -5  15   3   13.70    7.10
  -5  15   3    1.20    5.50
  -4 -15   3   -1.90    3.70
  -4 -15   3    4.80    3.80
  -4 -15   3    3.50    3.40
   4 -15  -3   15.00    8.10
   4 -15  -3   -0.20    5.90
  -4  15   3   -6.40    4.90
  -4  15   3    5.00    6.40
   3 -15  -3   16.40    7.40
   3 -15  -3    2.40    6.20
  -3 -15   3   -1.00    4.50
  -3 -15   3    4.10    4.20
  -3 -15   3    7.10    4.20
  -3  15   3    1.30    4.90
  -3  15   3   -5.90    4.30
  -2 -15   3    0.40    4.60
  -2 -15   3   -0.60    3.90
   2 -15  -3  -11.10    4.80
   2 -15  -3   -5.30    4.50
   2  15  -3   -0.90    4.10
  -2  15   3    1.60    4.50
  -2  15   3   -8.90    3.40
  -1 -15   3    7.30    5.10
   1 -15  -3   13.90    6.70
   1 -15  -3    3.80    6.10
  -1 -15   3   12.20    4.70
   1  15  -3    7.40    5.00
  -1  15   3    2.90    5.00
  -1  15   3    0.80    5.20
   0 -15  -3   19.40    6.20
   0 -15   3    9.40    5.30
   0 -15  -3   22.80    7.40
   0 -15   3   16.30    5.30
   0  15   3   20.20    6.90
   0  15  -3   15.90    6.10
  -1 -15  -3   29.00    7.00
  -1 -15  -3   23.30    8.00
   1 -15   3   15.50    6.40
   1  15   3   22.60    6.90
  -1  15  -3   18.80    6.70
  -2 -15  -3   49.80    7.80
  -2 -15  -3   56.79    9.20
  -2 -15  -3   39.80    9.20
   2 -15   3   47.40    9.70
   2  15   3   62.99    9.80
  -2  15  -3   49.00    9.50
  -2  15  -3   45.30    8.30
  -3 -15  -3    7.70    5.70
   3 -15   3    8.00    5.90
  -3 -15  -3    3.70    4.30
   3  15   3   -0.60    4.40
  -3  15  -3   13.10    6.40
  -3  15  -3    9.90    6.10
  -3  15  -3    1.90    5.00
  -4 -15  -3    3.40    4.10
  -4 -15  -3    2.60    5.20
   4 -15   3    6.50    6.00
  -4  15  -3    2.70    6.20
  -4  15  -3    4.20    5.70
  -4  15  -3   -3.50    4.90
  -5 -15  -3   12.80    5.60
   5 -15   3   17.00    8.10
  -5 -15  -3   14.10    5.90
  -5  15  -3    6.60    6.80
  -5  15  -3   11.90    6.40
  -5  15  -3    5.30    6.00
   6 -15   3   36.60   10.30
  -6 -15  -3   25.30    7.30
  -6 -15  -3   11.80    5.60
  -6 -15  -3   30.30    9.80
  -6  15  -3   24.80    9.50
  -6  15  -3   12.30    7.10
   7 -15   3    5.70    7.30
  -7 -15  -3    0.90    4.40
  -7 -15  -3    1.10    4.80
  -7  15  -3    2.10    6.10
  -7  15  -3    2.90    7.60
  -8 -15  -3    8.80    5.50
  -8 -15  -3   10.00    5.50
   8 -15   3   -4.10    7.50
  -8  15  -3   -1.60    6.60
  -8  15  -3    4.40    7.50
   9 -15   3    0.80    8.90
  -9 -15  -3   -2.30    4.10
  -9  15  -3   -1.70    7.40
  -9  15  -3    2.80    7.30
  -9 -16   3   10.60    4.60
  -9 -16   3   15.60   10.90
   9 -16  -3   12.10   10.30
  -9 -16   3   13.20    4.90
  -9  16   3   12.30    9.20
  -9  16   3   15.00    9.50
   8 -16  -3   41.00   12.00
  -8 -16   3   25.20   10.30
  -8 -16   3   39.20    7.10
  -8 -16   3   28.90    6.10
  -8  16   3   46.00   11.80
  -8  16   3   25.40   10.00
  -7 -16   3    1.80    3.80
   7 -16  -3   -6.40    7.00
   7 -16  -3   11.20    8.40
  -7 -16   3   -2.70    6.60
  -7 -16   3    2.00    3.70
  -7  16   3    4.50    7.40
  -7  16   3    2.70    6.60
   6 -16  -3    4.10    7.00
  -6 -16   3    2.60    3.50
   6 -16  -3    1.30    6.70
  -6 -16   3    2.20    3.70
  -6 -16   3    7.80    4.70
  -6 -16   3  -11.60    4.80
  -6  16   3   12.60    7.70
  -6  16   3   -4.10    6.40
  -5 -16   3  126.09   12.30
   5 -16  -3   88.49   15.10
  -5 -16   3  103.09   11.80
  -5 -16   3  134.39   12.50
   5 -16  -3  107.69   16.20
  -5  16   3  125.09   17.70
  -5  16   3  128.69   16.30
  -4 -16   3   26.70    6.60
  -4 -16   3   35.50    7.70
   4 -16  -3   46.20   11.90
   4 -16  -3   33.70   10.00
  -4  16   3   37.40    9.80
  -4  16   3   31.50    9.20
   3 -16  -3   -4.50    5.10
  -3 -16   3    1.70    4.40
  -3 -16   3    3.00    5.30
   3 -16  -3    4.50    6.00
  -3  16   3   -0.40    5.10
  -3  16   3   -8.70    4.70
  -2 -16   3   93.89   11.60
   2 -16  -3   86.39   14.10
  -2 -16   3   93.99   12.50
   2 -16  -3   80.59   12.70
   2  16  -3  104.29   12.00
  -2  16   3   93.89   13.60
  -2  16   3   82.89   12.70
   1 -16  -3   83.09   12.00
   1 -16  -3   88.99   13.70
  -1 -16   3  100.09   12.40
  -1 -16   3   75.29   12.10
  -1  16   3   69.69   11.80
   1  16  -3   77.19   11.30
   0 -16   3   -3.50    3.90
   0 -16  -3    5.50    4.30
   0 -16  -3   11.50    6.10
   0  16   3   -1.30    4.40
   0  16  -3    1.90    4.80
  -1 -16  -3   73.49   10.40
   1 -16   3   74.39   10.90
  -1 -16  -3   62.69   11.50
   1  16   3   67.99   10.80
  -1  16  -3   77.09   12.00
   2 -16   3   27.20    7.80
  -2 -16  -3   19.30    7.10
  -2 -16  -3   24.50    7.90
  -2  16  -3   21.90    8.20
   2  16   3   42.20    8.50
  -3 -16  -3   22.90    7.70
  -3 -16  -3   38.00    8.10
   3 -16   3   53.29   11.10
   3  16   3   46.90    9.20
  -3  16  -3   37.60    9.00
  -3  16  -3   49.30    9.60
   4 -16   3    6.70    7.10
  -4 -16  -3   14.40    6.30
  -4 -16  -3   15.20    7.00
  -4  16  -3   11.60    6.60
  -4  16  -3   13.90    7.30
  -4  16  -3   24.20    8.00
  -5 -16  -3   17.50    6.90
   5 -16   3   21.20    8.80
  -5 -16  -3   15.30    6.10
  -5  16  -3    6.00    6.40
  -5  16  -3    1.90    5.70
  -6 -16  -3   21.40    6.70
  -6 -16  -3    6.10    5.30
  -6 -16  -3    9.00    8.00
   6 -16   3   -2.00    7.10
  -6  16  -3    7.40    7.40
  -6  16  -3    3.30    6.80
   7 -16   3   -0.70    8.10
  -7 -16  -3    2.30    4.50
  -7 -16  -3    7.40    5.70
  -7  16  -3   -3.90    6.90
  -7  16  -3    2.10    6.00
  -8 -16  -3    3.00    4.90
   8 -16   3    1.90    8.10
  -8 -16  -3    2.70    5.50
  -8  16  -3    6.50    7.80
  -8  16  -3   -0.80    7.30
   8 -17  -3   -1.50    9.50
  -8 -17   3   18.20    6.00
  -8 -17   3    2.80    7.80
  -8 -17   3    7.80    4.80
  -8  17   3    8.60    9.80
  -8  17   3   13.40    9.20
   7 -17  -3   11.50   10.60
  -7 -17   3   15.70    6.00
   7 -17  -3   13.90    9.70
  -7 -17   3   19.80    9.60
  -7 -17   3   33.10    6.90
  -7  17   3   35.60   10.80
  -7  17   3   25.90   10.50
  -6 -17   3   34.90    7.20
  -6 -17   3   20.80    9.90
   6 -17  -3   42.70   11.70
   6 -17  -3   53.39   12.90
  -6  17   3   50.89   12.80
  -6  17   3   27.70    9.90
   5 -17  -3    3.90    6.70
  -5 -17   3   -2.90    4.10
  -5 -17   3    1.80    4.40
   5 -17  -3   -4.50    7.30
  -5  17   3   -7.90    6.00
  -5  17   3    3.00    5.70
   4 -17  -3    8.20    8.00
   4 -17  -3    7.60    6.90
  -4 -17   3   16.20    6.30
  -4 -17   3   15.80    5.70
  -4  17   3   27.50    8.40
  -4  17   3   25.20    9.00
  -3 -17   3   40.40    9.00
   3 -17  -3   45.20   12.00
  -3 -17   3   47.90    9.30
   3 -17  -3   49.40   11.10
  -3  17   3   57.39   12.20
   2 -17  -3   29.40    9.30
  -2 -17   3   28.20    7.60
  -2 -17   3   20.20    7.40
   2 -17  -3   21.20    9.00
  -2  17   3    7.20    6.90
  -1 -17   3   29.20    8.60
   1 -17  -3   30.00    9.40
  -1 -17   3   38.40    8.90
   1 -17  -3   36.80    8.40
   1  17  -3   34.10    8.50
  -1  17   3   21.90    8.10
   0 -17  -3   30.20    9.10
   0 -17   3   16.10    5.90
   0 -17  -3   13.00    6.20
   0 -17   3   12.40    6.90
   0  17  -3   13.80    6.40
   0  17   3    2.80    5.60
   1 -17   3   47.30    9.70
  -1 -17  -3   68.69   10.90
  -1 -17  -3   68.49   12.00
  -1  17  -3   57.29   10.70
   1  17   3   88.79   13.00
  -2 -17  -3   -0.20    5.60
   2 -17   3    8.00    6.10
   2  17   3   17.40    6.50
  -2  17  -3   19.90    7.40
   3 -17   3   17.30    9.00
  -3 -17  -3   15.50    7.20
  -3 -17  -3   10.10    5.80
   3  17   3    0.80    5.10
  -3  17  -3   15.10    7.10
  -4 -17  -3    3.80    5.80
  -4 -17  -3    7.20    5.40
   4 -17   3   -8.40    5.70
  -4  17  -3    2.60    5.70
   5 -17   3   51.99   12.10
  -5 -17  -3   31.80    8.20
  -5 -17  -3   65.09   11.00
  -5  17  -3   44.90   11.40
  -6 -17  -3    6.70    6.40
  -6 -17  -3    8.50    5.80
   6 -17   3   -6.10    8.00
  -6  17  -3    8.30    7.80
  -6  17  -3   -2.10    6.20
   7 -17   3   15.50    9.50
  -7 -17  -3    5.90    6.20
  -7 -17  -3   13.50    5.60
  -7  17  -3    1.00    7.40
  -7  17  -3   17.40    9.20
   8 -17   3   12.20    9.50
  -8 -17  -3   37.70    9.20
  -8  17  -3   16.40    9.10
  -8  17  -3   20.30   10.20
   7 -18  -3    7.50   10.20
  -7 -18   3   10.80    9.90
  -7 -18   3    3.70    5.60
   7 -18  -3   -0.10    7.50
  -7  18   3   13.50    9.50
  -7  18   3    1.10    7.70
  -6 -18   3    3.80    5.30
   6 -18  -3   -6.10    7.30
   6 -18  -3   17.80   10.00
  -6 -18   3    5.30    7.20
  -6  18   3    5.60    8.60
  -6  18   3    3.30    8.20
   5 -18  -3    1.90    7.10
  -5 -18   3   -3.60    4.20
   5 -18  -3    1.00    8.10
  -5 -18   3   10.00    5.30
  -5  18   3   13.20    8.20
  -5  18   3    2.80    7.20
   4 -18  -3   -5.30    6.50
  -4 -18   3    0.30    5.60
   4 -18  -3   -7.20    7.30
  -4  18   3    1.90    6.40
   3 -18  -3    2.10    7.20
  -3 -18   3   13.90    6.50
   3 -18  -3   -7.30    6.30
  -3 -18   3    3.30    5.90
  -3  18   3   -6.70    5.30
  -2 -18   3    1.60    5.40
   2 -18  -3    8.70    7.10
  -2 -18   3   -1.20    5.60
   2 -18  -3   12.40    8.30
  -2  18   3   -3.40    5.20
   1 -18  -3   -3.00    6.60
  -1 -18   3   -0.90    5.30
   1 -18  -3   -4.80    5.10
  -1  18   3    0.00    6.00
   1  18  -3   -8.00    4.20
   0 -18  -3    5.30    5.70
   0 -18  -3   12.80    8.30
   0 -18   3   -1.00    5.80
   0  18   3    9.70    6.50
   0  18  -3   22.80    8.30
   1 -18   3   19.40    8.50
  -1 -18  -3    7.00    7.60
   1 -18   3   39.70    9.00
  -1  18  -3   31.30    8.60
   1  18   3   36.60    9.70
  -2 -18  -3    1.50    6.10
   2 -18   3    3.20    6.70
  -2  18  -3    3.10    5.30
[truncated: 1,167,322 more chars]
