# Supplementary material
Source: MDPI journal article supplement (https://www.mdpi.com/2624-8549/1/1/9)
Supplement: s1 [file s1 › 1dDCM_final CCDC 1935232.cif]

 
data_CAN_1dDCM
 
_audit_creation_method            'SHELXL-2017/1'
_chemical_name_systematic
;
 ?
;
_chemical_name_common             ?
_chemical_melting_point           ?
_chemical_formula_moiety          ?
_chemical_formula_sum
 'C25 H18 Cl2 Co N2 O4' 
_chemical_formula_weight          540.24

loop_
 _atom_type_symbol
 _atom_type_description
 _atom_type_scat_dispersion_real
 _atom_type_scat_dispersion_imag
 _atom_type_scat_source
 'C'  'C'   0.0033   0.0016
 'International Tables Vol C Tables 4.2.6.8 and 6.1.1.4'
 'H'  'H'   0.0000   0.0000
 'International Tables Vol C Tables 4.2.6.8 and 6.1.1.4'
 'N'  'N'   0.0061   0.0033
 'International Tables Vol C Tables 4.2.6.8 and 6.1.1.4'
 'O'  'O'   0.0106   0.0060
 'International Tables Vol C Tables 4.2.6.8 and 6.1.1.4'
 'Cl'  'Cl'   0.1484   0.1585
 'International Tables Vol C Tables 4.2.6.8 and 6.1.1.4'
 'Co'  'Co'   0.3494   0.9721
 'International Tables Vol C Tables 4.2.6.8 and 6.1.1.4'
 
_space_group_crystal_system       monoclinic
_space_group_IT_number            14
_space_group_name_H-M_alt         'P 21/c'
_space_group_name_Hall            '-P 2ybc'
 
_shelx_space_group_comment
;
The symmetry employed for this shelxl refinement is uniquely defined
by the following loop, which should always be used as a source of
symmetry information in preference to the above space-group names.
They are only intended as comments.
;
 
loop_
 _space_group_symop_operation_xyz
 'x, y, z'
 '-x, y+1/2, -z+1/2'
 '-x, -y, -z'
 'x, -y-1/2, z-1/2'
 
_cell_length_a                    10.5973(11)
_cell_length_b                    15.3082(15)
_cell_length_c                    14.8848(15)
_cell_angle_alpha                 90
_cell_angle_beta                  99.964(2)
_cell_angle_gamma                 90
_cell_volume                      2378.3(4)
_cell_formula_units_Z             4
_cell_measurement_temperature     100(2)
_cell_measurement_reflns_used     42669
_cell_measurement_theta_min       1.923
_cell_measurement_theta_max       28.141
 
_exptl_crystal_description        block
_exptl_crystal_colour             red
_exptl_crystal_density_meas       none
_exptl_crystal_density_method     'not measured'           
_exptl_crystal_density_diffrn     1.509          
_exptl_crystal_F_000              1100
_exptl_transmission_factor_min    0.715                                             
_exptl_transmission_factor_max    0.851                                         
_exptl_crystal_size_max           0.34
_exptl_crystal_size_mid           0.20
_exptl_crystal_size_min           0.16
_exptl_absorpt_coefficient_mu     0.981
_shelx_estimated_absorpt_T_min    ? 
_shelx_estimated_absorpt_T_max    ? 
_exptl_absorpt_correction_type    multi-scan
_exptl_absorpt_correction_T_min   ? 
_exptl_absorpt_correction_T_max   ? 
_exptl_absorpt_process_details    'SADABS; Sheldrick, 1996'
 
_exptl_special_details
;
 ?
;
 
_diffrn_ambient_temperature       100(2)
_diffrn_radiation_wavelength      0.71073
_diffrn_radiation_type            MoK\a
_diffrn_source                    'fine-focus sealed tube'
_diffrn_measurement_device_type   'Bruker Kappa Duo Apex II diffractometer'
_diffrn_measurement_method        '1.2\% \f scans and \w scans' 
_diffrn_detector_area_resol_mean  ? 
_diffrn_reflns_number             42669
_diffrn_reflns_av_unetI/netI      0.0456
_diffrn_reflns_av_R_equivalents   0.0661
_diffrn_reflns_limit_h_min        -13
_diffrn_reflns_limit_h_max        14
_diffrn_reflns_limit_k_min        -20
_diffrn_reflns_limit_k_max        20
_diffrn_reflns_limit_l_min        -19
_diffrn_reflns_limit_l_max        19
_diffrn_reflns_theta_min          1.923
_diffrn_reflns_theta_max          28.141
_diffrn_reflns_theta_full         25.242
_diffrn_measured_fraction_theta_max   1.000
_diffrn_measured_fraction_theta_full  1.000
_diffrn_reflns_Laue_measured_fraction_max    1.000
_diffrn_reflns_Laue_measured_fraction_full   1.000
_diffrn_reflns_point_group_measured_fraction_max   1.000
_diffrn_reflns_point_group_measured_fraction_full  1.000
_reflns_number_total              5821
_reflns_number_gt                 4338
_reflns_threshold_expression      'I > 2\s(I)'
_reflns_Friedel_coverage          0.000
_reflns_Friedel_fraction_max      .
_reflns_Friedel_fraction_full     .
 
_reflns_special_details
;
 Reflections were merged by SHELXL according to the crystal
 class for the calculation of statistics and refinement.
 
 _reflns_Friedel_fraction is defined as the number of unique
 Friedel pairs measured divided by the number that would be
 possible theoretically, ignoring centric projections and
 systematic absences.
;
 
_computing_data_collection        'APEX2 (Bruker, 2005)'
_computing_cell_refinement        'SAINT-Plus (Bruker, 2004)'
_computing_data_reduction         'SAINT-Plus and XPREP (Bruker 2004)'
_computing_structure_solution     'SHELXT 2014/5 (Sheldrick, 2014)'
_computing_structure_refinement   'SHELXL-2017/1 (Sheldrick, 2017)'
_computing_molecular_graphics     'X-seed (Barbour, 1999)'
_computing_publication_material   'SHELXL-97 (Sheldrick, 1997)'
 
_refine_special_details
;
 ?
;
_refine_ls_structure_factor_coef  Fsqd
_refine_ls_matrix_type            full
_refine_ls_weighting_scheme       calc
_refine_ls_weighting_details
'w=1/[\s^2^(Fo^2^)+(0.0402P)^2^+2.8513P] where P=(Fo^2^+2Fc^2^)/3'
_atom_sites_solution_primary      ?
_atom_sites_solution_secondary    ?
_atom_sites_solution_hydrogens    geom
_refine_ls_hydrogen_treatment     constr
_refine_ls_extinction_method      none
_refine_ls_extinction_coef        .
_refine_ls_number_reflns          5821
_refine_ls_number_parameters      335
_refine_ls_number_restraints      0
_refine_ls_R_factor_all           0.0696
_refine_ls_R_factor_gt            0.0454
_refine_ls_wR_factor_ref          0.1092
_refine_ls_wR_factor_gt           0.0987
_refine_ls_goodness_of_fit_ref    1.015
_refine_ls_restrained_S_all       1.015
_refine_ls_shift/su_max           0.000
_refine_ls_shift/su_mean          0.000
 
loop_
 _atom_site_label
 _atom_site_type_symbol
 _atom_site_fract_x
 _atom_site_fract_y
 _atom_site_fract_z
 _atom_site_U_iso_or_equiv
 _atom_site_adp_type
 _atom_site_occupancy
 _atom_site_site_symmetry_order  
 _atom_site_calc_flag
 _atom_site_refinement_flags_posn
 _atom_site_refinement_flags_adp
 _atom_site_refinement_flags_occupancy
 _atom_site_disorder_assembly
 _atom_site_disorder_group
Co1 Co 0.36641(3) 0.57759(2) 0.04048(2) 0.01725(10) Uani 1 1 d . . . . .
O1A O 0.52693(15) 0.97774(11) -0.39065(11) 0.0220(4) Uani 1 1 d . . . . .
N1A N 0.4761(2) 0.67111(14) -0.01942(14) 0.0224(4) Uani 1 1 d . . . . .
C1A C 0.6466(2) 0.98464(16) -0.36982(15) 0.0184(5) Uani 1 1 d . . . . .
O2A O 0.71438(16) 1.02649(11) -0.41649(11) 0.0220(4) Uani 1 1 d . . . . .
C2A C 0.7123(2) 0.94155(16) -0.28375(16) 0.0211(5) Uani 1 1 d . . . . .
C3A C 0.6423(2) 0.88795(16) -0.23561(16) 0.0210(5) Uani 1 1 d . . . . .
H3A H 0.5547 0.8815 -0.2559 0.025 Uiso 1 1 calc R U . . .
C4A C 0.7000(2) 0.84357(18) -0.15752(17) 0.0251(6) Uani 1 1 d . . . . .
C5A C 0.8314(3) 0.8561(2) -0.1282(2) 0.0403(8) Uani 1 1 d . . . . .
H5A H 0.8724 0.8274 -0.0761 0.048 Uiso 1 1 calc R U . . .
C6A C 0.9014(3) 0.9101(2) -0.1752(2) 0.0454(9) Uani 1 1 d . . . . .
H6A H 0.9885 0.9180 -0.1542 0.054 Uiso 1 1 calc R U . . .
C7A C 0.8429(3) 0.9528(2) -0.25341(19) 0.0330(7) Uani 1 1 d . . . . .
H7A H 0.8905 0.9887 -0.2853 0.040 Uiso 1 1 calc R U . . .
C8A C 0.6237(2) 0.78435(17) -0.10907(17) 0.0235(5) Uani 1 1 d . . . . .
C9A C 0.5108(2) 0.74664(18) -0.15415(17) 0.0288(6) Uani 1 1 d . . . . .
H9A H 0.4820 0.7587 -0.2155 0.035 Uiso 1 1 calc R U . . .
C10A C 0.4420(3) 0.69170(18) -0.10800(17) 0.0288(6) Uani 1 1 d . . . . .
H10A H 0.3672 0.6672 -0.1400 0.035 Uiso 1 1 calc R U . . .
C11A C 0.5845(3) 0.70771(19) 0.02377(18) 0.0315(6) Uani 1 1 d . . . . .
H11A H 0.6108 0.6950 0.0852 0.038 Uiso 1 1 calc R U . . .
C12A C 0.6593(3) 0.7630(2) -0.01729(18) 0.0344(7) Uani 1 1 d . . . . .
H12A H 0.7340 0.7862 0.0163 0.041 Uiso 1 1 calc R U . . .
O1B O -0.34074(16) 0.15757(12) 0.34397(11) 0.0258(4) Uani 1 1 d . . . . .
N1B N 0.26069(19) 0.48039(14) 0.10159(14) 0.0228(5) Uani 1 1 d . . . . .
C1B C -0.2361(2) 0.18560(17) 0.38766(16) 0.0223(5) Uani 1 1 d . . . . .
O2B O -0.20281(17) 0.16946(13) 0.47127(11) 0.0285(4) Uani 1 1 d . . . . .
C2B C -0.1488(2) 0.23673(17) 0.33848(17) 0.0232(5) Uani 1 1 d . . . . .
C3B C -0.1641(2) 0.23293(19) 0.24418(17) 0.0288(6) Uani 1 1 d . . . . .
H3B H -0.2294 0.1991 0.2118 0.035 Uiso 1 1 calc R U . . .
C4B C -0.0834(3) 0.2789(2) 0.19760(18) 0.0319(6) Uani 1 1 d . . . . .
H4B H -0.0954 0.2757 0.1343 0.038 Uiso 1 1 calc R U . . .
C5B C 0.0158(2) 0.32988(18) 0.24430(17) 0.0247(5) Uani 1 1 d . . . . .
C6B C 0.0280(3) 0.3349(2) 0.33904(19) 0.0381(7) Uani 1 1 d . . . . .
H6B H 0.0913 0.3703 0.3716 0.046 Uiso 1 1 calc R U . . .
C7B C -0.0524(3) 0.2882(2) 0.38529(19) 0.0378(7) Uani 1 1 d . . . . .
H7B H -0.0415 0.2916 0.4485 0.045 Uiso 1 1 calc R U . . .
C8B C 0.1021(2) 0.37950(17) 0.19461(17) 0.0250(5) Uani 1 1 d . . . . .
C9B C 0.0651(2) 0.40186(19) 0.10293(17) 0.0292(6) Uani 1 1 d . . . . .
H9B H -0.0138 0.3838 0.0710 0.035 Uiso 1 1 calc R U . . .
C10B C 0.1463(2) 0.45095(19) 0.05998(17) 0.0273(6) Uani 1 1 d . . . . .
H10B H 0.1201 0.4644 -0.0013 0.033 Uiso 1 1 calc R U . . .
C11B C 0.2973(3) 0.4568(2) 0.18916(18) 0.0321(6) Uani 1 1 d . . . . .
H11B H 0.3774 0.4749 0.2192 0.038 Uiso 1 1 calc R U . . .
C12B C 0.2229(3) 0.4074(2) 0.23677(18) 0.0344(7) Uani 1 1 d . . . . .
H12B H 0.2533 0.3926 0.2972 0.041 Uiso 1 1 calc R U . . .
Cl1C Cl 0.5348(10) 0.4228(10) 0.3966(8) 0.199(5) Uani 0.499(13) 1 d . . P A 1
C1C C 0.6794(14) 0.4346(15) 0.4390(9) 0.133(7) Uani 0.499(13) 1 d . . P A 1
H2C H 0.7095 0.4786 0.4008 0.160 Uiso 0.499(13) 1 calc R U P A 1
H1C H 0.7189 0.3804 0.4246 0.160 Uiso 0.499(13) 1 calc R U P A 1
Cl2C Cl 0.7529(6) 0.4582(4) 0.5417(5) 0.141(3) Uani 0.499(13) 1 d . . P A 1
C2C C 0.6476(13) 0.3859(7) 0.4817(9) 0.087(4) Uani 0.501(13) 1 d . . P A 2
H3C H 0.5760 0.3666 0.5094 0.104 Uiso 0.501(13) 1 calc R U P A 2
H4C H 0.7022 0.3349 0.4825 0.104 Uiso 0.501(13) 1 calc R U P A 2
Cl3C Cl 0.5830(5) 0.3946(3) 0.3721(3) 0.0852(15) Uani 0.501(13) 1 d . . P A 2
Cl4C Cl 0.7164(12) 0.4386(7) 0.5492(4) 0.203(4) Uani 0.501(13) 1 d . . P A 2
 
loop_
 _atom_site_aniso_label
 _atom_site_aniso_U_11
 _atom_site_aniso_U_22
 _atom_site_aniso_U_33
 _atom_site_aniso_U_23
 _atom_site_aniso_U_13
 _atom_site_aniso_U_12
Co1 0.01358(16) 0.02194(17) 0.01627(16) -0.00081(13) 0.00269(11) 0.00044(14)
O1A 0.0161(8) 0.0274(9) 0.0214(9) 0.0010(7) 0.0003(7) -0.0017(7)
N1A 0.0209(11) 0.0242(11) 0.0221(10) 0.0030(8) 0.0036(8) 0.0006(9)
C1A 0.0170(11) 0.0216(12) 0.0166(11) -0.0024(9) 0.0028(9) 0.0003(10)
O2A 0.0178(8) 0.0288(10) 0.0200(8) 0.0059(7) 0.0052(7) 0.0007(7)
C2A 0.0184(12) 0.0245(13) 0.0195(11) 0.0027(9) 0.0009(9) -0.0005(10)
C3A 0.0153(11) 0.0266(13) 0.0206(12) 0.0005(10) 0.0013(9) -0.0031(10)
C4A 0.0196(12) 0.0325(14) 0.0218(12) 0.0072(10) -0.0008(10) -0.0050(11)
C5A 0.0225(14) 0.056(2) 0.0375(16) 0.0239(15) -0.0091(12) -0.0073(14)
C6A 0.0176(13) 0.064(2) 0.0492(19) 0.0268(16) -0.0090(13) -0.0102(14)
C7A 0.0199(13) 0.0413(16) 0.0357(15) 0.0156(13) -0.0009(11) -0.0070(12)
C8A 0.0198(12) 0.0274(13) 0.0219(12) 0.0080(10) -0.0004(10) -0.0011(10)
C9A 0.0273(14) 0.0362(15) 0.0201(12) 0.0093(11) -0.0033(10) -0.0069(12)
C10A 0.0228(13) 0.0354(15) 0.0256(13) 0.0074(11) -0.0027(10) -0.0059(11)
C11A 0.0357(15) 0.0374(16) 0.0189(12) 0.0066(11) -0.0019(11) -0.0099(13)
C12A 0.0340(15) 0.0413(17) 0.0238(14) 0.0096(12) -0.0064(11) -0.0130(13)
O1B 0.0177(9) 0.0354(10) 0.0229(9) 0.0073(8) -0.0004(7) -0.0076(8)
N1B 0.0162(10) 0.0294(12) 0.0226(10) 0.0034(9) 0.0027(8) -0.0022(9)
C1B 0.0164(12) 0.0266(13) 0.0233(12) 0.0040(10) 0.0016(9) -0.0013(10)
O2B 0.0239(9) 0.0411(11) 0.0193(9) 0.0075(8) 0.0001(7) -0.0083(8)
C2B 0.0162(12) 0.0308(14) 0.0221(12) 0.0064(10) 0.0016(9) -0.0050(10)
C3B 0.0209(13) 0.0397(16) 0.0248(13) 0.0013(11) 0.0011(10) -0.0101(12)
C4B 0.0267(14) 0.0472(18) 0.0213(13) 0.0031(12) 0.0027(11) -0.0125(13)
C5B 0.0168(12) 0.0339(14) 0.0225(12) 0.0077(10) 0.0012(10) -0.0042(11)
C6B 0.0311(15) 0.055(2) 0.0249(14) 0.0053(13) -0.0033(12) -0.0206(14)
C7B 0.0348(16) 0.056(2) 0.0201(13) 0.0070(13) -0.0018(11) -0.0182(15)
C8B 0.0180(12) 0.0299(14) 0.0267(13) 0.0055(11) 0.0027(10) -0.0028(11)
C9B 0.0197(13) 0.0415(16) 0.0243(13) 0.0063(11) -0.0019(10) -0.0111(12)
C10B 0.0199(13) 0.0409(16) 0.0197(12) 0.0042(11) -0.0003(10) -0.0066(11)
C11B 0.0209(13) 0.0478(17) 0.0253(13) 0.0081(12) -0.0022(11) -0.0111(12)
C12B 0.0251(14) 0.0527(19) 0.0234(13) 0.0134(12) -0.0014(11) -0.0125(13)
Cl1C 0.119(6) 0.257(10) 0.186(7) 0.112(7) -0.075(5) -0.087(6)
C1C 0.119(11) 0.208(19) 0.074(9) -0.012(10) 0.021(8) -0.051(12)
Cl2C 0.110(3) 0.088(3) 0.186(6) -0.021(3) -0.082(3) -0.014(2)
C2C 0.099(9) 0.060(6) 0.093(9) 0.006(6) -0.010(7) -0.004(6)
Cl3C 0.088(3) 0.090(2) 0.0707(19) -0.0060(15) -0.0045(17) 0.018(2)
Cl4C 0.240(8) 0.259(9) 0.080(3) 0.022(4) -0.062(4) -0.083(7)
 
_geom_special_details
;
 All esds (except the esd in the dihedral angle between two l.s. planes)
 are estimated using the full covariance matrix.  The cell esds are taken
 into account individually in the estimation of esds in distances, angles
 and torsion angles; correlations between esds in cell parameters are only
 used when they are defined by crystal symmetry.  An approximate (isotropic)
 treatment of cell esds is used for estimating esds involving l.s. planes.
;
 
loop_
 _geom_bond_atom_site_label_1
 _geom_bond_atom_site_label_2
 _geom_bond_distance
 _geom_bond_site_symmetry_2
 _geom_bond_publ_flag
Co1 O1A 2.0145(16) 4_576 ?
Co1 O2A 2.0504(16) 2_644 ?
Co1 N1A 2.134(2) . ?
Co1 N1B 2.156(2) . ?
Co1 O1B 2.1663(17) 2 ?
Co1 O2B 2.2157(18) 2 ?
Co1 C1B 2.509(2) 2 ?
O1A C1A 1.257(3) . ?
O1A Co1 2.0145(16) 4_575 ?
N1A C11A 1.338(3) . ?
N1A C10A 1.343(3) . ?
C1A O2A 1.257(3) . ?
C1A C2A 1.501(3) . ?
O2A Co1 2.0504(16) 2_654 ?
C2A C3A 1.386(3) . ?
C2A C7A 1.390(3) . ?
C3A C4A 1.393(3) . ?
C3A H3A 0.9300 . ?
C4A C5A 1.399(4) . ?
C4A C8A 1.482(3) . ?
C5A C6A 1.380(4) . ?
C5A H5A 0.9300 . ?
C6A C7A 1.385(4) . ?
C6A H6A 0.9300 . ?
C7A H7A 0.9300 . ?
C8A C12A 1.392(3) . ?
C8A C9A 1.392(3) . ?
C9A C10A 1.373(4) . ?
C9A H9A 0.9300 . ?
C10A H10A 0.9300 . ?
C11A C12A 1.373(4) . ?
C11A H11A 0.9300 . ?
C12A H12A 0.9300 . ?
O1B C1B 1.260(3) . ?
O1B Co1 2.1663(17) 2_545 ?
N1B C10B 1.341(3) . ?
N1B C11B 1.343(3) . ?
C1B O2B 1.258(3) . ?
C1B C2B 1.496(3) . ?
C1B Co1 2.509(2) 2_545 ?
O2B Co1 2.2157(18) 2_545 ?
C2B C7B 1.380(4) . ?
C2B C3B 1.386(3) . ?
C3B C4B 1.383(4) . ?
C3B H3B 0.9300 . ?
C4B C5B 1.395(4) . ?
C4B H4B 0.9300 . ?
C5B C6B 1.396(4) . ?
C5B C8B 1.481(3) . ?
C6B C7B 1.384(4) . ?
C6B H6B 0.9300 . ?
C7B H7B 0.9300 . ?
C8B C12B 1.392(3) . ?
C8B C9B 1.396(3) . ?
C9B C10B 1.380(4) . ?
C9B H9B 0.9300 . ?
C10B H10B 0.9300 . ?
C11B C12B 1.375(4) . ?
C11B H11B 0.9300 . ?
C12B H12B 0.9300 . ?
Cl1C C1C 1.563(16) . ?
C1C Cl2C 1.632(13) . ?
C1C H2C 0.9700 . ?
C1C H1C 0.9700 . ?
C2C Cl4C 1.392(14) . ?
C2C Cl3C 1.662(13) . ?
C2C H3C 0.9700 . ?
C2C H4C 0.9700 . ?
 
loop_
 _geom_angle_atom_site_label_1
 _geom_angle_atom_site_label_2
 _geom_angle_atom_site_label_3
 _geom_angle
 _geom_angle_site_symmetry_1
 _geom_angle_site_symmetry_3
 _geom_angle_publ_flag
O1A Co1 O2A 118.81(7) 4_576 2_644 ?
O1A Co1 N1A 91.23(7) 4_576 . ?
O2A Co1 N1A 93.02(7) 2_644 . ?
O1A Co1 N1B 87.12(7) 4_576 . ?
O2A Co1 N1B 87.13(7) 2_644 . ?
N1A Co1 N1B 178.20(8) . . ?
O1A Co1 O1B 92.55(7) 4_576 2 ?
O2A Co1 O1B 147.14(7) 2_644 2 ?
N1A Co1 O1B 96.02(8) . 2 ?
N1B Co1 O1B 84.79(8) . 2 ?
O1A Co1 O2B 152.53(7) 4_576 2 ?
O2A Co1 O2B 88.39(7) 2_644 2 ?
N1A Co1 O2B 90.96(8) . 2 ?
N1B Co1 O2B 90.84(8) . 2 ?
O1B Co1 O2B 59.99(6) 2 2 ?
O1A Co1 C1B 122.59(7) 4_576 2 ?
O2A Co1 C1B 117.40(7) 2_644 2 ?
N1A Co1 C1B 96.66(8) . 2 ?
N1B Co1 C1B 84.85(8) . 2 ?
O1B Co1 C1B 30.14(7) 2 2 ?
O2B Co1 C1B 30.06(7) 2 2 ?
C1A O1A Co1 152.63(16) . 4_575 ?
C11A N1A C10A 115.9(2) . . ?
C11A N1A Co1 124.37(17) . . ?
C10A N1A Co1 119.60(17) . . ?
O1A C1A O2A 123.7(2) . . ?
O1A C1A C2A 118.2(2) . . ?
O2A C1A C2A 118.1(2) . . ?
C1A O2A Co1 120.15(15) . 2_654 ?
C3A C2A C7A 119.8(2) . . ?
C3A C2A C1A 119.4(2) . . ?
C7A C2A C1A 120.8(2) . . ?
C2A C3A C4A 121.5(2) . . ?
C2A C3A H3A 119.2 . . ?
C4A C3A H3A 119.2 . . ?
C3A C4A C5A 117.6(2) . . ?
C3A C4A C8A 120.4(2) . . ?
C5A C4A C8A 121.9(2) . . ?
C6A C5A C4A 121.1(2) . . ?
C6A C5A H5A 119.4 . . ?
C4A C5A H5A 119.4 . . ?
C5A C6A C7A 120.5(3) . . ?
C5A C6A H6A 119.7 . . ?
C7A C6A H6A 119.7 . . ?
C6A C7A C2A 119.3(3) . . ?
C6A C7A H7A 120.3 . . ?
C2A C7A H7A 120.3 . . ?
C12A C8A C9A 116.1(2) . . ?
C12A C8A C4A 122.9(2) . . ?
C9A C8A C4A 121.0(2) . . ?
C10A C9A C8A 120.0(2) . . ?
C10A C9A H9A 120.0 . . ?
C8A C9A H9A 120.0 . . ?
N1A C10A C9A 124.0(2) . . ?
N1A C10A H10A 118.0 . . ?
C9A C10A H10A 118.0 . . ?
N1A C11A C12A 123.9(2) . . ?
N1A C11A H11A 118.0 . . ?
C12A C11A H11A 118.0 . . ?
C11A C12A C8A 120.2(3) . . ?
C11A C12A H12A 119.9 . . ?
C8A C12A H12A 119.9 . . ?
C1B O1B Co1 90.17(14) . 2_545 ?
C10B N1B C11B 116.4(2) . . ?
C10B N1B Co1 122.11(17) . . ?
C11B N1B Co1 120.70(17) . . ?
O2B C1B O1B 121.0(2) . . ?
O2B C1B C2B 119.7(2) . . ?
O1B C1B C2B 119.3(2) . . ?
O2B C1B Co1 61.93(13) . 2_545 ?
O1B C1B Co1 59.68(12) . 2_545 ?
C2B C1B Co1 170.33(19) . 2_545 ?
C1B O2B Co1 88.00(14) . 2_545 ?
C7B C2B C3B 118.8(2) . . ?
C7B C2B C1B 121.2(2) . . ?
C3B C2B C1B 120.0(2) . . ?
C4B C3B C2B 120.8(2) . . ?
C4B C3B H3B 119.6 . . ?
C2B C3B H3B 119.6 . . ?
C3B C4B C5B 120.9(2) . . ?
C3B C4B H4B 119.6 . . ?
C5B C4B H4B 119.6 . . ?
C4B C5B C6B 117.7(2) . . ?
C4B C5B C8B 121.0(2) . . ?
C6B C5B C8B 121.2(2) . . ?
C7B C6B C5B 121.1(3) . . ?
C7B C6B H6B 119.4 . . ?
C5B C6B H6B 119.4 . . ?
C2B C7B C6B 120.7(3) . . ?
C2B C7B H7B 119.7 . . ?
C6B C7B H7B 119.7 . . ?
C12B C8B C9B 116.5(2) . . ?
C12B C8B C5B 122.1(2) . . ?
C9B C8B C5B 121.4(2) . . ?
C10B C9B C8B 119.6(2) . . ?
C10B C9B H9B 120.2 . . ?
C8B C9B H9B 120.2 . . ?
N1B C10B C9B 123.8(2) . . ?
N1B C10B H10B 118.1 . . ?
C9B C10B H10B 118.1 . . ?
N1B C11B C12B 123.5(2) . . ?
N1B C11B H11B 118.2 . . ?
C12B C11B H11B 118.2 . . ?
C11B C12B C8B 120.1(2) . . ?
C11B C12B H12B 120.0 . . ?
C8B C12B H12B 120.0 . . ?
Cl1C C1C Cl2C 132.8(12) . . ?
Cl1C C1C H2C 104.0 . . ?
Cl2C C1C H2C 104.0 . . ?
Cl1C C1C H1C 104.0 . . ?
Cl2C C1C H1C 104.0 . . ?
H2C C1C H1C 105.5 . . ?
Cl4C C2C Cl3C 137.5(9) . . ?
Cl4C C2C H3C 102.8 . . ?
Cl3C C2C H3C 102.8 . . ?
Cl4C C2C H4C 102.8 . . ?
Cl3C C2C H4C 102.8 . . ?
H3C C2C H4C 105.0 . . ?
 
loop_
 _geom_torsion_atom_site_label_1
 _geom_torsion_atom_site_label_2
 _geom_torsion_atom_site_label_3
 _geom_torsion_atom_site_label_4
 _geom_torsion
 _geom_torsion_site_symmetry_1
 _geom_torsion_site_symmetry_2
 _geom_torsion_site_symmetry_3
 _geom_torsion_site_symmetry_4
 _geom_torsion_publ_flag
Co1 O1A C1A O2A 82.9(4) 4_575 . . . ?
Co1 O1A C1A C2A -97.9(4) 4_575 . . . ?
O1A C1A O2A Co1 -6.4(3) . . . 2_654 ?
C2A C1A O2A Co1 174.47(16) . . . 2_654 ?
O1A C1A C2A C3A 7.1(3) . . . . ?
O2A C1A C2A C3A -173.7(2) . . . . ?
O1A C1A C2A C7A -174.8(3) . . . . ?
O2A C1A C2A C7A 4.4(4) . . . . ?
C7A C2A C3A C4A -0.9(4) . . . . ?
C1A C2A C3A C4A 177.2(2) . . . . ?
C2A C3A C4A C5A 1.1(4) . . . . ?
C2A C3A C4A C8A -177.9(2) . . . . ?
C3A C4A C5A C6A -0.3(5) . . . . ?
C8A C4A C5A C6A 178.7(3) . . . . ?
C4A C5A C6A C7A -0.6(6) . . . . ?
C5A C6A C7A C2A 0.7(5) . . . . ?
C3A C2A C7A C6A 0.0(4) . . . . ?
C1A C2A C7A C6A -178.1(3) . . . . ?
C3A C4A C8A C12A -156.5(3) . . . . ?
C5A C4A C8A C12A 24.6(4) . . . . ?
C3A C4A C8A C9A 23.6(4) . . . . ?
C5A C4A C8A C9A -155.4(3) . . . . ?
C12A C8A C9A C10A -0.2(4) . . . . ?
C4A C8A C9A C10A 179.7(3) . . . . ?
C11A N1A C10A C9A -0.1(4) . . . . ?
Co1 N1A C10A C9A -175.7(2) . . . . ?
C8A C9A C10A N1A 0.4(5) . . . . ?
C10A N1A C11A C12A -0.2(4) . . . . ?
Co1 N1A C11A C12A 175.1(2) . . . . ?
N1A C11A C12A C8A 0.3(5) . . . . ?
C9A C8A C12A C11A -0.1(4) . . . . ?
C4A C8A C12A C11A 180.0(3) . . . . ?
Co1 O1B C1B O2B -9.4(3) 2_545 . . . ?
Co1 O1B C1B C2B 168.9(2) 2_545 . . . ?
O1B C1B O2B Co1 9.2(3) . . . 2_545 ?
C2B C1B O2B Co1 -169.1(2) . . . 2_545 ?
O2B C1B C2B C7B -19.5(4) . . . . ?
O1B C1B C2B C7B 162.2(3) . . . . ?
O2B C1B C2B C3B 160.6(3) . . . . ?
O1B C1B C2B C3B -17.8(4) . . . . ?
C7B C2B C3B C4B 0.9(4) . . . . ?
C1B C2B C3B C4B -179.2(3) . . . . ?
C2B C3B C4B C5B 0.3(4) . . . . ?
C3B C4B C5B C6B -1.9(4) . . . . ?
C3B C4B C5B C8B -179.7(3) . . . . ?
C4B C5B C6B C7B 2.4(5) . . . . ?
C8B C5B C6B C7B -179.8(3) . . . . ?
C3B C2B C7B C6B -0.3(5) . . . . ?
C1B C2B C7B C6B 179.7(3) . . . . ?
C5B C6B C7B C2B -1.3(5) . . . . ?
C4B C5B C8B C12B -159.0(3) . . . . ?
C6B C5B C8B C12B 23.2(4) . . . . ?
C4B C5B C8B C9B 22.0(4) . . . . ?
C6B C5B C8B C9B -155.7(3) . . . . ?
C12B C8B C9B C10B -1.5(4) . . . . ?
C5B C8B C9B C10B 177.6(3) . . . . ?
C11B N1B C10B C9B 2.5(4) . . . . ?
Co1 N1B C10B C9B -167.3(2) . . . . ?
C8B C9B C10B N1B -0.9(5) . . . . ?
C10B N1B C11B C12B -1.8(4) . . . . ?
Co1 N1B C11B C12B 168.2(2) . . . . ?
N1B C11B C12B C8B -0.5(5) . . . . ?
C9B C8B C12B C11B 2.1(4) . . . . ?
C5B C8B C12B C11B -176.9(3) . . . . ?
 
loop_
 _geom_hbond_atom_site_label_D 
 _geom_hbond_atom_site_label_H 
 _geom_hbond_atom_site_label_A 
 _geom_hbond_distance_DH 
 _geom_hbond_distance_HA 
 _geom_hbond_distance_DA 
 _geom_hbond_angle_DHA 
 _geom_hbond_site_symmetry_A 
C9A H9A O1B  0.93 2.56 3.409(3) 152.0 3_565
C11B H11B O1A  0.93 2.57 3.055(3) 112.9 4_576
C9B H9B O2B  0.93 2.42 3.342(3) 172.0 4_565
C10A H10A O2A  0.93 2.52 3.080(3) 119.0 2_644
C11B H11B Cl1C  0.93 2.98 3.668(6) 132.1 .
C10A H10A O2A  0.93 2.52 3.080(3) 119.0 2_644
C10B H10B O2A  0.93 2.49 3.028(3) 116.8 2_644
C11B H11B O1A  0.93 2.57 3.055(3) 112.9 4_576
 
_refine_diff_density_max    0.646
_refine_diff_density_min   -0.699
_refine_diff_density_rms    0.074

_shelxl_version_number 2014-3

_shelx_res_file
;
TITL C:cm_a.res in P
CELL 0.71073 10.5973 15.3082 14.8848 90.000 99.964 90.000
ZERR 4.0000 0.0011 0.0015 0.0015 0.000 0.002 0.000
LATT 1
SYMM -X, 0.5+Y, 0.5-Z
SFAC C H N O CL CO
UNIT 100 72 8 16 8 4
BOND $H
CONF
EQIV $1 1-X,Y-1/2,Z-1/2
EQIV $2 -X,1/2+Y,1/2-Z
EQIV $3 X,1/2-Y,1/2+Z
EQIV $4 X,1/2-Y,Z-1/2
EQIV $5 -X,1-Y,-Z
EQIV $6 1-X,Y-1/2,-Z-1/2
EQIV $7 X,3/2-Y,1/2+Z
HTAB C9A O1B_$5
HTAB C11B O1A_$7
HTAB C9B O2B_$4
HTAB C10A O2A_$6
HTAB C11B Cl1C
HTAB C10A O2A_$6
HTAB C10B O2A_$6
HTAB C11B O1A_$7
ACTA
FMAP 2 1 53
PLAN 20 0 0
HTAB 2.0
LIST 6 1
L.S. 10
WGHT    0.040200    2.851300
FVAR       0.25006   0.49871
CO1   6    0.366412    0.577590    0.040477    11.00000    0.01358    0.02194 =
         0.01627   -0.00081    0.00269    0.00044
O1A   4    0.526928    0.977735   -0.390651    11.00000    0.01610    0.02740 =
         0.02142    0.00099    0.00026   -0.00173
N1A   3    0.476140    0.671106   -0.019421    11.00000    0.02089    0.02415 =
         0.02215    0.00304    0.00361    0.00057
C1A   1    0.646632    0.984640   -0.369816    11.00000    0.01702    0.02158 =
         0.01657   -0.00245    0.00276    0.00035
O2A   4    0.714381    1.026487   -0.416492    11.00000    0.01779    0.02884 =
         0.01999    0.00586    0.00518    0.00073
C2A   1    0.712325    0.941545   -0.283753    11.00000    0.01837    0.02454 =
         0.01946    0.00268    0.00092   -0.00046
C3A   1    0.642276    0.887950   -0.235607    11.00000    0.01528    0.02661 =
         0.02059    0.00050    0.00130   -0.00308
AFIX  43
H3A   2    0.554727    0.881478   -0.255910    11.00000   -1.20000
AFIX   0
C4A   1    0.699980    0.843566   -0.157523    11.00000    0.01956    0.03245 =
         0.02184    0.00722   -0.00081   -0.00499
C5A   1    0.831435    0.856064   -0.128161    11.00000    0.02245    0.05588 =
         0.03755    0.02389   -0.00913   -0.00734
AFIX  43
H5A   2    0.872364    0.827448   -0.076067    11.00000   -1.20000
AFIX   0
C6A   1    0.901373    0.910126   -0.175187    11.00000    0.01764    0.06401 =
         0.04917    0.02678   -0.00901   -0.01021
AFIX  43
H6A   2    0.988507    0.917954   -0.154171    11.00000   -1.20000
AFIX   0
C7A   1    0.842895    0.952820   -0.253412    11.00000    0.01995    0.04132 =
         0.03567    0.01561   -0.00088   -0.00703
AFIX  43
H7A   2    0.890511    0.988686   -0.285339    11.00000   -1.20000
AFIX   0
C8A   1    0.623720    0.784353   -0.109070    11.00000    0.01978    0.02743 =
         0.02192    0.00796   -0.00037   -0.00110
C9A   1    0.510782    0.746641   -0.154154    11.00000    0.02735    0.03622 =
         0.02009    0.00931   -0.00332   -0.00692
AFIX  43
H9A   2    0.481952    0.758672   -0.215515    11.00000   -1.20000
AFIX   0
C10A  1    0.442002    0.691696   -0.108004    11.00000    0.02279    0.03543 =
         0.02562    0.00743   -0.00269   -0.00587
AFIX  43
H10A  2    0.367207    0.667236   -0.140024    11.00000   -1.20000
AFIX   0
C11A  1    0.584543    0.707712    0.023765    11.00000    0.03572    0.03743 =
         0.01891    0.00657   -0.00186   -0.00990
AFIX  43
H11A  2    0.610766    0.694955    0.085249    11.00000   -1.20000
AFIX   0
C12A  1    0.659327    0.762963   -0.017286    11.00000    0.03397    0.04130 =
         0.02382    0.00963   -0.00643   -0.01305
AFIX  43
H12A  2    0.733966    0.786161    0.016306    11.00000   -1.20000
AFIX   0
O1B   4   -0.340740    0.157571    0.343975    11.00000    0.01770    0.03538 =
         0.02288    0.00732   -0.00042   -0.00758
N1B   3    0.260694    0.480392    0.101593    11.00000    0.01617    0.02936 =
         0.02261    0.00345    0.00273   -0.00224
C1B   1   -0.236062    0.185598    0.387658    11.00000    0.01636    0.02665 =
         0.02333    0.00395    0.00158   -0.00132
O2B   4   -0.202811    0.169461    0.471272    11.00000    0.02386    0.04110 =
         0.01925    0.00747    0.00007   -0.00830
C2B   1   -0.148814    0.236727    0.338476    11.00000    0.01622    0.03081 =
         0.02209    0.00640    0.00159   -0.00504
C3B   1   -0.164053    0.232933    0.244182    11.00000    0.02089    0.03975 =
         0.02476    0.00132    0.00106   -0.01005
AFIX  43
H3B   2   -0.229395    0.199058    0.211828    11.00000   -1.20000
AFIX   0
C4B   1   -0.083355    0.278864    0.197599    11.00000    0.02668    0.04724 =
         0.02126    0.00313    0.00269   -0.01254
AFIX  43
H4B   2   -0.095369    0.275696    0.134296    11.00000   -1.20000
AFIX   0
C5B   1    0.015821    0.329881    0.244298    11.00000    0.01682    0.03390 =
         0.02252    0.00769    0.00115   -0.00418
C6B   1    0.028024    0.334938    0.339041    11.00000    0.03109    0.05536 =
         0.02493    0.00529   -0.00328   -0.02057
AFIX  43
H6B   2    0.091288    0.370278    0.371629    11.00000   -1.20000
AFIX   0
C7B   1   -0.052436    0.288248    0.385286    11.00000    0.03476    0.05634 =
         0.02008    0.00701   -0.00184   -0.01818
AFIX  43
H7B   2   -0.041451    0.291624    0.448545    11.00000   -1.20000
AFIX   0
C8B   1    0.102134    0.379501    0.194609    11.00000    0.01798    0.02989 =
         0.02668    0.00554    0.00266   -0.00278
C9B   1    0.065121    0.401859    0.102927    11.00000    0.01966    0.04149 =
         0.02430    0.00629   -0.00188   -0.01105
AFIX  43
H9B   2   -0.013803    0.383762    0.070967    11.00000   -1.20000
AFIX   0
C10B  1    0.146271    0.450953    0.059983    11.00000    0.01988    0.04094 =
         0.01968    0.00418   -0.00031   -0.00655
AFIX  43
H10B  2    0.120099    0.464395   -0.001343    11.00000   -1.20000
AFIX   0
C11B  1    0.297323    0.456838    0.189165    11.00000    0.02086    0.04779 =
         0.02530    0.00813   -0.00219   -0.01113
AFIX  43
H11B  2    0.377358    0.474941    0.219208    11.00000   -1.20000
AFIX   0
C12B  1    0.222898    0.407424    0.236769    11.00000    0.02510    0.05272 =
         0.02336    0.01338   -0.00139   -0.01254
AFIX  43
H12B  2    0.253302    0.392634    0.297240    11.00000   -1.20000
AFIX   0
PART 1
CL1C  5    0.534792    0.422807    0.396627    21.00000    0.11934    0.25650 =
         0.18555    0.11240   -0.07509   -0.08667
C1C   1    0.679408    0.434600    0.438984    21.00000    0.11912    0.20768 =
         0.07414   -0.01219    0.02059   -0.05065
AFIX  23
H2C   2    0.709480    0.478634    0.400841    21.00000   -1.20000
H1C   2    0.718925    0.380401    0.424565    21.00000   -1.20000
AFIX   0
CL2C  5    0.752887    0.458226    0.541717    21.00000    0.11009    0.08822 =
         0.18562   -0.02105   -0.08193   -0.01392
PART 2
C2C   1    0.647634    0.385853    0.481723   -21.00000    0.09866    0.05973 =
         0.09298    0.00556   -0.00980   -0.00365
AFIX  23
H3C   2    0.575974    0.366583    0.509351   -21.00000   -1.20000
H4C   2    0.702213    0.334889    0.482544   -21.00000   -1.20000
AFIX   0
CL3C  5    0.583005    0.394590    0.372138   -21.00000    0.08831    0.09019 =
         0.07073   -0.00598   -0.00450    0.01798
CL4C  5    0.716377    0.438565    0.549210   -21.00000    0.23983    0.25892 =
         0.07955    0.02187   -0.06176   -0.08347
HKLF 4

REM  C:cm_a.res in P
REM R1 =  0.0454 for    4338 Fo > 4sig(Fo)  and  0.0696 for all    5821 data
REM    335 parameters refined using      0 restraints

END

WGHT      0.0403      2.8394

REM Instructions for potential hydrogen bonds
HTAB C9A O1B_$5
HTAB C10A O2A_$6
HTAB C9B O2B_$4
HTAB C10B O2A_$6
HTAB C11B O1A_$7
HTAB C11B Cl1C

REM Highest difference peak  0.646,  deepest hole -0.699,  1-sigma level  0.074
Q1    1   0.5801  0.3603  0.4206  11.00000  0.05    0.65
Q2    1   0.7347  0.4033  0.5351  11.00000  0.05    0.44
Q3    1   0.6689  0.4852  0.5249  11.00000  0.05    0.44
Q4    1   0.6156  0.4546  0.5370  11.00000  0.05    0.36
Q5    1  -0.0083  0.2339  0.3777  11.00000  0.05    0.36
Q6    1  -0.3196  0.1560  0.4634  11.00000  0.05    0.35
Q7    1   0.0809  0.2795  0.3203  11.00000  0.05    0.35
Q8    1  -0.2023  0.2172  0.3620  11.00000  0.05    0.33
Q9    1   0.6854  0.4583  0.5611  11.00000  0.05    0.31
Q10   1   0.6585  0.4242  0.3817  11.00000  0.05    0.31
Q11   1   0.6558  0.7574 -0.0772  11.00000  0.05    0.28
Q12   1   0.3317  0.6483  0.0575  11.00000  0.05    0.28
Q13   1   0.0070  0.3432  0.2830  11.00000  0.05    0.27
Q14   1   0.0480  0.3645  0.2208  11.00000  0.05    0.26
Q15   1   0.6969  0.3993  0.4609  11.00000  0.05    0.26
Q16   1   0.7428  0.4633  0.4876  11.00000  0.05    0.26
Q17   1   0.3960  0.5225  0.0157  11.00000  0.05    0.26
Q18   1   0.3178  0.5165  0.0619  11.00000  0.05    0.26
Q19   1   0.5029  0.4455  0.4154  11.00000  0.05    0.26
Q20   1   0.6584  0.8192 -0.1249  11.00000  0.05    0.25
;
_shelx_res_checksum   60868

_shelx_hkl_file
;
  -1   0   0 1184.28   32.00
  -1   0   0 1162.68   31.50
   1   0   0 1185.78   32.10
   2   0   0  331.97   10.30
   2   0   0  334.37   10.30
  -2   0   0  331.47   10.20
  -2   0   0  335.87   10.00
  -2   0   0  342.37   10.40
  -3   0   0  423.86   13.20
   3   0   0  428.66   13.30
  -3   0   0  431.66   13.40
   3   0   0  416.06   13.30
   3   0   0  412.76   13.20
  -3   0   0  427.36   12.90
  -4   0   0  185.28    7.40
   4   0   0  182.48    7.40
   4   0   0  208.08    7.60
  -4   0   0  193.78    7.30
  -4   0   0  193.58    7.80
   4   0   0  188.38    7.60
   5   0   0   24.80    3.00
  -5   0   0   27.90    3.40
   5   0   0   22.60    3.00
  -5   0   0   33.90    4.10
   5   0   0   23.70    3.50
  -5   0   0   17.20    2.50
  -6   0   0  121.39    6.90
  -6   0   0  115.29    6.20
   6   0   0  124.59    6.40
   6   0   0  130.89    6.60
   6   0   0  127.79    6.80
  -6   0   0  121.69    6.50
  -7   0   0  204.98    9.00
   7   0   0  187.98    8.90
  -7   0   0  188.28    8.90
   7   0   0  187.78    9.30
   7   0   0  183.78    8.80
  -7   0   0  188.38    9.40
   8   0   0  167.38    9.30
  -8   0   0  198.68    9.40
  -8   0   0  169.38    9.50
  -8   0   0  178.38    9.00
   8   0   0  172.98    9.00
   8   0   0  173.38    9.00
   9   0   0   43.90    5.50
  -9   0   0   30.70    4.70
  -9   0   0   35.50    5.30
   9   0   0   29.00    4.50
   9   0   0   39.80    6.00
  -9   0   0   42.00    5.80
  10   0   0   97.39    8.40
 -10   0   0   83.89    8.30
 -10   0   0   67.39    8.10
  10   0   0  104.79   10.50
  11   0   0  119.49   11.00
  11   0   0  138.99    9.40
 -11   0   0  123.39   11.60
 -11   0   0  134.99    9.60
 -12   0   0   25.90    5.60
  12   0   0   23.70    6.00
 -12   0   0   21.10    5.90
 -13   0   0    6.00    3.80
  13   0   0   10.00    5.50
  -1  -1   0  205.68    6.20
   1  -1   0  201.18    5.80
   1  -1   0  195.18    5.80
   1  -1   0  185.98    5.70
   1   1   0  194.58    6.10
   1   1   0  211.18    6.20
  -1   1   0  197.28    5.70
   2  -1   0   24.90    1.80
  -2  -1   0   38.00    2.90
   2  -1   0   23.80    1.80
  -2  -1   0   35.70    2.60
   2  -1   0   24.10    1.70
  -2  -1   0   31.00    2.60
  -2   1   0   23.40    1.70
  -2   1   0   26.90    1.80
   2   1   0   24.60    2.20
   2   1   0   36.30    2.70
  -2   1   0   28.00    2.10
   3  -1   0    3.90    1.20
  -3  -1   0    2.10    1.40
   3  -1   0    4.40    1.20
  -3  -1   0    1.20    1.40
   3  -1   0    1.80    1.20
  -3  -1   0    3.70    1.60
   3   1   0    3.50    1.50
   3   1   0    4.30    1.30
  -3   1   0    4.70    1.30
   3   1   0    3.30    1.50
  -3   1   0    5.80    1.60
  -3   1   0    3.10    1.30
   4  -1   0  155.28    6.50
  -4  -1   0  156.58    6.50
  -4  -1   0  158.38    6.70
   4  -1   0  159.58    6.30
   4  -1   0  160.18    6.40
  -4  -1   0  161.08    6.90
  -4   1   0  156.98    6.70
   4   1   0  149.88    6.50
  -4   1   0  147.29    6.10
  -4   1   0  168.58    6.40
   4   1   0  152.38    6.60
   4   1   0  165.48    6.90
  -5  -1   0    2.00    1.40
  -5  -1   0   -0.30    1.60
   5  -1   0   -0.20    1.10
  -5  -1   0    1.10    1.60
   5  -1   0   -0.10    1.40
   5  -1   0    0.70    1.30
  -5   1   0    1.40    1.50
   5   1   0   -1.10    1.40
   5   1   0    1.70    1.30
   5   1   0    0.20    1.10
  -5   1   0    0.90    1.50
   5   1   0    0.30    1.20
  -5   1   0    0.00    1.30
  -6  -1   0   48.20    5.00
   6  -1   0   47.70    5.00
  -6  -1   0   39.80    4.40
   6  -1   0   38.70    4.00
  -6  -1   0   37.60    4.10
   6  -1   0   29.80    3.50
  -6   1   0   40.70    4.80
  -6   1   0   43.50    4.30
   6   1   0   35.70    4.10
  -6   1   0   42.20    4.20
   6   1   0   39.30    4.50
   6   1   0   36.00    4.30
   6   1   0   41.30    4.40
  -7  -1   0    0.00    2.10
   7  -1   0    1.40    2.30
  -7  -1   0    3.80    2.30
   7  -1   0    0.60    1.80
  -7  -1   0    5.30    2.50
   7  -1   0    1.10    1.80
  -7   1   0    1.00    2.10
   7   1   0    0.30    1.80
  -7   1   0    0.80    2.00
  -7   1   0    1.00    2.10
   7   1   0    2.40    2.30
   7   1   0    2.40    1.80
   7   1   0    5.00    2.20
   8  -1   0   44.10    5.30
  -8  -1   0   56.99    6.40
   8  -1   0   50.89    5.40
  -8  -1   0   67.19    6.90
  -8  -1   0   58.79    5.90
   8  -1   0   56.49    5.40
  -8   1   0   53.39    6.30
   8   1   0   42.10    5.00
  -8   1   0   54.49    5.80
  -8   1   0   43.00    4.90
   8   1   0   49.10    6.30
   8   1   0   46.70    5.30
  -9  -1   0   31.10    5.10
  -9  -1   0   20.80    4.40
   9  -1   0   23.00    4.10
   9  -1   0   21.90    4.50
  -9  -1   0   22.00    4.50
   9  -1   0   23.20    3.90
  -9   1   0   25.40    4.40
  -9   1   0   18.30    4.50
   9   1   0   20.60    4.30
   9   1   0   23.70    4.50
 -10  -1   0   16.90    4.40
 -10  -1   0   16.20    4.80
  10  -1   0   10.70    4.10
  10  -1   0   21.10    4.30
  10  -1   0   12.10    3.70
 -10  -1   0   15.00    4.70
 -10   1   0   17.90    4.70
 -10   1   0   20.50    5.00
  10   1   0   12.30    4.50
  11  -1   0   13.70    4.20
 -11  -1   0   16.00    4.70
 -11  -1   0   14.70    5.00
  11  -1   0   31.20    6.60
 -11   1   0   19.80    4.80
 -11   1   0   14.00    4.70
  11   1   0   22.70    5.50
  12  -1   0    1.80    3.50
  12  -1   0    3.80    3.70
 -12  -1   0   -0.20    3.40
 -12   1   0   -3.10    3.40
  12   1   0   -4.70    3.00
 -12   1   0   -4.20    2.80
  13  -1   0   21.40    6.10
  13  -1   0   24.90    6.20
  13   1   0   24.40    7.30
 -13   1   0   23.20    6.50
 -13   1   0   30.70    6.90
   0  -2   0  216.88    6.20
   0  -2   0  214.08    6.20
   0  -2   0  216.98    6.90
   0   2   0  223.48    6.20
   0   2   0  226.58    6.10
   1  -2   0  339.57   10.60
  -1  -2   0  365.26   10.40
  -1  -2   0  347.77   10.40
  -1  -2   0  334.67   10.40
   1   2   0  362.76   10.40
   1   2   0  339.07   10.20
   1   2   0  350.06   10.50
  -2  -2   0  965.70   27.30
  -2  -2   0  958.50   26.70
  -2  -2   0  941.01   27.20
   2  -2   0  945.01   26.50
   2   2   0  985.90   27.30
  -2   2   0  956.70   26.00
  -2   2   0  937.61   26.80
   2   2   0  965.00   26.80
  -2   2   0  964.50   26.10
  -3  -2   0  260.07    9.10
   3  -2   0  245.48    8.30
   3  -2   0  244.88    8.10
  -3  -2   0  260.27    8.70
  -3  -2   0  265.67    9.10
   3  -2   0  256.47    8.10
  -3   2   0  243.88    8.10
   3   2   0  247.08    9.00
  -3   2   0  248.68    8.70
  -3   2   0  262.07    8.20
   3   2   0  253.37    8.80
  -3   2   0  249.38    8.00
  -4  -2   0    0.60    1.70
  -4  -2   0    1.90    1.60
   4  -2   0    2.30    1.40
   4  -2   0    0.70    1.10
   4  -2   0    2.70    1.20
  -4  -2   0    2.50    1.50
   4   2   0    2.80    1.60
   4   2   0    2.10    1.60
   4   2   0    1.30    1.50
  -4   2   0    1.80    1.30
  -4   2   0    0.50    1.10
  -4   2   0    3.00    1.60
   5  -2   0  126.09    5.80
  -5  -2   0  132.69    6.60
  -5  -2   0  135.39    6.30
  -5  -2   0  130.29    6.70
   5  -2   0  123.79    5.70
   5  -2   0  127.49    6.10
   5   2   0  132.99    6.60
  -5   2   0  129.59    5.80
  -5   2   0  129.19    5.90
   5   2   0  137.69    6.60
   5   2   0  123.89    6.30
   5   2   0  129.89    6.70
  -5   2   0  140.89    6.60
   6  -2   0    6.90    2.00
  -6  -2   0   10.10    2.80
   6  -2   0   11.30    2.60
  -6  -2   0   14.10    3.00
  -6  -2   0    6.90    2.60
   6  -2   0   10.50    2.30
  -6   2   0   10.80    2.40
  -6   2   0   10.30    2.50
  -6   2   0    7.60    2.50
   6   2   0    3.60    1.70
   6   2   0   15.30    3.20
   6   2   0   14.10    3.00
   6   2   0   16.00    3.10
   7  -2   0    1.30    1.90
  -7  -2   0   -1.00    1.70
   7  -2   0    0.90    1.60
  -7  -2   0    2.70    2.20
  -7  -2   0    3.10    2.40
   7  -2   0    0.80    1.60
   7   2   0   -0.30    1.50
   7   2   0    0.00    1.60
   7   2   0   -0.80    1.40
  -7   2   0    3.80    2.10
  -7   2   0    2.50    2.00
  -7   2   0   -0.50    2.00
   8  -2   0   98.89    6.80
  -8  -2   0  100.79    7.10
  -8  -2   0  104.49    6.80
   8  -2   0  100.89    6.20
   8  -2   0   88.69    5.90
  -8  -2   0   76.69    7.40
  -8   2   0   85.19    6.10
  -8   2   0   91.39    6.30
   8   2   0  101.19    6.90
  -8   2   0   94.39    7.00
   8   2   0   94.69    7.00
   9  -2   0   20.20    4.70
  -9  -2   0   23.10    4.40
  -9  -2   0   24.70    4.90
   9  -2   0   25.00    4.00
   9  -2   0   25.20    4.00
  -9  -2   0   27.70    5.10
  -9   2   0   18.10    4.20
  -9   2   0   25.50    4.60
   9   2   0   14.00    4.00
 -10  -2   0   10.60    4.10
  10  -2   0    9.70    3.20
  10  -2   0    5.20    2.90
 -10  -2   0    8.80    3.30
 -10  -2   0    6.60    3.70
  10  -2   0   10.60    4.00
 -10   2   0    8.30    3.70
  10   2   0    7.50    3.80
 -10   2   0    5.50    3.70
 -11  -2   0   90.49   10.10
  11  -2   0   58.49    6.60
  11  -2   0   57.79    6.80
  11  -2   0   63.89    8.00
 -11   2   0   52.59    7.00
  11   2   0   74.99    9.60
 -11   2   0   48.50    7.50
  12  -2   0   44.30    7.20
  12  -2   0   57.29    7.10
 -12   2   0   56.19    8.40
  12   2   0   45.20    7.30
 -12   2   0   34.30    6.20
  13  -2   0   -0.60    3.80
  13  -2   0    0.60    4.40
 -13   2   0    2.70    4.30
 -13   2   0   -2.40    3.70
  13   2   0   -1.30    3.90
   0  -3   0   -0.20    0.60
   0  -3   0    1.30    0.80
   0  -3   0    0.50    1.10
   0   3   0    0.10    0.50
   0   3   0    0.50    0.50
   0   3   0    0.50    0.60
  -1  -3   0    0.80    0.90
   1  -3   0    3.20    1.40
  -1  -3   0    1.60    0.90
  -1  -3   0    1.50    1.10
   1  -3   0    2.40    1.10
   1   3   0    1.60    1.00
   1   3   0    2.00    1.00
   1   3   0    2.70    1.00
   2  -3   0 4459.55  123.39
  -2  -3   0 4613.04  129.39
  -2  -3   0 4645.24  129.39
   2  -3   0 4746.02  126.59
  -2  -3   0 4808.12  127.89
   2   3   0 4868.41  129.79
   2   3   0 4902.41  127.89
  -2   3   0 4766.02  124.79
   2   3   0 4709.03  125.99
  -3  -3   0   19.00    2.70
  -3  -3   0   25.90    2.80
  -3  -3   0   25.00    2.70
   3  -3   0   26.20    2.30
  -3   3   0   24.20    2.10
   3   3   0   23.90    2.80
   3   3   0   25.20    2.70
  -3   3   0   24.60    2.10
  -3   3   0   26.30    2.70
  -4  -3   0    0.20    1.50
  -4  -3   0    0.90    1.50
   4  -3   0    0.50    0.90
   4  -3   0    0.40    0.90
  -4  -3   0   -1.10    1.40
   4  -3   0    1.90    1.30
  -4  -3   0    1.80    1.30
   4   3   0   -1.60    1.40
  -4   3   0   -0.30    1.10
   4   3   0   -0.10    1.30
  -4   3   0   -0.90    1.40
  -4   3   0    1.70    1.10
  -4   3   0   -0.20    1.00
   5  -3   0  137.49    5.70
  -5  -3   0  136.99    7.00
   5  -3   0  133.99    5.70
  -5  -3   0  141.89    6.60
  -5  -3   0  141.99    7.00
   5  -3   0  128.29    6.20
   5   3   0  138.29    6.80
  -5   3   0  134.39    6.60
  -5   3   0  142.29    6.10
  -5   3   0  133.79    5.70
   5   3   0  140.79    6.90
  -5   3   0  141.29    6.00
   5   3   0  156.68    7.40
  -6  -3   0  334.67   13.10
   6  -3   0  305.47   12.10
  -6  -3   0  320.47   12.40
   6  -3   0  351.16   11.60
   6  -3   0  318.27   11.30
  -6  -3   0  336.27   12.90
  -6   3   0  340.97   12.70
  -6   3   0  322.77   11.40
   6   3   0  344.57   12.70
  -6   3   0  316.87   11.60
  -6   3   0  351.06   12.10
   6   3   0  308.27   12.80
   6   3   0  320.77   13.00
   6   3   0  340.97   12.90
   7  -3   0   66.59    4.50
  -7  -3   0   70.09    6.30
  -7  -3   0   58.99    6.10
  -7  -3   0   59.29    6.00
   7  -3   0   60.59    5.80
   7  -3   0   62.39    4.50
  -7   3   0   59.29    5.00
  -7   3   0   58.29    5.90
   7   3   0   68.19    6.50
   7   3   0   74.19    7.20
   7   3   0   48.60    5.10
  -7   3   0   58.49    5.20
   8  -3   0   30.10    3.90
   8  -3   0   28.80    4.40
  -8  -3   0   33.00    5.00
  -8  -3   0   36.10    5.40
  -8  -3   0   27.80    4.90
  -8   3   0   25.50    4.60
   8   3   0   31.60    4.70
  -8   3   0   42.80    5.20
  -9  -3   0  119.39   10.20
  -9  -3   0   84.29    8.20
   9  -3   0  114.79    6.80
   9  -3   0  106.79    7.70
  -9  -3   0  108.69    7.70
   9  -3   0  107.49    6.70
   9   3   0   96.09    8.80
  -9   3   0  113.49    7.40
  -9   3   0   96.19    8.70
  10  -3   0   28.60    4.60
 -10  -3   0   26.40    5.20
  10  -3   0   22.30    5.30
 -10  -3   0   26.20    5.80
  10  -3   0   35.30    4.90
  10   3   0   34.00    6.10
 -10   3   0   17.80    4.40
 -10   3   0   21.10    5.00
  11  -3   0   24.90    4.70
  11  -3   0   16.70    4.10
  11  -3   0   18.50    5.50
 -11  -3   0   15.90    5.30
 -11   3   0   13.20    4.90
 -11   3   0   16.90    5.20
  11   3   0   14.90    5.60
  12  -3   0   36.40    5.60
  12  -3   0   38.50    7.10
  12  -3   0   35.90    5.30
 -12   3   0   28.20    6.40
 -12   3   0   37.60    6.70
  12   3   0   29.10    6.60
  13  -3   0   24.00    5.10
  13  -3   0   25.90    5.60
  13  -3   0   25.70    6.70
 -13   3   0   22.00    5.60
  13   3   0   23.90    6.90
 -13   3   0   23.40    6.50
   0  -4   0    0.30    1.30
   0  -4   0    0.10    0.80
   0  -4   0   -0.90    0.90
   0   4   0    0.70    0.80
   0   4   0    0.10    0.70
   0   4   0   -0.30    0.70
   1  -4   0   23.70    2.70
   1  -4   0   20.90    2.20
  -1  -4   0   21.40    2.50
  -1  -4   0   22.90    2.20
  -1  -4   0   15.40    1.70
  -1  -4   0   20.80    1.90
   1   4   0   19.20    2.10
   1   4   0   15.40    1.80
   1   4   0   17.20    1.90
   2  -4   0   41.90    3.90
  -2  -4   0   48.30    3.30
  -2  -4   0   42.00    3.00
   2  -4   0   41.90    3.50
  -2  -4   0   43.40    3.00
   2   4   0   42.10    3.00
   2   4   0   44.00    3.20
   2   4   0   35.50    3.00
   3  -4   0  157.28    5.50
  -3  -4   0  160.58    6.90
  -3  -4   0  156.88    6.70
  -3  -4   0  152.68    6.30
  -3  -4   0  160.38    6.80
   3   4   0  157.08    6.80
  -3   4   0  164.28    5.40
   3   4   0  155.58    6.60
  -3   4   0  159.38    5.40
  -4  -4   0  162.28    7.40
  -4  -4   0  156.98    7.30
  -4  -4   0  156.58    7.30
   4  -4   0  158.98    6.20
  -4  -4   0  175.88    7.10
   4   4   0  157.18    7.30
  -4   4   0  166.28    6.90
  -4   4   0  170.88    6.10
  -4   4   0  155.08    5.90
   4   4   0  164.88    7.20
   5  -4   0  148.99    6.60
  -5  -4   0  151.08    7.70
  -5  -4   0  171.48    8.00
  -5  -4   0  167.98    7.40
  -5   4   0  161.28    5.90
  -5   4   0  147.59    6.30
   5   4   0  158.08    7.80
   5   4   0  155.38    7.60
  -5   4   0  159.58    7.30
  -5   4   0  166.18    6.60
   6  -4   0    6.80    2.20
  -6  -4   0    2.60    2.20
  -6  -4   0    6.10    2.30
  -6  -4   0    2.40    2.30
   6  -4   0    3.90    1.60
   6  -4   0    2.90    1.40
  -6   4   0    5.20    1.80
  -6   4   0    5.30    1.80
   6   4   0    4.90    2.80
  -6   4   0    2.60    1.60
   6   4   0    1.80    1.90
   6   4   0    2.80    2.00
  -6   4   0    6.10    2.40
   7  -4   0   68.59    5.30
  -7  -4   0   84.39    7.40
  -7  -4   0  106.99    7.00
   7  -4   0   78.29    4.60
   7  -4   0   67.79    4.30
   7   4   0   86.69    8.30
  -7   4   0   63.49    4.80
  -7   4   0   70.59    6.50
   7   4   0   77.69    5.80
  -8  -4   0    2.00    2.10
  -8  -4   0   -3.20    2.30
   8  -4   0    3.20    2.00
   8  -4   0    1.80    1.80
   8  -4   0    5.10    2.70
  -8   4   0    3.60    2.60
  -8   4   0    1.50    2.10
   8   4   0    1.10    2.30
   9  -4   0   65.29    5.60
   9  -4   0   63.79    7.20
   9  -4   0   66.19    5.50
  -9  -4   0   64.69    8.10
  -9  -4   0   53.09    6.20
  -9   4   0   58.69    6.70
   9   4   0   68.69    8.40
  -9   4   0   76.29    7.80
  10  -4   0    2.30    3.20
  10  -4   0    3.30    2.60
  10  -4   0    6.50    2.80
 -10  -4   0   -0.80    3.30
 -10   4   0    5.50    3.10
 -10   4   0    6.00    3.70
  10   4   0    3.40    3.80
 -11  -4   0   15.50    5.50
  11  -4   0   15.10    3.70
  11  -4   0   14.00    3.70
  11  -4   0   18.10    4.70
 -11   4   0   15.30    4.90
  11   4   0   22.60    6.30
 -11   4   0   13.10    4.50
  12  -4   0    7.00    3.40
  12  -4   0   10.80    4.90
  12  -4   0    4.30    3.40
 -12   4   0    8.80    5.00
  12   4   0    1.00    4.10
 -12   4   0    5.90    4.20
  13  -4   0    0.00    3.30
  13  -4   0   -3.30    4.30
  13  -4   0    0.70    3.30
 -13   4   0   -0.20    3.90
 -13   4   0   -3.10    4.10
  13   4   0   -3.10    3.30
   0  -5   0    0.20    1.40
   0  -5   0   -0.10    0.80
   0  -5   0   -0.10    1.00
   0   5   0   -0.20    0.90
   0   5   0    0.50    0.80
   0   5   0   -0.30    0.70
  -1  -5   0   13.80    1.60
   1  -5   0   15.90    2.50
  -1  -5   0   15.00    1.60
  -1  -5   0   15.00    2.50
   1  -5   0   18.70    2.30
  -1  -5   0   14.60    1.70
  -1  -5   0   14.40    2.00
   1   5   0   17.10    2.00
   1   5   0   17.50    2.00
   1   5   0   14.70    1.90
   1   5   0   16.20    2.10
   2  -5   0   14.20    2.60
  -2  -5   0   10.60    1.90
   2  -5   0   12.20    2.20
  -2  -5   0   11.10    1.90
  -2  -5   0   10.80    2.10
   2   5   0   10.40    1.90
   2   5   0   13.30    2.10
   2   5   0   20.00    2.60
  -3  -5   0   28.20    3.20
  -3  -5   0   27.10    3.30
  -3  -5   0   22.10    3.10
   3   5   0   26.10    3.10
   3   5   0   16.90    2.70
   4  -5   0  103.09    4.50
  -4  -5   0  103.79    5.70
  -4  -5   0  100.79    5.90
  -4  -5   0  100.69    5.70
  -4  -5   0  103.29    5.40
  -4   5   0  103.99    4.40
  -4   5   0  107.19    4.40
   4   5   0  108.59    5.90
  -4   5   0   97.89    5.20
   4   5   0  103.99    5.70
  -5  -5   0   27.60    4.00
  -5  -5   0   24.90    3.50
   5  -5   0   22.90    2.90
  -5  -5   0   19.10    3.40
  -5  -5   0   25.40    3.70
   5   5   0   24.40    3.60
   5   5   0   30.10    4.10
  -5   5   0   25.90    3.40
  -5   5   0   25.00    2.80
  -6  -5   0  102.39    6.80
  -6  -5   0  104.39    7.30
  -6  -5   0  104.59    6.80
   6  -5   0   95.09    5.50
  -6  -5   0   91.99    5.90
  -6   5   0   97.59    5.20
   6   5   0  117.99    6.90
  -6   5   0   95.09    5.20
   6   5   0  108.19    6.60
  -6   5   0   96.99    6.10
  -7  -5   0   37.40    4.60
   7  -5   0   32.50    4.30
  -7  -5   0   43.60    5.80
   7   5   0   31.80    4.60
  -7   5   0   39.80    4.20
   7   5   0   56.89    6.30
  -7   5   0   28.90    4.50
  -8  -5   0   27.40    4.10
   8  -5   0   28.80    4.50
  -8  -5   0   29.20    5.30
   8   5   0   29.90    5.00
  -8   5   0   31.60    5.10
  -8   5   0   30.30    4.00
   9  -5   0   17.10    4.20
  -9  -5   0   18.00    4.80
  -9   5   0   21.50    3.90
  -9   5   0   16.40    4.30
   9   5   0   27.70    5.90
  10  -5   0   17.40    4.60
 -10  -5   0   24.90    6.00
 -10   5   0   21.60    4.70
  10   5   0   12.40    4.10
 -10   5   0   23.50    5.50
 -11  -5   0   -0.90    4.00
  11  -5   0    3.20    4.20
 -11   5   0    2.20    3.30
  11   5   0    1.70    3.60
 -11   5   0    0.50    3.60
  12  -5   0   25.20    6.50
 -12  -5   0   23.20    6.70
 -12   5   0   14.30    5.60
 -12   5   0   27.20    5.80
  12   5   0   16.70    5.70
  13  -5   0   13.30    5.60
  13   5   0    2.10    4.50
 -13   5   0    1.60    4.30
 -13   5   0   -2.10    4.50
   0  -6   0  178.28    6.30
   0  -6   0  192.88    6.60
   0  -6   0  181.58    7.90
   0   6   0  185.28    6.20
   0   6   0  198.98    6.20
   0   6   0  197.48    6.60
  -1  -6   0   50.39    2.70
  -1  -6   0   49.30    4.50
  -1  -6   0   46.00    2.70
  -1  -6   0   51.89    2.70
   1  -6   0   55.99    4.00
  -1  -6   0   45.00    3.10
   1  -6   0   46.40    3.30
   1   6   0   49.20    3.00
   1   6   0   54.79    3.10
   1   6   0   54.29    3.30
   1   6   0   49.40    2.80
  -2  -6   0    7.20    1.60
  -2  -6   0    8.60    2.10
   2  -6   0    6.70    1.90
   2  -6   0   10.90    2.60
  -2  -6   0    5.20    1.60
   2   6   0   10.80    2.40
   2   6   0    6.70    1.70
   2   6   0    9.60    2.00
  -3  -6   0   46.70    4.30
  -3  -6   0   49.70    4.30
  -3  -6   0   51.09    3.80
   3   6   0   48.80    4.50
   3   6   0   48.40    4.20
   3   6   0   52.89    4.60
   4  -6   0  788.62   22.70
  -4  -6   0  798.62   24.90
  -4  -6   0  771.02   24.80
  -4  -6   0  777.82   24.80
  -4   6   0  808.32   22.30
  -4   6   0  793.32   22.40
   4   6   0  804.72   24.80
   4   6   0  761.22   24.40
  -5  -6   0   24.00    3.70
  -5  -6   0   21.00    3.70
  -5  -6   0   18.40    3.20
  -5  -6   0   16.30    2.90
   5   6   0   14.60    3.10
  -5   6   0   25.90    2.80
  -5   6   0   19.80    2.40
  -5   6   0   16.30    3.00
   5   6   0   19.40    3.40
  -6  -6   0    3.50    2.60
   6  -6   0    0.30    1.70
  -6  -6   0    0.40    1.60
  -6  -6   0    1.20    1.90
   6   6   0    3.50    2.30
  -6   6   0    0.40    1.80
   6   6   0    3.00    2.30
  -6   6   0    4.60    1.70
  -6   6   0    0.90    1.50
   7  -6   0  136.99    7.30
  -7  -6   0  148.99    8.90
  -7   6   0  141.09    7.00
   7   6   0  137.39    8.60
   7   6   0  165.58    8.80
  -7   6   0  147.99    8.20
   8  -6   0   82.39    6.20
  -8  -6   0   91.19    8.70
  -8   6   0   77.69    7.30
   8   6   0   96.29    9.50
  -8   6   0   85.39    5.90
   8   6   0   98.49    8.90
   9  -6   0   43.00    5.90
  -9  -6   0   38.50    6.50
  -9   6   0   50.69    6.60
  -9   6   0   30.80    4.60
   9   6   0   38.30    6.60
 -10  -6   0   13.10    4.80
  10  -6   0   15.20    4.50
 -10   6   0   24.30    4.50
  10   6   0   14.10    4.70
 -10   6   0   29.60    5.70
 -11  -6   0   20.70    6.30
  11  -6   0   33.80    6.70
  11   6   0   19.90    5.60
 -11   6   0   31.60    5.60
 -11   6   0   29.50    6.50
  12  -6   0   10.70    5.10
 -12  -6   0    3.40    4.90
  12   6   0    3.00    4.90
 -12   6   0   13.90    4.70
 -12   6   0    9.90    5.30
  13  -6   0    4.60    5.50
 -13   6   0    7.80    5.00
  13   6   0    7.30    5.10
 -13   6   0   10.80    5.80
   0  -7   0   -0.60    1.20
   0  -7   0    0.10    1.60
   0  -7   0    0.50    1.10
   0   7   0    0.30    0.90
   0   7   0    1.00    1.00
   0   7   0    0.60    1.20
  -1  -7   0    8.70    1.90
   1  -7   0    4.30    2.20
  -1  -7   0    8.30    2.50
   1  -7   0    7.40    2.10
  -1  -7   0    7.20    1.50
   1   7   0   10.80    1.80
   1   7   0    7.60    1.70
   1   7   0    7.00    1.90
   1   7   0    7.60    1.40
   2  -7   0    5.70    2.20
  -2  -7   0    2.10    1.50
  -2  -7   0    3.30    1.90
  -2  -7   0    5.50    2.30
  -2  -7   0    3.60    1.50
   2  -7   0    4.80    2.10
   2   7   0    3.80    1.50
   2   7   0    5.00    1.70
   2   7   0    5.20    2.10
   2   7   0    4.30    1.70
   3  -7   0   86.49    6.00
  -3  -7   0   99.99    5.70
  -3  -7   0   90.99    5.20
  -3  -7   0  102.09    5.30
   3   7   0   94.89    5.20
   3   7   0   93.69    5.60
   3   7   0   92.49    5.30
  -4  -7   0   13.50    3.00
  -4  -7   0   16.90    3.10
  -4  -7   0   11.10    2.50
  -4   7   0   12.60    1.70
   4   7   0   14.50    2.80
   4   7   0   13.50    2.90
  -5  -7   0   77.79    5.70
  -5  -7   0   76.89    5.70
  -5  -7   0   83.49    5.30
   5  -7   0   78.09    4.30
  -5  -7   0   85.89    6.20
  -5   7   0   76.49    4.10
   5   7   0   78.19    6.50
  -5   7   0   81.09    5.20
   5   7   0   85.59    5.80
  -5   7   0   79.19    4.10
  -6  -7   0    1.20    2.30
  -6  -7   0    7.30    3.10
   6  -7   0    8.30    2.20
  -6   7   0    8.80    2.20
  -6   7   0    7.40    2.10
   6   7   0    4.50    2.60
  -6   7   0    5.30    2.50
   6   7   0    2.30    2.50
   7  -7   0    8.50    2.80
  -7  -7   0    8.20    3.40
  -7   7   0    6.00    2.80
   7   7   0    2.20    2.60
   7   7   0    7.80    3.20
  -7   7   0    5.90    2.30
   8  -7   0  201.98    9.60
  -8  -7   0  196.48   11.20
  -8   7   0  191.58    9.00
  -8   7   0  211.38   10.50
   8   7   0  183.28   10.90
   8   7   0  194.38   10.80
   9  -7   0   31.20    5.10
  -9  -7   0   23.00    5.80
   9   7   0   31.50    6.30
  -9   7   0   22.70    4.30
  -9   7   0   17.00    4.70
 -10  -7   0    8.90    4.70
  10  -7   0    4.60    3.40
  10   7   0    3.00    4.00
 -10   7   0    5.00    3.00
 -10   7   0   -1.30    3.60
  11  -7   0    0.20    3.50
 -11  -7   0   -4.50    3.40
 -11   7   0    3.50    3.50
 -11   7   0   -6.00    3.60
  11   7   0   -1.10    3.50
  12  -7   0    3.30    4.20
 -12  -7   0   -3.40    4.50
  12   7   0    4.30    4.50
 -12   7   0   -2.80    4.00
 -12   7   0   -0.70    3.60
  13  -7   0    0.00    4.70
  13   7   0   -6.40    4.00
   0  -8   0  234.88    8.30
   0  -8   0  232.88    8.10
   0  -8   0  227.18   10.00
   0   8   0  234.48    8.30
   0   8   0  229.68    7.90
   0   8   0  245.48    7.90
   1  -8   0   29.90    3.40
  -1  -8   0   32.60    3.20
  -1  -8   0   32.10    2.80
   1  -8   0   27.40    4.00
  -1  -8   0   26.40    4.10
   1   8   0   26.10    2.80
  -1   8   0   33.30    2.20
   1   8   0   24.30    3.10
   1   8   0   27.40    2.80
   2  -8   0   24.10    4.00
   2  -8   0   28.10    3.60
  -2  -8   0   25.20    2.70
  -2  -8   0   25.30    4.10
  -2  -8   0   26.30    2.70
  -2  -8   0   24.40    3.30
   2   8   0   29.60    3.60
   2   8   0   24.30    3.10
   2   8   0   18.10    2.50
   2   8   0   23.70    3.00
  -3  -8   0   65.09    4.80
  -3  -8   0   65.19    4.50
   3  -8   0   71.49    6.90
  -3  -8   0   69.99    4.70
   3   8   0   63.89    4.40
   3   8   0   67.09    5.00
   3   8   0   74.09    4.90
  -4  -8   0    1.30    2.00
  -4  -8   0    4.80    2.20
  -4  -8   0    4.20    1.90
   4   8   0    1.90    2.00
   4   8   0    1.20    2.00
  -5  -8   0   65.29    6.30
  -5  -8   0   75.09    6.50
  -5  -8   0   65.99    5.80
   5  -8   0   75.19    4.00
   5   8   0   84.29    7.30
   5   8   0   74.29    6.70
  -5   8   0   70.99    3.90
  -5   8   0   76.89    5.20
  -5   8   0   72.89    3.90
  -6  -8   0   -1.00    2.20
   6  -8   0   -1.90    1.70
  -6  -8   0   -1.20    2.60
   6   8   0   -3.60    2.00
  -6   8   0   -0.80    1.40
   6   8   0   -0.10    2.40
  -6   8   0    0.50    1.50
  -6   8   0    1.90    2.20
   7  -8   0   11.60    2.90
  -7  -8   0   20.20    4.40
   7   8   0   14.20    4.00
  -7   8   0   15.90    2.70
   7   8   0   16.20    4.30
  -7   8   0   22.40    4.00
   8  -8   0   24.60    4.20
  -8  -8   0   22.30    5.40
  -8   8   0   24.20    3.80
   8   8   0   24.00    5.20
  -8   8   0   23.20    4.60
   8   8   0   31.40    5.50
  -9  -8   0   -0.10    4.00
   9  -8   0    0.40    2.90
  -9   8   0    2.30    2.60
   9   8   0    2.20    3.50
  -9   8   0    5.10    3.70
 -10  -8   0    8.60    4.90
  10  -8   0    1.40    3.50
  10   8   0    0.00    3.50
 -10   8   0    1.30    3.80
 -10   8   0    2.30    2.90
  11  -8   0    4.10    4.00
 -11  -8   0   10.00    5.10
 -11   8   0   15.50    5.30
  11   8   0    4.10    4.50
 -11   8   0    4.60    3.70
 -12  -8   0   52.79    9.60
  12  -8   0   74.39    9.30
  12   8   0   42.30    8.30
 -12   8   0   59.59    8.00
 -12   8   0   59.29    8.90
   0  -9   0    1.60    1.60
   0  -9   0   -1.60    1.20
   0  -9   0    0.30    2.00
   0   9   0   -0.50    1.20
   0   9   0    0.30    1.10
   0   9   0   -1.70    1.40
   1  -9   0  173.08    9.00
   1  -9   0  194.48    7.90
  -1  -9   0  189.98    9.30
  -1  -9   0  200.78    7.00
  -1  -9   0  181.68    7.60
   1   9   0  191.58    7.90
   1   9   0  180.78    7.40
   1   9   0  191.18    7.40
   2  -9   0  242.48   11.50
  -2  -9   0  267.07    9.70
  -2  -9   0  285.77   10.60
  -2  -9   0  263.57   11.70
   2  -9   0  281.47   10.60
  -2  -9   0  283.47    9.60
   2   9   0  283.67   10.20
   2   9   0  283.97   10.80
   2   9   0  263.87    9.50
   2   9   0  275.87   10.30
  -3  -9   0   89.29    6.50
  -3  -9   0  103.09    5.60
  -3  -9   0  100.39    5.50
  -3  -9   0   95.29    6.10
   3  -9   0   94.99    6.80
   3   9   0  101.69    5.90
   3   9   0  101.19    6.30
   3   9   0   91.69    5.40
  -4  -9   0    1.00    2.00
  -4  -9   0    4.10    2.20
  -4  -9   0    1.70    2.20
   4   9   0    3.90    2.20
   4   9   0    5.50    2.40
  -5  -9   0   68.09    6.10
  -5  -9   0   52.69    6.30
  -5  -9   0   46.90    5.10
   5   9   0   54.69    5.90
  -5   9   0   53.89    3.30
   5   9   0   63.59    6.50
   6  -9   0   51.59    4.40
  -6  -9   0   42.90    5.50
  -6  -9   0   39.20    5.70
  -6   9   0   43.30    3.90
   6   9   0   42.50    5.50
  -6   9   0   41.80    3.80
  -6   9   0   36.30    4.70
   6   9   0   53.29    6.30
  -7  -9   0    1.50    3.00
   7  -9   0    0.80    1.90
   7   9   0   -1.10    2.40
  -7   9   0    0.70    2.10
  -7   9   0    2.90    2.80
   7   9   0   -2.80    2.50
  -8  -9   0   63.69    8.10
   8  -9   0   73.49    6.50
   8   9   0   82.59    9.10
  -8   9   0   71.09    6.20
   8   9   0   59.79    7.40
  -8   9   0   66.59    7.20
  -9  -9   0  109.89   11.10
   9  -9   0  143.59    8.40
  -9   9   0  147.49    9.70
  -9   9   0  138.89    8.00
   9   9   0  138.09   10.20
 -10  -9   0   56.59    9.50
  10  -9   0   56.89    7.10
 -10   9   0   56.49    7.70
  10   9   0   41.60    7.00
 -10   9   0   53.69    6.30
  11  -9   0   -3.30    3.60
 -11  -9   0    0.30    4.20
 -11   9   0   -1.70    2.90
  11   9   0    0.80    3.80
 -11   9   0   -5.40    3.60
 -12  -9   0    8.80    5.80
  12  -9   0    9.80    5.00
  12   9   0   12.00    5.20
 -12   9   0    8.10    4.20
   0 -10   0    4.20    2.00
   0 -10   0    2.10    1.60
   0 -10   0    2.60    2.90
   0  10   0    5.60    1.60
   0  10   0    3.30    1.60
   0  10   0    5.90    2.00
  -1 -10   0   15.70    2.80
  -1 -10   0   21.40    4.10
   1 -10   0   15.10    2.20
  -1 -10   0   18.90    2.60
   1 -10   0   14.30    2.80
   1 -10   0   16.30    4.00
  -1  10   0   19.00    2.40
   1  10   0   12.50    2.40
   1  10   0   14.30    3.00
  -1  10   0   15.50    2.00
   1  10   0   20.40    2.90
   2 -10   0   68.79    7.20
  -2 -10   0   77.09    5.30
  -2 -10   0   81.79    7.60
   2 -10   0   85.19    5.60
   2  10   0   76.39    5.10
   2  10   0   72.89    5.00
   2  10   0   82.19    5.50
  -3 -10   0   17.80    3.50
  -3 -10   0   23.20    4.30
  -3 -10   0   18.50    3.10
  -3 -10   0   20.10    3.00
   3 -10   0   20.70    4.60
   3  10   0   28.80    4.30
   3  10   0   16.80    3.30
  -4 -10   0   30.10    3.90
  -4 -10   0   27.00    4.90
  -4 -10   0   23.00    4.30
  -4 -10   0   26.90    3.70
   4  10   0   24.50    3.90
   4  10   0   29.00    3.90
  -5 -10   0   47.90    5.90
  -5 -10   0   37.80    4.80
  -5 -10   0   42.80    4.90
   5  10   0   49.20    5.80
   5  10   0   42.50    5.10
  -6 -10   0  201.48   10.50
  -6 -10   0  210.68   10.80
  -6 -10   0  170.38   10.50
   6 -10   0  212.38    8.30
  -6  10   0  207.68    8.00
   6  10   0  209.78   10.60
   6  10   0  197.08   10.60
  -6  10   0  198.98    7.80
  -6  10   0  212.58    9.80
  -7 -10   0   54.79    7.20
  -7 -10   0   72.29    7.50
   7 -10   0   70.19    5.80
  -7  10   0   53.89    6.10
  -7  10   0   67.89    4.70
   7  10   0   69.19    8.10
   7  10   0   62.19    7.00
  -8 -10   0    4.80    4.10
   8 -10   0    6.10    3.00
   8  10   0    6.00    3.70
  -8  10   0    1.90    2.40
  -8  10   0    3.30    3.20
   8  10   0    0.70    3.40
   9 -10   0   16.00    4.10
  -9 -10   0    9.40    5.20
  -9  10   0   10.00    3.10
   9  10   0    5.70    4.20
  10 -10   0   -1.50    3.30
 -10 -10   0    5.30    4.90
 -10  10   0    3.80    3.00
  10  10   0    4.80    4.50
  11 -10   0    5.60    4.50
 -11 -10   0    0.80    4.70
 -11  10   0   12.90    4.30
  11  10   0   14.30    5.60
  12 -10   0    7.30    5.10
 -12 -10   0    1.90    4.30
 -12  10   0    4.00    3.70
   0 -11   0   -1.10    1.70
   0 -11   0    0.50    2.80
   0 -11   0   -1.60    1.70
   0  11   0    1.50    1.50
   0  11   0   -0.50    1.80
   0  11   0   -1.50    1.30
  -1 -11   0  122.89    5.70
   1 -11   0  125.59    8.30
   1 -11   0  123.89    5.50
  -1 -11   0  128.99    6.50
  -1 -11   0  124.29    8.20
   1 -11   0  119.89    6.50
   1  11   0  130.19    6.20
  -1  11   0  115.49    5.20
  -1  11   0  116.09    5.20
   1  11   0  109.19    6.00
  -1  11   0  127.09    5.50
   1  11   0  128.09    6.60
  -2 -11   0  140.39    9.00
   2 -11   0  163.48    8.00
   2 -11   0  144.89    9.00
  -2 -11   0  151.48    7.70
   2  11   0  144.19    7.40
   2  11   0  162.78    8.00
   3 -11   0   85.59    8.20
  -3 -11   0   84.89    8.30
  -3 -11   0   87.49    5.40
  -3 -11   0   92.79    5.40
  -3 -11   0   87.09    6.30
   3  11   0  107.49    6.90
   3  11   0   90.39    6.20
  -4 -11   0    5.40    2.90
  -4 -11   0    3.40    2.40
  -4 -11   0    4.20    3.20
  -4 -11   0    2.40    2.20
   4  11   0    5.30    2.90
  -5 -11   0  135.19    8.10
  -5 -11   0  135.99    8.80
  -5 -11   0  142.69    8.30
   5  11   0  169.88    9.30
  -6 -11   0  125.19    8.90
  -6 -11   0  128.59    8.40
  -6 -11   0  127.69    8.40
   6  11   0  132.99    8.90
  -6  11   0  115.19    7.70
  -7 -11   0   20.80    5.30
  -7 -11   0   22.20    4.70
   7 -11   0   22.80    3.50
   7  11   0   22.00    5.10
  -7  11   0   18.20    3.10
  -8 -11   0  115.99   11.00
   8 -11   0  117.09    7.10
   8  11   0  114.69   10.20
  -8  11   0  119.39    6.70
   9 -11   0  102.09    7.30
  -9 -11   0  110.69   11.50
  -9  11   0   87.99    6.40
 -10 -11   0   55.19    8.40
  10 -11   0   65.69    7.10
 -10  11   0   62.69    6.50
 -11 -11   0   -3.00    4.70
  11 -11   0    0.90    3.90
 -11  11   0    3.40    3.30
   0 -12   0  123.39    6.20
   0 -12   0  106.29    8.20
   0 -12   0  126.09    6.60
   0  12   0  133.09    6.60
   0  12   0  133.49    6.10
   0  12   0  124.39    6.00
  -1 -12   0   43.30    4.70
   1 -12   0   40.40    6.20
   1 -12   0   59.89    5.50
   1 -12   0   43.20    3.90
  -1 -12   0   55.19    4.60
  -1 -12   0   42.80    6.30
   1  12   0   52.19    5.20
  -1  12   0   51.89    4.30
   1  12   0   47.10    4.60
  -1  12   0   52.29    3.70
  -1  12   0   45.40    3.80
   2 -12   0    2.10    3.20
  -2 -12   0    4.20    2.50
  -2 -12   0    4.90    3.60
   2  12   0    5.40    2.40
   2  12   0   -0.70    2.50
   3 -12   0   37.80    6.20
  -3 -12   0   39.40    5.10
  -3 -12   0   43.80    6.40
   3  12   0   52.89    5.90
   3  12   0   47.00    5.20
  -4 -12   0   14.70    3.30
  -4 -12   0    6.20    2.70
  -4 -12   0    5.80    3.10
  -4 -12   0   14.60    4.30
   4  12   0   12.50    3.80
  -5 -12   0   24.60    4.30
  -5 -12   0   32.30    4.60
  -5 -12   0   42.60    6.70
  -5 -12   0   33.10    5.40
   5  12   0   22.40    4.90
  -6 -12   0   87.99    7.70
  -6 -12   0   68.29    7.60
  -6 -12   0   88.19    7.80
   6  12   0   74.39    7.80
  -7 -12   0  151.38    9.70
  -7 -12   0  104.69   10.40
  -7  12   0  129.49    6.40
   7  12   0  130.39    9.80
   8 -12   0   44.40    4.90
  -8 -12   0   43.20    7.30
   8  12   0   50.59    7.60
  -8  12   0   33.40    4.10
   9 -12   0    0.40    3.10
  -9 -12   0    3.80    4.70
  -9  12   0    0.70    2.50
 -10 -12   0   14.10    5.90
  10 -12   0    7.90    4.20
 -10  12   0    2.60    3.30
 -11 -12   0   10.10    5.50
  11 -12   0   19.30    5.60
 -11  12   0   15.70    5.00
   0 -13   0    2.40    2.10
   0 -13   0   -2.30    3.20
   0 -13   0   -1.80    2.20
   0  13   0    2.90    2.40
   0  13   0   -1.30    1.90
  -1 -13   0   17.60    3.30
   1 -13   0   19.30    3.00
  -1 -13   0   17.50    5.20
   1 -13   0   13.60    4.50
   1  13   0   16.40    3.50
  -1  13   0   16.70    3.00
  -1  13   0   17.70    2.80
  -1  13   0   15.50    2.60
   1  13   0   13.80    3.00
  -2 -13   0    0.70    3.40
  -2 -13   0    6.70    3.10
   2 -13   0   10.90    4.30
   2  13   0    7.40    2.90
   2  13   0    9.50    3.40
   3 -13   0    2.80    3.60
  -3 -13   0    4.20    2.90
  -3 -13   0   12.20    4.60
   3  13   0    2.00    2.80
  -4 -13   0   29.00    6.00
  -4 -13   0   29.80    4.10
  -4 -13   0   27.60    4.90
  -4 -13   0   30.50    4.10
   4  13   0   33.10    5.20
  -5 -13   0   19.80    5.20
  -5 -13   0   28.80    5.40
  -5 -13   0   25.10    4.40
  -5 -13   0   24.50    4.50
   5  13   0   19.50    4.90
  -6 -13   0    7.20    4.60
  -6 -13   0    8.40    3.80
  -6 -13   0    8.00    3.70
  -6 -13   0   12.30    4.50
   6  13   0    8.20    4.00
  -7 -13   0   -1.00    3.50
  -7 -13   0   -1.30    3.40
  -7 -13   0    3.30    4.00
   7  13   0   -1.00    3.80
  -8 -13   0    8.30    5.20
   8  13   0   19.80    5.20
  -8  13   0   13.20    2.90
  -9 -13   0   12.70    5.60
  -9  13   0    5.20    2.90
 -10 -13   0    8.30    5.70
 -10  13   0   -1.00    2.80
   0 -14   0    3.10    3.30
   0 -14   0   -2.00    2.20
   0  14   0   -1.50    2.30
   0  14   0   -0.20    1.80
  -1 -14   0    8.30    4.40
  -1 -14   0   14.70    3.60
   1 -14   0    9.10    4.60
   1 -14   0   12.60    2.90
  -1  14   0    9.80    2.40
   1  14   0   13.50    3.20
  -1  14   0   12.20    3.30
   1  14   0   16.40    3.90
   2 -14   0    4.90    4.20
  -2 -14   0   -1.00    2.70
  -2 -14   0    0.50    3.60
   2  14   0   -2.50    2.90
   2  14   0   -2.90    2.00
   3 -14   0  100.49   10.50
  -3 -14   0   65.99    6.90
  -3 -14   0   71.79    8.90
   3  14   0   80.89    7.50
  -4 -14   0  147.49   10.50
  -4 -14   0  153.18    9.40
   4  14   0  142.29    9.20
  -5 -14   0   34.00    4.90
  -5 -14   0   38.80    7.20
  -5 -14   0   27.60    4.40
  -5 -14   0   17.40    4.70
   5  14   0   19.30    4.60
  -6 -14   0    4.20    3.80
  -6 -14   0    6.20    3.40
  -6 -14   0    2.10    3.80
  -6 -14   0    1.90    3.50
   6  14   0    1.20    3.40
  -7 -14   0   14.10    5.10
  -7 -14   0   22.50    5.10
  -7 -14   0   21.70    6.20
   7  14   0   25.70    6.00
  -8 -14   0   12.80    5.50
  -8 -14   0   10.80    5.20
   8  14   0   13.50    5.10
  -9 -14   0   -0.80    4.90
  -9  14   0    4.70    2.70
 -10 -14   0   -2.30    4.80
 -10  14   0   -0.90    2.60
   0 -15   0    2.50    2.70
   0 -15   0    1.60    3.80
   0  15   0    1.60    2.90
   0  15   0   -1.90    2.10
  -1 -15   0   17.00    6.00
   1 -15   0   15.20    3.20
   1 -15   0   12.80    5.30
  -1 -15   0   14.50    3.60
   1  15   0   21.10    4.50
  -1  15   0   14.10    2.80
   1  15   0   13.00    3.40
  -1  15   0   19.20    3.70
   2 -15   0   19.30    5.70
  -2 -15   0   19.40    5.60
  -2 -15   0   29.00    5.10
   2  15   0   17.20    3.80
  -3 -15   0   20.60    5.80
  -3 -15   0   19.50    4.50
   3 -15   0   24.20    5.90
   3  15   0   26.20    4.80
  -4 -15   0   49.40    6.70
  -4 -15   0   59.59    8.90
   4  15   0   40.80    5.90
  -5 -15   0   91.79   10.60
  -5 -15   0   78.39    8.50
  -5 -15   0   85.49    6.40
  -5 -15   0   79.39    6.70
   5  15   0   78.89    8.30
  -6 -15   0   15.40    4.60
  -6 -15   0    0.40    3.90
  -6 -15   0   14.70    4.10
  -6 -15   0   11.70    5.50
   6  15   0   20.40    4.70
  -7 -15   0    2.30    3.90
  -7 -15   0    2.60    4.40
  -7 -15   0    4.60    4.70
  -7 -15   0    2.90    4.20
   7  15   0   -0.30    4.30
  -8 -15   0    3.30    4.40
  -8 -15   0    0.50    4.50
  -8 -15   0   -2.30    3.80
   8  15   0    2.50    4.20
  -9 -15   0    1.30    4.90
  -9 -15   0    5.20    5.50
   0 -16   0   14.00    5.20
   0 -16   0   16.20    3.70
   0  16   0   22.70    4.50
   0  16   0   13.10    3.30
   1 -16   0    9.50    2.80
  -1 -16   0   -4.70    4.30
  -1 -16   0    0.30    2.80
   1 -16   0   -0.50    4.10
  -1  16   0    3.10    2.30
   1  16   0    2.60    3.30
   1  16   0    2.60    2.70
  -2 -16   0    0.90    3.00
   2 -16   0   -5.70    3.50
  -2 -16   0    5.70    4.60
   2  16   0   -1.10    2.50
   3 -16   0    4.30    4.80
  -3 -16   0   12.80    5.60
  -3 -16   0    9.30    3.90
   3  16   0    4.90    3.50
  -4 -16   0   -1.20    4.40
  -4 -16   0   -5.90    3.10
   4  16   0   -2.80    2.90
  -5 -16   0   -2.70    3.60
  -5 -16   0    1.90    4.50
   5  16   0    0.90    3.50
  -6 -16   0   -3.30    3.60
  -6 -16   0   -2.80    2.80
  -6 -16   0    2.60    3.80
  -6 -16   0   -5.40    3.90
   6  16   0   -1.60    3.50
  -7 -16   0    3.10    3.60
  -7 -16   0    0.20    4.00
  -7 -16   0   -0.70    3.90
  -7 -16   0    4.90    5.30
   7  16   0   -3.80    3.60
  -8 -16   0   -3.60    4.40
  -8 -16   0    0.30    4.90
  -8 -16   0    6.60    5.00
   8  16   0    4.60    4.50
   0 -17   0   -2.20    2.70
   0 -17   0    1.70    4.70
   0  17   0   -2.30    2.30
   0  17   0    4.60    3.60
  -1 -17   0   14.00    5.60
   1 -17   0   20.40    6.10
  -1 -17   0   16.60    4.30
  -1  17   0   23.10    3.60
   1  17   0   22.70    4.20
  -2 -17   0   25.50    6.70
   2 -17   0   26.20    6.90
  -2 -17   0   25.10    4.80
   2  17   0   29.30    4.80
  -3 -17   0    5.10    4.10
   3 -17   0   18.10    6.20
  -3 -17   0   12.40    5.50
   3  17   0   10.20    3.90
  -4 -17   0    2.30    5.10
  -4 -17   0   -0.40    3.70
   4  17   0   -1.80    3.10
  -5 -17   0   20.60    6.40
  -5 -17   0   18.60    5.40
   5  17   0   17.10    5.10
  -6 -17   0   18.40    6.40
  -6 -17   0   16.90    5.80
   6  17   0   23.70    5.80
  -7 -17   0    7.80    4.40
  -7 -17   0    2.90    3.70
  -7 -17   0   11.50    6.10
   7  17   0   11.30    5.40
   0 -18   0    5.50    3.60
   0 -18   0    3.10    4.90
   0  18   0    0.90    2.80
  -1 -18   0   23.70    4.90
  -1 -18   0   30.70    7.70
   1 -18   0   33.70    7.90
   1  18   0   24.00    4.50
  -1  18   0   21.20    3.70
   2 -18   0    3.40    5.20
  -2 -18   0   -0.60    3.60
  -2 -18   0    7.80    5.70
   2  18   0    3.60    3.60
  -3 -18   0    8.00    5.80
   3 -18   0    9.90    6.40
  -3 -18   0    1.30    4.00
   3  18   0    6.70    3.80
  -4 -18   0    7.30    4.70
  -4 -18   0    7.70    5.70
   4  18   0    6.90    3.80
  -5 -18   0    2.20    4.80
  -5 -18   0    2.40    5.00
   5  18   0   -0.80    3.50
  -6 -18   0   -1.30    4.40
  -6 -18   0   -2.10    5.10
   6  18   0   -6.20    3.60
   0 -19   0   -3.40    4.80
   0  19   0   -0.60    2.70
  -1 -19   0    2.30    4.90
  -1 -19   0    2.10    3.90
   1 -19   0    6.40    5.60
   1  19   0    0.20    3.10
  -1  19   0   -0.90    2.50
  -2 -19   0    1.60    5.20
  -2 -19   0    3.60    3.80
   2 -19   0   -4.00    4.70
   2  19   0    3.50    3.60
   3 -19   0    0.10    5.10
  -3 -19   0    4.20    4.50
  -3 -19   0   -2.10    4.70
   3  19   0   -2.30    3.10
  -4 -19   0    8.20    6.00
  -4 -19   0   -2.20    3.90
   4  19   0    2.50    3.90
   0 -20   0   31.60    8.40
   0  20   0   19.70    4.40
  -1 -20   0   20.00    7.50
   1 -20   0   14.90    6.80
   1  20   0    7.90    3.80
  -1  20   0    9.70    3.40
   2 -20   0    2.10    5.80
  -2 -20   0   -0.60    5.20
  -2 -20   0   -1.30    3.80
   2  20   0   -5.00    3.00
  13   0  -1   -0.30    4.10
 -13   0   1   -2.00    3.90
  12   0  -1    0.60    3.80
 -12   0   1    4.00    3.90
 -11   0   1   -0.50    2.60
 -11   0   1    1.90    3.30
  11   0  -1   -1.40    3.10
 -10   0   1   -1.10    2.80
  10   0  -1   -1.20    2.30
 -10   0   1    2.50    3.00
  10   0  -1   -0.60    2.70
  -9   0   1   -0.10    2.50
  -9   0   1    2.40    2.50
   9   0  -1   -1.00    2.10
   9   0  -1   -1.50    2.60
  -9   0   1    2.70    3.00
   8   0  -1   -0.80    1.60
   8   0  -1    1.10    2.30
   8   0  -1    1.00    1.90
  -8   0   1    1.20    2.40
  -8   0   1   -0.80    2.00
  -8   0   1    4.00    2.60
   7   0  -1   -0.10    1.60
   7   0  -1    0.40    1.90
  -7   0   1   -0.30    1.80
   7   0  -1   -1.50    1.30
  -7   0   1    1.30    2.10
  -7   0   1    0.40    2.10
   6   0  -1    0.90    1.70
   6   0  -1    1.00    1.50
  -6   0   1    0.30    1.70
  -6   0   1   -0.90    1.50
  -6   0   1    1.10    1.70
   6   0  -1   -0.30    1.40
   5   0  -1    1.80    1.60
   5   0  -1   -1.20    1.30
  -5   0   1   -1.80    1.30
  -5   0   1   -0.10    1.50
   5   0  -1    0.40    1.30
  -5   0   1    1.50    1.40
   4   0  -1    0.00    1.20
  -4   0   1   -0.80    1.20
   4   0  -1   -0.60    1.10
  -4   0   1    1.10    1.40
   4   0  -1    1.00    1.20
  -4   0   1    0.70    1.40
  -3   0   1   -0.10    1.20
  -3   0   1    1.20    1.20
   3   0  -1   -1.90    1.10
   3   0  -1   -1.80    1.00
  -3   0   1   -0.50    0.90
   3   0  -1    0.60    1.20
  -2   0   1    0.60    1.00
  -2   0   1    0.50    1.00
   2   0  -1    0.80    0.90
   2   0  -1    1.00    1.00
  -2   0   1    1.00    0.90
  -1   0   1    0.20    0.50
  -1   0   1   -0.40    0.50
   1   0  -1   -0.10    0.50
   0   0  -1   -1.10    0.20
   0   0   1   -0.20    0.40
  -1   0  -1   -0.80    0.60
   1   0   1   -0.30    0.60
   1   0   1   -0.60    0.50
  -1   0  -1   -0.50    0.60
   2   0   1    0.30    0.90
   2   0   1   -0.30    1.00
   2   0   1    0.40    0.90
  -2   0  -1   -0.80    1.00
  -2   0  -1   -1.40    0.70
  -2   0  -1    0.70    1.00
   2   0   1   -0.30    0.80
   3   0   1   -0.50    0.90
  -3   0  -1   -1.00    1.10
  -3   0  -1    1.80    1.50
   3   0   1   -1.50    0.90
  -3   0  -1    0.70    1.00
   3   0   1    0.80    1.20
   4   0   1    2.90    1.60
  -4   0  -1    0.40    1.50
   4   0   1   -0.10    1.10
  -4   0  -1    0.10    1.20
  -4   0  -1   -0.30    1.20
   4   0   1   -0.90    1.00
   5   0   1    0.80    1.20
  -5   0  -1    1.50    1.60
  -5   0  -1    0.60    1.50
   5   0   1    0.40    1.20
  -5   0  -1   -1.60    1.20
   5   0   1   -0.60    1.50
   6   0   1    1.20    1.50
   6   0   1   -0.90    1.20
  -6   0  -1   -1.00    1.60
  -6   0  -1   -0.60    1.60
   6   0   1    0.20    1.70
  -6   0  -1   -1.10    1.50
  -7   0  -1   -1.70    2.00
   7   0   1    0.90    1.60
   7   0   1    0.40    1.60
  -7   0  -1    0.50    1.90
   7   0   1   -1.40    1.90
  -7   0  -1   -0.70    1.70
   8   0   1   -1.60    2.00
   8   0   1    1.10    1.80
  -8   0  -1   -3.30    1.90
  -8   0  -1    0.20    2.00
   8   0   1    1.00    2.10
  -8   0  -1    1.00    2.40
  -9   0  -1    0.40    2.50
  -9   0  -1    2.00    2.90
   9   0   1    3.30    2.80
   9   0   1   -1.80    1.90
   9   0   1   -1.60    2.00
  -9   0  -1   -2.30    1.90
 -10   0  -1   -0.50    2.90
  10   0   1   -1.60    2.60
  10   0   1    0.50    2.60
 -10   0  -1   -3.30    2.30
  11   0   1    0.90    3.60
 -11   0  -1    2.30    3.80
 -11   0  -1   -0.10    2.90
  11   0   1   -1.10    2.90
 -12   0  -1    0.10    4.10
 -12   0  -1   -0.40    3.50
  12   0   1   -3.40    3.30
  13   0   1    3.30    4.60
 -13   0  -1   -1.60    3.30
 -13   0  -1    1.40    4.50
  13  -1  -1   -5.70    3.60
 -13   1   1   -6.30    3.50
  13   1  -1   -5.80    3.30
  12  -1  -1   50.19    8.50
  12  -1  -1   48.80    6.90
 -12  -1   1   52.89    7.70
  12   1  -1   45.50    8.10
 -12   1   1   55.29    7.40
 -12   1   1   33.90    6.80
 -11  -1   1   90.49    9.00
  11  -1  -1   89.09    8.50
  11  -1  -1   71.19    9.00
  11   1  -1   73.69    9.00
 -11   1   1   81.49    8.30
 -11   1   1   71.99    8.50
 -10  -1   1    7.40    3.60
  10  -1  -1    6.20    3.70
  10  -1  -1    6.20    3.00
 -10  -1   1    5.90    4.20
 -10  -1   1    7.90    3.50
 -10   1   1    5.90    3.10
 -10   1   1    8.80    3.80
  10   1  -1    5.60    3.50
   9  -1  -1    1.90    2.40
  -9  -1   1    5.70    3.20
   9  -1  -1    1.60    2.60
   9  -1  -1    2.20    2.40
  -9  -1   1    4.30    3.30
  -9  -1   1   -1.20    3.10
   9   1  -1    3.60    2.80
  -9   1   1    3.00    2.80
   9   1  -1    2.30    3.10
  -9   1   1    3.40    3.00
  -9   1   1   11.00    3.60
  -8  -1   1   80.39    7.50
  -8  -1   1   88.39    6.30
  -8  -1   1   86.09    6.50
   8  -1  -1   81.79    5.90
   8  -1  -1   79.59    5.80
   8  -1  -1   96.59    8.60
   8   1  -1   84.29    8.40
   8   1  -1   77.09    6.00
  -8   1   1   86.29    6.20
   8   1  -1   84.19    6.40
  -8   1   1   84.59    7.70
  -8   1   1   81.99    6.10
   7  -1  -1  318.17   12.20
  -7  -1   1  316.97   12.70
  -7  -1   1  302.97   12.90
  -7  -1   1  293.17   12.10
   7  -1  -1  296.37   12.50
   7  -1  -1  331.17   12.30
   7   1  -1  325.57   13.10
  -7   1   1  297.47   12.00
   7   1  -1  327.87   12.90
   7   1  -1  307.77   12.20
   7   1  -1  303.47   12.50
  -7   1   1  327.37   12.90
  -7   1   1  319.07   12.20
  -6  -1   1  357.96   13.40
  -6  -1   1  321.27   12.90
   6  -1  -1  349.07   13.10
   6  -1  -1  344.77   12.60
   6  -1  -1  353.56   12.70
  -6  -1   1  348.87   12.70
   6   1  -1  352.56   13.40
  -6   1   1  359.26   12.50
   6   1  -1  361.86   12.80
  -6   1   1  353.46   12.60
   6   1  -1  342.47   13.10
   6   1  -1  361.26   13.30
  -6   1   1  334.17   13.00
  -5  -1   1    9.70    2.30
  -5  -1   1    6.20    2.10
   5  -1  -1    2.40    1.50
   5  -1  -1    3.50    1.70
  -5  -1   1    5.60    1.90
   5  -1  -1    7.20    2.00
  -5   1   1    5.70    2.00
  -5   1   1    5.10    1.60
   5   1  -1    6.30    2.10
   5   1  -1    5.90    1.90
   5   1  -1    7.80    1.90
  -5   1   1    8.00    2.10
   5   1  -1    8.10    2.40
  -4  -1   1   51.69    3.50
   4  -1  -1   49.90    3.30
   4  -1  -1   50.79    3.40
   4  -1  -1   55.99    3.60
  -4  -1   1   49.70    3.70
  -4  -1   1   48.10    3.60
   4   1  -1   51.99    3.80
   4   1  -1   49.40    3.50
   4   1  -1   48.90    3.60
  -4   1   1   43.90    3.30
   4   1  -1   50.99    3.60
  -4   1   1   49.10    3.50
  -4   1   1   52.19    3.30
   3  -1  -1    9.20    1.70
  -3  -1   1    7.30    1.80
  -3  -1   1    9.80    1.80
   3  -1  -1    7.80    1.60
   3  -1  -1    7.70    1.50
  -3  -1   1   10.80    1.90
   3   1  -1    8.80    1.80
  -3   1   1   11.40    1.90
  -3   1   1   11.90    2.00
   3   1  -1    9.30    2.00
  -3   1   1   10.90    1.80
   2  -1  -1   28.50    2.10
  -2  -1   1   36.30    2.60
   2  -1  -1   28.80    2.20
  -2  -1   1   27.30    2.00
   2  -1  -1   24.20    1.90
  -2   1   1   24.60    1.90
   2   1  -1   30.80    2.50
  -2   1   1   30.60    2.20
  -2   1   1   26.50    1.90
   2   1  -1   26.00    2.10
   1  -1  -1  220.18    6.90
   1  -1  -1  223.78    6.90
  -1  -1   1  227.48    7.00
   1  -1  -1  228.38    6.80
  -1   1   1  232.48    6.70
   1   1  -1  246.08    7.00
   1   1  -1  221.48    6.90
  -1   1   1  231.58    6.80
   0  -1   1 1035.50   29.20
   0  -1   1 1058.19   29.20
   0  -1   1 1056.89   28.90
   0  -1   1 1052.29   28.20
   0  -1  -1 1095.99   29.20
   0   1   1 1105.49   29.20
   0   1   1 1077.69   28.70
   0   1  -1 1078.39   28.50
  -1  -1  -1  198.28    6.10
  -1  -1  -1  180.98    5.90
  -1  -1  -1  178.58    5.90
   1  -1   1  181.48    5.50
   1  -1   1  189.18    5.60
   1  -1   1  183.68    5.60
   1  -1   1  193.98    5.90
   1   1   1  182.78    6.10
  -1   1  -1  189.08    5.50
   1   1   1  194.78    6.10
  -1   1  -1  191.48    5.50
   1   1   1  191.28    6.00
  -2  -1  -1   94.89    4.30
   2  -1   1   99.89    3.70
   2  -1   1   99.89    3.90
  -2  -1  -1  100.89    4.30
  -2  -1  -1   98.39    4.00
   2  -1   1   92.39    4.00
   2  -1   1   94.49    3.70
  -2   1  -1  107.49    3.80
   2   1   1   96.29    4.10
   2   1   1  100.69    4.30
  -2   1  -1   98.99    3.70
   2   1   1  102.59    4.40
  -3  -1  -1  485.45   14.50
  -3  -1  -1  477.55   15.00
  -3  -1  -1  498.75   15.00
   3  -1   1  465.75   14.40
   3  -1   1  489.25   14.50
   3  -1   1  484.85   14.60
  -3   1  -1  483.95   14.30
   3   1   1  468.35   15.00
   3   1   1  443.16   14.50
  -3   1  -1  467.25   14.10
   3   1   1  445.86   14.90
   3   1   1  488.55   15.00
  -3   1  -1  481.95   14.90
  -4  -1  -1  479.85   15.40
  -4  -1  -1  442.16   14.60
   4  -1   1  461.45   14.60
   4  -1   1  462.65   14.60
  -4  -1  -1  474.85   15.10
   4  -1   1  454.25   14.80
   4   1   1  457.35   14.80
   4   1   1  469.75   15.20
   4   1   1  458.95   15.20
  -4   1  -1  453.55   14.50
  -4   1  -1  463.85   14.40
  -4   1  -1  454.95   15.10
   4   1   1  464.25   15.20
   5  -1   1    4.70    1.60
  -5  -1  -1    1.10    1.60
  -5  -1  -1    2.20    1.60
   5  -1   1    1.40    1.50
   5  -1   1    0.50    1.50
  -5  -1  -1    1.30    1.40
   5   1   1    2.80    1.50
  -5   1  -1    1.00    1.30
  -5   1  -1    0.40    1.70
   5   1   1    0.00    1.30
   5   1   1    1.60    1.60
   5   1   1    2.00    1.60
  -5   1  -1    2.70    1.70
   6  -1   1   15.30    2.70
   6  -1   1   12.40    2.40
  -6  -1  -1   12.00    2.90
  -6  -1  -1   11.40    2.70
   6  -1   1   14.70    3.00
  -6  -1  -1   12.30    3.00
  -6   1  -1   15.90    3.00
   6   1   1   18.90    3.10
  -6   1  -1   14.30    2.60
   6   1   1   14.00    2.80
   6   1   1   15.50    3.30
   6   1   1   11.10    2.30
  -6   1  -1   15.90    2.80
  -7  -1  -1   43.50    4.40
  -7  -1  -1   39.70    4.90
   7  -1   1   43.90    5.20
   7  -1   1   46.10    4.80
   7  -1   1   44.70    4.60
  -7  -1  -1   35.50    4.90
  -7   1  -1   42.10    4.80
   7   1   1   41.40    5.30
   7   1   1   32.60    4.30
   7   1   1   35.40    4.40
  -7   1  -1   41.50    4.50
  -7   1  -1   43.30    5.20
  -8  -1  -1  136.19    7.80
   8  -1   1  133.99    7.50
  -8  -1  -1  137.59    8.10
   8  -1   1  120.09    7.30
   8  -1   1  126.09    8.00
  -8  -1  -1  128.39    8.30
   8   1   1  125.89    8.20
   8   1   1  140.89    7.90
  -8   1  -1  140.69    8.50
   8   1   1  133.99    7.90
  -8   1  -1  123.69    7.40
  -8   1  -1  141.79    7.70
   9  -1   1   43.70    5.30
  -9  -1  -1   45.00    6.10
   9  -1   1   52.99    7.10
   9  -1   1   61.99    6.30
  -9  -1  -1   71.19    7.30
  -9  -1  -1   45.00    6.10
   9   1   1   53.79    6.10
  -9   1  -1   48.00    6.70
  -9   1  -1   43.20    5.50
   9   1   1   48.50    6.50
 -10  -1  -1   87.29    8.50
  10  -1   1   98.39    8.40
  10  -1   1   69.49    8.00
 -10  -1  -1   83.89    9.00
  10  -1   1   81.49    7.60
  10   1   1   73.99    9.10
  10   1   1  110.39   10.30
 -10   1  -1   76.89    7.50
 -10   1  -1   62.49    7.50
 -11  -1  -1   67.59    7.70
 -11  -1  -1   68.29    8.50
  11  -1   1   75.39    8.90
  11  -1   1   84.89    8.40
 -11   1  -1  100.89   10.20
  11   1   1   67.69    8.40
 -11   1  -1   66.69    8.60
 -12  -1  -1   40.90    7.40
  12  -1   1   53.99    7.20
  12  -1   1   51.19    8.30
 -12  -1  -1   43.80    7.90
 -12   1  -1   42.80    7.70
  12   1   1   45.30    7.80
 -12   1  -1   30.40    5.90
  13  -1   1    5.50    4.40
  13  -1   1    0.40    3.80
 -13   1  -1   -0.90    4.30
  13   1   1   -1.30    4.00
 -13   1  -1    2.80    4.70
  13  -2  -1   16.60    5.20
  13  -2  -1   16.90    5.10
 -13   2   1   10.90    5.30
  13   2  -1   19.50    5.90
  12  -2  -1   43.30    6.30
  12  -2  -1   37.60    7.10
 -12   2   1   28.20    6.50
 -12   2   1   22.60    5.30
  12   2  -1   26.10    6.00
 -11  -2   1    1.00    4.10
  11  -2  -1    0.20    2.80
  11  -2  -1    0.30    2.80
 -11  -2   1    0.20    2.50
  11  -2  -1    2.60    3.70
  11   2  -1   -2.00    3.10
 -11   2   1   -1.00    2.90
 -11   2   1    0.50    3.00
 -10  -2   1   17.00    5.10
  10  -2  -1    6.70    3.20
 -10  -2   1   13.00    4.00
  10  -2  -1    8.80    3.40
  10  -2  -1    5.70    3.70
 -10   2   1    9.20    3.90
  10   2  -1    8.70    4.30
   9  -2  -1  147.19    8.00
   9  -2  -1  135.49    8.70
  -9  -2   1  137.69    8.60
  -9  -2   1  121.09    8.60
   9  -2  -1  146.39    8.20
   9   2  -1  119.19    8.70
  -9   2   1  144.09    8.50
  -9   2   1  135.99    8.90
   8  -2  -1  142.09    7.50
  -8  -2   1  130.29    8.30
  -8  -2   1  140.29    8.00
   8  -2  -1  131.39    8.10
   8  -2  -1  135.89    7.50
  -8  -2   1  142.89    8.60
  -8   2   1  138.49    7.60
  -8   2   1  138.79    7.80
  -8   2   1  144.29    8.30
   8   2  -1  143.49    8.70
   8   2  -1  137.89    8.10
  -7  -2   1   26.00    3.70
  -7  -2   1   27.70    4.20
   7  -2  -1   24.80    3.40
   7  -2  -1   42.50    5.20
   7  -2  -1   30.60    3.80
  -7  -2   1   34.30    4.80
   7   2  -1   31.10    4.00
  -7   2   1   31.30    4.40
   7   2  -1   31.80    4.60
  -7   2   1   33.70    4.10
   7   2  -1   32.70    5.10
   7   2  -1   41.40    4.90
  -7   2   1   36.30    4.20
   6  -2  -1   20.50    3.40
   6  -2  -1   13.70    2.50
   6  -2  -1   15.30    2.60
  -6  -2   1   20.70    3.60
  -6  -2   1   22.30    3.60
  -6  -2   1   10.30    2.40
   6   2  -1   12.20    2.40
   6   2  -1   24.40    4.10
   6   2  -1   20.90    3.40
   6   2  -1   14.20    2.90
  -6   2   1   22.30    3.00
  -6   2   1   23.00    3.20
  -6   2   1   18.70    3.20
   5  -2  -1  280.47   10.60
   5  -2  -1  289.77   10.20
  -5  -2   1  293.27   11.10
  -5  -2   1  283.47   10.50
  -5  -2   1  291.67   11.10
   5  -2  -1  269.77   10.10
   5   2  -1  280.47   11.00
   5   2  -1  292.07   11.20
   5   2  -1  273.07   10.60
  -5   2   1  291.67   10.20
  -5   2   1  293.77   10.20
  -5   2   1  301.47   10.80
   5   2  -1  282.47   11.10
  -4  -2   1  251.97    9.50
   4  -2  -1  240.38    8.90
   4  -2  -1  248.28    8.70
   4  -2  -1  243.78    8.70
  -4  -2   1  251.57    9.10
  -4   2   1  255.57    9.10
   4   2  -1  253.17    9.30
  -4   2   1  259.87    8.70
  -4   2   1  246.08    8.70
   4   2  -1  255.07    9.60
   3  -2  -1    4.20    1.20
   3  -2  -1    4.90    1.20
  -3  -2   1    5.70    1.60
  -3  -2   1    6.10    1.80
   3  -2  -1    6.60    1.60
  -3   2   1    4.30    1.20
   3   2  -1    6.00    1.80
  -3   2   1    4.50    1.30
  -3   2   1    4.40    1.40
   3   2  -1    6.50    1.70
   2  -2  -1  131.19    4.70
   2  -2  -1  133.99    4.60
  -2  -2   1  136.29    5.30
   2  -2  -1  127.99    4.50
  -2  -2   1  133.49    5.30
   2   2  -1  140.69    5.20
  -2   2   1  131.69    4.70
  -2   2   1  126.29    4.50
  -2   2   1  139.69    4.80
   2   2  -1  140.69    5.30
  -2   2   1  132.79    4.60
   1  -2  -1  865.81   24.40
  -1  -2   1  898.01   24.90
  -1  -2   1  884.01   24.60
   1  -2  -1  898.81   24.50
  -1  -2   1  886.61   24.80
   1  -2  -1  840.22   24.80
   1  -2  -1  905.41   24.30
   1   2  -1  891.01   24.50
  -1   2   1  910.51   23.90
  -1   2   1  852.51   24.10
   1   2  -1  882.71   24.20
   0  -2   1   10.00    1.20
   0  -2  -1   11.90    1.10
   0  -2  -1   12.10    1.30
   0  -2  -1    9.20    1.00
   0  -2   1   14.00    1.60
   0   2   1   13.40    1.20
   0   2   1   11.70    1.20
   0   2   1   13.20    1.30
   1  -2   1    0.50    0.90
   1  -2   1   -0.20    0.90
  -1  -2  -1    0.20    0.70
  -1  -2  -1    0.80    0.80
  -1  -2  -1    1.10    1.00
   1   2   1    1.60    0.90
   1   2   1    2.20    0.90
   1   2   1   -0.50    0.90
  -2  -2  -1 1334.17   37.40
  -2  -2  -1 1365.56   38.00
   2  -2   1 1383.76   37.00
  -2  -2  -1 1414.36   38.30
   2  -2   1 1326.17   37.30
   2   2   1 1388.26   38.20
  -2   2  -1 1326.57   36.70
  -2   2  -1 1402.96   36.70
   2   2   1 1355.56   38.80
   2   2   1 1329.27   37.60
  -3  -2  -1   63.39    3.90
   3  -2   1   54.99    2.80
  -3  -2  -1   62.79    3.60
   3  -2   1   59.29    3.60
   3  -2   1   61.29    2.90
  -3  -2  -1   64.19    3.80
   3  -2   1   57.19    3.20
  -3   2  -1   59.69    3.00
  -3   2  -1   55.39    3.60
  -3   2  -1   60.89    3.10
  -3   2  -1   64.19    3.00
   3   2   1   56.99    3.60
   3   2   1   59.19    3.80
   3   2   1   58.59    3.80
  -4  -2  -1  213.58    8.30
   4  -2   1  189.28    7.10
   4  -2   1  200.68    7.20
   4  -2   1  192.68    7.50
  -4  -2  -1  192.08    7.80
   4   2   1  206.48    8.30
   4   2   1  197.38    7.90
  -4   2  -1  193.38    8.00
  -4   2  -1  190.48    7.10
   4   2   1  201.98    8.10
  -4   2  -1  219.88    7.50
  -4   2  -1  197.98    7.30
  -5  -2  -1  398.76   14.30
   5  -2   1  380.26   13.60
  -5  -2  -1  407.46   13.90
   5  -2   1  393.96   13.20
  -5  -2  -1  408.96   14.50
   5  -2   1  426.36   13.40
   5   2   1  383.86   14.30
  -5   2  -1  394.86   13.30
  -5   2  -1  416.76   14.30
   5   2   1  415.86   14.40
  -5   2  -1  392.26   13.10
   5   2   1  404.86   14.00
   5   2   1  424.36   14.50
  -6  -2  -1  672.93   22.40
  -6  -2  -1  687.53   21.70
   6  -2   1  646.44   21.60
   6  -2   1  681.53   21.10
   6  -2   1  672.53   21.10
  -6  -2  -1  660.93   21.90
   6   2   1  659.53   22.20
  -6   2  -1  675.33   22.20
   6   2   1  668.43   22.20
   6   2   1  670.83   22.30
  -6   2  -1  673.73   20.90
  -6   2  -1  662.83   21.00
   6   2   1  668.23   21.60
  -7  -2  -1   28.10    4.30
   7  -2   1   23.20    3.40
  -7  -2  -1   23.20    3.90
   7  -2   1   19.30    3.10
   7  -2   1   21.10    3.60
  -7  -2  -1   19.70    3.50
   7   2   1   27.80    4.60
   7   2   1   20.50    3.40
   7   2   1   33.00    4.40
  -7   2  -1   19.20    3.70
  -7   2  -1   29.40    3.90
   7   2   1   21.80    3.50
  -7   2  -1   25.10    3.60
   8  -2   1   19.80    4.30
   8  -2   1   25.10    4.00
  -8  -2  -1   30.30    4.80
  -8  -2  -1   21.10    4.50
  -8  -2  -1   25.70    4.30
   8  -2   1   23.00    3.70
  -8   2  -1   24.30    3.90
   8   2   1   22.80    4.30
  -8   2  -1   22.00    4.40
   8   2   1   23.20    3.90
   9  -2   1   47.20    5.40
  -9  -2  -1   26.80    5.10
  -9  -2  -1   43.60    5.40
   9  -2   1   43.30    6.10
  -9  -2  -1   48.00    6.30
   9  -2   1   43.40    5.10
  -9   2  -1   39.30    5.80
   9   2   1   43.00    6.10
  -9   2  -1   35.80    5.10
 -10  -2  -1  103.59    9.70
 -10  -2  -1  118.59    8.40
 -10  -2  -1  106.59   10.10
  10  -2   1  115.19    7.60
  10  -2   1  112.09   10.40
  10  -2   1  107.99    7.50
 -10   2  -1  114.39    8.20
 -10   2  -1  108.29   10.00
  10   2   1  121.99   11.50
  11  -2   1   57.69    6.50
 -11  -2  -1   62.79    8.40
  11  -2   1   76.69    9.70
 -11  -2  -1   45.60    7.10
  11  -2   1   68.99    7.40
 -11   2  -1   73.79    8.90
 -11   2  -1   51.29    7.50
  11   2   1   57.09    8.70
  12  -2   1   29.70    5.40
  12  -2   1   20.70    5.00
  12  -2   1   22.50    5.90
 -12  -2  -1   22.70    6.10
 -12   2  -1   16.70    4.90
 -12   2  -1   14.50    5.40
  12   2   1   13.20    5.60
  13  -2   1   28.60    6.10
  13  -2   1   26.10    7.00
  13   2   1    7.70    4.80
 -13   2  -1   14.60    5.60
 -13   2  -1   16.20    6.00
  13  -3  -1    5.50    4.90
  13  -3  -1    4.10    3.90
 -13   3   1    7.00    5.10
 -13   3   1    7.10    4.80
  13   3  -1   11.90    5.60
  12  -3  -1    6.20    3.90
  12  -3  -1   13.70    5.40
  12  -3  -1    9.90    3.90
 -12   3   1    9.60    4.70
  12   3  -1    6.50    5.10
 -12   3   1    2.20    3.80
  11  -3  -1    5.00    3.90
  11  -3  -1    6.00    3.40
 -11  -3   1    0.00    4.20
  11  -3  -1    1.70    3.00
 -11   3   1    6.40    4.10
 -11   3   1    5.20    3.40
  11   3  -1    3.10    3.80
 -10  -3   1   25.80    5.10
 -10  -3   1   31.30    5.90
  10  -3  -1   25.80    4.30
  10  -3  -1   29.20    5.40
  10  -3  -1   27.30    4.20
  10   3  -1   23.70    5.30
 -10   3   1   26.80    5.40
 -10   3   1   30.30    5.00
   9  -3  -1  152.68    8.00
   9  -3  -1  138.99    8.80
  -9  -3   1  141.19    9.50
   9  -3  -1  145.69    8.00
  -9  -3   1  167.38    9.40
  -9   3   1  158.78    9.50
  -9   3   1  171.98    9.00
   9   3  -1  136.49    9.30
  -8  -3   1   32.40    4.90
   8  -3  -1   28.70    3.90
   8  -3  -1   30.30    3.90
  -8  -3   1   38.80    5.40
   8  -3  -1   41.40    5.40
  -8   3   1   35.50    5.20
   8   3  -1   23.50    4.50
  -8   3   1   35.20    4.70
   7  -3  -1    3.60    2.30
   7  -3  -1    5.00    2.00
  -7  -3   1    1.70    2.30
  -7  -3   1    3.30    2.10
   7  -3  -1    1.80    1.90
   7   3  -1    5.00    2.60
  -7   3   1    2.70    2.00
   7   3  -1    2.30    2.40
  -7   3   1    3.80    2.00
  -7   3   1    1.90    2.20
   7   3  -1    5.70    2.50
   6  -3  -1    2.40    1.90
  -6  -3   1    2.60    1.80
  -6  -3   1    3.00    2.10
   6  -3  -1    0.10    1.40
   6  -3  -1    2.10    1.50
   6   3  -1    1.10    1.70
  -6   3   1    3.30    1.90
  -6   3   1   -0.20    1.60
   6   3  -1    1.60    1.70
  -6   3   1    1.90    1.60
   6   3  -1    2.60    1.60
   5  -3  -1   33.80    3.10
  -5  -3   1   27.30    3.60
  -5  -3   1   31.20    4.20
  -5  -3   1   39.10    4.20
   5  -3  -1   34.80    3.80
   5  -3  -1   29.50    2.90
   5   3  -1   35.90    4.60
  -5   3   1   25.00    3.30
   5   3  -1   27.00    3.40
  -5   3   1   29.90    3.10
  -5   3   1   36.50    3.60
  -5   3   1   35.60    3.30
   4  -3  -1   59.19    3.30
  -4  -3   1   64.49    4.40
  -4  -3   1   59.79    4.20
   4  -3  -1   60.59    3.30
   4  -3  -1   64.69    3.80
  -4  -3   1   64.29    4.00
  -4   3   1   65.19    3.60
  -4   3   1   71.89    3.70
   4   3  -1   67.79    4.40
  -4   3   1   60.99    3.40
   4   3  -1   64.59    4.20
  -4   3   1   69.69    3.90
  -3  -3   1  227.88    8.60
   3  -3  -1  235.58    7.90
  -3  -3   1  228.48    8.60
   3  -3  -1  232.28    7.50
   3  -3  -1  216.68    7.40
  -3  -3   1  231.38    8.80
  -3  -3   1  225.68    8.30
   3   3  -1  244.58    8.60
  -3   3   1  230.98    7.50
   3   3  -1  249.28    8.80
  -3   3   1  243.68    8.10
  -3   3   1  240.28    7.60
  -3   3   1  258.77    7.80
  -2  -3   1   96.49    4.60
  -2  -3   1  103.09    4.60
  -2  -3   1  107.49    4.70
  -2  -3   1  107.89    4.60
   2  -3  -1  109.79    4.00
  -2   3   1  113.29    3.90
  -2   3   1  112.59    3.90
   2   3  -1  109.89    4.70
   2   3  -1  102.69    4.50
  -2   3   1  104.89    4.00
  -1  -3   1    0.20    0.90
  -1  -3   1    1.40    0.90
  -1  -3   1    0.40    1.00
   1  -3  -1    2.50    0.80
   1  -3  -1    1.40    1.20
  -1  -3   1    0.90    0.90
   1   3  -1    0.70    0.90
  -1   3   1    2.00    0.70
   1   3  -1    1.60    0.90
  -1   3   1    2.60    0.80
   0  -3   1   36.20    2.90
   0  -3  -1   23.20    1.80
   0  -3  -1   24.50    1.60
   0  -3  -1   27.00    1.60
   0  -3   1   27.50    2.10
   0  -3  -1   33.80    2.70
   0   3   1   28.20    1.80
   0   3   1   23.80    1.70
   0   3   1   25.80    1.70
  -1  -3  -1   32.00    2.20
  -1  -3  -1   32.90    2.30
  -1  -3  -1   34.50    2.40
   1  -3   1   35.80    2.40
   1  -3   1   39.90    3.10
   1   3   1   37.70    2.50
   1   3   1   34.90    2.40
   1   3   1   33.10    2.30
   2  -3   1   34.20    3.20
  -2  -3  -1   34.60    3.10
  -2  -3  -1   36.20    3.00
  -2  -3  -1   28.90    2.60
  -2  -3  -1   39.50    3.10
  -2  -3  -1   35.60    3.20
   2   3   1   41.30    3.50
   2   3   1   34.00    3.00
   2   3   1   39.60    3.40
   3  -3   1  129.79    5.90
   3  -3   1  132.59    5.10
  -3  -3  -1  137.69    6.00
  -3  -3  -1  140.39    6.20
  -3  -3  -1  144.69    5.90
   3   3   1  131.59    5.90
   3   3   1  141.39    6.30
  -3   3  -1  132.99    4.90
   3   3   1  148.39    6.30
  -3   3  -1  143.49    5.00
  -4  -3  -1   10.50    2.50
  -4  -3  -1   16.10    2.80
   4  -3   1   14.50    2.20
  -4  -3  -1    8.60    2.30
   4  -3   1    6.90    1.30
  -4   3  -1   10.10    2.30
  -4   3  -1    9.90    1.80
  -4   3  -1   13.10    1.70
   4   3   1    7.70    2.10
  -4   3  -1    9.80    1.80
   4   3   1   11.70    2.70
  -5  -3  -1   66.89    4.90
   5  -3   1   73.59    3.70
  -5  -3  -1   59.49    5.20
   5  -3   1   56.19    4.00
  -5  -3  -1   61.19    4.30
   5  -3   1   59.79    3.50
  -5   3  -1   64.09    3.90
   5   3   1   64.49    4.80
  -5   3  -1   66.19    4.60
   5   3   1   66.99    4.60
   5   3   1   56.79    4.40
  -5   3  -1   63.59    3.90
  -5   3  -1   62.49    3.60
  -6  -3  -1   33.90    4.50
  -6  -3  -1   33.40    4.50
   6  -3   1   31.50    3.20
   6  -3   1   29.60    4.00
   6  -3   1   30.60    3.10
  -6  -3  -1   30.50    4.00
  -6   3  -1   37.90    3.90
  -6   3  -1   34.00    3.60
   6   3   1   38.10    4.90
  -6   3  -1   32.30    4.20
   6   3   1   28.50    3.80
  -6   3  -1   37.10    3.70
   6   3   1   47.80    5.00
   6   3   1   23.60    3.40
   7  -3   1  104.99    5.60
   7  -3   1  101.39    6.40
  -7  -3  -1   98.99    7.00
   7  -3   1  107.09    5.70
  -7  -3  -1  112.79    7.10
  -7  -3  -1  104.29    6.60
   7   3   1  109.19    7.30
  -7   3  -1  103.59    5.70
  -7   3  -1  108.09    6.90
  -7   3  -1  101.39    6.00
   7   3   1  124.49    7.30
   7   3   1  103.79    6.60
  -8  -3  -1   -0.70    1.70
   8  -3   1    0.40    1.80
  -8  -3  -1    0.20    2.30
   8  -3   1    3.60    2.20
  -8  -3  -1    1.90    2.70
   8  -3   1   -0.60    2.20
   8   3   1   -3.10    2.20
  -8   3  -1    0.80    2.50
  -8   3  -1    0.70    1.90
  -9  -3  -1    0.00    3.30
   9  -3   1    8.90    3.70
   9  -3   1    1.20    2.30
  -9  -3  -1    7.40    3.40
   9  -3   1    2.50    2.30
  -9  -3  -1    2.50    2.70
  -9   3  -1    6.00    3.30
  -9   3  -1    4.30    2.70
   9   3   1    0.00    3.00
 -10  -3  -1   -2.00    2.40
  10  -3   1   -0.50    2.80
  10  -3   1    1.20    2.50
  10  -3   1   -0.60    2.30
 -10  -3  -1   -0.60    2.90
 -10  -3  -1    1.50    3.40
  10   3   1    3.80    3.60
 -10   3  -1   -0.90    2.80
 -10   3  -1    1.90    3.40
 -11  -3  -1   20.90    6.30
  11  -3   1   24.80    6.20
  11  -3   1   21.70    4.30
  11  -3   1   21.90    4.30
 -11  -3  -1   19.70    5.60
 -11   3  -1   18.60    5.10
  11   3   1   22.70    6.10
 -11   3  -1   18.30    5.80
  12  -3   1    8.40    4.60
  12  -3   1    1.10    3.30
  12  -3   1    2.80    3.00
 -12   3  -1    3.20    3.90
 -12   3  -1    1.50    4.20
  12   3   1   -2.70    3.80
  13  -3   1    1.10    4.30
  13  -3   1   10.40    4.60
  13  -3   1    5.00    3.60
 -13   3  -1    5.80    4.80
  13   3   1   11.80    6.30
 -13   3  -1    9.60    4.80
  13  -4  -1   17.20    4.40
  13  -4  -1   22.40    6.70
  13  -4  -1   21.40    4.90
 -13   4   1   13.30    5.90
 -13   4   1    7.20    4.40
  13   4  -1    7.00    4.50
  12  -4  -1   53.49    6.30
 -12  -4   1   63.59    8.80
  12  -4  -1   57.79    6.60
  12  -4  -1   69.69    9.00
 -12   4   1   51.89    7.90
 -12   4   1   45.90    7.00
  12   4  -1   43.80    8.30
  11  -4  -1   20.40    5.50
  11  -4  -1   17.00    3.80
 -11  -4   1   18.70    5.70
  11  -4  -1   17.50    4.00
 -11   4   1   10.50    4.70
  11   4  -1   12.20    4.70
 -11   4   1   11.70    3.90
 -10  -4   1   18.00    5.50
  10  -4  -1   27.00    4.20
  10  -4  -1   25.70    5.20
 -10   4   1   28.70    5.40
  10   4  -1   38.60    7.00
 -10   4   1   22.50    5.20
  -9  -4   1   34.60    5.80
   9  -4  -1   13.50    3.20
   9  -4  -1   20.30    3.60
   9  -4  -1   17.90    4.40
  -9  -4   1   17.90    4.90
  -9   4   1   19.90    4.80
   9   4  -1   16.30    4.80
  -9   4   1   15.20    3.70
   8  -4  -1    3.70    2.00
   8  -4  -1    5.90    2.00
   8  -4  -1    6.50    3.00
  -8  -4   1    6.00    3.00
  -8  -4   1    4.90    3.00
   8   4  -1    5.00    3.20
  -8   4   1   10.50    3.20
  -8   4   1    6.00    2.80
  -7  -4   1   88.39    7.30
   7  -4  -1   56.99    5.60
  -7  -4   1   69.89    7.10
   7  -4  -1   68.39    4.50
   7  -4  -1   63.39    4.30
   7   4  -1   77.49    7.30
  -7   4   1   72.59    6.40
   7   4  -1   74.69    7.40
  -7   4   1   69.19    5.00
  -6  -4   1  187.08    9.10
   6  -4  -1  167.88    7.90
  -6  -4   1  180.18    8.80
  -6  -4   1  168.78    8.20
   6  -4  -1  182.58    7.10
  -6  -4   1  185.88    9.10
   6  -4  -1  169.78    6.90
  -6   4   1  174.98    7.10
   6   4  -1  174.98    8.80
  -6   4   1  186.28    8.30
  -6   4   1  179.38    7.70
   6   4  -1  190.58    8.70
  -6   4   1  183.78    7.70
   5  -4  -1  303.57   10.00
  -5  -4   1  317.57   12.00
  -5  -4   1  317.97   12.10
   5  -4  -1  298.97   10.00
   5  -4  -1  294.27   10.80
  -5  -4   1  292.87   11.70
  -5  -4   1  311.87   11.40
  -5  -4   1  321.97   12.10
  -5   4   1  298.77   10.50
  -5   4   1  318.37   11.20
  -5   4   1  299.77   10.00
   5   4  -1  294.57   11.50
  -5   4   1  311.67   10.60
  -4  -4   1  164.98    7.40
  -4  -4   1  169.48    7.30
  -4  -4   1  172.18    7.10
   4  -4  -1  166.88    6.50
  -4  -4   1  162.78    7.40
  -4  -4   1  161.68    7.40
   4   4  -1  166.88    7.30
  -4   4   1  169.78    6.30
  -4   4   1  152.58    5.70
  -4   4   1  158.38    6.10
  -4   4   1  153.98    6.50
   4   4  -1  172.78    7.60
  -3  -4   1   73.29    4.20
   3  -4  -1   70.79    3.40
  -3  -4   1   74.99    4.20
  -3  -4   1   69.69    4.30
  -3   4   1   74.99    3.40
  -3   4   1   71.29    3.30
  -3   4   1   73.79    3.60
   3   4  -1   70.69    4.20
   3   4  -1   67.59    4.10
  -2  -4   1 1174.58   33.60
  -2  -4   1 1154.28   33.80
   2  -4  -1 1163.38   32.50
  -2  -4   1 1215.28   33.80
   2   4  -1 1157.38   33.00
  -2   4   1 1184.28   32.10
   2   4  -1 1213.18   33.50
  -2   4   1 1197.08   32.00
   1  -4  -1  853.81   25.10
  -1  -4   1  791.12   24.20
  -1  -4   1  845.72   23.40
  -1  -4   1  855.51   25.20
  -1  -4   1  864.41   24.30
   1  -4  -1  881.81   23.80
  -1  -4   1  869.41   24.30
  -1   4   1  871.71   23.40
   1   4  -1  870.11   24.10
  -1   4   1  881.81   23.40
   1   4  -1  876.21   23.80
   1   4  -1  832.82   23.80
  -1   4   1  871.11   24.20
   0  -4  -1    7.40    1.70
   0  -4   1    6.30    2.00
   0  -4  -1    7.80    1.40
   0  -4   1    6.10    1.40
   0  -4  -1    4.60    1.00
   0  -4  -1    6.20    1.10
   0   4   1    8.10    1.30
   0   4   1    7.90    1.30
   0   4   1    5.90    1.20
   0   4   1    7.80    1.50
  -1  -4  -1  126.19    5.10
   1  -4   1  131.19    5.20
  -1  -4  -1  128.29    5.00
  -1  -4  -1  129.69    5.40
  -1  -4  -1  124.29    5.00
   1  -4   1  133.09    5.70
   1   4   1  123.29    5.20
   1   4   1  132.19    5.10
   1   4   1  132.39    5.00
  -2  -4  -1   25.50    2.70
   2  -4   1   34.80    3.50
   2  -4   1   25.50    2.70
  -2  -4  -1   28.50    3.00
  -2  -4  -1   26.20    2.70
   2   4   1   28.60    2.80
   2   4   1   29.70    3.00
   2   4   1   29.60    3.30
  -3  -4  -1  379.16   13.30
   3  -4   1  388.16   13.00
   3  -4   1  403.76   11.80
  -3  -4  -1  398.96   13.20
  -3  -4  -1  387.76   13.30
  -3  -4  -1  398.86   12.90
  -3  -4  -1  397.56   13.40
   3   4   1  389.86   13.60
   3   4   1  412.86   13.20
  -3   4  -1  384.26   11.40
  -3   4  -1  394.56   11.50
   3   4   1  388.66   13.20
  -4  -4  -1   65.89    4.60
  -4  -4  -1   73.79    4.90
  -4  -4  -1   73.79    4.50
  -4  -4  -1   64.79    4.60
  -4  -4  -1   73.49    4.80
   4  -4   1   78.79    3.90
  -4   4  -1   81.19    4.70
  -4   4  -1   73.39    3.60
   4   4   1   69.89    4.70
   4   4   1   71.29    4.80
  -4   4  -1   69.49    3.50
  -5  -4  -1  292.87   11.60
  -5  -4  -1  288.47   11.50
   5  -4   1  274.97   10.20
  -5  -4  -1  282.27   11.50
  -5  -4  -1  289.97   11.00
   5   4   1  297.27   11.60
  -5   4  -1  283.67   10.00
  -5   4  -1  299.17   11.20
   5   4   1  276.27   11.10
  -5   4  -1  287.97    9.90
  -6  -4  -1  296.77   12.20
  -6  -4  -1  282.57   11.30
   6  -4   1  271.07   10.70
  -6  -4  -1  284.47   11.90
  -6  -4  -1  266.27   11.70
   6   4   1  266.27   11.70
  -6   4  -1  266.17   10.20
  -6   4  -1  283.37   11.50
   6   4   1  267.97   11.60
  -6   4  -1  278.67    9.50
   6   4   1  287.87   11.60
  -6   4  -1  280.57   10.40
  -7  -4  -1  101.99    7.30
  -7  -4  -1  123.99    7.60
  -7  -4  -1  117.89    6.90
   7  -4   1   99.49    5.20
   7  -4   1  116.69    6.70
   7  -4   1  109.59    5.40
   7   4   1  130.49    7.90
  -7   4  -1  113.89    6.30
  -7   4  -1  116.09    7.30
   7   4   1  112.79    7.10
  -8  -4  -1   27.30    5.20
   8  -4   1   21.90    4.10
   8  -4   1   22.10    3.20
  -8  -4  -1   18.40    4.40
  -8  -4  -1   28.70    4.30
   8  -4   1   23.20    3.10
   8   4   1   23.00    5.10
  -8   4  -1   18.60    3.60
  -8   4  -1   20.40    4.30
   9  -4   1   13.40    3.80
  -9  -4  -1   13.50    4.50
   9  -4   1   11.20    2.80
  -9  -4  -1   11.60    3.90
  -9  -4  -1    9.40    3.80
   9  -4   1   11.90    2.80
   9   4   1   13.20    4.30
  -9   4  -1    7.00    2.90
  -9   4  -1   12.00    4.10
  10  -4   1   56.79    5.50
 -10  -4  -1   57.89    8.00
  10  -4   1   59.09    7.10
  10  -4   1   50.99    5.20
 -10   4  -1   54.69    7.40
 -10   4  -1   51.99    6.20
  10   4   1   38.30    6.20
  11  -4   1   46.70    5.30
  11  -4   1   38.50    5.00
  11  -4   1   46.00    7.10
 -11  -4  -1   50.89    8.10
  11   4   1   49.00    8.10
 -11   4  -1   44.60    7.50
 -11   4  -1   49.50    7.30
  12  -4   1   27.90    4.70
  12  -4   1   20.20    4.10
  12  -4   1   25.70    5.90
  12   4   1   21.90    7.20
 -12   4  -1   21.60    5.30
 -12   4  -1   18.60    5.90
  13  -4   1   37.70    5.30
  13  -4   1   40.50    5.60
  13  -4   1   51.79    8.60
  13   4   1   48.10    9.60
 -13   4  -1   36.80    7.80
 -13   4  -1   72.29   10.00
  13  -5  -1    6.60    5.00
 -13   5   1    2.00    4.20
  13   5  -1    5.70    4.80
 -13   5   1    2.80    4.80
  12  -5  -1   36.20    7.10
 -12  -5   1   46.10    8.90
 -12   5   1   41.60    7.50
 -12   5   1   34.30    6.60
  12   5  -1   43.90    8.60
 -11  -5   1   35.80    7.50
  11  -5  -1   33.80    6.20
  11  -5  -1   28.40    4.10
  11  -5  -1   41.10    4.90
 -11   5   1   40.30    6.90
  11   5  -1   20.00    5.40
 -11   5   1   33.10    5.80
 -10  -5   1   62.59    8.40
  10  -5  -1   49.30    4.90
  10  -5  -1   61.69    7.60
  10  -5  -1   46.00    4.80
 -10   5   1   68.39    7.70
  10   5  -1   45.70    6.70
 -10   5   1   45.20    6.30
   9  -5  -1   39.30    4.10
   9  -5  -1   42.00    5.80
   9  -5  -1   36.10    3.90
  -9  -5   1   39.30    6.60
  -9   5   1   36.00    5.10
  -9   5   1   49.70    6.40
   9   5  -1   34.70    5.40
  -8  -5   1    1.70    2.60
   8  -5  -1    6.60    2.10
   8  -5  -1    5.90    2.80
  -8  -5   1    0.20    2.80
   8  -5  -1    4.60    2.00
  -8   5   1    7.60    3.00
   8   5  -1    6.60    3.40
  -8   5   1    2.10    2.20
   8   5  -1    2.00    2.20
  -7  -5   1  214.08   10.40
  -7  -5   1  189.38    9.40
   7  -5  -1  208.18    9.10
   7   5  -1  185.68    9.60
  -7   5   1  182.98    8.40
   7   5  -1  187.98   10.00
  -7   5   1  200.88    9.40
   6  -5  -1   78.39    4.90
  -6  -5   1   59.59    5.70
  -6  -5   1   77.19    6.70
  -6  -5   1   74.29    5.20
  -6  -5   1   67.19    6.40
  -6   5   1   79.49    4.60
  -6   5   1   64.79    4.40
  -6   5   1   72.59    5.10
   6   5  -1   68.39    6.20
   6   5  -1   75.69    6.60
   5  -5  -1   45.40    4.00
  -5  -5   1   33.50    4.20
  -5  -5   1   41.90    4.20
  -5  -5   1   46.60    4.70
  -5   5   1   46.30    3.70
  -5   5   1   48.20    3.90
   5   5  -1   38.30    4.40
   5   5  -1   44.20    4.50
  -5   5   1   42.20    4.10
   4  -5  -1  181.88    7.10
  -4  -5   1  200.18    8.30
  -4  -5   1  189.88    8.30
  -4  -5   1  196.48    8.00
  -4  -5   1  184.08    8.30
   4   5  -1  196.58    8.40
   4   5  -1  193.48    8.30
  -4   5   1  195.68    6.90
  -4   5   1  199.48    7.00
  -4   5   1  197.68    7.50
  -3  -5   1  740.23   23.40
  -3  -5   1  764.72   23.40
   3  -5  -1  766.62   22.00
  -3  -5   1  796.32   23.60
   3   5  -1  771.92   23.30
  -3   5   1  789.02   21.70
   3   5  -1  767.12   23.00
  -3   5   1  771.22   22.40
  -3   5   1  773.02   21.60
   2  -5  -1   -0.30    0.90
  -2  -5   1    1.30    1.30
  -2  -5   1    1.20    1.20
   2  -5  -1    0.40    1.70
  -2  -5   1    2.30    1.50
  -2  -5   1    3.30    1.20
   2   5  -1    2.20    1.30
  -2   5   1    3.70    0.90
   2   5  -1    1.60    1.30
   1  -5  -1  146.69    5.00
  -1  -5   1  138.69    5.10
  -1  -5   1  145.89    5.10
  -1  -5   1  144.99    5.50
  -1  -5   1  144.99    5.30
  -1  -5   1  151.78    6.50
   1  -5  -1  137.79    6.30
   1   5  -1  153.18    5.70
  -1   5   1  146.59    4.90
  -1   5   1  153.48    5.20
   1   5  -1  144.89    5.10
   1   5  -1  150.38    5.30
  -1   5   1  156.38    5.00
   1   5  -1  142.59    5.40
   0  -5  -1  169.28    5.50
   0  -5   1  152.98    5.90
   0  -5  -1  160.08    6.70
   0  -5   1  166.88    6.90
   0  -5  -1  156.98    5.80
   0   5  -1  162.78    5.40
   0   5   1  165.28    5.70
   0   5   1  163.98    5.40
   0   5   1  170.78    5.70
   0   5   1  167.38    5.90
  -1  -5  -1   95.89    4.80
   1  -5   1   93.49    4.50
  -1  -5  -1   96.09    4.10
  -1  -5  -1   91.69    4.20
  -1  -5  -1   83.99    4.20
   1   5   1   93.89    4.20
   1   5   1   87.69    4.10
   1   5   1   92.99    4.40
   2  -5   1    0.10    1.50
  -2  -5  -1    0.30    1.30
  -2  -5  -1   -0.60    1.20
  -2  -5  -1    0.20    1.50
   2  -5   1    1.30    1.40
   2   5   1    2.40    1.50
   2   5   1    2.30    1.40
   2   5   1    0.20    1.20
  -3  -5  -1  204.78    8.10
   3  -5   1  199.48    8.10
  -3  -5  -1  197.08    8.30
  -3  -5  -1  188.98    8.00
   3   5   1  200.78    8.10
   3   5   1  193.78    8.00
   3   5   1  204.18    8.40
  -4  -5  -1  517.45   17.60
   4  -5   1  518.15   15.70
  -4  -5  -1  533.05   17.00
  -4  -5  -1  515.35   17.50
  -4  -5  -1  531.05   17.50
   4   5   1  496.55   17.80
   4   5   1  525.75   17.30
   4   5   1  526.25   17.50
  -4   5  -1  514.25   15.40
  -4   5  -1  530.65   15.40
   5  -5   1   34.10    3.30
  -5  -5  -1   20.20    3.50
  -5  -5  -1   29.80    4.00
  -5  -5  -1   20.70    3.10
  -5  -5  -1   32.30    4.40
  -5   5  -1   32.40    3.10
   5   5   1   33.00    4.40
  -5   5  -1   38.10    4.20
  -5   5  -1   27.90    2.80
   5   5   1   27.40    4.00
  -6  -5  -1   14.30    2.90
  -6  -5  -1    7.30    3.00
  -6  -5  -1   15.90    3.30
   6  -5   1   11.00    2.40
   6   5   1    8.70    3.10
  -6   5  -1   13.70    2.50
   6   5   1    9.80    3.00
  -6   5  -1   12.60    2.50
  -6   5  -1    9.50    2.90
  -7  -5  -1  121.99    8.00
  -7  -5  -1  129.79    7.40
   7  -5   1  132.89    7.10
   7   5   1  109.89    7.40
   7   5   1  113.19    7.80
  -7   5  -1  123.79    7.60
  -7   5  -1  131.09    6.60
  -8  -5  -1  144.09    8.60
   8  -5   1  146.29    8.30
  -8  -5  -1  160.38    9.60
  -8   5  -1  149.49    7.90
   8   5   1  139.59    9.10
  -8   5  -1  167.48    9.40
   9  -5   1   21.80    4.60
  -9  -5  -1   16.20    5.00
  -9   5  -1   21.60    4.10
   9   5   1   19.60    5.20
  -9   5  -1   16.30    4.80
  10  -5   1   -1.70    2.80
 -10  -5  -1   -4.20    3.20
 -10   5  -1    3.00    2.90
  10   5   1    0.70    3.00
 -10   5  -1    0.50    3.10
  11  -5   1   12.30    4.60
 -11  -5  -1   10.40    4.80
 -11   5  -1   17.70    5.80
 -11   5  -1   13.50    4.40
  11   5   1   13.80    5.50
  12  -5   1   23.60    6.30
 -12  -5  -1   10.80    6.10
  12   5   1    9.50    4.80
 -12   5  -1   19.40    5.60
 -12   5  -1   14.60    5.30
  13  -5   1   17.00    6.20
 -13   5  -1   14.70    5.50
  13   5   1   20.90    7.30
 -13   5  -1   15.20    5.30
  13  -6  -1   34.50    7.80
  13   6  -1   61.49   10.20
 -13   6   1   28.30    6.60
 -13   6   1   32.10    7.60
  12  -6  -1    9.80    5.20
 -12  -6   1    8.50    5.10
  12   6  -1    2.70    3.80
 -12   6   1    5.20    4.40
 -12   6   1    2.20    4.50
 -11  -6   1    0.80    4.10
  11  -6  -1    7.80    4.20
 -11   6   1    7.80    4.60
  11   6  -1   -2.10    3.40
 -11   6   1   -0.80    3.30
 -10  -6   1    3.30    3.80
  10  -6  -1    0.90    3.30
  10   6  -1   -1.50    3.30
 -10   6   1    0.10    3.50
 -10   6   1   -0.10    2.70
  -9  -6   1   -1.70    3.20
   9  -6  -1    2.80    2.80
   9   6  -1    4.50    3.00
  -9   6   1    0.90    2.40
  -9   6   1   -1.60    2.80
  -8  -6   1   52.39    6.80
   8  -6  -1   62.89    6.40
   8   6  -1   58.39    6.60
  -8   6   1   54.09    6.10
  -8   6   1   44.30    5.10
   8   6  -1   41.70    5.90
  -7  -6   1   15.10    3.80
   7  -6  -1   20.30    3.50
   7   6  -1   18.40    4.00
  -7   6   1   21.60    3.30
   7   6  -1   13.90    3.90
  -7   6   1   26.60    4.00
  -6  -6   1   24.70    4.10
  -6  -6   1   22.10    4.00
   6  -6  -1   30.90    3.70
  -6  -6   1   22.60    3.60
  -6  -6   1   18.90    3.20
  -6   6   1   23.10    3.50
   6   6  -1   23.00    3.80
   6   6  -1   26.20    4.10
  -6   6   1   20.90    3.00
  -6   6   1   25.70    3.10
  -5  -6   1   76.39    5.20
  -5  -6   1   70.49    4.90
   5  -6  -1   67.19    4.20
  -5  -6   1   74.69    5.40
  -5  -6   1   73.69    5.60
   5   6  -1   72.39    5.30
  -5   6   1   77.89    4.10
   5   6  -1   71.79    6.00
  -5   6   1   71.89    4.00
  -5   6   1   70.69    4.50
  -4  -6   1   37.10    4.10
  -4  -6   1   18.00    2.80
   4  -6  -1   20.10    2.40
  -4  -6   1   18.30    3.20
  -4   6   1   24.40    2.80
  -4   6   1   24.90    2.40
   4   6  -1   27.30    3.50
  -4   6   1   24.80    2.50
   4   6  -1   26.70    3.40
  -3  -6   1  195.98    6.80
  -3  -6   1  193.48    8.20
  -3  -6   1  209.58    8.10
   3  -6  -1  189.88    6.70
  -3  -6   1  193.48    8.00
   3   6  -1  192.28    8.00
   3   6  -1  191.18    8.00
  -3   6   1  206.28    6.60
  -3   6   1  205.48    6.60
  -2  -6   1   48.00    3.90
   2  -6  -1   45.50    4.40
  -2  -6   1   41.50    3.00
  -2  -6   1   45.70    3.10
  -2  -6   1   43.30    2.80
   2   6  -1   45.80    3.20
   2   6  -1   48.50    3.40
   2   6  -1   38.80    3.00
  -1  -6   1    2.20    1.90
  -1  -6   1    3.40    1.40
  -1  -6   1    1.60    1.40
   1  -6  -1    2.10    1.70
  -1   6   1    2.50    1.00
   1   6  -1    2.20    1.30
  -1   6   1    4.20    1.20
   1   6  -1    3.10    1.10
   1   6  -1    2.90    1.20
   1   6  -1    1.60    1.10
  -1   6   1    3.60    1.10
   0  -6  -1   30.50    2.60
   0  -6   1   25.00    1.80
   0  -6  -1   34.90    2.40
   0  -6   1   29.00    2.80
   0  -6   1   34.80    3.90
   0  -6  -1   29.40    3.40
   0   6  -1   24.80    1.80
   0   6  -1   29.20    2.00
   0   6   1   32.20    2.50
   0   6   1   31.70    2.30
   0   6   1   27.50    2.60
   1  -6   1   14.50    2.30
  -1  -6  -1   14.00    1.90
  -1  -6  -1   15.10    2.70
  -1  -6  -1   14.30    2.20
  -1  -6  -1   11.80    1.90
   1  -6   1   10.90    2.60
   1   6   1   13.60    1.90
   1   6   1   13.80    2.30
   1   6   1   10.90    1.80
   1   6   1   16.40    2.20
  -2  -6  -1   43.10    3.40
  -2  -6  -1   43.50    3.30
   2  -6   1   50.49    4.50
  -2  -6  -1   53.09    4.30
   2  -6   1   44.00    4.60
   2   6   1   46.40    3.40
   2   6   1   43.70    4.20
   2   6   1   49.40    3.50
  -3  -6  -1    5.20    2.20
  -3  -6  -1    1.30    1.60
  -3  -6  -1    4.00    1.70
   3  -6   1    1.80    1.80
   3   6   1    3.40    1.80
   3   6   1    4.70    2.00
   3   6   1    5.20    2.10
  -4  -6  -1    4.00    1.90
   4  -6   1    3.10    2.00
   4  -6   1    3.60    1.30
  -4  -6  -1    2.10    2.20
  -4  -6  -1    3.00    2.00
  -4  -6  -1    4.90    1.70
  -4   6  -1    4.40    1.20
  -4   6  -1    6.70    1.40
   4   6   1    5.00    2.10
   4   6   1    5.30    2.30
   4   6   1    6.40    2.40
   5  -6   1    0.60    1.30
  -5  -6  -1    4.50    2.30
  -5  -6  -1   -0.30    1.80
  -5  -6  -1    3.60    1.70
  -5  -6  -1    1.40    1.90
  -5   6  -1    3.50    1.40
  -5   6  -1    2.80    1.40
   5   6   1   -0.10    1.80
  -5   6  -1    3.00    2.20
   5   6   1    0.40    1.70
  -6  -6  -1   15.00    3.20
  -6  -6  -1   12.90    3.50
  -6  -6  -1   17.20    3.90
   6  -6   1   14.40    2.80
  -6   6  -1   14.00    2.40
  -6   6  -1   17.30    3.50
  -6   6  -1   17.50    2.60
   6   6   1   16.10    3.70
   6   6   1   20.80    4.10
  -7  -6  -1    5.60    2.80
   7  -6   1    7.60    2.70
  -7  -6  -1    9.60    3.60
   7   6   1   18.90    4.10
   7   6   1    7.10    3.00
  -7   6  -1   16.70    3.80
  -7   6  -1   10.90    2.60
   8  -6   1    1.30    2.60
  -8   6  -1   -1.50    2.70
  -8   6  -1    1.10    2.20
   8   6   1    2.50    3.00
  -9  -6  -1    4.10    3.70
   9  -6   1   -1.20    2.60
  -9   6  -1    0.10    2.80
  -9   6  -1    3.40    2.60
   9   6   1   -3.80    2.50
 -10  -6  -1    2.70    4.30
  10  -6   1    3.80    3.70
 -10   6  -1    0.10    2.80
 -10   6  -1    8.10    4.20
  10   6   1    3.90    3.70
 -11  -6  -1   -0.10    4.00
  11  -6   1   -1.30    3.70
 -11   6  -1    4.30    3.50
 -11   6  -1    2.10    4.00
  11   6   1    0.80    3.70
 -12  -6  -1   13.30    5.90
  12  -6   1   15.70    5.70
  12   6   1    6.90    5.10
 -12   6  -1   10.20    4.40
 -12   6  -1   15.20    5.90
  13  -6   1    4.60    5.30
 -13   6  -1    4.30    4.20
 -13   6  -1    0.10    5.10
  13   6   1   -0.60    3.90
 -13  -7   1   -3.20    4.90
  13  -7  -1   -5.90    4.30
 -13   7   1    0.60    3.90
  13   7  -1    2.10    4.70
 -13   7   1    0.90    4.80
  12  -7  -1   41.00    7.20
 -12  -7   1   33.00    7.70
 -12   7   1   33.90    6.10
  12   7  -1   25.10    6.30
 -12   7   1   25.80    6.70
  11  -7  -1   14.70    5.10
 -11  -7   1   14.50    5.70
 -11   7   1   13.50    5.00
 -11   7   1   20.70    4.70
  11   7  -1   23.50    6.30
 -10  -7   1   34.60    6.60
  10  -7  -1   30.80    5.60
  10   7  -1   29.30    5.80
 -10   7   1   28.40    5.00
 -10   7   1   41.00    6.60
   9  -7  -1   -0.80    2.80
  -9  -7   1   -4.60    3.00
  -9   7   1   -1.00    2.90
   9   7  -1    0.50    3.20
  -9   7   1   -1.70    2.40
   8  -7  -1   41.50    5.20
  -8  -7   1   28.30    5.30
   8   7  -1   32.80    5.20
  -8   7   1   34.20    5.20
   8   7  -1   36.50    6.10
  -8   7   1   27.70    4.40
   7  -7  -1   -0.10    2.10
  -7  -7   1    0.10    2.80
   7   7  -1    3.70    3.20
   7   7  -1    0.40    2.40
  -7   7   1    3.30    2.30
  -7   7   1   -1.40    2.00
   6  -7  -1   17.30    2.90
  -6  -7   1   21.60    4.10
  -6  -7   1   23.60    4.10
  -6  -7   1   14.90    3.20
  -6   7   1   18.80    2.80
  -6   7   1   15.00    3.10
   6   7  -1   16.20    3.50
  -6   7   1   20.00    2.90
   6   7  -1   24.40    4.30
  -5  -7   1   19.90    3.80
  -5  -7   1    9.90    2.70
  -5  -7   1   15.60    3.10
   5  -7  -1   11.00    2.20
  -5   7   1   13.60    2.30
   5   7  -1   11.50    3.10
  -5   7   1   15.40    2.80
   5   7  -1    8.70    2.80
  -5   7   1   15.60    2.30
  -4  -7   1  593.44   17.40
  -4  -7   1  619.94   19.70
  -4  -7   1  587.54   19.60
   4  -7  -1  603.34   17.90
  -4  -7   1  571.94   19.70
  -4   7   1  605.84   18.60
   4   7  -1  584.44   19.40
  -4   7   1  595.94   17.40
   4   7  -1  605.64   19.70
  -4   7   1  600.14   17.60
  -3  -7   1    7.40    2.40
  -3  -7   1    6.50    1.90
  -3  -7   1    6.00    1.90
  -3  -7   1    7.20    1.60
   3   7  -1   10.60    2.10
   3   7  -1    8.60    2.30
  -2  -7   1    5.50    1.50
   2  -7  -1    9.50    2.80
  -2  -7   1    4.90    1.50
  -2  -7   1    9.30    1.90
  -2  -7   1    9.00    2.20
  -2  -7   1   11.00    2.70
   2   7  -1    7.40    1.80
   2   7  -1    5.50    1.60
   2   7  -1    5.60    1.80
  -1  -7   1    6.30    1.70
  -1  -7   1    4.20    1.60
   1  -7  -1    4.20    2.10
  -1  -7   1    4.50    2.10
   1   7  -1    5.50    1.50
   1   7  -1    5.40    1.70
  -1   7   1    8.30    1.50
  -1   7   1    6.20    1.60
  -1   7   1    5.70    1.30
   1   7  -1    4.30    1.50
   0  -7   1   40.50    2.60
   0  -7  -1   43.00    3.00
   0  -7  -1   40.80    4.50
   0  -7   1   46.50    4.70
   0  -7   1   47.40    3.30
   0  -7  -1   46.00    2.90
   0   7   1   41.40    2.80
   0   7   1   38.90    3.00
   0   7  -1   42.60    2.40
   0   7  -1   38.70    2.30
   0   7  -1   48.00    2.70
   0   7   1   45.00    2.90
  -1  -7  -1   66.59    3.60
   1  -7   1   64.79    4.80
  -1  -7  -1   60.99    4.60
  -1  -7  -1   71.29    3.60
  -1  -7  -1   67.29    4.00
   1  -7   1   73.89    4.30
   1   7   1   68.29    3.60
   1   7   1   72.69    4.20
   1   7   1   63.89    3.80
   1   7   1   73.79    3.90
   2  -7   1   18.40    3.30
  -2  -7  -1   16.50    2.40
  -2  -7  -1   25.00    3.20
   2  -7   1   22.60    3.20
  -2  -7  -1   17.00    2.40
  -2  -7  -1   18.40    3.10
   2   7   1   16.60    2.50
   2   7   1   22.10    3.30
   2   7   1   14.30    2.60
   3  -7   1  174.08    8.40
  -3  -7  -1  159.78    7.40
  -3  -7  -1  165.48    7.40
  -3  -7  -1  153.28    7.50
   3  -7   1  174.68    7.80
   3   7   1  161.78    7.80
   3   7   1  169.98    7.60
   3   7   1  156.98    7.30
   4  -7   1  135.79    7.30
  -4  -7  -1  148.99    7.50
  -4  -7  -1  141.09    7.10
  -4  -7  -1  128.09    6.90
   4   7   1  118.09    7.10
   4   7   1  136.49    7.10
   4   7   1  131.49    7.00
  -5  -7  -1  260.67   11.30
  -5  -7  -1  270.77   11.20
   5  -7   1  236.08    8.80
  -5  -7  -1  265.77   11.10
  -5  -7  -1  244.78   10.40
  -5   7  -1  255.17    8.70
  -5   7  -1  258.27    8.80
   5   7   1  271.67   11.30
   5   7   1  238.28   10.80
   6  -7   1    0.90    1.70
  -6  -7  -1    0.10    2.10
  -6  -7  -1   -1.50    2.30
   6   7   1   -0.10    2.30
  -6   7  -1    2.20    2.30
   6   7   1   -0.30    2.00
  -6   7  -1   -1.00    1.40
  -6   7  -1   -1.10    1.20
   7  -7   1   28.00    4.00
  -7  -7  -1   23.40    5.00
   7   7   1   23.20    4.70
  -7   7  -1   24.20    3.40
  -7   7  -1   33.60    5.00
   7   7   1   36.90    5.40
   8  -7   1   32.40    4.50
  -8  -7  -1   20.50    4.90
  -8   7  -1   30.00    4.10
  -8   7  -1   34.30    5.50
   8   7   1   17.30    4.60
  -9  -7  -1   51.09    7.70
   9  -7   1   43.10    5.70
   9   7   1   42.00    7.10
  -9   7  -1   33.00    5.70
  -9   7  -1   33.90    4.80
 -10  -7  -1    8.30    4.60
  10  -7   1    2.20    3.30
 -10   7  -1    7.10    4.30
 -10   7  -1   -0.90    2.60
  10   7   1   -2.60    3.30
 -11  -7  -1   18.30    5.80
  11  -7   1   16.30    5.10
 -11   7  -1   18.80    5.60
 -11   7  -1   34.10    6.10
  11   7   1   26.30    6.60
  12  -7   1    8.50    5.00
 -12   7  -1   -2.40    3.20
  12   7   1    1.10    4.60
 -12   7  -1   -1.20    4.80
  12  -8  -1   33.30    6.70
 -12  -8   1   17.50    5.80
  12   8  -1   14.30    5.40
 -12   8   1   32.90    6.30
 -11  -8   1   13.00    5.20
  11  -8  -1    6.50    4.30
 -11   8   1    8.40    4.70
  11   8  -1    4.00    4.10
 -11   8   1    5.80    3.70
  10  -8  -1   41.70    6.20
 -10  -8   1   24.70    5.80
  10   8  -1   49.70    8.20
 -10   8   1   43.50    6.80
 -10   8   1   51.59    6.20
  -9  -8   1  189.28   11.70
   9  -8  -1  169.78    9.60
  -9   8   1  176.98   10.40
   9   8  -1  168.68   11.10
  -9   8   1  191.58    9.40
   8  -8  -1  146.09    8.20
  -8  -8   1  153.38   10.20
  -8   8   1  147.49    7.80
   8   8  -1  165.48   10.10
   8   8  -1  152.88    9.70
  -8   8   1  166.08    9.20
  -7  -8   1  153.58    9.50
   7  -8  -1  163.28    7.90
  -7  -8   1  175.38   10.20
  -7   8   1  165.28    8.60
  -7   8   1  163.78    7.60
   7   8  -1  155.08    9.50
   7   8  -1  167.48    9.50
  -6  -8   1   20.90    4.10
  -6  -8   1   25.40    5.00
   6  -8  -1   15.80    3.00
  -6  -8   1   22.90    4.10
   6   8  -1   23.20    4.20
  -6   8   1   23.30    3.50
  -6   8   1   22.20    2.90
   6   8  -1   20.20    4.10
  -6   8   1   19.40    2.90
  -5  -8   1  231.78   10.30
   5  -8  -1  233.58    8.60
  -5  -8   1  235.28   10.30
  -5  -8   1  223.78   10.60
   5   8  -1  230.58   10.30
  -5   8   1  219.98    8.30
  -5   8   1  234.68    8.30
   5   8  -1  230.28   10.50
  -5   8   1  240.88    9.30
  -4  -8   1   19.90    3.30
  -4  -8   1   20.80    3.30
   4  -8  -1   21.80    2.50
  -4  -8   1   22.70    2.50
  -4  -8   1   18.20    3.50
   4   8  -1   12.30    2.90
   4   8  -1   15.70    3.10
  -4   8   1   23.00    2.30
  -4   8   1   22.20    2.30
  -3  -8   1    1.90    1.50
  -3  -8   1    4.20    1.80
  -3  -8   1    1.00    1.60
  -3  -8   1    3.30    2.10
   3  -8  -1    5.30    2.60
   3   8  -1    0.90    1.60
   3   8  -1    4.80    2.10
  -3   8   1    1.20    1.00
   2  -8  -1   91.89    6.00
  -2  -8   1   91.89    4.40
  -2  -8   1   93.39    6.00
  -2  -8   1   96.19    4.50
  -2  -8   1   87.99    5.10
  -2  -8   1   98.19    4.60
  -2   8   1   95.59    4.10
   2   8  -1  103.19    5.40
   2   8  -1   96.49    5.00
   2   8  -1   86.79    4.40
   2   8  -1  101.79    5.10
  -1  -8   1   12.10    3.10
  -1  -8   1   18.40    2.40
   1  -8  -1   16.30    3.20
  -1  -8   1   19.60    2.60
   1  -8  -1   20.10    2.30
  -1   8   1   15.00    1.90
  -1   8   1   18.60    2.30
   1   8  -1   17.10    2.20
   1   8  -1   17.70    2.60
   1   8  -1   14.60    2.10
  -1   8   1   18.30    2.00
   0  -8  -1   12.30    2.20
   0  -8  -1   12.20    2.00
   0  -8  -1   14.00    3.20
   0  -8   1   11.90    2.30
   0  -8   1    7.70    2.80
   0  -8   1   12.30    1.80
   0   8  -1   12.00    1.70
   0   8  -1   14.10    2.10
   0   8   1   10.80    2.00
   0   8  -1    7.90    1.50
   0   8   1   10.40    1.90
   0   8   1    8.20    1.80
   1  -8   1   73.09    5.30
   1  -8   1   67.79    4.40
  -1  -8  -1   71.89    3.60
  -1  -8  -1   64.29    3.60
  -1  -8  -1   70.39    6.40
  -1  -8  -1   71.19    4.40
   1   8   1   70.39    4.30
   1   8   1   69.19    4.10
   1   8   1   72.69    3.70
   1   8   1   72.89    4.20
  -2  -8  -1  108.49    6.00
  -2  -8  -1  114.09    6.50
   2  -8   1  104.89    6.60
   2  -8   1  132.69    6.40
  -2  -8  -1  116.69    5.60
  -2  -8  -1  119.89    5.60
   2   8   1  111.99    5.50
   2   8   1  119.39    5.90
   2   8   1  113.39    6.10
   2   8   1  115.19    5.80
  -3  -8  -1   98.89    6.00
  -3  -8  -1   99.59    5.60
  -3  -8  -1   88.89    5.40
   3  -8   1   97.49    6.50
   3  -8   1   93.99    6.00
   3   8   1  102.99    5.90
   3   8   1   95.39    5.90
   3   8   1   96.39    5.50
  -4  -8  -1   -0.60    1.70
  -4  -8  -1   -2.10    1.70
   4  -8   1    3.40    2.50
  -4  -8  -1   -0.50    1.80
   4   8   1    2.20    2.20
   4   8   1    1.30    2.00
   4   8   1    0.20    1.90
  -5  -8  -1   73.29    6.80
  -5  -8  -1   58.39    5.50
  -5  -8  -1   70.09    6.40
   5  -8   1   64.49    3.70
   5   8   1   74.19    6.80
   5   8   1   65.59    6.10
  -6  -8  -1   70.59    7.10
  -6  -8  -1   72.39    7.00
   6  -8   1   63.29    4.30
  -6   8  -1   63.19    4.10
   6   8   1   55.29    6.20
  -6   8  -1   61.29    4.00
   6   8   1   67.59    6.90
  -6   8  -1   61.59    5.90
   7  -8   1   15.20    3.20
  -7  -8  -1   11.60    4.00
  -7   8  -1   16.00    2.90
   7   8   1   16.20    4.50
  -7   8  -1   15.90    4.00
   7   8   1   12.30    3.80
   8  -8   1    5.30    2.70
  -8  -8  -1    3.60    3.50
  -8   8  -1    2.10    2.30
   8   8   1    1.70    3.20
   8   8   1   -1.30    2.50
  -8   8  -1    5.60    3.40
  -9  -8  -1   86.49    9.90
   9  -8   1   69.29    7.10
   9   8   1   79.09    9.80
  -9   8  -1   70.89    8.30
  -9   8  -1   66.59    6.30
  10  -8   1   20.00    4.80
 -10  -8  -1   17.60    5.40
 -10   8  -1   23.10    4.60
 -10   8  -1   19.50    5.50
  10   8   1   17.80    5.20
 -11  -8  -1   11.90    5.40
  11  -8   1    6.30    4.40
 -11   8  -1   11.50    4.10
 -11   8  -1   15.30    5.60
  11   8   1    9.20    4.70
  12  -8   1    0.90    4.80
 -12  -8  -1    2.80    4.60
 -12   8  -1   -8.50    4.10
 -12   8  -1   -1.10    3.40
  12   8   1    6.30    5.20
 -12  -9   1   -6.50    4.20
  12  -9  -1   -3.80    4.10
 -12   9   1   -0.50    3.60
  12   9  -1    1.70    4.90
 -11  -9   1    6.80    4.70
  11  -9  -1    9.60    4.80
 -11   9   1    5.60    3.70
  11   9  -1    8.70    5.30
  10  -9  -1   -0.90    3.20
 -10  -9   1    0.50    3.70
 -10   9   1   -1.50    2.60
  10   9  -1   -3.20    3.40
  -9  -9   1    8.90    4.40
   9  -9  -1    8.60    3.80
  -9   9   1    8.30    3.90
  -9   9   1    6.10    3.10
   9   9  -1    4.00    3.80
  -8  -9   1    9.30    4.30
   8  -9  -1    4.20    3.00
  -8   9   1    4.40    2.40
   8   9  -1    7.10    3.70
  -8   9   1   -1.40    2.80
   8   9  -1    0.10    2.80
  -7  -9   1   21.80    4.60
  -7  -9   1   23.40    4.60
   7  -9  -1   27.80    4.00
   7   9  -1   25.40    5.00
  -7   9   1   26.80    4.20
  -7   9   1   18.30    3.10
   7   9  -1   17.40    4.20
  -6  -9   1  196.08   10.40
  -6  -9   1  188.08    7.50
   6  -9  -1  174.08    7.90
  -6  -9   1  188.28    9.70
  -6  -9   1  186.68    9.80
  -6   9   1  200.28    8.90
  -6   9   1  178.08    7.60
   6   9  -1  196.88   10.10
   6   9  -1  181.68    9.60
  -6   9   1  198.68    7.90
  -5  -9   1   28.60    2.90
   5  -9  -1   25.00    3.00
  -5  -9   1   34.80    4.50
  -5  -9   1   26.10    4.30
  -5  -9   1   20.20    3.60
   5   9  -1   27.20    4.30
  -5   9   1   20.70    2.60
  -5   9   1   22.70    3.30
   5   9  -1   28.70    4.50
  -5   9   1   24.50    2.80
  -4  -9   1   10.50    3.20
   4  -9  -1    7.70    1.70
  -4  -9   1    7.20    1.80
  -4  -9   1    3.60    2.10
  -4  -9   1    5.80    2.30
   4   9  -1    6.70    2.30
  -4   9   1    4.70    1.40
   4   9  -1    5.40    2.60
  -3  -9   1  109.99    5.40
  -3  -9   1  102.19    5.40
   3  -9  -1   97.99    6.80
  -3  -9   1   86.89    6.50
  -3  -9   1   92.39    4.50
  -3  -9   1   89.29    5.70
   3   9  -1   95.69    5.30
   3   9  -1  102.09    5.90
   2  -9  -1  136.89    7.80
  -2  -9   1  134.39    5.70
  -2  -9   1  134.99    7.80
  -2  -9   1  141.59    6.70
   2   9  -1  128.19    6.30
   2   9  -1  144.39    6.50
   2   9  -1  126.69    5.60
   2   9  -1  139.99    6.80
  -2   9   1  147.69    5.60
  -1  -9   1   32.70    4.60
   1  -9  -1   38.10    3.20
  -1  -9   1   38.30    3.60
   1  -9  -1   28.10    4.40
  -1  -9   1   38.00    3.60
   1   9  -1   31.60    3.20
   1   9  -1   39.40    3.40
  -1   9   1   34.20    3.00
  -1   9   1   37.30    3.30
   1   9  -1   37.70    3.70
  -1   9   1   34.10    2.90
   0  -9  -1  104.29    6.50
   0  -9  -1   99.89    4.70
   0  -9  -1  100.49    5.10
   0  -9   1  100.29    6.60
   0  -9   1   85.89    5.10
   0  -9   1  102.49    4.50
   0   9  -1   96.09    4.60
   0   9  -1   92.69    4.20
   0   9   1  103.09    4.90
   0   9  -1   94.79    4.30
   0   9   1  100.89    4.80
   0   9   1   97.39    5.10
   1  -9   1   97.29    5.50
  -1  -9  -1   98.59    5.50
  -1  -9  -1  100.79    6.50
   1  -9   1  102.29    6.60
   1   9   1   94.19    5.10
   1   9   1  104.59    5.60
   1   9   1  107.69    5.30
   1   9   1   92.99    4.30
   2  -9   1   83.19    7.30
  -2  -9  -1   86.79    4.70
   2  -9   1   82.49    5.50
  -2  -9  -1   93.09    6.30
  -2  -9  -1   82.89    5.40
   2   9   1   90.29    5.20
   2   9   1   92.49    5.60
   2   9   1   78.09    4.60
   2   9   1   77.49    5.10
  -3  -9  -1   28.30    4.50
  -3  -9  -1   32.80    3.70
  -3  -9  -1   27.80    4.10
   3  -9   1   25.50    4.50
   3  -9   1   30.90    4.40
  -3  -9  -1   25.50    3.40
   3   9   1   23.90    3.50
   3   9   1   29.30    4.20
   3   9   1   31.10    4.00
  -4  -9  -1  114.79    7.20
  -4  -9  -1  130.59    7.10
   4  -9   1  123.29    7.40
  -4  -9  -1  119.19    6.90
   4   9   1  120.89    7.40
   4   9   1  102.59    6.50
   4   9   1  119.99    7.10
  -5  -9  -1   29.80    4.20
  -5  -9  -1   19.90    4.00
  -5  -9  -1   25.80    4.10
   5   9   1   25.80    4.50
   5   9   1   28.20    4.20
  -6  -9  -1   17.70    3.90
  -6  -9  -1   11.10    4.00
   6  -9   1   14.80    2.60
   6   9   1   18.50    4.00
  -6   9  -1   17.80    3.90
  -6   9  -1   15.00    2.40
  -6   9  -1   12.80    2.30
   6   9   1   20.80    4.40
  -7  -9  -1   40.10    6.30
   7  -9   1   38.20    4.20
  -7   9  -1   38.40    3.90
   7   9   1   43.40    6.30
  -7   9  -1   36.00    5.20
   7   9   1   37.80    6.00
   8  -9   1   42.40    5.10
  -8  -9  -1   39.60    7.00
   8   9   1   47.50    6.70
   8   9   1   33.20    5.80
  -8   9  -1   36.20    4.30
  -8   9  -1   42.80    6.00
   9  -9   1    4.70    3.20
  -9  -9  -1    9.40    4.60
  -9   9  -1    8.20    4.20
   9   9   1    7.60    4.70
  -9   9  -1    6.40    2.80
 -10  -9  -1   20.40    6.30
  10  -9   1   10.50    4.30
  10   9   1   20.00    5.60
 -10   9  -1   18.10    5.40
 -10   9  -1   18.00    4.10
  11  -9   1    4.90    3.80
 -11  -9  -1    6.30    5.20
 -11   9  -1   -5.10    2.50
  11   9   1    3.70    4.60
 -11   9  -1    7.50    4.70
 -12  -9  -1   55.29    8.90
  12  -9   1   57.79    8.40
 -12   9  -1   64.69    9.60
 -12   9  -1   45.80    7.10
  12   9   1   39.40    8.60
  12 -10  -1   26.60    6.40
 -12 -10   1   24.20    7.00
 -12  10   1   17.50    4.80
  11 -10  -1   -4.10    3.60
 -11 -10   1    5.60    5.10
 -11  10   1    5.70    3.40
 -10 -10   1   74.49   10.00
  10 -10  -1   80.19    8.00
 -10  10   1   60.49    6.60
  10  10  -1   73.89    9.80
  -9 -10   1  114.99   11.50
   9 -10  -1   98.79    7.30
  -9  10   1  100.29    6.80
   9  10  -1   94.79    9.80
  -8 -10   1   85.79    9.00
   8 -10  -1   79.59    6.90
   8  10  -1   82.49    8.50
  -8  10   1   78.19    5.60
   8  10  -1   76.19    8.30
  -7 -10   1   -0.10    3.00
  -7 -10   1    0.70    3.30
   7 -10  -1   -0.10    2.10
  -7  10   1    1.00    2.10
   7  10  -1   -2.60    2.20
   7  10  -1   -1.60    2.80
  -6 -10   1  312.07   13.80
  -6 -10   1  311.67   13.30
  -6 -10   1  281.87   12.90
   6 -10  -1  319.27   11.10
  -6  10   1  280.47   10.50
   6  10  -1  298.07   13.00
  -6  10   1  283.67   11.70
   6  10  -1  287.87   13.30
  -6  10   1  285.47   11.10
  -5 -10   1    1.90    2.40
   5 -10  -1    5.60    1.90
  -5 -10   1    9.10    3.40
  -5 -10   1    5.70    2.70
   5  10  -1    7.40    3.00
  -5  10   1    5.30    2.40
  -5  10   1    4.40    1.80
   5  10  -1    4.30    2.60
  -5  10   1    7.10    1.80
  -4 -10   1    0.30    2.30
  -4 -10   1    0.00    2.50
  -4 -10   1   -1.50    1.80
  -4 -10   1    0.70    2.00
   4  10  -1   -0.20    2.30
   4  10  -1    0.10    1.90
  -3 -10   1   14.70    3.40
   3 -10  -1   14.30    3.90
  -3 -10   1   10.40    2.30
  -3 -10   1   13.60    3.70
  -3 -10   1   12.10    2.50
   3  10  -1   14.00    3.00
   2 -10  -1   41.80    5.60
  -2 -10   1   53.59    6.30
  -2 -10   1   50.59    3.60
  -2 -10   1   43.00    4.50
   2  10  -1   54.39    5.30
   2  10  -1   41.30    4.20
  -2  10   1   49.70    3.30
   2  10  -1   44.50    4.20
  -1 -10   1  204.98    8.20
   1 -10  -1  197.08   10.10
   1 -10  -1  201.28    7.90
  -1 -10   1  201.68   10.20
  -1 -10   1  198.88    8.00
  -1  10   1  207.78    7.60
   1  10  -1  211.98    8.10
  -1  10   1  227.38    7.70
  -1  10   1  209.08    7.90
   1  10  -1  218.08    8.60
   1  10  -1  199.28    8.00
   0 -10   1    4.40    1.80
   0 -10  -1    8.10    2.20
   0 -10   1    1.20    1.80
   0 -10  -1    7.70    3.00
   0 -10   1    4.80    2.80
   0  10  -1   10.80    2.20
   0  10  -1    6.70    1.70
   0  10   1   10.80    2.40
   0  10  -1    9.30    1.90
   0  10   1    9.80    2.20
   0  10   1   11.20    2.30
   1 -10   1  226.08    9.30
   1 -10   1  220.78   10.80
  -1 -10  -1  221.28   10.60
  -1 -10  -1  227.78    9.20
   1  10   1  210.08    8.80
   1  10   1  238.68    9.00
   1  10   1  223.48    9.30
  -2 -10  -1  392.16   13.00
  -2 -10  -1  370.76   14.10
  -2 -10  -1  370.86   15.30
   2 -10   1  389.46   14.20
   2 -10   1  387.46   15.70
  -2 -10  -1  405.66   13.30
   2  10   1  421.56   14.70
   2  10   1  381.86   13.90
  -3 -10  -1  184.98    8.40
   3 -10   1  200.38    9.40
  -3 -10  -1  188.08    9.10
   3 -10   1  176.18    9.90
  -3 -10  -1  197.98    8.40
  -3 -10  -1  190.78    9.80
   3  10   1  198.98    9.40
   3  10   1  179.68    8.80
   3  10   1  179.08    8.20
  -4 -10  -1   14.10    3.10
  -4 -10  -1   13.60    3.60
  -4 -10  -1   12.30    3.50
  -4 -10  -1   12.00    3.00
   4  10   1   18.00    3.60
   4  10   1   18.40    3.90
   4  10   1   17.10    3.80
  -5 -10  -1   74.79    7.50
  -5 -10  -1   85.29    6.50
  -5 -10  -1   87.19    6.60
   5  10   1   87.49    7.90
   5  10   1   75.69    7.00
  -6 -10  -1    1.70    3.00
   6 -10   1    2.50    1.80
  -6 -10  -1    4.90    3.50
   6  10   1   -3.20    2.50
   6  10   1    4.60    3.00
  -6  10  -1    2.30    2.80
  -7 -10  -1    6.90    4.20
   7 -10   1   18.10    3.20
  -7  10  -1   13.40    2.60
   7  10   1   17.20    4.60
  -7  10  -1   19.90    4.20
   7  10   1   14.30    4.60
   8 -10   1   59.29    5.80
  -8 -10  -1   42.80    7.10
  -8  10  -1   61.49    7.30
   8  10   1   38.20    6.40
  -8  10  -1   53.29    5.10
   8  10   1   57.19    7.60
  -9 -10  -1   86.59    9.50
   9 -10   1   98.39    7.10
   9  10   1  105.59   11.20
  -9  10  -1   69.59    6.40
  -9  10  -1   89.19    9.50
 -10 -10  -1    8.60    5.20
  10 -10   1   -1.80    3.30
 -10  10  -1    4.20    3.20
  10  10   1   11.30    5.10
 -10  10  -1   14.60    5.30
  11 -10   1   17.10    5.00
 -11 -10  -1   16.50    6.10
 -11  10  -1   21.70    5.00
  11  10   1   11.30    5.50
 -11 -11   1   13.90    6.20
  11 -11  -1    8.80    4.70
 -11  11   1    9.50    4.50
  10 -11  -1   20.50    5.10
 -10 -11   1   17.00    6.20
 -10  11   1   19.10    4.40
  -9 -11   1    2.10    4.30
   9 -11  -1    2.60    3.00
  -9  11   1    0.50    2.50
  -8 -11   1   30.50    6.00
   8  11  -1   32.80    6.30
  -8  11   1   30.40    4.20
  -7 -11   1  121.49    8.60
  -7 -11   1  134.99    9.60
   7 -11  -1  113.99    6.60
  -7  11   1  115.79    6.30
   7  11  -1  124.79    9.00
  -6 -11   1   79.49    7.90
  -6 -11   1   77.09    7.20
   6 -11  -1   69.19    4.80
  -6 -11   1   81.59    7.30
   6  11  -1   75.49    7.70
  -6  11   1   68.19    4.40
  -5 -11   1   72.09    8.10
  -5 -11   1   84.09    7.90
  -5 -11   1   75.89    6.60
  -5 -11   1   74.59    6.60
   5  11  -1   76.39    7.20
  -4 -11   1   -0.30    2.30
  -4 -11   1   -0.70    1.90
  -4 -11   1   -1.10    2.00
  -4 -11   1    3.50    3.10
   4  11  -1    0.30    2.50
  -3 -11   1   14.80    2.60
  -3 -11   1   18.70    4.50
  -3 -11   1   17.40    2.70
  -3 -11   1   14.30    3.30
   3 -11  -1   18.60    4.40
   3  11  -1   14.00    3.20
  -2 -11   1    6.90    2.10
   2 -11  -1    7.50    3.30
  -2 -11   1    4.10    2.50
  -2 -11   1    8.20    3.50
  -2  11   1    8.00    2.10
  -2  11   1    6.80    1.80
   2  11  -1    6.70    2.40
  -1 -11   1   35.60    3.80
  -1 -11   1   29.80    3.60
   1 -11  -1   33.00    5.50
  -1 -11   1   28.40    5.20
   1 -11  -1   34.70    3.70
  -1  11   1   30.10    3.20
  -1  11   1   27.20    3.00
   1  11  -1   38.90    4.30
   1  11  -1   32.00    3.50
   1  11  -1   37.10    3.70
  -1  11   1   39.20    3.80
   0 -11  -1  211.38   10.70
   0 -11   1  190.38    7.60
   0 -11   1  203.08    8.50
   0 -11   1  180.68   10.30
   0 -11  -1  200.48    8.30
   0  11  -1  202.98    8.00
   0  11   1  195.08    8.00
   0  11  -1  204.78    7.50
   0  11   1  196.98    8.10
   0  11  -1  199.68    7.60
   0  11   1  204.58    8.50
  -1 -11  -1  118.39    6.50
   1 -11   1  120.99    8.20
  -1 -11  -1  124.29    8.10
   1 -11   1  125.59    6.80
   1  11   1  124.99    6.80
   1  11   1  113.59    6.20
  -2 -11  -1   11.00    3.80
   2 -11   1    5.50    2.90
   2 -11   1    2.70    2.90
  -2 -11  -1    6.00    2.70
   2  11   1    8.00    2.90
   2  11   1    4.80    2.40
  -3 -11  -1   58.39    6.90
  -3 -11  -1   62.59    6.20
  -3 -11  -1   59.19    5.10
   3 -11   1   60.19    7.10
   3 -11   1   73.49    6.80
  -3 -11  -1   54.59    4.80
   3  11   1   54.89    5.90
   3  11   1   58.39    6.10
  -4 -11  -1   17.90    3.40
  -4 -11  -1   16.80    3.80
  -4 -11  -1   17.20    3.40
  -4 -11  -1   27.20    5.20
   4  11   1   18.20    4.10
   4  11   1   23.50    4.50
  -5 -11  -1   10.70    3.40
  -5 -11  -1   11.80    3.60
  -5 -11  -1   12.60    3.80
   5  11   1   13.50    3.80
  -6 -11  -1   17.00    4.60
  -6 -11  -1   16.30    4.20
  -6  11  -1   24.80    4.50
   6  11   1   30.00    5.80
  -7 -11  -1   89.39    9.00
   7 -11   1   90.79    5.50
  -7  11  -1   86.99    5.30
   7  11   1  124.59   10.90
  -7  11  -1  101.89    8.80
  -8 -11  -1   11.50    4.80
   8 -11   1   19.70    3.60
   8  11   1   17.10    5.20
  -8  11  -1   26.80    5.60
  -8  11  -1   15.60    3.20
   9 -11   1    4.70    3.00
  -9 -11  -1    2.30    4.10
  -9  11  -1    2.60    2.70
 -10 -11  -1    6.80    5.10
  10 -11   1    8.50    4.00
 -10  11  -1    3.80    3.00
  11 -11   1   25.60    5.80
 -11 -11  -1   20.10    6.70
 -11  11  -1    8.80    4.00
 -11 -12   1    5.50    5.20
  11 -12  -1   -3.60    3.80
 -11  12   1   -0.10    3.30
 -10 -12   1   10.50    5.60
  10 -12  -1   12.60    4.30
 -10  12   1   12.00    4.10
   9 -12  -1   55.99    6.30
  -9 -12   1   53.09    8.00
  -9  12   1   34.70    4.70
  -8 -12   1   -6.10    3.00
   8 -12  -1    9.40    2.70
   8  12  -1    2.00    3.60
  -8  12   1    0.20    2.30
  -7 -12   1   49.80    6.90
  -7 -12   1   34.60    6.30
   7 -12  -1   43.00    4.70
  -7  12   1   30.80    3.70
   7  12  -1   48.20    6.60
  -6 -12   1   13.90    4.40
  -6 -12   1   18.70    4.50
  -6 -12   1   24.90    4.90
   6 -12  -1   27.20    3.50
   6  12  -1   26.60    5.20
  -6  12   1   19.80    2.90
  -5 -12   1   45.20    5.10
  -5 -12   1   41.70    5.90
  -5 -12   1   38.00    4.90
  -5 -12   1   55.09    7.20
   5  12  -1   33.70    5.20
  -4 -12   1   28.70    5.70
  -4 -12   1   19.90    3.50
  -4 -12   1    9.10    3.40
  -4 -12   1   17.20    3.30
   4  12  -1   13.40    3.60
  -3 -12   1   30.90    4.50
   3 -12  -1   29.20    5.40
  -3 -12   1   14.60    4.60
   3  12  -1   37.10    4.90
   2 -12  -1    1.80    3.10
  -2 -12   1    8.40    2.90
  -2 -12   1    4.40    2.00
   2 -12  -1    3.20    2.00
  -2 -12   1    5.50    3.50
  -2  12   1    2.40    1.60
  -2  12   1    4.20    2.00
   2  12  -1    5.60    2.40
  -2  12   1    3.40    1.70
  -1 -12   1   40.40    6.40
  -1 -12   1   47.30    4.80
   1 -12  -1   42.50    4.10
  -1 -12   1   38.50    4.20
   1 -12  -1   34.60    5.80
   1  12  -1   31.10    3.80
   1  12  -1   41.20    4.70
  -1  12   1   31.70    3.50
  -1  12   1   33.20    3.60
  -1  12   1   44.10    4.40
   0 -12  -1   53.29    6.90
   0 -12  -1   67.09    4.90
   0 -12   1   55.49    4.20
   0 -12   1   61.09    5.40
   0 -12   1   62.49    7.60
   0  12   1   63.39    4.90
   0  12  -1   54.59    4.00
   0  12  -1   65.69    4.20
   0  12  -1   61.39    4.60
   0  12   1   51.99    4.60
  -1 -12  -1   45.20    4.90
  -1 -12  -1   35.80    5.80
   1 -12   1   33.20    6.10
   1 -12   1   60.89    5.80
   1  12   1   50.69    5.50
   1  12   1   37.80    4.30
  -2 -12  -1  139.29    9.30
   2 -12   1  149.09    8.30
  -2 -12  -1  157.18    8.20
   2 -12   1  154.18    9.70
   2  12   1  143.99    7.80
   2  12   1  138.39    8.10
  -3 -12  -1   51.89    4.70
  -3 -12  -1   43.40    6.40
  -3 -12  -1   49.80    4.70
   3 -12   1   46.90    6.60
  -3 -12  -1   54.09    6.00
   3 -12   1   58.19    6.40
   3  12   1   54.99    6.20
   3  12   1   52.09    5.90
  -4 -12  -1    1.60    2.30
  -4 -12  -1    1.90    3.10
  -4 -12  -1    7.00    3.30
  -4 -12  -1    3.70    2.70
   4  12   1   -0.40    2.50
   4  12   1    3.70    3.00
  -5 -12  -1   35.20    5.60
  -5 -12  -1   35.90    5.30
  -5 -12  -1   35.70    4.90
  -5 -12  -1   32.40    6.00
   5  12   1   47.90    6.30
  -6 -12  -1   24.00    4.70
  -6 -12  -1   22.00    5.10
   6  12   1   24.70    5.20
  -7 -12  -1   16.00    5.10
  -7 -12  -1   22.10    4.80
   7  12   1   27.90    6.00
  -8 -12  -1   18.40    5.50
  -8  12  -1   18.40    3.30
   8  12   1   22.60    5.80
  -9 -12  -1    0.20    4.20
  -9  12  -1    1.80    2.50
 -10 -12  -1   23.00    6.60
 -10  12  -1   18.10    4.10
 -11 -12  -1   -0.60    5.40
 -11  12  -1    2.20    3.00
 -10 -13   1   17.90    6.40
 -10  13   1   11.60    3.70
  -9 -13   1    2.00    4.30
   9  13  -1   11.10    5.20
  -9  13   1    9.50    3.20
  -8 -13   1   26.60    6.00
   8  13  -1   34.50    6.50
  -8  13   1   32.80    4.20
  -7 -13   1   67.29    7.40
  -7 -13   1   33.00    6.70
  -7 -13   1   37.60    6.70
   7  13  -1   42.50    6.60
  -7  13   1   36.00    3.80
  -6 -13   1   39.10    5.30
  -6 -13   1   41.00    6.40
  -6 -13   1   48.00    5.80
  -6 -13   1   30.80    6.30
   6  13  -1   33.70    5.90
  -5 -13   1   -1.10    3.40
  -5 -13   1   -0.30    2.60
  -5 -13   1    0.50    3.10
  -5 -13   1    6.00    3.10
   5  13  -1    1.10    2.90
  -4 -13   1  166.18    9.50
  -4 -13   1  179.58    7.80
  -4 -13   1  156.78    7.80
  -4 -13   1  163.48   10.80
   4  13  -1  163.18    9.20
  -3 -13   1   99.79    9.90
  -3 -13   1  119.89    7.50
   3 -13  -1  114.69   10.30
   3  13  -1  117.49    7.40
   2 -13  -1   28.90    5.70
   2 -13  -1   30.20    3.70
  -2 -13   1   34.00    6.10
  -2 -13   1   24.30    4.00
   2  13  -1   23.80    3.80
  -2  13   1   34.90    3.50
  -2  13   1   29.90    3.70
  -1 -13   1   18.80    3.30
   1 -13  -1   12.00    4.40
  -1 -13   1   10.70    4.30
  -1 -13   1   18.10    3.40
   1 -13  -1   15.20    3.10
   1  13  -1   11.60    2.80
  -1  13   1   23.30    3.30
   1  13  -1   14.30    3.50
  -1  13   1   21.90    3.50
   0 -13   1   55.59    4.80
   0 -13  -1   67.79    8.10
   0 -13   1   60.49    5.70
   0 -13  -1   58.99    5.40
   0 -13   1   50.39    7.20
   0  13  -1   50.29    4.40
   0  13   1   68.59    5.90
   0  13   1   55.79    5.00
   0  13  -1   57.79    5.20
   0  13  -1   49.50    4.30
   1 -13   1   81.29    8.70
  -1 -13  -1   92.69    6.30
  -1 -13  -1   84.39    8.90
   1 -13   1  109.49    6.90
   1  13   1   91.79    6.00
   1  13   1   90.79    6.50
  -2 -13  -1   13.70    3.80
   2 -13   1    8.80    3.90
   2 -13   1   19.00    4.00
  -2 -13  -1   12.90    4.70
   2  13   1    8.20    3.30
   2  13   1   17.30    3.60
  -3 -13  -1   18.10    4.30
  -3 -13  -1   13.30    4.80
   3 -13   1   19.10    5.00
   3  13   1   12.40    3.50
   3  13   1   17.50    4.10
  -4 -13  -1   38.70    5.80
  -4 -13  -1   35.30    6.50
  -4 -13  -1   37.00    4.50
  -4 -13  -1   32.50    4.50
   4  13   1   35.70    5.30
  -5 -13  -1   93.19    7.00
  -5 -13  -1   76.59    8.90
  -5 -13  -1   86.59    8.70
  -5 -13  -1   90.09    7.50
   5  13   1   89.59    8.30
  -6 -13  -1    1.60    3.30
  -6 -13  -1    2.00    3.50
  -6 -13  -1    0.80    3.50
  -6 -13  -1   -2.20    3.20
   6  13   1   -2.80    2.80
  -7 -13  -1  153.48   10.00
  -7 -13  -1  132.69   12.00
  -7 -13  -1  120.39   11.70
   7  13   1  138.49   10.30
  -8 -13  -1   36.80    7.20
   8  13   1   28.50    6.20
  -9 -13  -1   39.50    7.40
  -9  13  -1   30.90    4.40
 -10 -13  -1    3.30    5.30
 -10  13  -1    3.90    3.50
 -10 -14   1   -4.00    4.50
 -10  14   1   -1.20    2.90
  -9 -14   1    2.70    4.70
  -9  14   1   -4.80    2.30
   9  14  -1    7.70    4.90
  -8 -14   1    3.00    4.20
  -8 -14   1   -3.10    3.90
  -8 -14   1    2.80    4.60
   8  14  -1   -3.50    3.50
  -8  14   1    1.70    2.30
  -7 -14   1    0.90    3.70
  -7 -14   1    2.10    4.20
  -7 -14   1   -3.60    3.90
  -7 -14   1    0.40    3.60
   7  14  -1    1.00    3.40
  -6 -14   1    0.10    3.40
  -6 -14   1    2.50    3.70
  -6 -14   1    5.20    3.40
  -6 -14   1    4.20    4.20
   6  14  -1    0.20    3.20
  -5 -14   1   17.50    3.70
  -5 -14   1   25.20    4.20
  -5 -14   1   27.50    5.20
  -5 -14   1   14.60    5.10
   5  14  -1   28.20    5.20
  -4 -14   1   77.79    7.60
  -4 -14   1   92.09   10.20
   4  14  -1   72.19    7.20
   3 -14  -1   14.70    5.20
  -3 -14   1   19.20    4.20
  -3 -14   1    9.00    4.60
   3  14  -1   15.30    3.80
   2 -14  -1   28.30    3.70
   2 -14  -1   23.90    5.60
  -2 -14   1   15.60    3.80
  -2 -14   1   17.60    5.00
   2  14  -1   19.10    3.60
  -2  14   1   25.10    3.80
  -2  14   1   16.10    2.90
  -1 -14   1  101.39    6.50
  -1 -14   1   93.29    9.80
   1 -14  -1  116.69    6.40
   1 -14  -1   93.19    9.80
  -1  14   1  102.29    5.90
  -1  14   1  112.39    6.40
   1  14  -1  102.99    6.20
   0 -14   1    4.10    2.60
   0 -14  -1    0.90    2.60
   0 -14  -1    6.60    4.40
   0 -14   1    6.70    4.50
   0 -14   1   11.10    3.40
   0  14   1    7.00    2.90
   0  14  -1    6.30    2.40
   0  14   1    5.10    3.00
   1 -14   1   20.40    3.00
   1 -14   1   22.70    5.50
   1 -14   1   23.60    4.50
  -1 -14  -1   19.10    5.40
  -1 -14  -1   29.20    4.40
   1  14   1   18.00    3.50
   1  14   1   25.90    4.40
  -2 -14  -1    3.30    3.90
   2 -14   1    2.00    3.70
   2 -14   1   16.20    4.20
  -2 -14  -1    7.60    3.70
   2  14   1    7.00    3.00
   2  14   1   13.30    4.10
  -3 -14  -1    0.10    3.10
  -3 -14  -1   -2.60    3.20
   3 -14   1    3.70    4.10
   3  14   1    1.90    2.90
   3  14   1   -0.30    3.10
  -4 -14  -1   14.60    3.40
  -4 -14  -1   14.60    5.30
  -4 -14  -1   20.80    4.60
   4  14   1   25.50    4.80
  -5 -14  -1   50.89    7.90
  -5 -14  -1   73.09    6.80
  -5 -14  -1   59.49    6.10
  -5 -14  -1   75.09    8.00
   5  14   1   68.19    8.20
  -6 -14  -1   34.60    6.90
  -6 -14  -1   36.70    6.30
  -6 -14  -1   34.30    5.50
  -6 -14  -1   40.10    6.00
   6  14   1   38.00    6.30
  -7 -14  -1   -0.40    3.90
  -7 -14  -1    6.50    4.60
  -7 -14  -1    4.50    4.10
   7  14   1    7.00    4.50
  -8 -14  -1    0.30    4.50
  -8 -14  -1    0.00    4.20
   8  14   1   -1.00    4.30
  -9 -14  -1    0.10    4.80
  -9  14  -1    2.10    2.50
  -9 -15   1    1.30    4.90
  -9 -15   1    0.90    4.50
   9  15  -1   -1.90    4.10
  -9  15   1    1.90    2.80
  -8 -15   1   -4.60    3.60
  -8 -15   1    0.50    4.00
  -8 -15   1   -6.30    3.80
   8  15  -1    2.30    4.50
  -7 -15   1   14.30    5.00
  -7 -15   1   15.00    4.70
  -7 -15   1   13.80    5.70
  -7 -15   1   13.40    4.10
   7  15  -1   12.90    4.70
  -6 -15   1    2.90    3.50
  -6 -15   1    4.40    4.60
  -6 -15   1    2.50    3.00
  -6 -15   1    4.00    4.20
   6  15  -1    1.90    3.70
  -5 -15   1    7.00    4.10
  -5 -15   1   10.50    5.20
   5  15  -1    4.80    3.50
  -4 -15   1   30.70    6.80
  -4 -15   1   27.90    5.50
   4  15  -1   29.20    5.40
  -3 -15   1   54.39    6.40
   3 -15  -1   47.10    7.70
  -3 -15   1   37.90    6.90
   3  15  -1   33.30    5.10
  -2 -15   1    5.10    4.80
   2 -15  -1    9.80    4.60
   2 -15  -1   11.30    3.00
  -2 -15   1    5.20    3.20
  -2  15   1   12.30    2.70
   2  15  -1    6.30    3.10
  -2  15   1   17.20    3.70
   1 -15  -1   20.10    3.60
  -1 -15   1   27.70    4.30
   1 -15  -1   25.10    5.90
  -1 -15   1   23.60    6.20
  -1  15   1   33.80    4.50
  -1  15   1   25.40    3.80
   1  15  -1   20.10    3.60
   0 -15  -1    2.40    2.80
   0 -15   1    6.30    2.60
   0 -15  -1    7.50    4.70
   0 -15   1    4.20    4.30
   0  15   1    2.00    2.60
   0  15   1    1.90    3.10
   0  15  -1    3.90    2.30
   1 -15   1   -0.20    2.80
  -1 -15  -1    6.70    4.40
   1 -15   1   -0.30    4.00
  -1 -15  -1    3.00    3.20
   1  15   1    3.60    3.40
  -1  15  -1    6.40    2.10
   1  15   1    4.00    2.60
   2 -15   1   -1.20    3.80
  -2 -15  -1    3.90    4.30
  -2 -15  -1    7.20    3.90
   2  15   1    2.60    3.40
   2  15   1    0.50    2.70
  -3 -15  -1   18.10    5.60
  -3 -15  -1   19.70    4.90
   3 -15   1   17.80    5.50
   3  15   1   20.40    5.20
   3  15   1   33.40    5.30
  -4 -15  -1   44.20    7.40
  -4 -15  -1   36.70    6.00
   4  15   1   34.80    5.80
  -5 -15  -1   16.90    5.70
  -5 -15  -1   15.60    5.00
  -5 -15  -1   16.30    4.10
  -5 -15  -1   15.40    3.70
   5  15   1   22.20    5.40
  -6 -15  -1   -0.80    3.60
  -6 -15  -1    3.60    4.00
  -6 -15  -1    2.90    3.50
  -6 -15  -1   -3.70    3.60
   6  15   1   -4.30    3.40
  -7 -15  -1    4.50    4.40
  -7 -15  -1   -1.10    4.10
  -7 -15  -1    4.30    4.30
   7  15   1   -4.00    3.50
  -8 -15  -1   19.90    6.20
  -8 -15  -1   26.70    6.60
   8  15   1   26.70    6.60
  -9 -15  -1    0.90    5.30
  -9 -15  -1    2.40    5.40
  -8 -16   1    1.40    4.00
  -8 -16   1   -0.10    4.30
  -8 -16   1   -1.50    4.50
   8  16  -1    1.70    4.90
  -7 -16   1   -1.70    4.40
  -7 -16   1    4.90    4.50
  -7 -16   1    2.60    3.40
  -7 -16   1   -2.40    3.80
   7  16  -1    1.00    3.70
  -6 -16   1    9.70    5.70
  -6 -16   1    8.40    4.50
  -6 -16   1   16.10    4.20
   6  16  -1   13.70    4.60
  -5 -16   1   48.10    6.80
  -5 -16   1   58.59    8.80
   5  16  -1   38.90    6.60
  -4 -16   1    3.90    5.10
  -4 -16   1   11.20    4.30
   4  16  -1    4.30    3.60
  -3 -16   1    2.00    4.80
  -3 -16   1    5.60    3.60
   3 -16  -1    1.40    4.20
   3  16  -1   -1.50    2.60
   2 -16  -1   99.49    6.20
   2 -16  -1   83.89   10.10
  -2 -16   1   78.89    7.40
  -2 -16   1   91.59   10.40
  -2  16   1   89.09    5.60
   2  16  -1   95.59    6.90
   1 -16  -1   47.90    7.90
  -1 -16   1   36.50    7.40
   1 -16  -1   39.70    4.80
  -1 -16   1   34.50    4.80
   1  16  -1   25.70    4.10
  -1  16   1   32.90    4.10
  -1  16   1   56.89    6.30
   0 -16  -1   11.20    5.20
   0 -16   1    5.10    4.80
   0 -16   1    2.70    2.90
   0 -16  -1    2.10    3.10
   0  16   1    5.80    2.70
   0  16  -1    6.60    2.60
   0  16   1    6.70    3.60
  -1 -16  -1   10.60    5.20
   1 -16   1    4.60    4.90
  -1 -16  -1    5.30    3.60
   1  16   1   11.90    4.10
   1  16   1    8.70    3.40
   2 -16   1    0.80    4.50
  -2 -16  -1    6.70    3.90
  -2 -16  -1    6.70    4.70
   2  16   1    5.70    3.10
   2  16   1    3.00    3.60
   3 -16   1   39.70    7.70
  -3 -16  -1   38.80    6.20
  -3 -16  -1   31.60    7.10
   3  16   1   22.20    4.30
  -4 -16  -1    9.00    4.30
  -4 -16  -1    1.40    4.30
   4  16   1    1.90    3.70
  -5 -16  -1   30.00    6.60
  -5 -16  -1   36.40    6.40
   5  16   1   28.50    5.80
  -6 -16  -1   20.90    6.60
  -6 -16  -1   22.10    4.90
  -6 -16  -1   14.40    4.20
  -6 -16  -1   17.40    5.40
   6  16   1   22.90    5.80
  -7 -16  -1   13.50    5.40
  -7 -16  -1   28.20    7.00
  -7 -16  -1   38.30    6.30
  -7 -16  -1   32.80    5.70
   7  16   1   35.30    6.60
  -8 -16  -1   -3.40    4.30
  -8 -16  -1   -1.10    4.50
  -8 -16  -1    5.60    5.00
   8  16   1    2.10    4.40
  -7 -17   1   -1.10    4.50
  -7 -17   1    1.50    3.40
  -7 -17   1    2.80    4.00
  -7 -17   1   -5.60    4.00
   7  17  -1   10.50    4.90
  -6 -17   1   10.50    5.70
  -6 -17   1    2.80    4.60
   6  17  -1    9.00    4.30
  -5 -17   1   -4.90    4.50
  -5 -17   1   -2.10    3.80
   5  17  -1    2.00    3.50
  -4 -17   1   12.30    5.60
  -4 -17   1    4.30    4.00
   4  17  -1   -3.20    3.30
  -3 -17   1   10.60    4.70
  -3 -17   1    5.40    5.30
   3 -17  -1   17.40    6.20
   3  17  -1   12.60    4.00
  -2 -17   1   17.20    6.50
  -2 -17   1   14.80    4.00
   2 -17  -1   17.50    6.20
   2  17  -1   10.70    3.80
  -2  17   1   12.80    3.00
  -1 -17   1   21.30    7.00
  -1 -17   1   15.90    4.00
   1 -17  -1   22.60    4.30
   1 -17  -1   10.40    5.40
   1  17  -1    7.80    3.00
  -1  17   1   13.90    3.40
   0 -17   1    8.70    3.30
   0 -17  -1   -1.50    3.20
   0 -17   1    7.30    5.50
   0 -17  -1   -0.10    4.30
   0  17  -1    3.10    2.60
   0  17   1    5.20    3.80
   0  17   1    4.30    2.70
  -1 -17  -1   13.00    6.00
  -1 -17  -1    9.10    3.80
   1 -17   1   13.00    5.90
   1  17   1   10.80    4.60
   1  17   1    8.00    3.40
  -1  17  -1   11.50    2.80
  -2 -17  -1    3.20    4.00
  -2 -17  -1    7.30    5.00
   2 -17   1    3.80    4.80
   2  17   1   10.80    4.60
   2  17   1   10.00    3.80
  -3 -17  -1   42.60    8.50
   3 -17   1   35.60    7.60
  -3 -17  -1   35.40    5.90
   3  17   1   37.20    6.10
  -4 -17  -1   12.10    5.90
  -4 -17  -1   12.30    4.70
   4  17   1   15.90    5.00
  -5 -17  -1    6.10    4.70
  -5 -17  -1    4.60    5.40
   5  17   1    4.70    4.10
  -6 -17  -1    0.60    3.60
  -6 -17  -1    1.40    4.20
  -6 -17  -1    2.90    5.10
   6  17   1    2.10    3.90
  -7 -17  -1   -2.70    4.20
  -7 -17  -1    2.10    5.10
  -7 -17  -1   -1.00    3.60
  -7 -17  -1    3.60    5.10
   7  17   1   -2.50    4.20
  -6 -18   1   17.90    6.70
  -6 -18   1   -0.90    4.00
   6  18  -1    7.00    4.60
  -5 -18   1    7.10    4.40
  -5 -18   1    3.80    5.10
   5  18  -1   10.70    4.70
  -4 -18   1    3.40    4.00
  -4 -18   1   -4.10    4.30
   4  18  -1   -5.00    3.00
   3 -18  -1   -2.60    4.60
  -3 -18   1    7.50    4.30
  -3 -18   1    2.70    5.00
   3  18  -1    4.20    3.50
   2 -18  -1   -1.30    5.00
  -2 -18   1    2.90    3.80
  -2 -18   1    5.10    5.20
  -2  18   1    0.70    2.50
   2  18  -1    0.00    2.80
   1 -18  -1    5.30    5.30
  -1 -18   1   19.20    4.50
  -1 -18   1   14.70    6.80
  -1  18   1   10.70    3.20
   1  18  -1   12.20    3.50
   0 -18  -1    1.40    4.70
   0 -18   1    8.50    5.40
   0 -18  -1   -0.90    3.40
   0  18   1    5.50    3.20
   0  18   1   -3.50    3.80
   0  18  -1    2.70    3.00
  -1 -18  -1   20.20    6.80
   1 -18   1   13.70    6.00
  -1 -18  -1   10.30    4.30
   1  18   1    6.10    4.70
   1  18   1    1.80    3.40
  -1  18  -1    9.10    3.00
   2 -18   1   10.60    6.20
  -2 -18  -1    6.40    5.50
  -2 -18  -1   13.10    4.70
   2  18   1    6.00    3.90
  -3 -18  -1    9.70    5.70
  -3 -18  -1    7.90    4.20
   3 -18   1    7.80    5.60
   3  18   1    5.80    3.70
  -4 -18  -1   -5.50    3.50
  -4 -18  -1    1.80    4.90
   4  18   1    2.80    3.50
  -5 -18  -1   -4.40    4.90
  -5 -18  -1    0.10    4.20
   5  18   1   -3.90    3.10
  -6 -18  -1   19.10    6.30
  -6 -18  -1    8.50    6.20
   6  18   1    3.90    4.30
  -4 -19   1    7.80    6.20
  -4 -19   1   10.70    4.80
   4  19  -1    6.50    4.10
  -3 -19   1   14.40    6.40
  -3 -19   1   16.00    5.10
   3 -19  -1    7.70    6.20
   3  19  -1   17.60    4.90
  -2 -19   1   -0.60    3.60
   2 -19  -1   -0.60    4.90
  -2 -19   1    2.40    5.20
  -2  19   1    1.80    2.70
   2  19  -1    1.60    3.30
  -1 -19   1   -2.60    3.20
  -1 -19   1    1.20    5.00
   1 -19  -1    3.80    5.20
  -1  19   1    1.00    2.80
   1  19  -1    0.40    3.10
   0 -19   1   54.99   10.10
   0 -19  -1   57.99    6.90
   0 -19  -1   43.90    8.80
   0  19   1   47.90    5.80
   0  19  -1   52.99    5.60
   1 -19   1   51.69   10.00
  -1 -19  -1   51.39    9.40
  -1 -19  -1   48.20    6.60
   1  19   1   57.09    6.70
  -1  19  -1   44.30    4.80
  -2 -19  -1   -9.20    4.40
  -2 -19  -1    1.30    3.60
   2 -19   1   -0.50    5.20
   2  19   1   -1.10    3.40
   3 -19   1    1.30    5.90
  -3 -19  -1   16.00    5.20
  -3 -19  -1   15.40    6.40
   3  19   1   13.50    4.70
  -4 -19  -1   14.20    5.70
  -4 -19  -1   -4.90    5.10
   4  19   1    5.00    4.00
   2 -20  -1   -0.40    5.10
  -2 -20   1    6.60    6.50
  -2 -20   1    5.10    4.20
  -2  20   1    6.90    3.10
   2  20  -1    3.50    3.30
  -1 -20   1   -4.80    4.80
   1 -20  -1    5.00    5.80
   1  20  -1    2.10    3.30
  -1  20   1    0.80    3.00
   0 -20   1   -1.50    5.10
   0 -20  -1   -3.80    4.70
   0  20   1   -2.70    2.80
   0  20  -1   -1.00    2.80
  -1 -20  -1   24.60    7.30
  -1 -20  -1   22.90    5.40
   1 -20   1   20.70    7.40
   1  20   1   22.20    4.70
   2 -20   1   -3.80    5.30
  -2 -20  -1    4.30    4.60
  -2 -20  -1   -4.30    4.90
   2  20   1    3.40    3.50
  14   0  -2   24.80    7.60
  13   0  -2    8.10    5.30
 -12   0   2   91.69   10.20
  12   0  -2   63.39    8.40
 -11   0   2    4.30    3.30
  11   0  -2    5.50    3.90
  10   0  -2   91.69    8.50
  10   0  -2   73.99    8.20
 -10   0   2   90.09    8.30
 -10   0   2   94.49    9.00
   9   0  -2    3.00    2.40
  -9   0   2    9.00    3.20
   9   0  -2    5.00    3.40
  -9   0   2    3.10    3.00
   8   0  -2   65.29    7.20
  -8   0   2   63.89    6.00
  -8   0   2   65.29    6.80
  -8   0   2   63.99    6.60
   8   0  -2   62.29    6.40
   8   0  -2   69.69    6.50
  -7   0   2  427.16   15.30
   7   0  -2  413.06   15.20
   7   0  -2  407.36   15.20
   7   0  -2  413.26   15.60
  -7   0   2  404.76   14.70
  -7   0   2  387.46   15.30
   6   0  -2  144.79    7.10
  -6   0   2  153.78    7.40
   6   0  -2  162.28    7.50
   6   0  -2  144.69    7.30
  -6   0   2  151.28    7.20
   6   0  -2  151.08    7.60
  -6   0   2  144.99    7.50
  -5   0   2   36.80    3.80
   5   0  -2   43.50    4.20
  -5   0   2   53.19    4.40
   5   0  -2   37.80    4.40
  -5   0   2   39.30    4.00
   5   0  -2   45.70    4.40
   5   0  -2   36.70    3.90
   4   0  -2   10.60    2.20
   4   0  -2    9.30    2.00
   4   0  -2   14.50    2.40
  -4   0   2   14.60    2.40
   4   0  -2   12.90    2.30
  -4   0   2   13.20    2.40
   3   0  -2  663.63   20.30
   3   0  -2  686.73   20.20
   3   0  -2  660.73   20.30
  -3   0   2  680.73   19.70
   3   0  -2  654.83   19.70
  -3   0   2  692.53   20.10
  -2   0   2   73.99    3.40
   2   0  -2   76.09    3.50
  -2   0   2   78.89    3.60
   2   0  -2   73.89    3.60
   1   0  -2    5.90    1.10
   1   0  -2    5.20    1.10
  -1   0   2    5.30    1.10
  -1   0   2    5.90    1.10
   0   0  -2  488.25   13.90
   0   0   2  485.15   14.10
   0   0   2  506.35   13.60
   1   0   2 6686.53  191.28
   1   0   2 7120.19  192.48
  -1   0  -2 6974.70  190.78
  -1   0  -2 7100.29  185.78
   1   0   2 6924.11  190.28
   1   0   2 6962.10  192.88
   1   0   2 7174.08  183.48
   2   0   2   41.20    2.50
   2   0   2   40.80    2.60
  -2   0  -2   45.30    2.80
   2   0   2   40.90    2.80
   2   0   2   40.10    2.60
   2   0   2   43.20    2.70
  -2   0  -2   41.50    2.60
  -3   0  -2   12.90    1.90
   3   0   2   12.40    1.90
   3   0   2   12.10    2.10
  -3   0  -2   15.70    2.20
   3   0   2    8.10    1.80
   3   0   2   13.60    2.00
  -3   0  -2    7.90    1.80
   3   0   2   13.10    2.00
   4   0   2   64.79    4.00
   4   0   2   67.09    4.20
  -4   0  -2   63.79    4.10
  -4   0  -2   70.69    4.50
  -4   0  -2   60.99    3.80
   4   0   2   60.29    3.90
  -5   0  -2  726.23   23.00
   5   0   2  716.43   22.60
  -5   0  -2  721.03   22.30
   5   0   2  687.93   22.60
   5   0   2  730.03   22.60
  -5   0  -2  717.93   22.00
   6   0   2  171.68    7.90
  -6   0  -2  176.98    8.00
   6   0   2  167.78    7.80
   6   0   2  161.88    8.20
  -6   0  -2  172.08    7.90
  -6   0  -2  171.28    8.50
  -7   0  -2   90.49    6.50
   7   0   2   92.49    6.00
  -7   0  -2   80.89    5.80
   7   0   2   93.39    6.00
   7   0   2   95.09    6.30
  -7   0  -2   95.89    6.00
   8   0   2  144.99    8.00
  -8   0  -2  145.09    8.80
   8   0   2  114.89    7.90
   8   0   2  140.99    7.90
  -8   0  -2  127.49    7.80
  -8   0  -2  134.19    7.90
   9   0   2   63.39    7.20
  -9   0  -2   49.30    6.50
   9   0   2   65.49    7.00
  -9   0  -2   59.79    7.20
   9   0   2   51.39    6.10
  10   0   2   15.70    4.70
 -10   0  -2   10.40    3.70
  10   0   2    9.40    3.60
 -10   0  -2   10.30    4.00
  11   0   2   56.49    8.30
  11   0   2   47.40    6.80
 -11   0  -2   60.59    8.30
 -11   0  -2   53.99    7.30
 -12   0  -2   32.30    6.30
 -12   0  -2   16.70    5.70
  12   0   2   35.90    7.20
  13   0   2   -0.80    4.10
 -13   0  -2    7.10    4.30
 -13   0  -2    0.50    3.80
  14  -1  -2    9.10    5.90
  14   1  -2    0.60    5.40
  13  -1  -2    9.00    5.40
 -13   1   2    5.10    4.00
  13   1  -2   -0.70    4.70
  12  -1  -2   16.00    5.20
 -12  -1   2   17.90    5.00
  12  -1  -2   11.70    4.30
  12   1  -2   13.90    5.10
 -12   1   2   21.90    5.60
  11  -1  -2  127.19   12.00
 -11  -1   2  125.19   11.50
  11  -1  -2  116.39    8.70
 -11   1   2  119.79   10.00
  11   1  -2  115.09   11.60
  10  -1  -2    6.50    3.20
 -10  -1   2    2.50    3.10
  10  -1  -2    5.70    3.70
 -10  -1   2    5.70    3.60
 -10   1   2   12.00    4.40
  10   1  -2    1.80    3.40
 -10   1   2    8.40    3.30
   9  -1  -2   17.50    4.10
  -9  -1   2   21.30    4.50
   9  -1  -2   20.20    4.10
   9  -1  -2   17.10    3.80
  -9  -1   2    8.50    3.30
   9   1  -2   17.60    4.20
   9   1  -2   20.60    4.90
  -9   1   2   20.50    4.10
  -9   1   2   28.40    5.00
  -9   1   2   20.40    4.40
  -8  -1   2   58.29    6.70
   8  -1  -2   63.59    6.00
   8  -1  -2   65.09    6.90
   8  -1  -2   72.99    6.60
  -8  -1   2   59.89    6.10
  -8   1   2   66.59    6.00
   8   1  -2   66.99    6.30
  -8   1   2   65.39    6.70
  -8   1   2   64.69    6.20
   8   1  -2   49.99    6.70
   7  -1  -2    7.20    2.80
  -7  -1   2    8.20    2.50
  -7  -1   2   11.80    3.00
   7  -1  -2    7.20    2.40
   7  -1  -2   13.60    2.80
  -7   1   2   12.40    2.80
   7   1  -2   12.30    3.10
  -7   1   2   10.80    2.70
   7   1  -2   13.30    2.80
  -7   1   2    8.40    2.70
   7   1  -2    8.00    2.60
   7   1  -2   10.20    3.10
   6  -1  -2   26.90    3.70
  -6  -1   2   24.40    3.40
  -6  -1   2   23.20    3.80
   6  -1  -2   30.30    4.20
   6  -1  -2   28.90    3.50
   6   1  -2   29.00    3.90
   6   1  -2   20.90    3.20
  -6   1   2   25.60    3.50
   6   1  -2   27.00    4.20
  -6   1   2   24.60    3.60
   6   1  -2   24.60    3.80
  -6   1   2   32.80    3.70
   5  -1  -2   62.49    4.20
   5  -1  -2   59.19    4.30
  -5  -1   2   70.89    4.70
  -5  -1   2   65.39    4.30
   5  -1  -2   72.39    4.30
   5   1  -2   66.69    4.30
   5   1  -2   71.69    4.80
  -5   1   2   63.69    4.20
   5   1  -2   59.49    4.30
   5   1  -2   71.99    4.70
  -5   1   2   59.29    4.20
  -5   1   2   65.59    4.40
   4  -1  -2   13.90    2.20
   4  -1  -2   22.30    2.90
  -4  -1   2   15.10    2.50
  -4  -1   2   17.30    2.50
   4  -1  -2   21.10    2.70
   4   1  -2   20.90    2.80
   4   1  -2   16.60    2.40
  -4   1   2   23.30    2.80
   4   1  -2   19.70    3.00
  -4   1   2   19.20    2.90
  -4   1   2   19.00    2.60
  -3  -1   2  190.08    7.20
  -3  -1   2  191.68    6.90
   3  -1  -2  189.08    7.00
   3  -1  -2  194.18    7.00
   3  -1  -2  176.98    6.90
  -3   1   2  188.38    6.90
  -3   1   2  179.18    6.60
  -3   1   2  190.18    6.80
   3   1  -2  171.18    7.10
   3   1  -2  200.48    7.10
   2  -1  -2   46.30    2.70
  -2  -1   2   46.60    2.90
   2  -1  -2   43.90    2.70
  -2  -1   2   43.20    2.70
   2  -1  -2   47.10    2.80
   2   1  -2   43.80    2.80
  -2   1   2   45.20    2.70
  -2   1   2   52.49    2.70
   2   1  -2   47.00    2.90
   1  -1  -2  269.87    8.60
  -1  -1   2  268.97    8.50
  -1  -1   2  272.47    8.50
   1  -1  -2  274.07    8.50
  -1   1   2  286.07    8.50
   1   1  -2  278.07    8.50
   1   1  -2  265.27    8.30
  -1   1   2  277.37    8.30
   0  -1   2    0.30    0.60
   0  -1   2    0.90    0.70
   0  -1   2    1.70    0.90
   0  -1   2   -0.20    0.50
   0  -1  -2   -0.70    0.70
   0   1   2    0.80    0.90
   0   1   2    0.20    0.80
   0   1   2    0.40    0.70
   0   1  -2    0.10    0.60
   0   1  -2    0.30    0.60
   1  -1   2  248.18    7.80
  -1  -1  -2  268.17    8.10
   1  -1   2  236.68    7.80
   1  -1   2  252.57    7.80
   1  -1   2  258.97    7.80
  -1   1  -2  261.27    7.70
   1   1   2  253.97    8.30
   1   1   2  259.47    8.40
   1   1   2  250.77    8.10
  -1   1  -2  256.67    7.70
   1   1   2  257.27    7.40
  -2  -1  -2  104.49    4.50
  -2  -1  -2  119.89    4.90
   2  -1   2  115.09    4.40
   2  -1   2  113.59    4.50
   2  -1   2  114.09    4.60
   2  -1   2  115.09    4.30
  -2  -1  -2  112.89    4.80
  -2   1  -2  108.29    4.30
  -2   1  -2  109.39    4.30
   2   1   2  111.39    4.10
   2   1   2  110.19    4.80
   2   1   2  109.39    4.90
   2   1   2  113.09    4.70
   3  -1   2   32.00    3.30
   3  -1   2   29.60    2.60
   3  -1   2   30.50    2.90
  -3  -1  -2   29.70    3.10
  -3  -1  -2   37.70    3.60
  -3  -1  -2   35.30    3.20
   3  -1   2   33.20    2.80
   3   1   2   31.70    3.20
  -3   1  -2   36.00    3.40
   3   1   2   35.50    3.60
   3   1   2   33.70    3.50
  -3   1  -2   27.00    2.60
   3   1   2   25.70    2.70
   3   1   2   36.60    3.40
   3   1   2   33.70    3.10
  -3   1  -2   31.00    2.80
   3   1   2   31.10    2.70
  -4  -1  -2   -0.10    1.30
  -4  -1  -2    1.50    1.60
   4  -1   2   -0.10    1.30
   4  -1   2    0.40    1.10
  -4  -1  -2    0.50    1.20
   4  -1   2    1.50    1.30
   4  -1   2    0.00    1.10
  -4   1  -2    0.00    1.20
   4   1   2    0.10    1.20
   4   1   2   -0.60    1.20
   4   1   2    2.00    1.40
  -4   1  -2   -1.20    1.10
   4   1   2    0.50    1.20
  -4   1  -2    0.00    1.40
   5  -1   2  298.37   11.40
  -5  -1  -2  317.17   12.00
   5  -1   2  328.07   11.20
   5  -1   2  307.57   11.10
  -5  -1  -2  299.77   11.30
  -5  -1  -2  319.87   11.70
   5   1   2  309.47   11.90
  -5   1  -2  310.47   11.00
   5   1   2  284.37   11.30
   5   1   2  321.37   11.70
   5   1   2  307.07   11.30
  -5   1  -2  313.37   11.90
  -5   1  -2  309.47   11.00
  -6  -1  -2   98.69    5.60
  -6  -1  -2   83.49    5.50
  -6  -1  -2   70.59    6.30
   6  -1   2   73.59    5.30
   6  -1   2   72.89    4.80
   6  -1   2   77.69    4.90
   6   1   2   75.59    5.50
   6   1   2   70.69    5.40
   6   1   2   88.79    5.50
   6   1   2   80.89    5.30
  -6   1  -2   80.59    5.70
  -6   1  -2   86.79    5.10
  -6   1  -2   74.79    4.90
  -7  -1  -2    9.50    3.10
   7  -1   2    7.00    2.30
  -7  -1  -2    5.50    2.40
   7  -1   2    7.50    2.40
  -7  -1  -2   11.30    3.00
   7  -1   2    6.60    2.50
   7   1   2    9.80    2.90
   7   1   2    3.50    2.00
   7   1   2    4.60    2.00
  -7   1  -2    7.10    2.40
  -7   1  -2    3.90    2.30
  -7   1  -2    3.70    2.30
  -8  -1  -2   10.50    3.20
   8  -1   2   19.00    3.60
  -8  -1  -2   13.70    3.70
  -8  -1  -2   12.10    3.70
   8  -1   2   13.00    3.50
   8  -1   2   14.20    3.40
   8   1   2   13.90    3.50
  -8   1  -2   10.70    3.20
   8   1   2   18.10    3.90
  -8   1  -2   12.10    3.50
  -8   1  -2   16.10    3.50
   8   1   2   13.80    3.40
   9  -1   2   75.29    7.20
  -9  -1  -2   85.79    8.40
  -9  -1  -2   64.59    7.50
   9  -1   2   82.99    8.60
  -9  -1  -2   57.79    6.30
   9  -1   2   62.69    6.50
  -9   1  -2   73.29    7.80
   9   1   2   58.99    6.40
   9   1   2   55.39    7.10
  -9   1  -2   60.69    7.10
 -10  -1  -2   73.69    8.50
 -10  -1  -2   80.69    8.50
  10  -1   2   75.59    7.40
  10  -1   2   83.89    7.60
  10  -1   2   65.19    7.90
  10   1   2   83.69    8.60
  10   1   2   65.89    7.80
 -10   1  -2   53.59    7.50
 -10   1  -2   62.69    6.90
  11  -1   2   34.40    6.60
 -11  -1  -2   26.00    5.90
  11  -1   2   23.50    4.90
 -11  -1  -2   26.70    5.90
  11   1   2   20.40    5.30
 -11   1  -2   28.00    6.20
 -11   1  -2   24.10    5.20
 -12  -1  -2    0.70    3.80
 -12  -1  -2   -2.10    3.80
  12  -1   2    5.60    4.20
  12  -1   2    2.30    3.60
  12   1   2    2.10    3.90
 -12   1  -2    9.80    4.80
 -12   1  -2   -1.20    3.60
  13  -1   2   18.60    6.10
 -13  -1  -2   17.60    5.90
  13  -1   2   21.10    5.60
 -13   1  -2   23.90    7.00
 -13   1  -2   16.80    5.70
  13   1   2   14.70    5.90
  13  -2  -2    1.20    4.60
  13  -2  -2    3.20    3.90
  13   2  -2   -3.20    4.20
 -13   2   2   -1.40    3.80
  12  -2  -2    6.00    3.90
  12  -2  -2    5.20    3.90
  12   2  -2    9.00    4.60
 -12   2   2    9.00    4.90
  11  -2  -2    6.90    4.20
 -11  -2   2   17.70    5.10
  11  -2  -2   13.70    4.00
 -11  -2   2    7.90    4.80
  11   2  -2   12.90    4.80
 -11   2   2   20.30    5.30
 -11   2   2    8.60    4.20
 -10  -2   2   15.20    4.30
  10  -2  -2   20.10    4.20
 -10  -2   2   16.60    4.80
  10  -2  -2   21.30    4.20
  10  -2  -2   10.70    4.10
  10   2  -2    7.10    3.60
 -10   2   2   11.30    4.00
 -10   2   2   18.50    4.90
   9  -2  -2   58.49    6.10
  -9  -2   2   41.80    5.70
   9  -2  -2   48.70    5.40
   9  -2  -2   47.30    6.30
  -9  -2   2   50.09    7.00
   9   2  -2   53.39    7.40
  -9   2   2   43.40    5.50
  -9   2   2   47.90    6.40
  -8  -2   2   88.39    6.40
  -8  -2   2  103.89    8.60
   8  -2  -2   92.39    6.10
   8  -2  -2   96.39    7.00
   8  -2  -2   90.09    6.20
   8   2  -2  108.99    7.60
  -8   2   2   93.79    6.80
  -8   2   2   87.29    6.30
  -8   2   2   95.69    6.40
   8   2  -2   95.29    6.80
  -7  -2   2  109.99    6.90
   7  -2  -2  100.89    5.90
   7  -2  -2   98.69    6.60
  -7  -2   2  114.99    6.60
   7  -2  -2  108.99    6.20
   7   2  -2  110.29    6.60
  -7   2   2  108.89    6.60
   7   2  -2  108.79    6.80
  -7   2   2  105.49    6.20
  -7   2   2  107.79    6.20
   7   2  -2  103.09    7.00
  -6  -2   2   43.50    4.40
   6  -2  -2   43.30    4.10
  -6  -2   2   39.90    4.50
   6  -2  -2   45.60    4.20
   6  -2  -2   42.10    4.60
  -6   2   2   43.50    4.20
  -6   2   2   45.30    4.60
   6   2  -2   45.40    4.80
   6   2  -2   31.90    3.90
   6   2  -2   41.70    4.70
  -6   2   2   38.20    4.00
   6   2  -2   32.10    4.10
   5  -2  -2    0.10    1.30
   5  -2  -2    2.70    1.80
  -5  -2   2    1.30    1.40
  -5  -2   2    4.10    2.20
   5  -2  -2    0.10    1.30
   5   2  -2    0.20    1.30
  -5   2   2    3.30    1.80
  -5   2   2    0.40    1.60
   5   2  -2    2.00    1.80
   5   2  -2   -0.80    1.60
  -5   2   2    1.20    1.40
  -4  -2   2   37.70    3.40
   4  -2  -2   47.60    4.00
   4  -2  -2   38.00    3.40
  -4  -2   2   37.30    3.90
   4  -2  -2   36.90    3.20
  -4   2   2   35.50    3.40
  -4   2   2   39.60    3.40
  -4   2   2   44.10    3.70
   4   2  -2   44.60    4.00
   4   2  -2   32.40    3.40
   3  -2  -2  257.47    8.70
   3  -2  -2  250.27    8.50
  -3  -2   2  249.58    9.10
  -3  -2   2  243.58    9.10
   3  -2  -2  253.87    8.60
  -3  -2   2  245.08    8.70
   3   2  -2  251.47    8.90
   3   2  -2  249.18    9.10
  -3   2   2  264.77    8.50
  -3   2   2  253.77    8.40
  -3   2   2  261.97    8.60
   2  -2  -2    4.50    1.20
  -2  -2   2    2.90    1.50
  -2  -2   2    5.40    1.50
   2  -2  -2    4.90    1.30
  -2  -2   2    5.00    1.30
   2  -2  -2    3.80    1.10
  -2   2   2    3.40    1.00
  -2   2   2    3.20    1.10
   2   2  -2    0.40    1.00
   2   2  -2    5.20    1.40
  -2   2   2    5.90    1.40
   1  -2  -2   34.80    2.10
  -1  -2   2   35.20    2.20
  -1  -2   2   36.10    2.30
  -1  -2   2   36.50    2.10
   1  -2  -2   36.70    2.30
   1  -2  -2   33.60    2.10
  -1  -2   2   34.20    2.10
  -1   2   2   36.60    2.20
   1   2  -2   35.10    2.10
  -1   2   2   37.20    2.20
   1   2  -2   36.90    2.20
  -1   2   2   35.00    2.10
   0  -2  -2  292.77    9.30
   0  -2  -2  303.77    9.30
   0  -2  -2  288.07    9.30
   0  -2   2  291.57    9.00
   0  -2   2  290.07    8.60
   0  -2   2  301.77    9.20
   0  -2   2  294.07    8.60
   0  -2   2  296.97    8.60
   0   2  -2  286.57    8.60
   0   2  -2  302.67    8.60
   0   2  -2  293.97    8.50
   0   2   2  304.47    9.10
   0   2   2  300.97    9.40
   0   2   2  301.67    9.20
  -1  -2  -2  220.08    7.00
  -1  -2  -2  205.58    7.20
   1  -2   2  219.58    6.60
   1  -2   2  208.38    7.10
   1  -2   2  218.08    7.30
   1   2   2  216.08    7.50
  -1   2  -2  217.48    6.50
   1   2   2  229.98    7.40
   1   2   2  217.28    7.50
  -1   2  -2  219.78    6.50
  -2  -2  -2   16.90    2.10
  -2  -2  -2   17.50    2.30
   2  -2   2   19.90    2.50
   2  -2   2   17.50    1.90
  -2  -2  -2   24.60    2.50
   2  -2   2   19.10    1.50
  -2   2  -2   21.50    1.70
   2   2   2   23.00    2.80
   2   2   2   20.40    1.70
   2   2   2   17.90    2.30
   2   2   2   14.30    2.00
  -2   2  -2   21.60    1.90
  -2   2  -2   19.50    1.80
   3  -2   2   26.90    2.30
  -3  -2  -2   28.30    2.90
   3  -2   2   38.80    3.70
  -3  -2  -2   33.50    3.40
   3  -2   2   29.10    2.40
   3  -2   2   33.00    2.90
  -3  -2  -2   28.70    3.10
   3   2   2   39.80    3.80
   3   2   2   26.90    3.20
  -3   2  -2   29.90    2.60
  -3   2  -2   32.60    2.50
   3   2   2   30.30    3.40
  -3   2  -2   26.20    2.50
   3   2   2   31.00    3.40
   4  -2   2   -0.10    1.00
   4  -2   2    2.10    1.50
   4  -2   2    1.90    1.20
  -4  -2  -2    1.60    1.60
  -4  -2  -2    0.90    1.30
   4  -2   2    2.60    1.50
  -4  -2  -2    0.10    1.40
   4   2   2    3.00    1.70
  -4   2  -2    1.40    1.20
   4   2   2    4.20    1.80
   4   2   2    3.30    1.70
   4   2   2    0.60    1.40
  -4   2  -2    1.30    1.60
  -4   2  -2    3.70    1.40
  -4   2  -2    2.40    1.40
   4   2   2    1.50    1.40
   5  -2   2    6.10    2.00
   5  -2   2    4.90    1.60
  -5  -2  -2    9.40    2.40
  -5  -2  -2    8.20    2.40
  -5  -2  -2    5.70    2.10
   5  -2   2    4.10    1.50
   5   2   2    5.30    2.10
  -5   2  -2    6.30    2.20
   5   2   2    4.00    1.80
   5   2   2    5.20    1.70
  -5   2  -2    8.00    2.00
   5   2   2   -0.30    1.30
  -5   2  -2    3.80    1.80
  -6  -2  -2    0.40    1.90
   6  -2   2    2.30    1.80
  -6  -2  -2   -0.70    1.80
  -6  -2  -2   -0.10    1.40
   6  -2   2    1.90    1.50
   6  -2   2    2.40    1.50
   6   2   2    0.90    1.70
   6   2   2    1.40    1.50
  -6   2  -2    1.00    1.60
   6   2   2    0.00    1.30
   6   2   2    1.00    1.90
  -6   2  -2    0.90    1.40
  -6   2  -2    0.90    1.90
   7  -2   2   10.00    2.40
   7  -2   2    5.90    2.20
  -7  -2  -2   10.00    3.00
  -7  -2  -2    4.20    2.50
   7  -2   2    9.60    2.90
  -7  -2  -2    7.10    2.50
  -7   2  -2   11.80    2.80
   7   2   2    6.50    2.70
   7   2   2    6.80    2.30
   7   2   2    4.90    2.00
  -7   2  -2    7.90    2.40
  -7   2  -2    5.90    2.60
   8  -2   2   68.69    6.80
   8  -2   2   58.79    5.60
  -8  -2  -2   70.09    7.90
   8  -2   2   63.99    5.60
  -8  -2  -2   84.79    8.00
  -8  -2  -2   70.29    7.30
   8   2   2   64.09    7.30
   8   2   2   60.79    6.20
  -8   2  -2   60.79    6.60
  -8   2  -2   66.19    6.60
  -9  -2  -2   -1.60    2.70
  -9  -2  -2    4.30    3.60
   9  -2   2    4.00    2.50
   9  -2   2    5.50    2.70
   9  -2   2    4.10    3.40
  -9  -2  -2    2.60    2.40
  -9   2  -2    4.20    2.90
  -9   2  -2    6.40    3.00
   9   2   2    2.90    3.20
  10  -2   2   22.70    4.30
 -10  -2  -2   24.80    5.40
 -10  -2  -2   25.60    4.90
  10  -2   2   24.20    5.60
 -10  -2  -2   28.90    5.90
  10  -2   2   24.80    4.30
 -10   2  -2   13.50    4.60
 -10   2  -2   32.60    5.70
  10   2   2   16.90    4.60
  11  -2   2   33.30    5.30
  11  -2   2   35.10    6.40
 -11  -2  -2   41.20    6.80
  11  -2   2   37.90    5.40
 -11  -2  -2   40.50    7.10
 -11   2  -2   29.80    6.40
 -11   2  -2   31.80    5.80
  11   2   2   43.50    7.20
  12  -2   2   26.10    5.20
 -12  -2  -2   17.00    5.80
  12  -2   2   19.00    6.10
  12  -2   2   26.50    5.40
  12   2   2   21.50    6.60
 -12   2  -2   15.50    5.30
 -12   2  -2   17.60    5.50
  13  -2   2   10.20    4.40
 -13  -2  -2    3.90    4.60
  13  -2   2    1.00    5.00
 -13   2  -2    9.80    5.50
  13   2   2    7.20    4.50
 -13   2  -2   -0.70    4.40
  13  -3  -2   24.30    6.80
  13  -3  -2   34.50    6.10
 -13   3   2   29.10    6.60
  13   3  -2   14.10    5.90
  12  -3  -2   72.99    7.60
  12  -3  -2   79.19   10.00
  12  -3  -2   65.09    7.30
 -12   3   2   69.79    8.80
  12   3  -2   76.69   10.50
  11  -3  -2   20.00    4.40
  11  -3  -2   19.70    4.90
  11  -3  -2   24.30    4.60
 -11  -3   2   24.90    6.30
  11   3  -2   21.70    5.80
 -11   3   2   15.70    4.40
 -11   3   2   18.80    4.90
 -10  -3   2   50.09    6.20
  10  -3  -2   66.19    6.60
 -10  -3   2   58.09    7.80
  10  -3  -2   65.09    6.60
  10  -3  -2   60.69    7.70
 -10   3   2   70.19    8.10
 -10   3   2   60.39    7.60
  10   3  -2   64.09    8.70
  -9  -3   2   64.29    7.00
   9  -3  -2   65.19    6.10
   9  -3  -2   64.79    6.10
  -9  -3   2   63.39    7.30
   9  -3  -2   52.69    6.20
   9   3  -2   55.19    7.40
  -9   3   2   77.09    7.70
  -9   3   2   59.39    6.40
  -8  -3   2  139.69    8.70
   8  -3  -2  135.49    7.30
  -8  -3   2  137.79    8.00
   8  -3  -2  149.19    7.60
   8  -3  -2  155.18    8.50
  -8   3   2  159.98    8.10
  -8   3   2  140.09    8.30
   8   3  -2  134.79    8.70
   7  -3  -2   11.30    2.60
  -7  -3   2   22.30    3.50
   7  -3  -2   25.20    4.00
   7  -3  -2   19.00    2.90
  -7  -3   2   20.60    4.10
   7   3  -2   13.10    3.10
  -7   3   2   16.50    3.10
  -7   3   2   21.10    3.60
   7   3  -2   15.40    3.60
  -7   3   2   16.40    3.40
   7   3  -2   15.40    3.10
   6  -3  -2   19.50    2.90
   6  -3  -2   21.30    2.80
  -6  -3   2   18.90    3.70
  -6  -3   2   20.20    3.70
   6  -3  -2   24.20    3.60
  -6  -3   2   22.20    3.20
  -6   3   2   24.10    3.20
   6   3  -2   21.00    3.30
   6   3  -2   23.50    3.70
  -6   3   2   16.80    2.90
   6   3  -2   25.40    3.80
  -6   3   2   23.00    3.40
   5  -3  -2  564.14   18.50
   5  -3  -2  568.24   18.20
   5  -3  -2  567.84   18.10
  -5  -3   2  581.54   19.20
  -5  -3   2  589.14   19.50
  -5  -3   2  584.54   18.60
  -5   3   2  588.44   18.50
  -5   3   2  597.34   18.10
  -5   3   2  590.44   18.10
   5   3  -2  580.34   18.80
   5   3  -2  595.54   19.50
  -4  -3   2  301.77   11.10
   4  -3  -2  306.57   10.20
  -4  -3   2  307.77   11.20
  -4  -3   2  282.77   11.00
  -4  -3   2  305.07   10.70
   4  -3  -2  300.47   10.50
   4  -3  -2  299.77   10.10
   4   3  -2  311.27   11.20
  -4   3   2  324.67   10.20
  -4   3   2  298.77   10.30
  -4   3   2  309.07   10.10
   4   3  -2  288.07   10.80
  -4   3   2  301.17   10.40
   3  -3  -2   11.10    1.90
  -3  -3   2   17.00    2.60
  -3  -3   2   13.20    2.20
   3  -3  -2   14.80    1.80
   3  -3  -2   13.60    1.70
  -3  -3   2   14.70    2.30
  -3  -3   2   13.40    2.10
   3   3  -2   14.80    2.50
   3   3  -2   16.60    2.50
  -3   3   2   15.60    2.10
  -3   3   2   16.70    2.00
  -3   3   2   12.40    1.70
  -3   3   2   16.30    2.00
   2  -3  -2 1646.24   46.60
   2  -3  -2 1666.43   46.30
  -2  -3   2 1701.73   47.20
  -2  -3   2 1685.43   47.20
  -2  -3   2 1690.13   46.80
   2  -3  -2 1613.14   46.60
  -2   3   2 1729.03   45.70
  -2   3   2 1652.93   46.10
   2   3  -2 1670.03   46.10
   2   3  -2 1745.73   46.70
  -2   3   2 1702.73   45.50
  -1  -3   2 9399.56  246.68
   1  -3  -2 9596.04  256.27
  -1  -3   2 9241.88  259.07
   1  -3  -2 9384.26  258.37
   1  -3  -2 9207.88  256.27
  -1  -3   2 9450.25  258.37
  -1  -3   2 9502.75  254.97
   1  -3  -2 9511.95  259.57
   1   3  -2 9808.92  255.67
  -1   3   2 9370.86  252.57
   1   3  -2 9445.25  251.47
  -1   3   2 9999.00  259.97
  -1   3   2 9447.25  254.77
   0  -3   2   38.40    2.60
   0  -3  -2   38.40    2.40
   0  -3  -2   37.00    2.40
   0  -3   2   39.80    2.80
   0  -3  -2   39.00    2.50
   0  -3  -2   40.20    2.60
   0  -3   2   37.50    1.90
   0   3   2   41.10    2.60
   0   3   2   40.90    2.50
   0   3  -2   37.70    1.80
   0   3   2   36.80    2.40
   0   3  -2   40.20    1.80
   1  -3   2  153.28    5.90
  -1  -3  -2  155.28    6.10
   1  -3   2  165.28    6.20
  -1  -3  -2  157.78    6.00
  -1  -3  -2  158.38    6.10
  -1  -3  -2  163.78    5.60
   1   3   2  166.58    6.20
   1   3   2  157.28    6.10
   1   3   2  164.78    6.00
   2  -3   2   36.10    2.10
   2  -3   2   41.10    3.40
  -2  -3  -2   38.30    3.40
  -2  -3  -2   40.20    3.40
  -2  -3  -2   35.80    2.70
  -2  -3  -2   34.70    2.90
   2   3   2   50.99    4.10
  -2   3  -2   35.10    1.90
   2   3   2   43.20    3.60
  -2   3  -2   37.60    2.00
   2   3   2   31.00    3.10
   3  -3   2  153.58    5.60
  -3  -3  -2  145.89    6.40
   3  -3   2  148.19    6.50
  -3  -3  -2  153.28    6.30
  -3  -3  -2  141.89    6.60
  -3   3  -2  155.38    5.40
   3   3   2  140.99    6.60
   3   3   2  154.18    6.60
   3   3   2  154.28    6.70
  -3   3  -2  147.99    5.40
   4  -3   2    0.00    1.40
   4  -3   2    0.30    0.90
   4  -3   2    0.60    1.00
  -4  -3  -2    2.50    1.60
  -4  -3  -2    0.50    1.10
   4  -3   2    1.60    1.30
  -4  -3  -2   -2.10    1.30
   4   3   2    0.70    1.30
   4   3   2    4.40    1.90
  -4   3  -2    1.90    1.10
  -4   3  -2    1.80    1.20
   4   3   2   -0.60    1.60
  -4   3  -2    0.80    1.10
   4   3   2    1.70    1.50
   5  -3   2   73.09    4.50
   5  -3   2   68.59    3.70
   5  -3   2   63.49    3.60
  -5  -3  -2   64.39    4.90
  -5  -3  -2   68.79    4.60
  -5  -3  -2   62.99    4.90
  -5   3  -2   77.59    5.10
  -5   3  -2   58.09    3.90
   5   3   2   71.09    4.80
   5   3   2   72.19    5.20
  -5   3  -2   67.19    3.70
   5   3   2   67.09    4.70
  -5   3  -2   73.19    4.20
   5   3   2   67.39    4.90
  -6  -3  -2  271.47   11.60
  -6  -3  -2  279.67   11.20
  -6  -3  -2  273.57   11.60
   6  -3   2  271.47   10.80
   6  -3   2  269.77    9.80
   6  -3   2  269.67    9.80
  -6   3  -2  275.87   10.40
   6   3   2  270.27   11.60
   6   3   2  278.07   11.40
   6   3   2  273.67   11.60
  -6   3  -2  255.57    9.70
   6   3   2  268.67   11.10
  -6   3  -2  260.27   10.20
  -6   3  -2  266.77   11.40
  -7  -3  -2  267.07   11.40
   7  -3   2  238.08   10.80
   7  -3   2  259.37    9.90
   7  -3   2  250.77    9.90
  -7  -3  -2  260.17   11.70
  -7   3  -2  253.47   11.70
  -7   3  -2  253.87   10.50
   7   3   2  259.57   11.50
   7   3   2  269.77   12.00
   7   3   2  264.57   11.60
  -8  -3  -2    1.50    2.80
   8  -3   2    2.30    2.00
   8  -3   2   -0.30    2.30
  -8  -3  -2    2.80    2.50
  -8  -3  -2   -1.20    1.70
   8  -3   2    2.20    1.90
  -8   3  -2   -0.30    2.20
  -8   3  -2    1.60    2.20
   8   3   2    0.10    2.60
   9  -3   2   66.79    6.00
  -9  -3  -2   80.79    7.90
   9  -3   2   62.39    5.70
  -9  -3  -2   73.99    8.20
   9  -3   2   70.59    7.30
  -9  -3  -2   99.09    9.10
  -9   3  -2   52.19    6.90
   9   3   2   64.89    8.10
  -9   3  -2   88.79    7.90
  10  -3   2   81.99    7.10
  10  -3   2   83.59    8.80
 -10  -3  -2   63.39    8.10
 -10  -3  -2   89.19    9.00
 -10  -3  -2   73.99    7.70
  10  -3   2   74.79    6.80
  10   3   2   96.99   10.00
 -10   3  -2   88.79    8.80
 -10   3  -2   74.69    8.80
 -11  -3  -2   36.60    7.00
  11  -3   2   28.30    4.90
  11  -3   2   33.40    6.10
  11  -3   2   45.50    5.70
 -11   3  -2   40.60    6.80
 -11   3  -2   42.10    6.60
  11   3   2   21.10    5.40
 -12  -3  -2   16.20    5.50
  12  -3   2   11.80    5.10
  12  -3   2    0.90    3.20
  12  -3   2    4.90    3.20
 -12   3  -2    9.20    5.00
 -12   3  -2    9.90    5.10
  12   3   2    9.00    5.30
  13  -3   2   47.90    6.50
  13  -3   2   42.30    5.80
  13  -3   2   70.59   10.90
 -13   3  -2   50.49    8.60
  13   3   2   38.40    7.70
 -13   3  -2   38.50    8.10
  13  -4  -2    5.20    3.70
  13  -4  -2    5.20    4.90
  13  -4  -2   -1.00    3.60
  13   4  -2   10.90    5.80
 -13   4   2   -1.20    3.70
  12  -4  -2    3.50    3.50
 -12  -4   2   -2.70    4.10
  12  -4  -2   -0.20    3.20
  12  -4  -2    5.70    4.70
 -12   4   2   -0.10    3.70
 -12   4   2    7.10    4.50
  12   4  -2    3.60    3.90
  11  -4  -2    1.90    2.90
 -11  -4   2    2.20    4.20
  11  -4  -2    6.90    3.80
  11  -4  -2    8.60    3.50
 -11   4   2   -0.50    3.20
 -11   4   2    3.40    3.70
  11   4  -2    3.90    3.60
  10  -4  -2   20.20    3.90
  10  -4  -2   20.90    4.10
 -10  -4   2   21.90    5.20
  10  -4  -2   25.80    5.30
  10   4  -2   17.70    5.10
 -10   4   2   19.30    5.10
 -10   4   2   13.70    4.00
   9  -4  -2  105.49    9.10
  -9  -4   2  123.49    8.20
  -9  -4   2  106.39    9.60
   9  -4  -2  118.19    7.00
   9  -4  -2  115.39    6.80
   9   4  -2  114.69    8.60
  -9   4   2  104.99    7.40
  -9   4   2  101.69    7.80
  -8  -4   2   50.19    6.50
   8  -4  -2   66.59    6.50
   8  -4  -2   54.59    4.90
   8  -4  -2   49.40    4.90
  -8  -4   2   65.79    6.30
  -8   4   2   57.59    6.10
   8   4  -2   46.30    6.20
  -8   4   2   52.79    5.30
   8   4  -2   51.79    6.30
  -7  -4   2    2.60    2.50
   7  -4  -2    1.70    2.10
   7  -4  -2    0.90    1.50
  -7  -4   2    0.50    1.80
   7  -4  -2   -1.90    1.50
   7   4  -2    0.30    1.90
  -7   4   2    0.40    2.10
  -7   4   2    1.70    1.80
   7   4  -2    1.30    2.50
  -7   4   2    0.70    1.80
  -6  -4   2    9.70    2.60
  -6  -4   2   12.80    2.90
   6  -4  -2   14.40    2.30
  -6  -4   2   19.70    3.20
   6  -4  -2   16.10    2.50
  -6  -4   2   13.70    3.10
   6  -4  -2    9.90    2.70
  -6   4   2   16.70    2.60
   6   4  -2   13.30    2.90
  -6   4   2   11.30    2.30
  -6   4   2   12.90    2.70
   6   4  -2   17.70    3.70
  -6   4   2   13.00    2.60
   5  -4  -2    5.60    1.50
  -5  -4   2    2.30    2.10
   5  -4  -2    4.70    1.60
  -5  -4   2    8.10    2.20
   5  -4  -2    7.40    2.10
  -5  -4   2    8.80    2.60
  -5  -4   2    9.50    2.60
  -5   4   2    7.00    1.90
  -5   4   2    6.10    1.80
   5   4  -2    7.70    2.40
  -5   4   2    5.80    1.70
   5   4  -2    5.30    2.00
  -5   4   2    6.70    2.00
   4  -4  -2   12.10    1.70
   4  -4  -2   12.40    1.70
  -4  -4   2    9.40    2.10
  -4  -4   2   10.90    2.40
   4  -4  -2   16.70    2.40
  -4  -4   2   11.00    2.60
  -4  -4   2   16.30    2.80
  -4   4   2   14.70    2.30
  -4   4   2   15.00    2.00
   4   4  -2   12.20    2.60
   4   4  -2   14.20    2.70
  -4   4   2   14.30    2.10
  -4   4   2   15.00    2.10
   3  -4  -2    0.40    0.80
  -3  -4   2    4.40    1.80
  -3  -4   2    2.80    1.40
   3  -4  -2    1.30    0.90
   3  -4  -2    3.70    1.40
  -3  -4   2    1.60    1.70
   3   4  -2    2.90    1.50
   3   4  -2    1.50    1.50
  -3   4   2    1.10    1.00
  -3   4   2    0.60    1.00
  -3   4   2    1.80    1.10
  -3   4   2    3.80    1.30
  -2  -4   2   53.79    3.40
   2  -4  -2   52.09    2.50
  -2  -4   2   55.29    3.10
  -2  -4   2   49.30    3.20
  -2  -4   2   52.69    3.20
   2  -4  -2   54.89    3.00
   2  -4  -2   52.99    2.60
  -2  -4   2   57.89    3.30
  -2   4   2   54.69    2.60
  -2   4   2   53.69    2.80
   2   4  -2   55.29    3.30
   2   4  -2   59.39    3.40
  -2   4   2   53.19    2.80
  -1  -4   2  333.27   10.50
  -1  -4   2  351.86   10.80
  -1  -4   2  363.66   11.70
   1  -4  -2  347.87   10.80
  -1  -4   2  337.97   10.70
   1  -4  -2  344.67   10.60
  -1  -4   2  352.66   10.60
   1  -4  -2  355.56   11.40
   1  -4  -2  353.96   10.60
   1   4  -2  364.46   10.50
  -1   4   2  348.07   10.60
  -1   4   2  361.16   10.70
  -1   4   2  358.96   10.90
   1   4  -2  350.96   10.50
  -1   4   2  346.17   10.50
   1   4  -2  340.87   10.50
   0  -4  -2   21.40    2.10
   0  -4   2   20.80    2.40
   0  -4  -2   25.50    2.60
   0  -4  -2   17.40    1.90
   0  -4  -2   20.60    2.30
   0  -4   2   22.70    2.70
   0   4  -2   22.20    1.40
   0   4   2   21.50    2.20
   0   4   2   23.60    2.50
   0   4   2   21.20    2.10
  -1  -4  -2  369.76   11.20
   1  -4   2  363.26   12.20
  -1  -4  -2  354.76   11.80
  -1  -4  -2  382.56   11.90
   1  -4   2  352.16   11.50
  -1  -4  -2  367.56   11.80
   1   4   2  367.36   12.00
   1   4   2  372.16   11.80
   1   4   2  367.76   11.70
  -2  -4  -2  226.78    8.30
   2  -4   2  228.78    8.60
   2  -4   2  215.98    8.10
  -2  -4  -2  224.88    8.40
  -2  -4  -2  227.38    7.90
  -2  -4  -2  214.68    8.40
   2   4   2  219.78    8.50
   2   4   2  209.28    8.20
   2   4   2  218.48    8.20
  -3  -4  -2  445.96   15.00
  -3  -4  -2  454.05   15.30
  -3  -4  -2  453.85   15.30
  -3  -4  -2  460.75   14.80
  -3  -4  -2  433.06   15.30
   3  -4   2  452.75   13.70
  -3   4  -2  472.35   13.50
  -3   4  -2  482.05   13.50
   3   4   2  484.95   15.50
   3   4   2  472.45   15.10
   3   4   2  455.05   15.60
  -4  -4  -2   62.39    4.20
   4  -4   2   63.39    3.60
  -4  -4  -2   59.49    5.00
  -4  -4  -2   57.59    4.40
  -4  -4  -2   69.09    4.80
   4  -4   2   63.39    4.50
   4   4   2   58.59    4.50
   4   4   2   60.59    4.40
   4   4   2   68.29    4.70
  -4   4  -2   64.39    3.40
  -4   4  -2   61.29    3.40
   5  -4   2   30.80    3.40
  -5  -4  -2   38.00    5.00
  -5  -4  -2   31.20    3.80
  -5  -4  -2   29.80    4.00
  -5  -4  -2   31.20    4.30
  -5   4  -2   30.70    3.10
   5   4   2   35.50    4.40
  -5   4  -2   37.50    3.60
   5   4   2   39.50    4.60
   5   4   2   29.10    3.80
  -5   4  -2   33.50    4.20
   6  -4   2   46.30    4.80
  -6  -4  -2   42.90    5.20
  -6  -4  -2   47.50    5.20
  -6  -4  -2   43.80    5.20
  -6   4  -2   44.90    5.30
  -6   4  -2   47.10    4.60
   6   4   2   65.89    6.30
   6   4   2   48.70    5.50
  -6   4  -2   43.20    4.20
   6   4   2   43.70    5.10
  -7  -4  -2   25.70    4.30
   7  -4   2   21.50    2.80
   7  -4   2   36.80    4.50
  -7  -4  -2   26.90    4.70
  -7  -4  -2   33.00    5.00
   7  -4   2   28.60    3.10
   7   4   2   33.80    5.00
  -7   4  -2   29.40    3.90
  -7   4  -2   18.30    3.90
   7   4   2   29.30    4.60
  -8  -4  -2   50.69    6.60
  -8  -4  -2   43.90    5.90
   8  -4   2   55.19    6.30
   8  -4   2   52.89    4.40
  -8  -4  -2   43.00    5.70
   8  -4   2   47.70    4.20
   8   4   2   46.50    6.00
  -8   4  -2   48.50    5.60
  -8   4  -2   51.49    6.30
   9  -4   2    2.40    2.10
  -9  -4  -2    5.10    3.80
  -9  -4  -2    8.30    3.60
   9  -4   2    7.60    2.60
  -9  -4  -2    9.90    3.20
   9  -4   2    9.00    3.60
  -9   4  -2   10.20    3.70
  -9   4  -2    6.50    3.00
   9   4   2   13.30    4.70
  10  -4   2    3.30    2.50
  10  -4   2   -3.00    2.80
 -10  -4  -2    3.80    3.90
 -10  -4  -2    1.80    3.30
  10  -4   2    3.40    2.50
 -10   4  -2   -2.80    2.80
 -10   4  -2    4.10    3.00
  10   4   2    3.10    3.40
 -11  -4  -2    8.50    4.80
  11  -4   2    3.50    3.90
 -11  -4  -2    7.60    4.40
  11  -4   2   10.50    3.40
  11  -4   2    9.60    3.00
  11   4   2    2.70    3.80
 -11   4  -2    2.80    3.30
 -11   4  -2    8.40    4.30
  12  -4   2   16.80    4.10
  12  -4   2   11.30    3.50
  12  -4   2   20.80    6.40
 -12   4  -2    5.40    5.00
  12   4   2   18.00    6.20
 -12   4  -2   21.20    5.40
  13  -4   2    3.90    5.10
 -13   4  -2    6.80    5.50
 -13   4  -2    6.20    4.50
  13   4   2    9.60    5.50
  13  -5  -2   68.89    6.80
  13  -5  -2   60.79    9.30
 -13   5   2   94.49   10.80
  13   5  -2   80.09   11.50
  12  -5  -2   24.50    6.10
 -12  -5   2   15.70    6.10
  12  -5  -2   18.40    4.00
  12  -5  -2   21.40    4.20
  12   5  -2    8.80    4.90
 -12   5   2   15.20    4.80
 -12   5   2   27.90    6.40
  11  -5  -2    0.50    3.90
 -11  -5   2    5.50    4.70
  11  -5  -2    1.20    2.70
  11  -5  -2    0.20    2.70
  11   5  -2    9.30    5.20
 -11   5   2    4.10    4.20
 -11   5   2    7.20    4.20
  10  -5  -2    7.30    4.10
  10  -5  -2    8.40    3.00
 -10  -5   2    9.40    4.50
  10  -5  -2    9.40    3.10
  10   5  -2    9.90    4.40
 -10   5   2   14.80    4.60
 -10   5   2    7.10    3.70
   9  -5  -2   33.50    5.40
   9  -5  -2   27.40    3.70
   9  -5  -2   30.30    3.90
  -9  -5   2   29.70    5.80
  -9   5   2   33.10    5.30
   9   5  -2   28.20    5.30
  -9   5   2   36.00    5.50
   8  -5  -2    1.50    1.70
  -8  -5   2    2.10    2.90
   8  -5  -2   -1.00    2.30
   8  -5  -2    1.60    1.80
  -8   5   2    0.90    2.70
   8   5  -2   -0.90    2.60
  -8   5   2   -0.70    2.30
   8   5  -2    2.70    2.50
  -7  -5   2   25.60    4.00
   7  -5  -2   25.70    3.00
   7  -5  -2   21.10    2.80
   7  -5  -2   19.00    3.60
  -7  -5   2   20.10    4.20
  -7   5   2   23.80    3.70
  -7   5   2   26.80    3.80
   7   5  -2   34.90    5.10
   7   5  -2   25.20    4.60
  -6  -5   2    2.30    1.90
  -6  -5   2    1.40    2.10
   6  -5  -2    2.20    1.40
  -6  -5   2    8.20    2.80
  -6  -5   2    0.40    1.90
  -6  -5   2    3.00    2.20
  -6   5   2    3.00    2.00
  -6   5   2    1.80    1.60
   6   5  -2    1.90    2.00
   6   5  -2    0.30    1.90
  -6   5   2    2.80    1.80
  -6   5   2    1.90    1.80
  -5  -5   2   76.69    5.30
  -5  -5   2   68.99    5.20
  -5  -5   2   75.89    4.90
   5  -5  -2   67.09    4.50
  -5  -5   2   78.29    5.40
  -5  -5   2   72.39    6.10
  -5   5   2   73.79    4.40
   5   5  -2   74.59    5.20
  -5   5   2   83.19    4.50
  -5   5   2   72.89    4.20
   5   5  -2   74.09    5.30
  -5   5   2   74.69    3.80
   4  -5  -2  364.06   11.70
  -4  -5   2  329.47   12.50
  -4  -5   2  346.17   12.60
  -4  -5   2  342.57   12.60
  -4  -5   2  345.27   12.70
  -4   5   2  359.96   11.50
   4   5  -2  364.46   12.70
  -4   5   2  353.06   11.30
   4   5  -2  349.77   12.50
  -4   5   2  347.37   11.40
  -3  -5   2   -0.80    1.30
  -3  -5   2   -0.20    1.30
  -3  -5   2    0.40    1.70
   3  -5  -2   -0.50    1.10
   3   5  -2    2.10    1.40
  -3   5   2   -0.40    1.10
  -3   5   2    0.30    1.00
   3   5  -2    0.40    1.30
  -3   5   2    0.10    0.90
  -2  -5   2  769.32   22.90
  -2  -5   2  788.62   22.90
  -2  -5   2  766.72   23.00
  -2  -5   2  780.22   21.90
   2  -5  -2  766.22   22.30
   2  -5  -2  762.82   23.60
   2   5  -2  749.92   22.60
   2   5  -2  826.32   22.90
  -2   5   2  794.22   22.00
  -2   5   2  781.52   21.90
  -1  -5   2  192.88    7.70
  -1  -5   2  187.68    6.80
  -1  -5   2  183.78    6.50
   1  -5  -2  182.68    7.40
  -1   5   2  189.78    6.70
  -1   5   2  186.98    6.40
  -1   5   2  191.18    6.50
   1   5  -2  191.38    6.40
   1   5  -2  187.98    6.10
   1   5  -2  187.18    6.40
  -1   5   2  182.68    6.20
   0  -5  -2   30.20    2.30
   0  -5  -2   32.10    3.30
   0  -5   2   29.10    3.40
   0  -5  -2   25.40    2.60
   0  -5   2   27.30    2.80
   0  -5  -2   27.40    2.10
   0   5   2   27.00    2.60
   0   5   2   30.70    2.60
   0   5   2   35.70    3.00
   0   5   2   30.00    2.70
  -1  -5  -2   21.10    2.80
  -1  -5  -2   15.80    2.40
  -1  -5  -2   14.60    2.00
   1  -5   2   19.90    2.60
   1  -5   2   17.70    2.70
  -1  -5  -2   12.80    2.00
   1   5   2   15.40    2.20
   1   5   2   16.30    2.40
   1   5   2   11.60    2.10
   2  -5   2   96.59    5.20
   2  -5   2   85.79    4.80
  -2  -5  -2   92.89    4.80
  -2  -5  -2   90.39    4.90
  -2  -5  -2   85.79    4.80
   2   5   2   95.99    4.90
   2   5   2   95.19    5.10
   3  -5   2  133.29    6.80
  -3  -5  -2  158.68    7.20
  -3  -5  -2  161.78    7.10
  -3  -5  -2  148.29    7.00
  -3  -5  -2  165.68    6.90
  -3  -5  -2  159.58    6.70
   3   5   2  149.49    7.10
   3   5   2  152.48    7.00
   3   5   2  152.78    7.00
  -4  -5  -2   -0.30    1.70
  -4  -5  -2   -0.10    1.50
  -4  -5  -2    3.70    2.30
  -4  -5  -2    0.20    1.20
   4  -5   2    0.70    1.60
  -4  -5  -2    0.50    1.60
   4  -5   2    1.90    1.20
  -4   5  -2    1.40    1.10
  -4   5  -2   -1.00    0.90
   4   5   2    0.20    1.70
   4   5   2   -0.60    1.40
   4   5   2    0.10    1.70
  -5  -5  -2    3.90    2.00
  -5  -5  -2    8.70    2.70
  -5  -5  -2    7.00    2.40
   5  -5   2    5.00    1.70
  -5  -5  -2    6.50    2.10
   5  -5   2    3.60    2.40
  -5  -5  -2    6.10    2.40
   5   5   2    6.80    2.50
  -5   5  -2    6.20    1.60
  -5   5  -2    3.00    2.00
   5   5   2    3.80    2.10
  -5   5  -2    4.20    1.60
   6  -5   2   79.09    5.00
  -6  -5  -2   75.99    5.50
  -6  -5  -2   74.89    6.90
  -6  -5  -2   69.49    6.50
  -6  -5  -2   89.39    7.30
  -6   5  -2   80.49    4.70
   6   5   2   83.29    6.20
   6   5   2   85.69    6.00
  -6   5  -2   65.99    4.50
  -6   5  -2   74.89    6.70
  -7  -5  -2   76.29    7.40
   7  -5   2   80.49    5.60
  -7  -5  -2   73.19    7.40
  -7  -5  -2   66.19    6.50
   7   5   2   93.19    8.00
  -7   5  -2   80.99    7.50
  -7   5  -2   80.39    5.30
   7   5   2   82.69    7.70
   8  -5   2   -0.20    2.30
  -8  -5  -2    4.10    3.10
  -8  -5  -2   -1.10    2.30
  -8  -5  -2   -0.20    2.60
  -8   5  -2   -0.70    2.40
   8   5   2   -0.20    3.00
  -8   5  -2   -2.60    1.70
  -9  -5  -2   -1.70    2.80
   9  -5   2   -2.60    2.60
  -9  -5  -2    6.20    4.00
   9   5   2    1.90    3.60
  -9   5  -2    5.90    3.10
  -9   5  -2    0.40    2.70
 -10  -5  -2   46.50    7.60
  10  -5   2   48.30    6.90
 -10   5  -2   45.10    7.30
  10   5   2   36.00    6.50
 -10   5  -2   43.20    6.50
  11  -5   2   25.60    5.90
 -11  -5  -2   15.00    5.20
 -11   5  -2   15.40    4.50
  11   5   2   20.00    5.70
 -11   5  -2   19.40    5.70
  12  -5   2   -0.70    4.20
 -12   5  -2    0.20    4.60
 -12   5  -2   -0.90    3.40
  12   5   2    1.50    3.70
  13  -5   2    9.60    5.30
  13   5   2    8.40    5.80
 -13   5  -2    9.70    5.30
 -13   5  -2    3.20    5.00
 -13  -6   2   12.50    6.00
  13  -6  -2   15.80    5.80
  13   6  -2   13.70    6.40
 -13   6   2   19.90    6.40
  12  -6  -2    8.40    4.80
 -12  -6   2    3.10    5.00
 -12   6   2    7.00    4.80
 -12   6   2    7.60    4.50
  12   6  -2   11.20    5.50
 -11  -6   2   86.49   10.10
  11  -6  -2   95.99    9.60
  11   6  -2   72.69    8.80
 -11   6   2   81.49    9.00
 -11   6   2   77.69    8.10
 -10  -6   2  147.29   12.80
  10  -6  -2  137.69    9.30
  10   6  -2  137.69   12.40
 -10   6   2  140.39    9.70
 -10   6   2  133.69    8.70
  -9  -6   2   51.69    7.20
   9  -6  -2   68.89    7.20
  -9   6   2   58.39    6.20
  -9   6   2   70.19    7.30
   9   6  -2   50.59    6.70
  -8  -6   2   29.40    5.40
   8  -6  -2   47.90    5.70
  -8   6   2   35.30    4.60
  -8   6   2   37.90    5.20
   8   6  -2   32.60    5.60
   8   6  -2   28.00    5.10
   7  -6  -2   41.80    5.00
  -7  -6   2   37.00    5.30
  -7  -6   2   37.00    5.30
   7   6  -2   36.70    5.80
   7   6  -2   43.90    6.00
  -7   6   2   33.10    4.60
  -7   6   2   31.10    4.10
  -6  -6   2   90.19    6.30
   6  -6  -2   86.09    5.40
  -6  -6   2   83.69    5.70
  -6  -6   2   96.89    6.70
  -6  -6   2   84.49    6.10
  -6   6   2   92.69    5.50
  -6   6   2   78.59    4.90
   6   6  -2   90.39    6.30
  -6   6   2   78.69    4.90
   6   6  -2   90.59    6.20
  -5  -6   2   38.20    4.80
  -5  -6   2   33.80    4.30
  -5  -6   2   33.50    3.90
  -5  -6   2   35.50    4.00
   5  -6  -2   44.70    4.10
   5   6  -2   36.30    4.30
  -5   6   2   39.30    3.70
  -5   6   2   35.70    3.50
  -5   6   2   33.70    3.50
   5   6  -2   38.50    4.60
   4  -6  -2  355.86   11.50
  -4  -6   2  327.67   12.50
  -4  -6   2  334.47   12.50
  -4  -6   2  328.77   12.40
   4   6  -2  345.17   12.60
  -4   6   2  351.96   11.20
  -4   6   2  348.37   11.20
   4   6  -2  332.57   12.30
  -4   6   2  342.47   11.10
  -3  -6   2 2893.21   76.89
  -3  -6   2 2872.31   80.49
  -3  -6   2 2925.71   81.19
   3  -6  -2 2917.01   79.29
  -3  -6   2 2848.92   81.19
  -3   6   2 2946.61   78.79
   3   6  -2 2949.00   80.29
   3   6  -2 2829.82   79.29
  -3   6   2 2983.00   78.19
  -3   6   2 2876.01   77.99
  -2  -6   2   53.99    4.90
  -2  -6   2   55.79    3.50
  -2  -6   2   63.79    3.50
  -2  -6   2   64.19    3.90
   2  -6  -2   55.09    4.20
   2  -6  -2   59.69    3.30
  -2  -6   2   59.19    3.40
  -2   6   2   59.69    3.20
   2   6  -2   58.19    3.50
   2   6  -2   64.09    3.70
  -2   6   2   64.09    3.30
  -2   6   2   60.99    3.10
   2   6  -2   53.99    3.40
  -1  -6   2    3.90    2.00
   1  -6  -2    5.50    2.10
  -1  -6   2    6.70    1.80
  -1  -6   2    7.00    1.70
  -1   6   2    6.30    1.50
  -1   6   2    6.70    1.40
  -1   6   2    6.60    1.70
   1   6  -2    6.20    1.40
   1   6  -2    5.60    1.30
   0  -6  -2   16.40    1.90
   0  -6  -2   11.70    1.60
   0  -6  -2   15.10    2.20
   0  -6   2   15.20    2.30
   0  -6   2   12.00    2.60
   0  -6  -2   14.50    2.60
   0   6   2   14.90    2.20
   0   6   2   16.00    2.10
   0   6   2   16.40    2.00
   0   6   2   15.20    2.10
  -1  -6  -2  175.98    6.80
  -1  -6  -2  165.08    7.00
  -1  -6  -2  175.98    7.40
   1  -6   2  168.08    7.70
   1  -6   2  175.38    7.10
  -1  -6  -2  170.38    6.70
   1   6   2  174.08    6.90
   1   6   2  163.58    6.70
   1   6   2  176.98    7.20
  -2  -6  -2  191.98    7.60
   2  -6   2  189.18    8.30
   2  -6   2  188.58    7.80
  -2  -6  -2  181.28    7.60
  -2  -6  -2  174.48    7.70
   2   6   2  178.38    7.50
   2   6   2  180.88    7.60
   2   6   2  198.98    8.10
  -3  -6  -2   30.20    3.50
  -3  -6  -2   37.90    4.20
   3  -6   2   43.60    4.70
  -3  -6  -2   43.20    4.20
   3   6   2   31.00    4.00
   3   6   2   41.40    4.20
   3   6   2   47.10    4.50
  -4  -6  -2  208.88    9.20
  -4  -6  -2  203.58    9.30
   4  -6   2  196.88    7.10
   4  -6   2  207.38    9.10
  -4  -6  -2  208.68    8.70
  -4  -6  -2  200.58    9.00
   4   6   2  216.48    9.30
   4   6   2  195.98    9.00
   4   6   2  194.98    9.30
  -4   6  -2  206.28    6.90
  -4   6  -2  212.88    7.00
  -5  -6  -2  106.39    6.80
   5  -6   2  113.99    5.20
  -5  -6  -2  111.09    6.30
  -5  -6  -2  108.99    6.70
  -5  -6  -2  111.99    6.80
   5  -6   2  115.89    6.90
   5   6   2  105.59    6.70
  -5   6  -2  108.49    4.90
  -5   6  -2   98.29    4.80
   5   6   2  110.99    7.00
   5   6   2  103.49    6.50
  -6  -6  -2    8.60    2.70
  -6  -6  -2   10.40    3.20
   6  -6   2    9.30    2.50
  -6  -6  -2   12.10    3.30
  -6   6  -2    7.50    2.10
  -6   6  -2    3.60    2.40
  -6   6  -2   11.50    2.40
   6   6   2   12.90    3.50
   6   6   2   10.00    3.20
  -7  -6  -2   69.59    7.30
   7  -6   2   68.49    6.10
   7   6   2   78.29    8.00
  -7   6  -2   62.79    6.70
   7   6   2   69.09    6.80
  -7   6  -2   66.29    5.50
  -8  -6  -2  140.59    9.60
   8  -6   2  139.89    8.10
  -8   6  -2  162.58    9.60
  -8   6  -2  142.49    7.70
   8   6   2  140.89    9.50
  -9  -6  -2   66.09    8.60
   9  -6   2   73.09    7.60
   9   6   2   63.49    8.00
  -9   6  -2   60.69    7.70
  -9   6  -2   53.19    5.90
 -10  -6  -2   -2.70    3.40
  10  -6   2    4.50    3.30
  10   6   2    0.50    3.20
 -10   6  -2    1.80    2.90
 -10   6  -2    6.00    3.80
  11  -6   2   10.00    4.80
 -11  -6  -2    1.30    4.10
  11   6   2    5.60    4.20
 -11   6  -2    3.90    4.30
 -11   6  -2    3.80    3.30
 -12  -6  -2   28.80    7.30
  12  -6   2   24.10    6.40
 -12   6  -2   19.90    5.40
  12   6   2   16.10    5.60
 -12   6  -2   31.20    7.40
 -13  -7   2    7.90    5.10
  13  -7  -2    8.30    5.60
  13   7  -2   10.30    6.60
 -13   7   2    6.90    4.20
 -12  -7   2   30.30    7.90
  12  -7  -2   26.30    6.50
  12   7  -2   28.60    7.80
 -12   7   2   18.10    5.10
 -12   7   2   25.90    6.40
  11  -7  -2    9.80    4.70
 -11  -7   2   13.10    5.00
 -11   7   2    1.80    4.40
 -11   7   2    9.30    4.10
  11   7  -2    6.80    4.60
 -10  -7   2   -2.00    3.90
  10  -7  -2    3.30    3.40
  10   7  -2   -2.50    3.30
 -10   7   2   -3.40    2.70
 -10   7   2    4.00    3.80
   9  -7  -2   45.00    6.00
  -9  -7   2   41.70    6.60
   9   7  -2   40.30    6.30
  -9   7   2   42.10    5.60
  -9   7   2   44.70    6.00
  -8  -7   2   23.70    5.10
   8  -7  -2   18.50    4.00
  -8   7   2   18.90    3.50
  -8   7   2   26.00    4.50
   8   7  -2   26.50    5.10
   8   7  -2   29.50    5.50
   7  -7  -2  528.25   18.50
  -7  -7   2  555.04   20.50
  -7  -7   2  535.55   20.40
  -7   7   2  522.75   17.90
   7   7  -2  552.24   20.10
   7   7  -2  564.34   20.40
  -7   7   2  564.74   18.90
   6  -7  -2   65.89    4.70
  -6  -7   2   69.29    6.80
  -6  -7   2   63.59    6.30
  -6  -7   2   72.79    6.90
   6   7  -2   64.39    6.10
  -6   7   2   67.19    4.40
   6   7  -2   68.09    6.90
  -6   7   2   63.29    4.50
  -6   7   2   59.89    4.30
  -5  -7   2   68.09    5.20
  -5  -7   2   69.09    5.30
   5  -7  -2   63.79    4.30
  -5  -7   2   76.39    6.80
  -5   7   2   66.99    4.20
   5   7  -2   72.49    5.40
  -5   7   2   70.29    4.20
  -5   7   2   65.89    4.20
   5   7  -2   71.19    5.30
  -4  -7   2    9.20    2.40
  -4  -7   2    6.80    2.20
  -4  -7   2    5.20    2.40
  -4  -7   2   14.50    2.40
   4  -7  -2   14.10    2.20
   4   7  -2   12.20    2.70
  -4   7   2    9.50    1.90
  -4   7   2   11.80    2.00
  -4   7   2   11.50    2.00
   4   7  -2   10.60    2.60
  -3  -7   2   33.80    3.50
  -3  -7   2   43.00    3.80
  -3  -7   2   45.60    3.20
  -3  -7   2   39.90    4.40
   3  -7  -2   44.30    2.90
  -3   7   2   43.20    2.80
   3   7  -2   51.59    4.50
  -3   7   2   44.10    2.80
   3   7  -2   49.80    3.70
  -2  -7   2   21.00    2.80
   2  -7  -2   22.30    2.40
  -2  -7   2   19.30    3.30
  -2  -7   2   23.10    2.80
   2  -7  -2   18.10    3.40
  -2  -7   2   19.60    2.30
  -2  -7   2   20.30    2.30
   2   7  -2   23.80    2.60
  -2   7   2   23.60    2.40
   2   7  -2   20.80    2.60
  -2   7   2   21.10    2.20
  -2   7   2   19.10    2.30
   2   7  -2   21.50    2.70
   1  -7  -2    3.80    1.50
  -1  -7   2   -1.60    1.70
  -1  -7   2    0.70    1.50
   1  -7  -2    3.90    2.00
  -1  -7   2    4.30    1.50
   1   7  -2    2.70    1.20
  -1   7   2    2.70    1.30
  -1   7   2    4.20    1.60
   1   7  -2    2.00    1.20
  -1   7   2    0.10    1.00
   0  -7   2    1.70    1.50
   0  -7   2    1.60    1.80
   0  -7  -2    0.50    1.60
   0  -7   2   -0.10    1.00
   0  -7  -2    0.90    1.40
   0  -7  -2    1.60    1.10
   0   7   2    0.80    1.10
   0   7   2   -0.20    1.40
   0   7   2    0.80    1.20
   0   7   2   -0.70    1.10
   0   7  -2    0.60    0.80
  -1  -7  -2  180.48    7.00
  -1  -7  -2  169.38    7.80
   1  -7   2  164.68    7.20
  -1  -7  -2  170.68    6.70
   1  -7   2  181.28    8.20
  -1  -7  -2  163.18    7.20
   1   7   2  188.68    7.20
   1   7   2  170.78    7.10
   1   7   2  173.98    7.40
   1   7   2  178.88    6.90
  -2  -7  -2  273.27   10.30
   2  -7   2  256.57   10.20
  -2  -7  -2  254.47   10.00
  -2  -7  -2  266.27   10.60
   2  -7   2  253.17   10.80
  -2  -7  -2  290.37   10.10
   2   7   2  277.37   10.60
   2   7   2  261.87    9.90
   2   7   2  273.67   10.10
  -3  -7  -2  131.19    7.00
  -3  -7  -2  140.69    6.80
   3  -7   2  126.99    7.30
  -3  -7  -2  141.09    6.70
   3  -7   2  128.29    6.80
   3   7   2  131.39    6.70
   3   7   2  131.19    6.90
   3   7   2  122.49    6.60
   4  -7   2   -0.50    1.90
  -4  -7  -2    0.20    1.70
  -4  -7  -2    0.00    2.00
  -4  -7  -2   -0.50    1.80
  -4  -7  -2    1.60    1.70
   4   7   2   -0.70    1.70
   4   7   2   -0.30    1.70
   4   7   2   -0.10    1.80
  -5  -7  -2   23.10    3.90
  -5  -7  -2   21.20    3.30
   5  -7   2   25.20    4.60
   5  -7   2   20.40    2.60
  -5  -7  -2   18.80    3.70
  -5  -7  -2   17.30    3.80
  -5   7  -2   23.30    2.60
   5   7   2   25.20    4.00
  -5   7  -2   20.10    2.40
   5   7   2   20.00    3.70
   5   7   2   20.80    3.90
   6  -7   2    0.60    1.50
  -6  -7  -2   -0.70    2.40
  -6  -7  -2    2.60    2.70
   6   7   2    2.10    2.60
  -6   7  -2    0.70    1.50
   6   7   2    1.50    2.30
  -6   7  -2    1.50    2.30
  -6   7  -2    2.80    1.80
   7  -7   2   24.10    3.70
  -7  -7  -2   28.10    5.20
   7   7   2   28.20    4.70
   7   7   2   24.40    4.80
  -7   7  -2   25.20    4.60
  -7   7  -2   25.80    3.50
  -8  -7  -2   59.59    7.70
   8  -7   2   51.09    5.80
   8   7   2   55.49    7.80
  -8   7  -2   46.40    4.90
  -8   7  -2   42.00    6.10
  -9  -7  -2    3.00    4.00
   9  -7   2   -1.30    2.80
  -9   7  -2   -1.20    3.20
  -9   7  -2   -0.70    2.40
   9   7   2    0.40    3.00
 -10  -7  -2    1.00    4.00
  10  -7   2    3.30    3.50
 -10   7  -2   -1.10    2.60
  10   7   2    2.60    3.90
 -10   7  -2   -0.50    3.60
  11  -7   2    0.90    3.60
 -11  -7  -2    4.90    5.60
 -11   7  -2    1.00    3.10
  11   7   2   -5.80    2.80
 -11   7  -2   -0.10    4.20
  12  -7   2   -6.20    3.70
 -12  -7  -2   -6.00    4.00
  12   7   2    0.90    4.00
 -12   7  -2    6.70    4.70
 -12   7  -2    5.40    4.60
 -12  -8   2    5.30    4.40
  12  -8  -2   11.40    5.40
 -12   8   2   11.60    4.40
  12   8  -2   10.00    5.70
 -11  -8   2   25.20    7.10
  11  -8  -2   37.70    6.60
 -11   8   2   42.10    6.30
  11   8  -2   31.00    7.00
  10  -8  -2   38.40    6.30
 -10  -8   2   30.60    6.30
  10   8  -2   37.10    6.70
 -10   8   2   38.70    6.20
 -10   8   2   31.00    5.50
   9  -8  -2   17.90    4.50
  -9  -8   2    7.60    4.20
   9   8  -2   13.80    4.60
  -9   8   2   14.60    3.60
  -9   8   2   13.60    4.10
  -8  -8   2   10.60    4.10
   8  -8  -2    5.40    3.00
  -8   8   2   13.10    3.60
   8   8  -2   10.90    4.00
  -8   8   2   11.10    2.80
   8   8  -2   11.10    4.00
  -7  -8   2  159.38    9.80
  -7  -8   2  175.08    9.60
   7  -8  -2  152.78    7.90
   7   8  -2  168.48    9.60
   7   8  -2  160.08    9.50
  -7   8   2  175.28    8.40
  -7   8   2  151.08    7.60
   6  -8  -2   79.69    5.20
  -6  -8   2   74.29    6.90
  -6  -8   2   82.99    7.40
  -6  -8   2   83.59    7.30
  -6   8   2   76.69    5.20
  -6   8   2   82.89    5.20
  -6   8   2   79.59    4.90
   6   8  -2   85.59    7.80
   6   8  -2   81.69    7.30
   5  -8  -2    0.20    1.50
  -5  -8   2    0.30    1.60
  -5  -8   2   -1.80    1.70
  -5  -8   2   -1.10    2.00
  -5  -8   2   -0.40    2.40
   5   8  -2    0.80    2.10
  -5   8   2   -1.00    1.30
   5   8  -2    0.30    1.90
  -5   8   2   -1.50    1.20
  -5   8   2    0.30    1.40
  -4  -8   2   49.80    4.70
  -4  -8   2   47.30    4.40
  -4  -8   2   51.69    5.10
  -4  -8   2   49.00    4.00
   4  -8  -2   54.99    3.50
   4   8  -2   50.09    4.90
   4   8  -2   47.00    4.90
  -4   8   2   49.70    3.30
  -4   8   2   49.50    3.30
  -4   8   2   45.50    3.20
   3  -8  -2    5.40    2.70
  -3  -8   2    2.70    2.40
  -3  -8   2    5.00    1.80
  -3  -8   2    6.20    2.30
  -3  -8   2    4.30    1.80
   3  -8  -2    3.10    1.50
  -3  -8   2    2.60    1.60
  -3   8   2    4.30    1.60
  -3   8   2    4.20    1.50
  -3   8   2    5.20    1.60
   3   8  -2    8.80    2.40
   3   8  -2    5.80    1.90
  -3   8   2    4.90    1.50
   3   8  -2    9.10    2.40
  -2  -8   2   15.90    2.00
  -2  -8   2   19.90    3.70
  -2  -8   2   14.30    2.60
  -2  -8   2   17.30    2.50
   2  -8  -2   24.80    3.80
  -2   8   2   18.00    2.30
   2   8  -2   19.30    2.30
  -2   8   2   16.20    2.10
   2   8  -2   19.10    2.60
  -2   8   2   18.20    2.20
   2   8  -2   14.50    2.40
   1  -8  -2   57.39    3.80
  -1  -8   2   61.99    4.00
   1  -8  -2   69.89    6.20
  -1  -8   2   56.09    3.60
  -1  -8   2   51.49    5.50
  -1   8   2   57.49    3.50
  -1   8   2   59.79    3.80
  -1   8   2   63.79    3.60
   1   8  -2   57.79    3.40
   1   8  -2   58.89    3.50
   0  -8  -2  321.27   12.60
   0  -8  -2  339.27   11.60
   0  -8   2  332.07   11.50
   0  -8   2  347.07   13.20
   0   8   2  341.77   11.80
   0   8   2  339.07   11.30
   0   8   2  344.77   11.30
   0   8   2  326.47   10.50
   0   8  -2  334.47   10.20
  -1  -8  -2  141.59    6.10
   1  -8   2  146.79    6.80
  -1  -8  -2  136.59    5.90
  -1  -8  -2  139.89    6.60
   1  -8   2  143.79    7.70
  -1  -8  -2  135.49    7.30
   1   8   2  140.99    6.10
   1   8   2  162.58    6.70
   1   8   2  161.68    7.00
   1   8   2  132.59    6.40
  -2  -8  -2   29.90    3.90
  -2  -8  -2   30.00    3.20
   2  -8   2   34.40    4.00
   2  -8   2   42.80    5.20
  -2  -8  -2   39.40    3.80
  -2  -8  -2   35.40    4.30
   2   8   2   31.00    3.50
   2   8   2   37.80    4.30
   2   8   2   35.30    4.00
  -3  -8  -2    3.50    2.00
   3  -8   2    3.50    2.20
  -3  -8  -2    7.00    2.20
  -3  -8  -2    3.00    2.30
   3  -8   2    2.80    2.60
   3   8   2    5.20    2.20
   3   8   2    1.70    1.90
   3   8   2    6.90    2.20
  -4  -8  -2  218.58    9.70
   4  -8   2  210.68    9.90
  -4  -8  -2  206.08    9.60
  -4  -8  -2  199.98    9.80
   4   8   2  213.28    9.60
   4   8   2  233.18   10.40
   4   8   2  205.38    9.60
   5  -8   2  128.19    8.00
  -5  -8  -2  134.99    7.80
  -5  -8  -2  123.09    7.60
  -5  -8  -2  120.79    7.80
   5   8   2  132.09    7.80
  -5   8  -2  128.19    5.30
   5   8   2  132.49    8.10
   5   8   2  137.29    7.90
  -6  -8  -2   33.90    5.70
  -6  -8  -2   40.10    5.40
   6  -8   2   34.90    3.70
   6   8   2   42.20    6.00
  -6   8  -2   49.30    5.70
  -6   8  -2   34.50    3.50
  -6   8  -2   36.10    3.60
   7  -8   2   77.39    5.30
  -7  -8  -2   88.79    8.40
  -7   8  -2   73.99    5.00
   7   8   2   71.79    7.80
  -7   8  -2   71.69    7.40
   7   8   2   86.19    8.40
   8  -8   2  126.29    7.50
  -8  -8  -2  135.39    9.70
  -8   8  -2  128.39    9.00
   8   8   2  133.39    9.30
  -8   8  -2  121.69    7.00
  -9  -8  -2   28.70    6.00
   9  -8   2   31.30    5.20
  -9   8  -2   27.00    4.40
  -9   8  -2   20.10    5.30
   9   8   2   36.20    6.50
  10  -8   2    1.60    3.50
 -10  -8  -2   -0.40    3.70
  10   8   2   -2.70    3.50
 -10   8  -2   -0.80    2.80
 -10   8  -2    2.70    3.90
 -11  -8  -2    3.30    5.10
  11  -8   2   13.40    4.90
 -11   8  -2    7.00    4.00
  11   8   2    0.40    3.80
 -11   8  -2   12.40    5.50
  12  -8   2   -4.40    3.70
 -12  -8  -2    1.60    4.50
 -12   8  -2    3.20    5.10
 -12   8  -2   -0.40    2.90
  12   8   2    1.10    4.50
  12  -9  -2   23.70    6.50
  12   9  -2    8.90    5.70
 -12   9   2   12.90    4.90
 -11  -9   2   12.10    6.00
  11  -9  -2    3.80    4.20
  11   9  -2   -0.10    4.70
 -11   9   2    3.20    3.70
  10  -9  -2   23.20    5.40
 -10  -9   2   16.30    5.70
  10   9  -2   22.90    5.90
 -10   9   2   25.40    5.00
   9  -9  -2  220.08   11.00
  -9  -9   2  199.48   12.40
   9   9  -2  209.98   12.40
  -9   9   2  209.48   10.30
  -8  -9   2  108.39   10.20
   8  -9  -2  122.09    7.50
  -8   9   2  114.49    7.10
   8   9  -2  129.49    9.20
   8   9  -2  124.09    9.10
  -7  -9   2   -1.20    2.80
  -7  -9   2    3.90    3.40
   7  -9  -2    0.50    2.30
   7   9  -2    5.20    3.30
  -7   9   2   -1.10    1.90
  -7   9   2   -0.30    2.20
   7   9  -2   -3.10    2.30
  -6  -9   2  140.19    8.80
  -6  -9   2  154.88    6.90
   6  -9  -2  148.69    7.20
  -6  -9   2  149.88    8.70
  -6  -9   2  163.18    8.90
   6   9  -2  155.18    8.80
   6   9  -2  151.78    8.70
  -6   9   2  148.79    6.90
  -6   9   2  146.39    7.30
  -5  -9   2  109.29    6.80
  -5  -9   2  103.69    7.10
  -5  -9   2  101.79    5.30
  -5  -9   2  101.69    6.50
   5  -9  -2  108.89    5.50
   5   9  -2  106.59    6.70
  -5   9   2  111.69    5.40
  -5   9   2  110.29    5.50
   5   9  -2  111.19    7.10
  -5   9   2  102.29    5.10
  -4  -9   2   -0.60    1.90
  -4  -9   2    3.60    1.90
   4  -9  -2   -0.10    1.30
  -4  -9   2   -0.60    1.50
  -4  -9   2   -1.80    2.00
  -4   9   2   -0.10    1.20
  -4   9   2   -0.10    1.30
  -4   9   2   -1.00    1.30
   4   9  -2   -5.20    1.60
   4   9  -2    0.30    1.80
  -3  -9   2    2.60    2.20
  -3  -9   2   -0.70    1.50
  -3  -9   2   -2.20    2.00
   3  -9  -2    1.80    1.30
   3  -9  -2   -2.10    2.10
  -3  -9   2    0.80    1.70
  -3  -9   2    0.00    1.50
   3   9  -2    0.30    1.60
  -3   9   2    1.90    1.30
  -3   9   2    1.10    1.40
  -3   9   2    0.00    1.30
   3   9  -2    2.80    1.90
   3   9  -2   -0.20    1.50
   2  -9  -2    8.50    3.10
  -2  -9   2    6.70    2.20
  -2  -9   2    5.20    1.90
  -2  -9   2    4.90    2.80
   2   9  -2    5.00    1.50
  -2   9   2    4.30    1.90
  -2   9   2    5.10    1.60
   2   9  -2    4.60    1.80
   2   9  -2    3.30    1.80
  -2   9   2    7.50    1.80
  -1  -9   2  176.68    7.00
   1  -9  -2  168.08    8.60
  -1  -9   2  162.08    7.20
  -1  -9   2  175.38    8.90
   1  -9  -2  172.78    7.20
   1   9  -2  175.08    6.70
  -1   9   2  179.68    7.20
   1   9  -2  177.28    6.90
  -1   9   2  177.68    6.90
  -1   9   2  178.18    6.90
   0  -9   2  126.19    6.30
   0  -9   2  130.29    5.10
   0  -9  -2  129.99    6.20
   0  -9   2  117.89    7.30
   0  -9  -2  123.79    7.10
   0   9   2  135.79    5.90
   0   9   2  127.49    6.20
   0   9  -2  126.19    4.90
   0   9  -2  119.99    4.90
   0   9   2  120.99    5.80
  -1  -9  -2   41.10    3.20
   1  -9   2   38.60    5.20
  -1  -9  -2   41.90    3.20
  -1  -9  -2   44.50    4.30
  -1  -9  -2   32.80    4.60
   1  -9   2   38.00    4.30
   1   9   2   43.00    4.10
   1   9   2   50.09    4.80
   1   9   2   42.00    4.10
   1   9   2   34.30    3.30
  -2  -9  -2  384.46   13.20
  -2  -9  -2  385.66   13.40
  -2  -9  -2  372.46   14.60
  -2  -9  -2  374.76   13.80
   2  -9   2  382.76   13.90
   2  -9   2  378.56   15.00
   2   9   2  379.06   13.60
   2   9   2  393.16   13.30
   2   9   2  381.46   14.20
  -3  -9  -2  171.18    7.90
  -3  -9  -2  160.68    8.60
  -3  -9  -2  151.38    7.80
   3  -9   2  183.78    8.70
   3  -9   2  166.98    9.10
  -3  -9  -2  164.08    8.40
   3   9   2  165.18    8.20
   3   9   2  179.38    8.70
   3   9   2  163.28    7.80
   4  -9   2    2.80    2.70
  -4  -9  -2    3.00    2.20
  -4  -9  -2    0.60    2.50
  -4  -9  -2    0.70    1.90
   4   9   2   -0.30    2.20
   4   9   2   -0.70    2.00
   4   9   2    0.60    2.20
  -5  -9  -2   80.19    7.00
   5  -9   2   92.19    8.30
  -5  -9  -2   85.49    7.40
  -5  -9  -2   71.39    7.40
   5   9   2   88.99    7.70
   5   9   2   77.19    7.40
   5   9   2   82.89    7.40
  -6  -9  -2   72.69    7.40
   6  -9   2   72.69    4.50
  -6  -9  -2   79.19    8.20
   6   9   2   71.69    7.50
  -6   9  -2   77.59    4.40
  -6   9  -2   73.49    4.40
   6   9   2   91.79    8.30
  -7  -9  -2    6.80    3.80
   7  -9   2    1.70    2.20
  -7   9  -2    9.00    2.40
   7   9   2    2.70    3.20
   7   9   2    7.80    3.80
  -7   9  -2    4.80    3.10
  -8  -9  -2    6.80    4.20
   8  -9   2    5.00    2.70
  -8   9  -2    4.80    3.60
  -8   9  -2    7.30    2.60
   8   9   2    0.90    3.20
  -9  -9  -2    9.30    4.70
   9  -9   2   11.20    3.70
  -9   9  -2    7.80    4.60
   9   9   2   16.00    5.30
  -9   9  -2   10.00    3.30
 -10  -9  -2    9.80    5.40
  10  -9   2   19.70    4.70
 -10   9  -2   16.00    5.60
 -10   9  -2   11.20    3.80
  10   9   2   20.80    6.30
 -11  -9  -2    0.80    4.30
  11  -9   2    5.70    4.30
 -11   9  -2    8.10    5.30
  11   9   2    8.90    5.20
 -11   9  -2   -0.80    3.00
 -12  -9  -2    0.00    5.00
  12  -9   2    0.30    4.40
 -12   9  -2   -5.20    4.50
  12   9   2   -0.10    3.70
 -12   9  -2   -5.10    3.00
 -12 -10   2   -3.30    5.00
  12 -10  -2   -3.00    4.50
 -12  10   2   -1.60    3.80
 -11 -10   2   -6.00    3.70
  11 -10  -2    6.60    4.50
 -11  10   2   -0.40    3.50
  10 -10  -2   -3.20    3.30
 -10 -10   2   -1.60    4.20
 -10  10   2   -0.20    2.80
   9 -10  -2    6.60    3.70
  -9 -10   2   13.20    5.00
  -9  10   2   15.30    3.80
   9  10  -2   13.70    5.20
   8 -10  -2    0.40    2.90
  -8 -10   2   -3.50    3.00
   8  10  -2   -2.00    2.70
  -8  10   2    4.50    2.60
   8  10  -2   -0.60    3.50
  -7 -10   2    8.50    4.10
   7 -10  -2    4.30    2.70
  -7 -10   2    7.40    3.50
  -7  10   2    0.10    1.90
   7  10  -2   -2.10    2.70
   7  10  -2    1.20    3.00
  -6 -10   2   58.29    6.20
   6 -10  -2   58.79    5.20
  -6 -10   2   51.49    6.70
  -6 -10   2   64.99    6.40
   6  10  -2   46.40    6.10
  -6  10   2   57.19    4.20
   6  10  -2   55.89    6.40
   5 -10  -2   60.69    4.20
  -5 -10   2   54.69    6.20
  -5 -10   2   51.29    5.30
  -5 -10   2   61.39    4.80
  -5 -10   2   47.40    5.10
  -5  10   2   49.70    4.30
  -5  10   2   51.69    3.80
   5  10  -2   58.79    6.30
  -4 -10   2    0.90    1.80
   4 -10  -2    3.60    1.70
  -4 -10   2    1.70    2.10
  -4 -10   2    1.40    2.10
  -4 -10   2    5.40    3.10
  -4 -10   2    4.10    2.70
   4  10  -2    0.30    2.20
  -4  10   2    3.90    1.90
  -4  10   2    6.00    1.70
  -4  10   2    4.40    1.70
  -3 -10   2   24.50    4.50
  -3 -10   2   28.90    4.00
   3 -10  -2   27.60    3.00
  -3 -10   2   33.40    3.60
  -3 -10   2   20.20    2.80
  -3 -10   2   27.80    3.20
   3 -10  -2   36.40    5.40
  -3  10   2   27.40    2.80
  -3  10   2   25.60    2.90
   3  10  -2   29.10    4.00
  -3  10   2   35.40    3.50
   2 -10  -2    4.40    2.70
  -2 -10   2    8.90    2.50
  -2 -10   2    7.40    2.20
  -2 -10   2   10.00    3.70
  -2  10   2   10.30    2.00
   2  10  -2    2.60    1.90
  -2  10   2    8.40    2.00
   2  10  -2    8.70    2.30
  -2  10   2   10.50    2.40
  -1 -10   2   12.50    3.60
  -1 -10   2   10.20    2.40
  -1 -10   2   11.20    2.40
   1 -10  -2    9.70    3.40
   1 -10  -2    8.10    2.40
  -1  10   2    9.40    2.20
   1  10  -2   11.60    2.20
  -1  10   2   11.00    2.60
  -1  10   2   11.90    2.40
   1  10  -2   15.20    2.30
   0 -10  -2    9.60    3.40
   0 -10   2    9.90    2.60
   0 -10   2   10.70    3.50
   0 -10  -2   12.30    2.80
   0 -10   2   16.30    2.30
   0  10  -2   14.30    2.00
   0  10   2   19.00    2.70
   0  10   2   16.40    3.00
   0  10  -2   15.20    2.10
   0  10   2   13.50    2.50
  -1 -10  -2    4.10    2.60
  -1 -10  -2    6.90    2.30
   1 -10   2    2.30    2.60
   1 -10   2    0.00    1.90
   1  10   2    2.20    2.30
   1  10   2    2.60    2.10
   1  10   2   -0.10    1.60
   2 -10   2   -0.90    2.40
  -2 -10  -2    0.40    2.40
  -2 -10  -2   -1.60    1.50
   2 -10   2   -0.10    2.10
  -2 -10  -2   -1.00    1.90
  -2 -10  -2   -1.60    1.60
   2  10   2   -0.20    1.90
   2  10   2    0.40    1.70
   2  10   2    0.70    1.80
   3 -10   2    5.80    3.20
   3 -10   2    2.90    2.80
  -3 -10  -2    4.30    2.70
  -3 -10  -2    3.20    2.50
  -3 -10  -2    2.50    2.10
  -3 -10  -2    5.10    2.40
   3  10   2    2.90    2.20
   3  10   2    3.60    2.10
   3  10   2    8.20    2.90
  -4 -10  -2   12.60    3.10
  -4 -10  -2   12.50    3.30
   4 -10   2   13.80    4.10
  -4 -10  -2   11.40    3.70
  -4 -10  -2    6.60    2.90
   4  10   2   11.20    3.00
   4  10   2   10.90    3.30
   4  10   2   11.20    3.50
  -5 -10  -2   55.29    6.00
  -5 -10  -2   51.99    5.90
  -5 -10  -2   41.40    5.90
   5  10   2   48.50    5.90
   5  10   2   48.50    6.70
   5  10   2   56.19    6.30
  -6 -10  -2    7.40    3.40
  -6 -10  -2    6.80    3.50
   6  10   2    5.60    3.40
   6  10   2    9.30    3.50
   7 -10   2   98.69    5.70
  -7 -10  -2   99.69   10.00
  -7  10  -2   87.49    5.30
   7  10   2   92.69    8.80
  -7  10  -2  103.79    9.00
   7  10   2  113.99   10.20
  -8 -10  -2   -0.10    3.50
   8 -10   2   -0.50    2.40
   8  10   2    2.90    3.40
  -8  10  -2   -0.10    2.20
  -8  10  -2   10.30    4.20
   8  10   2    1.30    3.90
  -9 -10  -2   18.00    5.60
   9 -10   2   12.90    3.90
  -9  10  -2   21.10    3.80
   9  10   2   11.50    4.60
  -9  10  -2   17.90    5.50
  10 -10   2    3.90    3.60
 -10 -10  -2   -1.70    4.20
 -10  10  -2    1.50    2.50
  10  10   2    5.40    4.50
 -10  10  -2    1.20    4.20
 -11 -10  -2    0.30    4.60
  11 -10   2   -1.60    3.70
 -11  10  -2   -2.40    4.50
 -11  10  -2    5.90    3.40
  11  10   2    1.80    4.30
 -11 -11   2    2.40    4.40
  11 -11  -2    0.00    3.90
 -11  11   2    0.00    3.80
 -10 -11   2    6.10    4.60
  10 -11  -2    6.70    4.20
 -10  11   2    3.80    3.40
  -9 -11   2   35.80    7.00
   9 -11  -2   20.40    4.60
   9  11  -2   38.80    7.20
  -9  11   2   29.00    4.50
   8 -11  -2   21.70    4.30
  -8 -11   2   21.10    5.50
  -8  11   2   12.60    3.20
   8  11  -2   23.00    5.50
  -7 -11   2   -1.70    3.20
  -7 -11   2   -0.20    3.40
   7 -11  -2    0.90    2.40
  -7  11   2    3.20    2.10
   7  11  -2   -4.20    2.60
  -6 -11   2   61.09    6.20
  -6 -11   2   50.79    6.80
  -6 -11   2   46.60    5.70
   6 -11  -2   55.69    5.10
   6  11  -2   60.09    7.10
  -6  11   2   46.20    4.40
  -5 -11   2    7.20    3.00
  -5 -11   2   10.90    4.40
  -5 -11   2   15.60    3.50
   5 -11  -2   13.30    2.60
  -5 -11   2   11.60    3.80
  -5  11   2    9.00    2.30
  -5  11   2    9.70    2.30
   5  11  -2    4.70    3.00
  -4 -11   2   16.20    4.30
  -4 -11   2   11.40    2.40
   4 -11  -2   12.30    2.40
  -4 -11   2   13.00    3.60
  -4 -11   2   10.20    2.80
  -4 -11   2   10.60    2.80
  -4  11   2   12.10    2.20
   4  11  -2    6.10    2.70
  -4  11   2   16.10    2.90
  -4  11   2   13.60    2.20
  -3 -11   2   18.00    2.80
   3 -11  -2   12.50    4.20
  -3 -11   2   16.20    4.30
  -3 -11   2   17.80    3.70
  -3  11   2   17.60    2.80
   3  11  -2   13.80    3.30
  -3  11   2   15.40    2.30
  -3  11   2   16.00    2.50
   2 -11  -2   -0.70    2.40
  -2 -11   2   -1.60    1.70
   2 -11  -2   -1.90    1.80
  -2 -11   2    0.70    2.70
  -2 -11   2   -2.40    1.70
  -2  11   2    0.00    1.60
   2  11  -2    0.90    1.90
  -2  11   2    0.00    1.80
  -2  11   2    0.80    1.60
   1 -11  -2   15.00    4.00
  -1 -11   2   12.80    2.80
  -1 -11   2   13.20    2.60
   1 -11  -2   15.00    2.80
  -1 -11   2   11.90    4.10
  -1  11   2   10.50    2.40
   1  11  -2   15.70    2.70
  -1  11   2   11.20    2.50
  -1  11   2   14.60    2.60
   1  11  -2   14.00    2.40
   0 -11   2   45.70    3.80
   0 -11  -2   41.50    4.70
   0 -11   2   49.30    6.50
   0 -11   2   45.70    4.80
   0 -11  -2   39.90    5.60
   0  11  -2   45.40    3.20
   0  11   2   48.80    4.90
   0  11   2   34.80    3.80
   0  11   2   46.70    4.40
   0  11  -2   47.00    3.30
  -1 -11  -2   52.49    5.20
   1 -11   2   51.59    6.80
   1 -11   2   55.89    5.60
  -1 -11  -2   54.29    6.50
   1  11   2   43.80    4.60
   1  11   2   53.59    5.40
   2 -11   2  206.38    9.60
  -2 -11  -2  182.78    9.10
  -2 -11  -2  197.28    8.20
   2 -11   2  190.28   10.50
  -2 -11  -2  197.58    8.00
  -2 -11  -2  182.78   10.20
   2  11   2  199.98    9.20
   2  11   2  201.68    9.70
  -3 -11  -2  161.08    9.40
  -3 -11  -2  169.78    8.30
  -3 -11  -2  170.48    8.00
   3 -11   2  167.88    9.90
  -3 -11  -2  158.68    8.80
   3 -11   2  176.68    9.20
   3  11   2  176.68    9.30
   3  11   2  144.99    8.40
  -4 -11  -2   47.20    6.20
  -4 -11  -2   45.70    5.20
   4 -11   2   44.20    6.00
  -4 -11  -2   43.80    5.10
  -4 -11  -2   54.59    6.30
   4  11   2   46.70    6.00
   4  11   2   61.29    6.90
  -5 -11  -2    2.00    3.10
  -5 -11  -2   -1.30    2.60
  -5 -11  -2    1.30    2.90
   5  11   2   -1.20    2.40
   5  11   2   -3.40    2.40
  -6 -11  -2   21.40    4.60
  -6 -11  -2   17.90    4.80
   6  11   2   15.20    4.40
  -7 -11  -2   11.30    4.20
   7 -11   2    5.60    2.40
  -7  11  -2   13.70    4.20
  -7  11  -2    7.90    2.40
   7  11   2    2.70    3.50
  -8 -11  -2    3.30    4.50
   8 -11   2   11.80    3.30
  -8  11  -2    8.10    2.70
  -8  11  -2    4.70    4.00
   8  11   2   11.60    4.50
  -9 -11  -2    5.40    4.90
   9 -11   2   10.60    3.60
  -9  11  -2    6.00    4.50
  -9  11  -2    6.20    2.70
  10 -11   2   28.40    5.20
 -10 -11  -2   31.10    7.60
 -10  11  -2   17.90    4.20
 -11 -11  -2   87.99   11.00
  11 -11   2   93.79    9.20
 -11  11  -2   77.59    8.00
  11 -12  -2   26.60    6.10
 -11 -12   2   27.50    7.40
 -11  12   2   21.40    5.00
 -10 -12   2   21.70    6.70
  10 -12  -2   28.20    5.70
 -10  12   2   14.80    4.00
  -9 -12   2   -4.30    4.00
   9 -12  -2    0.00    2.80
   9  12  -2    2.70    4.10
  -9  12   2    2.30    2.60
   8 -12  -2    0.30    2.60
  -8 -12   2    4.70    4.40
   8  12  -2    5.40    4.20
  -8  12   2    2.50    2.50
   7 -12  -2   95.49    6.20
  -7 -12   2   99.99    8.70
  -7 -12   2   80.59    8.60
  -7  12   2   91.59    5.80
   7  12  -2   87.49    9.20
  -6 -12   2   18.30    4.60
   6 -12  -2   19.30    3.30
  -6 -12   2   25.90    5.80
  -6 -12   2   17.60    4.20
  -6 -12   2   15.80    4.10
  -6  12   2   18.70    3.10
   6  12  -2   18.30    4.50
  -5 -12   2    2.70    2.70
   5 -12  -2    4.10    2.20
  -5 -12   2    4.90    3.80
  -5 -12   2   10.60    3.80
  -5 -12   2    7.00    3.10
   5  12  -2    5.70    3.00
  -5  12   2    2.60    2.00
  -5  12   2    6.60    2.50
  -4 -12   2   71.19    8.40
  -4 -12   2   70.09    5.20
  -4 -12   2   74.59    7.10
  -4 -12   2   70.99    5.10
  -4  12   2   66.69    4.30
   4  12  -2   72.19    6.70
  -4  12   2   76.59    4.80
  -4  12   2   67.99    4.30
   3 -12  -2   22.20    5.30
  -3 -12   2   36.00    6.20
  -3 -12   2   14.60    2.90
  -3 -12   2   23.50    4.10
  -3  12   2   19.30    2.80
  -3  12   2   25.20    3.10
   3  12  -2   20.20    3.70
  -3  12   2   28.40    3.60
  -2 -12   2   56.89    7.40
  -2 -12   2   65.29    4.80
   2 -12  -2   63.49    4.70
  -2 -12   2   57.39    5.50
   2 -12  -2   68.29    7.70
  -2  12   2   67.69    4.70
  -2  12   2   63.69    4.40
  -2  12   2   59.09    4.30
   2  12  -2   55.19    5.20
  -1 -12   2   -1.80    1.80
  -1 -12   2   -1.70    2.00
   1 -12  -2    1.70    2.30
  -1 -12   2   -2.40    2.70
   1 -12  -2    3.50    3.20
  -1  12   2   -2.30    1.80
  -1  12   2    1.80    1.90
  -1  12   2    1.20    2.00
   1  12  -2    1.80    1.90
   1  12  -2    1.50    2.10
   0 -12   2   55.59    7.10
   0 -12   2   60.89    4.20
   0 -12  -2   57.49    7.00
   0 -12  -2   68.29    5.90
   0 -12   2   77.19    6.30
   0  12   2   73.99    6.20
   0  12   2   55.89    5.20
   0  12  -2   65.29    4.10
   0  12  -2   65.09    4.10
  -1 -12  -2  179.58   10.40
   1 -12   2  191.38    9.10
   1 -12   2  191.28   10.90
  -1 -12  -2  178.28    8.90
   1  12   2  186.98    8.70
   1  12   2  183.28    9.10
   2 -12   2   14.20    3.80
  -2 -12  -2   13.20    3.70
  -2 -12  -2   14.50    2.70
  -2 -12  -2   11.00    4.10
   2 -12   2   18.10    4.70
   2  12   2   15.90    3.80
   2  12   2   16.10    3.60
  -3 -12  -2   15.10    3.90
   3 -12   2   23.40    4.60
  -3 -12  -2   22.10    3.40
  -3 -12  -2   20.40    4.70
  -3 -12  -2   16.10    3.40
   3 -12   2   27.00    5.60
   3  12   2   23.80    4.60
   3  12   2   15.70    3.70
  -4 -12  -2   94.09    8.50
  -4 -12  -2   99.79    6.70
  -4 -12  -2  102.09    7.00
   4 -12   2  103.79    9.10
  -4 -12  -2   82.09    8.70
   4  12   2   88.19    7.90
   4  12   2   82.79    8.50
  -5 -12  -2   10.60    3.40
  -5 -12  -2   10.70    3.70
  -5 -12  -2   12.70    4.30
  -5 -12  -2    9.00    3.80
   5  12   2   12.00    4.30
   5  12   2    1.70    3.40
  -6 -12  -2    8.00    3.60
  -6 -12  -2    2.20    3.40
   6  12   2    2.20    3.30
  -7 -12  -2   46.00    7.20
  -7  12  -2   60.09    7.00
   7  12   2   49.30    7.60
  -8 -12  -2   33.80    6.90
   8  12   2   51.89    8.30
  -8  12  -2   36.00    4.20
  -9 -12  -2    5.60    4.50
  -9  12  -2    8.70    3.00
 -10 -12  -2    0.30    4.80
 -10  12  -2    0.50    2.80
 -10 -13   2   -1.80    4.20
  10 -13  -2   10.90    4.50
 -10  13   2    3.40    3.60
   9 -13  -2    1.80    3.40
  -9 -13   2    2.90    4.50
  -9  13   2   -0.70    2.80
   9  13  -2   10.70    4.80
  -8 -13   2    7.30    4.30
   8 -13  -2    9.30    3.50
  -8 -13   2   12.20    5.00
   8  13  -2    5.50    4.00
  -8  13   2    8.20    3.10
  -7 -13   2    3.30    3.90
  -7 -13   2    1.70    3.60
  -7 -13   2    6.10    4.20
   7 -13  -2    3.30    2.50
  -7 -13   2   -3.50    3.10
  -7  13   2    2.10    2.20
   7  13  -2   -0.80    3.50
   6 -13  -2    2.10    2.50
  -6 -13   2   -0.10    2.90
  -6 -13   2   -0.30    3.00
  -6 -13   2    2.50    3.60
  -6 -13   2    0.50    3.80
   6  13  -2   -1.70    3.10
  -6  13   2    2.10    2.10
  -5 -13   2    3.00    3.70
  -5 -13   2    3.00    3.00
   5 -13  -2    4.80    2.40
  -5 -13   2    7.10    3.70
  -5 -13   2    8.10    3.00
   5  13  -2    4.80    3.00
  -5  13   2    6.30    2.30
  -5  13   2    3.80    2.50
  -4 -13   2    3.60    4.50
  -4 -13   2    9.30    3.60
  -4  13   2    9.20    2.80
   4  13  -2   13.50    3.80
  -4  13   2   10.00    2.40
   3 -13  -2   12.70    4.60
   3 -13  -2   14.30    3.00
  -3 -13   2    4.50    3.10
  -3 -13   2    8.20    4.30
   3  13  -2    8.30    3.10
  -3  13   2   10.30    2.80
  -3  13   2    6.90    2.30
  -2 -13   2   -0.60    2.30
  -2 -13   2    0.50    3.20
  -2 -13   2   -1.10    2.20
   2 -13  -2    3.10    3.70
   2 -13  -2    0.40    2.50
  -2  13   2   -0.30    2.00
   2  13  -2   -3.60    2.00
  -2  13   2   -2.00    2.20
   1 -13  -2   18.00    3.40
  -1 -13   2   11.30    2.80
   1 -13  -2   18.40    4.80
  -1 -13   2   24.80    4.10
  -1 -13   2   18.20    5.00
  -1  13   2   17.80    3.00
   1  13  -2   11.80    2.90
  -1  13   2   23.10    3.80
   0 -13   2   -1.10    3.20
   0 -13  -2    2.90    3.50
   0 -13   2    3.70    2.10
   0 -13  -2   10.00    3.00
   0 -13   2    0.80    2.60
   0  13  -2    2.70    1.80
   0  13   2    8.60    2.40
   0  13   2    2.70    2.70
   0  13  -2    4.10    2.10
   1 -13   2   -0.70    2.80
   1 -13   2    3.20    4.00
  -1 -13  -2    1.60    2.90
  -1 -13  -2   -2.50    2.40
   1  13   2   -1.60    2.00
   1  13   2    1.70    2.70
  -2 -13  -2    7.60    4.10
   2 -13   2    1.10    3.60
  -2 -13  -2   -2.10    2.60
   2 -13   2    0.10    2.60
   2  13   2   -2.20    2.40
   2  13   2    1.50    2.60
   3 -13   2   -1.10    3.10
  -3 -13  -2   -5.40    2.40
  -3 -13  -2   -0.40    2.40
  -3 -13  -2    2.00    2.90
  -3 -13  -2    0.50    2.20
   3 -13   2    0.00    3.70
   3  13   2   -1.70    2.50
   3  13   2   -0.30    2.70
   4 -13   2   58.89    7.40
  -4 -13  -2   43.00    6.80
  -4 -13  -2   59.49    5.90
  -4 -13  -2   49.10    6.50
  -4 -13  -2   46.70    5.20
   4  13   2   50.69    6.80
   4  13   2   50.29    6.20
  -5 -13  -2   29.50    5.40
  -5 -13  -2   39.30    5.40
  -5 -13  -2   34.30    5.20
  -5 -13  -2   28.20    5.80
   5  13   2   28.20    5.60
  -6 -13  -2   39.40    5.90
  -6 -13  -2   35.60    6.40
  -6 -13  -2   45.10    7.10
   6  13   2   42.30    7.10
  -7 -13  -2   -0.30    3.90
  -7 -13  -2    7.10    4.40
  -7 -13  -2    7.50    4.60
   7  13   2    2.60    3.80
  -8 -13  -2   -0.70    4.20
   8  13   2    3.50    4.00
  -9 -13  -2    9.70    5.40
  -9  13  -2    8.60    3.10
 -10 -13  -2    2.20    5.00
 -10  13  -2    1.10    2.80
 -10 -14   2   32.40    7.40
 -10  14   2   22.20    4.60
  -9 -14   2   -3.70    4.10
  -9  14   2    1.40    2.80
   9  14  -2    0.00    4.30
  -8 -14   2   38.50    6.60
  -8 -14   2   19.40    5.80
  -8 -14   2   28.10    6.90
   8  14  -2   24.80    5.80
  -8  14   2   24.60    3.80
  -7 -14   2    2.50    4.20
  -7 -14   2   14.30    4.40
  -7 -14   2    8.40    4.10
  -7 -14   2   12.90    5.00
   7  14  -2   10.70    4.60
  -7  14   2   11.60    2.90
  -6 -14   2   22.90    5.40
  -6 -14   2   22.60    4.40
  -6 -14   2   25.30    6.20
  -6 -14   2   30.50    4.80
   6  14  -2   30.50    5.70
  -6  14   2   19.20    3.10
  -5 -14   2   -0.80    3.30
  -5 -14   2    6.10    2.90
  -5 -14   2    5.40    3.00
  -5 -14   2   -3.70    3.50
   5  14  -2    3.20    3.30
  -4 -14   2   43.90    7.40
  -4 -14   2   35.80    5.40
   4  14  -2   40.80    5.40
  -4  14   2   41.90    4.10
  -3 -14   2   70.99    9.00
  -3 -14   2   73.19    7.10
   3 -14  -2   80.99    9.50
   3 -14  -2   87.29    5.70
   3  14  -2   73.39    6.80
  -3  14   2   83.29    5.20
  -3  14   2   85.09    5.60
   2 -14  -2   17.60    3.50
  -2 -14   2   17.10    3.70
  -2 -14   2   15.00    4.50
   2 -14  -2   13.30    4.80
  -2  14   2   13.60    3.30
  -2  14   2   12.00    2.70
   2  14  -2   15.00    3.30
   1 -14  -2    0.90    3.70
  -1 -14   2    5.60    3.90
   1 -14  -2    0.20    2.80
  -1 -14   2    6.50    3.00
  -1 -14   2    4.00    2.40
  -1  14   2    3.10    2.30
  -1  14   2    2.30    2.90
   1  14  -2    4.90    2.50
   0 -14  -2   37.90    4.70
   0 -14   2   34.60    4.80
   0 -14   2   40.90    4.20
   0 -14   2   59.69    8.10
   0 -14  -2   42.00    7.10
   0  14  -2   33.60    3.80
   0  14   2   29.30    4.10
   0  14   2   56.09    6.00
   1 -14   2   57.09    6.30
  -1 -14  -2   40.30    5.40
  -1 -14  -2   42.70    6.90
   1 -14   2   57.09    8.20
   1  14   2   45.40    5.10
   1  14   2   55.49    6.40
   2 -14   2   43.70    6.00
   2 -14   2   41.30    7.20
  -2 -14  -2   39.40    6.60
  -2 -14  -2   39.00    5.50
   2  14   2   28.60    4.80
   2  14   2   42.80    6.30
  -3 -14  -2   21.00    4.70
   3 -14   2   15.20    5.20
   3 -14   2   13.80    4.30
  -3 -14  -2   23.60    5.80
   3  14   2   13.90    3.90
   3  14   2   15.30    4.20
  -4 -14  -2   91.49    6.80
  -4 -14  -2   78.29    9.10
  -4 -14  -2   82.69    8.30
  -4 -14  -2   89.49    6.50
   4  14   2   93.79    9.20
   4  14   2   90.19    8.50
  -5 -14  -2   82.29    7.10
  -5 -14  -2   56.09    7.40
  -5 -14  -2   59.99    8.20
  -5 -14  -2   89.49    7.70
   5  14   2   65.59    7.70
  -6 -14  -2   -3.20    3.20
  -6 -14  -2    1.10    3.50
  -6 -14  -2   -0.60    3.30
  -6 -14  -2    3.00    3.70
   6  14   2    0.70    3.50
  -7 -14  -2   42.40    6.90
  -7 -14  -2   25.40    6.40
  -7 -14  -2   24.90    6.10
   7  14   2   25.30    6.40
  -8 -14  -2   19.80    6.10
  -8 -14  -2   35.90    7.50
   8  14   2   32.60    6.90
  -9 -14  -2   25.80    7.20
  -9 -15   2   -2.60    4.60
  -9 -15   2   10.00    5.50
  -9  15   2    0.40    2.80
   9  15  -2    1.10    4.30
  -8 -15   2   13.10    5.20
  -8 -15   2    2.80    4.60
  -8 -15   2    1.50    4.10
   8  15  -2    7.40    4.80
  -8  15   2    6.20    2.90
  -7 -15   2   16.70    6.00
  -7 -15   2    5.40    4.40
  -7 -15   2    9.70    3.80
  -7 -15   2   17.70    4.60
   7  15  -2    2.20    4.10
  -6 -15   2    3.60    4.20
  -6 -15   2    2.00    3.70
  -6 -15   2    6.60    3.70
  -6 -15   2   -3.50    2.80
  -6  15   2    1.90    2.30
   6  15  -2    1.20    3.60
  -5 -15   2   28.50    5.70
  -5 -15   2   34.20    7.00
   5  15  -2   30.30    5.40
  -4 -15   2   21.40    5.20
  -4 -15   2   22.30    6.60
   4  15  -2   25.30    5.00
  -4  15   2   22.80    3.40
   3 -15  -2    1.10    2.70
   3 -15  -2   -1.20    3.70
  -3 -15   2   -7.80    3.20
  -3 -15   2   -1.60    3.00
   3  15  -2   -1.10    2.50
  -3  15   2   -0.60    2.10
   2 -15  -2   71.19    9.10
  -2 -15   2   85.79    7.40
   2 -15  -2   86.89    6.20
  -2 -15   2   86.59    9.70
  -2  15   2   93.29    5.80
   2  15  -2   91.09    6.50
  -2  15   2   93.99    6.30
  -1 -15   2   40.10    4.80
   1 -15  -2   38.00    4.70
   1 -15  -2   34.40    6.80
  -1 -15   2   29.30    6.70
   1  15  -2   33.00    4.40
  -1  15   2   37.50    4.50
  -1  15   2   40.70    5.00
   0 -15   2   18.40    3.30
   0 -15   2   18.30    5.80
   0 -15  -2   19.50    5.70
   0 -15  -2   16.40    3.90
   0 -15   2   26.90    4.80
   0  15   2   25.00    4.70
   0  15   2   16.30    3.60
   0  15  -2   19.70    3.20
   1 -15   2   15.70    4.20
   1 -15   2    3.90    4.60
  -1 -15  -2   13.50    4.00
   1  15   2    7.80    3.30
   1  15   2    7.70    3.60
  -2 -15  -2   -0.20    3.20
   2 -15   2   -4.00    2.80
   2 -15   2    0.40    4.30
  -2 -15  -2   -0.10    3.80
   2  15   2    4.80    3.40
   2  15   2    1.10    2.60
  -3 -15  -2    8.20    4.80
   3 -15   2    8.70    4.40
  -3 -15  -2   11.80    4.30
   3 -15   2   23.50    6.10
   3  15   2    5.40    4.00
   3  15   2   12.70    4.00
  -4 -15  -2    4.00    4.40
  -4 -15  -2    4.30    3.10
  -4 -15  -2    8.80    4.20
  -4 -15  -2    8.80    3.00
   4  15   2   12.10    4.40
   4  15   2    9.60    4.40
  -5 -15  -2   25.00    5.10
  -5 -15  -2   25.60    5.70
  -5 -15  -2   24.10    6.00
  -5 -15  -2   24.50    4.50
   5  15   2   23.80    5.20
  -6 -15  -2   78.19    9.10
  -6 -15  -2  115.59    8.70
  -6 -15  -2   90.69    8.20
  -6 -15  -2   98.39   11.10
   6  15   2   87.99    9.90
  -7 -15  -2   49.60    7.20
  -7 -15  -2   28.80    6.80
  -7 -15  -2   51.29    8.60
   7  15   2   42.80    7.30
  -8 -15  -2   -1.30    4.60
  -8 -15  -2    0.10    4.60
   8  15   2    5.30    4.70
  -8 -16   2    4.10    4.90
  -8 -16   2    7.40    4.30
  -8 -16   2    0.50    4.70
  -8 -16   2   -1.20    4.20
  -8  16   2   -0.20    2.40
   8  16  -2   -4.60    4.40
  -7 -16   2    3.10    4.40
  -7 -16   2    4.20    4.00
  -7 -16   2    0.00    4.40
  -7 -16   2    6.80    3.70
   7  16  -2    8.40    4.60
  -6 -16   2   15.30    4.60
  -6 -16   2   -4.80    4.10
   6  16  -2   -2.40    3.40
  -5 -16   2    6.30    4.20
  -5 -16   2    0.10    4.20
   5  16  -2    6.70    3.90
  -4 -16   2   -0.10    4.10
  -4 -16   2   11.80    4.50
  -4  16   2    4.90    2.10
   4  16  -2    8.20    4.00
  -3 -16   2    2.20    3.50
  -3 -16   2    2.20    4.50
   3 -16  -2    5.30    4.90
  -3  16   2    2.50    2.30
   3  16  -2    0.20    2.90
   2 -16  -2   -2.00    4.10
  -2 -16   2    4.60    3.50
   2 -16  -2    5.10    3.20
  -2 -16   2    1.10    4.30
   2  16  -2    3.50    2.70
  -2  16   2    6.40    3.50
  -2  16   2    2.10    2.50
   1 -16  -2    1.90    2.70
  -1 -16   2   -1.60    3.90
   1 -16  -2   -4.70    3.80
  -1 -16   2    0.40    2.70
  -1  16   2   -2.70    3.00
   1  16  -2    0.30    2.50
  -1  16   2    3.50    2.70
   0 -16  -2    2.00    3.10
   0 -16  -2   13.40    5.10
   0 -16   2   -2.30    2.10
   0 -16   2    2.90    4.40
   0  16  -2    0.30    2.30
   0  16   2   -1.70    3.30
   0  16   2   -2.40    2.40
  -1 -16  -2    5.40    4.70
   1 -16   2    1.10    4.40
  -1 -16  -2    8.30    4.00
   1  16   2    8.60    4.20
   1  16   2    1.70    2.80
  -2 -16  -2    1.00    4.10
   2 -16   2    3.50    4.10
  -2 -16  -2   -0.30    3.40
   2 -16   2   11.00    5.40
   2  16   2    5.70    3.20
   2  16   2    3.10    3.80
  -3 -16  -2    7.70    5.00
  -3 -16  -2    4.70    4.30
   3 -16   2    4.30    4.70
   3  16   2    2.00    3.50
   3  16   2   -1.20    3.40
  -4 -16  -2    1.70    4.80
  -4 -16  -2   -0.70    3.50
   4  16   2   -1.70    3.00
  -5 -16  -2   -3.20    3.10
  -5 -16  -2    0.60    4.40
  -5 -16  -2    2.00    3.00
  -5 -16  -2    3.50    4.20
   5  16   2    2.80    3.70
  -6 -16  -2   -5.30    4.00
  -6 -16  -2    2.50    4.20
  -6 -16  -2    7.40    4.00
  -6 -16  -2    0.70    4.20
   6  16   2    1.00    4.60
  -7 -16  -2    2.10    4.50
  -7 -16  -2   -2.10    4.20
  -7 -16  -2   -1.20    4.20
   7  16   2    0.30    4.60
  -8 -16  -2   -3.60    4.50
  -8 -16  -2   -3.60    4.70
  -8 -16  -2   -3.20    4.20
   8  16   2    3.00    5.00
  -7 -17   2   -1.80    4.10
  -7 -17   2    1.30    5.20
   7  17  -2   -0.30    4.00
  -6 -17   2   15.20    6.00
  -6 -17   2   14.70    5.10
   6  17  -2   15.70    5.20
  -5 -17   2   18.70    5.50
  -5 -17   2   19.40    6.70
   5  17  -2   21.90    5.10
  -4 -17   2   22.10    5.40
  -4 -17   2   40.60    8.40
   4  17  -2   30.20    5.50
  -3 -17   2    0.50    3.30
   3 -17  -2   -0.20    4.80
  -3 -17   2    0.10    4.80
  -3  17   2    0.10    2.40
   3  17  -2    4.00    3.30
  -2 -17   2   18.60    6.30
   2 -17  -2   10.60    3.60
   2 -17  -2    6.70    5.30
  -2 -17   2    6.70    3.80
  -2  17   2   12.40    3.20
   2  17  -2    8.60    3.30
   1 -17  -2   18.20    4.20
  -1 -17   2   16.90    5.90
   1 -17  -2   29.50    6.80
  -1 -17   2   13.10    3.90
  -1  17   2   24.30    5.00
  -1  17   2   17.70    3.90
   1  17  -2   14.30    3.70
   0 -17  -2   24.30    4.60
   0 -17   2    8.90    5.20
   0 -17  -2   10.20    5.40
   0  17  -2   18.40    3.40
   0  17   2   19.60    5.10
   0  17   2   16.30    3.90
   1 -17   2    2.00    4.70
  -1 -17  -2   -3.70    3.20
  -1 -17  -2    5.40    5.20
   1  17   2   -0.20    2.60
   1  17   2    0.70    3.90
  -2 -17  -2   45.50    8.50
   2 -17   2   34.90    7.30
  -2 -17  -2   33.00    5.90
   2  17   2   34.60    5.50
   2  17   2   33.00    6.50
   3 -17   2   59.29    9.30
  -3 -17  -2   44.80    8.30
  -3 -17  -2   44.40    7.00
   3  17   2   60.89    8.20
   3  17   2   49.00    6.70
  -4 -17  -2    2.30    4.80
  -4 -17  -2    8.60    4.70
   4  17   2    4.40    4.00
  -5 -17  -2   13.00    5.20
  -5 -17  -2   18.10    6.50
   5  17   2   14.20    4.90
  -6 -17  -2   34.20    7.90
  -6 -17  -2   16.70    4.50
  -6 -17  -2   19.10    5.90
  -6 -17  -2   19.00    4.70
   6  17   2   10.10    5.10
  -7 -17  -2   37.30    7.40
  -7 -17  -2   47.00    8.60
  -7 -17  -2   37.40    6.00
   7  17   2   34.60    7.90
  -6 -18   2    8.60    4.90
  -6 -18   2    7.70    6.20
   6  18  -2   13.80    5.30
  -5 -18   2   -0.40    4.70
  -5 -18   2    0.40    4.00
   5  18  -2    3.70    4.10
  -4 -18   2   26.60    7.50
  -4 -18   2    7.10    4.20
   4  18  -2    8.20    4.00
  -3 -18   2   42.60    6.50
   3 -18  -2   35.30    7.60
  -3 -18   2   45.40    8.60
  -3  18   2   32.90    4.30
   3  18  -2   28.50    5.10
  -2 -18   2   -0.30    3.40
  -2 -18   2   -0.70    4.80
   2 -18  -2   -5.80    4.40
   2  18  -2   -0.40    2.90
  -2  18   2   -0.70    2.30
   1 -18  -2    3.20    5.50
  -1 -18   2    0.60    3.10
  -1 -18   2    9.10    5.90
   1 -18  -2   -2.50    2.80
  -1  18   2    0.70    2.90
   1  18  -2    1.00    2.80
   0 -18  -2   38.80    7.90
   0 -18  -2   39.40    6.00
   0 -18   2   34.60    7.40
   0  18   2   52.29    6.90
   0  18   2   37.30    5.40
  -1 -18  -2   28.00    5.40
   1 -18   2    7.30    5.50
  -1 -18  -2    2.50    4.90
   1  18   2    8.30    3.50
   1  18   2    3.20    4.20
  -2 -18  -2    2.90    5.10
  -2 -18  -2   -2.70    3.80
   2 -18   2    5.10    5.50
   2  18   2   16.60    5.60
   2  18   2    6.00    4.00
   3 -18   2   40.20    8.80
  -3 -18  -2   35.80    6.50
  -3 -18  -2   52.69    9.20
   3  18   2   33.90    5.90
  -4 -18  -2   36.60    7.90
  -4 -18  -2   30.80    6.40
   4  18   2   21.50    5.40
  -5 -18  -2    8.70    5.80
  -5 -18  -2    4.90    4.70
   5  18   2    7.70    4.60
  -6 -18  -2    1.60    5.40
  -6 -18  -2    0.80    4.60
  -4 -19   2   -5.20    3.70
  -4 -19   2    1.00    5.40
   4  19  -2    8.00    4.00
   3 -19  -2   -2.20    5.60
  -3 -19   2    1.30    4.00
  -3 -19   2    3.10    5.40
   3  19  -2   -3.40    2.80
  -3  19   2    1.40    2.70
  -2 -19   2    5.20    3.70
   2 -19  -2    3.90    5.40
  -2 -19   2    6.80    5.60
   2  19  -2    1.60    3.20
  -2  19   2    5.00    3.20
   1 -19  -2    4.70    5.60
  -1 -19   2    9.80    5.80
   1  19  -2    3.40    3.10
  -1  19   2    3.70    3.10
   0 -19   2   -0.10    4.70
   0 -19  -2    4.50    4.10
   0 -19  -2   16.70    6.70
   0  19   2    5.30    3.40
   0  19  -2   12.90    3.40
  -1 -19  -2   -3.10    3.70
  -1 -19  -2    1.10    4.80
   1 -19   2    0.10    4.70
   1  19   2   -0.50    3.00
   1  19   2    2.30    4.80
  -2 -19  -2   -2.50    5.00
  -2 -19  -2    1.30    4.30
   2 -19   2    9.90    6.00
   2  19   2   -0.70    3.20
   2  19   2    1.00    4.50
  -3 -19  -2    0.70    4.20
   3 -19   2   -9.70    4.30
  -3 -19  -2    9.70    6.20
   3  19   2    4.80    4.00
  -4 -19  -2   11.90    6.40
  -4 -19  -2    0.10    4.50
   4  19   2   -4.60    3.50
  -2 -20   2   14.40    6.80
   2 -20  -2   14.30    7.30
  -2 -20   2    6.50    4.40
  -2  20   2   10.00    3.70
   2  20  -2   13.20    4.20
   1 -20  -2    9.50    6.50
  -1 -20   2    6.60    6.70
  -1  20   2    4.30    3.30
   1  20  -2   16.10    4.10
   0 -20  -2   17.50    6.90
   0 -20   2   30.20    8.60
   0  20  -2   21.20    4.10
   0  20   2   28.50    5.10
   1 -20   2   19.00    7.60
  -1 -20  -2   26.00    5.90
  -1 -20  -2   32.60    7.90
   1  20   2   17.30    4.90
   1  20   2   39.50    7.30
  14   0  -3    8.40    5.50
  13   0  -3   -1.60    4.50
  12   0  -3   -5.10    3.40
 -12   0   3    0.30    3.50
 -11   0   3   -1.80    3.00
  11   0  -3    3.30    3.70
 -10   0   3    1.60    3.10
 -10   0   3   -1.00    3.00
  10   0  -3    0.00    2.40
  10   0  -3   -3.10    2.90
  -9   0   3   -0.70    2.10
  -9   0   3    0.50    2.80
   9   0  -3    3.20    3.00
   9   0  -3   -0.90    2.20
   8   0  -3    0.90    1.80
   8   0  -3    6.20    2.80
  -8   0   3   -1.10    2.20
   8   0  -3   -0.30    1.80
  -8   0   3    1.80    2.60
   7   0  -3   -0.40    1.50
  -7   0   3   -0.20    2.00
   7   0  -3   -1.60    1.80
  -7   0   3    0.10    1.70
   7   0  -3    0.60    1.60
   7   0  -3    2.90    2.30
   6   0  -3    2.10    1.60
   6   0  -3   -1.80    1.30
   6   0  -3    0.50    1.70
  -6   0   3    1.40    1.60
   6   0  -3    0.00    1.50
  -6   0   3   -2.00    1.70
   5   0  -3    0.30    1.20
   5   0  -3    1.80    1.50
   5   0  -3    1.10    1.50
  -5   0   3    2.20    1.70
   5   0  -3    1.10    1.80
  -5   0   3    0.70    1.60
  -4   0   3   -1.70    1.10
   4   0  -3    0.50    1.40
   4   0  -3    0.60    1.20
   4   0  -3   -0.30    1.30
   4   0  -3   -0.20    1.20
  -4   0   3   -0.30    1.50
   3   0  -3   -1.60    1.00
   3   0  -3   -0.50    1.20
   3   0  -3   -1.50    1.20
  -3   0   3    1.10    1.40
  -3   0   3    0.70    1.40
   2   0  -3   -0.40    1.10
  -2   0   3    0.10    1.20
  -2   0   3   -1.10    1.00
   2   0  -3   -0.30    1.10
  -1   0   3   -0.50    1.00
  -1   0   3   -0.30    1.00
   1   0  -3   -0.50    0.90
   1   0  -3   -0.20    1.00
  -1   0   3   -0.70    0.90
   0   0   3    0.60    1.00
   0   0   3   -0.40    0.90
   0   0   3   -0.60    0.70
   0   0   3   -1.40    0.90
   0   0  -3   -0.60    0.80
   0   0  -3    0.80    0.90
   1   0   3    0.10    0.90
   1   0   3   -0.20    1.00
   1   0   3   -0.10    0.90
   1   0   3    0.70    1.20
   1   0   3    1.40    1.20
  -1   0  -3   -1.10    0.90
  -1   0  -3   -0.50    0.90
   2   0   3    0.30    1.30
   2   0   3   -0.10    1.00
   2   0   3   -1.40    1.00
   2   0   3   -0.80    1.00
  -2   0  -3   -0.40    1.00
  -2   0  -3   -0.70    1.10
   2   0   3   -0.20    1.00
  -3   0  -3    0.00    1.10
   3   0   3    0.10    1.30
   3   0   3    0.80    1.10
   3   0   3   -0.40    1.10
  -3   0  -3   -2.00    1.10
   3   0   3   -0.40    1.00
  -3   0  -3   -0.80    1.00
   3   0   3   -0.50    1.10
   3   0   3   -0.20    1.00
   4   0   3   -1.40    1.20
  -4   0  -3    1.30    1.50
  -4   0  -3   -0.10    1.50
   4   0   3    1.50    1.40
  -4   0  -3   -2.10    1.00
   4   0   3   -1.20    1.10
   4   0   3   -1.40    1.00
  -5   0  -3    0.80    1.50
  -5   0  -3   -0.80    1.60
   5   0   3    1.60    1.50
   5   0   3    1.50    1.60
  -5   0  -3    2.90    1.80
   5   0   3    0.00    1.20
  -6   0  -3    1.80    1.80
   6   0   3   -3.20    1.40
   6   0   3   -1.30    1.20
  -6   0  -3    0.20    1.60
   6   0   3    0.00    1.40
  -6   0  -3   -0.90    1.80
  -7   0  -3    0.30    1.80
   7   0   3    0.20    1.50
   7   0   3   -1.20    1.50
   7   0   3   -0.80    1.80
  -7   0  -3   -0.70    1.80
  -7   0  -3    1.10    2.10
   8   0   3   -0.10    2.10
   8   0   3   -2.50    1.70
   8   0   3   -2.60    1.80
  -8   0  -3   -2.80    1.90
  -8   0  -3    3.70    2.70
  -8   0  -3    2.30    2.30
   9   0   3   -0.80    2.30
   9   0   3   -0.80    2.10
   9   0   3    1.90    2.60
  -9   0  -3   -2.10    2.50
  -9   0  -3    2.70    2.80
 -10   0  -3   -2.80    2.60
 -10   0  -3   -1.80    2.30
  10   0   3    1.40    3.20
  10   0   3    0.70    2.50
 -11   0  -3   -4.00    2.70
  11   0   3   -1.90    3.00
 -11   0  -3    0.30    3.50
  11   0   3   -3.00    2.80
 -12   0  -3   -4.20    3.00
  12   0   3   11.30    4.20
 -12   0  -3   -6.60    3.10
 -13   0  -3    7.20    5.10
 -13   0  -3   -2.50    4.00
  13   0   3    5.80    5.00
  14  -1  -3   13.00    6.50
  14   1  -3   21.50    7.40
  13  -1  -3   19.90    6.40
 -13   1   3   21.80    6.20
  13   1  -3   20.30    6.10
  12  -1  -3    0.00    4.00
  12   1  -3    7.10    4.50
 -12   1   3    1.00    3.70
 -11  -1   3   -0.10    3.00
  11  -1  -3    0.30    3.60
  11  -1  -3    0.10    3.20
  11   1  -3    0.00    3.30
 -11   1   3   -0.10    3.50
  10  -1  -3   51.49    6.40
  10  -1  -3   45.20    6.50
 -10  -1   3   46.40    6.70
 -10  -1   3   40.70    6.40
  10   1  -3   39.40    6.40
 -10   1   3   44.30    6.40
  -9  -1   3   29.30    4.90
  -9  -1   3   30.30    5.10
   9  -1  -3   16.60    3.70
   9  -1  -3   23.10    4.00
   9  -1  -3   20.90    4.90
  -9   1   3   22.30    4.10
  -9   1   3   32.50    5.20
   9   1  -3   25.90    5.30
   9   1  -3   22.70    4.30
   8  -1  -3   42.60    5.50
  -8  -1   3   36.10    5.00
  -8  -1   3   36.10    5.00
   8  -1  -3   36.50    4.60
   8  -1  -3   25.90    4.10
   8   1  -3   35.20    4.60
  -8   1   3   47.10    5.50
   8   1  -3   43.70    5.70
  -8   1   3   38.90    5.00
  -7  -1   3  234.48   10.50
  -7  -1   3  241.88   10.20
   7  -1  -3  228.88   10.50
   7  -1  -3  221.98   10.00
   7  -1  -3  209.28    9.80
   7   1  -3  232.88   10.70
  -7   1   3  236.28   10.00
   7   1  -3  244.18   10.50
   7   1  -3  223.38   10.30
  -7   1   3  235.08   10.10
   7   1  -3  212.28    9.90
   6  -1  -3  311.17   11.70
   6  -1  -3  294.67   11.50
   6  -1  -3  316.77   12.10
  -6  -1   3  287.47   11.40
  -6  -1   3  287.47   11.80
  -6   1   3  305.47   11.40
   6   1  -3  294.27   11.80
  -6   1   3  310.07   11.60
   6   1  -3  313.97   12.30
   6   1  -3  292.37   11.50
   5  -1  -3    0.20    1.50
  -5  -1   3    0.00    1.80
   5  -1  -3    0.00    1.40
  -5  -1   3    1.70    1.50
   5  -1  -3   -1.20    1.30
  -5   1   3    0.60    1.60
   5   1  -3   -1.90    1.30
  -5   1   3    0.20    1.30
   5   1  -3    2.40    1.40
   5   1  -3    0.30    1.60
   5   1  -3    1.20    1.60
  -4  -1   3   57.39    3.90
   4  -1  -3   63.69    4.10
   4  -1  -3   67.99    4.20
   4  -1  -3   67.09    4.10
  -4  -1   3   62.39    4.30
   4   1  -3   62.59    4.20
  -4   1   3   67.49    4.10
  -4   1   3   68.59    4.00
   4   1  -3   64.49    4.20
   4   1  -3   60.99    4.20
  -3  -1   3   33.10    3.10
   3  -1  -3   31.20    3.00
  -3  -1   3   30.70    3.40
   3  -1  -3   29.70    3.00
   3  -1  -3   29.30    2.80
   3   1  -3   23.60    3.00
   3   1  -3   34.00    3.40
  -3   1   3   31.10    3.10
  -3   1   3   40.00    3.30
   2  -1  -3  332.47   10.70
  -2  -1   3  328.07   10.40
   2  -1  -3  314.77   10.60
  -2  -1   3  320.47   10.70
   2  -1  -3  330.07   10.80
  -2   1   3  335.37   10.40
  -2   1   3  329.97   10.70
   2   1  -3  333.77   10.60
   2   1  -3  345.77   10.80
   1  -1  -3  199.58    6.80
   1  -1  -3  188.38    6.60
  -1  -1   3  188.58    6.70
   1  -1  -3  179.58    6.50
  -1  -1   3  192.38    6.70
  -1  -1   3  194.78    6.70
  -1  -1   3  197.58    6.70
  -1   1   3  192.78    6.80
  -1   1   3  186.48    6.70
   1   1  -3  197.48    6.60
   1   1  -3  190.68    6.60
  -1   1   3  196.18    6.60
   0  -1   3   14.60    1.80
   0  -1   3   12.50    1.90
   0  -1   3   16.00    1.80
   0  -1   3   17.30    2.00
   0  -1  -3   15.40    1.80
   0  -1  -3   13.50    1.80
   0  -1   3   14.20    1.60
   0   1   3   14.80    1.90
   0   1   3   15.60    2.00
   0   1   3   12.20    1.60
   0   1  -3   16.00    1.90
   0   1   3   15.90    1.70
   0   1  -3   13.70    1.90
   1  -1   3  312.17   10.50
  -1  -1  -3  346.37   10.60
   1  -1   3  336.57   10.40
   1  -1   3  346.57   10.50
   1  -1   3  332.27   10.40
   1  -1   3  344.77   10.40
  -1   1  -3  320.37   10.30
   1   1   3  337.27    9.90
   1   1   3  337.57   11.00
   1   1   3  342.67   10.90
   1   1   3  332.07   10.60
  -1   1  -3  344.87   10.30
  -2  -1  -3  156.38    6.00
   2  -1   3  146.49    5.70
   2  -1   3  158.98    5.70
  -2  -1  -3  149.79    6.10
   2  -1   3  149.99    5.90
   2  -1   3  149.19    5.60
  -2  -1  -3  149.69    6.10
   2  -1   3  156.38    5.90
   2   1   3  146.09    6.10
   2   1   3  149.39    6.10
   2   1   3  153.68    5.40
  -2   1  -3  154.98    5.70
   2   1   3  149.59    6.20
  -2   1  -3  148.99    5.60
   2   1   3  134.59    5.90
   2   1   3  140.89    5.90
  -3  -1  -3    4.20    1.40
   3  -1   3    6.00    1.80
   3  -1   3    4.10    1.40
  -3  -1  -3    6.50    1.90
   3  -1   3    7.90    2.00
  -3  -1  -3    5.10    1.80
   3  -1   3    6.10    1.60
   3  -1   3    6.70    1.70
   3   1   3    4.90    1.50
   3   1   3    5.60    1.60
  -3   1  -3    6.20    1.70
   3   1   3    7.20    1.60
   3   1   3    7.00    1.90
  -3   1  -3    7.30    1.80
   3   1   3    8.50    2.20
   3   1   3    5.30    1.70
   4  -1   3  623.14   19.10
   4  -1   3  592.44   19.30
   4  -1   3  593.34   19.00
  -4  -1  -3  608.04   19.70
  -4  -1  -3  592.24   19.00
   4  -1   3  603.94   18.80
  -4  -1  -3  618.74   19.50
   4   1   3  616.14   19.20
   4   1   3  610.84   19.70
  -4   1  -3  624.94   18.90
  -4   1  -3  616.14   19.80
   4   1   3  581.54   18.20
   4   1   3  629.24   19.90
   4   1   3  678.73   20.00
  -4   1  -3  601.44   18.70
   4   1   3  614.04   19.60
   5  -1   3  754.72   23.20
   5  -1   3  733.93   23.10
   5  -1   3  727.23   23.50
  -5  -1  -3  757.02   23.70
  -5  -1  -3  748.33   24.10
   5  -1   3  750.82   23.00
  -5  -1  -3  742.43   23.20
  -5   1  -3  761.62   23.00
  -5   1  -3  739.23   24.00
   5   1   3  711.43   23.60
   5   1   3  773.22   24.00
  -5   1  -3  747.73   22.90
   5   1   3  759.62   24.20
   5   1   3  751.82   24.00
   6  -1   3   62.49    4.50
   6  -1   3   67.29    4.60
   6  -1   3   70.89    6.20
  -6  -1  -3   72.89    5.50
  -6  -1  -3   73.09    6.40
  -6  -1  -3   71.29    5.30
  -6   1  -3   65.59    6.40
   6   1   3   64.29    4.90
   6   1   3   70.19    6.20
  -6   1  -3   63.99    4.60
  -6   1  -3   68.59    4.80
   6   1   3   64.09    4.90
   7  -1   3   18.90    3.20
  -7  -1  -3   28.90    4.50
  -7  -1  -3   32.40    5.10
  -7  -1  -3   19.40    3.70
   7  -1   3   27.20    4.50
   7  -1   3   18.10    3.20
   7   1   3   18.80    3.30
  -7   1  -3   30.50    4.10
   7   1   3   16.50    3.90
   7   1   3   20.70    3.60
  -7   1  -3   19.80    3.70
  -7   1  -3   17.70    3.40
  -8  -1  -3   19.50    4.40
  -8  -1  -3   23.90    4.10
   8  -1   3   24.50    4.10
  -8  -1  -3   29.90    5.10
   8  -1   3   29.00    4.10
   8  -1   3   27.70    4.50
  -8   1  -3   19.60    4.50
   8   1   3   30.60    4.70
   8   1   3   12.40    3.60
   8   1   3   27.70    5.10
  -8   1  -3   16.80    3.60
   9  -1   3  111.09    8.10
   9  -1   3  116.59    7.60
  -9  -1  -3   97.59    8.70
   9  -1   3  108.09    7.20
  -9  -1  -3   94.19    9.30
  -9  -1  -3  112.19    8.00
   9   1   3  114.49    8.40
   9   1   3  111.09    7.90
  -9   1  -3  109.59    7.70
  -9   1  -3  100.79    9.60
  10  -1   3   17.80    4.30
 -10  -1  -3   10.10    4.10
 -10  -1  -3   17.20    4.80
  10  -1   3   10.90    4.00
  10  -1   3   16.10    4.00
 -10   1  -3   13.40    4.60
 -10   1  -3   28.50    5.20
  10   1   3   11.10    4.30
  10   1   3   14.50    4.20
  11  -1   3   82.49    9.40
 -11  -1  -3   80.29    8.60
  11  -1   3   77.39    8.10
 -11  -1  -3   61.99    8.50
 -11   1  -3   73.09    8.60
  11   1   3   84.99   10.30
 -11   1  -3   65.09    9.10
  12  -1   3   40.10    7.20
  12  -1   3   57.09    7.50
 -12  -1  -3   48.70    8.30
 -12  -1  -3   31.00    7.00
 -12   1  -3   52.19    8.70
 -12   1  -3   29.80    6.90
  12   1   3   26.50    6.10
 -13  -1  -3   30.40    7.10
  13  -1   3   27.90    7.40
  13  -1   3   38.60    6.50
  13   1   3   28.20    7.90
 -13   1  -3   11.50    5.20
 -13   1  -3   28.70    7.00
  13  -2  -3   28.30    6.90
  13  -2  -3   35.10    6.10
 -13   2   3   35.40    6.60
  13   2  -3   38.70    7.80
  12  -2  -3   26.50    5.30
  12  -2  -3   29.80    6.90
  12   2  -3   18.70    5.70
 -12   2   3   25.00    5.50
  11  -2  -3   -2.10    2.90
  11  -2  -3   -0.30    3.10
 -11  -2   3   -1.60    3.60
 -11   2   3    1.40    3.10
  11   2  -3    2.40    3.50
 -10  -2   3   78.89    8.60
  10  -2  -3   81.59    7.60
  10  -2  -3   81.89    7.60
  10  -2  -3   89.29    8.90
 -10  -2   3   95.99    9.70
 -10   2   3   78.69    7.60
  10   2  -3   68.69    8.10
   9  -2  -3    2.10    2.40
   9  -2  -3    2.50    2.90
  -9  -2   3    1.70    2.60
   9  -2  -3    1.00    2.40
  -9  -2   3    8.40    4.00
  -9   2   3    2.80    2.80
   9   2  -3    5.20    3.60
   8  -2  -3  257.17   11.10
   8  -2  -3  248.08   11.70
  -8  -2   3  245.58   11.80
   8  -2  -3  232.68   10.80
  -8  -2   3  250.77   11.40
  -8   2   3  257.57   11.20
   8   2  -3  251.67   11.80
  -8   2   3  268.27   11.70
  -8   2   3  253.77   11.10
   8   2  -3  272.67   12.30
   7  -2  -3   83.59    7.40
  -7  -2   3   84.59    6.30
   7  -2  -3   78.29    5.40
   7  -2  -3   75.19    5.40
  -7  -2   3   77.89    6.50
   7   2  -3   95.59    8.10
   7   2  -3   79.49    7.20
  -7   2   3   76.89    5.50
  -7   2   3   68.89    6.30
   7   2  -3   74.59    5.60
  -7   2   3   75.79    5.40
  -6  -2   3   17.10    3.20
   6  -2  -3   19.60    3.50
   6  -2  -3   14.90    2.80
   6  -2  -3   14.50    2.70
  -6  -2   3   18.90    3.70
  -6   2   3   20.60    3.20
   6   2  -3   17.80    3.10
  -6   2   3   18.90    3.30
  -6   2   3   22.20    3.30
   6   2  -3   18.20    3.50
   6   2  -3   10.90    2.70
   6   2  -3   13.70    3.40
  -5  -2   3  159.58    7.70
  -5  -2   3  162.08    7.30
   5  -2  -3  173.08    7.30
   5  -2  -3  155.98    7.40
   5  -2  -3  156.28    7.10
  -5   2   3  173.48    7.30
   5   2  -3  156.48    7.60
  -5   2   3  180.18    7.30
   5   2  -3  169.38    7.90
   5   2  -3  175.68    7.60
   4  -2  -3   16.30    2.40
  -4  -2   3   10.40    2.30
  -4  -2   3   18.90    2.60
   4  -2  -3   21.40    2.80
   4  -2  -3   18.30    2.60
  -4  -2   3   20.20    2.80
  -4   2   3   22.70    2.80
  -4   2   3   16.80    2.40
   4   2  -3   21.80    3.10
   4   2  -3   21.50    3.10
  -3  -2   3    0.20    1.40
   3  -2  -3   -1.20    1.10
   3  -2  -3    0.00    1.20
  -3  -2   3   -0.80    1.50
   3  -2  -3    0.00    1.10
  -3  -2   3    2.80    1.40
  -3   2   3   -0.70    1.30
   3   2  -3    0.10    1.20
  -3   2   3   -0.70    1.10
   3   2  -3    2.60    1.40
   2  -2  -3   28.40    2.50
  -2  -2   3   35.70    3.10
   2  -2  -3   26.60    2.60
  -2  -2   3   32.40    3.20
   2  -2  -3   38.70    3.20
  -2  -2   3   27.60    2.60
   2   2  -3   30.80    2.90
  -2   2   3   36.20    3.00
   2   2  -3   25.00    2.40
  -2   2   3   36.80    2.90
  -1  -2   3    9.30    1.60
   1  -2  -3    4.20    1.20
   1  -2  -3    4.10    1.40
  -1  -2   3    5.70    1.30
  -1  -2   3    4.50    1.30
   1  -2  -3    5.90    1.40
  -1  -2   3    5.20    1.50
   1   2  -3    5.40    1.30
   1   2  -3    4.00    1.30
  -1   2   3    5.30    1.50
  -1   2   3    7.40    1.80
  -1   2   3    6.10    1.40
   0  -2  -3   46.90    3.00
   0  -2   3   46.40    2.30
   0  -2   3   42.80    2.80
   0  -2   3   43.80    2.40
   0  -2  -3   44.80    2.90
   0  -2   3   42.10    2.50
   0  -2   3   45.30    2.60
   0   2  -3   45.00    2.40
   0   2   3   47.60    3.00
   0   2   3   46.40    2.90
   0   2   3   49.10    3.00
   0   2  -3   46.10    2.40
   1  -2   3   -0.50    0.90
   1  -2   3    1.00    0.80
  -1  -2  -3    1.70    1.30
   1  -2   3    0.10    1.20
  -1  -2  -3    1.50    1.30
   1  -2   3   -0.20    0.70
  -1  -2  -3   -0.10    1.00
   1  -2   3    2.60    1.40
  -1   2  -3    1.20    0.90
  -1   2  -3    0.50    0.90
   1   2   3    0.70    1.20
   1   2   3    1.80    1.40
   1   2   3    2.10    1.30
   1   2   3    0.50    0.80
  -1   2  -3    0.90    0.90
   2  -2   3  622.14   19.10
  -2  -2  -3  663.43   19.50
   2  -2   3  652.93   19.10
   2  -2   3  647.94   18.90
  -2  -2  -3  659.23   19.90
   2  -2   3  625.14   18.80
  -2  -2  -3  673.13   19.40
  -2   2  -3  647.74   18.70
   2   2   3  646.24   19.50
  -2   2  -3  653.83   18.70
  -2   2  -3  669.53   18.70
   2   2   3  664.43   18.10
   2   2   3  634.54   20.10
   2   2   3  676.93   19.90
   3  -2   3  305.57   10.20
   3  -2   3  295.07    9.40
   3  -2   3  282.37    9.80
  -3  -2  -3  297.87   10.50
   3  -2   3  279.37    9.30
  -3  -2  -3  277.47   10.00
  -3  -2  -3  289.97   10.30
   3   2   3  284.77   10.60
   3   2   3  289.07   10.50
   3   2   3  263.37   10.30
  -3   2  -3  286.17    9.50
   3   2   3  282.37   10.20
  -3   2  -3  295.27    9.40
  -3   2  -3  280.97    9.50
   3   2   3  281.07    9.00
   4  -2   3  126.99    5.50
   4  -2   3  124.69    6.20
  -4  -2  -3  129.69    6.20
   4  -2   3  122.69    5.90
  -4  -2  -3  138.59    6.60
   4  -2   3  133.49    5.50
  -4  -2  -3  137.59    6.60
   4   2   3  131.69    6.30
   4   2   3  143.49    6.70
   4   2   3  118.99    6.40
  -4   2  -3  126.69    5.50
   4   2   3  130.49    6.50
   4   2   3  134.09    6.40
  -4   2  -3  131.09    5.70
  -4   2  -3  132.09    5.90
   4   2   3  137.59    6.70
   5  -2   3  108.49    5.30
   5  -2   3  113.59    6.10
   5  -2   3  101.29    5.20
  -5  -2  -3  118.19    6.10
  -5  -2  -3  112.09    6.40
  -5  -2  -3  114.79    6.30
   5  -2   3  106.09    5.90
  -5   2  -3  102.09    6.30
   5   2   3  109.59    6.40
   5   2   3  116.09    6.10
   5   2   3  124.99    6.50
   5   2   3  114.19    6.20
  -5   2  -3  107.39    5.50
  -5   2  -3  109.59    5.30
   6  -2   3  102.69    5.50
  -6  -2  -3   95.19    6.40
  -6  -2  -3  105.89    6.30
  -6  -2  -3   97.19    6.30
   6  -2   3   98.79    5.40
   6  -2   3   97.19    6.00
   6   2   3   94.29    6.10
   6   2   3   97.29    6.20
   6   2   3  104.99    6.20
  -6   2  -3  102.09    6.60
   6   2   3  100.89    6.50
  -6   2  -3   97.29    5.40
  -6   2  -3   98.69    5.70
  -7  -2  -3  187.78    9.20
   7  -2   3  191.68    8.40
   7  -2   3  183.88    8.40
   7  -2   3  186.88    9.30
  -7  -2  -3  193.68    9.60
  -7   2  -3  181.38    8.30
   7   2   3  185.28    9.80
   7   2   3  184.28    9.50
   7   2   3  177.68    9.20
  -7   2  -3  180.78    9.70
  -7   2  -3  173.88    8.60
  -8  -2  -3   39.20    5.90
   8  -2   3   25.30    3.90
  -8  -2  -3   25.80    4.50
   8  -2   3   30.20    4.10
   8  -2   3   28.90    5.00
  -8  -2  -3   28.70    5.10
  -8   2  -3   30.10    5.10
   8   2   3   27.90    4.60
  -8   2  -3   30.60    4.50
   8   2   3   36.10    5.60
   9  -2   3   37.30    4.90
  -9  -2  -3   59.39    7.50
   9  -2   3   37.10    5.60
  -9  -2  -3   33.20    5.90
  -9  -2  -3   44.50    6.40
   9  -2   3   43.30    5.10
  -9   2  -3   34.90    5.90
  -9   2  -3   34.90    5.30
   9   2   3   46.90    7.20
 -10  -2  -3   28.30    5.40
  10  -2   3   41.90    5.50
  10  -2   3   30.20    5.60
 -10  -2  -3   24.20    5.60
  10  -2   3   38.70    5.20
 -10   2  -3   24.10    5.20
 -10   2  -3   29.90    5.20
  10   2   3   31.10    5.90
  11  -2   3   57.89    6.70
 -11  -2  -3   47.90    7.70
  11  -2   3   73.29    7.40
 -11  -2  -3   76.29    9.60
  11  -2   3   64.09    8.70
  11   2   3   51.39    8.70
 -11   2  -3   44.10    7.20
 -11   2  -3   63.39    8.20
  12  -2   3    2.80    3.90
 -12  -2  -3   -1.10    3.70
  12  -2   3   -0.90    3.70
  12  -2   3   -0.20    3.00
  12   2   3   -3.30    3.50
 -12   2  -3    3.90    4.10
 -12   2  -3    2.00    4.00
  13  -2   3   12.40    4.60
 -13  -2  -3    5.70    4.90
  13  -2   3   14.30    6.10
  13  -2   3   13.20    5.10
 -13   2  -3    9.20    5.00
 -13   2  -3   21.70    6.50
  13   2   3   19.50    6.10
  13  -3  -3    7.30    4.80
  13  -3  -3    3.40    4.00
 -13   3   3    4.20    4.20
  13   3  -3    1.40    4.60
 -12  -3   3   25.10    6.80
  12  -3  -3   25.90    6.40
  12  -3  -3   11.30    4.30
  12   3  -3   12.60    5.80
 -12   3   3   20.80    5.40
  11  -3  -3    6.90    3.70
 -11  -3   3    3.90    4.40
  11  -3  -3    8.50    4.20
  11  -3  -3    9.90    3.90
  11   3  -3    1.60    3.80
 -11   3   3    8.60    4.10
  10  -3  -3   12.60    3.60
  10  -3  -3    8.50    3.80
  10  -3  -3   10.90    3.40
 -10  -3   3    9.60    4.40
  10   3  -3    5.70    4.00
 -10   3   3    8.90    3.50
   9  -3  -3   60.49    6.70
   9  -3  -3   75.99    6.70
  -9  -3   3   55.89    6.50
   9  -3  -3   57.49    5.60
  -9  -3   3   54.49    7.10
   9   3  -3   58.09    6.90
  -9   3   3   53.79    6.50
  -9   3   3   57.49    6.00
   8  -3  -3  129.39    7.10
   8  -3  -3  136.79    7.40
  -8  -3   3  139.89    8.10
  -8  -3   3  126.69    8.50
   8  -3  -3  117.69    7.70
  -8   3   3  128.19    7.50
  -8   3   3  132.29    7.90
   8   3  -3  120.49    8.30
  -8   3   3  136.19    7.50
   7  -3  -3   22.60    3.80
  -7  -3   3   20.00    3.50
  -7  -3   3   28.10    4.80
   7  -3  -3   21.70    3.50
   7  -3  -3   24.90    3.50
  -7   3   3   23.20    3.50
   7   3  -3   19.20    3.70
  -7   3   3   35.90    4.50
   7   3  -3   33.30    4.70
  -7   3   3   32.50    4.30
   7   3  -3   27.80    3.90
   6  -3  -3    0.30    1.70
  -6  -3   3    2.70    2.30
   6  -3  -3    2.70    1.60
  -6  -3   3    3.70    1.80
  -6  -3   3    0.10    1.80
   6  -3  -3   -1.00    1.70
  -6   3   3    3.50    1.90
   6   3  -3    2.90    2.20
  -6   3   3    2.10    1.90
   6   3  -3   -0.70    1.60
  -6   3   3    0.40    1.70
   6   3  -3    1.50    1.60
  -5  -3   3    8.60    2.00
   5  -3  -3    8.20    2.40
  -5  -3   3    8.40    2.30
  -5  -3   3    8.70    2.70
   5  -3  -3    6.10    1.80
   5  -3  -3    6.30    1.90
  -5   3   3    8.50    2.20
  -5   3   3    9.70    2.20
   5   3  -3    7.80    2.50
   5   3  -3   10.40    2.50
  -5   3   3    5.90    1.90
  -4  -3   3  404.06   13.30
  -4  -3   3  403.56   13.80
   4  -3  -3  378.86   13.20
  -4  -3   3  394.26   13.70
   4  -3  -3  397.16   13.00
   4  -3  -3  387.46   13.00
  -4  -3   3  413.36   13.90
   4   3  -3  383.86   13.40
  -4   3   3  409.46   12.80
  -4   3   3  409.96   12.90
  -4   3   3  386.26   12.80
   4   3  -3  378.56   13.60
  -3  -3   3  149.59    6.30
   3  -3  -3  147.39    6.10
  -3  -3   3  144.89    6.40
   3  -3  -3  155.18    5.90
  -3  -3   3  139.49    6.40
  -3  -3   3  147.59    6.40
   3  -3  -3  145.49    5.80
  -3   3   3  139.99    5.80
   3   3  -3  148.89    6.40
   3   3  -3  154.18    6.40
  -3   3   3  151.58    5.90
  -2  -3   3   52.09    3.20
   2  -3  -3   48.80    2.90
   2  -3  -3   49.80    2.90
   2  -3  -3   38.90    2.90
  -2  -3   3   50.19    3.20
  -2  -3   3   43.10    3.00
   2   3  -3   41.00    2.90
  -2   3   3   45.00    2.90
  -2   3   3   45.50    2.90
   2   3  -3   42.80    3.00
   1  -3  -3  229.38    7.80
   1  -3  -3  224.78    7.80
  -1  -3   3  229.58    7.50
   1  -3  -3  214.08    7.50
  -1  -3   3  229.58    7.50
  -1  -3   3  230.48    7.80
  -1  -3   3  226.48    7.70
  -1  -3   3  221.38    8.00
  -1   3   3  230.88    7.80
  -1   3   3  229.98    7.90
   1   3  -3  231.28    7.50
   1   3  -3  236.68    7.60
  -1   3   3  226.68    7.70
   0  -3  -3  570.04   17.30
   0  -3   3  561.04   16.80
   0  -3  -3  559.94   16.60
   0  -3   3  584.14   17.30
   0  -3  -3  574.64   17.40
   0  -3   3  570.94   16.50
   0  -3  -3  571.44   17.30
   0   3   3  589.14   17.00
   0   3  -3  562.54   16.20
   0   3  -3  583.94   16.20
   0   3   3  572.04   17.50
   0   3   3  580.84   17.20
   0   3  -3  578.64   16.20
  -1  -3  -3    2.00    1.30
   1  -3   3    2.70    1.40
  -1  -3  -3    0.40    1.30
  -1  -3  -3    1.60    1.10
   1  -3   3    3.00    1.50
  -1  -3  -3    3.20    1.40
  -1  -3  -3    2.90    1.30
   1  -3   3    1.70    0.90
   1   3   3    0.60    1.40
   1   3   3    2.20    1.50
  -1   3  -3    3.10    0.90
   1   3   3    1.10    1.30
  -1   3  -3    0.90    0.90
  -2  -3  -3   15.50    2.30
  -2  -3  -3   15.00    2.20
  -2  -3  -3   18.40    2.30
   2  -3   3   15.70    2.40
  -2  -3  -3   17.30    2.50
   2  -3   3   19.80    2.00
  -2   3  -3   17.70    1.80
   2   3   3   20.70    2.90
   2   3   3   23.20    2.90
  -2   3  -3   18.30    1.80
   2   3   3   13.20    2.30
  -3  -3  -3    9.60    2.00
   3  -3   3   10.00    1.90
  -3  -3  -3    4.10    2.10
  -3  -3  -3    7.60    1.90
   3  -3   3    9.60    2.30
   3   3   3    5.40    1.80
  -3   3  -3    8.80    1.50
   3   3   3    7.50    2.10
  -3   3  -3    6.90    1.50
  -3   3  -3    7.90    1.60
   3   3   3   10.10    2.40
   4  -3   3   90.29    4.80
  -4  -3  -3   85.69    5.50
   4  -3   3   98.19    5.40
   4  -3   3  102.19    4.10
  -4  -3  -3   93.29    5.20
   4  -3   3   88.99    4.00
  -4  -3  -3   89.29    5.40
   4   3   3   96.89    5.60
   4   3   3   97.99    5.50
   4   3   3   80.79    5.20
  -4   3  -3   92.19    4.60
  -4   3  -3   93.39    4.10
   4   3   3   91.59    5.60
  -4   3  -3   86.09    4.40
  -5  -3  -3    5.40    2.30
   5  -3   3    6.60    2.00
  -5  -3  -3    6.60    2.30
   5  -3   3    5.30    1.50
   5  -3   3    5.30    1.40
  -5  -3  -3    7.20    2.30
   5  -3   3    2.50    1.90
  -5   3  -3    6.30    1.90
   5   3   3    5.70    2.20
  -5   3  -3    3.80    1.70
  -5   3  -3    3.50    2.30
   5   3   3    3.20    2.10
   5   3   3    6.20    2.00
  -5   3  -3    5.10    1.70
   5   3   3    5.50    2.30
   5   3   3    7.60    2.20
  -6  -3  -3    0.40    1.90
   6  -3   3    1.40    1.70
  -6  -3  -3    0.40    1.60
   6  -3   3   -2.30    1.10
   6  -3   3    0.70    1.20
  -6  -3  -3    3.40    2.30
   6   3   3    0.40    1.60
   6   3   3   -1.60    1.90
  -6   3  -3   -3.00    1.60
  -6   3  -3    1.70    1.50
   6   3   3    1.00    1.70
   6   3   3    1.10    1.90
  -6   3  -3    0.10    1.70
  -7  -3  -3   -0.40    2.10
   7  -3   3    2.70    1.80
  -7  -3  -3    0.90    1.90
  -7  -3  -3    0.70    2.10
   7  -3   3    3.60    2.30
   7  -3   3    2.10    1.70
  -7   3  -3    2.30    2.10
   7   3   3   -0.10    2.00
   7   3   3    3.10    2.20
  -7   3  -3    4.30    2.50
  -8  -3  -3   21.80    4.10
   8  -3   3   27.80    3.70
   8  -3   3   34.50    4.00
  -8  -3  -3   30.00    5.50
   8  -3   3   25.10    4.60
  -8  -3  -3   21.50    4.70
  -8   3  -3   25.10    4.20
  -8   3  -3   25.40    4.80
   8   3   3   35.20    6.10
   9  -3   3    6.70    3.30
   9  -3   3    2.90    2.50
  -9  -3  -3    4.10    4.00
  -9  -3  -3    4.30    3.20
  -9  -3  -3    6.30    3.40
   9  -3   3    5.00    2.60
  -9   3  -3   -1.40    2.50
  -9   3  -3    4.50    2.80
   9   3   3    1.90    2.90
  10  -3   3   25.70    4.20
  10  -3   3   15.80    3.60
  10  -3   3   12.60    4.30
 -10  -3  -3   18.40    4.90
 -10  -3  -3   21.40    5.10
 -10  -3  -3   20.00    5.40
  10   3   3   16.80    5.90
 -10   3  -3   15.80    4.30
 -10   3  -3   26.10    5.90
 -11  -3  -3   14.40    4.90
  11  -3   3    7.40    4.90
  11  -3   3   14.50    3.70
  11  -3   3   10.80    4.00
  11   3   3    4.30    4.20
 -11   3  -3   12.00    4.30
  12  -3   3    5.00    4.70
  12  -3   3    4.70    3.70
  12  -3   3    7.40    3.20
 -12  -3  -3    0.30    4.10
  12   3   3    1.70    4.20
 -12   3  -3    6.50    4.20
 -12   3  -3    0.00    3.70
  13  -3   3    7.10    3.50
  13  -3   3    3.10    3.80
  13  -3   3   -0.80    4.40
 -13  -3  -3    1.80    4.90
  13   3   3   -0.20    4.40
 -13   3  -3    5.50    4.80
 -13   3  -3    2.80    3.90
  13  -4  -3   27.70    5.70
  13  -4  -3   20.60    5.10
  13  -4  -3   40.90    7.60
 -13   4   3   22.90    5.90
  13   4  -3   29.80    7.50
  12  -4  -3   86.09    7.90
  12  -4  -3   63.09    6.80
  12  -4  -3   80.49   10.00
 -12  -4   3   52.59    8.30
 -12   4   3   63.19    8.50
  12   4  -3   61.09    9.00
  11  -4  -3   20.50    4.30
 -11  -4   3   27.00    5.70
  11  -4  -3   28.20    5.00
  11  -4  -3   28.80    5.90
  11   4  -3   32.10    6.50
 -11   4   3   18.60    4.80
 -10  -4   3   -0.50    3.70
  10  -4  -3    1.20    2.70
  10  -4  -3   -3.30    2.30
  10  -4  -3   -3.50    2.70
 -10   4   3    2.00    3.40
  10   4  -3   -1.20    3.10
 -10   4   3    3.50    3.30
  -9  -4   3   17.50    4.60
   9  -4  -3   16.30    4.40
   9  -4  -3   21.30    3.80
   9  -4  -3   24.10    4.00
   9   4  -3   10.50    3.80
  -9   4   3   20.70    4.10
  -9   4   3   18.40    4.30
   8  -4  -3   12.10    2.80
  -8  -4   3   13.50    3.80
   8  -4  -3   15.50    3.60
   8  -4  -3   19.70    3.30
  -8  -4   3    9.10    3.80
   8   4  -3   15.40    3.80
  -8   4   3   18.70    3.80
  -8   4   3   20.70    4.00
   8   4  -3   15.40    4.80
   7  -4  -3  101.69    5.80
   7  -4  -3   97.39    5.70
  -7  -4   3   97.29    6.50
  -7  -4   3  124.59    7.60
   7  -4  -3   96.59    6.40
  -7   4   3  101.59    6.10
  -7   4   3  106.09    6.40
   7   4  -3   92.99    7.00
  -7   4   3   99.49    5.80
   7   4  -3  111.89    6.80
  -6  -4   3   30.00    3.90
  -6  -4   3   37.20    4.60
  -6  -4   3   38.60    4.70
  -6  -4   3   43.10    4.50
   6  -4  -3   43.40    3.90
   6  -4  -3   39.10    4.50
   6  -4  -3   35.40    3.60
  -6   4   3   47.80    4.30
   6   4  -3   40.70    5.00
  -6   4   3   37.70    3.90
   6   4  -3   33.20    4.70
  -6   4   3   40.00    4.20
  -5  -4   3  198.18    8.90
  -5  -4   3  195.88    8.40
   5  -4  -3  202.98    7.70
  -5  -4   3  212.48    9.10
   5  -4  -3  191.68    7.60
  -5  -4   3  210.78    9.20
   5  -4  -3  182.88    8.20
  -5   4   3  198.18    8.00
  -5   4   3  195.78    7.80
   5   4  -3  198.68    8.70
  -5   4   3  198.18    8.10
   5   4  -3  203.98    9.00
  -5   4   3  203.68    8.00
  -4  -4   3  267.57   10.00
  -4  -4   3  273.27   10.50
   4  -4  -3  267.97    9.50
  -4  -4   3  284.77   10.70
   4  -4  -3  263.17    9.40
  -4  -4   3  279.07   10.70
   4  -4  -3  287.27   10.00
   4   4  -3  295.87   10.70
  -4   4   3  274.37    9.40
  -4   4   3  268.67    9.60
  -4   4   3  284.17    9.80
   4   4  -3  281.27   10.50
  -4   4   3  273.27    9.50
  -3  -4   3   56.29    4.00
   3  -4  -3   59.09    3.40
   3  -4  -3   66.19    3.50
   3  -4  -3   62.99    3.70
  -3  -4   3   67.29    4.30
  -3  -4   3   69.99    4.10
  -3   4   3   65.89    3.60
   3   4  -3   64.89    4.10
  -3   4   3   61.19    3.50
   3   4  -3   63.49    4.00
  -3   4   3   65.59    3.70
  -3   4   3   66.99    3.10
  -2  -4   3 1067.89   29.90
  -2  -4   3 1014.80   28.70
   2  -4  -3 1006.40   29.50
  -2  -4   3 1057.09   29.80
   2  -4  -3 1020.40   29.50
   2  -4  -3 1045.20   29.60
  -2  -4   3  996.40   29.80
  -2   4   3 1017.70   29.00
   2   4  -3 1058.19   29.60
   2   4  -3 1019.10   29.30
  -2   4   3  999.70   29.20
  -2   4   3 1045.20   29.20
  -2   4   3 1070.39   30.00
  -1  -4   3 1099.39   30.50
   1  -4  -3 1087.89   31.30
  -1  -4   3 1079.49   30.90
  -1  -4   3 1119.59   31.00
  -1  -4   3 1096.39   31.80
  -1  -4   3 1059.19   30.90
   1  -4  -3 1083.49   31.40
   1  -4  -3 1096.19   31.40
  -1   4   3 1151.08   31.80
   1   4  -3 1151.08   30.50
   1   4  -3 1070.39   30.50
  -1   4   3 1109.89   31.10
  -1   4   3 1088.79   30.70
   1   4  -3 1108.99   30.70
   0  -4  -3   29.80    2.80
   0  -4   3   34.10    2.20
   0  -4  -3   36.40    3.10
   0  -4  -3   33.60    2.50
   0  -4   3   44.90    3.80
   0  -4   3   39.70    3.50
   0  -4  -3   34.50    3.10
   0   4   3   35.40    3.10
   0   4   3   38.60    2.80
   0   4   3   39.20    3.30
   0   4  -3   32.50    2.00
   0   4  -3   37.20    2.10
  -1  -4  -3   12.40    1.70
   1  -4   3   19.70    2.80
  -1  -4  -3   19.00    2.50
  -1  -4  -3   18.10    2.40
  -1  -4  -3   19.90    2.40
  -1  -4  -3   14.00    2.40
   1  -4   3   16.10    2.30
   1   4   3   17.70    2.50
   1   4   3   15.30    2.50
   1   4   3   12.00    2.10
  -1   4  -3   16.50    1.50
  -2  -4  -3  458.95   14.80
  -2  -4  -3  478.45   15.70
  -2  -4  -3  489.85   15.60
   2  -4   3  485.35   15.60
   2  -4   3  471.75   13.90
  -2  -4  -3  477.35   15.60
  -2  -4  -3  478.85   15.10
   2  -4   3  459.85   15.10
  -2   4  -3  475.75   13.60
  -2   4  -3  488.65   13.70
   2   4   3  485.75   15.60
   2   4   3  481.75   15.80
   2   4   3  467.55   15.30
  -3  -4  -3  417.16   14.30
  -3  -4  -3  433.96   14.50
  -3  -4  -3  411.26   13.80
  -3  -4  -3  410.96   14.40
   3  -4   3  409.36   12.70
   3  -4   3  395.36   13.90
  -3  -4  -3  407.76   13.80
  -3   4  -3  420.66   12.50
   3   4   3  398.56   14.50
   3   4   3  417.06   14.10
  -3   4  -3  400.16   12.40
   3   4   3  435.66   14.50
  -4  -4  -3   11.90    2.30
   4  -4   3   12.60    2.70
  -4  -4  -3    8.10    2.20
  -4  -4  -3   11.70    2.60
  -4  -4  -3   11.00    3.00
   4  -4   3    9.40    2.00
  -4   4  -3    8.90    1.80
   4   4   3   10.10    2.60
  -4   4  -3    8.50    1.70
   4   4   3   10.60    2.50
   4   4   3   11.80    2.90
  -5  -4  -3   59.49    6.10
  -5  -4  -3   41.50    4.80
  -5  -4  -3   52.19    5.20
  -5  -4  -3   50.19    5.30
   5  -4   3   47.20    4.40
   5  -4   3   47.20    5.10
   5   4   3   40.60    4.60
   5   4   3   59.79    5.50
   5   4   3   49.30    5.10
  -5   4  -3   48.30    4.20
   5   4   3   60.29    6.30
  -5   4  -3   48.70    3.50
   6  -4   3   58.99    5.50
  -6  -4  -3   68.19    6.30
  -6  -4  -3   69.49    6.70
  -6  -4  -3   77.99    7.10
  -6   4  -3   62.19    5.20
   6   4   3   76.59    7.10
  -6   4  -3   64.19    6.20
   6   4   3   63.59    6.20
   6   4   3   50.29    5.20
  -7  -4  -3  147.69    8.30
   7  -4   3  145.79    6.30
   7  -4   3  154.68    8.00
  -7  -4  -3  151.28    8.90
  -7  -4  -3  139.89    8.60
  -7   4  -3  149.49    7.50
  -7   4  -3  150.68    8.80
   7   4   3  156.58    9.00
   8  -4   3   30.60    4.80
  -8  -4  -3   41.80    6.10
   8  -4   3   28.80    3.40
   8  -4   3   30.90    3.60
  -8  -4  -3   40.90    6.30
  -8  -4  -3   45.60    6.50
  -8   4  -3   28.60    4.40
   8   4   3   26.40    4.90
  -8   4  -3   26.10    5.00
   9  -4   3   44.50    4.50
   9  -4   3   47.80    4.60
  -9  -4  -3   38.40    6.50
   9  -4   3   43.20    6.10
  -9  -4  -3   50.89    7.10
  -9  -4  -3   43.50    6.40
  -9   4  -3   45.60    5.70
   9   4   3   48.20    7.10
  -9   4  -3   39.80    6.30
  10  -4   3   74.09    8.60
  10  -4   3   75.69    5.50
 -10  -4  -3   64.69    8.30
 -10  -4  -3   62.59    8.20
  10  -4   3   74.49    5.40
 -10   4  -3   59.99    6.90
 -10   4  -3   62.39    8.40
  10   4   3   71.39    9.50
  11  -4   3   13.90    3.50
 -11  -4  -3   12.90    5.00
  11  -4   3    9.50    4.60
 -11   4  -3   18.60    5.10
 -11   4  -3   10.20    4.80
  11   4   3   16.00    5.70
 -12  -4  -3    6.00    5.20
  12  -4   3   -1.50    4.10
 -12   4  -3    3.80    5.00
  12   4   3   -0.80    3.40
 -12   4  -3   -0.40    3.60
  13  -4   3   30.30    7.10
 -13   4  -3   37.10    8.00
  13   4   3   25.50    6.70
 -13   4  -3    8.80    5.50
  13  -5  -3   39.20    5.60
  13  -5  -3   49.60    6.20
  13  -5  -3   30.90    7.30
 -13   5   3   40.80    7.70
  13   5  -3   39.90    8.30
  12  -5  -3    3.50    3.20
  12  -5  -3    3.30    4.20
 -12  -5   3    9.10    4.90
  12  -5  -3   11.10    3.90
 -12   5   3    0.10    3.60
  12   5  -3    4.50    4.70
  11  -5  -3   95.99    9.90
  11  -5  -3   81.59    7.10
 -11  -5   3   77.29    8.90
  11  -5  -3   81.99    6.90
 -11   5   3   96.19    8.90
 -11   5   3   93.39    9.60
  11   5  -3   61.69    8.30
  10  -5  -3  228.78   10.40
  10  -5  -3  233.38   12.20
 -10  -5   3  232.18   13.10
  10  -5  -3  215.58   10.00
 -10   5   3  222.28   11.50
  10   5  -3  226.58   13.00
 -10   5   3  232.78   12.10
   9  -5  -3   77.89    5.80
   9  -5  -3   72.59    5.60
   9  -5  -3   80.39    8.10
  -9  -5   3   95.89    9.20
   9   5  -3   86.99    9.10
  -9   5   3  100.59    8.70
  -9   5   3   78.49    7.60
   8  -5  -3   63.39    4.80
   8  -5  -3   51.29    4.80
   8  -5  -3   57.79    6.40
  -8  -5   3   56.69    7.20
  -8   5   3   67.59    6.50
   8   5  -3   50.69    6.40
   8   5  -3   58.19    6.90
  -8   5   3   64.29    6.20
   7  -5  -3    6.30    2.00
  -7  -5   3    6.90    2.60
   7  -5  -3    8.50    2.90
  -7  -5   3    5.60    2.70
  -7  -5   3   12.20    3.60
   7  -5  -3    4.50    1.90
   7   5  -3    5.90    2.90
  -7   5   3    3.60    2.20
   7   5  -3    6.90    2.80
  -7   5   3    7.80    2.70
  -6  -5   3   89.29    6.40
   6  -5  -3   92.79    4.80
  -6  -5   3   76.49    5.50
   6  -5  -3   75.69    5.40
   6  -5  -3   86.29    4.70
  -6  -5   3   97.69    6.40
  -6  -5   3   94.69    6.30
   6   5  -3   84.19    6.20
   6   5  -3   80.79    5.90
  -6   5   3   92.39    4.90
  -6   5   3   84.79    5.30
  -6   5   3   89.59    5.40
  -6   5   3  101.59    5.50
  -5  -5   3   65.79    5.60
  -5  -5   3   65.29    4.60
  -5  -5   3   54.29    5.00
   5  -5  -3   58.29    4.30
  -5  -5   3   70.89    5.30
   5  -5  -3   61.29    3.70
   5  -5  -3   62.59    3.70
  -5   5   3   69.09    4.30
  -5   5   3   69.19    4.30
  -5   5   3   63.29    4.00
   5   5  -3   69.49    5.20
   5   5  -3   70.39    5.70
  -5   5   3   62.19    3.80
  -4  -5   3   18.80    3.10
  -4  -5   3   20.00    3.00
   4  -5  -3   16.40    2.60
   4  -5  -3   15.20    2.00
  -4  -5   3   17.50    3.10
   4  -5  -3   18.10    2.00
   4   5  -3   22.40    3.30
  -4   5   3   23.70    2.40
  -4   5   3   16.10    2.20
  -4   5   3   18.90    2.40
   4   5  -3   15.10    2.90
  -4   5   3   25.20    2.90
  -3  -5   3  893.91   26.90
  -3  -5   3  930.91   27.00
  -3  -5   3  904.71   26.90
   3  -5  -3  865.21   25.70
   3  -5  -3  879.61   25.70
   3  -5  -3  870.71   26.10
  -3   5   3  893.01   25.60
   3   5  -3  932.51   26.80
  -3   5   3  915.91   25.90
  -3   5   3  882.41   25.60
   3   5  -3  907.21   26.50
   2  -5  -3  427.46   13.10
  -2  -5   3  408.46   13.40
  -2  -5   3  428.96   13.50
   2  -5  -3  430.16   13.10
   2  -5  -3  435.86   14.20
  -2  -5   3  427.16   13.30
  -2  -5   3  425.36   13.70
  -2  -5   3  438.46   13.60
   2  -5  -3  426.56   13.50
   2   5  -3  417.06   13.50
  -2   5   3  459.15   13.50
  -2   5   3  426.66   13.10
   2   5  -3  425.66   13.40
  -2   5   3  424.96   13.20
  -2   5   3  431.06   13.60
  -1  -5   3    4.70    2.00
  -1  -5   3    3.70    1.50
   1  -5  -3    3.80    1.30
   1  -5  -3    6.40    1.90
   1  -5  -3    4.20    1.30
  -1  -5   3    5.10    1.80
  -1   5   3    5.40    1.50
   1   5  -3    4.40    1.30
   1   5  -3    4.90    1.20
  -1   5   3    4.50    1.70
  -1   5   3    6.50    1.60
   1   5  -3    4.90    1.30
  -1   5   3    4.90    1.40
   0  -5   3  309.77   11.20
   0  -5  -3  301.77   10.70
   0  -5  -3  311.57   10.60
   0  -5   3  322.97    9.50
   0  -5  -3  313.07   10.40
   0  -5   3  309.07   10.50
   0  -5  -3  318.37   10.50
   0   5   3  307.97   10.40
   0   5   3  313.57   10.80
   0   5   3  314.77   10.40
   0   5  -3  315.27    9.30
   0   5  -3  315.97    9.40
  -1  -5  -3  452.15   15.00
   1  -5   3  468.05   15.40
   1  -5   3  446.36   14.60
  -1  -5  -3  468.75   14.70
  -1  -5  -3  459.25   13.90
  -1  -5  -3  456.95   14.80
  -1  -5  -3  466.25   15.00
   1   5   3  461.25   14.80
   1   5   3  472.75   15.30
   1   5   3  462.15   14.70
   2  -5   3  278.37   10.70
  -2  -5  -3  295.47   10.50
  -2  -5  -3  283.37    9.80
  -2  -5  -3  295.87   10.70
   2  -5   3  272.17   10.30
  -2  -5  -3  288.97   10.70
   2   5   3  279.87   10.70
   2   5   3  278.47   10.30
   2   5   3  300.87   10.60
  -3  -5  -3   85.99    4.90
  -3  -5  -3   97.69    5.50
  -3  -5  -3   78.49    5.30
  -3  -5  -3   94.89    5.50
  -3  -5  -3   89.29    5.00
   3  -5   3   90.29    5.30
  -3   5  -3   91.39    3.70
   3   5   3   92.69    5.30
   3   5   3   82.59    5.20
  -3   5  -3   86.09    3.70
   3   5   3   91.19    5.50
  -4  -5  -3  438.36   15.70
   4  -5   3  422.96   15.20
  -4  -5  -3  426.56   15.00
  -4  -5  -3  419.06   15.60
  -4  -5  -3  416.56   15.10
  -4  -5  -3  455.85   15.80
   4  -5   3  440.26   13.80
  -4   5  -3  446.06   13.40
   4   5   3  440.76   15.40
   4   5   3  450.65   15.70
  -4   5  -3  439.76   13.50
   4   5   3  426.46   15.90
  -5  -5  -3  105.49    6.30
  -5  -5  -3  103.29    6.70
   5  -5   3  110.79    6.80
  -5  -5  -3  122.89    7.20
  -5  -5  -3  114.29    7.00
  -5  -5  -3  111.79    6.70
   5  -5   3  108.09    5.60
   5   5   3  113.99    7.00
   5   5   3  103.89    6.80
  -5   5  -3  119.59    5.40
  -5   5  -3  116.69    5.40
   5   5   3  122.69    6.80
  -6  -5  -3   16.10    3.30
   6  -5   3   27.80    3.70
  -6  -5  -3   22.10    4.30
  -6  -5  -3   16.50    2.90
  -6   5  -3   16.60    3.60
   6   5   3   22.10    3.90
  -6   5  -3   25.60    3.40
   6   5   3   18.40    3.60
  -6   5  -3   21.90    3.10
  -7  -5  -3   72.69    7.50
  -7  -5  -3  105.59    9.20
   7  -5   3   78.19    5.80
  -7  -5  -3  101.19    8.70
  -7   5  -3   86.39    8.20
   7   5   3   96.89    9.20
  -7   5  -3   83.29    5.50
   7   5   3   90.59    7.90
  -8  -5  -3   51.29    6.10
  -8  -5  -3   61.49    7.10
  -8  -5  -3   81.49    8.20
   8  -5   3   74.79    7.10
  -8   5  -3   73.99    7.40
   8   5   3   65.09    7.80
  -8   5  -3   65.59    6.10
  -9  -5  -3   25.90    5.30
  -9  -5  -3   32.80    6.20
   9  -5   3   36.50    5.80
  -9   5  -3   30.50    4.70
   9   5   3   30.70    6.30
  -9   5  -3   34.60    6.10
  10  -5   3   11.70    4.40
 -10  -5  -3   14.60    5.10
 -10  -5  -3   12.00    5.00
  10   5   3   21.10    6.20
 -10   5  -3    9.50    4.40
 -11  -5  -3   32.60    7.00
 -11  -5  -3   39.10    7.60
  11  -5   3   33.40    6.80
 -11   5  -3   23.50    5.50
  11   5   3   42.00    7.20
 -11   5  -3   25.50    6.30
  12  -5   3    9.70    5.20
 -12   5  -3    4.80    4.20
  12   5   3   10.10    5.40
 -12   5  -3   11.60    5.50
 -13  -6   3    8.30    5.10
  13  -6  -3    0.40    4.10
 -13   6   3    7.90    4.70
  13   6  -3   -5.20    4.00
  12  -6  -3    4.50    4.40
 -12  -6   3   13.60    5.60
 -12   6   3    4.50    4.10
  12   6  -3    7.00    5.40
 -11  -6   3   -0.10    4.10
  11  -6  -3    1.50    3.70
  11   6  -3    3.20    4.60
 -11   6   3    4.90    3.60
 -11   6   3   -3.90    3.30
 -10  -6   3   12.80    4.80
  10  -6  -3   18.80    4.90
  10   6  -3   21.90    5.20
 -10   6   3   12.60    4.00
 -10   6   3   16.90    4.70
  -9  -6   3   -0.30    3.40
   9  -6  -3    2.80    2.00
   9  -6  -3    1.50    3.20
   9  -6  -3    3.20    2.10
  -9   6   3    2.80    3.10
   9   6  -3    0.30    3.20
  -9   6   3    0.70    2.70
   8  -6  -3   33.10    3.50
   8  -6  -3   34.90    4.80
  -8  -6   3   31.20    5.80
   8   6  -3   25.00    4.70
  -8   6   3   31.70    4.60
  -8   6   3   36.60    4.60
   8   6  -3   26.00    4.80
  -7  -6   3  317.57   13.90
  -7  -6   3  311.67   13.90
  -7  -6   3  305.77   13.80
   7  -6  -3  320.47   12.80
   7   6  -3  344.67   13.90
  -7   6   3  319.07   12.30
  -7   6   3  348.97   12.80
   7   6  -3  319.77   13.90
  -6  -6   3   11.10    3.30
  -6  -6   3   11.40    2.80
  -6  -6   3   14.60    3.20
  -6  -6   3   11.20    3.00
   6  -6  -3   21.20    3.40
  -6  -6   3   16.30    3.20
   6   6  -3   13.40    3.60
   6   6  -3   11.70    3.00
  -6   6   3   14.10    2.70
  -5  -6   3  136.09    7.30
  -5  -6   3  147.19    7.60
  -5  -6   3  140.59    7.70
  -5  -6   3  134.79    7.30
  -5  -6   3  147.09    7.60
   5  -6  -3  145.79    6.80
   5   6  -3  153.28    7.60
  -5   6   3  147.59    6.50
   5   6  -3  145.89    7.60
  -5   6   3  149.69    6.40
  -5   6   3  143.89    6.50
  -5   6   3  137.79    5.70
  -4  -6   3  207.98    8.50
  -4  -6   3  181.48    8.20
   4  -6  -3  182.88    7.50
  -4  -6   3  176.18    8.30
  -4  -6   3  177.78    8.10
  -4   6   3  195.18    6.90
  -4   6   3  184.78    7.00
   4   6  -3  193.58    8.40
  -4   6   3  193.38    7.50
   4   6  -3  195.38    8.40
  -4   6   3  193.18    7.30
  -3  -6   3  310.67   11.30
  -3  -6   3  310.77   10.60
  -3  -6   3  309.17   11.00
   3  -6  -3  316.57   10.70
  -3  -6   3  322.27   11.10
   3   6  -3  318.07   11.10
   3   6  -3  307.87   11.10
  -3   6   3  306.47   10.30
  -3   6   3  296.97   10.00
  -3   6   3  321.97   10.50
  -2  -6   3  346.97   11.00
  -2  -6   3  341.17   12.40
  -2  -6   3  322.47   11.10
  -2  -6   3  331.07   10.90
   2  -6  -3  328.57   11.90
   2  -6  -3  316.67   11.00
  -2  -6   3  333.87   11.30
   2   6  -3  345.27   11.00
  -2   6   3  330.97   10.40
  -2   6   3  328.37   10.80
   2   6  -3  323.57   11.10
  -2   6   3  351.96   11.00
  -2   6   3  336.87   11.20
   2   6  -3  333.57   10.90
   1  -6  -3  260.47    9.90
  -1  -6   3  260.47    8.90
  -1  -6   3  273.77   10.50
   1  -6  -3  269.77    8.90
   1  -6  -3  271.17    8.80
  -1  -6   3  268.67    9.50
  -1   6   3  250.77    9.00
  -1   6   3  276.47    9.60
  -1   6   3  280.17    9.30
  -1   6   3  249.48    8.80
   1   6  -3  272.67    8.90
   1   6  -3  270.87    8.70
   0  -6   3    4.20    2.20
   0  -6  -3    3.60    1.80
   0  -6  -3    5.60    1.50
   0  -6  -3    5.10    1.50
   0  -6   3    2.60    1.80
   0  -6   3    8.20    1.40
   0  -6  -3    6.60    1.90
   0   6   3   10.50    2.00
   0   6  -3    6.40    1.20
   0   6   3    4.20    1.70
   0   6  -3    6.50    1.20
   0   6   3    4.70    1.60
  -1  -6  -3  116.39    5.40
  -1  -6  -3  103.49    5.50
   1  -6   3  114.29    5.60
   1  -6   3  103.69    5.90
  -1  -6  -3  112.79    5.60
  -1  -6  -3  110.59    5.50
   1   6   3  109.49    5.40
   1   6   3  108.19    5.40
   1   6   3  110.89    5.70
  -2  -6  -3    9.50    2.10
  -2  -6  -3    5.20    1.90
   2  -6   3    4.00    2.10
  -2  -6  -3    6.20    2.20
   2  -6   3    7.00    2.20
   2   6   3    6.70    2.10
   2   6   3    4.70    1.70
   2   6   3    6.70    2.10
  -3  -6  -3   16.00    2.60
  -3  -6  -3   13.40    2.70
  -3  -6  -3   15.20    3.00
   3  -6   3   14.90    3.20
  -3  -6  -3   20.00    2.90
  -3  -6  -3   11.50    2.70
   3   6   3   20.80    3.20
   3   6   3   21.40    3.60
   3   6   3   13.70    2.60
  -4  -6  -3   10.90    2.60
  -4  -6  -3    8.50    2.40
  -4  -6  -3   10.40    2.60
  -4  -6  -3    8.40    2.60
   4  -6   3    7.20    1.60
   4  -6   3    8.40    2.70
  -4  -6  -3    9.20    2.30
  -4   6  -3   10.50    1.70
   4   6   3   13.20    3.40
  -4   6  -3    9.60    1.70
   4   6   3   11.60    3.00
   4   6   3    7.00    2.40
  -5  -6  -3   -2.00    1.40
  -5  -6  -3   -1.70    2.00
   5  -6   3   -0.20    2.10
  -5  -6  -3    1.60    1.90
  -5  -6  -3    0.60    1.70
  -5  -6  -3   -1.50    1.60
   5  -6   3   -0.10    1.50
   5   6   3    0.50    2.00
   5   6   3    0.60    1.80
   5   6   3   -0.50    1.60
  -5   6  -3    3.00    1.60
  -5   6  -3   -1.00    1.10
  -6  -6  -3    3.60    2.50
  -6  -6  -3    2.50    2.00
  -6  -6  -3    1.90    2.50
   6  -6   3    3.70    2.60
   6  -6   3    0.60    1.80
  -6   6  -3    2.70    1.60
  -6   6  -3    1.60    2.40
   6   6   3    3.70    2.70
   6   6   3    4.80    2.70
  -6   6  -3    2.00    1.60
  -7  -6  -3   15.40    4.10
   7  -6   3   18.70    3.50
  -7  -6  -3   15.60    4.10
   7   6   3   12.10    3.70
   7   6   3   11.60    3.50
  -7   6  -3   10.80    3.70
  -7   6  -3   10.00    2.50
  -8  -6  -3    5.00    3.40
  -8  -6  -3   12.70    4.50
   8  -6   3    5.60    3.00
  -8   6  -3    9.30    2.90
  -8   6  -3    6.30    3.50
   8   6   3    5.60    3.40
  -9  -6  -3   32.20    5.90
   9  -6   3   47.80    6.30
  -9  -6  -3   48.10    7.00
  -9   6  -3   43.40    6.60
   9   6   3   43.90    7.20
  -9   6  -3   49.99    5.90
  10  -6   3    7.20    4.00
 -10  -6  -3    9.30    5.20
 -10   6  -3   11.80    4.70
  10   6   3    5.40    4.30
 -10   6  -3   18.70    4.40
  11  -6   3   25.70    6.00
 -11  -6  -3   22.80    6.40
  11   6   3   13.80    5.00
 -11   6  -3   11.50    5.40
 -11   6  -3   13.50    4.50
  12  -6   3   -3.20    3.90
 -12   6  -3    4.00    4.10
 -12   6  -3   -1.40    4.40
  12   6   3    6.80    5.40
 -13  -7   3   22.20    6.00
  13  -7  -3   26.00    6.90
  13   7  -3   45.90    9.50
 -13   7   3   35.00    7.20
  12  -7  -3    1.40    4.40
 -12  -7   3   -0.90    3.80
  12   7  -3   -1.10    4.50
 -12   7   3    2.10    3.90
 -11  -7   3   56.49    8.40
  11  -7  -3   61.69    8.10
  11   7  -3   73.49    9.70
 -11   7   3   70.39    7.90
 -11   7   3   57.19    7.80
  10  -7  -3  159.58    9.90
 -10  -7   3  100.79   10.50
  10   7  -3  135.79   10.40
 -10   7   3  122.69    8.60
 -10   7   3  158.58    9.80
  -9  -7   3   46.00    6.70
   9  -7  -3   43.90    6.20
  -9   7   3   41.90    5.60
  -9   7   3   45.70    5.90
   9   7  -3   27.70    5.60
   8  -7  -3   51.99    5.90
  -8  -7   3   51.59    6.70
   8   7  -3   58.59    7.20
  -8   7   3   66.09    6.30
  -8   7   3   48.60    5.60
   8   7  -3   56.19    6.90
  -7  -7   3  166.28    9.60
  -7  -7   3  176.58    9.60
   7  -7  -3  160.78    8.40
  -7   7   3  158.78    8.00
   7   7  -3  178.98    9.70
   7   7  -3  186.28    9.70
  -6  -7   3   22.60    4.10
  -6  -7   3   16.90    3.70
  -6  -7   3   17.70    4.00
   6  -7  -3   23.30    3.60
   6   7  -3   18.60    3.80
  -6   7   3   15.60    2.80
  -6   7   3   22.70    3.40
   6   7  -3   25.60    4.40
  -5  -7   3    6.50    2.20
  -5  -7   3    9.00    2.60
  -5  -7   3   10.80    3.00
   5  -7  -3   10.90    2.50
   5   7  -3   15.90    3.20
  -5   7   3   11.20    2.40
   5   7  -3   11.10    3.00
  -5   7   3   10.60    2.20
  -5   7   3   14.40    2.50
  -4  -7   3  131.89    7.10
   4  -7  -3  128.19    6.10
  -4  -7   3  131.89    6.70
  -4  -7   3  140.09    6.20
  -4  -7   3  131.29    6.80
   4   7  -3  135.49    7.00
   4   7  -3  130.99    6.70
  -4   7   3  131.89    5.80
  -4   7   3  134.79    5.90
  -3  -7   3  236.98    8.90
  -3  -7   3  258.57    9.40
  -3  -7   3  244.38    9.70
  -3  -7   3  243.78    9.30
   3  -7  -3  245.78    9.00
  -3   7   3  243.68    9.10
  -3   7   3  253.77    8.80
   3   7  -3  243.68    9.30
   3   7  -3  257.87    9.70
  -3   7   3  250.67    8.80
  -2  -7   3   11.10    2.40
  -2  -7   3    8.70    1.70
  -2  -7   3    9.20    2.20
  -2  -7   3    8.60    1.60
  -2  -7   3   14.00    3.10
   2  -7  -3    9.20    2.40
   2   7  -3   12.70    1.90
  -2   7   3   11.20    2.20
   2   7  -3   10.30    2.00
  -2   7   3    7.60    1.70
  -2   7   3   10.80    2.00
   2   7  -3   11.60    2.20
  -1  -7   3   16.10    2.20
   1  -7  -3   18.20    3.00
   1  -7  -3   15.20    1.80
  -1  -7   3   19.10    3.40
   1  -7  -3   17.40    2.60
  -1  -7   3   16.90    2.70
  -1   7   3   17.20    2.40
   1   7  -3   12.20    1.90
  -1   7   3   13.20    2.20
  -1   7   3   12.80    2.30
   1   7  -3   15.10    2.00
  -1   7   3   17.50    2.20
   0  -7   3  104.89    5.40
   0  -7  -3   99.19    4.70
   0  -7   3  102.69    4.10
   0  -7  -3  104.09    4.70
   0  -7  -3   99.39    5.30
   0  -7  -3   90.19    5.40
   0  -7   3  106.19    6.10
   0   7   3   96.49    5.00
   0   7  -3  105.19    4.00
   0   7   3  108.49    5.00
   0   7   3  109.29    5.40
   0   7   3  107.09    5.20
   0   7  -3   97.19    4.00
   1  -7   3  506.95   17.80
  -1  -7  -3  500.75   17.00
   1  -7   3  516.95   16.70
  -1  -7  -3  516.85   17.20
  -1  -7  -3  539.85   16.70
  -1  -7  -3  519.05   16.80
   1   7   3  525.15   16.60
   1   7   3  533.85   17.30
   1   7   3  508.95   16.70
   2  -7   3  111.99    6.50
   2  -7   3   99.79    6.00
  -2  -7  -3  120.49    5.90
  -2  -7  -3  114.19    6.10
  -2  -7  -3  105.69    6.10
  -2  -7  -3  114.59    6.00
   2   7   3  108.79    6.10
   2   7   3  115.99    6.00
   2   7   3  114.59    6.00
   3  -7   3   73.09    5.40
  -3  -7  -3   84.99    5.50
  -3  -7  -3   88.09    5.80
  -3  -7  -3   89.09    5.60
   3  -7   3   80.99    5.90
   3   7   3   77.09    5.30
   3   7   3   82.89    5.40
   3   7   3   83.79    5.70
  -4  -7  -3  479.55   17.20
  -4  -7  -3  459.05   16.40
  -4  -7  -3  484.55   17.40
  -4  -7  -3  482.45   17.30
   4  -7   3  464.25   16.90
   4   7   3  470.05   17.70
   4   7   3  489.95   17.00
   4   7   3  499.35   17.30
   5  -7   3  200.88   10.00
  -5  -7  -3  202.28    9.50
  -5  -7  -3  213.88   10.20
  -5  -7  -3  200.08   10.20
   5  -7   3  200.08    7.80
  -5   7  -3  213.38    7.70
   5   7   3  201.38    9.80
  -5   7  -3  206.48    7.60
   5   7   3  210.28   10.10
   5   7   3  192.98   10.10
   6  -7   3    0.80    2.50
  -6  -7  -3   -0.50    2.70
   6  -7   3    3.40    1.90
   6   7   3    5.80    3.10
  -6   7  -3    3.80    1.90
   6   7   3    6.90    3.10
  -6   7  -3    5.10    2.10
  -7  -7  -3   69.99    7.90
   7  -7   3   75.99    6.50
   7   7   3   86.19    8.00
   7   7   3   84.29    8.00
  -7   7  -3   77.99    8.00
  -7   7  -3   70.59    5.10
  -8  -7  -3  123.79    9.40
   8  -7   3  124.39    7.60
  -8   7  -3  123.89    7.20
  -8   7  -3  138.59    9.30
   8   7   3  105.79    9.80
   9  -7   3   31.20    5.20
  -9  -7  -3   28.20    5.90
  -9   7  -3   29.50    4.70
  -9   7  -3   26.10    5.60
   9   7   3   34.40    6.90
  10  -7   3    5.40    4.00
 -10  -7  -3   10.90    4.80
 -10   7  -3   -0.50    2.80
 -10   7  -3   -0.70    3.60
  10   7   3   11.40    5.10
 -11  -7  -3    2.50    4.50
  11  -7   3   14.10    5.40
 -11   7  -3   16.80    4.30
  11   7   3   26.10    7.40
 -11   7  -3   13.60    5.50
 -12  -7  -3   23.60    6.80
  12  -7   3   26.30    6.70
  12   7   3   26.80    7.30
 -12   7  -3   15.00    6.40
 -12   7  -3   18.60    5.40
 -12  -8   3   24.50    7.30
  12  -8  -3   26.50    6.80
 -12   8   3   21.30    5.70
  12   8  -3   24.80    6.80
 -11  -8   3   29.70    7.00
  11  -8  -3   20.40    5.60
  11   8  -3   18.50    6.50
 -11   8   3   25.60    6.00
  10  -8  -3   -5.60    3.00
 -10  -8   3   -1.50    3.70
 -10   8   3    0.70    3.00
  10   8  -3   -4.20    3.40
   9  -8  -3   78.29    7.80
  -9  -8   3   59.09    7.90
  -9   8   3   73.59    7.40
   9   8  -3   94.89   10.40
   8  -8  -3   71.89    7.00
  -8  -8   3   58.49    7.50
   8   8  -3   69.79    7.90
  -8   8   3   73.89    6.60
   8   8  -3   80.09    8.20
  -8   8   3   62.09    6.00
  -7  -8   3   10.90    3.60
  -7  -8   3    6.60    3.40
   7  -8  -3    9.00    3.00
   7   8  -3    5.90    3.70
  -7   8   3    4.80    2.60
   7   8  -3    8.60    3.20
  -7   8   3    6.80    2.50
   6  -8  -3  118.49    6.50
  -6  -8   3  106.09    7.10
  -6  -8   3  112.29    7.80
  -6  -8   3  112.99    7.50
   6   8  -3  111.29    7.30
  -6   8   3  105.59    5.90
   6   8  -3  109.29    7.30
  -6   8   3  122.19    6.10
  -5  -8   3   72.49    4.60
   5  -8  -3   70.49    4.70
  -5  -8   3   61.09    5.70
  -5  -8   3   70.59    6.30
  -5  -8   3   70.59    6.10
   5   8  -3   65.49    6.00
  -5   8   3   69.79    4.40
   5   8  -3   61.39    6.00
  -5   8   3   72.09    4.50
  -5   8   3   66.09    4.10
   4  -8  -3  148.09    6.70
  -4  -8   3  149.79    7.30
  -4  -8   3  160.08    7.40
  -4  -8   3  165.68    8.00
  -4  -8   3  143.19    6.60
  -4   8   3  153.28    6.50
   4   8  -3  157.68    7.70
   4   8  -3  161.08    7.50
  -4   8   3  158.38    6.70
  -3  -8   3   21.80    3.90
   3  -8  -3    8.60    2.10
  -3  -8   3   14.10    2.70
  -3  -8   3   16.80    2.60
  -3  -8   3   13.70    2.40
  -3  -8   3   15.70    2.90
  -3   8   3    9.20    2.10
  -3   8   3   14.80    2.20
   3   8  -3   17.30    2.90
  -3   8   3   15.60    2.40
   3   8  -3   12.00    2.50
   3   8  -3   12.70    2.30
  -3   8   3   12.70    2.30
   2  -8  -3    1.90    2.20
  -2  -8   3    3.20    1.90
  -2  -8   3   -2.30    2.00
  -2  -8   3    0.90    1.60
   2   8  -3    1.50    1.50
  -2   8   3    0.50    1.50
  -2   8   3    0.60    1.30
   2   8  -3    0.90    1.20
   2   8  -3    0.70    1.30
  -2   8   3    1.80    1.50
   1  -8  -3  159.88    7.70
  -1  -8   3  139.49    7.80
  -1  -8   3  155.78    6.20
   1  -8  -3  155.68    6.80
  -1  -8   3  153.28    6.90
  -1   8   3  158.18    6.80
   1   8  -3  150.28    5.90
  -1   8   3  158.98    6.60
  -1   8   3  147.39    6.40
   1   8  -3  153.88    6.10
  -1   8   3  143.29    5.70
   0  -8   3    2.70    2.30
   0  -8  -3    6.50    1.60
   0  -8   3    4.60    2.10
   0  -8  -3    5.50    2.50
   0  -8  -3    8.90    2.20
   0  -8  -3    3.80    1.40
   0   8   3    6.90    1.70
   0   8   3    7.60    2.10
   0   8  -3    7.90    1.40
   0   8   3   10.60    2.50
   0   8  -3    5.20    1.30
   0   8   3    6.90    1.90
  -1  -8  -3    1.20    1.50
  -1  -8  -3    2.30    1.60
  -1  -8  -3    2.40    2.10
   1  -8   3    1.40    1.90
   1  -8   3    4.30    2.30
  -1  -8  -3   -1.30    1.60
   1   8   3    4.90    2.10
   1   8   3    5.10    1.80
   1   8   3    3.70    1.70
  -2  -8  -3  396.16   14.00
  -2  -8  -3  397.96   14.30
   2  -8   3  379.56   14.00
  -2  -8  -3  393.96   14.40
  -2  -8  -3  397.86   13.80
   2  -8   3  391.66   14.90
   2   8   3  380.26   13.70
   2   8   3  397.76   14.00
   2   8   3  394.76   14.50
  -3  -8  -3   43.70    4.50
   3  -8   3   59.09    6.30
   3  -8   3   50.59    5.40
  -3  -8  -3   49.10    5.20
  -3  -8  -3   51.49    4.70
   3   8   3   52.89    5.00
   3   8   3   47.20    5.50
   3   8   3   42.70    4.60
  -4  -8  -3    1.20    2.00
  -4  -8  -3    1.90    2.20
  -4  -8  -3    8.20    3.00
   4  -8   3   -0.30    1.90
   4   8   3   -1.30    1.80
   4   8   3    3.40    2.50
   4   8   3   -1.70    1.60
  -5  -8  -3   41.70    5.10
   5  -8   3   41.20    3.50
  -5  -8  -3   28.70    4.60
   5  -8   3   26.30    4.60
  -5   8  -3   37.50    3.10
  -5   8  -3   39.70    3.20
   5   8   3   37.80    5.30
   5   8   3   39.60    5.10
   5   8   3   38.60    5.40
  -6  -8  -3   33.50    5.40
   6  -8   3   35.30    3.80
   6  -8   3   28.20    5.10
  -6   8  -3   41.70    4.00
   6   8   3   37.00    5.30
   6   8   3   21.90    4.80
   6   8   3   32.90    5.40
  -6   8  -3   28.10    3.30
  -7  -8  -3    1.30    3.10
   7  -8   3    3.10    2.20
   7   8   3    1.70    2.80
   7   8   3   -0.70    2.70
  -7   8  -3   -4.70    2.30
  -7   8  -3    2.30    1.90
  -8  -8  -3   62.59    8.50
   8  -8   3   71.39    6.70
  -8   8  -3   54.59    5.60
  -8   8  -3   69.79    8.10
   8   8   3   63.69    8.10
  -9  -8  -3    1.50    4.00
   9  -8   3    6.20    3.50
   9   8   3    6.30    4.40
  -9   8  -3    7.70    4.20
  -9   8  -3    2.60    2.60
 -10  -8  -3    4.00    4.90
  10  -8   3    1.20    3.30
 -10   8  -3    2.00    3.00
 -10   8  -3    2.20    4.00
  10   8   3    2.10    4.00
 -11  -8  -3    0.40    4.90
  11  -8   3   -3.60    3.70
  11   8   3    1.10    3.90
 -11   8  -3   -1.20    4.40
 -11   8  -3    1.00    3.40
 -12  -8  -3    5.90    5.30
  12  -8   3    3.80    5.20
 -12   8  -3    3.60    5.20
 -12   8  -3    1.30    3.70
  12   8   3    4.20    4.50
  12  -9  -3   13.90    5.40
 -12  -9   3    9.10    6.20
 -12   9   3   -0.30    3.80
  12   9  -3    3.40    5.10
  11  -9  -3   -0.80    4.10
 -11  -9   3    0.50    4.00
 -11   9   3    1.40    3.50
  11   9  -3    4.20    4.90
  10  -9  -3   -5.20    3.10
 -10  -9   3    6.30    4.30
 -10   9   3    1.10    3.30
  10   9  -3   -0.80    3.80
   9  -9  -3    5.10    3.50
  -9  -9   3    2.20    3.70
   9   9  -3   -0.50    3.80
  -9   9   3   -0.70    2.60
  -8  -9   3   14.40    4.50
   8  -9  -3   19.00    4.30
  -8   9   3   21.30    3.80
   8   9  -3   18.90    4.70
  -7  -9   3   31.00    5.70
  -7  -9   3   30.60    4.90
   7  -9  -3   30.40    4.40
   7   9  -3   31.20    5.20
  -7   9   3   25.80    3.80
   7   9  -3   35.30    5.80
  -6  -9   3   50.59    5.70
  -6  -9   3   44.40    5.40
  -6  -9   3   68.49    5.40
   6  -9  -3   44.60    4.80
  -6  -9   3   58.49    6.60
  -6   9   3   39.00    4.10
   6   9  -3   53.29    6.00
   6   9  -3   64.39    6.70
  -5  -9   3   57.49    4.80
  -5  -9   3   46.50    5.10
   5  -9  -3   41.90    4.20
  -5  -9   3   36.00    4.70
  -5  -9   3   45.80    5.70
  -5   9   3   36.30    3.80
   5   9  -3   47.60    5.30
  -5   9   3   39.30    3.80
   5   9  -3   52.59    5.70
  -4  -9   3   52.89    4.50
  -4  -9   3   40.00    4.20
  -4  -9   3   43.50    4.40
  -4  -9   3   41.20    5.00
   4  -9  -3   37.70    3.90
  -4   9   3   36.90    3.50
  -4   9   3   46.20    4.20
  -4   9   3   42.60    3.80
   4   9  -3   43.50    5.10
   4   9  -3   34.70    4.20
  -3  -9   3   17.40    3.00
  -3  -9   3   12.80    2.40
  -3  -9   3   12.10    2.30
  -3  -9   3   16.30    3.70
  -3  -9   3   13.30    3.00
   3  -9  -3   15.50    2.50
   3  -9  -3   11.60    3.40
   3   9  -3   13.70    2.80
  -3   9   3   14.60    2.60
   3   9  -3   11.50    2.20
  -3   9   3   10.90    2.10
  -3   9   3   17.20    2.60
  -2  -9   3   -0.70    1.60
  -2  -9   3    0.60    1.90
   2  -9  -3    3.00    2.30
  -2  -9   3    1.90    2.40
   2   9  -3    0.00    1.50
  -2   9   3    0.00    1.60
   2   9  -3    2.20    1.70
  -2   9   3    0.90    1.40
  -2   9   3    1.00    1.70
   1  -9  -3  251.17   11.20
   1  -9  -3  276.87   10.30
  -1  -9   3  277.27   11.90
  -1  -9   3  275.37    9.60
  -1  -9   3  264.97   10.20
  -1   9   3  264.07    9.80
  -1   9   3  266.57   10.20
   1   9  -3  274.07    9.40
   1   9  -3  270.97    9.50
  -1   9   3  288.67   10.00
   0  -9  -3   70.59    3.80
   0  -9  -3   69.09    3.80
   0  -9  -3   71.19    5.40
   0  -9   3   67.49    6.80
   0  -9  -3   74.89    4.90
   0  -9   3   73.29    4.90
   0   9   3   79.69    4.80
   0   9  -3   66.89    3.40
   0   9   3   75.89    4.70
   0   9   3   65.59    4.80
   0   9  -3   69.79    3.50
   0   9   3   68.99    3.90
  -1  -9  -3   75.99    4.60
  -1  -9  -3   68.69    5.00
  -1  -9  -3   69.79    6.30
   1  -9   3   71.69    6.00
  -1  -9  -3   69.79    4.30
   1  -9   3   74.09    7.30
   1   9   3   78.49    5.20
   1   9   3   83.59    5.20
   1   9   3   68.99    4.40
   1   9   3   67.89    4.80
  -2  -9  -3   18.40    3.10
  -2  -9  -3   19.30    3.00
   2  -9   3   19.80    3.50
  -2  -9  -3   29.40    4.20
   2  -9   3   16.50    3.70
  -2  -9  -3   26.10    3.90
   2   9   3   21.20    3.20
   2   9   3   27.00    3.80
   2   9   3   28.70    4.00
  -3  -9  -3   16.50    3.50
  -3  -9  -3   14.90    3.10
  -3  -9  -3   22.30    4.00
  -3  -9  -3   19.40    3.30
   3  -9   3   22.30    4.20
   3  -9   3   15.10    3.70
   3   9   3   12.80    3.30
   3   9   3   13.90    3.00
   3   9   3   19.60    3.50
   4  -9   3    6.40    3.00
  -4  -9  -3    7.10    3.10
  -4  -9  -3    8.10    2.70
  -4  -9  -3    4.40    2.40
   4   9   3    3.60    2.70
   4   9   3    8.90    3.10
   4   9   3    8.60    3.10
  -5  -9  -3   14.80    4.10
  -5  -9  -3   14.00    3.50
   5  -9   3   11.10    3.60
   5   9   3   12.00    3.70
   5   9   3    8.20    3.20
   5   9   3    9.70    3.40
   6  -9   3    5.00    2.00
  -6  -9  -3    4.30    3.50
  -6   9  -3    5.30    1.90
  -6   9  -3    5.00    1.90
   6   9   3    5.10    3.10
   6   9   3    0.70    2.70
   6   9   3    2.60    2.90
   7  -9   3   12.40    2.90
  -7  -9  -3    8.90    4.30
  -7   9  -3    7.90    2.40
   7   9   3   10.50    4.20
  -7   9  -3   10.10    3.90
   7   9   3    4.70    3.30
   8  -9   3   -2.10    2.30
  -8  -9  -3   -2.90    3.30
   8   9   3   -1.40    3.10
  -8   9  -3    4.20    2.30
  -8   9  -3    6.90    4.10
   9  -9   3    5.10    3.30
  -9  -9  -3    4.80    4.40
  -9   9  -3    7.00    4.30
  -9   9  -3    6.90    3.10
   9   9   3    3.00    3.90
 -10  -9  -3    5.90    4.70
  10  -9   3   -0.60    3.30
  10   9   3    1.10    4.40
 -10   9  -3   -1.70    3.90
 -10   9  -3   -0.40    2.60
  11  -9   3    8.10    4.40
 -11  -9  -3   11.00    5.80
 -11   9  -3    2.40    3.50
 -11   9  -3    5.20    5.10
  11   9   3    0.40    3.90
  12 -10  -3    7.60    5.20
 -12 -10   3    2.60    5.20
 -12  10   3    9.40    5.10
 -11 -10   3    2.30    5.10
  11 -10  -3    8.00    5.10
 -11  10   3    3.90    4.30
 -10 -10   3    3.80    5.00
  10 -10  -3    7.60    4.40
 -10  10   3    4.60    3.40
  -9 -10   3   37.20    7.10
   9 -10  -3   36.50    5.70
   9  10  -3   25.90    5.90
  -9  10   3   33.60    5.20
  -8 -10   3   66.69    8.20
   8 -10  -3   76.89    7.00
   8  10  -3   53.29    7.30
  -8  10   3   50.69    5.60
  -7 -10   3    2.60    3.30
   7 -10  -3    0.00    2.40
  -7 -10   3   -2.90    2.60
  -7  10   3   -2.30    1.70
   7  10  -3    2.50    2.90
  -6 -10   3   34.60    5.50
   6 -10  -3   41.00    4.60
  -6 -10   3   41.60    5.50
  -6 -10   3   51.29    5.90
  -6 -10   3   46.90    4.60
  -6  10   3   46.10    4.50
   6  10  -3   42.60    5.90
  -5 -10   3  216.48    9.00
   5 -10  -3  223.58    9.20
  -5 -10   3  249.18   10.50
  -5 -10   3  229.48   10.30
  -5 -10   3  228.78   11.00
   5  10  -3  229.68   10.80
  -5  10   3  224.78    8.90
  -4 -10   3    3.10    2.20
  -4 -10   3    1.50    2.10
  -4 -10   3    5.10    3.40
  -4 -10   3    2.40    2.60
   4 -10  -3   -0.40    1.60
  -4 -10   3   -0.20    1.90
  -4  10   3    1.30    1.80
   4  10  -3    4.70    2.50
  -4  10   3    2.10    1.80
  -4  10   3    2.60    2.10
  -3 -10   3   33.60    3.20
  -3 -10   3   31.50    4.30
  -3 -10   3   40.50    5.80
   3 -10  -3   33.90    5.10
  -3 -10   3   31.10    3.90
  -3  10   3   42.70    4.30
  -3  10   3   35.50    3.60
   3  10  -3   33.70    4.20
  -3  10   3   35.00    3.50
  -2 -10   3    7.80    2.40
   2 -10  -3    7.80    2.30
   2 -10  -3   10.70    3.40
  -2 -10   3   14.40    3.80
  -2 -10   3   10.20    2.80
   2  10  -3    4.50    2.10
  -2  10   3   10.50    2.70
  -2  10   3   12.00    2.50
   2  10  -3    9.90    2.40
  -2  10   3   12.40    2.50
  -1 -10   3   34.10    5.30
  -1 -10   3   36.90    3.60
  -1 -10   3   34.70    4.20
   1 -10  -3   34.60    4.00
   1 -10  -3   37.10    5.10
  -1  10   3   41.70    4.30
   1  10  -3   35.20    3.30
  -1  10   3   27.50    3.30
  -1  10   3   38.30    3.80
   1  10  -3   31.70    3.30
   0 -10   3  163.88    6.30
   0 -10  -3  167.68    8.80
   0 -10   3  166.88    9.30
   0 -10  -3  162.28    7.80
   0 -10   3  166.98    7.90
   0  10  -3  166.48    6.30
   0  10   3  164.38    7.80
   0  10  -3  156.18    6.10
   0  10   3  166.88    7.50
   0  10   3  166.38    7.50
   1 -10   3   36.40    4.70
  -1 -10  -3   48.80    3.80
  -1 -10  -3   46.80    4.00
  -1 -10  -3   53.89    5.30
  -1 -10  -3   40.00    5.30
   1 -10   3   46.80    6.10
   1  10   3   52.59    5.40
   1  10   3   46.60    4.70
  -2 -10  -3  211.08   10.40
  -2 -10  -3  224.88    9.20
   2 -10   3  242.98   11.40
  -2 -10  -3  226.68    9.40
  -2 -10  -3  218.28   10.00
   2 -10   3  220.58   10.10
   2  10   3  207.88    9.70
   2  10   3  211.48    9.10
   2  10   3  224.38   10.20
  -3 -10  -3  183.28    9.40
   3 -10   3  183.28   10.20
   3 -10   3  176.88    9.30
  -3 -10  -3  199.78    8.90
  -3 -10  -3  189.98    9.00
  -3 -10  -3  173.18    9.20
   3  10   3  175.78    9.40
   3  10   3  175.08    8.60
   3  10   3  182.78    9.20
  -4 -10  -3   55.99    6.40
  -4 -10  -3   53.89    5.60
  -4 -10  -3   58.99    5.90
  -4 -10  -3   40.10    5.50
   4 -10   3   47.20    5.90
   4  10   3   60.39    6.20
   4  10   3   60.79    6.40
   4  10   3   52.79    6.10
  -5 -10  -3   -2.50    2.40
   5 -10   3   -1.10    2.60
  -5 -10  -3    1.00    3.10
  -5 -10  -3    0.80    2.60
   5  10   3    0.80    2.50
   5  10   3    1.30    2.70
   5  10   3   -1.70    2.60
  -6 -10  -3   86.59    8.80
  -6 -10  -3   86.09    8.10
   6  10   3   81.49    8.40
   6  10   3   75.49    9.10
   6  10   3   92.59    9.10
  -7 -10  -3   21.60    5.30
   7 -10   3   36.00    4.30
   7  10   3   30.00    5.60
   7  10   3   42.00    6.40
  -7  10  -3   25.80    5.30
  -7  10  -3   27.10    3.40
   8 -10   3   13.20    3.50
  -8 -10  -3   15.30    5.30
   8  10   3   17.00    4.90
  -8  10  -3   16.90    3.30
  -8  10  -3   20.70    5.30
  -9 -10  -3    7.40    4.70
   9 -10   3   10.20    3.30
  -9  10  -3   -4.30    3.50
   9  10   3    5.00    4.00
  -9  10  -3    6.80    2.80
 -10 -10  -3   60.49    8.90
  10 -10   3   93.59    8.50
 -10  10  -3   83.99   10.00
  10  10   3   57.79    8.40
 -10  10  -3   58.59    6.50
 -11 -10  -3   22.70    7.40
  11 -10   3   23.60    6.00
 -11  10  -3   15.60    6.30
  11  10   3   17.10    6.10
 -11  10  -3   22.40    4.90
 -11 -11   3    1.30    5.40
  11 -11  -3   13.30    5.20
 -11  11   3   14.20    5.00
 -10 -11   3    2.80    4.90
  10 -11  -3    8.00    4.30
 -10  11   3    5.20    3.60
   9 -11  -3    4.60    3.70
  -9 -11   3    3.50    4.30
  -9  11   3    0.50    2.60
   9  11  -3    5.80    4.20
   8 -11  -3    1.80    2.80
  -8 -11   3    7.30    4.20
   8  11  -3    1.70    3.40
  -8  11   3    8.00    2.90
  -7 -11   3   47.20    6.10
   7 -11  -3   61.09    6.00
  -7 -11   3   50.49    6.90
   7  11  -3   61.69    7.40
  -7  11   3   46.00    5.00
  -6 -11   3   57.19    7.00
  -6 -11   3   72.29    6.80
  -6 -11   3   64.59    6.60
   6 -11  -3   63.49    5.60
  -6  11   3   68.29    5.00
   6  11  -3   74.99    7.90
  -5 -11   3   36.00    5.30
  -5 -11   3   30.80    3.90
   5 -11  -3   32.10    4.10
  -5 -11   3   29.80    4.30
  -5 -11   3   32.90    4.50
  -5 -11   3   38.30    6.00
  -5  11   3   38.90    4.40
   5  11  -3   32.20    5.10
  -5  11   3   25.00    3.40
  -4 -11   3    4.80    2.30
  -4 -11   3    0.80    3.20
   4 -11  -3    0.50    1.90
  -4 -11   3    3.70    2.50
  -4 -11   3    3.00    2.20
  -4 -11   3    1.30    2.60
  -4  11   3    5.40    2.00
  -4  11   3    1.00    2.10
  -4  11   3   -0.70    1.70
   4  11  -3    2.90    2.50
   3 -11  -3   21.60    4.80
  -3 -11   3   22.40    3.90
  -3 -11   3   32.50    3.90
  -3 -11   3   27.60    5.50
  -3  11   3   29.60    3.80
   3  11  -3   30.90    4.10
  -3  11   3   25.80    3.30
  -3  11   3   27.90    3.30
  -2 -11   3   24.90    3.70
   2 -11  -3   27.60    3.80
  -2 -11   3   26.20    3.80
  -2 -11   3   20.50    4.70
   2 -11  -3   26.70    4.90
  -2  11   3   27.90    3.30
   2  11  -3   23.70    3.40
  -2  11   3   21.20    3.10
  -2  11   3   30.90    3.80
  -1 -11   3    4.00    3.00
   1 -11  -3   -1.20    2.50
  -1 -11   3   -1.40    1.80
  -1 -11   3    0.60    2.20
   1 -11  -3   -1.10    2.00
   1  11  -3    0.00    1.60
  -1  11   3   -1.10    2.00
   1  11  -3   -0.30    1.80
  -1  11   3   -2.40    1.90
  -1  11   3    2.00    2.00
   0 -11  -3  146.29    8.60
   0 -11   3  145.99    7.60
   0 -11  -3  140.99    7.60
   0 -11   3  142.49    9.20
   0 -11   3  148.09    6.10
   0  11  -3  144.99    6.00
   0  11   3  155.48    7.70
   0  11  -3  143.19    5.90
   0  11   3  146.39    7.30
   1 -11   3   58.49    5.70
  -1 -11  -3   60.49    5.90
   1 -11   3   52.89    7.00
  -1 -11  -3   58.89    6.60
   1  11   3   61.49    5.80
   1  11   3   62.09    6.10
   2 -11   3   17.10    3.90
   2 -11   3   12.80    4.10
  -2 -11  -3   17.10    3.10
  -2 -11  -3   15.80    2.90
  -2 -11  -3   13.60    3.60
   2  11   3   12.70    3.20
   2  11   3   15.50    3.90
  -3 -11  -3    2.80    3.00
  -3 -11  -3    1.10    2.60
   3 -11   3   -0.30    3.00
  -3 -11  -3    2.90    2.30
  -3 -11  -3    3.80    2.50
   3 -11   3    2.10    3.00
   3  11   3   -0.60    2.30
   3  11   3    1.30    2.60
  -4 -11  -3   44.10    6.10
  -4 -11  -3   41.00    5.10
  -4 -11  -3   48.50    5.60
   4 -11   3   61.79    6.90
  -4 -11  -3   45.00    6.00
   4  11   3   49.50    6.10
   4  11   3   52.79    6.70
   5 -11   3    5.20    3.40
  -5 -11  -3    8.10    3.40
  -5 -11  -3    8.50    4.00
  -5 -11  -3    5.00    3.50
  -5 -11  -3    7.50    3.20
   5  11   3    8.10    3.40
   5  11   3    2.90    3.00
  -6 -11  -3   15.10    4.60
  -6 -11  -3   30.10    5.40
   6  11   3   28.20    5.50
  -7 -11  -3    2.90    3.70
   7 -11   3    4.70    2.40
  -7  11  -3    6.80    4.00
   7  11   3    5.70    3.70
  -8 -11  -3    5.40    4.80
   8 -11   3   14.70    3.30
  -8  11  -3    3.90    2.50
  -8  11  -3   12.70    4.80
   9 -11   3    7.80    3.20
  -9 -11  -3    3.10    5.00
  -9  11  -3    7.60    4.60
  -9  11  -3    3.40    2.70
  10 -11   3   26.00    5.20
 -10 -11  -3   28.00    7.80
 -10  11  -3   17.20    5.90
 -10  11  -3   18.70    4.30
  11 -11   3    7.00    4.80
 -11 -11  -3    5.30    5.60
 -11  11  -3    6.00    3.70
 -11 -12   3   11.60    6.10
  11 -12  -3   10.70    5.10
 -11  12   3    9.40    4.10
 -10 -12   3   -1.30    4.60
  10 -12  -3    0.20    3.60
 -10  12   3   -1.40    3.00
   9 -12  -3    8.40    4.00
  -9 -12   3    7.30    4.80
  -9  12   3    5.70    3.20
   9  12  -3    2.70    4.10
  -8 -12   3   -1.70    3.50
   8 -12  -3    0.10    2.80
  -8 -12   3    0.50    3.80
   8  12  -3   -3.90    3.10
  -8  12   3    0.40    2.50
  -7 -12   3   -1.20    3.20
   7 -12  -3   -0.90    2.60
  -7 -12   3   -1.20    3.10
  -7  12   3    1.80    2.40
   7  12  -3   -1.20    3.10
  -6 -12   3   25.90    4.40
   6 -12  -3   36.40    4.40
  -6 -12   3   23.60    5.10
  -6 -12   3   35.40    5.10
  -6 -12   3   27.90    6.10
  -6  12   3   39.90    4.70
  -6  12   3   28.90    3.80
   6  12  -3   31.40    5.40
  -5 -12   3    6.70    3.10
  -5 -12   3    2.90    2.60
   5 -12  -3    4.70    2.40
  -5 -12   3    0.10    3.00
  -5 -12   3    3.90    3.70
   5  12  -3    4.20    3.20
  -5  12   3    2.60    2.60
  -5  12   3    6.80    2.20
  -4 -12   3   42.60    4.60
  -4 -12   3   43.90    4.20
  -4 -12   3   35.00    5.10
  -4 -12   3   38.40    4.00
  -4 -12   3   39.60    6.40
   4  12  -3   38.20    5.10
  -4  12   3   38.40    4.00
  -4  12   3   38.00    4.50
  -3 -12   3   67.69    5.70
   3 -12  -3   53.79    7.10
  -3 -12   3   71.09    8.20
  -3 -12   3   56.59    5.70
  -3  12   3   61.99    4.60
  -3  12   3   62.19    5.50
   3  12  -3   55.99    5.60
  -2 -12   3   14.90    3.30
  -2 -12   3   17.70    4.70
   2 -12  -3   11.80    4.00
  -2 -12   3   16.30    3.30
   2 -12  -3   13.50    3.30
   2  12  -3    9.90    2.80
  -2  12   3   15.40    3.40
  -2  12   3    8.70    2.50
  -1 -12   3    8.70    2.80
   1 -12  -3    6.10    3.30
  -1 -12   3    8.70    3.90
   1 -12  -3    4.40    2.70
  -1 -12   3    5.80    2.40
   1  12  -3    4.30    2.20
  -1  12   3    4.70    2.30
  -1  12   3    9.00    3.00
   1  12  -3    2.20    2.00
   0 -12  -3   29.40    5.30
   0 -12   3   23.50    5.20
   0 -12  -3   18.90    3.80
   0 -12   3   24.30    4.10
   0 -12   3   21.60    2.80
   0  12  -3   22.90    2.90
   0  12  -3   24.60    2.90
   0  12   3   17.90    3.50
   0  12   3   27.60    4.40
   1 -12   3   15.00    4.70
  -1 -12  -3   18.10    3.80
  -1 -12  -3   14.10    4.00
   1 -12   3   20.10    4.00
   1  12   3   19.70    3.80
   1  12   3   18.40    4.00
  -2 -12  -3   20.70    4.00
  -2 -12  -3   22.60    4.90
   2 -12   3   24.50    5.50
  -2 -12  -3   19.60    3.30
  -2 -12  -3   24.30    3.30
   2 -12   3   29.00    5.00
   2  12   3   26.50    4.50
   2  12   3   26.70    4.70
   3 -12   3   38.30    6.20
  -3 -12  -3   43.10    4.80
  -3 -12  -3   38.40    6.00
  -3 -12  -3   39.40    4.80
   3 -12   3   39.80    5.90
  -3 -12  -3   42.00    5.70
   3  12   3   41.30    5.70
   3  12   3   46.40    5.60
   4 -12   3    5.10    3.90
  -4 -12  -3    7.40    3.60
  -4 -12  -3    8.50    3.70
  -4 -12  -3    8.70    3.30
  -4 -12  -3    8.60    3.30
   4  12   3    5.90    3.50
   4  12   3    9.00    4.00
  -5 -12  -3    5.00    3.30
  -5 -12  -3    3.30    3.40
  -5 -12  -3    1.30    3.30
  -5 -12  -3   -4.90    2.70
   5 -12   3   -0.70    3.00
   5  12   3    5.30    3.70
   5  12   3    0.50    2.90
  -6 -12  -3    1.20    3.40
  -6 -12  -3   -0.90    3.10
  -6 -12  -3    0.00    3.20
   6  12   3    1.40    3.30
  -7 -12  -3   16.10    5.30
  -7  12  -3    9.60    4.50
   7  12   3   10.80    4.80
  -8 -12  -3   -3.20    4.10
  -8  12  -3    2.60    4.20
  -8  12  -3    1.30    2.10
  -9 -12  -3   -4.50    4.40
  -9  12  -3   -4.00    4.10
  -9  12  -3    1.80    2.50
 -10 -12  -3    3.20    4.70
 -10  12  -3    1.50    2.80
  10 -13  -3   -1.60    3.90
 -10 -13   3    7.70    5.80
 -10  13   3    4.30    3.50
   9 -13  -3    5.30    3.30
  -9 -13   3   -3.50    4.10
  -9  13   3    0.70    2.90
   9  13  -3    0.30    4.30
  -8 -13   3    2.90    3.90
  -8 -13   3    8.20    4.80
   8 -13  -3    7.40    3.30
   8  13  -3    2.50    3.90
  -8  13   3    7.10    3.20
  -7 -13   3   28.50    5.40
   7 -13  -3   35.30    4.80
  -7 -13   3   25.30    5.20
  -7 -13   3   24.30    6.00
  -7 -13   3   32.00    6.30
  -7  13   3   36.90    5.30
  -7  13   3   25.60    3.90
   7  13  -3   27.70    6.10
  -6 -13   3   12.30    5.00
  -6 -13   3    6.40    3.80
  -6 -13   3    7.00    3.70
   6 -13  -3   15.70    3.30
  -6 -13   3    8.30    3.40
  -6  13   3   10.40    3.30
  -6  13   3    9.00    2.70
   6  13  -3    7.80    3.80
  -5 -13   3   -1.40    2.30
  -5 -13   3   -6.00    2.40
  -5 -13   3    2.20    4.00
  -5 -13   3    1.40    2.80
  -5  13   3    0.70    2.70
  -5  13   3    0.60    2.00
   5  13  -3   -1.90    2.60
  -4 -13   3    7.00    4.50
  -4 -13   3   -2.30    2.50
  -4  13   3   -0.50    2.50
   4  13  -3   -1.00    2.60
  -4  13   3    1.40    2.00
   3 -13  -3  112.79   10.20
  -3 -13   3  102.69    7.00
  -3 -13   3  109.89   10.70
  -3 -13   3  113.19    6.90
   3 -13  -3   99.29    6.40
  -3  13   3  116.69    6.60
  -3  13   3  101.39    6.00
   3  13  -3  103.89    6.90
  -2 -13   3   92.39    6.40
  -2 -13   3  106.49    6.60
  -2 -13   3  109.99   10.70
   2 -13  -3  115.89    6.80
   2 -13  -3  108.09    9.90
  -2  13   3   95.09    6.00
  -2  13   3  118.99    6.70
   2  13  -3  105.09    6.50
  -1 -13   3    0.50    2.10
  -1 -13   3    4.60    3.70
  -1 -13   3    2.40    2.70
   1 -13  -3   -1.90    2.90
   1 -13  -3    1.00    2.40
  -1  13   3    6.70    2.50
   1  13  -3   -1.80    1.90
  -1  13   3    0.80    2.20
   0 -13   3   86.19    7.40
   0 -13   3   70.09    8.60
   0 -13  -3   72.19    7.90
   0 -13  -3   84.89    6.20
   0 -13   3   74.59    4.60
   0  13  -3   76.19    4.50
   0  13   3   76.69    6.80
   0  13  -3   61.29    4.40
   0  13   3   62.79    5.90
   1 -13   3   25.50    5.50
  -1 -13  -3   36.40    5.90
   1 -13   3   39.90    5.60
  -1 -13  -3   33.90    5.00
   1  13   3   29.80    4.40
   1  13   3   32.30    4.90
   2 -13   3   39.50    6.50
  -2 -13  -3   41.00    6.40
   2 -13   3   28.80    5.10
  -2 -13  -3   36.40    5.40
   2  13   3   43.00    5.70
   2  13   3   37.80    5.10
  -3 -13  -3    0.70    3.10
  -3 -13  -3   -0.20    2.30
   3 -13   3   -0.30    3.60
   3 -13   3    2.10    3.50
  -3 -13  -3    1.30    3.10
  -3 -13  -3   -1.00    2.70
   3  13   3   -1.70    2.70
   3  13   3    1.60    2.80
   4 -13   3   17.60    4.90
  -4 -13  -3   26.50    4.20
  -4 -13  -3   18.00    4.10
  -4 -13  -3   26.00    5.50
  -4 -13  -3   19.60    4.70
   4  13   3   22.20    4.90
   4  13   3   20.80    4.90
  -5 -13  -3    7.30    4.00
  -5 -13  -3   12.70    3.80
  -5 -13  -3    8.00    4.30
   5 -13   3   14.90    5.10
  -5 -13  -3    8.00    3.60
   5  13   3   11.60    4.20
   5  13   3   14.40    4.40
  -6 -13  -3    7.30    4.20
  -6 -13  -3    5.70    4.30
  -6 -13  -3    2.90    3.60
   6  13   3    6.30    4.20
  -7 -13  -3   -1.50    3.20
  -7 -13  -3    0.20    4.00
   7  13   3    4.60    4.10
  -8 -13  -3   35.20    7.10
  -9 -13  -3    0.00    4.60
  -9  13  -3    8.70    3.10
 -10 -13  -3   13.30    6.30
 -10  13  -3   10.60    3.60
 -10 -14   3   -5.40    4.50
 -10  14   3    0.40    3.60
  -9 -14   3    4.90    4.80
  -9  14   3    7.50    3.50
   9  14  -3    8.20    5.40
  -8 -14   3   25.20    5.60
  -8 -14   3   21.10    6.40
  -8 -14   3   24.10    6.10
  -8  14   3   20.90    3.90
   8  14  -3   43.30    7.30
   7 -14  -3    8.80    3.50
  -7 -14   3    8.90    4.60
  -7 -14   3    5.80    3.90
  -7 -14   3    7.30    4.20
  -7 -14   3    8.60    4.70
   7  14  -3    7.80    4.40
  -7  14   3    5.40    2.80
  -6 -14   3    1.80    3.90
   6 -14  -3    0.20    2.70
  -6 -14   3   -0.80    2.90
  -6 -14   3    2.40    3.90
  -6 -14   3    0.30    3.10
   6  14  -3    4.00    3.60
  -6  14   3    5.90    2.40
  -5 -14   3   10.90    5.00
  -5 -14   3   16.10    4.50
   5  14  -3   10.60    4.00
  -5  14   3    9.20    2.90
  -5  14   3   17.30    3.90
   4 -14  -3   -0.40    2.40
  -4 -14   3    0.20    3.80
  -4 -14   3   -3.60    2.60
  -4  14   3    2.40    3.00
   4  14  -3    0.10    2.70
  -4  14   3   -2.60    1.90
   3 -14  -3   -0.70    2.70
   3 -14  -3    0.30    3.50
  -3 -14   3   -3.50    3.30
  -3 -14   3   -1.90    2.70
  -3  14   3   -2.10    2.00
  -3  14   3    1.00    2.70
   3  14  -3    3.50    2.70
  -2 -14   3   65.39    6.00
   2 -14  -3   68.89    6.20
  -2 -14   3   70.69    9.00
   2 -14  -3   64.59    8.20
   2  14  -3   64.59    5.90
  -2  14   3   71.59    6.50
  -2  14   3   64.89    5.70
  -1 -14   3   47.70    5.70
   1 -14  -3   34.40    6.50
   1 -14  -3   43.30    5.40
  -1 -14   3   44.90    4.70
  -1 -14   3   34.50    6.50
   1  14  -3   29.70    3.90
  -1  14   3   48.30    5.60
  -1  14   3   36.70    4.70
   0 -14  -3   37.50    6.20
   0 -14  -3   35.50    5.00
   0 -14   3   36.10    3.90
   0 -14   3   36.60    5.40
   0 -14   3   39.40    7.00
   0  14   3   49.60    6.00
   0  14  -3   38.90    3.90
   0  14   3   28.30    4.30
  -1 -14  -3    2.50    3.40
   1 -14   3    2.00    4.00
  -1 -14  -3   -1.00    3.30
   1 -14   3    8.00    3.50
   1  14   3    1.00    2.90
   1  14   3    3.10    3.20
   2 -14   3   18.50    4.60
  -2 -14  -3   20.30    5.10
   2 -14   3    6.40    4.60
  -2 -14  -3   17.90    4.50
   2  14   3    9.40    3.60
   2  14   3   14.20    4.30
  -3 -14  -3   12.20    3.40
  -3 -14  -3    8.60    2.90
   3 -14   3   11.80    5.10
   3 -14   3   10.50    4.30
  -3 -14  -3    9.30    4.60
  -3 -14  -3    7.00    3.80
   3  14   3    6.70    3.50
   3  14   3    6.90    3.80
  -4 -14  -3   76.79    9.20
   4 -14   3   75.79    8.50
  -4 -14  -3   78.59    6.70
  -4 -14  -3   65.39    6.40
  -4 -14  -3   52.19    7.00
   4  14   3   58.49    7.70
   4  14   3   51.39    6.80
  -5 -14  -3    0.10    3.50
  -5 -14  -3    3.60    4.10
  -5 -14  -3    1.70    3.10
  -5 -14  -3    6.20    4.10
   5  14   3   -1.00    3.20
   5  14   3   -1.00    3.20
  -6 -14  -3   93.59   10.20
  -6 -14  -3   69.79    8.80
  -6 -14  -3   93.89    8.90
   6  14   3   84.69    9.40
  -7 -14  -3   13.10    5.50
  -7 -14  -3   13.50    5.40
   7  14   3   18.80    6.30
  -8 -14  -3    3.80    5.10
  -8 -14  -3    2.30    4.60
  -9 -14  -3   18.60    6.50
  -9 -15   3    7.40    5.10
  -9 -15   3    5.50    5.10
  -9 -15   3    3.10    5.20
  -9  15   3    2.20    3.00
   9  15  -3    1.10    4.80
  -8 -15   3   -1.40    4.50
  -8 -15   3   16.10    5.10
  -8 -15   3   -0.40    4.20
   8  15  -3    6.90    5.00
  -8  15   3    2.10    3.00
  -7 -15   3    8.30    4.70
  -7 -15   3   10.30    3.90
  -7 -15   3    1.80    4.40
  -7 -15   3    9.70    4.20
  -7  15   3    1.80    2.50
   7  15  -3   13.50    5.30
  -6 -15   3   -1.40    3.60
  -6 -15   3    2.00    3.00
  -6 -15   3    0.70    3.30
  -6 -15   3    0.00    4.20
  -6  15   3   -0.40    2.40
   6  15  -3    1.90    3.70
  -5 -15   3   -2.40    3.10
  -5 -15   3   -3.10    3.80
   5  15  -3   -0.90    3.20
  -5  15   3   -1.50    2.30
  -4 -15   3   16.90    4.40
  -4 -15   3   29.20    7.10
  -4  15   3   17.50    3.40
   4  15  -3   25.30    4.60
  -3 -15   3   -0.30    3.00
  -3 -15   3    5.80    4.60
   3 -15  -3    3.30    3.30
   3 -15  -3    9.00    4.90
  -3  15   3    4.80    2.60
  -3  15   3    5.80    3.40
   3  15  -3    2.10    2.70
   2 -15  -3   37.80    4.80
   2 -15  -3   14.70    5.00
  -2 -15   3   16.50    5.50
  -2 -15   3   25.60    4.30
  -2  15   3   35.60    5.00
  -2  15   3   25.00    3.90
   2  15  -3   23.40    4.10
   1 -15  -3   -2.60    3.00
   1 -15  -3    2.90    4.00
  -1 -15   3    1.20    3.90
  -1 -15   3   -4.80    2.30
   1  15  -3    0.20    2.20
  -1  15   3    3.50    2.50
  -1  15   3   -3.90    2.90
   0 -15  -3    6.60    4.50
   0 -15   3    8.80    5.00
   0 -15   3   12.60    2.90
   0 -15  -3    7.70    3.60
   0 -15   3   12.90    4.30
   0  15   3    7.90    3.20
   0  15   3   11.60    4.00
   0  15  -3   14.50    2.90
  -1 -15  -3   19.60    5.70
   1 -15   3   20.10    6.20
   1 -15   3   27.50    5.50
  -1 -15  -3   25.90    4.90
   1  15   3   20.60    4.20
   1  15   3   18.90    4.90
  -2 -15  -3    8.60    4.20
   2 -15   3    9.20    5.00
  -2 -15  -3    9.30    5.20
   2 -15   3    9.70    4.50
   2  15   3    7.90    4.00
   2  15   3    5.00    3.40
   3 -15   3   19.80    5.40
  -3 -15  -3   19.70    4.90
  -3 -15  -3   16.00    5.30
   3 -15   3   25.40    6.80
   3  15   3   23.70    4.90
   3  15   3   19.80    5.20
   4 -15   3   29.30    6.60
  -4 -15  -3   22.50    6.10
  -4 -15  -3   22.20    4.10
  -4 -15  -3   30.60    4.80
  -4 -15  -3   20.30    5.60
   4  15   3   12.30    4.20
   4  15   3   28.60    5.60
  -5 -15  -3    1.80    4.10
  -5 -15  -3   12.30    4.70
  -5 -15  -3    2.10    4.00
  -5 -15  -3    8.10    3.70
   5  15   3    1.40    3.90
   5  15   3    5.00    3.90
  -6 -15  -3   -3.00    3.60
  -6 -15  -3   -2.30    3.30
  -6 -15  -3   -1.00    4.20
   6  15   3   -2.90    4.00
  -7 -15  -3    9.20    5.30
  -7 -15  -3    4.70    4.70
  -7 -15  -3    6.60    5.00
   7  15   3    2.30    4.10
  -8 -15  -3    4.60    5.20
  -8 -15  -3    2.40    4.90
  -8 -16   3   19.40    5.20
  -8 -16   3   14.90    5.30
  -8 -16   3   17.40    6.00
  -8 -16   3   27.40    7.30
   8  16  -3   24.00    6.50
  -8  16   3   16.00    3.90
  -7 -16   3    1.30    3.80
  -7 -16   3    1.90    3.80
  -7 -16   3    6.30    3.70
  -7 -16   3    2.80    5.20
   7  16  -3    2.20    4.20
  -7  16   3    5.20    2.90
  -6 -16   3   -1.90    3.40
  -6 -16   3   -0.30    4.80
  -6  16   3   -0.60    2.40
   6  16  -3   -0.30    3.60
  -5 -16   3   49.99    7.10
  -5 -16   3   54.79    9.00
   5  16  -3   40.90    6.30
  -5  16   3   53.59    5.10
  -4 -16   3  139.69    9.20
  -4 -16   3  122.59   12.90
  -4  16   3  126.99    7.10
   4  16  -3  124.49    8.70
   3 -16  -3    3.70    4.70
  -3 -16   3   -1.80    3.00
   3 -16  -3    2.70    3.30
  -3 -16   3    1.70    4.50
  -3  16   3    1.70    2.50
   3  16  -3    5.50    3.10
  -2 -16   3   15.20    3.90
   2 -16  -3   32.60    7.20
   2 -16  -3   23.80    4.50
  -2 -16   3   19.40    5.80
  -2  16   3   28.40    4.30
  -2  16   3   35.40    5.40
   2  16  -3   23.80    4.10
  -1 -16   3   77.29   10.30
   1 -16  -3  107.29    7.40
   1 -16  -3   90.69   10.60
  -1 -16   3   92.89    6.50
  -1  16   3   92.49    6.70
  -1  16   3  102.79    8.60
   1  16  -3   86.59    6.20
   0 -16  -3   48.50    6.20
   0 -16   3   50.49    8.30
   0 -16  -3   52.39    8.60
   0 -16   3   56.09    5.30
   0  16  -3   45.20    4.50
   0  16   3   55.79    6.80
   0  16   3   50.69    6.00
   1 -16   3    5.50    5.00
  -1 -16  -3    3.60    4.50
   1 -16   3    5.20    4.10
  -1 -16  -3    4.70    3.60
   1  16   3    5.00    3.20
   1  16   3    8.80    4.30
  -2 -16  -3    8.00    4.60
   2 -16   3   20.10    5.50
  -2 -16  -3   16.10    4.80
   2 -16   3   11.70    5.40
   2  16   3   13.60    4.70
   2  16   3   13.20    4.10
   3 -16   3   11.40    5.00
  -3 -16  -3   20.80    6.00
  -3 -16  -3   10.00    4.30
   3 -16   3    7.30    5.40
   3  16   3    9.70    4.10
  -4 -16  -3   34.00    6.80
  -4 -16  -3   20.90    6.20
   4  16   3   32.10    6.20
   4  16   3   28.00    6.50
  -5 -16  -3    9.60    4.40
  -5 -16  -3    8.70    3.60
  -5 -16  -3    5.70    5.30
  -5 -16  -3   10.30    4.20
   5  16   3    8.80    4.70
  -6 -16  -3  117.39    9.80
  -6 -16  -3  102.59   10.50
  -6 -16  -3   84.69    8.00
  -6 -16  -3   67.49    9.50
   6  16   3  103.59   11.00
  -7 -16  -3   40.00    8.00
  -7 -16  -3   31.80    6.80
  -7 -16  -3   50.09    7.40
   7  16   3   57.19    9.10
  -7 -17   3   -3.70    3.90
  -7 -17   3    2.20    5.20
  -7  17   3    1.30    2.70
   7  17  -3    3.00    4.50
  -6 -17   3   -1.40    3.70
  -6 -17   3    5.30    5.30
   6  17  -3   -5.10    3.30
  -5 -17   3    6.90    5.60
  -5 -17   3    9.80    4.90
  -5  17   3    2.70    2.60
   5  17  -3    1.00    3.60
  -4 -17   3   10.80    4.30
  -4 -17   3   16.90    6.90
   4  17  -3   10.30    4.10
  -4  17   3    9.30    3.30
  -3 -17   3   17.60    6.30
   3 -17  -3   17.30    6.50
  -3 -17   3   19.70    4.70
   3  17  -3   15.70    4.00
  -3  17   3   16.90    3.80
   2 -17  -3    4.70    4.60
  -2 -17   3   -0.80    2.90
   2 -17  -3   -7.20    3.00
  -2 -17   3   -7.60    3.60
  -2  17   3   -0.40    2.80
   2  17  -3    4.40    3.10
  -2  17   3    6.10    4.00
   1 -17  -3   -1.30    3.00
  -1 -17   3    1.10    2.90
   1 -17  -3    2.80    4.70
  -1 -17   3    5.50    5.00
   1  17  -3   -0.50    2.60
  -1  17   3    4.80    3.80
  -1  17   3    2.00    3.10
   0 -17  -3    8.20    5.00
   0 -17   3   12.30    6.10
   0 -17  -3   12.70    4.30
   0  17   3   10.30    4.40
   0  17   3   18.10    4.20
   0  17  -3   14.50    3.10
   1 -17   3   -5.20    3.80
  -1 -17  -3    5.00    5.10
  -1 -17  -3   -4.20    3.30
   1  17   3    5.40    4.00
   1  17   3    1.60    3.40
  -2 -17  -3    0.10    4.20
   2 -17   3    6.50    5.50
  -2 -17  -3   -0.20    3.70
   2 -17   3    0.00    3.70
   2  17   3   -4.40    2.80
   2  17   3   -2.20    3.50
  -3 -17  -3    0.00    4.50
   3 -17   3   -2.40    4.80
  -3 -17  -3   -3.90    3.30
   3  17   3   -0.50    4.20
   3  17   3   -0.70    3.20
  -4 -17  -3   15.00    6.30
  -4 -17  -3   11.60    5.00
   4  17   3   15.80    5.60
   4  17   3   26.60    6.10
  -5 -17  -3    4.10    4.50
  -5 -17  -3   11.10    5.90
   5  17   3    0.90    4.00
  -6 -17  -3    1.20    3.60
  -6 -17  -3    0.60    5.00
  -6 -17  -3    5.60    4.30
  -6 -17  -3    2.70    4.50
   6  17   3    1.00    4.70
  -6 -18   3   -0.80    4.20
  -6 -18   3   -6.20    4.60
   6  18  -3   -2.90    3.60
  -5 -18   3    8.30    4.80
  -5 -18   3    9.40    6.20
  -5  18   3   14.40    3.60
   5  18  -3   10.60    4.40
  -4 -18   3   12.10    4.70
  -4 -18   3   18.50    6.80
   4  18  -3   18.20    4.90
  -4  18   3   27.20    4.00
  -3 -18   3    2.80    3.80
  -3 -18   3    2.50    5.00
   3 -18  -3    2.20    5.20
  -3  18   3    0.20    2.80
   3  18  -3   -1.10    2.80
  -2 -18   3   41.00    5.80
  -2 -18   3   44.50    9.10
   2 -18  -3   41.90    5.60
   2 -18  -3   35.60    7.70
   2  18  -3   32.60    5.20
  -2  18   3   28.80    4.60
   1 -18  -3   16.90    4.50
   1 -18  -3   23.30    7.20
  -1 -18   3    6.30    5.40
   1  18  -3   21.70    4.20
  -1  18   3   16.00    4.10
   0 -18  -3   10.20    4.30
   0 -18   3    8.60    5.70
   0 -18  -3   10.10    5.60
   0  18   3    6.60    4.40
   0  18  -3    7.70    3.00
   0  18   3   13.30    4.10
  -1 -18  -3   21.00    5.30
   1 -18   3   12.00    6.00
  -1 -18  -3   28.20    7.50
   1  18   3   19.60    4.40
   1  18   3   26.70    5.90
   2 -18   3    6.90    5.80
  -2 -18  -3   21.50    6.90
  -2 -18  -3   11.50    4.90
   2  18   3   13.50    4.50
   2  18   3   22.60    5.90
  -3 -18  -3   14.60    6.50
   3 -18   3   13.60    6.40
  -3 -18  -3   10.00    5.30
   3  18   3    8.80    4.40
   3  18   3   20.40    5.90
  -4 -18  -3   -0.50    4.70
  -4 -18  -3    4.50    4.70
   4  18   3    2.00    4.20
  -5 -18  -3   17.60    5.80
  -5 -18  -3   12.10    6.30
   5  18   3    1.50    4.30
  -4 -19   3    5.80    5.90
  -4 -19   3    5.60    4.40
   4  19  -3    5.90    3.80
  -4  19   3    9.50    3.30
  -3 -19   3   19.80    7.20
   3 -19  -3   30.60    8.10
  -3 -19   3   29.30    6.10
   3  19  -3   26.10    5.00
  -3  19   3   26.00    4.40
  -2 -19   3   15.80    7.30
   2 -19  -3   25.00    7.00
  -2 -19   3   28.40    5.20
   2  19  -3   16.70    4.30
  -2  19   3   27.70    4.70
  -1 -19   3    1.00    4.80
   1 -19  -3    1.20    3.50
   1 -19  -3    5.60    5.80
   1  19  -3    1.70    2.80
  -1  19   3    0.10    3.10
   0 -19   3    4.20    5.50
   0 -19  -3   -2.10    4.50
   0 -19  -3   -0.30    4.00
   0  19   3   -1.80    3.10
   0  19   3    0.60    4.60
   0  19  -3   -0.60    2.60
  -1 -19  -3    8.60    5.90
  -1 -19  -3    7.60    4.70
   1 -19   3    4.20    5.70
   1  19   3    8.30    4.00
   1  19   3   12.90    5.30
  -2 -19  -3    2.70    4.30
   2 -19   3    0.00    5.10
  -2 -19  -3   10.50    6.10
   2  19   3    8.90    4.00
   2  19   3    9.90    5.40
  -3 -19  -3    0.30    5.00
   3 -19   3    1.10    5.80
  -3 -19  -3    5.60    5.00
   3  19   3    0.90    3.40
   3  19   3    5.60    5.00
  -4 -19  -3   27.70    7.50
  -4 -19  -3   19.60    6.40
   4  19   3   18.00    5.60
  -1 -20   3   -4.80    4.90
   1 -20  -3   -4.20    5.20
   1  20  -3    1.40    2.90
  -1  20   3   -0.80    3.20
   0 -20  -3   -2.80    5.00
   0 -20  -3    2.50    4.20
   0 -20   3    5.60    5.90
   0  20   3   -2.60    2.80
   0  20  -3    2.10    2.90
  13   0  -4   37.90    8.40
  12   0  -4    2.40    4.00
 -12   0   4   -0.90    3.70
 -11   0   4    6.00    4.00
  11   0  -4    4.80    4.10
 -10   0   4   35.40    6.00
 -10   0   4   37.90    6.10
  10   0  -4   42.10    6.90
   9   0  -4  170.08   10.10
   9   0  -4  147.19    9.20
  -9   0   4  163.18    9.30
  -9   0   4  184.48   10.10
   8   0  -4   10.70    3.60
  -8   0   4   15.90    3.80
  -8   0   4   17.90    3.70
   8   0  -4   21.50    4.00
  -7   0   4  130.29    7.20
   7   0  -4  130.89    7.30
   7   0  -4  139.59    8.00
   7   0  -4  130.19    7.20
   7   0  -4  140.39    7.70
  -7   0   4  132.69    7.60
  -6   0   4 1241.28   36.50
  -6   0   4 1241.58   37.20
   6   0  -4 1258.07   37.60
   6   0  -4 1237.68   37.60
   6   0  -4 1236.58   36.70
   6   0  -4 1213.98   37.60
   5   0  -4   -1.10    1.30
   5   0  -4    0.90    1.50
   5   0  -4    0.70    1.40
   5   0  -4   -0.50    1.70
  -5   0   4    5.80    2.20
  -5   0   4    1.90    1.80
   4   0  -4  128.49    6.30
  -4   0   4  134.39    6.10
   4   0  -4  126.99    6.30
   4   0  -4  132.29    6.10
   4   0  -4  123.69    6.10
  -4   0   4  132.49    6.30
   3   0  -4  231.18    8.80
   3   0  -4  236.28    8.60
  -3   0   4  236.58    8.80
  -3   0   4  231.28    8.50
  -2   0   4  471.85   14.50
   2   0  -4  479.25   14.90
   2   0  -4  462.15   14.60
  -2   0   4  479.95   14.90
  -1   0   4   63.29    3.50
   1   0  -4   66.99    3.60
  -1   0   4   71.99    3.80
  -1   0   4   64.49    3.70
   0   0   4   36.80    2.80
   0   0   4   37.70    2.80
   0   0   4   47.70    2.90
   0   0  -4   42.50    2.90
   0   0   4   39.60    2.80
   0   0   4   45.00    3.10
   0   0  -4   41.40    2.90
   1   0   4   17.00    2.40
   1   0   4   12.90    2.00
  -1   0  -4   12.40    2.20
   1   0   4   11.90    2.00
   1   0   4    8.50    1.90
   1   0   4   10.30    1.90
  -1   0  -4   13.10    2.00
   2   0   4  198.78    7.70
   2   0   4  202.68    7.90
  -2   0  -4  203.18    7.70
   2   0   4  213.78    7.40
   2   0   4  205.88    7.70
  -2   0  -4  205.68    7.60
   2   0   4  208.68    7.80
   3   0   4   85.89    4.90
   3   0   4   94.09    4.90
  -3   0  -4   95.79    4.90
   3   0   4   89.19    4.80
   3   0   4  100.39    4.90
  -3   0  -4   96.59    4.90
   3   0   4   85.29    4.50
   4   0   4   87.29    5.40
  -4   0  -4  103.59    5.40
   4   0   4  105.39    5.60
   4   0   4  105.39    5.50
  -4   0  -4   94.49    5.70
   4   0   4  110.89    5.30
  -4   0  -4  108.39    5.50
   4   0   4   93.99    5.20
  -5   0  -4  641.24   20.90
   5   0   4  651.83   21.10
   5   0   4  652.33   21.00
  -5   0  -4  650.53   21.70
   5   0   4  637.44   20.20
  -5   0  -4  659.33   20.70
   5   0   4  642.34   21.40
  -6   0  -4  290.97   11.40
   6   0   4  278.77   11.30
  -6   0  -4  277.57   11.40
  -6   0  -4  281.87   12.20
   6   0   4  285.87   11.50
   6   0   4  278.47   11.90
   7   0   4    9.70    3.30
   7   0   4   10.50    2.90
  -7   0  -4    7.80    2.90
  -7   0  -4    8.40    2.60
   7   0   4    6.40    2.50
  -7   0  -4    8.80    2.80
   8   0   4  102.89    6.90
   8   0   4   95.49    7.20
  -8   0  -4   87.69    6.70
  -8   0  -4   85.99    8.60
  -8   0  -4  104.29    7.10
   8   0   4   86.09    6.50
   9   0   4   68.49    6.90
  -9   0  -4   63.49    7.50
   9   0   4   65.89    8.30
  -9   0  -4   65.89    8.10
 -10   0  -4   71.89    8.30
  10   0   4   73.89    7.70
 -10   0  -4   64.09    8.20
  10   0   4   67.69    8.70
  11   0   4   36.00    6.00
 -11   0  -4   40.10    6.90
  11   0   4   21.20    5.80
 -11   0  -4   28.70    6.30
 -12   0  -4   32.90    6.90
  12   0   4   19.50    6.00
 -12   0  -4   21.20    5.70
  12   0   4   32.40    6.50
 -13   0  -4   49.10    8.60
  13   0   4   44.00    8.40
 -13   0  -4   72.99   10.60
  14  -1  -4    0.90    5.10
  14   1  -4    2.20    5.30
  13  -1  -4   -0.40    4.30
 -13   1   4    2.00    4.00
  13   1  -4   -3.20    3.80
  12  -1  -4    0.10    3.70
 -12   1   4   -6.00    3.50
  12   1  -4   -2.10    3.50
 -11  -1   4    3.20    3.40
 -11  -1   4    3.50    4.00
  11  -1  -4    1.40    3.50
 -11   1   4    3.20    3.60
  11   1  -4   -3.30    3.20
 -10  -1   4  229.48   12.30
  10  -1  -4  226.48   11.50
 -10  -1   4  244.78   12.10
  10  -1  -4  217.58   12.30
 -10   1   4  213.28   11.50
  10   1  -4  224.98   12.60
   9  -1  -4    1.00    2.50
  -9  -1   4    1.60    2.60
   9  -1  -4    3.00    3.10
  -9  -1   4    3.50    3.60
   9   1  -4   -1.40    2.80
  -9   1   4   -1.40    2.40
  -9   1   4    5.30    3.50
  -8  -1   4   21.00    4.10
  -8  -1   4   17.50    3.60
   8  -1  -4   26.20    4.40
   8  -1  -4   23.10    4.30
   8  -1  -4   17.70    3.60
   8   1  -4   22.90    4.30
   8   1  -4   21.20    3.70
  -8   1   4   19.30    4.10
  -8   1   4   23.10    4.00
   7  -1  -4  125.59    7.50
  -7  -1   4  136.99    7.80
  -7  -1   4  128.09    7.20
   7  -1  -4  141.89    7.30
   7  -1  -4  119.49    7.20
   7   1  -4  125.69    7.40
  -7   1   4  129.19    7.10
   7   1  -4  126.19    7.10
   7   1  -4  120.99    7.20
   7   1  -4  118.39    7.60
  -7   1   4  126.79    7.40
   6  -1  -4   61.69    5.40
   6  -1  -4   75.49    6.70
  -6  -1   4   65.89    5.90
   6  -1  -4   76.79    6.30
  -6  -1   4   77.59    6.90
  -6   1   4   60.69    5.60
  -6   1   4   64.39    4.80
   6   1  -4   65.89    6.00
   6   1  -4   77.19    6.60
   6   1  -4   71.99    5.00
   6   1  -4   68.89    5.20
   5  -1  -4   57.39    4.30
   5  -1  -4   60.39    4.20
  -5  -1   4   62.99    4.50
   5  -1  -4   67.49    4.60
   5  -1  -4   68.99    6.00
  -5  -1   4   69.69    4.90
  -5   1   4   59.09    4.30
   5   1  -4   57.79    4.40
  -5   1   4   63.99    4.60
   5   1  -4   61.39    4.60
   5   1  -4   64.99    5.80
   5   1  -4   57.19    4.50
   4  -1  -4   12.90    2.50
   4  -1  -4   11.00    2.30
   4  -1  -4   11.60    2.10
   4  -1  -4   13.20    2.50
  -4  -1   4   11.50    2.60
  -4  -1   4    8.50    2.00
  -4   1   4   11.40    2.40
   4   1  -4    9.70    2.10
   4   1  -4   12.00    2.40
   4   1  -4   12.30    2.40
  -4   1   4    6.50    2.10
  -3  -1   4   10.10    2.00
  -3  -1   4   10.40    2.10
   3  -1  -4   13.00    2.10
   3  -1  -4   11.30    2.10
   3  -1  -4   15.20    2.40
   3  -1  -4   10.90    2.10
   3   1  -4    8.90    1.90
  -3   1   4    6.10    1.80
   3   1  -4   13.70    2.50
  -3   1   4   11.00    2.20
  -2  -1   4   58.09    3.60
   2  -1  -4   56.99    3.60
   2  -1  -4   60.19    3.50
  -2  -1   4   53.89    3.50
  -2  -1   4   60.49    3.70
   2  -1  -4   63.09    3.70
   2   1  -4   58.49    3.50
  -2   1   4   63.99    3.80
   2   1  -4   62.59    3.70
  -2   1   4   52.19    3.40
  -1  -1   4    4.50    1.50
  -1  -1   4    6.90    1.70
   1  -1  -4    5.80    1.70
  -1  -1   4    6.80    1.60
  -1  -1   4    4.80    1.50
  -1  -1   4    2.00    1.30
   1  -1  -4    4.70    1.50
  -1   1   4    2.30    1.30
   1   1  -4    5.00    1.50
  -1   1   4    2.60    1.50
  -1   1   4    4.50    1.60
   1   1  -4    5.50    1.50
   0  -1   4  220.78    7.70
   0  -1   4  210.48    7.60
   0  -1   4  219.48    7.60
   0  -1  -4  225.38    7.80
   0  -1  -4  226.88    8.00
   0  -1   4  214.48    7.60
   0  -1   4  217.78    7.60
   0   1  -4  216.68    7.50
   0   1  -4  211.78    7.50
   0   1  -4  215.08    7.60
   0   1   4  213.78    8.00
   0   1   4  209.58    7.70
   0   1   4  225.38    8.00
   0   1   4  222.88    7.20
   1  -1   4   11.60    2.00
   1  -1   4   12.10    2.10
   1  -1   4    9.80    1.80
  -1  -1  -4    8.20    1.70
   1  -1   4    8.90    1.80
  -1  -1  -4   12.30    1.90
   1  -1   4   11.20    1.80
   1   1   4   12.00    2.10
  -1   1  -4   10.90    1.90
  -1   1  -4   11.30    1.80
   1   1   4   12.60    2.20
   1   1   4   14.60    2.30
   1   1   4   11.00    2.10
   1   1   4    9.80    1.70
  -2  -1  -4  100.69    5.00
   2  -1   4  111.19    4.90
   2  -1   4   98.39    4.60
  -2  -1  -4  110.49    5.20
   2  -1   4  106.49    4.80
   2  -1   4   90.09    4.70
   2  -1   4  109.49    5.00
  -2   1  -4  104.79    4.70
  -2   1  -4  101.49    4.70
   2   1   4  109.69    5.30
   2   1   4  112.69    5.30
   2   1   4  106.19    5.10
   2   1   4  118.69    4.60
   2   1   4  104.59    5.00
   2   1   4  109.39    5.30
   3  -1   4   10.80    2.10
   3  -1   4   11.80    2.10
   3  -1   4   10.50    2.20
  -3  -1  -4   12.70    2.50
   3  -1   4    9.90    1.90
  -3  -1  -4    9.70    2.10
   3  -1   4    9.30    1.80
   3  -1   4   11.90    2.00
  -3  -1  -4   11.80    2.50
  -3   1  -4   15.70    2.40
   3   1   4   12.80    2.60
   3   1   4   12.20    2.30
   3   1   4   10.70    2.10
   3   1   4   10.90    2.30
  -3   1  -4    9.20    1.90
   3   1   4   13.80    2.00
   3   1   4    9.40    2.00
   4  -1   4   61.89    5.20
  -4  -1  -4   56.69    4.10
   4  -1   4   49.00    3.60
  -4  -1  -4   65.09    5.20
   4  -1   4   60.39    3.90
   4  -1   4   52.29    3.70
   4  -1   4   63.19    5.20
  -4  -1  -4   60.19    4.40
  -4   1  -4   68.89    5.90
   4   1   4   71.19    5.70
   4   1   4   68.09    4.60
   4   1   4   55.59    4.20
  -4   1  -4   48.50    3.70
  -4   1  -4   55.49    3.80
   4   1   4   52.69    4.10
   4   1   4   55.99    4.10
   4   1   4   51.89    3.60
   4   1   4   46.70    4.30
   5  -1   4   25.40    3.60
  -5  -1  -4   27.80    3.90
  -5  -1  -4   27.70    4.00
   5  -1   4   37.50    4.30
   5  -1   4   28.60    3.40
   5  -1   4   25.00    3.10
  -5  -1  -4   36.70    4.30
  -5   1  -4   34.20    4.00
   5   1   4   31.50    4.40
   5   1   4   27.30    3.80
  -5   1  -4   32.80    4.20
   5   1   4   31.20    3.70
   5   1   4   29.60    3.80
   5   1   4   29.70    3.60
  -5   1  -4   33.00    4.00
  -6  -1  -4    0.30    1.80
   6  -1   4    0.00    1.40
   6  -1   4   -2.60    1.20
  -6  -1  -4    4.40    2.00
  -6  -1  -4   -0.60    1.50
   6  -1   4    0.30    1.80
  -6   1  -4   -0.10    1.60
   6   1   4   -0.30    1.90
  -6   1  -4    1.00    1.80
   6   1   4    0.70    1.80
  -6   1  -4    0.00    1.80
   6   1   4   -0.70    1.40
   7  -1   4   82.49    6.90
   7  -1   4   82.59    5.60
   7  -1   4   86.39    8.10
  -7  -1  -4   79.69    7.60
  -7  -1  -4   87.59    7.40
  -7  -1  -4   70.49    6.20
   7   1   4   82.99    8.10
   7   1   4   73.39    5.70
  -7   1  -4   75.59    7.50
  -7   1  -4   70.89    6.40
  -7   1  -4   85.69    7.10
   7   1   4   57.49    6.00
  -8  -1  -4    0.80    2.70
   8  -1   4    1.50    2.10
  -8  -1  -4    2.20    2.20
   8  -1   4    5.80    2.90
  -8  -1  -4    3.10    2.70
   8  -1   4    4.30    2.40
   8   1   4    8.30    2.80
   8   1   4    1.10    2.90
  -8   1  -4    5.30    3.10
  -8   1  -4    4.50    2.70
  -9  -1  -4   -4.70    2.20
   9  -1   4   -2.40    2.20
   9  -1   4    1.80    2.50
  -9  -1  -4   -1.70    2.20
   9  -1   4    1.30    2.50
   9   1   4   -1.30    2.30
  -9   1  -4    2.60    3.00
   9   1   4    0.60    2.70
  -9   1  -4    1.30    2.80
  10  -1   4   24.60    5.50
  10  -1   4   28.30    5.00
 -10  -1  -4   22.80    5.00
  10  -1   4   37.40    5.60
 -10  -1  -4   20.40    5.00
 -10   1  -4   19.10    5.00
 -10   1  -4   17.70    4.30
  10   1   4   34.30    6.70
  10   1   4   30.00    5.80
 -11  -1  -4   59.69    8.30
 -11  -1  -4   67.29    8.00
  11  -1   4   57.59    8.40
  11  -1   4  100.19    9.20
 -11   1  -4   69.79    9.00
 -11   1  -4   90.49   10.40
  11   1   4   82.09   10.00
  12  -1   4    8.90    4.80
 -12  -1  -4   12.30    5.60
  12  -1   4    6.40    4.10
 -12  -1  -4    7.40    4.20
 -12   1  -4    8.60    4.50
  12   1   4    9.70    5.30
 -12   1  -4    5.40    4.60
 -13  -1  -4    0.20    4.10
  13  -1   4   -4.90    3.80
  13  -1   4   -2.50    4.00
  13   1   4   -5.60    4.30
 -13   1  -4   -4.10    3.70
 -13   1  -4   -6.30    3.70
  13  -2  -4    6.70    5.10
 -13   2   4   -1.20    3.90
  13   2  -4   13.50    4.90
  12  -2  -4    6.40    3.90
  12  -2  -4    8.00    4.90
  12   2  -4    3.40    4.50
 -12   2   4   10.40    4.50
 -11  -2   4   10.80    5.00
  11  -2  -4   16.20    4.50
  11  -2  -4   16.00    5.00
 -11   2   4   25.30    5.90
  11   2  -4   14.80    4.80
 -10  -2   4   40.80    6.70
 -10  -2   4   29.50    5.30
  10  -2  -4   27.30    5.20
  10  -2  -4   29.50    5.10
  10   2  -4   30.40    6.00
 -10   2   4   35.50    5.70
   9  -2  -4   54.59    6.20
   9  -2  -4   64.79    7.50
   9  -2  -4   50.09    5.80
  -9  -2   4   54.79    6.30
  -9  -2   4   62.39    7.20
   9   2  -4   54.29    7.30
  -9   2   4   63.39    6.80
  -9   2   4   54.49    6.40
  -8  -2   4   18.10    4.60
   8  -2  -4   17.60    3.50
   8  -2  -4   16.80    3.80
  -8  -2   4   21.00    4.00
   8  -2  -4   15.40    3.50
   8   2  -4   13.40    3.80
  -8   2   4   26.00    4.50
  -8   2   4   20.80    3.90
  -7  -2   4   23.00    4.20
   7  -2  -4   23.00    4.00
   7  -2  -4   23.80    3.60
  -7  -2   4   25.80    3.90
   7  -2  -4   23.90    3.60
  -7   2   4   24.80    3.80
   7   2  -4   25.20    4.20
   7   2  -4   29.20    4.40
  -7   2   4   22.60    3.50
   7   2  -4   25.60    4.40
  -6  -2   4   15.10    3.40
   6  -2  -4   16.50    3.20
   6  -2  -4   12.20    2.60
  -6  -2   4   15.20    2.90
   6  -2  -4   12.50    2.60
  -6   2   4   13.50    2.80
  -6   2   4   18.00    3.30
   6   2  -4   14.60    3.30
   6   2  -4   18.00    3.30
   6   2  -4   16.30    3.50
  -5  -2   4   76.39    5.30
   5  -2  -4   75.69    4.80
   5  -2  -4   71.39    4.90
   5  -2  -4   77.19    4.90
  -5  -2   4   72.09    5.20
  -5  -2   4   77.39    4.90
  -5   2   4   73.79    4.70
   5   2  -4   74.19    4.90
  -5   2   4   78.79    4.90
   5   2  -4   74.99    5.20
  -4  -2   4  409.96   13.80
   4  -2  -4  384.46   13.30
  -4  -2   4  389.06   13.60
   4  -2  -4  367.36   13.30
   4  -2  -4  392.56   13.20
  -4  -2   4  374.16   13.10
   4   2  -4  412.16   13.70
  -4   2   4  395.06   13.20
   4   2  -4  378.46   13.30
  -4   2   4  387.76   12.90
  -3  -2   4  252.07    9.40
   3  -2  -4  251.27    9.20
   3  -2  -4  245.58    9.20
  -3  -2   4  253.57    9.40
   3  -2  -4  264.47    9.30
  -3  -2   4  237.48    9.30
  -3  -2   4  254.77    9.00
  -3   2   4  253.97    9.00
   3   2  -4  249.68    9.20
  -3   2   4  247.28    9.10
   3   2  -4  248.58    9.30
   2  -2  -4  272.57    9.30
  -2  -2   4  256.57    9.30
   2  -2  -4  264.57    9.30
  -2  -2   4  253.37    9.20
  -2  -2   4  265.07    9.30
   2  -2  -4  255.57    9.20
   2   2  -4  270.47    9.20
  -2   2   4  265.67    9.00
   2   2  -4  258.77    9.20
  -2   2   4  265.27    9.40
  -2   2   4  261.17    9.20
  -1  -2   4   24.60    2.40
   1  -2  -4   31.10    3.10
  -1  -2   4   20.20    2.20
   1  -2  -4   20.60    2.30
  -1  -2   4   29.50    2.70
  -1  -2   4   28.90    2.80
   1  -2  -4   22.80    2.40
  -1  -2   4   28.80    2.70
   1   2  -4   32.30    2.80
  -1   2   4   35.50    3.10
  -1   2   4   27.80    2.60
  -1   2   4   32.10    3.00
   1   2  -4   30.60    2.90
   0  -2   4    4.00    1.30
   0  -2   4    3.40    1.60
   0  -2   4    1.90    1.20
   0  -2   4    1.40    1.00
   0  -2  -4    2.40    1.30
   0  -2  -4    3.00    1.30
   0  -2   4    1.90    1.30
   0  -2   4    2.20    1.10
   0  -2  -4    4.60    1.50
   0   2  -4    0.40    1.00
   0   2   4    3.10    1.50
   0   2   4    3.40    1.60
   0   2  -4    5.30    1.40
   0   2   4    3.20    1.50
   1  -2   4   46.50    2.70
   1  -2   4   47.00    2.70
   1  -2   4   49.30    2.90
  -1  -2  -4   52.89    3.50
   1  -2   4   47.00    3.70
   1  -2   4   38.40    2.80
   1  -2   4   48.00    3.00
  -1  -2  -4   45.10    3.20
  -1   2  -4   47.60    2.80
  -1   2  -4   47.40    2.80
   1   2   4   51.09    3.40
   1   2   4   47.50    3.30
   1   2   4   48.10    2.60
   1   2   4   53.59    4.30
  -1   2  -4   42.50    2.60
  -2  -2  -4   18.80    2.60
   2  -2   4   15.60    2.40
   2  -2   4   18.30    2.00
   2  -2   4   22.30    2.70
   2  -2   4   18.90    2.00
   2  -2   4   17.30    2.10
  -2  -2  -4   15.50    2.70
  -2  -2  -4   17.90    2.50
  -2   2  -4   13.80    2.00
  -2   2  -4   20.00    2.20
   2   2   4   22.70    3.00
   2   2   4   13.20    2.30
  -2   2  -4   14.30    2.00
   2   2   4   22.70    2.70
   2   2   4   20.10    2.10
   2   2   4   15.80    2.60
   3  -2   4   43.30    3.00
   3  -2   4   48.10    4.40
  -3  -2  -4   53.69    4.50
  -3  -2  -4   51.59    4.60
   3  -2   4   41.90    3.00
   3  -2   4   45.60    3.40
  -3  -2  -4   54.19    4.60
   3  -2   4   47.00    3.00
   3   2   4   50.39    3.00
   3   2   4   51.59    4.60
  -3   2  -4   45.00    3.20
   3   2   4   51.69    4.50
   3   2   4   59.79    5.10
   3   2   4   53.09    3.90
   3   2   4   49.40    4.50
  -3   2  -4   46.20    3.00
  -3   2  -4   41.00    3.10
   4  -2   4    3.10    1.40
   4  -2   4    3.20    1.70
   4  -2   4    1.50    1.70
  -4  -2  -4    2.20    1.70
  -4  -2  -4    1.80    1.60
   4  -2   4    4.00    1.40
  -4  -2  -4    3.60    1.80
   4   2   4    3.90    1.80
   4   2   4    1.60    1.70
   4   2   4    4.90    2.10
  -4   2  -4    5.60    1.60
   4   2   4    4.40    1.70
   4   2   4    2.40    1.30
  -4   2  -4    3.10    1.60
  -4   2  -4    3.70    1.60
   4   2   4    4.90    2.00
  -5  -2  -4  300.77   11.90
  -5  -2  -4  320.17   12.40
   5  -2   4  324.57   12.10
  -5  -2  -4  300.47   12.40
   5  -2   4  300.47   11.10
   5  -2   4  351.16   11.40
   5  -2   4  295.37   11.80
   5   2   4  309.17   12.50
   5   2   4  295.57   12.40
  -5   2  -4  311.27   12.60
  -5   2  -4  320.07   11.40
   5   2   4  319.07   12.10
   5   2   4  325.77   12.30
   5   2   4  308.67   12.40
  -5   2  -4  306.47   11.00
  -6  -2  -4   22.60    3.90
   6  -2   4   23.90    4.00
  -6  -2  -4   13.70    3.30
   6  -2   4   12.00    2.50
   6  -2   4   18.40    2.80
   6  -2   4   22.00    3.80
  -6   2  -4   18.00    3.60
  -6   2  -4   15.40    3.20
   6   2   4   20.30    3.70
  -6   2  -4   17.10    2.80
   6   2   4    7.50    2.30
   6   2   4   14.90    3.00
   6   2   4   17.40    3.40
  -7  -2  -4    9.10    3.10
  -7  -2  -4    3.50    2.60
   7  -2   4    6.80    2.30
   7  -2   4    9.80    3.00
   7  -2   4    8.00    2.50
  -7  -2  -4    6.40    2.80
  -7   2  -4    3.90    2.30
   7   2   4    7.40    3.00
  -7   2  -4    5.30    2.70
   7   2   4    5.30    2.30
   8  -2   4   15.40    3.70
  -8  -2  -4   10.50    3.70
  -8  -2  -4   15.50    4.10
  -8  -2  -4   17.40    3.90
   8  -2   4    8.10    2.80
   8  -2   4   17.70    3.50
   8   2   4   17.50    4.00
   8   2   4   12.30    3.90
  -8   2  -4   13.90    3.90
  -8   2  -4   17.20    3.80
  -9  -2  -4  123.09   11.00
   9  -2   4   90.79    6.80
  -9  -2  -4  105.59    9.70
   9  -2   4   86.49    8.80
   9  -2   4   99.49    6.90
  -9  -2  -4  122.89   10.80
   9   2   4  118.29   11.60
  -9   2  -4   96.59    9.90
  -9   2  -4  111.49    9.60
  10  -2   4   -1.80    2.30
 -10  -2  -4   -3.60    2.30
  10  -2   4    1.50    2.70
  10  -2   4   -1.90    2.70
 -10  -2  -4    0.20    2.90
 -10   2  -4   -0.70    2.80
 -10   2  -4   -0.10    2.80
  10   2   4   -3.20    2.50
  11  -2   4    1.10    3.20
  11  -2   4    3.10    3.90
  11  -2   4    1.40    2.80
 -11  -2  -4   -1.20    3.30
 -11  -2  -4   -3.60    2.50
 -11   2  -4   -0.40    3.40
 -11   2  -4    3.30    3.80
  11   2   4   -3.90    3.40
  12  -2   4   20.30    5.00
  12  -2   4   14.20    4.30
  12  -2   4   23.00    6.90
 -12  -2  -4   13.70    5.50
 -12   2  -4   18.80    6.00
  12   2   4   23.40    7.10
 -12   2  -4   11.80    5.80
  13  -2   4   39.00    6.60
  13  -2   4   29.20    5.50
  13  -2   4   41.70    8.80
  13   2   4   29.30    6.90
  13  -3  -4    6.20    4.00
  13  -3  -4    6.50    4.90
  13   3  -4   10.10    5.20
 -13   3   4   18.00    5.40
 -12  -3   4   69.19    9.00
  12  -3  -4   65.89    8.50
  12  -3  -4   80.69    8.60
 -12   3   4   69.59    8.40
  12   3  -4   60.39    8.70
  11  -3  -4  102.79    9.60
  11  -3  -4   93.99   10.30
 -11  -3   4   79.39    9.40
  11  -3  -4  106.49    7.90
 -11   3   4  101.39    9.90
  11   3  -4   94.89   10.00
  10  -3  -4    2.60    3.00
  10  -3  -4    3.00    2.60
 -10  -3   4   -1.30    3.60
  10  -3  -4   -1.70    2.70
 -10   3   4    4.00    3.20
  10   3  -4   -2.00    2.90
  -9  -3   4   15.60    3.90
  -9  -3   4   15.30    4.50
   9  -3  -4   16.40    3.60
   9  -3  -4   12.90    3.60
   9  -3  -4   14.50    3.90
  -9   3   4   11.70    3.50
   9   3  -4    9.60    4.00
   8  -3  -4  190.18   10.30
  -8  -3   4  219.78   10.60
  -8  -3   4  221.78   11.20
   8  -3  -4  227.98   10.10
   8  -3  -4  206.88    9.90
  -8   3   4  224.68   10.30
   8   3  -4  214.78   11.20
  -8   3   4  230.28   10.20
   8   3  -4  218.88   11.00
  -7  -3   4  117.59    7.00
  -7  -3   4  118.59    7.70
   7  -3  -4  115.79    6.60
   7  -3  -4  121.09    6.70
   7  -3  -4  102.29    6.90
   7   3  -4  121.79    7.30
   7   3  -4  115.49    7.60
  -7   3   4  122.89    6.90
  -7   3   4  121.89    6.70
  -6  -3   4    1.80    2.20
   6  -3  -4   -1.70    1.50
   6  -3  -4    2.60    1.70
  -6  -3   4   -0.10    1.80
   6  -3  -4    0.30    1.80
  -6  -3   4    3.20    2.10
   6   3  -4    4.90    2.30
  -6   3   4    0.40    1.80
  -6   3   4    2.50    1.90
   6   3  -4    0.90    1.80
  -5  -3   4  104.79    6.10
  -5  -3   4  104.89    5.80
   5  -3  -4  100.29    5.50
  -5  -3   4  101.29    6.00
   5  -3  -4   96.29    5.30
   5  -3  -4   93.19    5.60
  -5  -3   4  102.79    6.20
   5   3  -4  102.19    5.90
  -5   3   4  106.89    5.60
   5   3  -4  103.49    6.10
  -5   3   4  102.69    5.50
   4  -3  -4 1359.36   39.00
  -4  -3   4 1290.97   39.50
  -4  -3   4 1401.56   39.80
  -4  -3   4 1324.87   39.30
  -4  -3   4 1375.46   38.50
   4  -3  -4 1345.57   39.00
   4  -3  -4 1308.37   38.90
   4   3  -4 1341.07   38.70
  -4   3   4 1327.97   38.10
  -4   3   4 1334.97   38.60
   4   3  -4 1374.96   39.40
  -3  -3   4   34.00    3.70
   3  -3  -4   33.30    3.10
  -3  -3   4   32.20    3.30
   3  -3  -4   29.40    3.10
   3  -3  -4   30.30    3.00
  -3  -3   4   30.60    3.10
  -3   3   4   27.90    2.90
  -3   3   4   28.20    3.00
   3   3  -4   32.00    3.40
   3   3  -4   35.20    3.30
   2  -3  -4   55.59    3.60
  -2  -3   4   62.89    3.90
   2  -3  -4   62.89    3.60
  -2  -3   4   58.39    3.60
   2  -3  -4   59.09    3.70
  -2  -3   4   61.09    3.70
  -2   3   4   60.39    3.60
  -2   3   4   55.29    3.60
  -2   3   4   65.79    3.80
   2   3  -4   60.19    3.60
   2   3  -4   62.29    3.70
  -1  -3   4  322.67   10.80
  -1  -3   4  323.27   10.60
  -1  -3   4  330.27   10.70
  -1  -3   4  329.07   10.60
   1  -3  -4  331.57   11.00
  -1  -3   4  325.87   10.80
   1  -3  -4  319.07   11.00
  -1  -3   4  329.67   10.70
  -1   3   4  342.77   11.20
  -1   3   4  328.27   10.80
   1   3  -4  330.77   10.50
  -1   3   4  339.87   11.00
   0  -3   4  135.69    5.80
   0  -3   4  134.19    4.90
   0  -3  -4  124.99    5.80
   0  -3   4  144.59    5.60
   0  -3  -4  129.89    5.80
   0  -3   4  129.69    5.20
   0  -3   4  135.49    5.00
   0  -3  -4  128.59    5.60
   0  -3  -4  129.99    4.70
   0  -3  -4  134.69    5.80
   0   3   4  152.18    6.00
   0   3   4  130.59    5.90
   0   3  -4  131.49    5.10
   0   3  -4  133.69    5.10
   0   3  -4  130.99    5.00
   0   3   4  133.09    5.70
  -1  -3  -4   91.39    4.50
   1  -3   4   84.49    4.50
   1  -3   4   85.39    3.90
  -1  -3  -4   91.69    4.00
   1  -3   4   80.59    3.30
   1  -3   4   82.49    4.20
  -1  -3  -4   85.39    4.60
  -1  -3  -4   77.89    4.60
  -1   3  -4   86.19    3.70
  -1   3  -4   84.59    3.70
  -1   3  -4   86.29    3.70
   1   3   4   85.19    4.50
   1   3   4   82.49    3.30
  -1   3  -4   74.19    3.40
   1   3   4   80.19    4.60
   1   3   4   74.99    4.40
  -2  -3  -4    1.10    1.60
   2  -3   4    3.20    1.40
  -2  -3  -4    2.50    1.40
   2  -3   4    3.70    1.70
  -2  -3  -4    1.90    1.40
  -2  -3  -4    0.80    1.30
   2   3   4    5.30    1.70
   2   3   4    1.50    1.60
  -2   3  -4    2.50    1.10
   2   3   4    5.30    1.10
  -2   3  -4    1.90    1.20
   2   3   4    4.00    1.80
  -2   3  -4    3.20    1.00
  -3  -3  -4  287.97   10.40
   3  -3   4  272.27    8.80
  -3  -3  -4  289.17   10.40
   3  -3   4  282.87    9.70
   3  -3   4  281.97   10.40
  -3  -3  -4  282.07   10.70
  -3   3  -4  265.27    9.30
   3   3   4  276.47    8.80
  -3   3  -4  275.97    8.90
   3   3   4  252.77   10.40
   3   3   4  277.07   10.40
   3   3   4  265.37   10.60
   3   3   4  283.27   10.90
  -3   3  -4  284.47    9.50
  -4  -3  -4  179.48    7.70
  -4  -3  -4  162.88    7.70
  -4  -3  -4  156.08    7.80
   4  -3   4  172.08    7.20
   4  -3   4  164.48    6.30
   4  -3   4  164.38    6.30
   4  -3   4  170.78    7.80
   4   3   4  175.48    8.20
  -4   3  -4  158.38    6.80
   4   3   4  176.18    7.80
  -4   3  -4  163.28    6.30
   4   3   4  169.18    8.10
  -4   3  -4  172.58    7.00
   4   3   4  175.48    7.90
   4   3   4  175.98    8.10
   5  -3   4   13.50    2.90
  -5  -3  -4   16.20    3.30
   5  -3   4   11.80    2.00
  -5  -3  -4   16.30    3.10
   5  -3   4   18.50    3.20
   5  -3   4   16.20    2.20
  -5  -3  -4   12.60    2.80
   5   3   4   15.10    3.00
   5   3   4   19.40    3.30
   5   3   4    6.50    2.20
  -5   3  -4   12.10    2.40
   5   3   4   12.90    3.10
  -5   3  -4   17.00    2.40
   5   3   4   23.40    3.90
   5   3   4   11.60    2.90
  -5   3  -4   14.90    2.60
   6  -3   4  261.37   10.70
   6  -3   4  242.98    9.30
  -6  -3  -4  259.77   11.00
  -6  -3  -4  266.17   11.50
  -6  -3  -4  233.28   11.10
   6  -3   4  252.17    9.40
   6  -3   4  245.98   10.90
  -6   3  -4  242.68   11.40
   6   3   4  231.18   11.10
   6   3   4  259.17   11.10
  -6   3  -4  251.27   10.10
   6   3   4  241.58   11.10
   7  -3   4  170.38    9.10
  -7  -3  -4  199.08   10.20
   7  -3   4  199.48    8.20
  -7  -3  -4  191.98    9.70
   7  -3   4  179.98    8.00
  -7  -3  -4  184.58   10.00
  -7   3  -4  183.38   10.10
   7   3   4  180.98    9.70
  -7   3  -4  191.18    8.90
   7   3   4  176.48   10.00
  -8  -3  -4   27.90    5.10
  -8  -3  -4   31.50    5.00
  -8  -3  -4   23.10    5.00
   8  -3   4   26.80    3.90
   8  -3   4   23.40    4.70
   8  -3   4   27.40    3.60
  -8   3  -4   31.40    4.70
   8   3   4   24.50    4.50
  -8   3  -4   28.20    5.00
  -9  -3  -4   54.59    6.80
  -9  -3  -4   50.39    7.00
   9  -3   4   51.79    5.30
  -9  -3  -4   59.89    7.20
   9  -3   4   43.50    6.30
   9  -3   4   59.59    5.70
  -9   3  -4   54.69    6.20
   9   3   4   50.39    7.70
  -9   3  -4   47.30    7.30
  10  -3   4   17.30    3.80
 -10  -3  -4   17.40    5.10
 -10  -3  -4   26.80    5.50
  10  -3   4   27.30    4.40
  10  -3   4   16.20    4.80
  10   3   4   23.80    6.10
 -10   3  -4   11.70    4.60
 -10   3  -4   23.40    5.20
 -11  -3  -4   24.60    6.40
  11  -3   4   32.70    7.10
  11  -3   4   31.60    4.90
  11  -3   4   38.30    4.90
 -11   3  -4   23.40    6.20
 -11   3  -4   25.80    5.80
  11   3   4   21.30    5.80
  12  -3   4   14.10    4.20
  12  -3   4    8.30    5.20
  12  -3   4   15.00    4.10
 -12  -3  -4   17.20    6.10
  12   3   4   10.20    5.80
 -12   3  -4   14.90    5.40
 -12   3  -4   14.10    4.90
  13  -4  -4   28.70    5.50
  13  -4  -4   27.50    5.60
  13  -4  -4   21.00    6.10
  13   4  -4   40.50    8.70
 -13   4   4   17.00    6.00
 -12  -4   4   39.10    8.00
  12  -4  -4   35.70    5.70
  12  -4  -4   39.30    7.00
  12  -4  -4   36.70    5.70
  12   4  -4   31.60    7.70
 -12   4   4   40.80    7.10
  11  -4  -4   41.00    7.00
  11  -4  -4   36.10    5.50
 -11  -4   4   30.90    6.80
  11  -4  -4   37.00    5.50
  11   4  -4   34.00    6.90
 -11   4   4   25.70    4.90
  10  -4  -4   29.90    5.40
  10  -4  -4   19.50    4.20
 -10  -4   4   22.30    6.00
  10  -4  -4   22.00    4.20
  10   4  -4   24.00    5.60
 -10   4   4   24.90    4.80
   9  -4  -4    3.80    2.70
  -9  -4   4   -2.60    2.80
   9  -4  -4    4.40    3.20
   9  -4  -4    4.50    2.60
   9   4  -4    6.10    3.90
  -9   4   4    2.10    2.70
  -8  -4   4  249.58   12.20
   8  -4  -4  252.87   10.60
  -8  -4   4  234.08   11.20
   8  -4  -4  249.78   10.50
   8  -4  -4  235.08   11.30
  -8   4   4  230.38   10.80
   8   4  -4  243.98   11.60
   8   4  -4  231.68   11.90
   7  -4  -4   43.50    4.40
  -7  -4   4   41.50    5.30
   7  -4  -4   36.50    4.00
  -7  -4   4   29.70    4.20
   7  -4  -4   30.40    4.30
  -7   4   4   37.20    4.50
   7   4  -4   32.70    4.90
   7   4  -4   36.40    4.70
  -7   4   4   34.40    4.50
  -6  -4   4   28.30    4.00
   6  -4  -4   27.30    3.30
  -6  -4   4   21.40    3.80
   6  -4  -4   19.50    3.30
   6  -4  -4   26.90    3.30
  -6  -4   4   29.20    4.30
  -6  -4   4   25.90    4.10
   6   4  -4   26.20    4.00
  -6   4   4   24.10    3.50
   6   4  -4   20.50    3.50
  -6   4   4   21.60    3.60
  -5  -4   4    3.20    1.70
  -5  -4   4    0.70    1.80
   5  -4  -4    0.90    1.70
   5  -4  -4    3.60    1.60
   5  -4  -4    2.20    1.60
  -5  -4   4    3.40    1.90
  -5  -4   4    3.10    2.30
  -5   4   4    1.70    1.80
  -5   4   4    3.00    1.70
   5   4  -4    3.40    2.00
   5   4  -4    4.50    2.00
   4  -4  -4    1.00    1.40
  -4  -4   4    1.90    2.00
   4  -4  -4    0.30    1.40
  -4  -4   4    1.00    1.50
  -4  -4   4    1.70    1.70
  -4  -4   4    1.10    1.50
   4  -4  -4    2.20    1.40
   4   4  -4    0.80    1.60
   4   4  -4    0.60    1.50
  -4   4   4    0.70    1.50
  -4   4   4   -0.70    1.20
  -3  -4   4    1.30    1.50
  -3  -4   4    2.60    1.70
   3  -4  -4    1.50    1.40
  -3  -4   4    2.00    1.70
   3  -4  -4    2.00    1.40
   3  -4  -4    2.00    1.60
  -3   4   4    2.20    1.50
  -3   4   4    0.30    1.40
   3   4  -4    2.00    1.50
   3   4  -4    3.10    1.60
  -2  -4   4   48.20    3.30
   2  -4  -4   55.19    3.40
  -2  -4   4   54.09    3.50
   2  -4  -4   52.79    3.30
  -2  -4   4   49.10    4.00
  -2  -4   4   50.79    3.60
   2  -4  -4   55.69    3.60
  -2   4   4   52.69    3.50
  -2   4   4   50.49    3.40
   2   4  -4   56.99    3.50
  -2   4   4   50.19    3.40
   2   4  -4   53.89    3.50
  -1  -4   4   75.39    4.20
  -1  -4   4   74.39    3.70
   1  -4  -4   74.49    4.10
  -1  -4   4   72.89    3.90
  -1  -4   4   72.19    3.50
   1  -4  -4   74.09    3.70
  -1  -4   4   70.99    3.50
  -1  -4   4   75.39    4.30
   1  -4  -4   70.19    3.90
  -1   4   4   81.29    4.30
   1   4  -4   76.29    3.70
  -1   4   4   73.09    4.10
   1   4  -4   76.09    3.80
  -1   4   4   72.09    4.00
   0  -4  -4   70.19    3.50
   0  -4  -4   75.29    4.20
   0  -4   4   73.29    3.50
   0  -4   4   75.59    4.20
   0  -4  -4   70.59    4.30
   0  -4  -4   71.79    4.10
   0  -4   4   68.69    4.20
   0   4   4   67.89    4.20
   0   4  -4   75.79    3.40
   0   4   4   75.29    4.10
   0   4  -4   71.69    3.40
   0   4   4   68.29    4.10
   1  -4   4  161.88    5.80
  -1  -4  -4  161.58    6.10
   1  -4   4  158.88    6.80
   1  -4   4  170.48    7.00
  -1  -4  -4  149.29    6.60
  -1  -4  -4  166.98    7.10
  -1  -4  -4  177.38    7.10
  -1  -4  -4  156.68    7.00
  -1  -4  -4  165.58    6.00
  -1   4  -4  172.58    5.80
   1   4   4  158.08    6.90
  -1   4  -4  161.88    5.70
   1   4   4  164.08    7.10
   1   4   4  153.98    6.80
  -2  -4  -4  104.49    5.60
   2  -4   4  104.39    4.40
  -2  -4  -4  107.09    5.60
   2  -4   4  111.89    5.60
  -2  -4  -4   96.99    5.50
  -2  -4  -4  103.39    4.90
  -2  -4  -4  101.49    5.20
  -2   4  -4  108.89    4.30
  -2   4  -4  101.09    4.20
   2   4   4   96.69    5.50
   2   4   4   96.79    5.50
   2   4   4   96.69    5.30
  -3  -4  -4   42.70    4.00
   3  -4   4   34.40    3.90
   3  -4   4   40.10    3.30
  -3  -4  -4   36.40    3.90
  -3  -4  -4   35.40    3.90
  -3  -4  -4   42.30    4.20
  -3   4  -4   37.80    3.10
  -3   4  -4   36.30    3.10
   3   4   4   43.80    4.80
   3   4   4   34.40    4.00
   3   4   4   41.90    4.50
   4  -4   4  139.89    7.10
  -4  -4  -4  126.59    6.80
  -4  -4  -4  133.19    7.10
  -4  -4  -4  129.79    7.20
   4  -4   4  146.39    6.20
  -4  -4  -4  138.59    6.80
  -4   4  -4  126.09    5.70
   4   4   4  138.49    7.30
   4   4   4  148.79    7.20
   4   4   4  131.99    7.20
  -4   4  -4  135.59    5.80
   4   4   4  116.89    6.70
  -5  -4  -4    4.20    1.80
  -5  -4  -4    2.80    1.90
   5  -4   4    4.00    2.40
   5  -4   4    4.60    2.00
  -5  -4  -4    6.30    3.00
   5   4   4    3.00    1.90
   5   4   4    3.30    2.20
  -5   4  -4    7.20    2.10
   5   4   4    6.60    2.60
   5   4   4    4.20    2.40
  -5   4  -4    4.40    1.70
   5   4   4    5.30    2.60
   5   4   4    9.80    2.80
  -6  -4  -4    0.70    2.00
  -6  -4  -4    4.10    2.40
   6  -4   4    0.80    2.00
   6  -4   4    1.20    1.80
  -6  -4  -4    0.70    2.20
  -6   4  -4    5.50    2.70
  -6   4  -4   -1.10    1.60
   6   4   4   -0.20    2.00
   6   4   4   -1.00    2.10
   6   4   4    1.70    1.80
   6   4   4    0.00    1.90
   7  -4   4  103.19    5.20
   7  -4   4  110.99    6.90
  -7  -4  -4  108.09    7.80
  -7  -4  -4   97.39    7.40
  -7  -4  -4  122.29    7.50
  -7   4  -4  113.09    7.80
  -7   4  -4  100.09    6.30
   7   4   4   95.59    9.00
  -8  -4  -4   35.80    5.60
   8  -4   4   35.60    3.80
   8  -4   4   33.50    3.70
  -8  -4  -4   32.30    5.60
  -8  -4  -4   41.30    5.60
   8  -4   4   37.20    5.60
   8   4   4   43.20    6.60
  -8   4  -4   27.10    4.30
  -8   4  -4   24.20    5.00
   9  -4   4   21.60    4.70
  -9  -4  -4   12.40    4.40
  -9  -4  -4   18.30    4.20
  -9  -4  -4   19.70    5.20
   9  -4   4   23.50    3.50
  -9   4  -4   19.30    4.00
   9   4   4   18.90    5.20
  -9   4  -4   10.20    4.30
  10  -4   4    3.50    3.80
  10  -4   4    8.40    2.90
 -10  -4  -4    4.00    3.80
 -10  -4  -4    1.40    4.30
 -10   4  -4    0.10    2.70
  10   4   4    7.60    4.10
 -10   4  -4   -2.70    2.60
  11  -4   4    0.10    3.90
 -11  -4  -4    4.30    4.00
  11   4   4   -1.10    3.60
 -11   4  -4    2.40    3.90
 -11   4  -4    3.00    3.40
 -12  -4  -4    8.30    4.90
  12  -4   4   25.20    6.50
 -12   4  -4   20.70    6.50
 -12   4  -4   26.90    6.30
  12   4   4   10.90    5.30
  13  -5  -4    1.90    3.50
  13  -5  -4   -6.90    4.20
  13  -5  -4    1.50    3.80
 -13  -5   4    6.20    5.20
 -13   5   4   -6.20    3.60
  13   5  -4    1.90    5.40
  12  -5  -4   29.50    5.10
  12  -5  -4   25.10    4.80
 -12  -5   4   25.70    7.40
  12  -5  -4   21.90    5.70
  12   5  -4   31.90    7.40
 -12   5   4   18.40    5.40
  11  -5  -4   23.50    5.90
  11  -5  -4   38.10    5.30
 -11  -5   4   25.70    6.20
  11  -5  -4   29.50    4.80
 -11   5   4   18.90    5.10
  11   5  -4   39.30    7.20
 -10  -5   4    1.20    3.60
  10  -5  -4    0.00    2.70
  10  -5  -4   -0.80    2.50
  10  -5  -4    1.80    3.20
 -10   5   4    1.20    3.20
  10   5  -4   -1.60    3.10
  -9  -5   4   33.80    6.20
   9  -5  -4   57.79    6.90
   9  -5  -4   62.89    5.70
   9  -5  -4   62.99    5.70
  -9   5   4   58.79    6.60
   9   5  -4   49.60    7.40
  -8  -5   4  150.28    9.60
   8  -5  -4  147.79    8.70
   8  -5  -4  184.28    8.20
   8  -5  -4  158.78    7.80
   8   5  -4  166.88    9.90
   8   5  -4  158.18    9.30
  -8   5   4  152.08    8.50
  -7  -5   4   45.00    5.80
   7  -5  -4   61.09    6.40
   7  -5  -4   49.00    4.50
  -7  -5   4   54.49    5.60
   7  -5  -4   53.99    4.80
  -7   5   4   45.80    5.10
   7   5  -4   62.69    7.10
   7   5  -4   53.99    6.10
   6  -5  -4    6.50    2.10
  -6  -5   4    2.50    2.70
  -6  -5   4   10.30    3.00
   6  -5  -4    5.30    2.30
  -6  -5   4    7.10    2.70
   6  -5  -4    3.70    1.70
  -6  -5   4    9.60    2.80
   6   5  -4   10.60    2.90
  -6   5   4    6.30    2.20
  -6   5   4    4.10    2.00
   6   5  -4    6.20    2.80
   5  -5  -4   25.90    3.50
   5  -5  -4   28.90    3.10
  -5  -5   4   31.40    4.10
   5  -5  -4   23.60    2.90
  -5  -5   4   26.60    3.70
  -5  -5   4   27.70    3.90
  -5  -5   4   20.80    3.70
  -5   5   4   29.20    3.50
  -5   5   4   27.20    3.20
   5   5  -4   23.70    3.70
   5   5  -4   28.00    3.90
  -5   5   4   26.10    3.20
  -4  -5   4   83.99    5.50
  -4  -5   4   82.19    5.10
   4  -5  -4   90.39    4.60
   4  -5  -4   83.39    4.90
   4  -5  -4   87.49    4.40
  -4  -5   4   94.19    5.40
  -4   5   4   84.59    4.80
   4   5  -4   76.19    5.00
  -4   5   4   77.89    4.50
   4   5  -4   90.59    5.40
  -4   5   4   74.29    4.50
  -3  -5   4    4.50    1.80
  -3  -5   4    3.60    1.70
  -3  -5   4   -0.20    1.70
   3  -5  -4    2.50    1.60
   3  -5  -4    2.40    1.50
   3  -5  -4    1.50    1.30
  -3  -5   4    1.00    1.50
  -3   5   4    2.10    1.50
  -3   5   4    3.80    1.60
   3   5  -4    3.60    1.60
   3   5  -4    2.50    1.60
  -3   5   4    2.00    1.50
  -2  -5   4 1309.27   36.50
   2  -5  -4 1245.28   36.40
   2  -5  -4 1249.18   36.40
  -2  -5   4 1269.77   36.40
  -2  -5   4 1253.87   36.40
  -2  -5   4 1261.07   35.50
  -2  -5   4 1266.57   37.30
   2  -5  -4 1277.57   36.40
   2   5  -4 1226.58   35.80
  -2   5   4 1229.88   35.70
   2   5  -4 1315.37   36.10
  -2   5   4 1275.37   36.10
  -2   5   4 1329.17   37.00
  -1  -5   4  203.78    7.80
  -1  -5   4  196.58    8.00
   1  -5  -4  188.88    7.30
  -1  -5   4  193.98    6.70
  -1  -5   4  190.78    7.20
   1  -5  -4  196.38    7.40
   1  -5  -4  195.88    7.40
  -1  -5   4  192.58    6.70
   1   5  -4  199.78    7.00
  -1   5   4  194.08    7.40
   1   5  -4  199.68    7.10
  -1   5   4  186.08    7.40
  -1   5   4  205.08    7.90
   0  -5  -4    6.00    1.90
   0  -5  -4    4.60    1.70
   0  -5  -4    3.40    1.80
   0  -5   4    6.10    1.50
   0  -5   4    5.10    2.10
   0  -5   4    4.30    1.90
   0  -5  -4    3.70    1.60
   0   5  -4    3.80    1.30
   0   5  -4    4.70    1.20
   0   5   4    1.80    1.50
   0   5   4    1.80    1.60
   0   5   4    4.20    1.70
   1  -5   4  188.88    6.20
  -1  -5  -4  179.98    7.50
  -1  -5  -4  176.48    6.40
  -1  -5  -4  173.78    6.90
   1  -5   4  163.68    7.40
   1  -5   4  179.98    7.70
  -1  -5  -4  181.68    7.70
  -1  -5  -4  186.28    7.70
   1   5   4  173.28    7.50
  -1   5  -4  181.88    6.00
   1   5   4  179.68    7.80
  -1   5  -4  177.68    6.00
   1   5   4  179.78    7.50
  -2  -5  -4   28.20    3.50
  -2  -5  -4   28.40    2.90
  -2  -5  -4   29.10    3.20
   2  -5   4   25.90    3.30
  -2  -5  -4   29.20    3.60
   2  -5   4   28.60    3.80
   2  -5   4   32.20    2.30
  -2  -5  -4   29.90    4.10
   2   5   4   32.80    3.70
   2   5   4   41.10    4.30
  -2   5  -4   29.00    2.10
   2   5   4   38.30    4.30
  -2   5  -4   33.80    2.20
  -3  -5  -4  194.68    8.20
   3  -5   4  200.98    8.70
   3  -5   4  201.48    7.20
  -3  -5  -4  190.28    8.10
  -3  -5  -4  199.58    8.80
  -3  -5  -4  203.08    8.80
  -3  -5  -4  194.28    8.80
   3   5   4  204.48    8.70
   3   5   4  200.68    8.80
  -3   5  -4  193.98    6.90
   3   5   4  182.38    8.80
  -3   5  -4  197.38    6.90
   4  -5   4   33.00    3.30
   4  -5   4   25.00    3.90
  -4  -5  -4   31.70    4.60
  -4  -5  -4   26.60    3.80
  -4  -5  -4   25.60    4.00
  -4  -5  -4   22.80    3.40
  -4  -5  -4   32.00    3.90
  -4   5  -4   27.70    2.70
  -4   5  -4   28.90    2.90
   4   5   4   21.50    3.70
   4   5   4   22.30    3.50
   4   5   4   18.40    3.40
  -5  -5  -4    5.10    2.50
   5  -5   4    0.50    1.60
  -5  -5  -4    7.10    2.40
  -5  -5  -4    4.10    2.30
  -5  -5  -4    2.40    2.20
   5  -5   4    4.40    2.30
   5   5   4    4.30    2.50
  -5   5  -4    6.00    2.00
  -5   5  -4    3.00    1.50
   5   5   4    5.00    2.30
   5   5   4    4.00    2.50
   6  -5   4  170.48    9.10
  -6  -5  -4  162.38    8.80
  -6  -5  -4  180.88    9.50
   6  -5   4  166.18    8.10
  -6  -5  -4  180.38    9.30
   6   5   4  173.38    9.50
  -6   5  -4  171.48    9.40
   6   5   4  175.88    9.20
  -6   5  -4  167.88    7.60
   6   5   4  162.48    9.30
  -7  -5  -4  325.07   14.20
  -7  -5  -4  324.07   13.50
  -7  -5  -4  299.97   13.80
   7  -5   4  298.77   12.40
  -7   5  -4  291.27   11.80
   7   5   4  268.67   13.40
  -7   5  -4  325.47   14.10
   8  -5   4    4.10    3.00
  -8  -5  -4    4.70    3.40
  -8  -5  -4   14.00    4.60
  -8   5  -4    3.40    2.40
   8   5   4    1.80    3.40
  -8   5  -4    4.30    3.20
  -9  -5  -4   49.80    7.20
  -9  -5  -4   48.30    7.00
   9  -5   4   52.79    6.60
   9   5   4   37.40    6.20
  -9   5  -4   46.50    5.90
  -9   5  -4   56.49    7.60
 -10  -5  -4    4.80    4.00
 -10  -5  -4    3.80    4.40
  10  -5   4   11.00    4.40
 -10   5  -4    3.60    3.50
 -10   5  -4    8.10    4.30
  10   5   4    5.10    4.50
  11  -5   4   -0.30    4.00
 -11  -5  -4    1.40    3.80
 -11   5  -4   12.30    4.40
  11   5   4   11.50    5.70
 -11   5  -4    6.00    4.50
  12  -5   4   10.70    5.50
 -12  -5  -4   10.60    5.40
  12   5   4    0.10    4.10
 -12   5  -4    0.10    4.00
 -12   5  -4    3.70    4.60
  13  -6  -4   51.09    9.00
 -13  -6   4   42.30    8.00
 -13   6   4   35.60    7.20
  13   6  -4   50.39    9.80
  12  -6  -4   -4.10    3.90
 -12  -6   4   -3.30    3.70
  12  -6  -4   -1.10    2.90
  12   6  -4   -2.50    4.10
 -12   6   4   -4.40    3.80
  11  -6  -4   38.40    4.80
 -11  -6   4   32.40    6.60
  11  -6  -4   35.50    6.60
  11  -6  -4   37.30    4.70
 -11   6   4   27.60    6.10
  11   6  -4   41.50    7.40
 -10  -6   4  309.57   15.50
  10  -6  -4  296.87   12.00
  10  -6  -4  301.67   12.00
  10  -6  -4  286.67   14.20
  10   6  -4  296.17   15.30
 -10   6   4  303.47   14.10
   9  -6  -4   51.79    5.00
   9  -6  -4   56.99    5.20
  -9  -6   4   47.30    7.10
   9  -6  -4   57.99    7.10
  -9   6   4   51.49    6.40
   9   6  -4   61.59    7.80
  -8  -6   4    6.50    3.60
   8  -6  -4   -0.20    1.90
   8  -6  -4    2.10    2.70
   8  -6  -4    3.20    2.10
   8   6  -4    1.10    3.00
  -8   6   4    5.50    2.60
   8   6  -4    4.60    3.00
  -8   6   4    6.10    2.70
   7  -6  -4   28.80    3.30
   7  -6  -4   23.30    3.20
   7  -6  -4   34.00    4.90
  -7  -6   4   40.70    5.80
  -7  -6   4   29.40    4.80
  -7   6   4   33.60    4.40
  -7   6   4   37.40    4.40
   7   6  -4   41.10    5.90
   7   6  -4   34.00    5.10
   6  -6  -4  111.79    6.40
   6  -6  -4  106.49    5.30
   6  -6  -4  105.09    5.30
  -6  -6   4   99.39    6.70
  -6  -6   4  115.79    7.10
  -6  -6   4  103.39    7.20
   6   6  -4  100.69    6.70
  -6   6   4  101.09    5.60
   6   6  -4  119.59    7.20
  -6   6   4  100.89    5.90
   5  -6  -4  108.79    5.10
  -5  -6   4  122.89    7.10
   5  -6  -4  114.79    6.10
  -5  -6   4  102.99    6.40
   5  -6  -4  113.09    5.20
  -5  -6   4  110.69    6.50
  -5   6   4  105.99    5.20
   5   6  -4  106.39    6.50
   5   6  -4  113.59    6.60
  -5   6   4  111.89    5.80
  -5   6   4  106.99    5.70
  -4  -6   4    4.90    2.00
   4  -6  -4    1.90    1.60
  -4  -6   4    4.20    2.40
  -4  -6   4    3.80    2.00
   4  -6  -4    2.70    1.40
   4  -6  -4    2.20    1.50
   4   6  -4    0.80    1.70
  -4   6   4    1.10    1.50
  -4   6   4    4.90    1.90
  -4   6   4    3.40    1.60
   4   6  -4    4.00    2.00
   3  -6  -4  568.74   17.80
  -3  -6   4  587.84   18.70
  -3  -6   4  606.64   18.70
  -3  -6   4  582.04   18.90
   3  -6  -4  577.14   18.50
   3  -6  -4  598.74   17.90
  -3  -6   4  595.74   18.20
  -3   6   4  601.94   18.30
  -3   6   4  591.74   17.90
   3   6  -4  578.74   18.50
   3   6  -4  576.34   18.60
  -3   6   4  579.04   18.00
  -3   6   4  606.34   18.70
  -2  -6   4 1829.62   54.29
  -2  -6   4 1974.20   52.99
  -2  -6   4 1951.10   54.39
   2  -6  -4 1896.81   54.29
  -2  -6   4 1897.41   55.49
   2  -6  -4 1958.60   54.99
   2  -6  -4 1898.31   54.29
  -2  -6   4 1924.71   54.29
  -2  -6   4 1914.61   54.29
  -2   6   4 1934.61   53.79
   2   6  -4 1912.31   53.49
   2   6  -4 1940.91   53.79
  -2   6   4 1967.40   55.09
  -2   6   4 1951.90   53.49
   2   6  -4 1982.90   53.39
  -2   6   4 2066.79   53.79
   1  -6  -4    1.20    1.20
  -1  -6   4    0.80    1.50
   1  -6  -4    3.40    1.40
  -1  -6   4    0.50    1.80
   1  -6  -4    2.00    1.60
   1  -6  -4    1.50    1.70
  -1  -6   4    4.10    1.90
  -1   6   4   -0.60    1.30
   1   6  -4    1.90    1.30
  -1   6   4    4.30    1.80
  -1   6   4    1.20    1.30
   1   6  -4    0.10    1.20
   0  -6  -4  308.17   11.60
   0  -6  -4  322.27   11.30
   0  -6   4  326.57   11.60
   0  -6   4  338.57   10.40
   0  -6   4  343.87   12.20
   0  -6  -4  326.17   11.40
   0  -6  -4  308.17   11.20
   0   6   4  328.77   11.40
   0   6  -4  322.87   10.10
   0   6   4  342.37   11.90
   0   6   4  328.17   11.30
   0   6  -4  329.67   10.20
  -1  -6  -4  473.95   15.90
  -1  -6  -4  469.65   15.40
   1  -6   4  457.75   15.60
   1  -6   4  483.85   16.30
  -1  -6  -4  485.45   15.90
  -1  -6  -4  482.05   14.50
  -1  -6  -4  454.95   15.90
   1   6   4  488.85   15.80
  -1   6  -4  467.45   13.70
  -1   6  -4  469.05   13.70
   1   6   4  495.45   16.40
   1   6   4  484.35   15.70
   2  -6   4   31.70    3.90
  -2  -6  -4   39.40    4.20
  -2  -6  -4   36.10    4.10
  -2  -6  -4   29.90    3.60
  -2  -6  -4   36.70    3.30
   2  -6   4   35.50    4.30
   2   6   4   43.20    4.50
   2   6   4   35.90    4.00
   2   6   4   44.70    4.60
  -3  -6  -4   25.90    3.40
  -3  -6  -4   31.20    3.90
   3  -6   4   25.60    3.70
  -3  -6  -4   31.20    4.00
  -3  -6  -4   26.50    3.20
  -3  -6  -4   20.90    3.30
  -3   6  -4   24.20    2.30
   3   6   4   24.80    3.80
   3   6   4   22.50    3.20
  -3   6  -4   26.90    2.30
   3   6   4   21.00    3.50
  -4  -6  -4  316.17   12.60
   4  -6   4  301.77   12.30
  -4  -6  -4  309.67   11.90
  -4  -6  -4  306.17   12.50
   4  -6   4  307.77   10.40
  -4  -6  -4  307.47   11.90
  -4  -6  -4  302.07   12.60
   4   6   4  286.87   12.10
  -4   6  -4  318.37   10.20
  -4   6  -4  307.17   10.10
   4   6   4  313.37   12.90
   4   6   4  302.47   12.50
   5  -6   4  163.58    8.60
  -5  -6  -4  152.88    8.10
  -5  -6  -4  155.28    8.60
  -5  -6  -4  157.48    8.80
   5  -6   4  159.88    7.00
  -5  -6  -4  156.68    8.00
  -5   6  -4  144.29    6.50
   5   6   4  154.78    8.40
  -5   6  -4  165.38    6.80
   5   6   4  143.59    8.40
   5   6   4  156.08    8.80
  -6  -6  -4    3.10    2.40
  -6  -6  -4    1.10    2.30
  -6  -6  -4    2.40    2.40
   6  -6   4    0.60    1.80
   6  -6   4    2.20    2.60
   6   6   4    2.70    2.40
  -6   6  -4    1.00    1.60
   6   6   4    0.90    2.20
   6   6   4    1.70    2.40
  -7  -6  -4   45.10    6.10
  -7  -6  -4   44.60    6.10
   7  -6   4   48.00    5.40
  -7   6  -4   45.70    6.20
   7   6   4   48.80    7.00
  -7   6  -4   44.40    4.60
  -8  -6  -4   69.19    7.90
   8  -6   4   70.59    6.90
  -8  -6  -4   61.39    7.50
   8   6   4   58.29    7.50
  -8   6  -4   57.59    7.40
  -8   6  -4   61.69    5.90
  -9  -6  -4   34.70    6.40
  -9  -6  -4   44.90    7.50
   9  -6   4   36.70    6.00
  -9   6  -4   40.80    5.60
  -9   6  -4   43.70    6.90
   9   6   4   31.90    5.90
 -10  -6  -4    4.10    4.10
  10  -6   4    4.30    3.90
 -10  -6  -4    6.10    4.10
  10   6   4    2.20    3.90
 -10   6  -4    2.70    4.00
 -10   6  -4    0.30    2.80
  11  -6   4   16.50    5.70
 -11  -6  -4   16.60    6.50
 -11   6  -4    6.80    4.70
 -11   6  -4   17.50    4.60
  11   6   4   11.40    5.00
  12  -6   4   11.00    5.70
 -12   6  -4    8.10    4.50
  12   6   4   27.30    7.90
 -12   6  -4   15.90    5.80
  13  -7  -4    0.70    4.70
 -13  -7   4    3.20    4.40
 -13   7   4    0.30    4.90
  13   7  -4    0.10    5.20
  12  -7  -4    5.50    4.80
 -12  -7   4   -1.10    3.60
  12   7  -4    3.20    4.90
 -12   7   4    9.80    5.00
  11  -7  -4   32.50    6.70
 -11  -7   4   37.50    7.20
  11   7  -4   43.40    7.80
 -11   7   4   47.70    7.50
  10  -7  -4    3.40    3.70
 -10  -7   4    2.20    4.10
  10   7  -4   -2.50    3.10
 -10   7   4    0.40    3.00
   9  -7  -4    5.00    3.20
  -9  -7   4    0.00    3.50
   9   7  -4    2.50    3.50
  -9   7   4    0.40    2.90
  -9   7   4    3.50    3.00
   8  -7  -4    5.00    3.00
  -8  -7   4   -3.20    2.90
   8   7  -4   -0.20    2.70
  -8   7   4   -1.60    2.20
   8   7  -4   -1.00    2.90
  -8   7   4    2.40    2.50
  -7  -7   4    0.80    2.50
  -7  -7   4   -1.10    2.50
   7  -7  -4    0.00    2.30
  -7  -7   4    2.30    2.70
   7   7  -4    1.10    2.40
   7   7  -4   -1.00    2.40
  -7   7   4   -1.20    1.80
  -7   7   4    4.30    2.30
   6  -7  -4    2.00    2.10
  -6  -7   4    4.20    2.70
  -6  -7   4    3.40    2.50
  -6  -7   4    3.50    2.70
  -6  -7   4    1.80    2.80
   6   7  -4    1.80    2.50
  -6   7   4    2.70    1.80
  -6   7   4    2.80    2.00
   6   7  -4    1.00    2.20
  -5  -7   4    2.80    2.20
   5  -7  -4    1.60    2.10
  -5  -7   4    3.80    2.60
  -5  -7   4    1.80    2.30
  -5  -7   4    3.20    2.30
   5   7  -4    2.90    2.30
  -5   7   4    2.00    1.90
  -5   7   4    4.70    1.60
   5   7  -4    0.60    2.10
  -5   7   4    5.80    2.10
  -4  -7   4   85.29    5.20
  -4  -7   4   68.89    4.70
   4  -7  -4   80.49    4.90
  -4  -7   4   82.29    5.60
  -4  -7   4   67.39    5.00
  -4  -7   4   77.59    5.10
  -4   7   4   76.19    4.60
  -4   7   4   75.89    3.90
  -4   7   4   71.99    4.50
   4   7  -4   75.89    5.10
   4   7  -4   85.09    5.50
  -3  -7   4   11.50    2.30
   3  -7  -4   10.70    2.40
  -3  -7   4   13.10    2.60
  -3  -7   4   10.40    2.20
  -3  -7   4   10.90    2.60
  -3   7   4   13.00    2.40
  -3   7   4   11.30    2.30
  -3   7   4   13.40    2.60
   3   7  -4   10.70    2.30
   3   7  -4   13.30    2.70
  -3   7   4    9.80    1.90
  -2  -7   4   23.60    2.50
  -2  -7   4   31.80    3.60
  -2  -7   4   24.80    2.50
   2  -7  -4   26.20    3.60
   2  -7  -4   25.40    2.50
   2  -7  -4   23.10    2.40
  -2  -7   4   24.80    3.20
  -2  -7   4   25.90    3.90
  -2   7   4   29.10    2.80
   2   7  -4   23.10    2.50
  -2   7   4   29.80    3.30
   2   7  -4   26.20    3.10
  -2   7   4   22.40    2.90
  -2   7   4   26.80    3.40
   2   7  -4   28.10    3.10
  -1  -7   4   -0.60    1.40
  -1  -7   4    0.10    1.90
   1  -7  -4    0.60    1.20
   1  -7  -4    0.80    1.60
  -1  -7   4    0.40    1.70
   1  -7  -4   -0.90    1.30
   1  -7  -4    0.50    1.60
  -1   7   4    0.00    1.60
  -1   7   4    2.00    1.40
  -1   7   4   -0.90    1.30
   1   7  -4    1.20    1.20
   1   7  -4    3.40    1.40
  -1   7   4    0.90    1.50
   0  -7   4  196.38    6.80
   0  -7   4  178.78    8.10
   0  -7  -4  193.58    8.30
   0  -7  -4  191.18    7.60
   0  -7  -4  186.68    7.70
   0  -7   4  182.98    8.70
   0  -7  -4  190.28    8.10
   0   7  -4  193.58    6.60
   0   7  -4  189.48    6.60
   0   7   4  204.68    7.90
   0   7   4  196.98    8.30
   0   7   4  192.48    7.90
  -1  -7  -4   31.60    3.80
  -1  -7  -4   26.50    3.40
   1  -7   4   30.80    4.10
  -1  -7  -4   19.90    3.10
   1  -7   4   24.90    3.50
  -1  -7  -4   21.40    2.90
   1   7   4   27.10    3.40
   1   7   4   30.20    3.80
   1   7   4   22.70    3.30
   2  -7   4   20.10    3.60
  -2  -7  -4   14.80    2.80
  -2  -7  -4   13.50    2.90
   2  -7   4   14.30    3.10
  -2  -7  -4   16.00    2.90
  -2  -7  -4   19.20    3.10
   2   7   4   19.80    3.50
   2   7   4   15.10    2.80
   2   7   4   17.40    2.80
  -3  -7  -4   21.20    3.60
  -3  -7  -4   29.70    3.80
  -3  -7  -4   34.40    4.40
  -3  -7  -4   25.60    3.30
  -3  -7  -4   24.80    3.40
   3  -7   4   17.70    3.40
   3   7   4   39.60    5.20
   3   7   4   38.10    4.80
   3   7   4   30.40    4.10
  -4  -7  -4    9.80    3.00
  -4  -7  -4    8.20    2.60
   4  -7   4   10.50    3.20
  -4  -7  -4    8.50    3.00
  -4  -7  -4    9.20    2.50
   4  -7   4    7.10    1.70
  -4  -7  -4    6.80    2.20
   4   7   4    6.60    2.60
   4   7   4    9.40    2.90
  -4   7  -4    7.50    1.70
   4   7   4    8.40    3.00
   5  -7   4   56.59    4.00
  -5  -7  -4   49.90    5.70
  -5  -7  -4   63.19    6.80
   5  -7   4   65.59    7.00
  -5  -7  -4   60.59    5.90
  -5   7  -4   51.99    3.70
   5   7   4   56.19    6.70
  -5   7  -4   62.19    3.90
   5   7   4   61.49    6.70
   5   7   4   56.79    6.10
  -6  -7  -4    0.50    2.20
  -6  -7  -4   -0.60    2.50
   6  -7   4    3.00    2.00
   6  -7   4    3.10    2.70
  -6   7  -4    0.50    1.70
   6   7   4   -0.40    2.30
   6   7   4   -2.90    2.10
   6   7   4    0.40    2.20
   7  -7   4    4.20    2.40
  -7  -7  -4    5.00    3.20
  -7  -7  -4    2.30    3.30
  -7   7  -4    8.30    2.60
   7   7   4    5.60    3.70
   8  -7   4  103.99    7.20
  -8  -7  -4   94.39    9.10
  -8  -7  -4   96.89    9.40
  -8   7  -4  114.19   10.30
  -8   7  -4  104.39    6.80
   8   7   4  104.39   10.00
   9  -7   4    4.90    3.30
  -9  -7  -4    9.60    5.30
  -9  -7  -4    0.30    3.40
   9   7   4    2.30    3.60
  -9   7  -4    3.10    2.90
  -9   7  -4    4.60    3.60
  10  -7   4    5.10    4.00
 -10  -7  -4    6.70    5.00
 -10   7  -4    5.90    3.50
  10   7   4    6.90    4.80
 -10   7  -4   13.70    5.10
 -11  -7  -4   -0.60    4.50
  11  -7   4    6.30    5.00
 -11   7  -4   -2.50    4.10
  11   7   4    1.70    3.80
 -11   7  -4    3.40    3.60
  12  -7   4    0.60    4.90
 -12   7  -4    0.00    3.50
 -12   7  -4   -3.50    4.00
  12   7   4   -0.20    4.10
  12  -8  -4    4.00    5.10
 -12  -8   4   -2.00    3.80
 -12   8   4    2.00    4.30
  12   8  -4   -3.70    4.70
 -11  -8   4   34.40    7.20
  11  -8  -4   14.30    5.10
 -11   8   4   27.50    6.30
  11   8  -4   13.00    5.60
  10  -8  -4    3.30    4.00
 -10  -8   4   11.00    5.00
  10   8  -4   13.80    5.40
 -10   8   4   14.40    4.30
  -9  -8   4   16.90    5.50
   9  -8  -4    4.70    3.50
   9   8  -4    1.90    4.20
  -9   8   4   -0.40    2.90
   8  -8  -4    4.70    3.10
  -8  -8   4    0.60    3.30
   8   8  -4    1.80    3.30
  -8   8   4    5.90    2.80
   8   8  -4    7.50    3.90
  -7  -8   4   14.90    3.90
[truncated: 897,129 more chars]
