# Supplementary material
Source: MDPI journal article supplement (https://www.mdpi.com/2624-8549/1/1/9)
Supplement: s1 [file s1 › 2_final CCDC 1935230.cif]

 
data_CAN_2
 
_audit_creation_method            'SHELXL-2017/1'
_chemical_name_systematic
;
 ?
;
_chemical_name_common             ?
_chemical_melting_point           ?
_chemical_formula_moiety          ?
_chemical_formula_sum
 'C27 H22 Co N2 O5' 
_chemical_formula_weight          513.39

loop_
 _atom_type_symbol
 _atom_type_description
 _atom_type_scat_dispersion_real
 _atom_type_scat_dispersion_imag
 _atom_type_scat_source
 'C'  'C'   0.0033   0.0016
 'International Tables Vol C Tables 4.2.6.8 and 6.1.1.4'
 'H'  'H'   0.0000   0.0000
 'International Tables Vol C Tables 4.2.6.8 and 6.1.1.4'
 'N'  'N'   0.0061   0.0033
 'International Tables Vol C Tables 4.2.6.8 and 6.1.1.4'
 'O'  'O'   0.0106   0.0060
 'International Tables Vol C Tables 4.2.6.8 and 6.1.1.4'
 'Co'  'Co'   0.3494   0.9721
 'International Tables Vol C Tables 4.2.6.8 and 6.1.1.4'
 
_space_group_crystal_system       monoclinic
_space_group_IT_number            14
_space_group_name_H-M_alt         'P 21/c'
_space_group_name_Hall            '-P 2ybc'
 
_shelx_space_group_comment
;
The symmetry employed for this shelxl refinement is uniquely defined
by the following loop, which should always be used as a source of
symmetry information in preference to the above space-group names.
They are only intended as comments.
;
 
loop_
 _space_group_symop_operation_xyz
 'x, y, z'
 '-x, y+1/2, -z+1/2'
 '-x, -y, -z'
 'x, -y-1/2, z-1/2'
 
_cell_length_a                    10.068(4)
_cell_length_b                    15.632(5)
_cell_length_c                    15.399(5)
_cell_angle_alpha                 90
_cell_angle_beta                  98.588(7)
_cell_angle_gamma                 90
_cell_volume                      2396.4(14)
_cell_formula_units_Z             4
_cell_measurement_temperature     100(2)
_cell_measurement_reflns_used     18219
_cell_measurement_theta_min       1.867
_cell_measurement_theta_max       25.088
 
_exptl_crystal_description        block 
_exptl_crystal_colour             red
_exptl_crystal_density_meas       none
_exptl_crystal_density_method     'not measured'              
_exptl_crystal_density_diffrn     1.423          
_exptl_crystal_F_000              1060
_exptl_transmission_factor_min    0.934                                            
_exptl_transmission_factor_max    0.978                                         
_exptl_crystal_size_max           0.090
_exptl_crystal_size_mid           0.060
_exptl_crystal_size_min           0.030
_exptl_absorpt_coefficient_mu     0.757
_shelx_estimated_absorpt_T_min    ? 
_shelx_estimated_absorpt_T_max    ? 
_exptl_absorpt_correction_type    multi-scan
_exptl_absorpt_correction_T_min   ? 
_exptl_absorpt_correction_T_max   ? 
_exptl_absorpt_process_details    'SADABS; Sheldrick, 1996'
 
_exptl_special_details
;
 ?
;
 
_diffrn_ambient_temperature       100(2)
_diffrn_radiation_wavelength      0.71073
_diffrn_radiation_type            MoK\a
_diffrn_source                    'fine-focus sealed tube'                       
_diffrn_measurement_device_type   'Bruker Kappa Duo Apex II diffractometer'
_diffrn_measurement_method        '1.2\% \f scans and \w scans'
_diffrn_detector_area_resol_mean  ? 
_diffrn_reflns_number             18219
_diffrn_reflns_av_unetI/netI      0.0903
_diffrn_reflns_av_R_equivalents   0.0974
_diffrn_reflns_limit_h_min        -11
_diffrn_reflns_limit_h_max        11
_diffrn_reflns_limit_k_min        -18
_diffrn_reflns_limit_k_max        18
_diffrn_reflns_limit_l_min        -18
_diffrn_reflns_limit_l_max        18
_diffrn_reflns_theta_min          1.867
_diffrn_reflns_theta_max          25.088
_diffrn_reflns_theta_full         25.242
_diffrn_measured_fraction_theta_max   0.997
_diffrn_measured_fraction_theta_full  0.979
_diffrn_reflns_Laue_measured_fraction_max    0.997
_diffrn_reflns_Laue_measured_fraction_full   0.979
_diffrn_reflns_point_group_measured_fraction_max   0.997
_diffrn_reflns_point_group_measured_fraction_full  0.979
_reflns_number_total              4250
_reflns_number_gt                 2860
_reflns_threshold_expression      'I > 2\s(I)'
_reflns_Friedel_coverage          0.000
_reflns_Friedel_fraction_max      .
_reflns_Friedel_fraction_full     .
 
_reflns_special_details
;
 Reflections were merged by SHELXL according to the crystal
 class for the calculation of statistics and refinement.
 
 _reflns_Friedel_fraction is defined as the number of unique
 Friedel pairs measured divided by the number that would be
 possible theoretically, ignoring centric projections and
 systematic absences.
;
 
_computing_data_collection        'APEX2 (Bruker, 2005)'
_computing_cell_refinement        'SAINT-Plus (Bruker, 2004)'
_computing_data_reduction         'SAINT-Plus and XPREP (Bruker 2004)'
_computing_structure_solution     'SHELXT 2014/5 (Sheldrick, 2014)'
_computing_structure_refinement   'SHELXL-2017/1 (Sheldrick, 2017)'
_computing_molecular_graphics     'X-seed (Barbour, 1999)'
_computing_publication_material   'SHELXL-97 (Sheldrick, 1997)'
 
_refine_special_details
;
 ?
;
_refine_ls_structure_factor_coef  Fsqd
_refine_ls_matrix_type            full
_refine_ls_weighting_scheme       calc
_refine_ls_weighting_details
'w=1/[\s^2^(Fo^2^)+(0.0543P)^2^+0.2426P] where P=(Fo^2^+2Fc^2^)/3'
_atom_sites_solution_primary      ?
_atom_sites_solution_secondary    ?
_atom_sites_solution_hydrogens    geom
_refine_ls_hydrogen_treatment     constr
_refine_ls_extinction_method      none
_refine_ls_extinction_coef        .
_refine_ls_number_reflns          4250
_refine_ls_number_parameters      318
_refine_ls_number_restraints      0
_refine_ls_R_factor_all           0.0899
_refine_ls_R_factor_gt            0.0493
_refine_ls_wR_factor_ref          0.1248
_refine_ls_wR_factor_gt           0.1099
_refine_ls_goodness_of_fit_ref    1.024
_refine_ls_restrained_S_all       1.024
_refine_ls_shift/su_max           0.007
_refine_ls_shift/su_mean          0.000
 
loop_
 _atom_site_label
 _atom_site_type_symbol
 _atom_site_fract_x
 _atom_site_fract_y
 _atom_site_fract_z
 _atom_site_U_iso_or_equiv
 _atom_site_adp_type
 _atom_site_occupancy
 _atom_site_site_symmetry_order  
 _atom_site_calc_flag
 _atom_site_refinement_flags_posn
 _atom_site_refinement_flags_adp
 _atom_site_refinement_flags_occupancy
 _atom_site_disorder_assembly
 _atom_site_disorder_group
Co1 Co 0.63904(5) 0.58460(3) 0.96952(3) 0.01171(16) Uani 1 1 d . . . . .
O1A O 0.4679(3) 0.95926(17) 1.39925(15) 0.0167(6) Uani 1 1 d . . . . .
N1A N 0.5211(3) 0.6655(2) 1.03986(18) 0.0152(7) Uani 1 1 d . . . . .
C1A C 0.3441(4) 0.9713(2) 1.3791(2) 0.0135(9) Uani 1 1 d . . . . .
O2A O 0.2766(3) 1.02240(16) 1.41924(14) 0.0158(6) Uani 1 1 d . . . . .
C2A C 0.2709(4) 0.9250(2) 1.3008(2) 0.0152(9) Uani 1 1 d . . . . .
C3A C 0.3417(4) 0.8694(2) 1.2545(2) 0.0173(9) Uani 1 1 d . . . . .
H3A H 0.4323 0.8594 1.2743 0.021 Uiso 1 1 calc R U . . .
C4A C 0.2800(4) 0.8284(3) 1.1792(2) 0.0192(9) Uani 1 1 d . . . . .
C5A C 0.1430(4) 0.8432(3) 1.1515(3) 0.0307(11) Uani 1 1 d . . . . .
H5A H 0.0998 0.8165 1.1011 0.037 Uiso 1 1 calc R U . . .
C6A C 0.0718(5) 0.8972(3) 1.1985(3) 0.0336(12) Uani 1 1 d . . . . .
H6A H -0.0194 0.9059 1.1801 0.040 Uiso 1 1 calc R U . . .
C7A C 0.1352(4) 0.9385(3) 1.2730(3) 0.0254(10) Uani 1 1 d . . . . .
H7A H 0.0869 0.9752 1.3041 0.031 Uiso 1 1 calc R U . . .
C8A C 0.3590(4) 0.7703(2) 1.1307(2) 0.0169(9) Uani 1 1 d . . . . .
C9A C 0.4569(4) 0.7167(3) 1.1744(2) 0.0198(9) Uani 1 1 d . . . . .
H9A H 0.4702 0.7145 1.2355 0.024 Uiso 1 1 calc R U . . .
C10A C 0.5346(4) 0.6667(2) 1.1278(2) 0.0176(9) Uani 1 1 d . . . . .
H10A H 0.6000 0.6320 1.1590 0.021 Uiso 1 1 calc R U . . .
C11A C 0.4245(4) 0.7167(3) 0.9973(2) 0.0218(10) Uani 1 1 d . . . . .
H11A H 0.4121 0.7168 0.9363 0.026 Uiso 1 1 calc R U . . .
C12A C 0.3438(4) 0.7687(3) 1.0388(2) 0.0240(10) Uani 1 1 d . . . . .
H12A H 0.2791 0.8027 1.0059 0.029 Uiso 1 1 calc R U . . .
O1B O 1.3447(3) 0.17909(17) 0.63054(15) 0.0177(6) Uani 1 1 d . . . . .
N1B N 0.7431(3) 0.4973(2) 0.89611(18) 0.0152(7) Uani 1 1 d . . . . .
C1B C 1.2256(4) 0.1955(2) 0.5952(2) 0.0165(9) Uani 1 1 d . . . . .
O2B O 1.1810(3) 0.16765(17) 0.51957(15) 0.0218(7) Uani 1 1 d . . . . .
C2B C 1.1367(4) 0.2457(3) 0.6460(2) 0.0182(9) Uani 1 1 d . . . . .
C3B C 1.1827(4) 0.2705(3) 0.7312(2) 0.0258(10) Uani 1 1 d . . . . .
H3B H 1.2689 0.2547 0.7566 0.031 Uiso 1 1 calc R U . . .
C4B C 1.1051(4) 0.3175(3) 0.7793(2) 0.0265(11) Uani 1 1 d . . . . .
H4B H 1.1399 0.3336 0.8363 0.032 Uiso 1 1 calc R U . . .
C5B C 0.9743(4) 0.3417(2) 0.7443(2) 0.0166(9) Uani 1 1 d . . . . .
C6B C 0.9260(5) 0.3131(3) 0.6599(2) 0.0335(12) Uani 1 1 d . . . . .
H6B H 0.8383 0.3263 0.6352 0.040 Uiso 1 1 calc R U . . .
C7B C 1.0055(5) 0.2655(3) 0.6116(2) 0.0344(12) Uani 1 1 d . . . . .
H7B H 0.9702 0.2467 0.5556 0.041 Uiso 1 1 calc R U . . .
C8B C 0.8915(4) 0.3928(2) 0.7956(2) 0.0148(9) Uani 1 1 d . . . . .
C9B C 0.9210(4) 0.3979(3) 0.8873(2) 0.0207(10) Uani 1 1 d . . . . .
H9B H 0.9914 0.3660 0.9171 0.025 Uiso 1 1 calc R U . . .
C10B C 0.8465(4) 0.4497(2) 0.9330(2) 0.0190(9) Uani 1 1 d . . . . .
H10B H 0.8695 0.4520 0.9937 0.023 Uiso 1 1 calc R U . . .
C11B C 0.7132(4) 0.4919(3) 0.8080(2) 0.0189(9) Uani 1 1 d . . . . .
H11B H 0.6412 0.5239 0.7803 0.023 Uiso 1 1 calc R U . . .
C12B C 0.7824(4) 0.4420(2) 0.7568(2) 0.0181(9) Uani 1 1 d . . . . .
H12B H 0.7569 0.4408 0.6962 0.022 Uiso 1 1 calc R U . . .
O1C O 0.6885(5) 0.4716(2) 0.5316(2) 0.0802(16) Uani 1 1 d . . . . .
C1C C 0.6817(7) 0.5411(4) 0.5005(4) 0.0628(18) Uani 1 1 d . . . . .
C2C C 0.6882(7) 0.6192(4) 0.5612(4) 0.078(2) Uani 1 1 d . . . . .
H4C H 0.7160 0.6014 0.6208 0.116 Uiso 1 1 calc R U . . .
H5C H 0.6011 0.6453 0.5561 0.116 Uiso 1 1 calc R U . . .
H6C H 0.7517 0.6596 0.5447 0.116 Uiso 1 1 calc R U . . .
C3C C 0.6402(8) 0.5595(4) 0.4059(3) 0.078(2) Uani 1 1 d . . . . .
H2C H 0.7172 0.5771 0.3803 0.117 Uiso 1 1 calc R U . . .
H3C H 0.5746 0.6045 0.3994 0.117 Uiso 1 1 calc R U . . .
H1C H 0.6022 0.5090 0.3768 0.117 Uiso 1 1 calc R U . . .
 
loop_
 _atom_site_aniso_label
 _atom_site_aniso_U_11
 _atom_site_aniso_U_22
 _atom_site_aniso_U_33
 _atom_site_aniso_U_23
 _atom_site_aniso_U_13
 _atom_site_aniso_U_12
Co1 0.0138(3) 0.0111(3) 0.0108(2) 0.0008(2) 0.00375(19) -0.0003(3)
O1A 0.0135(16) 0.0183(16) 0.0173(13) -0.0024(11) -0.0010(12) 0.0000(12)
N1A 0.019(2) 0.0124(18) 0.0149(15) -0.0010(13) 0.0039(14) -0.0038(15)
C1A 0.021(2) 0.008(2) 0.0122(16) 0.0059(15) 0.0071(17) -0.0009(18)
O2A 0.0179(16) 0.0161(15) 0.0141(12) -0.0022(11) 0.0050(11) 0.0018(12)
C2A 0.019(2) 0.012(2) 0.0152(17) -0.0027(16) 0.0032(16) 0.0023(18)
C3A 0.013(2) 0.021(2) 0.0176(18) 0.0024(17) 0.0011(17) -0.0029(18)
C4A 0.021(2) 0.019(2) 0.0180(18) -0.0060(17) 0.0049(17) 0.000(2)
C5A 0.021(3) 0.040(3) 0.028(2) -0.018(2) -0.0044(19) 0.005(2)
C6A 0.020(3) 0.042(3) 0.037(2) -0.019(2) -0.004(2) 0.008(2)
C7A 0.020(3) 0.030(3) 0.027(2) -0.0118(18) 0.0042(19) 0.007(2)
C8A 0.016(2) 0.016(2) 0.0189(18) -0.0041(17) 0.0032(17) -0.0031(18)
C9A 0.025(3) 0.020(2) 0.0148(18) -0.0034(17) 0.0051(18) 0.002(2)
C10A 0.023(2) 0.015(2) 0.0144(18) -0.0012(16) 0.0011(17) 0.0025(19)
C11A 0.028(3) 0.023(2) 0.0143(18) -0.0048(17) 0.0018(18) 0.006(2)
C12A 0.025(3) 0.024(3) 0.0198(19) -0.0041(18) -0.0041(19) 0.006(2)
O1B 0.0169(17) 0.0192(16) 0.0175(13) -0.0041(11) 0.0045(12) 0.0027(13)
N1B 0.0166(19) 0.0155(19) 0.0134(14) -0.0017(13) 0.0018(13) 0.0000(15)
C1B 0.021(3) 0.012(2) 0.0173(19) -0.0006(16) 0.0028(18) -0.0001(18)
O2B 0.0233(17) 0.0257(17) 0.0162(13) -0.0056(12) 0.0023(12) 0.0047(14)
C2B 0.022(2) 0.015(2) 0.0175(19) -0.0012(16) 0.0025(17) -0.0001(19)
C3B 0.016(2) 0.037(3) 0.022(2) -0.0107(19) -0.0006(18) 0.008(2)
C4B 0.021(3) 0.041(3) 0.0167(19) -0.0092(19) -0.0002(18) 0.007(2)
C5B 0.016(2) 0.017(2) 0.0174(18) -0.0020(16) 0.0029(17) 0.0059(18)
C6B 0.030(3) 0.044(3) 0.024(2) -0.012(2) -0.007(2) 0.019(2)
C7B 0.029(3) 0.058(3) 0.0139(19) -0.013(2) -0.0046(19) 0.017(3)
C8B 0.013(2) 0.014(2) 0.0173(18) -0.0028(15) 0.0027(17) -0.0014(17)
C9B 0.016(2) 0.025(3) 0.0205(19) -0.0010(17) -0.0005(17) 0.0029(19)
C10B 0.025(3) 0.017(2) 0.0152(18) -0.0018(16) 0.0034(18) 0.0057(19)
C11B 0.018(2) 0.021(2) 0.0180(19) -0.0002(16) 0.0024(17) 0.0022(19)
C12B 0.020(2) 0.020(2) 0.0142(17) -0.0026(16) 0.0040(17) 0.0014(19)
O1C 0.160(5) 0.031(2) 0.050(2) 0.0057(19) 0.020(3) 0.010(3)
C1C 0.090(5) 0.032(3) 0.061(3) 0.011(3) -0.008(3) -0.009(3)
C2C 0.092(6) 0.051(4) 0.082(4) -0.007(4) -0.012(4) 0.010(4)
C3C 0.140(7) 0.050(4) 0.048(3) 0.000(3) 0.029(4) -0.020(4)
 
_geom_special_details
;
 All esds (except the esd in the dihedral angle between two l.s. planes)
 are estimated using the full covariance matrix.  The cell esds are taken
 into account individually in the estimation of esds in distances, angles
 and torsion angles; correlations between esds in cell parameters are only
 used when they are defined by crystal symmetry.  An approximate (isotropic)
 treatment of cell esds is used for estimating esds involving l.s. planes.
;
 
loop_
 _geom_bond_atom_site_label_1
 _geom_bond_atom_site_label_2
 _geom_bond_distance
 _geom_bond_site_symmetry_2
 _geom_bond_publ_flag
Co1 O1A 2.013(3) 4_575 ?
Co1 O2A 2.041(2) 2_647 ?
Co1 N1A 2.137(3) . ?
Co1 N1B 2.143(3) . ?
Co1 O1B 2.158(2) 2_756 ?
Co1 O2B 2.215(3) 2_756 ?
O1A C1A 1.253(5) . ?
O1A Co1 2.013(3) 4_576 ?
N1A C10A 1.340(4) . ?
N1A C11A 1.351(5) . ?
C1A O2A 1.268(4) . ?
C1A C2A 1.502(5) . ?
O2A Co1 2.041(2) 2_657 ?
C2A C7A 1.385(6) . ?
C2A C3A 1.387(5) . ?
C3A C4A 1.388(5) . ?
C3A H3A 0.9300 . ?
C4A C5A 1.401(6) . ?
C4A C8A 1.480(5) . ?
C5A C6A 1.381(6) . ?
C5A H5A 0.9300 . ?
C6A C7A 1.386(6) . ?
C6A H6A 0.9300 . ?
C7A H7A 0.9300 . ?
C8A C9A 1.389(5) . ?
C8A C12A 1.401(5) . ?
C9A C10A 1.382(5) . ?
C9A H9A 0.9300 . ?
C10A H10A 0.9300 . ?
C11A C12A 1.372(6) . ?
C11A H11A 0.9300 . ?
C12A H12A 0.9300 . ?
O1B C1B 1.267(5) . ?
O1B Co1 2.158(2) 2_746 ?
N1B C10B 1.335(5) . ?
N1B C11B 1.348(4) . ?
C1B O2B 1.261(4) . ?
C1B C2B 1.496(5) . ?
C1B Co1 2.502(4) 2_746 ?
O2B Co1 2.215(3) 2_746 ?
C2B C3B 1.380(5) . ?
C2B C7B 1.383(6) . ?
C3B C4B 1.368(5) . ?
C3B H3B 0.9300 . ?
C4B C5B 1.399(6) . ?
C4B H4B 0.9300 . ?
C5B C6B 1.392(5) . ?
C5B C8B 1.468(5) . ?
C6B C7B 1.387(6) . ?
C6B H6B 0.9300 . ?
C7B H7B 0.9300 . ?
C8B C12B 1.400(5) . ?
C8B C9B 1.400(5) . ?
C9B C10B 1.368(5) . ?
C9B H9B 0.9300 . ?
C10B H10B 0.9300 . ?
C11B C12B 1.371(5) . ?
C11B H11B 0.9300 . ?
C12B H12B 0.9300 . ?
O1C C1C 1.185(6) . ?
C1C C3C 1.483(7) . ?
C1C C2C 1.532(8) . ?
C2C H4C 0.9600 . ?
C2C H5C 0.9600 . ?
C2C H6C 0.9600 . ?
C3C H2C 0.9600 . ?
C3C H3C 0.9600 . ?
C3C H1C 0.9600 . ?
 
loop_
 _geom_angle_atom_site_label_1
 _geom_angle_atom_site_label_2
 _geom_angle_atom_site_label_3
 _geom_angle
 _geom_angle_site_symmetry_1
 _geom_angle_site_symmetry_3
 _geom_angle_publ_flag
O1A Co1 O2A 120.29(10) 4_575 2_647 ?
O1A Co1 N1A 88.74(12) 4_575 . ?
O2A Co1 N1A 92.85(11) 2_647 . ?
O1A Co1 N1B 86.92(12) 4_575 . ?
O2A Co1 N1B 87.95(11) 2_647 . ?
N1A Co1 N1B 175.37(13) . . ?
O1A Co1 O1B 89.98(10) 4_575 2_756 ?
O2A Co1 O1B 149.15(11) 2_647 2_756 ?
N1A Co1 O1B 93.67(11) . 2_756 ?
N1B Co1 O1B 87.94(11) . 2_756 ?
O1A Co1 O2B 149.91(9) 4_575 2_756 ?
O2A Co1 O2B 88.98(10) 2_647 2_756 ?
N1A Co1 O2B 97.17(11) . 2_756 ?
N1B Co1 O2B 87.40(11) . 2_756 ?
O1B Co1 O2B 60.30(10) 2_756 2_756 ?
C1A O1A Co1 157.5(2) . 4_576 ?
C10A N1A C11A 116.0(3) . . ?
C10A N1A Co1 122.7(3) . . ?
C11A N1A Co1 121.3(2) . . ?
O1A C1A O2A 124.0(3) . . ?
O1A C1A C2A 118.5(3) . . ?
O2A C1A C2A 117.4(4) . . ?
C1A O2A Co1 121.5(2) . 2_657 ?
C7A C2A C3A 119.7(3) . . ?
C7A C2A C1A 121.2(3) . . ?
C3A C2A C1A 119.1(4) . . ?
C2A C3A C4A 121.2(4) . . ?
C2A C3A H3A 119.4 . . ?
C4A C3A H3A 119.4 . . ?
C3A C4A C5A 118.4(4) . . ?
C3A C4A C8A 119.9(4) . . ?
C5A C4A C8A 121.7(3) . . ?
C6A C5A C4A 120.4(4) . . ?
C6A C5A H5A 119.8 . . ?
C4A C5A H5A 119.8 . . ?
C5A C6A C7A 120.5(4) . . ?
C5A C6A H6A 119.7 . . ?
C7A C6A H6A 119.7 . . ?
C2A C7A C6A 119.7(4) . . ?
C2A C7A H7A 120.1 . . ?
C6A C7A H7A 120.1 . . ?
C9A C8A C12A 116.2(3) . . ?
C9A C8A C4A 121.4(3) . . ?
C12A C8A C4A 122.4(4) . . ?
C10A C9A C8A 120.3(3) . . ?
C10A C9A H9A 119.8 . . ?
C8A C9A H9A 119.8 . . ?
N1A C10A C9A 123.6(4) . . ?
N1A C10A H10A 118.2 . . ?
C9A C10A H10A 118.2 . . ?
N1A C11A C12A 124.0(3) . . ?
N1A C11A H11A 118.0 . . ?
C12A C11A H11A 118.0 . . ?
C11A C12A C8A 119.9(4) . . ?
C11A C12A H12A 120.1 . . ?
C8A C12A H12A 120.1 . . ?
C1B O1B Co1 90.0(2) . 2_746 ?
C10B N1B C11B 115.8(3) . . ?
C10B N1B Co1 122.8(2) . . ?
C11B N1B Co1 121.2(3) . . ?
O2B C1B O1B 120.7(3) . . ?
O2B C1B C2B 120.4(4) . . ?
O1B C1B C2B 118.9(3) . . ?
O2B C1B Co1 62.2(2) . 2_746 ?
O1B C1B Co1 59.60(19) . 2_746 ?
C2B C1B Co1 167.3(3) . 2_746 ?
C1B O2B Co1 87.6(2) . 2_746 ?
C3B C2B C7B 117.8(4) . . ?
C3B C2B C1B 120.1(4) . . ?
C7B C2B C1B 122.0(3) . . ?
C4B C3B C2B 121.8(4) . . ?
C4B C3B H3B 119.1 . . ?
C2B C3B H3B 119.1 . . ?
C3B C4B C5B 121.2(4) . . ?
C3B C4B H4B 119.4 . . ?
C5B C4B H4B 119.4 . . ?
C6B C5B C4B 116.8(4) . . ?
C6B C5B C8B 122.0(4) . . ?
C4B C5B C8B 121.2(3) . . ?
C7B C6B C5B 121.6(4) . . ?
C7B C6B H6B 119.2 . . ?
C5B C6B H6B 119.2 . . ?
C2B C7B C6B 120.6(4) . . ?
C2B C7B H7B 119.7 . . ?
C6B C7B H7B 119.7 . . ?
C12B C8B C9B 115.8(3) . . ?
C12B C8B C5B 122.7(3) . . ?
C9B C8B C5B 121.4(3) . . ?
C10B C9B C8B 120.1(4) . . ?
C10B C9B H9B 120.0 . . ?
C8B C9B H9B 120.0 . . ?
N1B C10B C9B 124.3(3) . . ?
N1B C10B H10B 117.8 . . ?
C9B C10B H10B 117.8 . . ?
N1B C11B C12B 124.0(4) . . ?
N1B C11B H11B 118.0 . . ?
C12B C11B H11B 118.0 . . ?
C11B C12B C8B 120.0(3) . . ?
C11B C12B H12B 120.0 . . ?
C8B C12B H12B 120.0 . . ?
O1C C1C C3C 124.4(5) . . ?
O1C C1C C2C 119.3(5) . . ?
C3C C1C C2C 115.1(5) . . ?
C1C C2C H4C 109.5 . . ?
C1C C2C H5C 109.5 . . ?
H4C C2C H5C 109.5 . . ?
C1C C2C H6C 109.5 . . ?
H4C C2C H6C 109.5 . . ?
H5C C2C H6C 109.5 . . ?
C1C C3C H2C 109.5 . . ?
C1C C3C H3C 109.5 . . ?
H2C C3C H3C 109.5 . . ?
C1C C3C H1C 109.5 . . ?
H2C C3C H1C 109.5 . . ?
H3C C3C H1C 109.5 . . ?
 
loop_
 _geom_torsion_atom_site_label_1
 _geom_torsion_atom_site_label_2
 _geom_torsion_atom_site_label_3
 _geom_torsion_atom_site_label_4
 _geom_torsion
 _geom_torsion_site_symmetry_1
 _geom_torsion_site_symmetry_2
 _geom_torsion_site_symmetry_3
 _geom_torsion_site_symmetry_4
 _geom_torsion_publ_flag
Co1 O1A C1A O2A 74.1(8) 4_576 . . . ?
Co1 O1A C1A C2A -108.1(6) 4_576 . . . ?
O1A C1A O2A Co1 -5.5(5) . . . 2_657 ?
C2A C1A O2A Co1 176.6(2) . . . 2_657 ?
O1A C1A C2A C7A -177.1(4) . . . . ?
O2A C1A C2A C7A 0.8(5) . . . . ?
O1A C1A C2A C3A 1.2(5) . . . . ?
O2A C1A C2A C3A 179.1(3) . . . . ?
C7A C2A C3A C4A 1.6(6) . . . . ?
C1A C2A C3A C4A -176.7(3) . . . . ?
C2A C3A C4A C5A -1.1(6) . . . . ?
C2A C3A C4A C8A 179.2(3) . . . . ?
C3A C4A C5A C6A -0.2(7) . . . . ?
C8A C4A C5A C6A 179.5(4) . . . . ?
C4A C5A C6A C7A 1.0(7) . . . . ?
C3A C2A C7A C6A -0.8(6) . . . . ?
C1A C2A C7A C6A 177.5(4) . . . . ?
C5A C6A C7A C2A -0.5(7) . . . . ?
C3A C4A C8A C9A 38.1(6) . . . . ?
C5A C4A C8A C9A -141.6(4) . . . . ?
C3A C4A C8A C12A -139.1(4) . . . . ?
C5A C4A C8A C12A 41.2(6) . . . . ?
C12A C8A C9A C10A 1.1(6) . . . . ?
C4A C8A C9A C10A -176.2(4) . . . . ?
C11A N1A C10A C9A -0.2(6) . . . . ?
Co1 N1A C10A C9A -178.1(3) . . . . ?
C8A C9A C10A N1A -0.7(6) . . . . ?
C10A N1A C11A C12A 0.7(6) . . . . ?
Co1 N1A C11A C12A 178.6(3) . . . . ?
N1A C11A C12A C8A -0.2(7) . . . . ?
C9A C8A C12A C11A -0.7(6) . . . . ?
C4A C8A C12A C11A 176.6(4) . . . . ?
Co1 O1B C1B O2B -12.2(4) 2_746 . . . ?
Co1 O1B C1B C2B 165.5(3) 2_746 . . . ?
O1B C1B O2B Co1 11.9(4) . . . 2_746 ?
C2B C1B O2B Co1 -165.8(3) . . . 2_746 ?
O2B C1B C2B C3B 175.1(4) . . . . ?
O1B C1B C2B C3B -2.6(6) . . . . ?
Co1 C1B C2B C3B 77.0(14) 2_746 . . . ?
O2B C1B C2B C7B -2.0(6) . . . . ?
O1B C1B C2B C7B -179.7(4) . . . . ?
Co1 C1B C2B C7B -100.0(13) 2_746 . . . ?
C7B C2B C3B C4B -3.8(7) . . . . ?
C1B C2B C3B C4B 179.0(4) . . . . ?
C2B C3B C4B C5B 0.8(7) . . . . ?
C3B C4B C5B C6B 2.2(7) . . . . ?
C3B C4B C5B C8B -179.4(4) . . . . ?
C4B C5B C6B C7B -2.3(7) . . . . ?
C8B C5B C6B C7B 179.4(4) . . . . ?
C3B C2B C7B C6B 3.7(7) . . . . ?
C1B C2B C7B C6B -179.2(4) . . . . ?
C5B C6B C7B C2B -0.7(7) . . . . ?
C6B C5B C8B C12B -23.8(6) . . . . ?
C4B C5B C8B C12B 158.0(4) . . . . ?
C6B C5B C8B C9B 158.9(4) . . . . ?
C4B C5B C8B C9B -19.4(6) . . . . ?
C12B C8B C9B C10B -1.1(6) . . . . ?
C5B C8B C9B C10B 176.4(4) . . . . ?
C11B N1B C10B C9B 0.2(6) . . . . ?
Co1 N1B C10B C9B -175.2(3) . . . . ?
C8B C9B C10B N1B 0.6(6) . . . . ?
C10B N1B C11B C12B -0.4(6) . . . . ?
Co1 N1B C11B C12B 175.1(3) . . . . ?
N1B C11B C12B C8B -0.1(6) . . . . ?
C9B C8B C12B C11B 0.9(6) . . . . ?
C5B C8B C12B C11B -176.6(4) . . . . ?
 
loop_
 _geom_hbond_atom_site_label_D 
 _geom_hbond_atom_site_label_H 
 _geom_hbond_atom_site_label_A 
 _geom_hbond_distance_DH 
 _geom_hbond_distance_HA 
 _geom_hbond_distance_DA 
 _geom_hbond_angle_DHA 
 _geom_hbond_site_symmetry_A 
C9B H9B O2B  0.93 2.35 3.234(5) 159.3 4_566
C12B H12B O1C  0.93 2.57 3.486(5) 168.1 .
C12A H12A O1C  0.93 2.73 3.351(6) 124.9 2_656
C10A H10A O2A  0.93 2.53 3.104(5) 120.6 2_647
C10B H10B O2A  0.93 2.40 2.975(4) 119.9 2_647
 
_refine_diff_density_max    0.653
_refine_diff_density_min   -0.455
_refine_diff_density_rms    0.087

_shelxl_version_number 2014-3

_shelx_res_file
;
TITL a98
CELL 0.71073 10.0682 15.6318 15.3990 90.000 98.588 90.000
ZERR 4.0000 0.0036 0.0052 0.0047 0.000 0.007 0.000
LATT 1
SYMM -X, 0.5+Y, 0.5-Z
SFAC C H N O CO
UNIT 108 88 8 20 4
BOND $H
CONF
EQIV $1 2-X,1/2+Y,3/2-Z
EQIV $2 1-X,1/2+Y,3/2-Z
EQIV $3 X,1/2-Y,1/2+Z
EQIV $4 1-X,1-Y,2-Z
EQIV $5 1-X,Y-1/2,5/2-Z
FREE Co1 C1B_$1
HTAB C9B O2B_$3
HTAB C12B O1C
HTAB C12A O1C_$2
HTAB C10A O2A_$5
HTAB C10B O2A_$5
ACTA
FMAP 2 1 53
PLAN 20 0 0
HTAB 2.0
LIST 6 1
L.S. 10
WGHT    0.054300    0.242600
FVAR       0.29225
CO1   5    0.639040    0.584600    0.969516    11.00000    0.01378    0.01113 =
         0.01080    0.00084    0.00375   -0.00027
O1A   4    0.467875    0.959264    1.399253    11.00000    0.01349    0.01826 =
         0.01729   -0.00244   -0.00101    0.00000
N1A   3    0.521074    0.665507    1.039863    11.00000    0.01860    0.01245 =
         0.01492   -0.00102    0.00394   -0.00377
C1A   1    0.344067    0.971283    1.379098    11.00000    0.02145    0.00826 =
         0.01216    0.00587    0.00708   -0.00087
O2A   4    0.276561    1.022401    1.419240    11.00000    0.01788    0.01611 =
         0.01414   -0.00218    0.00504    0.00181
C2A   1    0.270855    0.924956    1.300823    11.00000    0.01871    0.01199 =
         0.01525   -0.00265    0.00322    0.00231
C3A   1    0.341748    0.869379    1.254548    11.00000    0.01330    0.02081 =
         0.01756    0.00241    0.00112   -0.00295
AFIX  43
H3A   2    0.432273    0.859407    1.274339    11.00000   -1.20000
AFIX   0
C4A   1    0.280019    0.828368    1.179223    11.00000    0.02097    0.01918 =
         0.01799   -0.00595    0.00490   -0.00024
C5A   1    0.142998    0.843200    1.151486    11.00000    0.02101    0.04047 =
         0.02831   -0.01787   -0.00436    0.00519
AFIX  43
H5A   2    0.099756    0.816521    1.101086    11.00000   -1.20000
AFIX   0
C6A   1    0.071813    0.897185    1.198538    11.00000    0.01951    0.04177 =
         0.03703   -0.01905   -0.00416    0.00791
AFIX  43
H6A   2   -0.019421    0.905895    1.180123    11.00000   -1.20000
AFIX   0
C7A   1    0.135204    0.938493    1.272976    11.00000    0.01993    0.03004 =
         0.02657   -0.01177    0.00418    0.00727
AFIX  43
H7A   2    0.086881    0.975159    1.304119    11.00000   -1.20000
AFIX   0
C8A   1    0.358956    0.770301    1.130680    11.00000    0.01596    0.01604 =
         0.01888   -0.00406    0.00315   -0.00314
C9A   1    0.456859    0.716739    1.174443    11.00000    0.02536    0.01989 =
         0.01482   -0.00335    0.00512    0.00220
AFIX  43
H9A   2    0.470151    0.714522    1.235477    11.00000   -1.20000
AFIX   0
C10A  1    0.534633    0.666718    1.127755    11.00000    0.02269    0.01525 =
         0.01444   -0.00115    0.00105    0.00249
AFIX  43
H10A  2    0.599965    0.631991    1.159048    11.00000   -1.20000
AFIX   0
C11A  1    0.424543    0.716746    0.997326    11.00000    0.02786    0.02281 =
         0.01431   -0.00479    0.00182    0.00556
AFIX  43
H11A  2    0.412090    0.716831    0.936256    11.00000   -1.20000
AFIX   0
C12A  1    0.343760    0.768670    1.038773    11.00000    0.02548    0.02431 =
         0.01984   -0.00408   -0.00408    0.00638
AFIX  43
H12A  2    0.279060    0.802706    1.005922    11.00000   -1.20000
AFIX   0
O1B   4    1.344671    0.179093    0.630537    11.00000    0.01691    0.01919 =
         0.01750   -0.00413    0.00451    0.00265
N1B   3    0.743121    0.497267    0.896109    11.00000    0.01656    0.01549 =
         0.01340   -0.00169    0.00177   -0.00004
C1B   1    1.225573    0.195505    0.595173    11.00000    0.02072    0.01161 =
         0.01726   -0.00061    0.00281   -0.00011
O2B   4    1.181037    0.167653    0.519566    11.00000    0.02334    0.02574 =
         0.01622   -0.00563    0.00227    0.00474
C2B   1    1.136662    0.245724    0.645981    11.00000    0.02167    0.01524 =
         0.01752   -0.00124    0.00246   -0.00011
C3B   1    1.182694    0.270455    0.731199    11.00000    0.01638    0.03744 =
         0.02247   -0.01071   -0.00055    0.00802
AFIX  43
H3B   2    1.268857    0.254733    0.756636    11.00000   -1.20000
AFIX   0
C4B   1    1.105073    0.317466    0.779304    11.00000    0.02113    0.04061 =
         0.01673   -0.00919   -0.00024    0.00745
AFIX  43
H4B   2    1.139920    0.333584    0.836298    11.00000   -1.20000
AFIX   0
C5B   1    0.974269    0.341721    0.744313    11.00000    0.01577    0.01686 =
         0.01739   -0.00201    0.00286    0.00595
C6B   1    0.925984    0.313144    0.659878    11.00000    0.02976    0.04381 =
         0.02355   -0.01206   -0.00680    0.01914
AFIX  43
H6B   2    0.838341    0.326292    0.635232    11.00000   -1.20000
AFIX   0
C7B   1    1.005454    0.265527    0.611616    11.00000    0.02911    0.05787 =
         0.01391   -0.01273   -0.00459    0.01710
AFIX  43
H7B   2    0.970152    0.246739    0.555607    11.00000   -1.20000
AFIX   0
C8B   1    0.891476    0.392829    0.795649    11.00000    0.01306    0.01432 =
         0.01726   -0.00276    0.00275   -0.00141
C9B   1    0.921021    0.397893    0.887267    11.00000    0.01555    0.02504 =
         0.02052   -0.00099   -0.00046    0.00289
AFIX  43
H9B   2    0.991387    0.365972    0.917114    11.00000   -1.20000
AFIX   0
C10B  1    0.846532    0.449730    0.932958    11.00000    0.02505    0.01686 =
         0.01520   -0.00176    0.00338    0.00567
AFIX  43
H10B  2    0.869458    0.451997    0.993698    11.00000   -1.20000
AFIX   0
C11B  1    0.713185    0.491856    0.808015    11.00000    0.01794    0.02066 =
         0.01796   -0.00016    0.00243    0.00215
AFIX  43
H11B  2    0.641245    0.523877    0.780308    11.00000   -1.20000
AFIX   0
C12B  1    0.782395    0.441986    0.756764    11.00000    0.02007    0.02038 =
         0.01415   -0.00265    0.00401    0.00139
AFIX  43
H12B  2    0.756859    0.440829    0.696189    11.00000   -1.20000
AFIX   0
O1C   4    0.688536    0.471560    0.531559    11.00000    0.16044    0.03145 =
         0.04996    0.00574    0.01973    0.00986
C1C   1    0.681674    0.541099    0.500532    11.00000    0.09006    0.03158 =
         0.06094    0.01081   -0.00765   -0.00881
C2C   1    0.688242    0.619155    0.561194    11.00000    0.09196    0.05095 =
         0.08211   -0.00715   -0.01212    0.01016
AFIX 137
H4C   2    0.716028    0.601435    0.620829    11.00000   -1.50000
H5C   2    0.601142    0.645296    0.556087    11.00000   -1.50000
H6C   2    0.751670    0.659643    0.544675    11.00000   -1.50000
AFIX   0
C3C   1    0.640243    0.559544    0.405898    11.00000    0.13957    0.05015 =
         0.04799    0.00033    0.02880   -0.01968
AFIX 137
H2C   2    0.717160    0.577092    0.380295    11.00000   -1.50000
H3C   2    0.574551    0.604503    0.399382    11.00000   -1.50000
H1C   2    0.602196    0.508977    0.376755    11.00000   -1.50000
AFIX   0
HKLF 4

REM  a98
REM R1 =  0.0493 for    2860 Fo > 4sig(Fo)  and  0.0899 for all    4250 data
REM    318 parameters refined using      0 restraints

END

WGHT      0.0530      0.3912

REM Instructions for potential hydrogen bonds
HTAB C10A O2A_$5
HTAB C9B O2B_$3
HTAB C10B O2A_$5
HTAB C12B O1C

REM Highest difference peak  0.653,  deepest hole -0.455,  1-sigma level  0.087
Q1    1   0.8543  0.5555  0.4853  11.00000  0.05    0.65
Q2    1   1.0537  0.3231  0.6015  11.00000  0.05    0.49
Q3    1   0.7129  0.5078  0.4621  11.00000  0.05    0.46
Q4    1   0.9726  0.3713  0.6597  11.00000  0.05    0.33
Q5    1   0.0966  0.7845  1.1168  11.00000  0.05    0.29
Q6    1   0.4825  0.6478  0.3784  11.00000  0.05    0.28
Q7    1   1.1783  0.1745  0.5580  11.00000  0.05    0.28
Q8    1   0.5986  1.0180  1.4281  11.00000  0.05    0.28
Q9    1   0.5152  0.8730  1.2649  11.00000  0.05    0.27
Q10   1   0.7474  0.5062  0.8568  11.00000  0.05    0.26
Q11   1   1.1452  0.4335  0.8507  11.00000  0.05    0.26
Q12   1   0.9340  0.3267  0.7220  11.00000  0.05    0.26
Q13   1   0.7569  0.5407  0.9412  11.00000  0.05    0.26
Q14   1   1.2056  0.2027  0.4841  11.00000  0.05    0.25
Q15   1   0.3204  0.9396  1.3455  11.00000  0.05    0.25
Q16   1   0.4770  0.7780  0.8800  11.00000  0.05    0.25
Q17   1   0.8718  0.4491  1.0229  11.00000  0.05    0.25
Q18   1   0.5440  0.6383  0.9941  11.00000  0.05    0.25
Q19   1   0.3938  0.5786  1.0637  11.00000  0.05    0.25
Q20   1   0.4854  0.4477  0.3968  11.00000  0.05    0.25
;
_shelx_res_checksum   15559

_shelx_hkl_file
;
   1   0   0  696.45   42.84
   2   0   0 1018.59   63.26
  -3   0   0  928.75   59.96
  -3   0   0  943.17   63.70
   3   0   0  956.07   59.95
  -4   0   0  596.78   45.81
  -4   0   0  683.30   44.22
   4   0   0  698.47   44.07
  -5   0   0  330.37   25.82
   5   0   0  300.12   25.42
  -6   0   0  532.32   35.56
   6   0   0  405.80   34.37
  -7   0   0  214.87   22.73
   7   0   0  248.56   24.59
   8   0   0  179.73   22.80
  -8   0   0  185.82   22.67
  -9   0   0   -6.85   11.30
   9   0   0   14.80   12.05
 -10   0   0  204.63   25.93
  10   0   0  243.43   28.24
  11   0   0  387.38   39.02
 -11   0   0  287.07   34.74
   0  -1   0   -1.84    1.24
   0  -1   0   -0.64    1.00
   0   1   0    0.46    1.40
   0   1   0    1.01    1.43
  -1  -1   0   73.93    6.43
  -1  -1   0   56.65    5.80
  -1  -1   0   65.16    6.16
   1  -1   0   65.24    6.28
   1   1   0   66.51    6.26
  -1   1   0   61.39    6.23
  -2  -1   0   22.87    5.77
   2  -1   0   30.56    6.14
  -2  -1   0   43.33    5.94
   2   1   0   26.46    5.88
  -2   1   0   31.43    6.36
   2   1   0   38.90    5.93
   3  -1   0  188.90   16.05
  -3  -1   0  148.97   15.77
  -3  -1   0  181.61   16.23
  -3   1   0  201.67   16.50
   3   1   0  183.98   15.57
  -4  -1   0  213.01   18.77
   4  -1   0  219.52   19.32
   4   1   0  217.27   19.57
  -4   1   0  200.69   19.21
  -5  -1   0  369.58   29.76
   5  -1   0  380.37   28.56
  -5  -1   0  389.54   29.42
   5   1   0  399.49   29.09
  -5   1   0  370.55   28.94
   6  -1   0  116.23   16.03
  -6  -1   0  108.13   14.73
  -6   1   0  151.05   16.80
   6   1   0   96.29   14.35
  -7  -1   0   15.27   10.55
   7  -1   0   12.49   10.11
   7   1   0   -3.59    9.60
  -7   1   0    9.01   10.01
   8  -1   0   39.23   13.00
  -8  -1   0   56.83   14.21
  -8   1   0   52.96   13.69
   8   1   0   64.99   15.22
  -9  -1   0   16.31   12.26
   9  -1   0   27.35   12.85
  -9   1   0   19.79   13.47
   9   1   0   30.66   13.32
  10  -1   0   24.00   14.33
 -10  -1   0    7.43   13.37
  10   1   0    4.19   13.40
 -10   1   0   14.01   14.48
  11  -1   0   41.92   16.70
 -11  -1   0   15.16   14.49
  11   1   0   34.82   15.90
 -11   1   0   16.19   14.10
   0  -2   0  115.17    9.54
   0  -2   0  121.17    8.97
   0   2   0  121.64    9.45
   0   2   0  106.24    9.22
  -1  -2   0  296.67   21.73
  -1  -2   0  309.50   20.88
  -1  -2   0  278.39   20.46
   1  -2   0  322.83   20.65
  -1   2   0  322.01   20.89
   1   2   0  302.07   20.78
   1   2   0  319.37   21.73
  -2  -2   0 1338.69   82.06
   2  -2   0 1351.63   82.29
  -2  -2   0 1291.36   88.01
   2   2   0 1291.67   82.25
  -2   2   0 1414.47   82.31
   2   2   0 1294.80   87.93
   3  -2   0  501.74   36.86
  -3  -2   0  542.24   39.27
  -3  -2   0  570.77   37.20
   3   2   0  565.28   37.53
  -3   2   0  568.02   37.41
   3   2   0  587.05   39.50
  -4  -2   0    3.46    5.38
   4  -2   0    4.14    7.37
  -4  -2   0    8.54    6.91
   4   2   0    2.64    5.50
  -4   2   0   -3.65    6.16
   4   2   0   -9.94    6.99
  -5  -2   0  176.69   18.62
   5  -2   0  222.58   19.65
  -5  -2   0  218.24   19.33
  -5   2   0  242.60   21.02
   5   2   0  218.64   20.29
  -6  -2   0   36.66   10.12
   6  -2   0   23.31    9.95
  -6   2   0   22.70    9.90
   6   2   0   22.58   10.22
   7  -2   0   -3.47    7.97
  -7  -2   0    1.34    9.09
   7   2   0   -1.56    9.10
  -7   2   0   10.19    9.88
   8  -2   0   73.53   15.36
  -8  -2   0   50.37   12.80
   8   2   0   44.77   14.61
  -8   2   0   79.89   15.89
   9  -2   0   39.13   14.50
  -9  -2   0   35.48   13.33
  -9   2   0   31.45   14.28
   9   2   0   35.32   14.49
 -10  -2   0   18.41   13.35
  10  -2   0   46.81   15.76
 -10   2   0   40.98   15.60
  10   2   0   -8.88   12.69
  11  -2   0    5.15   14.15
 -11  -2   0    0.17   13.31
 -11   2   0  -13.29   13.42
  11   2   0   17.36   15.91
   0  -3   0   -3.59    3.96
   0  -3   0    1.59    4.48
   0   3   0   -2.76    4.25
   0   3   0    4.51    3.55
  -1  -3   0    4.53    4.94
   1  -3   0    5.54    5.14
  -1  -3   0    7.46    4.58
   1   3   0    0.24    5.40
  -1   3   0    5.32    5.26
   1   3   0    7.37    4.00
  -2  -3   0 5342.81  333.07
  -2  -3   0 5493.54  337.24
   2  -3   0 4559.44  313.26
  -2  -3   0 5292.60  313.64
  -2   3   0 5550.88  313.82
   2   3   0 5014.37  313.52
   2   3   0 5041.87  336.95
  -3  -3   0  101.77   11.72
  -3  -3   0   81.18   11.40
  -3  -3   0  135.43   12.84
   3  -3   0  112.69   12.32
  -3   3   0  130.30   13.06
   3   3   0  107.65   12.22
  -4  -3   0  123.10   13.21
   4  -3   0   94.99   12.77
  -4  -3   0  130.83   13.83
  -4  -3   0   99.31   11.68
  -4   3   0   93.97   12.44
   4   3   0   94.19   11.48
   4   3   0   92.49   12.32
  -5  -3   0  322.65   27.00
  -5  -3   0  364.97   28.04
   5  -3   0  325.43   26.96
   5   3   0  385.53   28.25
   5   3   0  339.47   27.90
   6  -3   0  400.09   33.14
  -6  -3   0  384.89   32.61
  -6  -3   0  442.36   34.62
   6   3   0  456.63   34.18
  -6   3   0  468.22   33.67
  -7  -3   0   -0.17    8.60
   7  -3   0  -11.16    7.39
   7   3   0    4.03    9.01
  -7   3   0   -1.37    9.79
  -8  -3   0   52.87   13.98
   8  -3   0   63.67   14.80
   8   3   0   54.61   15.06
  -8   3   0   64.73   14.73
   9  -3   0  127.50   20.86
  -9  -3   0  118.89   19.74
  -9   3   0  139.23   21.72
   9   3   0  107.46   19.42
 -10  -3   0   59.24   16.25
  10  -3   0   62.93   16.79
 -10   3   0   67.54   17.15
  10   3   0   31.65   15.64
 -11  -3   0   -4.96   12.32
 -11  -3   0   16.70   14.06
  11  -3   0    2.15   14.01
 -11   3   0   20.03   16.55
  11   3   0   -8.68   12.88
   0  -4   0   37.46    7.25
   0  -4   0   51.37    7.41
   0   4   0   51.61    6.97
   0   4   0   81.39    9.13
  -1  -4   0   80.00    9.97
   1  -4   0  100.07   10.49
  -1  -4   0  128.04   12.01
  -1   4   0  107.05   11.22
   1   4   0  111.00   11.50
   1   4   0  109.15   10.56
   2  -4   0  314.38   24.04
  -2  -4   0  353.53   25.79
  -2  -4   0  328.14   23.87
  -2  -4   0  350.81   24.15
  -2   4   0  339.70   24.85
   2   4   0  326.94   24.74
   2   4   0  343.79   25.61
  -3  -4   0   10.61    5.44
  -3  -4   0   16.75    7.31
   3  -4   0   15.15    7.69
  -3  -4   0    7.59    4.70
   3   4   0    7.30    5.71
  -3   4   0   15.94    7.89
   3   4   0   15.06    7.79
  -4  -4   0  237.14   23.86
  -4  -4   0  362.17   24.54
   4   4   0  311.37   23.80
  -4   4   0  342.51   24.71
   4   4   0  275.29   24.48
   5  -4   0    3.05    7.98
  -5  -4   0    2.31    8.35
  -5  -4   0    3.45    5.48
  -5  -4   0    3.16    7.79
   5   4   0    6.08    6.89
   5   4   0    0.31    7.86
  -5   4   0   -2.29    7.40
  -6  -4   0   10.28    6.63
  -6  -4   0   -3.75    7.71
  -6  -4   0   -2.30    8.31
   6  -4   0   11.01    8.77
  -6   4   0    5.53    8.08
   6   4   0   12.06    7.16
   6   4   0   16.62    9.75
   7  -4   0  323.89   27.33
  -7  -4   0  266.55   24.60
  -7  -4   0  210.27   22.74
   7   4   0  190.24   22.80
  -7   4   0  192.01   22.62
  -8  -4   0    6.68   10.49
  -8  -4   0   -1.31   10.48
   8  -4   0   -4.36   10.13
  -8   4   0   14.68   11.71
   8   4   0    9.30   11.90
  -9  -4   0   -6.84   10.70
  -9  -4   0    0.93   10.63
   9  -4   0    7.12   10.90
   9   4   0    2.21   10.88
  -9   4   0   -3.89   11.91
  10  -4   0   -1.23   12.10
 -10  -4   0   23.90   13.24
 -10  -4   0   23.58   13.32
 -10   4   0    3.95   14.50
  10   4   0  -13.07   12.21
  11  -4   0    7.31   14.43
 -11  -4   0   21.38   14.77
 -11  -4   0   18.90   14.33
  11   4   0   -9.25   13.30
 -11   4   0    3.55   14.98
   0  -5   0    1.19    6.10
   0  -5   0    2.42    5.08
   0   5   0    4.52    6.70
   0   5   0   -7.03    4.96
  -1  -5   0   71.79    9.99
   1  -5   0   73.33    9.95
  -1  -5   0   73.10    9.26
   1   5   0   60.80   10.34
  -1   5   0   80.79    9.95
   1   5   0   69.15    9.24
  -1   5   0   67.55   10.08
  -2  -5   0    7.47    7.05
   2  -5   0   -1.79    6.70
  -2  -5   0   -5.25    4.84
   2   5   0   13.00    7.37
   2   5   0   -1.32    4.75
  -2   5   0   12.27    7.33
   3  -5   0   -2.67    6.51
  -3  -5   0    0.97    5.72
  -3  -5   0    6.47    6.96
  -3  -5   0   -2.27    4.34
   3   5   0  -11.19    6.52
  -3   5   0    2.45    7.88
   3   5   0    2.42    5.49
   4  -5   0  279.45   24.68
  -4  -5   0  371.46   26.26
  -4  -5   0  300.66   25.15
  -4  -5   0  301.24   23.47
   4   5   0  368.91   26.32
   4   5   0  310.98   25.89
  -4   5   0  294.76   24.81
  -5  -5   0   49.20    9.98
   5  -5   0   78.32   12.42
  -5  -5   0   77.96    9.79
  -5  -5   0   74.86   12.04
   5   5   0   84.63   12.61
  -5   5   0  116.07   15.08
   5   5   0  121.34   14.38
  -6  -5   0  140.14   17.47
  -6  -5   0   82.91   14.22
   6  -5   0  164.55   18.74
   6   5   0  130.19   17.44
  -6   5   0  134.39   16.82
  -7  -5   0   66.08   13.84
   7  -5   0   57.32   13.23
   7   5   0   86.00   15.17
  -7   5   0   46.95   12.46
   8  -5   0   91.13   17.20
  -8  -5   0   93.98   17.56
  -8  -5   0   84.96   16.93
  -8   5   0  109.81   18.24
   8   5   0   62.78   15.92
   9  -5   0  -20.83   11.08
  -9  -5   0    5.37   11.68
  -9  -5   0  -17.03   10.00
   9   5   0   10.44   11.94
  -9   5   0   33.14   13.20
 -10  -5   0   11.73   13.19
 -10  -5   0    5.46   12.85
  10  -5   0    1.47   13.29
  10   5   0    1.93   12.96
 -10   5   0   -1.04   13.26
  11  -5   0    9.89   14.61
 -11  -5   0  -14.70   13.78
  11   5   0    9.62   14.35
 -11   5   0   -0.10   14.08
   0  -6   0   10.85    6.23
   0  -6   0    7.89    6.48
   0   6   0   14.57    6.55
   0   6   0    4.86    6.80
  -1  -6   0    2.07    6.06
   1  -6   0    4.08    6.67
  -1  -6   0   13.21    6.90
  -1   6   0    9.76    5.79
   1   6   0    6.68    5.68
   1   6   0    3.03    7.67
  -1   6   0   17.80    7.81
   2  -6   0   26.66    8.30
  -2  -6   0   32.18    7.71
  -2  -6   0   30.00    6.89
   2   6   0   17.87    8.25
  -2   6   0   14.21    8.56
   2   6   0   24.07    7.36
  -3  -6   0  301.18   24.68
  -3  -6   0  330.26   25.67
   3  -6   0  315.15   24.81
  -3   6   0  316.78   24.89
   3   6   0  311.17   25.30
   3   6   0  302.26   24.48
  -4  -6   0 1312.05   79.45
   4  -6   0 1156.57   74.16
  -4  -6   0 1080.99   75.62
  -4  -6   0 1075.81   73.40
   4   6   0 1149.93   74.36
  -4   6   0 1129.49   74.26
   4   6   0 1134.68   68.32
   4   6   0 1106.37   78.42
  -5  -6   0  201.01   16.82
  -5  -6   0  217.83   19.05
   5  -6   0  158.24   18.99
  -5  -6   0  213.37   21.03
  -5   6   0  177.63   19.85
   5   6   0  176.00   18.93
   5   6   0  173.85   20.06
  -6  -6   0   46.57   11.00
  -6  -6   0   37.25    8.45
   6  -6   0   26.88   10.27
   6   6   0   34.90   11.29
  -6   6   0   43.04   12.32
  -7  -6   0  209.11   19.97
  -7  -6   0  225.99   23.57
   7  -6   0  221.32   23.72
   7   6   0  204.46   23.46
  -7   6   0  208.42   23.89
   8  -6   0   92.26   16.82
  -8  -6   0  100.46   17.90
   8   6   0  104.54   18.35
  -8   6   0  122.55   18.46
  -9  -6   0   15.56   12.60
   9  -6   0   13.09   12.01
   9   6   0  -13.48   11.25
  -9   6   0   17.59   12.91
  10  -6   0   26.07   14.07
 -10  -6   0   19.47   14.25
  10   6   0   69.89   18.12
 -10   6   0   48.41   16.76
  11  -6   0   49.07   18.74
 -11  -6   0   51.89   17.61
 -11   6   0   37.32   17.92
  11   6   0   37.41   17.87
   0  -7   0   -0.69    6.51
   0  -7   0    1.62    5.86
   0   7   0    2.80    5.70
   0   7   0   -4.77    7.32
  -1  -7   0   30.03    8.41
  -1  -7   0   31.65    7.39
   1  -7   0   18.02    7.15
  -1   7   0   20.63    7.96
   1   7   0   28.40    7.85
  -1   7   0   17.87    7.07
   1   7   0   41.66    9.34
  -2  -7   0   39.31    8.78
  -2  -7   0   43.92    9.36
   2  -7   0   40.38    9.30
  -2   7   0   18.84    8.77
   2   7   0   25.10    7.14
   2   7   0   39.91    9.31
  -2   7   0   35.77    8.20
  -3  -7   0   12.88    5.64
  -3  -7   0   -7.89    6.94
   3  -7   0   -2.82    7.11
  -3   7   0    4.38    8.05
   3   7   0    2.15    7.88
   3   7   0    5.63    6.54
  -4  -7   0    5.43    7.73
  -4  -7   0   -0.95    4.92
  -4  -7   0   -7.70    4.33
   4  -7   0    5.35    7.56
   4   7   0    7.41    8.38
  -4   7   0   12.94    9.50
   4   7   0    5.47    5.78
  -5  -7   0   71.75   11.71
   5  -7   0  136.79   16.61
  -5  -7   0   80.93   13.25
  -5  -7   0   81.88   10.76
   5   7   0   77.43    6.73
   5   7   0   99.13   15.13
  -5   7   0   66.65   13.37
   6  -7   0   13.97   10.34
  -6  -7   0   10.22    6.10
  -6  -7   0  -19.04    7.76
  -6   7   0    3.74   10.26
   6   7   0    0.73    9.97
  -7  -7   0   -5.25    8.96
   7  -7   0    0.56    9.81
  -7  -7   0    3.29    7.77
   7   7   0    3.00   10.40
  -7   7   0    2.59   11.52
  -8  -7   0   38.34   12.83
   8  -7   0   41.70   14.78
   8   7   0   44.98   14.56
  -8   7   0   31.76   13.55
   9  -7   0   82.85   18.29
  -9  -7   0   91.63   18.61
   9   7   0   67.60   18.60
  -9   7   0   87.43   19.80
  10  -7   0   -9.14   12.10
 -10  -7   0   -8.78   13.12
 -10   7   0   -6.81   13.84
  10   7   0   -7.54   13.14
   0  -8   0  311.73   27.17
   0  -8   0  351.55   26.83
   0   8   0  348.11   27.38
   0   8   0  352.69   27.42
  -1  -8   0   79.27   12.26
   1  -8   0   99.12   12.34
  -1  -8   0   57.26    9.99
   1   8   0   80.54   11.09
  -1   8   0   84.96   11.78
  -1   8   0   88.68   13.12
   1   8   0   63.83   11.38
  -2  -8   0   -5.81    5.23
  -2  -8   0    0.10    7.72
   2  -8   0    7.01    7.56
  -2   8   0    1.73    8.19
   2   8   0   -0.42    5.62
   2   8   0   -3.59    7.59
  -2   8   0    3.45    6.20
  -3  -8   0   61.58   10.48
   3  -8   0   44.33   10.73
  -3  -8   0   55.58   10.84
   3   8   0   50.80   11.10
   3   8   0   50.44    9.99
  -3   8   0   40.66   10.37
   4  -8   0   76.83   12.90
  -4  -8   0   71.61   13.01
  -4  -8   0   45.02    9.66
   4   8   0   49.89   11.78
  -4   8   0   59.43   12.52
  -5  -8   0   23.27    7.02
   5  -8   0   27.84   10.96
  -5  -8   0   15.51    9.99
  -5   8   0   23.82   11.40
   5   8   0   10.21    8.34
   6  -8   0   19.58   10.54
  -6  -8   0   17.33   10.54
  -6  -8   0   11.17    6.70
  -6   8   0   14.92   10.18
   6   8   0   -7.73    9.50
   7  -8   0   98.41   17.16
  -7  -8   0  119.71   18.33
   7   8   0  102.64   18.59
  -7   8   0  105.16   17.48
   8  -8   0    0.28   11.10
  -8  -8   0   15.40   12.52
  -8   8   0   -2.89   12.43
   8   8   0   16.13   13.53
   9  -8   0    6.86   12.81
  -9  -8   0    0.37   12.11
  -9   8   0   -6.84   14.06
   9   8   0   -9.38   12.58
  10  -8   0    0.85   13.85
 -10  -8   0   10.65   15.10
 -10   8   0   22.17   16.41
  10   8   0   16.61   15.02
   0  -9   0   -2.47    7.28
   0  -9   0    9.23    5.74
   0   9   0   11.43    8.19
   0   9   0    1.22    6.27
  -1  -9   0  355.25   27.53
  -1  -9   0  321.71   26.14
   1  -9   0  367.09   26.40
  -1   9   0  307.22   27.10
  -1   9   0  282.41   26.38
   1   9   0  316.53   26.95
  -2  -9   0  977.47   62.58
  -2  -9   0  909.99   65.95
   2  -9   0  961.35   62.33
  -2   9   0  907.12   65.95
  -2   9   0  981.90   63.09
   2   9   0  875.84   62.68
   3  -9   0  133.19   16.35
  -3  -9   0  115.93   15.87
  -3  -9   0  175.79   18.44
  -3   9   0  128.75   15.62
  -3   9   0  143.49   18.10
   3   9   0  105.78   15.44
   4  -9   0   40.36   11.51
  -4  -9   0   28.07   10.51
  -4   9   0   44.95   12.49
   4   9   0   18.61   11.17
  -5  -9   0  568.78   41.98
   5  -9   0  538.58   41.80
   5   9   0  531.69   42.18
  -5   9   0  564.14   42.82
   6  -9   0  352.66   31.20
  -6  -9   0  331.22   30.04
   6   9   0  363.35   33.50
  -6   9   0  305.01   30.83
  -7  -9   0   21.71   11.99
   7  -9   0   12.42   11.75
  -7   9   0    2.26   11.97
   7   9   0   20.78   12.69
  -8  -9   0  271.03   28.80
   8  -9   0  257.60   28.56
   8   9   0  262.04   29.01
  -8   9   0  199.39   26.49
   9  -9   0  245.28   31.52
  -9  -9   0  325.34   33.02
  -9   9   0  231.27   30.53
   9   9   0  278.19   33.09
 -10  -9   0   14.82   15.08
  10  -9   0  -18.56   12.66
  10   9   0  -33.50   11.74
 -10   9   0    5.48   14.31
   0 -10   0   -5.89    6.78
   0 -10   0   16.68    6.41
   0  10   0   -3.63    8.32
   1 -10   0   15.28    9.28
  -1 -10   0   10.62    6.73
  -1 -10   0   11.43    8.68
   1  10   0   15.10    9.23
  -1  10   0   20.18   10.06
  -2 -10   0   29.46   10.28
   2 -10   0   32.13   10.60
  -2 -10   0   16.64    7.67
   2  10   0   25.08   10.53
  -2  10   0   35.59   11.23
  -3 -10   0  316.14   27.83
   3 -10   0  339.58   28.98
  -3  10   0  234.51   25.68
   3  10   0  254.16   26.94
   4 -10   0   26.16   11.05
  -4 -10   0   35.70   12.24
   4  10   0   28.90   11.66
  -4  10   0   33.04   11.61
   5 -10   0    4.68   10.81
  -5 -10   0    5.29    9.81
   5  10   0    0.34    9.94
  -5  10   0   15.39   11.63
  -6 -10   0  221.51   25.13
   6 -10   0  268.34   27.31
  -6  10   0  198.85   24.51
   6  10   0  217.64   26.32
  -7 -10   0  141.58   20.13
   7 -10   0  155.69   21.75
   7  10   0  135.04   21.71
  -7  10   0  102.17   19.12
   8 -10   0   15.30   11.91
  -8 -10   0   22.37   13.33
  -8  10   0   10.70   13.96
   8  10   0    7.54   13.18
  -9 -10   0    4.38   13.75
   9 -10   0    0.67   13.05
  -9  10   0  -11.31   13.84
   9  10   0  -10.44   12.85
   0 -11   0    3.06    8.49
   0  11   0  -12.65    8.79
   1 -11   0   30.62   11.45
  -1 -11   0   51.41   11.85
   1  11   0   35.67   11.44
  -1  11   0   58.08   13.36
   2 -11   0   81.55   14.27
  -2 -11   0   97.58   15.97
  -2  11   0   82.01   14.82
   2  11   0   96.98   15.58
   3 -11   0  237.35   26.30
  -3 -11   0  305.62   28.46
  -3  11   0  354.41   31.12
   3  11   0  293.07   28.56
   4 -11   0   -7.73    8.99
  -4 -11   0   18.56   10.76
  -4  11   0    1.13   10.85
   4  11   0    6.04   10.57
  -5 -11   0   69.78   14.89
   5 -11   0   66.36   15.64
  -5  11   0   67.59   16.38
   5  11   0   65.53   15.25
  -6 -11   0    8.37   11.53
   6 -11   0   28.60   12.57
   6  11   0   19.76   12.53
  -6  11   0   14.54   13.40
   7 -11   0   12.11   13.31
  -7 -11   0   19.56   13.56
  -7  11   0   -0.23   12.65
   7  11   0   -7.76   11.51
  -8 -11   0  100.88   19.96
   8 -11   0  152.29   23.80
   8  11   0  176.39   26.07
  -8  11   0  111.13   21.81
  -9 -11   0  -16.43   12.12
   9 -11   0   15.38   14.54
   9  11   0   14.73   15.20
  -9  11   0   50.34   18.32
   0 -12   0  450.16   34.58
   0  12   0  377.37   34.64
  -1 -12   0   19.79   10.61
   1 -12   0   12.80    9.72
  -1  12   0   -0.20   10.21
   1  12   0   21.99   11.22
  -2 -12   0   20.41   10.69
   2 -12   0   32.83   11.68
  -2  12   0   20.36   11.49
   2  12   0   14.99   11.59
  -3 -12   0   87.84   16.75
   3 -12   0   94.14   16.41
   3  12   0  101.99   16.92
  -3  12   0  145.38   20.18
   4 -12   0   56.66   14.36
  -4 -12   0   49.95   14.33
  -4  12   0   52.52   14.78
   4  12   0   70.72   16.34
  -5 -12   0   21.57   12.00
   5 -12   0   -1.94   11.50
   5  12   0    7.93   11.69
  -5  12   0    0.90   13.01
  -6 -12   0   54.78   15.00
   6 -12   0   23.25   14.28
  -6  12   0   26.23   14.83
   6  12   0   22.58   13.55
  -7 -12   0   29.90   14.37
   7 -12   0   23.73   14.09
  -7  12   0   29.69   16.08
   7  12   0   33.41   14.69
   8 -12   0  173.02   25.45
  -8 -12   0  144.48   23.30
   8  12   0  121.93   23.85
  -8  12   0  160.14   25.78
  -9 -12   0   33.53   16.65
   9 -12   0   33.64   17.37
  -9  12   0   50.43   19.18
   9  12   0   49.73   18.41
   0 -13   0    0.75   10.11
   0  13   0    4.34   10.85
  -1 -13   0  171.99   22.26
   1 -13   0  160.61   21.55
   1  13   0  138.77   20.42
  -1  13   0  151.13   21.44
   2 -13   0   70.53   16.04
  -2 -13   0   89.38   16.08
  -2  13   0   67.02   16.29
   2  13   0   93.37   17.45
  -3 -13   0   25.86   12.34
   3 -13   0   34.28   13.76
   3  13   0   33.06   13.26
  -3  13   0   31.93   13.14
  -4 -13   0   77.70   16.00
   4 -13   0   75.65   16.13
  -4  13   0   71.46   17.11
   4  13   0   79.44   18.37
   5 -13   0  109.31   19.82
  -5 -13   0   84.42   17.24
  -5  13   0   85.54   19.68
   5  13   0   71.38   17.93
   6 -13   0   25.45   14.31
  -6 -13   0    4.02   11.75
   6  13   0  -11.19   12.34
  -6  13   0   -4.57   13.28
  -7 -13   0    5.79   13.80
   7 -13   0    6.85   14.79
  -7  13   0   27.61   15.27
   7  13   0   18.06   14.78
  -8 -13   0   24.93   15.37
   8 -13   0   28.43   15.75
   8  13   0    9.58   14.59
  -8  13   0   38.56   18.85
   0 -14   0   24.54   11.95
   0  14   0   16.47   13.46
  -1 -14   0   35.64   13.70
   1 -14   0   65.53   15.42
  -1  14   0   53.29   14.37
   1  14   0   32.00   12.95
   2 -14   0   18.14   12.63
  -2 -14   0   -2.56   10.76
  -2  14   0    5.01   11.92
   2  14   0    7.60   11.59
  -3 -14   0   12.44   12.58
   3 -14   0   30.29   14.22
  -3  14   0    4.96   11.66
   3  14   0   11.70   12.22
   4 -14   0    4.07   12.41
  -4 -14   0   -2.88   11.69
  -4  14   0   -1.42   12.73
   4  14   0   -2.59   12.60
  -5 -14   0  105.70   19.71
   5 -14   0   89.04   20.17
  -5  14   0  116.92   21.40
   5  14   0   86.09   19.58
  -6 -14   0   19.93   13.94
   6 -14   0   -8.53   11.57
   6  14   0    0.30   13.30
  -6  14   0   25.94   15.77
   7 -14   0   18.59   15.07
  -7 -14   0   11.90   13.64
  -7  14   0  -19.09   13.02
   7  14   0   -2.77   12.84
   0 -15   0    5.31   11.49
   0  15   0   14.48   13.65
  -1 -15   0   29.87   13.14
   1 -15   0    2.81   11.91
   1  15   0   48.46   16.02
  -1  15   0   14.14   13.13
  -2 -15   0   26.38   13.06
   2 -15   0   27.80   14.16
  -2  15   0   31.32   14.73
   2  15   0   22.07   14.73
   3 -15   0   -9.15   12.09
  -3 -15   0   25.59   14.08
  -3  15   0   12.95   13.68
   3  15   0   13.05   12.96
  -4 -15   0  -13.26   11.96
   4 -15   0   19.79   13.89
  -4  15   0   15.35   14.25
   4  15   0   17.81   14.22
  -5 -15   0   50.39   17.52
   5 -15   0   53.25   17.88
  -5  15   0   51.40   18.75
   5  15   0   47.81   17.63
  -6 -15   0   71.20   19.06
   6 -15   0   69.98   20.07
   6  15   0   67.72   19.54
  -6  15   0   71.26   21.18
  -7 -15   0  -27.11   12.43
   7 -15   0   18.67   15.53
   7  15   0   24.89   16.90
   0 -16   0   77.89   17.18
   0  16   0   88.89   19.88
   1 -16   0   81.60   19.65
  -1 -16   0   93.50   19.89
   1  16   0   88.04   19.76
  -1  16   0   98.16   19.22
  -2 -16   0   16.49   13.59
   2 -16   0   43.06   15.60
   2  16   0   33.14   16.04
  -2  16   0   55.24   15.99
  -3 -16   0   41.19   15.66
   3 -16   0   34.76   16.81
   3  16   0   11.98   14.08
  -3  16   0   20.44   15.07
   4 -16   0   44.85   16.68
  -4 -16   0    8.17   13.92
  -4  16   0   17.24   15.72
   4  16   0   21.31   14.93
   5 -16   0   -0.06   14.49
  -5 -16   0    8.15   14.87
   5  16   0   11.58   15.47
  -5  16   0   -8.45   15.47
   6 -16   0   31.51   16.75
  -6  16   0   40.36   18.36
   6  16   0    8.51   15.93
   0 -17   0    5.02   12.99
   0  17   0    4.25   14.17
  -1 -17   0   28.70   15.74
   1 -17   0   28.08   15.87
   1  17   0   41.22   17.20
  -1  17   0   35.59   15.98
  -2 -17   0   10.09   14.16
   2 -17   0   14.56   15.26
  -2  17   0  -12.95   12.79
   2  17   0   -9.92   13.05
  -3 -17   0   20.14   14.97
   3 -17   0   81.48   19.92
   3  17   0   54.34   19.17
  -3  17   0   67.26   19.97
  -4 -17   0    2.15   13.36
   4 -17   0    3.74   15.27
  -4  17   0  -12.72   14.36
   4  17   0  -27.57   11.47
   0 -18   0   10.42   14.34
   0  18   0    2.13   14.32
  -1 -18   0   49.42   18.00
   1 -18   0   59.19   17.85
   1  18   0   30.26   17.01
  -1  18   0   40.11   18.85
  -2 -18   0    5.02   17.54
   2 -18   0   36.27   17.53
   2  18   0   54.12   18.86
  -2  18   0   25.13   16.83
  -3  18   0  112.74   24.98
   3  18   0  169.93   25.90
 -11   0   1  -15.44   12.65
  11   0  -1  -10.24   13.62
  10   0  -1    0.38   11.57
 -10   0   1   11.23   12.59
   9   0  -1   -3.50   11.54
  -9   0   1   15.78   12.64
   8   0  -1   -5.85    9.42
  -8   0   1    5.44   10.69
  -7   0   1    7.20    8.65
   7   0  -1   -1.50    8.66
  -6   0   1  -10.39    7.52
   6   0  -1    9.50    8.82
  -6   0   1   -0.04    4.72
  -5   0   1    0.54    7.28
  -5   0   1    7.58    5.88
   5   0  -1   -4.97    7.09
   4   0  -1    8.44    7.16
  -4   0   1    9.88    6.93
  -3   0   1    1.58    5.97
   3   0  -1   -2.86    5.61
  -2   0   1   -2.18    4.34
   2   0  -1   -0.81    4.64
   1   0  -1   -0.54    2.54
  -1   0   1    2.87    2.27
   1   0  -1   -0.85    2.52
   0   0  -1   -1.25    1.62
  -1   0  -1    0.69    2.63
   1   0   1   -2.71    2.12
  -1   0  -1   -0.41    2.95
  -1   0  -1    3.82    3.19
   1   0   1    1.79    2.87
  -2   0  -1   -4.34    5.23
   2   0   1    3.75    4.99
  -3   0  -1   -3.44    6.61
   3   0   1    0.21    5.63
  -4   0  -1  -10.39    7.01
   4   0   1   -6.62    6.98
   5   0   1    8.36    8.12
  -5   0  -1  -10.13    7.42
   6   0   1    2.32    7.30
  -6   0  -1    0.78    8.76
   7   0   1  -10.50    8.43
  -7   0  -1    2.60   10.35
   8   0   1    2.01   10.19
  -8   0  -1   -5.88    9.88
  -9   0  -1    3.90   11.64
   9   0   1    4.88   11.62
 -10   0  -1   -7.02   12.34
  10   0   1   28.02   15.34
 -11   0  -1  -23.09   12.03
  11   0   1   28.60   14.96
 -11  -1   1  213.06   27.22
  11  -1  -1  162.62   25.11
  11   1  -1  151.75   24.86
 -11   1   1  162.51   24.55
  10  -1  -1   66.41   16.62
 -10  -1   1   66.74   16.73
  10   1  -1   82.30   17.96
 -10   1   1   87.90   18.71
   9  -1  -1   18.81   13.00
  -9  -1   1    4.61   11.14
   9   1  -1   16.37   13.07
  -9   1   1   19.31   13.33
  -8  -1   1  128.34   17.74
   8  -1  -1   96.82   16.54
  -8   1   1  129.80   17.97
   8   1  -1  129.21   18.43
   7  -1  -1  203.35   22.84
  -7  -1   1  235.26   24.12
  -7   1   1  273.79   25.98
   7   1  -1  270.53   25.81
   6  -1  -1  286.42   24.86
  -6  -1   1  237.70   23.65
  -6  -1   1  320.26   25.18
  -6   1   1  280.98   24.61
   6   1  -1  304.87   25.27
  -5  -1   1   14.36    8.14
   5  -1  -1   15.76    8.51
  -5  -1   1   29.48    7.56
  -5   1   1   12.28    7.89
   5   1  -1   29.17    9.53
  -4  -1   1   34.94    7.04
  -4  -1   1   41.43    8.33
   4  -1  -1   32.87    8.22
  -4   1   1   33.70    8.78
   4   1  -1   34.33    8.22
   3  -1  -1  142.79   13.88
  -3  -1   1  150.55   13.88
  -3   1   1  148.16   14.04
   3   1  -1  158.48   14.22
   2  -1  -1   17.46    5.44
  -2  -1   1    5.28    4.05
  -2  -1   1   10.93    4.87
   2   1  -1   16.46    5.46
  -2   1   1   17.15    5.58
   1  -1  -1  402.94   23.52
  -1  -1   1  343.26   24.74
  -1  -1   1  394.62   23.19
  -1  -1   1  364.24   23.12
   1   1  -1  307.03   24.58
  -1   1   1  375.44   23.41
   1   1  -1  392.13   23.33
   1   1  -1  380.25   22.70
   1   1  -1  356.36   23.17
   0  -1  -1 2326.80  154.11
   0  -1   1 2413.20  155.12
   0  -1  -1 2318.25  144.49
   0  -1   1 2425.70  144.19
   0  -1  -1 2451.28  142.68
   0  -1  -1 2542.21  144.48
   0  -1  -1 2384.08  155.33
   0   1  -1 2369.20  144.22
   0   1   1 2468.81  144.50
   0   1  -1 2445.80  144.28
   0   1   1 2430.37  155.36
   0   1  -1 2112.49  155.04
   0   1   1 2472.79  142.68
  -1  -1  -1  367.99   22.63
  -1  -1  -1  328.93   23.98
   1  -1   1  350.54   22.36
  -1  -1  -1  352.23   22.66
  -1   1  -1  335.07   22.75
   1   1   1  346.06   22.61
   1   1   1  364.38   23.98
  -1   1  -1  344.63   22.47
  -2  -1  -1   29.59    6.42
   2  -1   1   35.05    6.24
   2   1   1   40.69    6.64
   2   1   1   33.88    6.40
  -2   1  -1   19.77    5.87
  -3  -1  -1   42.18    8.22
   3  -1   1   24.97    6.88
   3   1   1    1.26    5.07
  -3   1  -1   53.89    8.47
   3   1   1   30.12    8.06
   4  -1   1  119.03   13.13
  -4  -1  -1  137.32   14.49
   4   1   1  118.28   13.87
  -4   1  -1   81.05   12.28
  -5  -1  -1   -3.39    6.82
   5  -1   1   -2.06    6.48
   5   1   1    5.15    8.17
  -5   1  -1  -11.86    7.17
  -6  -1  -1   49.93   11.63
   6  -1   1   26.64    9.86
   6   1   1   46.58   11.76
  -6   1  -1   34.22   10.88
  -7  -1  -1   89.76   15.01
   7  -1   1   76.10   13.84
   7   1   1   97.35   15.62
  -7   1  -1   90.77   15.22
   8  -1   1  162.31   21.07
  -8  -1  -1  190.14   22.11
  -8   1  -1  177.69   22.20
   8   1   1  171.71   21.90
  -9  -1  -1   -7.24    9.55
   9  -1   1    5.39   10.89
   9   1   1  -20.18    9.95
  -9   1  -1   -5.35   10.46
  10  -1   1  110.24   20.65
 -10  -1  -1  158.01   23.17
  10   1   1  168.41   25.06
 -10   1  -1  131.62   21.79
  11  -1   1  115.38   21.90
 -11  -1  -1   76.85   19.51
 -11   1  -1   90.68   20.22
  11   1   1  151.90   24.42
 -11  -2   1   17.60   14.43
  11  -2  -1    1.60   12.62
  11   2  -1  -16.50   13.32
 -11   2   1    3.88   14.53
 -10  -2   1   10.34   12.91
  10  -2  -1   -9.35   11.52
 -10   2   1   -7.93   12.37
  10   2  -1   16.21   14.20
  -9  -2   1  235.02   25.58
   9  -2  -1  151.67   22.80
  -9   2   1  260.58   27.23
   9   2  -1  211.71   26.61
  -8  -2   1  157.49   19.85
   8  -2  -1  220.46   23.64
  -8   2   1  119.33   19.54
   8   2  -1  129.49   19.14
  -7  -2   1   11.35    9.09
   7  -2  -1   -4.94    9.44
   7   2  -1    1.30    9.22
  -7   2   1   14.59    9.89
  -6  -2   1   67.41   11.81
   6  -2  -1  101.16   14.27
  -6  -2   1   85.57   12.52
   6   2  -1   69.39   12.29
  -6   2   1   79.25   13.42
   5  -2  -1  258.57   22.55
  -5  -2   1  258.98   22.12
  -5  -2   1  270.25   22.31
  -5   2   1  254.87   22.31
   5   2  -1  259.02   22.02
  -4  -2   1  130.94   13.46
  -4  -2   1  110.31   12.61
   4  -2  -1  112.51   13.54
   4   2  -1  118.36   13.39
  -4   2   1  140.26   14.32
  -3  -2   1   89.22   11.09
  -3  -2   1  145.01   12.86
   3  -2  -1  128.08   12.65
   3   2  -1  109.73   11.94
  -2  -2   1   25.41    5.84
  -2  -2   1   22.16    6.00
  -2  -2   1   26.88    5.50
   2  -2  -1   26.59    6.81
   2   2  -1   41.04    6.85
   2   2  -1   32.70    5.87
  -2   2   1   24.44    6.42
   1  -2  -1 1703.50  112.90
  -1  -2   1 1810.22  110.80
  -1  -2   1 1851.07  121.24
  -1  -2   1 1899.20  112.83
  -1   2   1 1952.17  113.17
   1   2  -1 1901.00  121.19
   1   2  -1 1849.37  112.93
   1   2  -1 1904.71  110.82
   0  -2   1   33.72    4.21
   0  -2   1   23.44    3.80
   0  -2  -1   35.09    4.02
   0  -2  -1   25.28    4.23
   0  -2  -1   36.14    4.97
   0   2  -1   32.28    3.88
   0   2   1   34.42    4.56
   0   2  -1   39.31    4.87
   0   2  -1   31.50    4.21
   0   2   1   45.67    5.47
  -1  -2  -1   62.68    6.92
  -1  -2  -1   51.57    6.57
   1  -2   1   50.99    6.20
  -1  -2  -1   61.79    6.72
   1   2   1   41.40    5.78
   1   2   1   60.43    4.72
   1   2   1   58.04    6.96
  -1   2  -1   56.35    6.66
  -2  -2  -1 1559.27   95.18
  -2  -2  -1 1558.36  102.08
  -2  -2  -1 1591.77   95.22
   2  -2   1 1413.02   94.85
   2   2   1 1492.50  101.92
   2   2   1 1589.41   95.24
  -2   2  -1 1611.98   95.16
  -3  -2  -1  413.88   30.27
   3  -2   1  444.04   30.14
   3   2   1  392.99   29.91
   3   2   1  474.85   32.24
  -3   2  -1  445.98   30.57
   4  -2   1   48.05    9.15
  -4  -2  -1   59.57    9.63
  -4   2  -1   35.73    9.05
   4   2   1   56.56    9.45
   4   2   1   53.73    8.55
  -5  -2  -1  385.01   28.78
   5  -2   1  370.33   28.64
   5   2   1  359.02   28.63
  -5   2  -1  377.78   29.04
  -6  -2  -1  599.05   40.49
   6  -2   1  534.32   39.56
  -6   2  -1  525.23   40.13
   7  -2   1  -14.92    8.14
  -7  -2  -1   -8.34    8.54
  -7   2  -1   -3.81    9.21
   7   2   1    7.48    9.76
   8  -2   1   53.99   13.45
  -8  -2  -1   44.17   12.52
  -8   2  -1   71.44   14.95
   8   2   1   49.89   13.39
  -9  -2  -1  108.69   18.56
   9  -2   1  123.59   20.15
  -9   2  -1  124.62   19.70
   9   2   1  110.42   19.23
 -10  -2  -1  233.30   29.15
  10  -2   1  268.24   31.15
 -10   2  -1  296.31   31.24
  10   2   1  223.35   28.83
  11  -2   1   -7.24   13.30
 -11  -2  -1   10.61   14.38
 -11   2  -1   -8.82   14.25
  11   2   1   -0.07   14.63
 -11  -3   1   24.92   14.91
  11  -3  -1   -8.97   12.57
 -11  -3   1    6.48   13.95
 -11   3   1   19.43   15.89
  11   3  -1    6.91   14.42
 -10  -3   1   15.17   12.53
  10  -3  -1   12.41   14.20
  10   3  -1   23.94   14.43
 -10   3   1    3.98   12.44
   9  -3  -1   27.78   13.24
  -9  -3   1   37.74   12.93
   9   3  -1   43.60   14.89
  -9   3   1   34.58   14.13
   8  -3  -1   49.87   14.12
  -8  -3   1   39.15   12.06
   8   3  -1   35.57   13.16
  -8   3   1   43.61   12.53
  -7  -3   1    1.63    9.55
   7  -3  -1   24.79   10.87
   7   3  -1   31.81   11.92
  -7   3   1   19.33    9.72
   6  -3  -1  186.66   19.72
  -6  -3   1  221.56   20.35
  -6  -3   1  218.27   20.49
  -6   3   1  127.94   17.16
   6   3  -1  143.42   18.11
   5  -3  -1   73.54   12.40
  -5  -3   1   81.47   11.78
  -5  -3   1   85.56   11.32
   5   3  -1   70.16   12.05
  -5   3   1   84.88   12.23
  -4  -3   1    2.07    6.24
  -4  -3   1   -3.20    5.86
  -4  -3   1    6.52    5.63
   4  -3  -1   -1.52    6.75
  -4   3   1    0.39    7.27
   4   3  -1    2.55    7.13
  -3  -3   1    1.67    4.89
  -3  -3   1   -3.38    6.04
   3  -3  -1    4.99    6.21
  -3   3   1   -6.64    6.24
   3   3  -1    6.92    6.65
  -2  -3   1   85.02    7.72
   2  -3  -1   89.17   10.05
  -2  -3   1   85.79    9.80
  -2  -3   1   77.93    9.35
   2   3  -1   88.54    7.52
   2   3  -1  107.56   11.09
  -2   3   1   99.12   11.00
  -1  -3   1  536.86   36.56
   1  -3  -1  564.03   34.72
  -1  -3   1  536.90   34.16
  -1  -3   1  502.76   32.38
  -1   3   1  547.36   34.83
   1   3  -1  523.53   34.43
   0  -3   1   37.87    5.54
   0  -3  -1   42.30    6.42
   0  -3   1   30.42    5.55
   0  -3  -1   28.14    5.31
   0   3  -1   26.27    5.86
   0   3   1   30.44    6.33
   0   3   1   43.25    6.05
  -1  -3  -1   21.02    2.94
  -1  -3  -1   18.89    5.48
   1  -3   1   16.90    5.42
  -1  -3  -1    9.17    5.13
  -1  -3  -1   13.66    4.94
  -1   3  -1   13.82    5.53
   1   3   1   20.14    5.82
   1   3   1   20.51    3.02
   1   3   1    7.96    5.72
  -2  -3  -1  175.62   15.20
  -2  -3  -1  161.77   14.99
  -2  -3  -1  136.73   13.92
   2  -3   1  162.24   14.69
  -2   3  -1  171.49   15.02
   2   3   1  179.55   15.23
   2   3   1  159.99   14.82
  -3  -3  -1  367.16   26.19
   3  -3   1  328.05   25.66
  -3  -3  -1  349.23   26.29
   3   3   1  365.10   26.29
  -3   3  -1  355.81   26.02
   4  -3   1   57.11   10.47
  -4  -3  -1   50.98    9.93
  -4  -3  -1   52.17    9.48
   4   3   1   51.22    8.91
  -4   3  -1   82.52   11.92
   4   3   1   84.08   12.24
  -5  -3  -1   41.80    9.93
   5  -3   1   47.75   10.35
  -5   3  -1   30.77    9.42
   5   3   1   64.54   10.57
   5   3   1   36.21    9.44
  -6  -3  -1   -2.41    8.00
   6  -3   1   12.81    9.32
  -6   3  -1    1.05    7.86
   6   3   1   -7.04    8.49
   7  -3   1  152.84   19.59
  -7  -3  -1  170.31   20.62
   7   3   1  214.60   22.92
  -7   3  -1  151.42   20.39
  -8  -3  -1   16.92   10.90
   8  -3   1   13.04   10.49
  -8   3  -1    0.00   10.04
   8   3   1    3.20    9.79
   9  -3   1   13.32   12.70
  -9  -3  -1    3.59   11.91
  -9   3  -1   11.17   11.97
   9   3   1   19.38   12.98
  10  -3   1   -2.54   11.23
 -10  -3  -1    9.19   11.80
 -10  -3  -1    3.52   12.43
 -10   3  -1  -16.41   12.67
  10   3   1  -15.46   10.75
  11  -3   1    6.31   13.48
 -11  -3  -1   32.16   15.01
 -11  -3  -1   -2.09   13.42
  11   3   1    7.05   14.89
 -11   3  -1   29.26   16.77
  11  -4  -1   38.92   17.37
 -11  -4   1   27.05   16.17
 -11  -4   1   29.45   16.08
 -11   4   1   37.95   17.35
  11   4  -1   16.89   16.45
 -10  -4   1   -8.60   11.40
 -10  -4   1   11.18   12.45
  10  -4  -1   -7.24   13.14
 -10   4   1  -14.01   12.52
  10   4  -1   22.21   14.90
  -9  -4   1   28.60   13.17
  -9  -4   1   13.99   11.35
   9  -4  -1   20.56   12.54
   9   4  -1   17.07   12.75
  -9   4   1    6.43   11.76
  -8  -4   1   -6.05    9.25
  -8  -4   1   12.47   10.80
   8  -4  -1    6.99   10.19
   8   4  -1  -13.80   10.12
  -8   4   1   -2.97    9.79
  -7  -4   1   89.44   14.96
  -7  -4   1  113.62   15.35
   7  -4  -1  109.37   15.99
  -7   4   1  118.31   16.61
   7   4  -1   67.44   14.13
  -6  -4   1  179.46   19.78
  -6  -4   1  196.62   20.85
  -6  -4   1  181.37   19.12
   6  -4  -1  173.49   19.59
   6   4  -1  206.09   21.50
   5  -4  -1   10.07    8.28
  -5  -4   1   -5.94    6.60
  -5  -4   1   -2.15    6.98
  -5  -4   1    0.57    5.06
   5   4  -1   10.28    8.55
  -5   4   1   10.89    7.62
  -4  -4   1   63.92    9.00
  -4  -4   1   57.18   10.06
   4  -4  -1   68.32   11.65
   4   4  -1   61.30   10.54
  -4   4   1   62.34   10.42
   3  -4  -1   69.15   10.73
  -3  -4   1   78.42    9.75
  -3  -4   1   76.44    7.57
  -3  -4   1   74.61   10.92
   3   4  -1   85.51   11.70
   3   4  -1   81.21    7.05
  -3   4   1   70.22   10.84
  -2  -4   1 3001.15  176.61
   2  -4  -1 2576.48  176.39
  -2   4   1 3016.41  176.98
   2   4  -1 2839.19  176.72
   2   4  -1 3032.31  172.33
  -1  -4   1  449.47   31.62
  -1  -4   1  435.44   29.57
   1  -4  -1  404.00   29.49
  -1   4   1  459.18   30.37
   1   4  -1  466.74   30.13
   0  -4   1  116.15   11.35
   0  -4   1  132.66   11.60
   0  -4  -1  126.80   11.82
   0  -4  -1  110.13   11.47
   0   4   1  113.00   11.29
   0   4   1  117.58   12.06
   0   4  -1   97.23   11.28
  -1  -4  -1  167.09   15.41
  -1  -4  -1  148.27   14.21
   1  -4   1  155.33   14.08
  -1  -4  -1  203.38   11.17
  -1   4  -1  172.40   14.83
   1   4   1  159.22   15.44
   1   4   1  107.01   13.45
  -2  -4  -1    4.31    6.05
  -2  -4  -1    9.34    5.52
  -2  -4  -1   18.58    7.70
   2  -4   1    8.68    6.41
   2   4   1    8.08    6.73
  -2   4  -1    3.87    6.54
   2   4   1   13.92    6.08
   2   4   1   16.86    2.94
  -3  -4  -1    7.50    5.54
   3  -4   1   15.44    6.91
  -3  -4  -1    6.29    7.25
   3   4   1    5.80    7.15
   3   4   1    4.56    4.97
  -3   4  -1   19.38    8.01
  -4  -4  -1  115.82   13.85
   4  -4   1  126.13   13.83
   4   4   1  103.14   13.78
  -4   4  -1   97.13   13.10
   5  -4   1  145.18   17.11
  -5  -4  -1  168.97   17.88
  -5  -4  -1  135.95   16.76
  -5   4  -1  132.26   16.26
   5   4   1  155.72   17.82
   5   4   1  185.40   18.01
  -6  -4  -1  243.79   24.64
   6  -4   1  265.47   25.17
  -6  -4  -1  279.68   24.36
  -6   4  -1  221.85   24.21
   6   4   1  278.06   26.20
  -7  -4  -1  134.44   17.94
  -7  -4  -1   99.79   16.52
   7  -4   1  129.03   18.21
   7   4   1  111.76   18.07
  -7   4  -1   99.30   16.15
  -8  -4  -1   10.01   10.67
   8  -4   1   16.03   11.20
  -8  -4  -1   10.96   10.44
   8   4   1   19.66   12.22
  -8   4  -1   13.88   12.20
  -9  -4  -1   15.48   12.52
  -9  -4  -1    8.39   12.32
   9  -4   1    1.85   11.78
   9   4   1    4.59   11.79
  -9   4  -1    9.85   13.28
  10  -4   1   -7.10   11.90
 -10  -4  -1   -0.46   12.84
 -10  -4  -1   24.96   14.63
 -10   4  -1   -5.44   13.62
  10   4   1   24.61   15.22
 -11  -4  -1   -0.02   14.05
 -11  -4  -1    4.15   14.72
  11  -4   1   14.02   14.87
  11   4   1    1.05   13.34
 -11   4  -1   -5.62   13.15
  11  -5  -1  141.77   25.05
 -11  -5   1  159.43   24.90
  11   5  -1  159.14   25.59
 -11   5   1  143.82   24.25
 -10  -5   1   63.85   16.70
  10  -5  -1   42.89   16.34
 -10  -5   1   13.95   14.83
  10   5  -1   22.67   14.72
 -10   5   1   32.02   16.08
  -9  -5   1    6.52   11.53
   9  -5  -1   -9.45   11.36
  -9  -5   1   -8.32   11.35
  -9   5   1    2.21   12.30
   9   5  -1   -3.75   12.09
  -8  -5   1   51.66   14.45
  -8  -5   1   44.39   13.51
   8  -5  -1   36.49   13.34
  -8   5   1   48.01   13.19
   8   5  -1   26.98   13.28
   7  -5  -1  320.96   29.73
  -7  -5   1  283.94   27.91
   7   5  -1  271.95   27.42
  -7   5   1  269.99   27.88
   6  -5  -1   88.79   14.01
  -6  -5   1   59.77   10.59
  -6  -5   1   71.80   13.03
  -6   5   1   88.83   14.59
   6   5  -1   68.67   12.53
  -5  -5   1   20.42    7.16
   5  -5  -1   24.72    9.54
  -5  -5   1   10.88    7.75
  -5  -5   1   12.42    4.99
   5   5  -1   10.42    8.60
  -5   5   1    8.80    8.49
  -4  -5   1  748.70   51.51
   4  -5  -1  784.69   52.13
  -4  -5   1  766.53   51.60
  -4  -5   1  852.16   55.10
   4   5  -1  743.46   47.37
  -4   5   1  748.51   51.89
   4   5  -1  813.15   52.02
   3  -5  -1 1041.21   67.99
  -3  -5   1 1075.40   67.88
  -3  -5   1 1135.05   72.63
  -3  -5   1 1012.59   69.43
  -3   5   1 1034.30   68.29
   3   5  -1 1075.35   68.23
   3   5  -1 1059.58   63.65
  -2  -5   1   70.14    9.89
  -2  -5   1   66.21    5.28
   2  -5  -1   90.58   11.13
   2   5  -1   74.66   10.84
  -2   5   1   45.76    9.44
  -1  -5   1   10.20    5.99
  -1  -5   1    3.99    5.94
   1  -5  -1   -1.68    5.48
   1   5  -1    1.71    6.85
  -1   5   1   -4.88    6.49
  -1   5   1    3.91    5.91
   0  -5  -1    5.43    6.18
   0  -5  -1   -5.72    5.04
   0  -5   1    8.68    5.51
   0  -5   1   -0.08    5.85
   0   5   1   -4.06    5.36
   0   5  -1    2.11    6.60
   0   5   1    1.90    6.85
   1  -5   1   30.49    6.64
  -1  -5  -1   23.49    7.08
  -1  -5  -1   17.21    3.43
  -1  -5  -1   15.13    6.09
  -1   5  -1   16.86    7.26
   1   5   1   22.71    6.91
   1   5   1   14.05    7.35
   2  -5   1    1.87    6.21
  -2  -5  -1    2.46    5.08
  -2  -5  -1   -1.45    5.17
  -2  -5  -1   -0.19    6.54
   2   5   1    1.96    5.11
   2   5   1    4.65    7.09
  -2   5  -1    2.03    7.23
   3  -5   1  302.72   23.33
  -3  -5  -1  282.73   22.49
  -3  -5  -1  293.18   23.51
   3   5   1  302.76   24.06
  -3   5  -1  265.06   23.69
   3   5   1  327.19   24.18
   4  -5   1  558.36   40.12
  -4  -5  -1  544.97   39.83
  -4  -5  -1  566.87   40.30
  -4   5  -1  543.39   40.28
   4   5   1  667.58   41.23
  -5  -5  -1  149.74   15.19
   5  -5   1  139.73   16.09
  -5  -5  -1  138.44   16.41
   5   5   1  111.20   15.05
  -5   5  -1  156.28   17.46
   5   5   1  139.66   17.14
   6  -5   1   55.38   11.68
  -6  -5  -1   80.94   14.10
  -6   5  -1   71.99   14.12
   6   5   1   48.61   11.82
   7  -5   1  148.03   19.06
  -7  -5  -1  207.28   22.62
  -7   5  -1  140.11   19.32
   7   5   1  155.34   20.31
  -8  -5  -1  119.03   18.88
   8  -5   1  137.64   20.10
  -8   5  -1  158.79   21.65
   8   5   1  169.26   21.99
   9  -5   1    1.68   10.58
  -9  -5  -1    7.73   12.91
  -9  -5  -1   -9.10   11.42
   9   5   1   -0.48   10.84
  -9   5  -1   -6.52   12.10
 -10  -5  -1   26.29   14.85
  10  -5   1    0.63   13.31
 -10   5  -1    9.03   14.33
  10   5   1    8.75   14.24
  11  -5   1   43.56   17.80
 -11  -5  -1   32.42   17.03
  11   5   1   21.36   16.17
 -11   5  -1   14.89   16.88
  11  -6  -1   28.45   16.39
 -11  -6   1    3.46   14.15
 -11   6   1  -10.75   13.86
  11   6  -1  -20.63   11.88
  10  -6  -1   -1.56   13.93
 -10  -6   1   14.15   13.48
  10   6  -1   -1.02   13.55
 -10   6   1   14.51   13.06
  -9  -6   1   29.67   13.94
   9  -6  -1   25.90   13.71
  -9   6   1    7.70   13.25
   9   6  -1   45.51   15.21
  -8  -6   1   67.49   15.76
   8  -6  -1   52.21   14.63
   8   6  -1   57.49   15.61
  -8   6   1   85.83   17.02
   7  -6  -1    9.41   10.71
  -7  -6   1   17.81   10.92
  -7  -6   1   26.77    7.67
   7   6  -1   10.38   11.20
  -7   6   1   41.90   12.96
   6  -6  -1   10.75    9.44
  -6  -6   1   12.40    9.15
  -6  -6   1    6.95    5.55
   6   6  -1    5.65   10.05
   6   6  -1   14.90    5.15
  -6   6   1    1.13    9.47
  -5  -6   1   -3.48    7.59
  -5  -6   1   -0.56    4.32
  -5  -6   1    5.41    5.83
   5  -6  -1   -0.36    8.25
   5   6  -1    1.52    3.72
  -5   6   1    8.20    7.86
   5   6  -1   13.35    8.55
  -4  -6   1  318.66   25.89
  -4  -6   1  360.40   26.99
  -4  -6   1  323.14   23.45
   4  -6  -1  340.22   26.58
  -4   6   1  344.96   26.39
   4   6  -1  316.89   26.54
   4   6  -1  305.61   20.48
   3  -6  -1  175.06   17.80
  -3  -6   1  196.97   18.11
  -3  -6   1  176.07   17.32
   3   6  -1  217.07   19.57
  -3   6   1  154.80   17.76
   2  -6  -1   12.50    7.62
  -2  -6   1   26.59    7.38
  -2  -6   1   12.53    7.08
  -2   6   1   21.24    8.46
   2   6  -1   20.67    7.91
   1  -6  -1   66.75    9.93
  -1  -6   1   67.81    9.54
  -1  -6   1   60.55    9.27
  -1   6   1   41.49    9.03
   1   6  -1   52.56    9.28
  -1   6   1   61.16    9.04
   0  -6   1   41.02    7.66
   0  -6  -1   53.31    8.97
   0  -6  -1   31.15    7.83
   0  -6   1   48.51    8.64
   0   6   1   71.86   10.46
   0   6   1   35.15    8.12
   0   6  -1   54.54    9.69
  -1  -6  -1   14.23    3.34
  -1  -6  -1   18.59    7.57
   1  -6   1   27.27    7.36
  -1  -6  -1   12.77    5.91
   1   6   1    3.92    7.30
   1   6   1   18.85    6.92
  -1   6  -1    9.65    6.76
   2  -6   1   35.23    8.30
  -2  -6  -1   30.73    7.75
  -2  -6  -1   20.50    7.93
   2   6   1   34.54    7.77
  -2   6  -1   18.19    7.84
   2   6   1   42.90    9.79
   3  -6   1  123.42   13.81
  -3  -6  -1  131.73   13.21
  -3  -6  -1  104.56   13.45
  -3   6  -1  150.02   15.97
   3   6   1  101.78   13.70
   3   6   1  136.83   15.43
  -4  -6  -1   88.22   10.92
   4  -6   1  100.13   13.47
  -4  -6  -1   75.44   11.98
   4   6   1   94.22   12.62
  -4   6  -1  112.23   14.61
   4   6   1   55.45   11.78
   5  -6   1   -5.25    6.97
  -5  -6  -1    7.78    6.24
  -5  -6  -1    9.08    8.36
   5   6   1  -11.50    7.15
  -5   6  -1    8.27    8.56
   5   6   1    3.54    6.79
   6  -6   1   28.11   10.90
  -6  -6  -1   18.27    7.63
  -6  -6  -1   29.29   11.03
  -6   6  -1   18.57   10.70
   6   6   1    5.63    9.00
  -7  -6  -1   41.20   10.42
   7  -6   1   27.84   11.91
  -7  -6  -1   32.49   12.04
  -7   6  -1   30.09   11.60
   7   6   1   32.93   11.99
  -8  -6  -1   -1.52   11.12
   8  -6   1   -3.69   11.23
  -8  -6  -1   26.07    8.79
   8   6   1   11.68   12.24
  -8   6  -1    6.59   12.70
   9  -6   1    5.49   12.15
  -9  -6  -1    6.97   12.70
   9   6   1  -11.05   12.05
  -9   6  -1   -3.76   12.56
 -10  -6  -1  -22.29   12.40
  10  -6   1   -7.30   11.52
  10   6   1   -1.45   13.60
 -10   6  -1   40.38   17.04
 -11  -6  -1   26.16   15.59
  11  -6   1    7.25   15.50
 -11   6  -1  -12.75   14.85
  11   6   1   11.07   15.96
  11  -7  -1  -13.16   13.30
 -11  -7   1    0.88   14.25
  11   7  -1   13.05   15.40
 -11   7   1   -3.78   14.77
 -10  -7   1   43.00   16.48
  10  -7  -1   20.51   15.35
 -10   7   1   10.00   14.90
  10   7  -1   19.55   16.11
   9  -7  -1    5.95   13.14
  -9  -7   1   -1.30   12.25
   9   7  -1   16.09   14.17
  -9   7   1  -11.37   11.52
  -8  -7   1   11.99   12.05
   8  -7  -1   14.11   12.79
   8   7  -1   23.55   12.87
  -8   7   1   28.41   14.38
  -7  -7   1   61.24   14.31
   7  -7  -1   22.49   12.03
  -7   7   1   46.43   13.31
   7   7  -1   39.14   12.79
   6  -7  -1   13.58   10.39
  -6  -7   1   30.21   10.48
  -6  -7   1   24.05    6.62
  -6   7   1    9.08    9.94
   6   7  -1   14.46   11.08
   5  -7  -1   23.81    9.99
  -5  -7   1   36.10    9.21
  -5  -7   1   20.70    9.47
  -5  -7   1   19.12    5.81
  -5   7   1   18.88   10.05
   5   7  -1   16.86   10.04
   5   7  -1   20.72    3.85
  -4  -7   1  485.11   41.66
  -4  -7   1  611.97   40.36
   4  -7  -1  589.72   40.84
   4   7  -1  595.67   40.79
  -4   7   1  553.86   40.98
   3  -7  -1  134.53   15.81
  -3  -7   1  101.35   13.27
  -3  -7   1  141.75   15.24
   3   7  -1  168.22   17.06
  -3   7   1  149.33   16.37
   2  -7  -1    4.74    6.55
  -2  -7   1   18.55    6.74
  -2  -7   1   10.58    7.14
  -2   7   1   12.25    8.23
   2   7  -1    6.51    7.77
  -1  -7   1  147.47   14.09
  -1  -7   1  131.38   14.39
   1  -7  -1  121.21   14.40
   1   7  -1  119.74   14.49
  -1   7   1  119.88   14.42
  -1   7   1  136.37   14.30
   0  -7   1  147.88   15.03
   0  -7   1  124.00   13.73
   0  -7  -1  155.60   15.28
   0  -7  -1  153.06   15.12
   0   7   1  120.70   14.72
   0   7   1  123.71   13.91
   0   7  -1  113.98   13.77
  -1  -7  -1   84.77    7.29
   1  -7   1   74.03   10.73
  -1  -7  -1   59.85   10.10
  -1  -7  -1   66.84   10.22
   1   7   1  101.12   12.95
   1   7   1   92.23   11.65
  -1   7  -1   67.32   10.98
  -2  -7  -1   18.15    6.33
  -2  -7  -1   19.97    8.59
   2  -7   1   24.89    8.18
   2   7   1   13.81    6.91
   2   7   1   18.94    8.42
  -2   7  -1   27.18    8.10
   3  -7   1   13.00    7.80
  -3  -7  -1    3.53    7.88
   3   7   1   -2.22    5.80
   3   7   1   -5.34    7.50
  -3   7  -1    6.20    8.28
  -4  -7  -1  162.05   15.52
   4  -7   1  153.15   17.57
  -4  -7  -1  171.74   18.71
  -4   7  -1  184.74   19.33
   4   7   1  207.31   20.25
   4   7   1  135.12   16.92
   5  -7   1   95.61   14.18
  -5  -7  -1   98.16   11.71
  -5  -7  -1   65.99   12.87
   5   7   1   64.65   12.46
  -5   7  -1   65.83   13.32
  -6  -7  -1   -2.84    9.23
   6  -7   1  -11.51    8.03
  -6  -7  -1    1.49    6.61
  -6   7  -1    3.45    9.60
   6   7   1   -2.08    9.52
  -7  -7  -1   76.54   13.10
  -7  -7  -1   88.87   15.62
   7  -7   1   54.97   13.51
   7   7   1   88.81   16.90
  -7   7  -1   85.52   16.69
  -8  -7  -1  144.40   21.17
   8  -7   1  177.50   22.82
  -8   7  -1  153.72   22.50
   8   7   1  168.19   22.71
   9  -7   1   -9.74   11.81
  -9  -7  -1   -7.59   12.04
  -9   7  -1   -8.67   12.40
   9   7   1    8.82   13.25
  10  -7   1   29.59   15.09
 -10  -7  -1   75.56   19.31
  10   7   1   17.93   16.50
 -10   7  -1   33.78   17.27
 -10  -8   1   -9.10   12.85
  10  -8  -1    9.38   13.57
  10   8  -1   16.44   14.54
 -10   8   1    1.24   13.92
   9  -8  -1  205.64   26.67
  -9  -8   1  255.54   28.81
  -9   8   1  246.86   28.38
   9   8  -1  188.53   26.56
   8  -8  -1  245.06   28.06
  -8  -8   1  300.72   29.35
   8   8  -1  215.67   27.69
   7  -8  -1   10.07   12.01
  -7  -8   1    3.46   10.43
  -7   8   1    0.47   10.54
   7   8  -1    8.83   11.39
  -6  -8   1  341.50   30.52
   6  -8  -1  395.04   31.81
   6   8  -1  359.24   31.23
  -6   8   1  336.23   31.09
  -5  -8   1  529.39   39.92
   5  -8  -1  526.65   40.60
  -5   8   1  541.35   41.29
   5   8  -1  576.31   41.26
  -4  -8   1   19.06    7.41
  -4  -8   1   40.33   10.49
   4  -8  -1   24.92    9.94
   4   8  -1   15.64    9.70
  -4   8   1   41.01   11.83
  -3  -8   1    6.11    8.02
   3  -8  -1   -1.85    7.69
  -3  -8   1   -5.39    5.50
  -3   8   1   15.08    9.11
   3   8  -1   -3.44    7.36
   2  -8  -1  321.64   24.65
  -2  -8   1  309.94   24.65
  -2  -8   1  268.63   23.60
  -2   8   1  302.09   25.17
  -2   8   1  285.22   24.91
   2   8  -1  260.29   23.86
  -1  -8   1   23.25    8.00
   1  -8  -1    7.65    7.51
  -1  -8   1   38.37    8.38
  -1   8   1   32.87    9.86
  -1   8   1   43.85    8.45
   1   8  -1   30.06    9.57
   0  -8  -1   -7.52    7.19
   0  -8  -1    4.33    5.37
   0  -8   1   -2.21    4.92
   0  -8   1    9.52    7.47
   0   8  -1    1.02    7.80
   0   8   1   -5.60    6.51
   0   8   1    0.87    5.88
  -1  -8  -1   35.65    9.06
   1  -8   1   52.65    9.67
  -1  -8  -1   51.52   10.13
  -1   8  -1   39.64    9.78
   1   8   1   69.46   10.57
   1   8   1   59.82   11.39
  -2  -8  -1  488.83   37.39
  -2  -8  -1  495.88   39.23
   2  -8   1  525.34   37.22
  -2   8  -1  499.76   37.87
   2   8   1  558.53   38.75
   2   8   1  583.57   40.02
  -3  -8  -1  345.49   26.39
   3  -8   1  322.00   26.36
   3   8   1  315.66   27.19
   3   8   1  313.44   27.14
  -3   8  -1  322.56   26.97
   4  -8   1  189.28   20.08
  -4  -8  -1  181.36   20.15
  -4   8  -1  183.17   20.87
   4   8   1  148.56   19.14
   4   8   1  193.41   20.30
  -5  -8  -1  365.77   29.88
   5  -8   1  354.96   29.89
  -5  -8  -1  328.50   27.60
   5   8   1  346.92   30.27
  -5   8  -1  380.83   30.01
  -6  -8  -1  234.42   25.10
  -6  -8  -1  207.24   20.79
   6  -8   1  229.55   24.24
   6   8   1  233.45   24.70
  -6   8  -1  207.85   23.94
  -7  -8  -1   26.24   12.91
   7  -8   1   18.35   12.21
   7   8   1   34.24   12.96
  -7   8  -1   15.17   11.86
   8  -8   1   67.53   16.51
  -8  -8  -1   64.30   15.76
   8   8   1   64.08   16.75
  -8   8  -1   61.71   17.46
   9  -8   1   58.92   16.25
  -9  -8  -1   73.78   17.24
   9   8   1  101.11   20.44
  -9   8  -1   38.24   16.89
 -10  -8  -1   19.05   14.82
  10  -8   1   42.85   17.12
  10   8   1    9.63   15.60
 -10   8  -1    3.35   15.03
 -10  -9   1   -8.21   13.51
  10  -9  -1    0.59   13.65
 -10   9   1    5.71   15.62
  10   9  -1    6.10   14.17
  -9  -9   1   23.49   13.85
   9  -9  -1    0.44   12.69
   9   9  -1    8.58   13.58
  -9   9   1    7.02   14.83
   8  -9  -1   -4.23   11.69
  -8  -9   1    9.22   12.38
   8   9  -1  -17.72    9.67
  -8   9   1  -16.40   11.85
  -7  -9   1    0.35    9.94
   7  -9  -1   -2.72    9.96
  -7   9   1   -7.17   11.88
   7   9  -1    3.95   10.45
   6  -9  -1  885.18   65.13
  -6  -9   1  946.74   65.24
   6   9  -1  940.95   66.14
  -6   9   1 1020.05   66.82
  -5  -9   1    8.83    9.44
   5  -9  -1   12.85   10.96
   5   9  -1   13.96   10.80
  -5   9   1   21.21   11.48
  -4  -9   1   11.52    6.20
  -4  -9   1    8.29    8.81
   4  -9  -1   -4.62    8.45
   4   9  -1   18.72    9.99
  -4   9   1    1.37    9.64
  -3  -9   1   82.17   12.27
   3  -9  -1   82.77   13.84
  -3  -9   1   91.47   13.38
  -3   9   1  103.93   15.93
   3   9  -1   97.57   14.78
  -2  -9   1    6.15    6.55
  -2  -9   1    2.46    7.69
   2  -9  -1    5.29    7.80
   2   9  -1   -8.47    7.63
  -2   9   1   12.93    9.18
  -2   9   1    7.45    7.43
  -1  -9   1   57.66   11.08
  -1  -9   1   80.37   11.33
   1  -9  -1   70.27   12.14
  -1   9   1   62.45   11.67
   1   9  -1   72.37   13.05
  -1   9   1   65.24   10.75
   0  -9   1   34.78    7.87
   0  -9   1   43.00   10.12
   0  -9  -1   26.20    7.90
   0  -9  -1   19.10    9.53
   0   9  -1   35.47    9.74
   0   9   1   16.15    7.27
   0   9   1   35.64   10.28
   1  -9   1    2.76    7.21
  -1  -9  -1  -12.15    6.98
  -1  -9  -1    6.95    6.39
   1   9   1    2.85    8.57
  -1   9  -1   13.22    8.02
   1   9   1    3.66    6.52
  -2  -9  -1   36.31    9.40
   2  -9   1   46.34   10.61
  -2  -9  -1   10.43    7.33
   2   9   1   38.71    9.22
   2   9   1   40.52   10.48
  -2   9  -1   34.36   10.35
   3  -9   1   43.12   10.96
  -3  -9  -1   17.71    9.39
   3   9   1   23.88    9.92
   3   9   1   15.07    7.69
  -3   9  -1   17.08    9.90
  -4  -9  -1    3.38    8.13
   4  -9   1    4.54    8.57
  -4   9  -1   -5.78    9.06
   4   9   1    1.24    8.68
  -5  -9  -1   37.74   12.26
   5  -9   1   55.55   13.58
  -5   9  -1   29.31   12.04
   5   9   1   44.27   12.90
  -6  -9  -1   33.16    8.96
   6  -9   1   18.71   11.45
  -6  -9  -1    7.15   10.73
   6   9   1   18.11   12.16
  -6   9  -1   37.51   13.13
  -7  -9  -1   81.35   16.92
   7  -9   1   70.68   16.03
  -7   9  -1   99.50   18.02
   7   9   1   90.28   17.03
   8  -9   1   23.72   12.47
  -8  -9  -1    0.49   11.09
  -8   9  -1  -10.70   11.72
   8   9   1   -5.90   11.55
   9  -9   1   27.25   15.57
  -9  -9  -1   46.12   16.32
   9   9   1   15.35   13.91
  -9   9  -1   37.50   16.88
  10  -9   1    0.20   14.53
 -10  -9  -1   12.32   14.50
  10   9   1   13.98   16.02
 -10   9  -1    7.38   16.36
  10 -10  -1   48.89   18.66
 -10  10   1   26.91   17.23
  10  10  -1   43.03   18.02
  -9 -10   1   95.41   20.48
   9 -10  -1  138.04   22.10
   9  10  -1  118.42   23.20
  -9  10   1  119.76   22.97
  -8 -10   1  153.69   22.36
   8 -10  -1  107.14   19.68
  -8  10   1  179.05   24.63
   8  10  -1  144.46   23.16
  -7 -10   1   -2.42   10.69
   7 -10  -1   -2.12   10.95
   7  10  -1    8.29   11.59
  -7  10   1   41.01   14.96
  -6 -10   1   59.03   14.23
   6 -10  -1  100.78   16.47
  -6  10   1   65.08   16.04
   6  10  -1   63.86   15.39
   5 -10  -1   65.10   13.69
  -5 -10   1   91.25   14.87
  -5  10   1   40.00   13.35
   5  10  -1   68.45   14.84
  -4 -10   1   21.19   11.27
   4 -10  -1   50.23   12.66
  -4  10   1   41.82   13.14
   4  10  -1   37.19   12.46
  -3 -10   1  184.76   19.95
   3 -10  -1  195.74   21.73
  -3 -10   1  190.58   20.26
  -3  10   1  165.53   20.76
   3  10  -1  189.57   21.90
   2 -10  -1   11.99    8.98
  -2 -10   1    9.35    6.31
  -2 -10   1   -1.03    7.56
  -2  10   1    6.11    8.48
   2  10  -1    2.68    9.15
  -1 -10   1  219.93   21.19
   1 -10  -1  250.50   22.82
   1  10  -1  200.42   21.59
  -1  10   1  199.29   22.22
  -1  10   1  218.95   21.23
   0 -10   1   29.73    7.90
   0 -10  -1   27.05   10.34
   0 -10  -1   51.60   11.02
   0 -10   1   27.92    9.07
   0  10  -1   49.50   11.86
   0  10   1   20.86   10.32
   0  10   1   10.67    7.74
   1 -10   1  240.10   23.23
  -1 -10  -1  264.26   24.00
  -1  10  -1  304.31   26.10
   1  10   1  226.86   23.16
   1  10   1  210.05   22.84
  -2 -10  -1  565.59   38.79
   2 -10   1  507.49   37.16
  -2  10  -1  499.81   38.11
   2  10   1  446.51   37.91
   3 -10   1  187.95   21.34
  -3 -10  -1  260.31   25.15
  -3  10  -1  230.97   24.04
   3  10   1  204.60   23.85
   4 -10   1   -7.95    8.71
  -4 -10  -1  -16.58    7.15
  -4  10  -1  -13.25    9.26
   4  10   1    6.11    9.90
   5 -10   1  117.22   17.68
  -5 -10  -1   84.23   16.31
   5  10   1   84.33   16.75
  -5  10  -1   52.61   14.63
  -6 -10  -1   40.13   13.80
   6 -10   1   25.87   12.34
   6  10   1   19.58   12.52
  -6  10  -1   21.83   12.63
  -7 -10  -1  146.64   21.51
   7 -10   1  149.10   22.07
  -7  10  -1  108.69   19.42
   7  10   1  158.25   22.98
   8 -10   1   69.44   17.52
  -8 -10  -1   80.79   18.00
  -8  10  -1   89.51   19.78
   8  10   1   72.02   19.01
   9 -10   1   -2.58   13.83
  -9 -10  -1   18.62   14.47
  -9  10  -1   22.10   15.65
   9  10   1   12.81   14.77
  -9 -11   1   -1.80   14.01
   9 -11  -1    4.25   15.14
  -9  11   1    8.50   15.70
   9  11  -1   19.45   15.41
  -8 -11   1   16.52   12.78
   8 -11  -1   26.39   14.42
  -8  11   1   24.77   16.23
   8  11  -1   27.44   14.75
  -7 -11   1  163.10   23.47
   7 -11  -1  164.77   24.18
  -7  11   1  193.30   25.21
   7  11  -1  175.31   25.39
  -6 -11   1  194.40   23.74
   6 -11  -1  202.32   24.57
   6  11  -1  268.25   28.69
  -6  11   1  215.62   25.80
  -5 -11   1   18.93   11.91
   5 -11  -1   12.54   12.32
   5  11  -1    7.37   11.23
  -5  11   1   20.26   12.16
  -4 -11   1   47.70   12.79
   4 -11  -1   48.10   13.42
   4  11  -1   50.04   13.44
  -4  11   1   40.01   12.73
   3 -11  -1  599.94   43.63
  -3 -11   1  594.83   42.86
   3  11  -1  559.68   43.56
  -3  11   1  527.98   43.35
   2 -11  -1  366.33   31.76
  -2 -11   1  397.58   31.63
   2  11  -1  366.64   31.95
  -2  11   1  415.45   33.13
  -1 -11   1    9.35    7.43
   1 -11  -1    8.19    8.18
  -1 -11   1    2.93    8.11
   1  11  -1    5.16    9.92
  -1  11   1   -8.70    7.78
   0 -11  -1  679.77   46.50
   0 -11   1  679.45   45.91
   0  11  -1  589.80   46.14
   0  11   1  583.27   46.24
  -1 -11  -1  438.18   35.56
   1 -11   1  461.08   35.51
   1  11   1  462.78   36.68
  -1  11  -1  471.29   36.46
  -2 -11  -1   -4.05    8.60
   2 -11   1   12.43    9.73
  -2  11  -1   18.91   10.58
   2  11   1    8.78    9.70
  -3 -11  -1  329.42   29.54
   3 -11   1  367.01   29.43
   3  11   1  295.09   30.44
  -3  11  -1  326.67   31.71
   4 -11   1  219.53   24.51
  -4 -11  -1  263.05   25.46
   4  11   1  195.84   24.34
  -4  11  -1  251.78   25.76
  -5 -11  -1   97.28   17.03
   5 -11   1  160.40   20.66
  -5  11  -1  114.34   18.64
   5  11   1   91.70   17.87
  -6 -11  -1   15.81   12.23
   6 -11   1   12.26   11.40
   6  11   1    5.59   12.30
  -6  11  -1   11.95   12.98
  -7 -11  -1  240.15   28.75
   7 -11   1  315.10   31.89
   7  11   1  243.37   30.02
  -7  11  -1  268.22   30.43
   8 -11   1  184.84   25.19
  -8 -11  -1  106.01   22.38
   8  11   1  267.53   30.63
  -8  11  -1  161.49   24.37
   9 -11   1   13.51   14.88
  -9 -11  -1    4.12   13.61
   9  11   1  -10.09   14.15
  -9  11  -1   -9.39   14.76
   9 -12  -1  -10.53   13.17
  -9  12   1   -1.78   15.11
   9  12  -1   16.65   16.23
   8 -12  -1   13.22   14.19
  -8 -12   1   32.35   14.83
   8  12  -1   61.73   17.44
  -8  12   1   19.24   16.43
   7 -12  -1    8.32   12.04
  -7 -12   1   -6.52   12.07
   7  12  -1    8.02   13.35
  -7  12   1   11.93   14.70
   6 -12  -1   29.49   14.45
  -6 -12   1    2.40   11.75
  -6  12   1   25.07   14.73
   6  12  -1   21.99   13.83
  -5 -12   1   21.29   11.99
   5 -12  -1   42.73   13.83
   5  12  -1   30.91   13.44
  -5  12   1   52.05   16.40
   4 -12  -1   45.09   14.24
  -4 -12   1   64.72   14.62
   4  12  -1   67.91   16.39
  -4  12   1   51.50   14.99
  -3 -12   1   15.17   10.64
   3 -12  -1   20.66   11.69
  -3  12   1    9.60   11.16
   3  12  -1   32.50   12.60
  -2 -12   1   14.10    9.97
   2 -12  -1   12.58   10.45
  -2  12   1    2.84   10.46
   2  12  -1   -7.31    9.48
   1 -12  -1   68.92   13.95
  -1 -12   1   53.55   12.89
  -1  12   1   81.23   15.92
   1  12  -1   91.79   16.33
   0 -12  -1   10.26   10.19
   0 -12   1    6.45    9.18
   0  12   1   -1.00   10.02
   0  12  -1  -10.19    9.49
  -1 -12  -1   13.10    4.40
  -1 -12  -1   13.81    9.38
   1 -12   1   -5.97    9.11
  -1  12  -1   21.00   11.21
   1  12   1   12.86   11.51
   2 -12   1   15.76    9.91
  -2 -12  -1    6.76   10.44
  -2  12  -1    1.06    9.81
   2  12   1   -2.93    8.41
   3 -12   1   -5.62   10.18
  -3 -12  -1    4.51   10.59
   3  12   1   -5.44   10.18
  -3  12  -1   -1.58   10.80
   4 -12   1   22.31   11.18
  -4 -12  -1   13.21   10.52
   4  12   1   24.87   13.46
  -4  12  -1   36.44   13.02
   5 -12   1  132.87   19.21
  -5 -12  -1  125.92   19.85
   5  12   1  156.15   22.39
  -5  12  -1  151.16   22.46
   6 -12   1    7.75   12.26
  -6 -12  -1   38.26   13.76
   6  12   1   40.42   15.51
  -6  12  -1   16.19   13.54
  -7 -12  -1    1.58   11.46
   7 -12   1   26.70   15.17
  -7  12  -1   10.12   14.63
   7  12   1   31.98   15.90
   8 -12   1   -5.95   12.85
  -8 -12  -1   -0.40   13.21
  -8  12  -1   -6.62   13.70
   8  12   1  -10.24   13.57
   8 -13  -1    5.36   15.09
  -8  13   1   18.53   15.70
   8  13  -1   21.91   16.05
   7 -13  -1   -1.30   13.46
  -7 -13   1   -3.97   12.68
   7  13  -1    5.91   14.06
  -7  13   1   15.72   16.08
  -6 -13   1   28.72   13.66
   6 -13  -1   12.81   14.08
  -6  13   1  -13.39   12.67
   6  13  -1    2.80   13.08
  -5 -13   1   -6.86   10.89
   5 -13  -1   15.51   13.38
  -5  13   1   30.60   14.28
   5  13  -1   -0.08   12.05
   4 -13  -1   25.78   13.47
  -4 -13   1    8.88   11.05
  -4  13   1   18.79   12.78
   4  13  -1   44.14   15.01
  -3 -13   1   86.52   17.19
   3 -13  -1  112.18   19.25
  -3  13   1   76.53   17.14
   3  13  -1   89.98   17.64
  -2 -13   1   67.14   14.76
   2 -13  -1   78.34   16.19
  -2  13   1   71.22   16.29
   2  13  -1   75.88   15.79
   1 -13  -1  147.56   20.20
  -1 -13   1  106.04   18.41
   1  13  -1  126.26   19.80
  -1  13   1  106.59   17.61
   0 -13  -1  126.75   19.17
   0 -13   1  126.73   18.44
   0  13  -1  113.95   19.09
   0  13   1   84.37   17.09
   1 -13   1   33.18   12.11
  -1 -13  -1   29.34   12.06
   1  13   1   54.16   15.00
  -1  13  -1   28.97   12.13
  -2 -13  -1    1.14   10.33
   2 -13   1   -1.94   10.30
   2  13   1    3.93   11.03
  -2  13  -1   12.08   12.22
  -3 -13  -1   77.57   16.40
   3 -13   1   58.90   15.35
  -3  13  -1   58.82   14.62
   3  13   1   84.17   18.06
   4 -13   1   85.06   17.26
  -4 -13  -1   70.52   16.59
   4  13   1   52.39   16.70
  -4  13  -1   92.33   18.04
  -5 -13  -1   -7.25   11.57
   5 -13   1   -1.13   11.18
  -5  13  -1   28.03   15.47
   5  13   1    0.38   12.33
  -6 -13  -1  -11.33   11.64
   6 -13   1   -9.34   11.80
  -6  13  -1   -9.71   12.44
   6  13   1   -4.16   11.40
   7 -13   1   35.32   15.18
  -7 -13  -1   67.38   17.57
   7  13   1   30.53   16.08
  -7  13  -1   12.23   14.88
   8 -13   1   14.04   14.17
  -8 -13  -1   16.15   14.63
   8  13   1   23.68   15.63
  -8  13  -1   10.64   15.67
   7 -14  -1   60.05   18.13
   7  14  -1    6.72   14.93
  -7  14   1   43.34   18.36
  -6 -14   1   22.71   14.42
   6 -14  -1   45.32   16.30
  -6  14   1   45.14   17.36
   6  14  -1    9.28   14.33
  -5 -14   1  202.25   26.15
   5 -14  -1  233.35   28.77
   5  14  -1  194.40   26.78
  -5  14   1  213.52   28.64
   4 -14  -1  134.28   22.40
  -4 -14   1  113.33   20.10
  -4  14   1  103.41   20.37
   4  14  -1  118.15   21.07
  -3 -14   1   13.49   11.96
   3 -14  -1   35.17   14.67
   3  14  -1   33.66   14.17
  -3  14   1   45.65   15.68
  -2 -14   1   78.27   16.07
   2 -14  -1  120.23   19.91
   2  14  -1   99.79   18.93
  -2  14   1  139.15   20.53
  -1 -14   1  279.48   30.84
   1 -14  -1  350.70   33.41
   1  14  -1  297.23   31.07
  -1  14   1  303.01   31.36
   0 -14   1   -4.77    9.97
   0 -14  -1   -7.45   11.26
   0  14   1    6.08   11.95
   0  14  -1   12.81   12.13
   1 -14   1  289.11   29.21
  -1 -14  -1  202.82   26.05
  -1  14  -1  277.88   29.40
   1  14   1  262.42   29.13
   2 -14   1  257.44   29.07
  -2 -14  -1  304.98   31.36
   2  14   1  369.17   34.53
  -2  14  -1  282.69   31.55
   3 -14   1   44.33   14.76
  -3 -14  -1   79.09   17.35
   3  14   1   77.34   17.06
  -3  14  -1   46.26   16.21
  -4 -14  -1   39.95   14.52
   4 -14   1   20.11   14.16
  -4  14  -1   17.98   14.56
   4  14   1   10.97   13.29
  -5 -14  -1  161.83   23.77
   5 -14   1  153.32   23.58
  -5  14  -1  174.47   24.99
   5  14   1  143.37   23.69
   6 -14   1   -3.42   13.70
  -6 -14  -1   -4.57   12.77
  -6  14  -1   13.13   14.64
   6  14   1   -2.65   13.50
  -7 -14  -1    0.17   13.05
   7 -14   1  -30.95   11.12
  -7  14  -1   17.14   15.31
   7  14   1  -16.31   12.95
   7 -15  -1   -7.71   14.31
   7  15  -1   11.91   15.71
  -7  15   1    5.27   16.31
   6 -15  -1   -1.46   13.67
  -6  15   1   -3.00   15.71
   6  15  -1    7.52   14.57
  -5 -15   1   27.53   15.62
   5 -15  -1   42.23   15.64
   5  15  -1   42.02   15.83
  -5  15   1   32.30   16.61
   4 -15  -1  -13.24   12.99
  -4 -15   1    5.75   12.99
   4  15  -1   -2.48   12.69
  -4  15   1   12.22   13.88
   3 -15  -1    6.53   13.47
  -3 -15   1    9.21   11.92
  -3  15   1   28.85   14.78
   3  15  -1   -8.12   11.96
  -2 -15   1   62.82   16.76
   2 -15  -1   62.69   15.78
   2  15  -1   79.99   17.86
  -2  15   1  105.04   19.49
   1 -15  -1   45.48   15.57
  -1 -15   1   50.27   14.91
   1  15  -1   46.18   16.33
  -1  15   1   43.97   15.10
   0 -15  -1   16.69   13.29
   0 -15   1   15.51   11.79
   0  15   1   31.62   14.79
   0  15  -1    8.89   12.27
  -1 -15  -1  -10.25   10.76
   1 -15   1    2.39   11.04
  -1  15  -1    8.01   13.01
   1  15   1    3.22   12.92
   2 -15   1   23.84   13.72
  -2 -15  -1    3.89   12.58
  -2  15  -1   37.08   14.51
   2  15   1   22.23   14.07
  -3 -15  -1   81.72   18.36
   3 -15   1  109.90   19.82
   3  15   1  125.06   21.21
  -3  15  -1   72.35   17.99
  -4 -15  -1   43.85   15.88
   4 -15   1   26.05   14.94
   4  15   1   11.92   13.89
  -4  15  -1   -1.59   14.08
   5 -15   1   15.75   13.57
  -5 -15  -1    5.40   13.17
   5  15   1    2.92   13.92
  -5  15  -1    6.61   14.31
  -6 -15  -1    9.46   14.91
   6 -15   1    9.05   13.91
  -6  15  -1  -13.33   14.21
   6  15   1   -2.48   14.02
   6 -16  -1   21.26   17.60
  -6  16   1   15.91   17.79
   6  16  -1   27.67   17.22
   5 -16  -1   63.31   19.22
   5  16  -1   42.15   17.94
  -5  16   1   61.62   19.36
  -4 -16   1   26.64   16.81
   4 -16  -1   22.47   16.07
  -4  16   1   43.07   17.17
   4  16  -1   28.26   16.09
  -3 -16   1   35.21   15.04
   3 -16  -1   12.53   14.26
   3  16  -1   38.33   16.25
  -3  16   1   41.57   17.54
  -2 -16   1   59.35   17.41
   2 -16  -1   51.06   17.65
  -2  16   1   44.36   16.88
   2  16  -1   41.08   16.75
   1 -16  -1    8.34   13.73
  -1 -16   1   12.34   13.22
  -1  16   1   28.11   14.20
   1  16  -1    9.74   14.20
   0 -16  -1    2.68   13.17
   0 -16   1   24.12   13.72
   0  16  -1   -8.09   12.78
   0  16   1   11.77   13.87
   1 -16   1   78.37   17.53
  -1 -16  -1   71.39   18.02
  -1  16  -1   87.44   19.75
   1  16   1   66.95   18.85
   2 -16   1   36.48   14.82
  -2 -16  -1   17.12   13.15
  -2  16  -1   15.72   13.98
   2  16   1    9.24   13.11
   3 -16   1    5.15   14.08
  -3 -16  -1    9.66   13.67
   3  16   1  -16.76   12.28
  -3  16  -1    4.64   13.22
   4 -16   1  -14.53   12.95
  -4 -16  -1   32.89   15.41
  -4  16  -1   -5.31   13.50
   4  16   1  -16.68   11.91
  -5 -16  -1    5.34   14.50
   5  16   1   31.80   16.84
  -5  16  -1   -9.64   14.37
   4 -17  -1  106.82   21.04
   4  17  -1   52.11   19.29
  -4  17   1  110.01   23.09
   3 -17  -1  212.33   29.46
   3  17  -1  270.40   33.27
  -3  17   1  244.43   32.30
   2 -17  -1   18.22   14.68
  -2  17   1    6.45   14.29
   2  17  -1  -22.19   12.73
   1 -17  -1  103.25   20.96
  -1 -17   1   74.28   20.88
   1  17  -1   96.43   21.81
  -1  17   1   83.85   19.31
   0 -17   1  140.33   23.89
   0 -17  -1  147.38   23.89
   0  17   1   93.89   22.00
   0  17  -1  159.02   25.19
  -1 -17  -1   60.13   17.77
   1 -17   1  113.75   21.11
  -1  17  -1   18.29   15.99
   1  17   1   61.80   17.89
  -2 -17  -1  -17.36   12.20
  -2  17  -1  -13.54   11.77
   2  17   1    9.45   14.04
  -3 -17  -1   77.62   20.27
   3  17   1  103.09   21.88
  -3  17  -1   92.73   21.52
  -4 -17  -1   38.93   17.27
  -4  17  -1   56.16   18.89
   4  17   1   52.70   18.30
   3 -18  -1   -4.52   15.45
  -3  18   1   -3.84   15.31
   3  18  -1    2.25   15.19
   2 -18  -1    0.54   14.77
  -2  18   1    0.25   14.68
   2  18  -1  -13.30   14.35
   1 -18  -1    0.75   14.66
   1  18  -1   32.75   17.73
  -1  18   1   10.99   15.00
   0 -18  -1    9.67   14.59
   0  18   1  -20.09   12.29
   0  18  -1   -2.17   14.93
  -1 -18  -1    1.17   14.65
   1  18   1    5.36   16.01
  -1  18  -1  -10.02   13.83
  -2 -18  -1   -1.18   15.16
  -2  18  -1  -16.21   13.74
   2  18   1   16.82   15.84
  11   0  -2  -24.29   12.02
 -11   0   2    5.37   13.96
  10   0  -2   72.95   16.98
 -10   0   2   66.06   17.04
  -9   0   2   25.16   13.41
   9   0  -2   30.76   13.51
   8   0  -2   38.98   12.75
  -8   0   2    8.57    9.77
  -7   0   2  532.04   41.83
   7   0  -2  617.27   42.91
   6   0  -2 1264.20   75.43
  -6   0   2 1032.32   73.98
  -6   0   2 1148.42   78.96
  -5   0   2  173.31   16.03
   5   0  -2   99.79   13.75
   4   0  -2   57.33    9.23
  -4   0   2   72.88   10.07
  -3   0   2 1002.88   64.78
   3   0  -2 1059.47   64.96
   2   0  -2   47.88    6.54
  -2   0   2   55.61    6.72
  -1   0   2  188.26   12.97
   1   0  -2  195.51   14.13
   1   0  -2  195.42   13.14
   1   0  -2  208.40   13.10
   0   0  -2  466.81   29.13
   0   0  -2  479.89   29.16
   0   0  -2  489.93   29.99
   0   0  -2  485.40   29.15
  -1   0  -2 8902.13  528.34
   1   0   2 8256.79  528.21
  -1   0  -2 8624.19  528.29
   1   0   2 9377.67  568.44
  -2   0  -2  171.98   14.45
   2   0   2  161.17   13.78
  -3   0  -2  293.33   22.96
   3   0   2  311.38   22.65
   4   0   2  486.26   33.10
  -4   0  -2  440.47   33.04
   5   0   2 1225.69   76.93
  -5   0  -2 1157.51   76.85
  -6   0  -2    7.60    9.28
   6   0   2   19.10    9.35
   7   0   2   68.72   14.02
  -7   0  -2   66.45   14.20
  -8   0  -2   68.54   16.01
   8   0   2   60.36   14.53
  -9   0  -2   86.50   17.72
   9   0   2   89.87   17.90
 -10   0  -2   63.42   18.27
  10   0   2  115.31   20.55
  11   0   2  216.85   29.02
 -11   0  -2  152.58   25.05
 -11  -1   2    0.97   12.41
  11  -1  -2   26.85   15.05
 -11   1   2   14.35   15.39
  11   1  -2    9.57   15.72
  10  -1  -2   -0.75   11.38
 -10  -1   2   26.79   14.23
 -10   1   2   20.62   13.54
  10   1  -2   18.45   13.14
   9  -1  -2   40.88   13.85
  -9  -1   2   57.44   14.08
  -9   1   2   19.08   12.44
   9   1  -2   50.50   15.31
  -8  -1   2   64.58   14.33
   8  -1  -2   61.87   14.64
   8   1  -2   68.73   14.84
  -8   1   2   73.40   15.64
  -7  -1   2   92.21   14.08
   7  -1  -2   49.98   12.31
  -7   1   2   35.62   11.95
   7   1  -2   60.59   12.97
  -6  -1   2    2.74    7.57
  -6  -1   2   -0.97    5.00
   6  -1  -2   -3.11    7.85
   6   1  -2   -3.31    7.36
  -6   1   2   12.47    8.33
  -5  -1   2  281.86   22.92
  -5  -1   2  285.21   22.74
   5  -1  -2  282.61   23.25
  -5   1   2  282.89   22.76
   5   1  -2  235.78   22.66
   4  -1  -2   83.52   10.97
  -4  -1   2   98.22   10.60
  -4   1   2   77.96   10.60
   4   1  -2   86.25   11.00
   3  -1  -2   89.05   10.35
  -3  -1   2   83.38    9.87
  -3  -1   2   97.45    9.94
  -3   1   2   79.58    9.97
   3   1  -2   93.34   10.66
  -2  -1   2    3.92    4.43
   2  -1  -2    8.08    5.01
   2   1  -2   -2.94    4.54
  -2   1   2   -7.67    4.51
   2   1  -2    1.16    4.95
   1  -1  -2  204.42   13.42
  -1  -1   2  208.01   12.73
   1  -1  -2  186.28   13.38
   1  -1  -2  177.01   14.02
   1   1  -2  194.55   12.98
   1   1  -2  197.43   12.85
  -1   1   2  177.70   13.18
   1   1  -2  179.41   13.17
   1   1  -2  191.55   13.69
   0  -1   2    0.96    1.67
   0  -1  -2   -1.84    4.03
   0  -1  -2    0.62    2.92
   0  -1  -2   -1.52    3.57
   0  -1  -2   -2.17    2.56
   0  -1   2    2.87    1.31
   0   1   2   -2.30    2.29
   0   1  -2    7.02    3.58
   0   1  -2   -0.11    1.96
   0   1   2    1.90    2.60
   0   1  -2   -1.45    2.00
   1  -1   2 1218.06   73.50
  -1  -1  -2 1172.42   73.74
  -1  -1  -2 1191.95   73.74
  -1   1  -2 1188.06   73.58
  -1   1  -2 1228.98   73.56
   1   1   2 1234.69   79.20
   1   1   2 1197.51   73.76
  -2  -1  -2  254.84   19.15
   2  -1   2  254.43   18.65
   2   1   2  283.43   20.31
  -2   1  -2  243.10   19.37
   2   1   2  262.02   19.33
   3  -1   2  165.15   13.82
  -3  -1  -2  169.21   14.50
  -3   1  -2  134.74   13.23
   3   1   2  163.31   14.01
   3   1   2   99.22   12.58
   4  -1   2   25.25    8.01
  -4  -1  -2   25.22    8.15
  -4   1  -2   25.43    7.76
   4   1   2   16.92    7.39
   4   1   2   22.81    7.33
   5  -1   2  123.24   14.86
  -5  -1  -2   95.32   13.44
  -5   1  -2  148.07   16.10
   5   1   2  107.91   14.04
  -6  -1  -2  157.96   18.34
   6  -1   2  158.55   18.52
  -6   1  -2  131.43   17.49
   6   1   2  177.89   19.36
  -7  -1  -2   -3.00    9.26
   7  -1   2   -7.22    8.30
  -7   1  -2   -5.21    9.63
   7   1   2    5.15    9.63
  -8  -1  -2   12.74   11.55
   8  -1   2   20.28   11.26
   8   1   2   10.02   11.33
  -8   1  -2    3.98   11.28
  -9  -1  -2  152.24   21.97
   9  -1   2  152.84   22.16
   9   1   2  131.55   21.51
  -9   1  -2  162.21   23.25
  10  -1   2   36.66   14.38
 -10  -1  -2   35.75   14.57
 -10   1  -2   30.71   15.53
  10   1   2   56.79   16.73
 -11  -1  -2  -13.96   12.86
  11  -1   2   -1.18   13.92
 -11   1  -2    3.14   14.14
  11   1   2   22.24   15.26
 -11  -2   2   54.61   17.21
  11  -2  -2   60.60   17.03
 -11   2   2   47.44   16.51
  11   2  -2    9.90   14.98
 -10  -2   2   45.80   14.83
  10  -2  -2   51.04   15.12
 -10   2   2   19.49   13.69
  10   2  -2   79.74   18.31
  -9  -2   2   59.82   14.68
   9  -2  -2   32.38   13.32
  -9   2   2   41.65   13.37
   9   2  -2   19.92   13.50
  -8  -2   2   86.65   14.91
   8  -2  -2   63.61   13.69
  -8   2   2   67.60   14.94
   8   2  -2   57.48   13.88
  -7  -2   2  163.75   18.07
   7  -2  -2  179.64   19.61
  -7   2   2  164.39   18.76
   7   2  -2   93.97   16.08
  -6  -2   2  179.54   18.57
   6  -2  -2  139.51   17.69
  -6  -2   2  148.37   17.03
   6   2  -2  212.02   20.48
  -6   2   2  174.48   18.56
  -5  -2   2   -3.15    4.42
  -5  -2   2   -3.10    6.02
   5  -2  -2    6.68    7.64
  -5   2   2   -4.12    6.85
   5   2  -2  -14.94    6.97
  -4  -2   2   99.67   11.86
   4  -2  -2  105.06   12.61
  -4  -2   2  104.59   11.69
   4   2  -2   93.72   11.82
  -4   2   2   67.01   10.82
  -3  -2   2  243.87   20.94
   3  -2  -2  273.30   20.40
  -3  -2   2  277.05   19.98
   3   2  -2  293.64   20.83
  -3   2   2  252.45   20.30
  -2  -2   2   30.34    5.72
   2  -2  -2   32.06    6.87
  -2  -2   2   29.38    5.97
   2   2  -2   49.50    6.02
   2   2  -2   31.57    6.62
  -2   2   2   42.42    6.93
  -1  -2   2  518.33   35.29
   1  -2  -2  555.21   33.63
  -1  -2   2  545.88   33.08
   1   2  -2  496.96   33.02
   1   2  -2  548.56   32.93
   1   2  -2  505.50   33.16
  -1   2   2  518.84   33.53
   0  -2   2  469.49   32.63
   0  -2  -2  475.21   31.10
   0  -2  -2  457.49   33.33
   0  -2   2  492.88   30.50
   0  -2  -2  502.88   30.76
   0   2  -2  492.42   30.76
   0   2  -2  469.97   30.52
   0   2   2  542.00   33.42
   0   2   2  501.63   31.30
  -1  -2  -2  132.06   10.35
  -1  -2  -2  130.40   11.42
  -1  -2  -2  141.02   12.62
   1  -2   2  132.64   10.91
   1   2   2  133.26   11.73
  -1   2  -2  130.56   11.35
  -1   2  -2  125.95   11.40
   1   2   2  116.33   11.12
   2  -2   2  244.60   17.97
  -2  -2  -2  253.83   18.90
  -2  -2  -2  264.83   18.87
   2   2   2  234.59   18.81
   2   2   2  231.06   19.10
  -2   2  -2  233.32   18.73
  -3  -2  -2   78.10   10.45
   3  -2   2  125.05   11.92
   3   2   2   72.57   10.30
  -3   2  -2  117.03   12.34
   3   2   2   98.81   11.82
   4  -2   2  131.88   14.45
  -4  -2  -2  152.54   15.91
   4   2   2  142.60   15.78
  -4   2  -2  120.83   14.53
   4   2   2  207.15   17.66
   5  -2   2  109.52   13.30
  -5  -2  -2   86.25   12.86
  -5   2  -2   96.52   13.79
   5   2   2   68.74   12.20
   5   2   2   95.72   12.20
  -6  -2  -2    1.49    8.11
   6  -2   2   21.05    9.16
   6   2   2    6.28    8.77
  -6   2  -2   -9.49    8.22
  -7  -2  -2   16.34    9.91
   7  -2   2   -2.57    8.50
  -7   2  -2   -0.70    8.89
   7   2   2   23.29   10.30
   8  -2   2    0.46   10.33
  -8  -2  -2  -13.59    9.22
   8   2   2   -1.37    9.81
  -8   2  -2   -7.22   10.66
  -9  -2  -2   13.72   12.47
   9  -2   2   15.65   12.05
  -9   2  -2   -5.20   11.46
   9   2   2   -3.61   11.19
  10  -2   2    0.14   13.22
 -10  -2  -2   13.09   13.10
 -10   2  -2   15.57   14.14
  10   2   2  -11.64   12.66
  11  -2   2   66.47   19.95
 -11  -2  -2   49.72   17.57
  11   2   2   65.86   19.81
 -11   2  -2   83.03   20.53
  11  -3  -2   74.85   18.51
 -11  -3   2   63.06   18.36
 -11  -3   2   68.89   17.69
  11   3  -2   36.52   16.93
 -11   3   2   53.11   18.23
  10  -3  -2   13.15   13.58
 -10  -3   2   10.31   12.21
  10   3  -2  -11.69   12.78
 -10   3   2   -3.34   12.38
  -9  -3   2   69.86   16.01
   9  -3  -2   96.87   18.06
   9   3  -2   60.81   16.19
  -9   3   2   98.22   17.74
  -8  -3   2  181.64   21.69
   8  -3  -2  216.95   23.96
  -8   3   2  159.76   21.10
   8   3  -2  249.39   25.50
   7  -3  -2   31.15   11.36
  -7  -3   2   20.44    9.60
  -7   3   2   33.82   10.44
   7   3  -2   39.63   12.11
  -6  -3   2   54.82    9.79
   6  -3  -2   51.13   11.93
  -6  -3   2   59.21   10.90
   6   3  -2   36.61   10.47
  -6   3   2   43.32   11.00
  -5  -3   2  579.98   39.27
   5  -3  -2  562.03   39.81
  -5  -3   2  549.05   41.19
  -5   3   2  587.70   39.89
   5   3  -2  544.67   39.52
  -4  -3   2  451.20   31.64
  -4  -3   2  443.00   33.26
  -4  -3   2  438.95   31.64
   4  -3  -2  446.04   32.48
  -4   3   2  474.05   32.31
   4   3  -2  457.23   32.38
   3  -3  -2   -3.70    6.25
  -3  -3   2    6.67    5.03
  -3  -3   2    0.84    5.42
  -3   3   2   -7.74    5.83
   3   3  -2    5.99    6.62
   3   3  -2    2.45    4.47
  -2  -3   2  395.98   26.05
  -2  -3   2  366.05   27.44
   2  -3  -2  378.88   26.60
  -2   3   2  385.47   26.72
   2   3  -2  387.93   24.56
   2   3  -2  375.24   26.31
   1  -3  -2 9416.58  562.44
  -1  -3   2 8788.35  561.95
   1   3  -2 9323.44  555.04
   1   3  -2 9200.87  562.19
  -1   3   2 9999.00  562.75
   0  -3  -2   -1.10    4.11
   0  -3   2    7.48    3.99
   0  -3   2    3.16    3.93
   0  -3  -2   -1.93    4.90
   0   3   2    9.45    5.63
   0   3  -2   -0.20    3.95
   0   3   2    2.64    3.94
   0   3  -2   -0.18    4.80
  -1  -3  -2   96.44    7.89
  -1  -3  -2   66.85    8.85
  -1  -3  -2   85.82    9.90
   1  -3   2   90.97    9.10
   1   3   2  101.53   10.14
  -1   3  -2   85.48    9.38
   1   3   2  100.50   10.31
   2  -3   2  556.91   37.22
  -2  -3  -2  570.44   39.52
  -2  -3  -2  571.20   37.81
   2   3   2  581.57   37.91
   2   3   2  593.34   40.16
  -2   3  -2  530.27   37.37
  -3  -3  -2  586.12   38.82
   3  -3   2  552.04   38.07
  -3   3  -2  560.50   38.46
   3   3   2  578.12   38.71
  -4  -3  -2   26.65    8.24
   4  -3   2   38.84    9.18
  -4  -3  -2   34.24    8.61
   4   3   2   52.24   10.38
   4   3   2   37.95    8.19
  -4   3  -2   48.71    9.86
   5  -3   2  288.66   25.53
  -5  -3  -2  336.79   26.37
  -5  -3  -2  315.71   25.65
   5   3   2  337.86   26.98
   5   3   2  321.69   27.14
  -5   3  -2  341.16   26.94
   6  -3   2  400.22   32.04
  -6  -3  -2  435.22   32.73
   6   3   2  408.88   32.72
   6   3   2  404.52   33.29
  -6   3  -2  409.40   32.77
   7  -3   2  154.38   19.60
  -7  -3  -2  164.89   20.60
  -7   3  -2  182.41   20.65
   7   3   2  221.70   23.28
  -8  -3  -2   24.97   11.99
   8  -3   2    7.79   10.85
   8   3   2   36.16   12.80
  -8   3  -2   28.01   12.46
   9  -3   2   89.14   17.76
  -9  -3  -2   90.61   18.87
   9   3   2  102.37   18.53
  -9   3  -2  112.21   19.17
 -10  -3  -2   92.41   19.78
 -10  -3  -2  102.08   20.23
  10  -3   2  111.00   20.34
  10   3   2  132.15   22.52
 -10   3  -2  118.95   21.89
 -11  -3  -2    7.01   14.34
  11  -3   2    5.06   13.59
 -11  -3  -2   22.57   14.87
 -11   3  -2    6.12   16.14
  11   3   2  -30.48   12.12
 -11  -4   2   36.86   15.78
 -11  -4   2    7.37   14.69
  11  -4  -2   -0.78   14.70
 -11   4   2   57.56   18.87
  11   4  -2   24.31   16.24
 -10  -4   2   39.13   13.54
 -10  -4   2   10.22   12.20
  10  -4  -2    9.29   13.69
 -10   4   2    6.24   14.04
  10   4  -2   10.20   13.75
   9  -4  -2   56.08   15.35
  -9  -4   2   84.13   15.90
  -9  -4   2   38.45   13.03
   9   4  -2   39.48   14.99
  -9   4   2   51.54   15.03
  -8  -4   2    2.33   10.34
  -8  -4   2  -18.62    8.58
   8  -4  -2    6.61   11.17
   8   4  -2    1.81    9.98
  -8   4   2   -4.75   10.19
   7  -4  -2   83.40   15.10
  -7  -4   2  111.87   16.55
  -7  -4   2  100.57   15.61
  -7   4   2  117.17   16.02
   7   4  -2  131.29   17.79
  -6  -4   2  160.18   16.72
  -6  -4   2   95.71   14.13
   6  -4  -2  116.87   16.09
  -6  -4   2  117.97   15.59
  -6   4   2  142.72   16.77
   6   4  -2   89.15   14.76
  -5  -4   2   46.64    8.41
  -5  -4   2   40.05    9.92
   5  -4  -2   54.18   10.79
  -5  -4   2   20.15    8.17
  -5   4   2   42.98   10.57
   5   4  -2   23.71    9.09
  -4  -4   2    3.83    3.12
   4  -4  -2    6.52    7.86
  -4  -4   2   -2.42    6.13
  -4  -4   2    9.30    5.56
   4   4  -2    6.96    4.53
   4   4  -2    1.07    7.09
  -4   4   2    4.85    6.29
  -3  -4   2    0.99    5.36
   3  -4  -2    4.51    6.22
  -3  -4   2    7.96    6.35
   3   4  -2    8.38    6.73
   3   4  -2   -1.44    3.99
  -3   4   2    8.25    6.38
  -2  -4   2   -0.80    4.35
   2  -4  -2    2.31    6.34
  -2  -4   2    7.40    5.43
   2   4  -2    0.70    3.62
   2   4  -2    4.21    5.93
  -2   4   2   -0.25    5.61
  -1  -4   2  140.78   11.99
   1  -4  -2  103.79   11.49
  -1  -4   2  132.89   12.39
  -1   4   2  124.23   12.55
   1   4  -2  148.66   12.37
   0  -4  -2   61.50    8.62
   0  -4  -2   68.63    7.02
   0  -4   2   55.77    7.51
   0  -4   2   59.34    7.72
   0   4   2   70.89    9.12
   0   4   2   49.73    7.70
   0   4  -2   52.52    7.93
   1  -4   2   70.62    8.69
  -1  -4  -2   53.18    8.34
  -1  -4  -2   74.22    9.42
  -1  -4  -2   58.61    6.17
   1   4   2   56.47    8.28
   1   4   2   86.08    9.92
  -1   4  -2   45.68    7.74
  -2  -4  -2   28.05    8.11
   2  -4   2   39.80    7.82
  -2  -4  -2   39.83    7.56
  -2   4  -2   34.97    7.90
   2   4   2   25.89    6.42
   2   4   2   19.44    7.12
  -3  -4  -2  258.52   22.08
  -3  -4  -2  310.29   22.72
   3  -4   2  286.92   22.04
   3   4   2  247.25   21.73
  -3   4  -2  286.09   22.27
  -4  -4  -2  183.15   18.10
   4  -4   2  176.68   16.75
   4   4   2  161.17   17.06
   4   4   2  182.99   17.44
  -4   4  -2  162.74   17.41
  -5  -4  -2  124.81   15.88
   5  -4   2  133.52   15.65
  -5  -4  -2  179.02   18.18
   5   4   2   95.69   13.61
   5   4   2  131.89   16.03
  -5   4  -2  108.91   15.09
   6  -4   2   23.36    9.73
  -6  -4  -2   14.44    9.90
  -6  -4  -2   25.41   10.65
   6   4   2   21.85    8.42
   6   4   2   22.28   10.91
  -6   4  -2    1.60    9.26
  -7  -4  -2   50.07   13.02
  -7  -4  -2   53.22   13.00
   7  -4   2   38.01   10.99
  -7   4  -2   41.45   13.13
   7   4   2   36.62   12.19
   8  -4   2   41.87   13.98
  -8  -4  -2   26.76   12.07
  -8  -4  -2   21.02   11.25
  -8   4  -2   22.96   13.05
   8   4   2   66.19   15.59
  -9  -4  -2    0.42   12.63
  -9  -4  -2   19.75   12.85
   9  -4   2   -6.02   11.20
   9   4   2    4.67   12.47
  -9   4  -2  -13.23   10.62
  10  -4   2  -14.53   11.56
 -10  -4  -2  -14.26   12.20
 -10  -4  -2   11.75   13.31
  10   4   2   27.18   15.17
 -10   4  -2    3.48   12.82
  11  -4   2   25.93   16.07
 -11  -4  -2   45.57   17.27
 -11  -4  -2   30.71   17.09
 -11   4  -2   25.86   17.13
  11   4   2   27.29   16.32
 -11  -5   2   24.86   14.70
  11  -5  -2  -19.12   12.34
  11   5  -2  -22.00   12.55
 -11   5   2   13.21   14.51
  10  -5  -2  -11.19   12.90
 -10  -5   2  -26.58   10.86
 -10   5   2    2.34   13.29
  10   5  -2   -7.18   12.49
  -9  -5   2    5.07   11.72
  -9  -5   2    0.36   10.99
   9  -5  -2   -9.26   11.92
  -9   5   2   23.47   13.33
   9   5  -2    9.65   11.58
   8  -5  -2  145.88   20.48
  -8  -5   2  137.63   18.56
   8   5  -2  100.89   17.84
  -8   5   2   68.98   15.86
   7  -5  -2  274.08   27.19
  -7  -5   2  215.25   23.61
   7   5  -2  258.86   26.68
  -6  -5   2    5.02    5.35
  -6  -5   2   -5.37    7.54
   6  -5  -2   20.15    8.98
  -6   5   2   -3.07    8.29
   6   5  -2   -3.25    8.58
   6   5  -2   -0.67    5.00
  -5  -5   2    4.65    5.41
  -5  -5   2    2.79    7.27
  -5  -5   2    0.77    3.63
   5  -5  -2    3.45    8.58
  -5   5   2   16.01    8.66
   5   5  -2    0.39    4.36
   5   5  -2   -5.79    7.17
  -4  -5   2   43.12    8.85
  -4  -5   2   41.56    9.08
   4  -5  -2   44.10    9.48
  -4  -5   2   49.14    5.62
   4   5  -2   48.16    6.31
  -4   5   2   61.16   10.84
   4   5  -2   61.26   10.73
  -3  -5   2   14.90    7.12
  -3  -5   2    7.74    5.03
   3  -5  -2   14.01    7.76
   3   5  -2   15.75    4.09
  -3   5   2   19.14    8.30
   3   5  -2    7.27    7.30
  -2  -5   2  389.88   26.14
   2  -5  -2  392.10   27.17
  -2  -5   2  377.33   27.81
  -2   5   2  321.58   26.44
   2   5  -2  357.15   26.49
  -1  -5   2   11.52    6.01
   1  -5  -2   13.95    6.90
  -1  -5   2   14.46    5.98
   1   5  -2    5.51    6.73
  -1   5   2   19.09    6.96
  -1   5   2   15.12    6.64
   0  -5   2  687.11   48.11
   0  -5  -2  697.50   45.61
   0  -5  -2  725.90   43.54
   0  -5   2  680.36   44.87
   0   5   2  702.73   48.45
   0   5   2  716.07   45.90
   0   5  -2  662.72   45.30
   1  -5   2   61.88    9.00
  -1  -5  -2   77.40   10.02
  -1  -5  -2   80.73    6.93
  -1   5  -2   66.98    9.53
   1   5   2   51.15    9.34
   1   5   2   77.75   10.07
  -2  -5  -2    2.04    6.82
  -2  -5  -2    7.82    6.31
   2  -5   2    9.44    6.26
  -2   5  -2    1.39    6.91
   2   5   2    4.52    6.14
   2   5   2    2.01    7.17
  -3  -5  -2   77.00   10.51
  -3  -5  -2   68.34   11.22
   3  -5   2   93.97   12.02
   3   5   2   90.52   11.57
  -3   5  -2   98.38   12.45
   3   5   2   54.27   10.32
  -4  -5  -2   57.22   11.10
   4  -5   2   83.63   12.17
  -4  -5  -2   66.76   10.17
   4   5   2   54.82   11.31
  -4   5  -2   59.26   10.87
   4   5   2   74.35   11.27
  -5  -5  -2   78.65   11.45
   5  -5   2   64.09   12.13
  -5  -5  -2   63.88   12.01
   5   5   2   80.34   11.97
   5   5   2   46.59   11.16
  -5   5  -2   51.69   12.14
  -6  -5  -2   64.08   12.99
   6  -5   2   82.35   13.90
  -6   5  -2   58.47   14.15
   6   5   2   72.67   14.37
   7  -5   2   96.62   16.14
  -7  -5  -2   54.71   14.28
  -7   5  -2   91.81   16.90
   7   5   2   79.88   15.38
   8  -5   2   -5.83   10.18
  -8  -5  -2   -7.28   10.56
   8   5   2   -5.19   10.78
  -8   5  -2   10.35   13.07
   9  -5   2   36.66   14.72
  -9  -5  -2    3.25   13.10
  -9   5  -2   55.45   16.28
   9   5   2   12.59   13.06
 -10  -5  -2    0.74   12.68
  10  -5   2    9.88   13.47
 -10   5  -2    8.42   14.30
  10   5   2    5.49   12.98
  11  -5   2   -4.05   14.05
 -11  -5  -2   -8.19   14.12
  11   5   2   -0.84   13.73
 -11   5  -2   20.43   16.32
  11  -6  -2   47.40   17.59
 -11   6   2   42.28   17.93
  11   6  -2   64.79   18.09
 -10  -6   2  179.63   25.24
  10  -6  -2  152.13   23.77
 -10   6   2  162.81   24.29
  10   6  -2  187.93   26.05
   9  -6  -2   61.15   16.90
  -9  -6   2   52.33   14.74
   9   6  -2   49.06   15.48
  -9   6   2   67.98   17.08
  -8  -6   2   -5.72    9.70
   8  -6  -2   -8.48   10.32
  -8   6   2  -25.30    9.29
   8   6  -2    4.94   10.99
  -7  -6   2   52.84   13.02
   7  -6  -2   78.78   15.19
   7   6  -2   82.94    9.82
   7   6  -2   96.07   16.31
  -7   6   2   76.49   14.59
  -6  -6   2  171.81   18.97
   6  -6  -2  167.83   19.63
  -6  -6   2  148.08   13.52
   6   6  -2  162.67   13.44
   6   6  -2  164.76   19.94
  -6   6   2  150.98   18.83
  -5  -6   2    2.86    5.76
   5  -6  -2    8.06    7.92
  -5  -6   2    4.52    7.17
  -5  -6   2    1.45    3.70
   5   6  -2    0.22    7.83
   5   6  -2   -0.98    4.04
  -5   6   2  -20.34    7.45
  -4  -6   2  449.46   33.82
  -4  -6   2  394.68   31.99
   4  -6  -2  481.88   33.55
   4   6  -2  405.17   32.59
   4   6  -2  475.44   28.22
  -4   6   2  416.17   33.16
   3  -6  -2 3753.06  225.22
  -3  -6   2 3767.78  241.64
  -3  -6   2 3642.79  224.64
   3   6  -2 3656.28  224.95
   3   6  -2 3664.33  218.99
  -3   6   2 3575.72  225.11
  -2  -6   2   -4.20    5.05
   2  -6  -2    3.81    6.83
  -2  -6   2    2.01    5.90
  -2   6   2    3.02    7.45
   2   6  -2   -0.69    6.76
  -1  -6   2   81.43   10.25
  -1  -6   2   63.01    9.35
   1  -6  -2   77.10   10.86
   1   6  -2   82.21   10.91
  -1   6   2   54.39    9.32
  -1   6   2   66.10   10.74
   0  -6   2   81.66   10.45
   0  -6  -2   84.93   11.08
   0  -6   2  102.35   11.33
   0   6  -2  106.06   12.43
   0   6   2  106.40   11.78
   0   6   2   96.12   12.41
  -1  -6  -2  309.82   20.25
   1  -6   2  303.28   22.91
  -1  -6  -2  319.62   23.65
   1   6   2  320.03   24.71
   1   6   2  309.16   24.76
  -1   6  -2  296.12   23.79
   2  -6   2  110.55   12.74
  -2  -6  -2   96.89   12.20
  -2  -6  -2   94.50   12.94
   2   6   2  107.29   13.51
  -2   6  -2   96.84   12.96
   2   6   2  130.47   13.85
   3  -6   2   96.73   12.45
  -3  -6  -2   93.17   12.81
  -3  -6  -2   84.24   11.43
   3   6   2   93.87   12.92
  -3   6  -2  131.21   14.65
   3   6   2   88.42   11.84
   4  -6   2  592.03   40.95
  -4  -6  -2  563.90   41.49
  -4  -6  -2  622.33   41.50
   4   6   2  557.71   41.31
  -4   6  -2  537.98   40.93
   4   6   2  603.33   43.18
   5  -6   2  130.34   16.92
  -5  -6  -2  149.68   16.42
  -5  -6  -2  112.54   15.86
  -5   6  -2  147.61   17.52
   5   6   2  152.89   18.20
  -6  -6  -2   14.08    7.98
   6  -6   2   19.51    9.64
  -6  -6  -2    2.70    9.35
   6   6   2    4.15    9.47
  -6   6  -2    2.76    9.86
  -7  -6  -2  148.44   21.44
  -7  -6  -2  192.99   20.70
   7  -6   2  181.91   22.78
   7   6   2  175.85   22.72
  -7   6  -2  177.89   23.02
  -8  -6  -2  354.75   29.95
  -8  -6  -2  305.68   32.11
   8  -6   2  400.81   33.49
  -8   6  -2  327.20   33.01
   8   6   2  318.40   33.44
   9  -6   2   -8.37   11.46
  -9  -6  -2  -33.79    9.59
   9   6   2   -4.82   12.30
  -9   6  -2   -4.95   12.82
 -10  -6  -2   -4.79   12.99
  10  -6   2    1.61   13.88
 -10   6  -2   -6.77   13.77
  10   6   2   -3.38   12.92
  11  -7  -2   -2.62   14.17
  11   7  -2   -6.36   14.49
 -11   7   2   15.36   14.76
  10  -7  -2   15.17   14.62
 -10  -7   2   18.02   14.43
  10   7  -2    5.04   14.23
 -10   7   2   14.77   15.22
  -9  -7   2  103.17   18.97
   9  -7  -2  136.11   21.20
   9   7  -2  155.61   22.90
  -9   7   2  107.01   20.13
  -8  -7   2  276.27   27.75
   8  -7  -2  284.23   29.71
  -8   7   2  249.68   27.93
   8   7  -2  220.08   26.86
  -7  -7   2  483.81   38.03
   7  -7  -2  545.82   39.62
   7   7  -2  422.48   38.23
  -7   7   2  482.26   39.24
   6  -7  -2   14.68   10.32
  -6  -7   2   27.93    9.95
   6   7  -2    9.54   10.19
  -6   7   2   11.09   10.67
  -5  -7   2  138.20   17.92
   5  -7  -2  215.13   21.77
  -5  -7   2  208.96   21.17
   5   7  -2  175.85   13.06
  -5   7   2  208.99   21.30
   5   7  -2  141.12   18.55
   4  -7  -2   10.93    9.00
  -4  -7   2    7.71    6.60
  -4  -7   2   21.09    8.37
   4   7  -2   35.14    9.48
  -4   7   2   18.73    9.81
   4   7  -2   18.64    3.66
  -3  -7   2  544.13   37.46
  -3  -7   2  542.94   39.68
   3  -7  -2  528.51   38.14
  -3   7   2  550.89   38.71
   3   7  -2  508.11   37.79
  -2  -7   2   81.47   11.50
  -2  -7   2  100.92   12.01
   2  -7  -2  118.00   13.82
  -2   7   2   87.72   12.93
   2   7  -2   90.31   12.25
  -1  -7   2   16.87    6.76
   1  -7  -2   21.75    7.83
  -1  -7   2   21.30    7.17
  -1   7   2   -0.25    6.12
  -1   7   2   11.53    7.94
   1   7  -2   11.08    7.18
   0  -7   2   90.74   11.77
   0  -7  -2   70.23   11.32
   0  -7   2   85.90   11.13
   0   7   2   79.35   12.19
   0   7  -2   77.27   11.72
   0   7   2  103.77   12.64
   1  -7   2   10.10    6.71
  -1  -7  -2   14.30    3.91
  -1  -7  -2    8.19    7.42
   1   7   2   16.89    8.04
  -1   7  -2   12.55    7.68
   1   7   2    0.06    6.37
  -2  -7  -2  241.15   14.86
   2  -7   2  236.44   19.78
  -2  -7  -2  204.29   20.63
   2   7   2  250.08   21.12
  -2   7  -2  229.67   20.58
   2   7   2  198.31   20.69
  -3  -7  -2   36.17   10.20
   3  -7   2   32.35    9.21
  -3  -7  -2   26.10    7.96
  -3   7  -2   54.78   11.22
   3   7   2   29.31    9.16
   3   7   2   47.97    9.53
  -4  -7  -2  230.77   22.48
   4  -7   2  187.59   20.80
  -4  -7  -2  247.24   20.50
   4   7   2  214.46   22.15
  -4   7  -2  248.12   23.00
   4   7   2  227.46   21.87
  -5  -7  -2   62.81   12.41
   5  -7   2   85.22   13.94
  -5  -7  -2   61.80   10.90
  -5   7  -2   65.61   12.61
   5   7   2   65.84   12.65
  -6  -7  -2   15.18   10.95
   6  -7   2    1.20    9.43
  -6  -7  -2   10.60    8.53
  -6   7  -2   12.26   10.22
   6   7   2   15.91   10.98
   7  -7   2   42.05   12.79
  -7  -7  -2   73.94   13.36
  -7  -7  -2   41.91   13.60
   7   7   2   25.51   13.23
  -7   7  -2   41.59   14.10
  -8  -7  -2   21.23   12.66
  -8  -7  -2   -6.75    9.72
   8  -7   2    8.07   11.93
   8   7   2  -13.43   10.88
  -8   7  -2    1.74   12.39
  -9  -7  -2   -3.71   12.13
   9  -7   2    4.44   12.89
   9   7   2   25.66   14.34
  -9   7  -2   -3.99   13.37
 -10  -7  -2  -10.43   13.17
  10  -7   2   14.39   14.24
  10   7   2    3.24   14.40
 -10   7  -2    5.12   15.10
  10  -8  -2  -13.31   13.25
 -10  -8   2    1.85   14.56
 -10   8   2    4.19   13.28
  10   8  -2   -5.74   13.24
   9  -8  -2  -13.32   12.17
  -9  -8   2    1.41   11.90
   9   8  -2   -4.93   12.21
  -9   8   2   14.53   13.73
   8  -8  -2    9.00   12.66
  -8  -8   2   -0.59   10.66
   8   8  -2    8.48   12.68
  -8   8   2   -0.72   12.13
  -7  -8   2   15.87   11.19
   7  -8  -2   19.36   12.24
  -7   8   2   24.53   11.71
   7   8  -2   25.66   12.15
   6  -8  -2  365.92   31.40
  -6  -8   2  355.63   30.21
   6   8  -2  346.20   30.87
  -6   8   2  346.40   31.04
  -5  -8   2   32.68    8.84
  -5  -8   2   11.14    8.60
   5  -8  -2   18.75   10.26
  -5   8   2   22.31   10.65
   5   8  -2   27.91    9.98
   4  -8  -2   95.87   14.34
  -4  -8   2  101.13   14.32
  -4  -8   2   99.44   13.38
  -4   8   2   74.52   13.98
   4   8  -2   90.15   13.87
   3  -8  -2    1.61    8.03
  -3  -8   2    3.01    7.27
  -3  -8   2    4.04    5.90
  -3   8   2   -1.97    8.29
   3   8  -2   -2.68    7.79
   2  -8  -2  135.80   16.18
  -2  -8   2  144.16   15.89
  -2  -8   2  130.54   15.22
  -2   8   2  110.82   15.09
   2   8  -2  144.94   16.89
  -2   8   2  142.94   16.32
  -1  -8   2   55.37    9.52
   1  -8  -2   36.92    9.48
  -1  -8   2   49.18    8.59
   1   8  -2   35.07    9.75
  -1   8   2   26.54    8.41
  -1   8   2   67.04   11.59
   0  -8   2   94.76   12.51
   0  -8  -2   93.74   13.24
   0  -8   2   97.80   12.86
   0   8   2  113.31   14.59
   0   8   2  101.92   13.67
   0   8  -2  113.75   14.65
  -1  -8  -2  153.07   11.83
   1  -8   2  143.08   15.89
  -1  -8  -2  166.33   17.86
  -1   8  -2  173.47   17.87
   1   8   2  163.13   16.82
   1   8   2  154.24   17.51
   2  -8   2  147.42   16.53
  -2  -8  -2  145.06   16.92
  -2  -8  -2  183.05   11.37
  -2   8  -2  169.38   17.73
   2   8   2  174.78   18.66
   2   8   2  165.74   17.74
  -3  -8  -2   58.66   12.20
   3  -8   2   69.14   11.93
   3   8   2   56.70   12.31
  -3   8  -2   89.30   13.53
  -4  -8  -2  159.58   18.37
   4  -8   2  128.85   16.15
  -4  -8  -2  140.69   15.44
   4   8   2  129.95   17.10
   4   8   2  117.34   15.21
  -4   8  -2  129.64   17.02
  -5  -8  -2  203.70   22.39
  -5  -8  -2  191.74   19.81
   5  -8   2  210.76   21.89
   5   8   2  174.35   21.31
  -5   8  -2  163.72   20.43
  -6  -8  -2   11.39    8.03
   6  -8   2   -6.71    9.15
  -6  -8  -2   -3.61   10.23
   6   8   2    8.86   10.55
  -6   8  -2   -2.80    9.94
  -7  -8  -2   99.42   15.12
  -7  -8  -2   89.57   17.19
   7  -8   2   88.96   17.04
  -7   8  -2   98.41   18.63
   7   8   2   95.86   17.59
   8  -8   2   10.42   12.72
  -8  -8  -2   -0.28   11.78
  -8   8  -2   22.05   14.15
   8   8   2   -0.54   12.24
   9  -8   2   -0.62   12.99
  -9  -8  -2   -7.26   12.65
  -9   8  -2    8.06   14.84
   9   8   2   10.15   13.98
 -10  -8  -2   30.01   16.62
  10  -8   2   20.46   15.25
  10   8   2   23.13   17.16
 -10   8  -2   13.45   15.27
  10  -9  -2   30.44   17.48
 -10   9   2   21.47   17.01
  10   9  -2   30.05   16.74
   9  -9  -2  181.22   25.29
  -9  -9   2  172.78   24.51
   9   9  -2  161.88   25.60
  -9   9   2  224.13   27.96
  -8  -9   2  176.13   23.29
   8  -9  -2  130.76   21.19
   8   9  -2  181.88   24.60
  -8   9   2  163.00   23.57
  -7  -9   2   12.10   10.86
   7  -9  -2   -4.83   10.42
   7   9  -2    4.82   11.09
  -7   9   2   -5.89   11.00
  -6  -9   2  168.82   19.85
   6  -9  -2  145.75   20.27
  -6   9   2  124.96   19.24
   6   9  -2  161.38   20.75
   5  -9  -2  208.94   24.10
  -5  -9   2  255.99   24.63
   5   9  -2  244.11   25.60
  -5   9   2  270.44   27.30
  -4  -9   2   58.45   10.45
  -4  -9   2   29.04    9.96
   4  -9  -2   22.10    9.64
  -4   9   2   27.23   10.71
   4   9  -2   23.62   10.45
   3  -9  -2   13.21    8.18
  -3  -9   2   17.46    7.32
  -3  -9   2    8.96    8.06
   3   9  -2    0.65    8.16
  -3   9   2   17.98    9.49
   2  -9  -2   11.28    8.33
  -2  -9   2    1.19    5.64
  -2  -9   2   -1.21    6.76
  -2   9   2    7.99    8.67
   2   9  -2   -5.66    7.89
  -2   9   2   -6.79    6.47
  -1  -9   2  459.15   38.34
  -1  -9   2  507.81   36.43
   1  -9  -2  507.71   37.12
  -1   9   2  504.82   37.36
   1   9  -2  522.73   37.34
  -1   9   2  557.09   39.27
   0  -9   2  100.54   13.66
   0  -9  -2  123.77   15.65
   0  -9   2   90.32   12.93
   0   9   2  110.56   14.59
   0   9  -2  109.79   14.83
   0   9   2   94.06   14.59
  -1  -9  -2  114.49   15.00
   1  -9   2  162.87   16.32
  -1  -9  -2  114.42   10.32
   1   9   2  164.88   17.44
  -1   9  -2  118.99   15.24
   1   9   2  130.96   16.70
  -2  -9  -2  753.22   44.82
  -2  -9  -2  730.40   51.28
   2  -9   2  710.30   50.31
   2   9   2  756.10   51.93
  -2   9  -2  732.56   51.21
  -3  -9  -2  291.92   25.57
   3  -9   2  270.45   24.33
  -3   9  -2  282.79   25.29
   3   9   2  282.32   25.60
   4  -9   2    2.33    8.48
  -4  -9  -2   -6.47    8.18
  -4   9  -2   -3.14    8.76
   4   9   2    0.06    9.12
  -5  -9  -2   66.08   13.93
  -5  -9  -2   95.80   13.60
   5  -9   2   87.77   14.84
  -5   9  -2   90.99   15.83
   5   9   2   93.76   15.32
  -6  -9  -2   77.92   15.40
   6  -9   2  113.14   18.08
  -6  -9  -2  120.23   15.24
  -6   9  -2   82.90   15.53
   6   9   2   98.54   17.17
   7  -9   2   40.12   13.27
  -7  -9  -2   59.26   15.56
  -7   9  -2   52.40   15.52
   7   9   2   63.34   16.47
  -8  -9  -2    6.67   12.69
   8  -9   2   -3.11   10.72
   8   9   2   16.07   13.52
  -8   9  -2   20.59   14.67
   9  -9   2   49.65   16.98
  -9  -9  -2   43.77   17.19
  -9   9  -2   24.58   16.01
   9   9   2   39.03   17.13
 -10  -9  -2  109.02   23.13
  10  -9   2  133.56   25.90
 -10   9  -2  102.39   22.79
  10   9   2   95.08   21.63
  10 -10  -2   73.02   19.15
  10  10  -2   74.98   19.94
 -10  10   2   68.72   20.98
   9 -10  -2   -1.39   13.67
  -9  10   2    9.65   15.19
   9  10  -2   18.18   14.97
  -8 -10   2   23.93   13.20
   8 -10  -2    2.04   12.61
   8  10  -2   -9.89   12.10
  -8  10   2    5.52   13.54
   7 -10  -2   37.00   13.69
  -7 -10   2   30.89   13.34
   7  10  -2   14.58   12.14
  -7  10   2   16.93   12.54
  -6 -10   2   -0.34    9.60
   6 -10  -2    5.37   10.98
   6  10  -2    1.77   10.30
  -6  10   2   11.76   11.27
  -5 -10   2  432.46   33.62
   5 -10  -2  376.02   34.00
  -5  10   2  418.22   35.56
   5  10  -2  396.97   34.27
   4 -10  -2   12.56   10.34
  -4 -10   2  -10.65    7.40
  -4  10   2   18.16   10.21
   4  10  -2   15.84   10.15
  -3 -10   2  117.29   16.09
  -3 -10   2  106.60   14.93
   3 -10  -2  131.53   17.62
   3  10  -2   90.34   15.42
  -3  10   2   87.62   14.99
  -2 -10   2  157.78   18.04
   2 -10  -2  204.98   20.58
  -2 -10   2  129.37   17.14
  -2  10   2  155.37   18.81
  -2  10   2  232.49   22.26
   2  10  -2  170.88   19.46
  -1 -10   2   -1.43    7.42
  -1 -10   2   -2.75    5.25
   1 -10  -2   -5.88    7.71
  -1  10   2    4.81    6.59
  -1  10   2   -7.14    7.06
   1  10  -2  -16.05    7.08
   0 -10  -2   19.26    9.79
   0 -10   2   33.70    8.71
   0 -10   2   37.13    9.93
   0  10   2   41.19   10.08
   0  10  -2   27.56   10.19
   0  10   2   43.11   10.85
  -1 -10  -2   83.06   13.45
  -1 -10  -2  113.64    9.38
   1 -10   2   95.74   13.80
   1  10   2  121.81   15.37
  -1  10  -2   90.56   14.37
   1  10   2   73.73   13.57
  -2 -10  -2   13.98    9.65
   2 -10   2    2.50    7.75
   2  10   2   11.18    9.83
  -2  10  -2    5.49    8.55
   3 -10   2   61.00   12.27
  -3 -10  -2   64.66   13.05
  -3  10  -2   81.88   14.45
   3  10   2   45.38   12.27
   4 -10   2   63.11   12.92
  -4 -10  -2   20.39   10.46
   4  10   2   41.42   12.74
  -4  10  -2   55.08   13.89
  -5 -10  -2   -0.52    8.98
   5 -10   2   10.94   10.24
  -5  10  -2    4.94   10.47
   5  10   2    2.88   10.28
  -6 -10  -2   14.03    9.45
  -6 -10  -2  -21.62    8.74
   6 -10   2   -3.58   10.50
   6  10   2   -8.11   10.94
  -6  10  -2   -5.66   10.90
   7 -10   2   20.31   12.88
  -7 -10  -2   28.68   13.48
   7  10   2   13.67   12.66
  -7  10  -2   21.84   14.64
  -8 -10  -2  251.54   28.76
   8 -10   2  150.83   22.88
   8  10   2  136.34   23.10
  -9 -10  -2  -10.53   13.28
   9 -10   2  -18.32   12.50
  -9  10  -2   17.12   15.76
   9  10   2  -12.94   13.56
   9 -11  -2   82.89   18.91
  -9  11   2   45.46   18.73
   9  11  -2   83.01   20.64
  -8 -11   2    1.01   12.23
   8 -11  -2   -4.05   12.93
  -8  11   2    0.94   14.16
   8  11  -2    1.30   12.62
  -7 -11   2   -7.18   10.80
   7 -11  -2    6.52   11.65
   7  11  -2   -0.12   12.03
  -7  11   2   -7.69   12.57
  -6 -11   2   53.55   14.74
   6 -11  -2   54.46   15.58
  -6  11   2  109.04   19.52
   6  11  -2  102.43   18.50
  -5 -11   2    9.23   10.72
   5 -11  -2    5.07   11.24
   5  11  -2    7.88   11.63
  -5  11   2   -4.69   11.95
  -4 -11   2    0.46    9.55
   4 -11  -2    9.39   10.89
  -4  11   2   15.51   11.79
   4  11  -2   -7.54    9.60
   3 -11  -2    1.08   10.01
  -3 -11   2   24.87   10.30
   3  11  -2   13.45   10.98
  -3  11   2   23.24   11.28
  -2 -11   2   22.56    9.50
   2 -11  -2    5.10   10.03
  -2  11   2    6.21   10.84
   2  11  -2    3.89    9.49
  -1 -11   2    3.27    8.35
  -1 -11   2   28.87    9.03
   1 -11  -2   10.83    9.27
  -1  11   2   21.77   10.65
   1  11  -2   13.32   10.30
   0 -11   2   22.57    9.25
   0 -11   2   32.27    8.88
   0 -11  -2   28.69   10.09
   0  11   2   29.01   11.11
   0  11  -2   22.10   11.31
  -1 -11  -2  167.52   13.50
  -1 -11  -2  204.90   21.83
   1 -11   2  217.64   21.02
   1  11   2  150.66   20.17
  -1  11  -2  175.28   20.63
   2 -11   2   87.23   14.43
  -2 -11  -2  102.68   15.82
   2  11   2   70.66   13.95
  -2  11  -2   84.87   14.30
  -3 -11  -2   62.69   14.17
   3 -11   2   64.65   13.19
   3  11   2   55.92   14.99
  -3  11  -2   83.57   15.39
  -4 -11  -2   30.17   11.98
   4 -11   2   26.52   12.31
  -4  11  -2   28.10   12.83
   4  11   2   30.33   13.05
  -5 -11  -2   56.75   14.88
   5 -11   2    9.10   11.78
   5  11   2   23.24   13.16
  -5  11  -2   26.58   13.75
   6 -11   2   19.29   11.61
  -6 -11  -2   10.13   12.37
  -6  11  -2   11.64   12.96
   6  11   2   12.82   13.32
   7 -11   2   33.17   13.61
  -7 -11  -2   27.54   14.26
   7  11   2   13.01   13.01
  -7  11  -2   18.74   14.27
   8 -11   2   32.02   14.91
  -8 -11  -2    5.45   13.10
  -8  11  -2  -11.39   13.16
   8  11   2  -10.10   12.38
  -9 -11  -2   13.32   14.90
   9  11   2   -9.76   13.82
  -9  11  -2   14.41   16.24
   9 -12  -2   49.14   18.04
  -9  12   2   53.87   20.12
   9  12  -2   39.78   17.58
   8 -12  -2   32.39   16.44
   8  12  -2   23.02   14.98
  -8  12   2   56.08   19.19
   7 -12  -2  435.37   39.23
  -7 -12   2  335.83   35.27
  -7  12   2  358.27   37.66
   7  12  -2  320.63   35.79
   6 -12  -2  113.55   20.19
  -6 -12   2  102.52   17.98
   6  12  -2  113.99   20.01
  -6  12   2   92.90   19.60
  -5 -12   2   -0.34   10.27
   5 -12  -2   -9.73   10.91
   5  12  -2   -6.17   10.80
  -5  12   2    0.86   12.87
   4 -12  -2   15.29   11.09
  -4 -12   2   29.45   12.01
  -4  12   2   14.64   11.85
   4  12  -2   38.21   13.56
   3 -12  -2   17.50   12.17
  -3 -12   2   78.60   14.32
  -3  12   2   49.98   14.38
   3  12  -2   62.86   15.02
   2 -12  -2   49.18   13.23
  -2 -12   2   68.01   13.61
  -2  12   2   92.39   16.37
   2  12  -2   54.26   13.90
   1 -12  -2   19.31    9.40
  -1 -12   2   -7.85    8.47
  -1  12   2    8.54   10.23
   1  12  -2    5.14   10.00
   0 -12  -2   74.14   14.44
   0 -12   2   97.44   15.26
   0  12   2   76.46   16.10
   0  12  -2   75.74   15.09
   1 -12   2  472.02   38.09
  -1 -12  -2  529.88   33.06
   1  12   2  480.14   39.86
  -1  12  -2  494.52   39.31
   2 -12   2   91.48   15.88
  -2 -12  -2   67.55   14.84
   2  12   2   50.58   12.92
  -2  12  -2   56.27   13.55
  -3 -12  -2   12.88   10.23
   3 -12   2   20.91   11.33
   3  12   2   31.05   12.62
  -3  12  -2   19.79   11.61
  -4 -12  -2  323.28   32.01
   4 -12   2  359.64   32.75
   4  12   2  267.59   30.82
  -4  12  -2  387.55   35.20
  -5 -12  -2  204.54   25.39
   5 -12   2  214.32   24.55
  -5  12  -2  154.75   23.62
   5  12   2  250.86   28.22
  -6 -12  -2   52.88   15.52
   6 -12   2   22.01   12.84
  -6  12  -2   41.10   15.30
   6  12   2   33.21   15.30
   7 -12   2  205.40   26.57
  -7 -12  -2  223.12   29.10
   7  12   2  243.45   29.62
  -7  12  -2  206.45   28.37
  -8 -12  -2   41.56   17.20
  -8  12  -2   46.89   17.54
   8  12   2   40.06   18.23
   8 -13  -2   10.67   14.04
   8  13  -2    0.55   13.81
  -8  13   2  -21.83   12.66
   7 -13  -2   35.55   16.86
  -7  13   2   -6.12   14.57
   7  13  -2   -8.54   13.04
   6 -13  -2   25.16   14.19
  -6 -13   2   30.97   13.40
   6  13  -2    6.84   12.27
  -6  13   2   -5.07   12.80
   5 -13  -2   92.65   17.52
  -5 -13   2   73.96   16.86
   5  13  -2   97.52   19.36
  -5  13   2   53.39   17.23
   4 -13  -2   57.79   15.79
  -4 -13   2  116.92   19.25
   4  13  -2  138.17   20.72
  -4  13   2   68.70   17.47
   3 -13  -2    0.37   11.02
  -3 -13   2   -5.11   10.25
   3  13  -2   14.90   11.70
  -3  13   2  -16.32   10.48
   2 -13  -2   23.38   11.12
  -2 -13   2   31.31   11.84
   2  13  -2   18.49   11.72
  -2  13   2   12.62   12.35
   1 -13  -2   46.28   12.14
  -1 -13   2   47.26   12.97
   1  13  -2   38.58   13.02
  -1  13   2   66.77   15.24
   0 -13  -2    1.41    9.93
   0 -13   2    1.75    9.29
   0 -13  -2   -0.38    4.76
   0  13   2   -2.37   11.67
   0  13  -2  -11.62    9.72
   1 -13   2   28.72   11.14
  -1 -13  -2   13.58   10.65
   1  13   2   26.18   12.17
  -1  13  -2   17.20   11.76
   2 -13   2   17.79   12.04
  -2 -13  -2   36.60   12.75
   2  13   2   35.05   13.21
  -2  13  -2   27.87   11.98
   3 -13   2   92.54   17.03
  -3 -13  -2   62.22   15.65
  -3  13  -2   49.59   15.65
   3  13   2   78.45   16.61
  -4 -13  -2   41.59   14.24
   4 -13   2   74.82   16.80
   4  13   2   47.77   14.63
  -4  13  -2   32.81   14.20
  -5 -13  -2    2.98   12.19
   5 -13   2   16.62   12.60
   5  13   2    2.26   13.55
  -5  13  -2   48.01   15.54
   6 -13   2  126.92   21.43
  -6 -13  -2  162.88   23.06
  -6  13  -2   90.78   20.25
   6  13   2  134.82   23.08
  -7 -13  -2    4.03   14.04
   7  13   2   27.07   14.71
  -7  13  -2   32.87   16.07
  -8 -13  -2   -0.79   13.22
  -8  13  -2    9.15   16.38
   8  13   2  -11.89   13.95
   7 -14  -2   11.64   15.95
   7  14  -2  -14.31   12.42
  -7  14   2   -9.35   13.95
   6 -14  -2   14.71   14.71
   6  14  -2   36.64   16.77
  -6  14   2   15.41   15.44
  -5 -14   2   43.09   14.55
   5 -14  -2   -8.31   11.49
   5  14  -2   60.73   17.79
  -5  14   2   18.65   15.11
   4 -14  -2  101.29   19.96
  -4 -14   2  110.70   19.26
  -4  14   2   69.00   18.36
   4  14  -2  134.87   21.31
   3 -14  -2   14.37   13.05
  -3 -14   2   20.20   12.08
  -3  14   2   20.31   13.77
   3  14  -2   12.62   12.41
  -2 -14   2   37.37   13.23
   2 -14  -2   -1.23   10.90
  -2  14   2    6.63   12.95
   2  14  -2   28.33   13.79
   1 -14  -2   -2.03   10.24
  -1 -14   2   16.91   11.34
   1  14  -2   -6.50   11.34
  -1  14   2   12.38   11.89
   0 -14   2   -0.81    9.85
   0 -14  -2   -6.18   10.67
   0  14   2   -4.89   11.36
   0  14  -2    9.69   11.37
   1 -14   2   -2.26   10.84
  -1 -14  -2    2.13   10.83
   1  14   2    4.42   11.24
  -1  14  -2    1.66   11.98
  -2 -14  -2  111.41   19.50
   2 -14   2  115.59   19.03
  -2  14  -2  113.67   19.70
   2  14   2  118.12   20.34
  -3 -14  -2   21.25   12.98
   3 -14   2   17.91   12.62
   3  14   2   -5.35   11.19
  -3  14  -2   26.45   13.28
  -4 -14  -2   48.06   15.18
   4 -14   2   39.20   15.15
  -4  14  -2   27.41   14.26
   4  14   2   50.74   16.73
   5 -14   2   26.41   14.20
  -5 -14  -2    3.58   12.52
   5  14   2   11.33   14.42
  -5  14  -2  -14.74   12.61
  -6 -14  -2    6.48   13.68
  -6  14  -2    8.95   14.51
   6  14   2   33.86   16.53
  -7 -14  -2   36.60   18.01
   7  14   2   49.37   18.58
  -7  14  -2   23.16   15.79
   7 -15  -2   34.86   17.76
   7  15  -2  -11.87   15.00
  -7  15   2   13.28   16.28
   6 -15  -2   21.74   16.05
  -6  15   2   18.33   15.80
   6  15  -2   -4.32   14.39
   5 -15  -2  127.93   23.13
   5  15  -2   98.90   21.41
  -5  15   2   94.35   20.75
   4 -15  -2   70.58   18.57
  -4  15   2   45.62   16.75
   4  15  -2   40.67   15.48
   3 -15  -2   -7.63   11.92
  -3 -15   2   12.01   12.30
  -3  15   2   -6.16   11.10
   3  15  -2    0.49   12.50
  -2 -15   2   59.75   16.67
   2 -15  -2  104.50   19.53
   2  15  -2   69.68   17.17
  -2  15   2   39.04   16.29
  -1 -15   2   45.81   15.10
   1 -15  -2   67.76   17.40
   1  15  -2   48.89   16.26
  -1  15   2   61.49   15.90
   0 -15   2   25.80   13.32
   0 -15  -2   -7.46   11.38
   0  15   2    6.47   12.17
   0  15  -2   13.02   13.01
  -1 -15  -2   59.08   15.82
   1 -15   2   66.17   15.29
  -1  15  -2   15.03   13.74
   1  15   2   58.91   17.22
   2 -15   2   94.25   19.70
  -2 -15  -2  102.85   18.92
  -2  15  -2   93.68   19.82
   2  15   2  130.77   21.55
   3 -15   2   65.32   16.07
  -3 -15  -2   91.04   18.96
  -3  15  -2   78.95   18.35
   3  15   2   95.37   19.74
  -4 -15  -2   -0.44   13.41
   4  15   2   -3.42   12.16
  -4  15  -2   -4.64   13.60
  -5 -15  -2   24.02   15.00
  -5  15  -2   33.32   17.54
   5  15   2   35.37   16.76
  -6 -15  -2   20.78   15.56
  -6  15  -2   25.38   16.63
   6  15   2   18.58   16.56
   6 -16  -2    4.70   15.71
  -6  16   2   69.89   21.25
   6  16  -2   15.70   17.30
   5 -16  -2   29.55   16.22
   5  16  -2   17.07   15.54
  -5  16   2    9.59   15.61
   4 -16  -2   32.03   15.93
  -4  16   2   16.95   16.35
   4  16  -2   32.43   16.65
   3 -16  -2  167.28   24.85
   3  16  -2   87.00   20.61
  -3  16   2  126.23   22.96
   2 -16  -2   21.44   14.26
   2  16  -2  -10.58   12.64
  -2  16   2   -6.26   11.85
   1 -16  -2  123.05   22.21
  -1  16   2  102.97   21.37
   1  16  -2   80.84   19.82
   0 -16  -2  172.96   25.13
   0  16   2  117.25   21.56
   0  16  -2  179.11   25.80
  -1 -16  -2   30.78   15.38
  -1  16  -2   24.91   14.53
   1  16   2   18.64   13.91
  -2 -16  -2   25.44   15.11
   2  16   2   31.84   15.08
  -2  16  -2   34.54   16.02
  -3 -16  -2   -1.07   11.99
  -3  16  -2    1.25   13.35
   3  16   2   12.79   14.01
  -4 -16  -2   55.70   18.39
  -4  16  -2   75.47   19.58
   4  16   2   70.95   18.87
  -5 -16  -2   -3.41   14.75
  -5  16  -2  -12.11   14.57
   5  16   2   -1.14   14.67
   4 -17  -2   37.92   17.70
   4  17  -2   26.22   16.35
  -4  17   2   43.35   18.71
   3 -17  -2   12.42   15.07
  -3  17   2   -5.89   13.19
   3  17  -2   -0.61   14.33
   2 -17  -2   62.91   17.71
  -2  17   2   72.60   19.78
   2  17  -2   61.41   19.61
   1 -17  -2    9.70   14.27
   1  17  -2   11.98   15.53
  -1  17   2  -15.53   13.89
   0 -17  -2  104.65   20.83
   0  17  -2   55.82   17.73
   0  17   2   75.63   19.78
  -1 -17  -2    9.30   14.51
   1  17   2   19.17   16.03
  -1  17  -2    4.86   14.74
  -2 -17  -2   23.49   15.71
  -2  17  -2   49.08   17.33
   2  17   2   14.82   14.74
  -3 -17  -2  -25.29   11.80
  -3  17  -2   -3.97   15.13
   3  17   2    3.53   14.17
  -4 -17  -2   17.89   15.30
  -4  17  -2   10.12   16.17
   4  17   2    1.44   13.73
   2 -18  -2   31.89   16.82
   2  18  -2   33.96   17.74
  -2  18   2   24.08   16.86
   1 -18  -2   78.88   20.55
  -1  18   2    0.76   15.17
   1  18  -2   28.44   17.37
   0 -18  -2   99.75   21.81
   0  18  -2   93.69   21.46
   0  18   2  118.25   23.98
  -1 -18  -2    2.65   14.16
   1  18   2  -11.76   14.02
  -1  18  -2   10.59   15.94
  -2 -18  -2   19.06   15.82
  -2  18  -2  -16.63   13.92
   2  18   2   28.59   16.53
 -11   0   3    2.96   13.51
  11   0  -3   11.90   14.05
  10   0  -3   -4.27   12.14
 -10   0   3   29.19   13.75
   9   0  -3   14.80   11.92
  -9   0   3    1.86   10.92
  -8   0   3    3.01    9.14
   8   0  -3    5.82   10.20
  -7   0   3    2.10    9.05
   7   0  -3   -2.62    8.72
  -7   0   3    2.76    5.55
   6   0  -3    4.74    7.09
  -6   0   3    1.99    7.12
  -5   0   3    2.04    6.84
   5   0  -3  -18.65    6.21
  -4   0   3   -3.33    6.13
   4   0  -3    2.01    6.19
   3   0  -3   -7.30    5.33
  -3   0   3    5.45    5.56
   2   0  -3   -2.05    4.19
   2   0  -3   -5.91    5.53
   2   0  -3   -1.61    4.55
  -2   0   3   -6.68    3.88
   1   0  -3   -0.72    2.77
   1   0  -3    2.50    2.75
  -1   0   3   -0.44    2.39
   1   0  -3   -2.22    4.38
   1   0  -3   -2.30    4.85
   0   0  -3    1.28    2.34
   0   0  -3   -4.10    4.27
   0   0  -3    0.86    2.26
   0   0   3   -0.36    1.70
   1   0   3    4.41    4.01
   1   0   3    3.37    3.35
  -1   0  -3   -4.70    3.85
  -1   0  -3   -0.73    4.26
   2   0   3   -4.75    5.02
   2   0   3    0.24    4.51
  -2   0  -3    4.48    5.64
   3   0   3    1.53    4.69
  -3   0  -3    3.70    6.64
   3   0   3   -1.79    5.93
  -4   0  -3    8.52    7.67
   4   0   3   -3.52    6.23
   5   0   3   10.92    7.78
  -5   0  -3    4.93    7.87
   6   0   3    4.68    8.23
  -6   0  -3   -1.32    8.76
  -7   0  -3   10.27   10.15
   7   0   3   -7.07    8.74
  -8   0  -3    6.54   11.42
   8   0   3   17.09   11.13
   9   0   3   12.92   12.01
  -9   0  -3   -2.24   11.72
  10   0   3    8.87   14.00
 -10   0  -3   -1.72   12.94
 -11   0  -3   10.88   14.64
  11   0   3    4.77   14.79
  11  -1  -3   14.23   14.84
 -11  -1   3  -10.55   12.36
 -11   1   3    3.94   13.88
  11   1  -3   17.75   13.62
 -10  -1   3   69.54   16.75
  10  -1  -3   37.39   15.14
 -10   1   3   58.20   15.55
  10   1  -3   71.57   17.73
   9  -1  -3   12.36   12.49
  -9  -1   3    3.99   10.40
   9   1  -3   13.59   11.77
  -9   1   3   -4.47   10.82
   8  -1  -3   44.09   13.06
  -8  -1   3   36.65   12.22
   8   1  -3   33.32   11.99
  -8   1   3   26.06   11.55
  -7  -1   3  392.42   30.40
  -7  -1   3  335.21   30.12
   7  -1  -3  407.14   30.69
  -7   1   3  372.15   30.40
   7   1  -3  357.73   30.70
  -6  -1   3  286.34   24.72
  -6  -1   3  295.61   24.78
   6  -1  -3  310.10   25.35
  -6   1   3  283.17   24.61
   6   1  -3  309.80   25.47
  -5  -1   3   -2.03    4.37
  -5  -1   3   -1.21    6.85
   5  -1  -3   -3.19    7.15
  -5   1   3   -1.97    6.08
   5   1  -3   -7.02    6.72
  -4  -1   3   29.51    8.08
   4  -1  -3   45.90    9.03
   4   1  -3   42.73    8.67
  -4   1   3   38.83    8.14
   3  -1  -3   22.59    6.57
  -3  -1   3   17.65    6.05
   3   1  -3   20.46    6.51
   3   1  -3   17.06    6.34
  -3   1   3   21.73    6.27
   2  -1  -3  268.32   19.45
   2  -1  -3  254.88   18.24
  -2  -1   3  261.94   17.55
   2   1  -3  251.10   17.90
   2   1  -3  260.39   18.73
  -2   1   3  251.27   18.05
   2   1  -3  242.15   18.13
  -1  -1   3  341.00   21.59
   1  -1  -3  355.91   22.50
   1  -1  -3  333.75   22.53
   1  -1  -3  352.01   23.75
   1   1  -3  354.57   21.82
   1   1  -3  350.32   23.97
  -1   1   3  365.86   22.37
   1   1  -3  342.44   21.87
   1   1  -3  325.34   23.32
   0  -1  -3   15.60    4.10
   0  -1  -3   16.92    5.17
   0  -1  -3    9.76    6.25
   0  -1  -3   15.31    3.73
   0   1  -3   26.14    6.14
   0   1  -3   20.33    2.81
   0   1   3   15.29    3.26
   0   1  -3   21.97    2.73
   0   1   3   17.38    3.71
  -1  -1  -3  244.10   16.57
  -1  -1  -3  219.50   16.46
   1  -1   3  232.84   15.72
  -1  -1  -3  209.15   16.68
  -1  -1  -3  229.71   16.61
   1   1   3  238.06   17.11
  -1   1  -3  229.34   15.91
   1   1   3  224.04   16.28
  -1   1  -3  235.97   16.19
   2  -1   3   47.54    6.88
  -2  -1  -3   31.42    6.64
   2   1   3   41.23    7.28
   2   1   3   41.69    6.73
  -2   1  -3   34.16    7.07
  -3  -1  -3    2.75    6.20
   3  -1   3   10.12    5.97
   3   1   3   -6.61    5.00
  -3   1  -3    2.01    6.38
   3   1   3   17.12    7.10
   4  -1   3  606.55   42.10
   4   1   3  589.22   42.20
   4   1   3  648.92   44.96
  -4   1  -3  646.89   42.53
  -5  -1  -3 1090.41   72.12
   5  -1   3 1135.36   71.98
   5   1   3 1096.21   72.04
  -5   1  -3 1107.97   72.38
  -6  -1  -3    0.09    8.74
   6  -1   3    4.11    8.07
   6   1   3   -1.86    7.92
  -6   1  -3   20.04    9.33
   7  -1   3   41.47   12.40
  -7  -1  -3   37.28   11.82
   7   1   3   44.95   12.20
  -7   1  -3   37.47   11.91
  -8  -1  -3   52.44   14.22
   8  -1   3   58.63   14.41
  -8   1  -3   30.30   12.45
   8   1   3   40.99   13.61
   9  -1   3   60.20   15.64
  -9  -1  -3   71.22   15.76
  -9   1  -3   44.47   15.35
   9   1   3   68.43   17.40
 -10  -1  -3   17.85   13.94
  10  -1   3   18.49   13.21
 -10   1  -3   17.23   15.01
  10   1   3   31.60   15.78
  11  -1   3  189.62   28.12
 -11  -1  -3  153.85   24.43
  11   1   3  172.13   26.91
 -11   1  -3  167.77   25.52
 -11  -2   3    3.56   13.18
  11  -2  -3    4.05   13.49
  11   2  -3    0.90   13.83
 -11   2   3  -17.77   13.66
 -10  -2   3   34.89   14.90
  10  -2  -3   36.05   14.68
 -10   2   3   22.36   14.28
  10   2  -3   28.75   15.74
  -9  -2   3   11.91   11.83
   9  -2  -3    7.69   11.37
  -9   2   3   13.56   12.07
   9   2  -3    6.17   11.82
  -8  -2   3  237.67   23.19
   8  -2  -3  188.49   22.93
   8   2  -3  175.11   22.63
  -8   2   3  191.35   22.31
   7  -2  -3   85.60   13.93
  -7  -2   3  107.64   15.06
  -7  -2   3   83.84   12.27
   7   2  -3   74.78   14.06
  -7   2   3   89.94   13.63
  -6  -2   3   38.28    9.34
   6  -2  -3   12.91    9.29
  -6  -2   3   24.58    7.30
  -6   2   3   17.42    8.56
   6   2  -3   34.83   10.25
  -5  -2   3  597.15   40.21
  -5  -2   3  525.49   37.36
   5  -2  -3  566.09   38.60
   5   2  -3  511.62   38.13
  -5   2   3  512.23   37.72
   4  -2  -3   47.66    9.04
  -4  -2   3   54.34    8.45
  -4  -2   3   40.47    7.17
   4   2  -3   52.12    8.13
  -4   2   3   53.96    8.84
   4   2  -3   52.95    9.69
  -3  -2   3   29.11    6.41
   3  -2  -3   31.78    7.57
  -3  -2   3   34.89    6.72
   3   2  -3   22.74    7.12
  -3   2   3   37.96    7.41
   3   2  -3   23.73    6.37
  -2  -2   3   73.82    7.54
   2  -2  -3   73.36    8.60
  -2  -2   3   66.52    7.50
   2   2  -3   65.71    7.86
  -2   2   3   77.16    8.64
   2   2  -3   56.89    7.62
   2   2  -3   63.09    7.50
   1  -2  -3  177.11   15.06
   1  -2  -3  175.46   13.89
  -1  -2   3  184.63   12.68
  -1  -2   3  186.16   13.35
   1   2  -3  182.98   12.95
   1   2  -3  188.24   13.09
   1   2  -3  208.91   14.45
  -1   2   3  158.91   13.77
   0  -2   3  151.24   11.27
   0  -2  -3  164.55   12.29
   0  -2  -3  178.76   14.80
   0  -2  -3  142.91   12.66
   0  -2  -3  153.29   12.73
   0  -2   3  146.52   10.79
   0   2  -3  145.40   11.24
   0   2   3  165.15   12.80
   0   2  -3  144.83   10.77
   0   2   3  162.62   12.21
  -1  -2  -3   64.29    7.70
   1  -2   3   68.51    6.98
  -1  -2  -3   84.94   10.40
  -1  -2  -3   52.99    7.26
   1   2   3   61.68    7.30
   1   2   3   66.25    8.04
  -1   2  -3   68.60    7.30
  -1   2  -3   63.87    7.42
  -2  -2  -3  642.15   42.70
   2  -2   3  628.73   42.05
  -2  -2  -3  673.71   42.74
   2   2   3  709.84   45.45
  -2   2  -3  644.02   42.43
   2   2   3  643.67   42.85
   3  -2   3  110.80   12.30
  -3  -2  -3  128.96   13.40
   3   2   3  153.06   14.23
   3   2   3  102.58   12.18
  -3   2  -3  144.46   13.95
  -4  -2  -3  124.39   13.92
   4  -2   3  124.42   13.39
   4   2   3  101.85   13.05
  -4   2  -3  148.51   14.97
   4   2   3  110.84   13.18
   5  -2   3   -4.35    6.20
  -5  -2  -3   -1.58    7.37
  -5   2  -3  -14.75    6.65
   5   2   3    5.80    6.62
   5   2   3    6.43    7.59
  -6  -2  -3  238.51   23.63
   6  -2   3  223.13   22.75
  -6   2  -3  234.67   23.86
   6   2   3  327.62   24.43
  -7  -2  -3   87.47   15.92
   7  -2   3  120.85   17.39
   7   2   3  118.96   17.32
  -7   2  -3  103.51   17.22
   8  -2   3   16.26   11.14
  -8  -2  -3   -2.36    9.77
  -8   2  -3   12.93   12.64
   8   2   3    7.59   11.48
   9  -2   3  196.58   25.21
  -9  -2  -3  186.52   23.70
   9   2   3  197.15   25.42
  -9   2  -3  208.94   26.01
 -10  -2  -3   69.10   17.81
  10  -2   3   41.33   15.49
 -10   2  -3   87.05   19.41
  10   2   3   77.22   19.02
  11  -2   3   43.54   17.72
 -11  -2  -3   33.00   16.23
  11   2   3   20.37   15.80
 -11   2  -3   33.84   17.42
  11  -3  -3   18.98   14.66
 -11   3   3   -7.63   13.13
  11   3  -3    9.92   14.25
  10  -3  -3    3.86   12.54
 -10  -3   3    0.73   11.81
 -10   3   3   19.35   13.02
  10   3  -3   15.16   14.30
   9  -3  -3  241.66   26.71
  -9  -3   3  228.34   25.00
   9   3  -3  215.98   25.55
  -9   3   3  168.23   22.98
  -8  -3   3  100.48   16.35
   8  -3  -3  105.96   18.13
   8   3  -3   66.03   15.16
  -8   3   3  105.60   16.83
  -7  -3   3   24.49    8.27
  -7  -3   3   32.02   10.21
   7  -3  -3   21.30   10.73
   7   3  -3   24.57   10.87
  -7   3   3   36.50   11.46
  -6  -3   3   15.21    6.85
  -6  -3   3   10.64    8.17
   6  -3  -3   15.94    9.72
   6   3  -3   41.72   10.75
  -6   3   3   10.72    8.24
  -5  -3   3   44.94    9.34
   5  -3  -3   69.19   11.54
  -5  -3   3   38.10    8.53
  -5  -3   3   64.39   10.20
  -5   3   3   48.26    9.98
   5   3  -3   47.56    8.23
   5   3  -3   52.12   10.99
  -4  -3   3  172.58   15.56
   4  -3  -3  150.93   16.14
  -4  -3   3  188.20   16.20
  -4  -3   3  164.29   15.76
   4   3  -3  170.73   16.93
   4   3  -3  177.32   14.63
  -4   3   3  184.98   16.96
  -3  -3   3   34.34    6.65
  -3  -3   3   45.61    7.70
   3  -3  -3   43.88    8.34
  -3   3   3   57.20    8.93
   3   3  -3   59.15    7.49
   3   3  -3   43.16    8.42
   2  -3  -3  495.68   34.13
  -2  -3   3  504.91   33.52
   2   3  -3  519.50   33.93
  -2   3   3  525.36   34.16
   2   3  -3  526.37   33.10
   1  -3  -3  624.80   39.70
  -1  -3   3  631.75   41.70
   1  -3  -3  646.11   39.61
  -1  -3   3  616.01   38.86
   1   3  -3  631.21   39.05
  -1   3   3  528.06   39.57
   1   3  -3  639.12   39.11
   1   3  -3  624.94   39.21
   0  -3   3  999.56   64.00
   0  -3  -3  943.62   60.29
   0  -3  -3  946.93   59.34
   0  -3   3  951.91   59.41
   0   3   3 1036.87   60.60
   0   3   3  977.70   64.71
   0   3  -3  914.62   59.57
   0   3  -3  966.74   59.86
  -1  -3  -3  267.74   22.55
   1  -3   3  307.57   20.10
  -1  -3  -3  287.10   20.95
  -1  -3  -3  299.39   19.81
   1   3   3  303.39   22.20
  -1   3  -3  264.06   20.25
   1   3   3  275.55   20.89
   2  -3   3    7.45    5.41
  -2  -3  -3    2.41    6.18
  -2  -3  -3    7.61    6.97
   2   3   3   -2.88    5.45
   2   3   3    1.88    5.93
  -2   3  -3    3.72    5.98
  -3  -3  -3   51.62    9.16
   3  -3   3   44.52    8.21
   3   3   3   46.16    8.37
  -3   3  -3   44.87    8.98
   3   3   3   47.53    9.42
  -4  -3  -3   -1.95    6.89
   4  -3   3    3.33    6.30
  -4  -3  -3   -6.98    6.59
  -4   3  -3    4.39    7.43
   4   3   3   -0.75    6.53
   4   3   3    2.75    6.56
  -5  -3  -3   21.04    8.86
   5  -3   3    0.29    6.98
  -5  -3  -3    8.65    8.00
   5   3   3    1.63    6.25
  -5   3  -3    5.47    7.89
   5   3   3   -1.09    7.84
  -6  -3  -3    3.30    8.28
   6  -3   3    9.28    7.58
  -6  -3  -3   -2.78    8.15
   6   3   3   10.58    8.00
  -6   3  -3    8.72    8.53
   6   3   3   -8.56    8.36
   7  -3   3   20.03   10.25
  -7  -3  -3  -13.60    8.63
  -7   3  -3   25.30   11.94
   7   3   3   -7.00    9.30
   8  -3   3   24.14   11.26
  -8  -3  -3    9.30   10.85
  -8   3  -3   13.77   13.08
   8   3   3   -2.19   10.27
   9  -3   3   11.68   11.91
  -9  -3  -3    9.26   11.99
  -9  -3  -3    5.81   10.78
   9   3   3    0.13   11.81
  -9   3  -3  -10.17   12.32
 -10  -3  -3    9.71   12.79
  10  -3   3   14.78   13.94
 -10  -3  -3   -0.45   11.99
 -10   3  -3    2.67   13.91
  10   3   3   14.56   15.25
  11  -3   3    4.98   14.40
 -11  -3  -3    6.48   13.73
 -11  -3  -3   18.72   14.32
  11   3   3    5.71   15.49
 -11   3  -3   28.19   17.12
  11  -4  -3   63.37   17.81
  11   4  -3   29.66   16.55
 -11   4   3   44.42   17.93
  10  -4  -3   -6.48   12.38
 -10  -4   3   -5.03   12.03
 -10  -4   3   -0.77   12.01
 -10   4   3    9.08   12.85
  10   4  -3   20.66   13.78
  -9  -4   3   51.47   14.85
  -9  -4   3   53.45   15.18
   9  -4  -3   67.23   16.22
  -9   4   3   67.47   16.14
   9   4  -3   84.74   17.90
  -8  -4   3  114.88   17.12
   8  -4  -3  124.60   18.56
  -8  -4   3  161.68   19.54
  -8   4   3  144.08   19.75
   8   4  -3   95.78   17.61
  -7  -4   3   -3.80    8.35
  -7  -4   3    8.80    9.01
   7  -4  -3    9.34   10.62
   7   4  -3   10.32    6.69
  -7   4   3    6.93    9.13
   7   4  -3   15.42    9.92
   6  -4  -3    0.94    8.32
  -6  -4   3   12.10    8.08
  -6  -4   3   -1.01    5.30
  -6  -4   3    6.58    7.94
  -6   4   3   -0.91    7.86
   6   4  -3   -0.66    7.86
   6   4  -3    9.55    5.68
  -5  -4   3  220.32   19.78
   5  -4  -3  176.90   19.65
  -5  -4   3  240.62   20.00
   5   4  -3  222.87   17.39
   5   4  -3  193.91   20.08
  -5   4   3  259.34   20.80
  -4  -4   3  190.34   17.17
  -4  -4   3  172.93   17.01
   4  -4  -3  216.23   19.03
   4   4  -3  217.94   18.62
   4   4  -3  173.25   14.81
  -4   4   3  166.82   17.27
  -3  -4   3  189.93   16.09
   3  -4  -3  156.10   16.00
  -3  -4   3  173.44   15.76
  -3   4   3  214.55   17.63
   3   4  -3  162.52   16.19
   3   4  -3  188.67   14.27
  -2  -4   3 1558.46  103.03
   2  -4  -3 1575.91   96.76
  -2  -4   3 1581.30   96.00
   2   4  -3 1506.69   96.16
  -2   4   3 1575.10   96.82
   2   4  -3 1546.52   94.25
   1  -4  -3 3279.19  192.69
  -1  -4   3 3050.21  208.90
  -1  -4   3 3169.39  194.29
   1  -4  -3 3252.25  195.18
  -1   4   3 3279.54  195.26
   1   4  -3 3224.14  194.68
   0  -4   3  236.18   17.22
   0  -4  -3  247.22   18.69
   0  -4  -3  234.32   17.56
   0  -4   3  243.81   18.67
   0   4   3  245.54   18.96
   0   4  -3  241.49   18.21
   1  -4   3   79.53    8.41
  -1  -4  -3   73.47    9.78
  -1  -4  -3   59.58    9.62
  -1  -4  -3   78.36    7.70
   1   4   3   42.58    7.95
  -1   4  -3   74.56    8.86
   1   4   3   65.73    8.97
  -2  -4  -3   44.68    9.57
  -2  -4  -3   78.07   10.61
   2  -4   3   56.21    8.73
  -2   4  -3   49.89    9.01
   2   4   3   57.43    8.63
   2   4   3   75.62   10.24
  -3  -4  -3  257.63   21.31
   3  -4   3  267.35   20.35
  -3  -4  -3  239.25   21.75
   3   4   3  263.15   21.61
   3   4   3  253.09   21.33
  -3   4  -3  240.32   21.21
  -4  -4  -3  513.70   37.15
   4  -4   3  495.77   36.11
   4   4   3  469.29   36.98
   4   4   3  570.56   39.26
  -4   4  -3  541.08   37.23
   5  -4   3  101.94   13.55
  -5  -4  -3   59.09   12.67
  -5  -4  -3  100.21   14.16
  -5   4  -3   68.58   12.39
   5   4   3   95.05   14.10
   5   4   3   80.96   12.20
  -6  -4  -3   84.61   13.86
  -6  -4  -3   80.29   13.84
   6  -4   3   89.74   14.57
   6   4   3   97.92   15.47
  -6   4  -3  107.15   16.79
   6   4   3  136.69   16.82
  -7  -4  -3  242.40   27.06
   7  -4   3  326.66   28.12
   7   4   3  362.57   31.78
  -7   4  -3  314.59   29.89
  -8  -4  -3   22.47   12.64
  -8  -4  -3   16.46   12.23
   8  -4   3   -3.83   10.29
   8   4   3    3.31   11.21
  -8   4  -3    6.58   11.90
   9  -4   3  131.08   21.27
  -9  -4  -3  122.85   20.71
  -9  -4  -3  132.58   20.72
   9   4   3  184.20   24.31
  -9   4  -3  139.65   23.67
 -10  -4  -3   53.88   15.68
 -10  -4  -3   29.58   14.28
  10  -4   3   37.49   15.84
  10   4   3   36.55   15.30
 -10   4  -3   31.94   15.89
 -11  -4  -3   -4.81   13.60
  11  -4   3   14.08   16.66
 -11  -4  -3    5.40   14.66
  11   4   3    1.13   13.91
 -11   4  -3  -16.73   14.43
  11  -5  -3   24.16   15.29
 -11   5   3   35.95   16.87
  11   5  -3   14.97   15.05
 -10  -5   3  310.04   33.15
  10  -5  -3  325.63   34.53
 -10   5   3  286.30   31.62
  10   5  -3  331.35   34.79
   9  -5  -3   93.14   18.47
  -9  -5   3   82.83   17.27
   9   5  -3  108.55   18.57
  -9   5   3   92.22   17.15
  -8  -5   3   30.73   11.85
   8  -5  -3   22.79   11.93
   8   5  -3   29.02    8.32
   8   5  -3   22.40   12.92
  -8   5   3   44.65   13.15
  -7  -5   3   74.76   13.87
   7  -5  -3   75.17   14.51
   7   5  -3   67.97   14.41
  -7   5   3  101.92   15.89
   7   5  -3   78.72   10.42
  -6  -5   3  140.58   11.70
  -6  -5   3  159.51   17.68
  -6  -5   3  156.33   17.63
   6  -5  -3  128.77   16.67
   6   5  -3  125.43   16.76
   6   5  -3  151.42   13.86
   5  -5  -3    8.30    8.52
  -5  -5   3   29.05    4.03
  -5  -5   3   27.45    7.96
  -5  -5   3   36.03    9.34
   5   5  -3   23.30    9.20
   5   5  -3   35.78    6.50
  -5   5   3   23.85    9.22
  -4  -5   3    6.65    5.32
  -4  -5   3    7.54    6.76
   4  -5  -3    6.89    7.13
  -4   5   3   13.39    7.60
   4   5  -3    2.67    7.37
   4   5  -3    2.49    4.53
  -3  -5   3 1517.67   91.60
   3   5  -3 1533.18   89.04
   3   5  -3 1487.61   92.07
  -3   5   3 1306.70   91.95
   2  -5  -3  737.04   52.90
  -2  -5   3  875.85   56.53
  -2  -5   3  838.74   52.51
   2   5  -3  808.90   50.71
   2   5  -3  814.70   52.94
  -2   5   3  846.98   53.61
   1  -5  -3  137.90   14.49
  -1  -5   3  161.89   14.67
  -1  -5   3  166.99   13.85
   1  -5  -3  151.13   13.97
  -1   5   3  158.24   15.01
   1   5  -3  172.00   15.05
  -1   5   3  181.05   15.89
   0  -5   3  369.58   25.95
   0  -5   3  389.37   28.30
   0  -5  -3  367.92   27.36
   0  -5  -3  394.85   25.73
   0   5   3  400.91   29.00
   0   5   3  396.41   27.69
   0   5  -3  368.13   27.04
  -1  -5  -3  887.45   55.35
   1  -5   3  818.82   54.16
  -1  -5  -3  869.30   52.64
  -1  -5  -3  848.63   58.55
   1   5   3  809.49   58.59
   1   5   3  896.61   55.71
  -1   5  -3  850.74   54.70
  -2  -5  -3  247.06   19.56
   2  -5   3  191.42   17.63
  -2  -5  -3  215.99   19.50
   2   5   3  203.35   18.29
   2   5   3  225.09   19.52
  -2   5  -3  242.35   19.04
   3  -5   3   82.41   11.43
  -3  -5  -3   96.86   12.81
  -3  -5  -3  108.31   12.91
   3   5   3   74.92   11.34
  -3   5  -3   86.44   11.97
  -4  -5  -3  515.62   40.55
  -4  -5  -3  537.03   39.91
   4  -5   3  539.73   38.84
   4   5   3  570.63   40.26
  -4   5  -3  602.26   40.17
   4   5   3  609.96   42.21
   5  -5   3   47.13   10.14
  -5  -5  -3   39.50   10.59
  -5  -5  -3   43.47    9.62
   5   5   3   19.69    8.01
   5   5   3   23.33    9.59
  -5   5  -3   31.32   10.83
   6  -5   3   50.16   11.65
  -6  -5  -3   57.13   12.65
  -6   5  -3   55.83   13.16
   6   5   3   48.75   12.89
  -7  -5  -3  282.93   28.38
   7  -5   3  257.75   26.37
  -7   5  -3  288.92   28.81
   7   5   3  280.71   28.52
  -8  -5  -3   78.41   16.83
   8  -5   3  101.07   16.65
  -8   5  -3  116.65   19.19
   8   5   3  103.01   18.83
  -9  -5  -3   43.80   15.25
   9  -5   3   15.01   13.05
  -9   5  -3    5.36   13.21
   9   5   3   12.69   12.66
  10  -5   3   -8.72   12.46
 -10  -5  -3   11.35   14.35
  10   5   3   12.01   14.34
 -10   5  -3   20.11   16.62
  11  -6  -3    8.25   14.07
 -11   6   3  -35.17   11.61
  11   6  -3   -9.97   13.04
  10  -6  -3   -6.40   12.24
 -10   6   3    2.51   14.01
  10   6  -3   12.78   13.85
  -9  -6   3   21.89   12.87
   9  -6  -3   26.99   14.59
   9   6  -3   49.86   15.39
  -9   6   3    9.49   12.76
   8  -6  -3   14.11   12.20
  -8  -6   3   18.55   12.15
  -8   6   3   36.23   13.62
   8   6  -3   10.89   11.99
   7  -6  -3  398.11   34.59
  -7  -6   3  439.23   34.23
   7   6  -3  415.57   34.72
   7   6  -3  429.77   29.39
  -6  -6   3    2.89    8.08
  -6  -6   3    9.56    6.59
   6  -6  -3   29.48   10.85
   6   6  -3   17.66    6.00
   6   6  -3    1.96    8.63
  -6   6   3   13.72    9.35
   5  -6  -3    2.43    8.34
  -5  -6   3   -6.77    4.81
  -5  -6   3   -5.60    6.59
  -5   6   3    6.55    8.40
   5   6  -3    0.44    7.75
   5   6  -3   -1.35    4.47
   4  -6  -3    7.28    7.66
  -4  -6   3   13.93    7.58
  -4  -6   3    5.22    5.31
   4   6  -3    7.17    4.42
  -4   6   3    5.63    7.55
   4   6  -3   12.87    7.86
  -3  -6   3   15.01    6.24
   3  -6  -3   12.64    7.64
  -3  -6   3    8.24    6.54
  -3   6   3   18.08    7.99
   3   6  -3    6.26    4.21
   3   6  -3    0.59    6.54
  -2  -6   3  100.12   11.34
  -2  -6   3  104.31   11.91
   2  -6  -3  113.62   13.37
   2   6  -3  129.19   13.66
  -2   6   3  125.44   13.81
   1  -6  -3  121.73   12.92
  -1  -6   3   93.94   11.12
  -1  -6   3  111.43   11.07
   1   6  -3  105.31   11.98
  -1   6   3   74.92   11.02
  -1   6   3   87.77   11.69
   0  -6   3   71.85    9.74
   0  -6  -3   72.60    8.25
   0  -6  -3   63.67    9.92
   0  -6   3   71.99    8.97
   0   6  -3   71.51   10.08
   0   6   3   62.94   10.17
   0   6   3   41.58    9.20
  -1  -6  -3  108.57    9.44
   1  -6   3  119.77   11.99
  -1  -6  -3   93.85   11.91
   1   6   3  113.16   13.37
  -1   6  -3   94.88   11.84
   1   6   3   93.88   12.41
  -2  -6  -3    4.21    3.46
   2  -6   3   -0.49    5.76
  -2  -6  -3   -5.18    6.24
  -2  -6  -3    1.35    7.00
  -2   6  -3   13.50    7.21
   2   6   3    1.65    7.07
   2   6   3    6.83    6.80
   3  -6   3   89.37   12.26
  -3  -6  -3   73.43   12.19
  -3  -6  -3  106.26   13.13
   3   6   3   95.41   12.59
   3   6   3  137.07   15.25
  -3   6  -3   99.77   13.76
  -4  -6  -3    1.20    7.18
  -4  -6  -3   17.07    8.47
   4  -6   3  -13.80    6.09
   4   6   3   -0.58    5.93
  -4   6  -3   14.17    8.86
   4   6   3   -1.58    6.88
  -5  -6  -3   29.86    9.39
  -5  -6  -3   17.69   10.34
   5  -6   3   44.61   10.64
  -5   6  -3   26.02   10.11
   5   6   3   38.13   10.42
   5   6   3   28.39    9.57
   6  -6   3   11.78    9.38
  -6  -6  -3   11.06    9.01
  -6  -6  -3   11.23    9.44
  -6   6  -3   14.37   10.32
   6   6   3   24.09   10.75
  -7  -6  -3   75.16   14.65
   7  -6   3   85.56   14.96
  -7  -6  -3   86.01   16.05
  -7   6  -3  100.64   18.12
   7   6   3   59.73   14.79
  -8  -6  -3   15.02   12.06
  -8  -6  -3    0.50   10.62
   8  -6   3   16.44   11.78
  -8   6  -3   12.83   13.29
   8   6   3  -10.65   11.46
   9  -6   3  107.59   19.62
  -9  -6  -3   81.26   18.08
  -9  -6  -3   66.27   14.41
  -9   6  -3   62.78   17.42
   9   6   3   58.91   17.40
  10  -6   3   26.37   15.58
 -10  -6  -3   10.12   13.71
 -10   6  -3    1.35   14.15
  10   6   3  -11.09   12.34
  11  -7  -3   92.26   22.21
  11   7  -3   93.00   22.45
 -11   7   3  103.34   21.58
  10  -7  -3   70.58   18.09
  10   7  -3   44.77   17.09
 -10   7   3   64.75   17.69
   9  -7  -3   17.80   13.73
  -9  -7   3    4.77   11.74
  -9   7   3   54.20   16.09
   9   7  -3   29.36   14.91
   8  -7  -3   53.61   14.71
  -8  -7   3   72.03   16.05
   8   7  -3   86.89   17.74
  -8   7   3   70.55   16.19
   7  -7  -3   96.01   17.03
  -7  -7   3  132.87   18.16
  -7   7   3  119.71   18.52
   7   7  -3  113.75   17.96
  -6  -7   3   16.67    9.39
   6  -7  -3    7.75    9.90
  -6   7   3   -7.30    9.24
   6   7  -3    5.81    9.74
   6   7  -3    3.67    4.99
   5  -7  -3  -10.66    7.99
  -5  -7   3   -4.57    4.99
  -5  -7   3    3.17    7.63
  -5   7   3    3.00    8.94
   5   7  -3    7.99    4.54
   5   7  -3   -6.28    7.52
  -4  -7   3  152.63   16.42
   4  -7  -3  155.89   17.26
  -4  -7   3  186.72   17.71
   4   7  -3  117.20   15.61
   4   7  -3  143.61   11.78
  -4   7   3  143.06   17.94
   3  -7  -3  635.70   42.41
  -3  -7   3  623.78   41.16
  -3  -7   3  512.45   43.10
   3   7  -3  599.70   41.55
  -3   7   3  655.23   42.66
  -2  -7   3   -3.37    5.39
  -2  -7   3   -0.74    5.78
   2  -7  -3   -2.54    6.07
  -2   7   3   -2.02    6.89
   2   7  -3    0.15    6.83
  -1  -7   3   32.98    7.33
  -1  -7   3   28.90    7.26
   1  -7  -3   23.25    8.21
   1   7  -3   22.22    7.95
  -1   7   3   37.14    8.57
  -1   7   3   25.43    8.22
   0  -7   3  224.32   19.74
   0  -7  -3  223.66   16.96
   0  -7   3  231.43   18.27
   0   7   3  222.26   20.67
   0   7  -3  205.07   19.78
   0   7   3  252.44   20.75
   1  -7   3  361.06   25.39
  -1  -7  -3  333.19   22.70
  -1  -7  -3  337.01   26.53
   1   7   3  340.50   26.88
   1   7   3  353.20   27.92
  -1   7  -3  330.89   26.02
  -2  -7  -3   30.58    9.31
   2  -7   3   28.51    8.01
  -2  -7  -3   43.24    5.05
  -2   7  -3   27.59    8.99
   2   7   3   12.32    8.16
   2   7   3   45.38   10.09
  -3  -7  -3  212.68   20.48
   3  -7   3  230.31   20.50
  -3  -7  -3  213.20   21.76
  -3   7  -3  213.62   21.12
   3   7   3  227.80   21.66
   3   7   3  251.38   21.70
  -4  -7  -3  196.43   20.96
  -4  -7  -3  188.12   21.65
   4  -7   3  224.81   22.00
   4   7   3  231.59   21.69
   4   7   3  253.98   23.68
  -4   7  -3  257.94   22.99
  -5  -7  -3  152.22   18.81
   5  -7   3  125.42   15.88
  -5  -7  -3  140.52   16.48
   5   7   3  118.62   17.13
  -5   7  -3  131.90   17.79
  -6  -7  -3   -5.92    8.83
  -6  -7  -3   -4.17    8.43
   6  -7   3    0.42    8.76
  -6   7  -3    0.98    9.99
   6   7   3  -11.21    8.65
  -7  -7  -3  116.89   16.85
   7  -7   3   98.59   17.23
  -7  -7  -3   56.54   14.73
   7   7   3  110.19   17.78
  -7   7  -3   91.71   17.23
  -8  -7  -3   17.97   12.29
  -8  -7  -3   17.65   13.04
   8  -7   3   -7.03   10.52
  -8   7  -3   -4.76   12.69
   8   7   3   21.20   13.61
  -9  -7  -3   35.56   14.79
   9  -7   3   29.17   14.66
  -9   7  -3   16.15   16.08
   9   7   3   19.56   15.40
 -10  -7  -3  -17.03   13.32
 -10   7  -3   -3.27   15.12
  10   7   3   -6.86   13.55
  10  -8  -3   18.11   15.07
 -10   8   3    3.38   14.08
  10   8  -3   -7.43   13.06
   9  -8  -3  171.45   24.72
   9   8  -3  175.48   24.98
  -8  -8   3  111.42   18.14
   8  -8  -3  124.70   19.43
  -8   8   3   98.14   18.17
   8   8  -3   99.11   18.50
   7  -8  -3    2.31    9.92
  -7  -8   3   15.75   10.37
  -7   8   3    9.25   11.01
   7   8  -3    1.54   10.42
  -6  -8   3   -2.14    9.23
   6  -8  -3   -1.08    9.68
  -6   8   3  -18.71    8.82
   6   8  -3    9.83    9.82
   5  -8  -3  146.49   18.68
  -5  -8   3  115.32   16.04
  -5  -8   3  131.42   16.82
  -5   8   3   88.58   15.64
   5   8  -3  128.00   17.13
  -4  -8   3  249.97   23.43
   4  -8  -3  287.86   24.81
  -4  -8   3  276.43   23.03
  -4   8   3  236.50   24.60
   4   8  -3  270.22   23.94
  -3  -8   3    6.21    6.86
  -3  -8   3    1.29    5.56
   3  -8  -3   -6.55    7.66
  -3   8   3    8.41    8.79
   3   8  -3   -6.79    7.14
  -2  -8   3    6.44    5.40
   2  -8  -3    9.22    8.05
  -2  -8   3    5.68    6.82
  -2   8   3   22.96    7.97
   2   8  -3   21.56    8.63
  -2   8   3   -0.30    7.57
  -1  -8   3  763.91   50.11
  -1  -8   3  871.27   54.07
   1  -8  -3  746.73   51.16
  -1   8   3  638.26   53.72
   1   8  -3  757.03   50.76
   0  -8   3  220.09   18.94
   0  -8  -3  206.70   21.00
   0  -8  -3  214.29   17.11
   0  -8   3  225.74   20.49
   0   8  -3  232.79   21.36
   0   8   3  248.92   21.47
   0   8   3  270.63   21.96
  -1  -8  -3    5.27    3.97
  -1  -8  -3    2.30    7.79
   1  -8   3    2.14    6.17
   1   8   3   15.58    7.83
  -1   8  -3   19.95    8.32
   1   8   3    8.99    7.58
  -2  -8  -3  505.79   31.10
   2  -8   3  479.45   35.12
  -2  -8  -3  486.00   36.26
  -2   8  -3  545.30   36.59
   2   8   3  457.76   38.17
  -3  -8  -3  162.58   16.85
  -3  -8  -3  120.72   15.92
   3  -8   3  134.15   15.46
  -3   8  -3  142.35   17.14
   3   8   3  122.74   15.07
   3   8   3  105.04   15.14
   4  -8   3    4.19    8.00
  -4  -8  -3   -8.07    6.71
  -4  -8  -3    8.73    9.40
  -4   8  -3   14.88    9.89
   4   8   3    1.71    8.02
   4   8   3    0.17    6.61
  -5  -8  -3  118.02   16.10
  -5  -8  -3  157.76   19.02
   5  -8   3  144.44   17.83
   5   8   3  107.57   17.30
  -5   8  -3  125.78   18.01
   6  -8   3   91.49   15.16
  -6  -8  -3   71.67   13.16
  -6  -8  -3   39.27   12.64
   6   8   3   45.49   12.74
  -6   8  -3   75.28   14.84
   7  -8   3   66.31   14.62
  -7  -8  -3   73.30   14.66
  -7  -8  -3   73.97   15.77
   7   8   3   18.24   12.45
  -7   8  -3   78.26   17.06
   8  -8   3   12.35   12.16
  -8  -8  -3    2.81   12.20
   8   8   3   -3.16   12.18
  -8   8  -3   -2.31   13.06
   9  -8   3   84.07   18.59
  -9  -8  -3  101.91   19.68
  -9   8  -3   76.24   20.02
   9   8   3  102.82   21.61
 -10  -8  -3   42.70   16.58
  10   8   3   81.23   21.10
 -10   8  -3   55.05   19.03
  10  -9  -3   19.83   16.07
 -10   9   3   -9.73   13.99
  10   9  -3   17.84   16.37
   9  -9  -3   20.17   13.31
   9   9  -3   15.54   14.14
  -9   9   3   30.29   16.02
  -8  -9   3   12.36   12.36
   8  -9  -3   19.85   13.46
  -8   9   3   22.65   14.70
   8   9  -3    6.44   12.52
  -7  -9   3  -17.76    8.58
   7  -9  -3   10.16   11.65
   7   9  -3  -15.28    9.90
  -7   9   3   -7.56   11.14
  -6  -9   3   10.82   10.21
   6  -9  -3    2.77   10.25
   6   9  -3   21.55   11.12
  -6   9   3   13.23   10.57
   5  -9  -3  339.76   29.17
  -5  -9   3  224.71   24.08
  -5   9   3  269.21   27.50
   5   9  -3  242.24   25.54
  -4  -9   3   41.92    8.73
   4  -9  -3   42.23   11.02
  -4  -9   3   58.06   11.50
  -4   9   3   47.59   12.10
   4   9  -3   31.09   10.76
  -3  -9   3   52.76    9.89
   3  -9  -3   39.94   11.20
  -3  -9   3   62.37   11.60
   3   9  -3   63.97   12.30
  -3   9   3   65.48   12.62
   2  -9  -3   13.14    8.29
  -2  -9   3   13.07    6.25
  -2  -9   3    0.24    6.96
   2   9  -3    0.48    8.48
  -2   9   3    0.08    7.20
  -2   9   3   -4.71    8.16
  -1  -9   3   23.72    7.85
   1  -9  -3   23.13    9.84
  -1  -9   3   26.21    8.45
  -1   9   3   19.30    9.77
  -1   9   3   31.48    8.06
   1   9  -3   27.62    9.44
   0  -9   3   32.84    7.78
   0  -9   3   29.53    8.39
   0  -9  -3   27.13    9.36
   0  -9  -3   35.22    6.40
   0   9  -3   26.72    9.22
   0   9   3   29.43   10.09
   0   9   3   26.96    8.34
  -1  -9  -3   34.83   10.01
   1  -9   3   35.15    8.86
  -1  -9  -3   35.88    5.77
  -1   9  -3   20.27    9.50
   1   9   3   53.42   10.62
   1   9   3   27.88    9.57
  -2  -9  -3   46.11    5.48
  -2  -9  -3   39.02    9.89
   2  -9   3   49.98   10.45
  -2   9  -3   40.51   11.17
   2   9   3   64.94   12.17
   2   9   3   39.99   11.73
  -3  -9  -3   65.65   13.13
   3  -9   3   86.54   13.21
   3   9   3   96.31   14.51
  -3   9  -3   67.22   12.85
   3   9   3   97.01   14.97
  -4  -9  -3   -1.36    7.71
   4  -9   3    2.77    8.96
  -4  -9  -3   -6.65    8.26
   4   9   3    6.54    9.59
  -4   9  -3    0.86    9.28
   5  -9   3   40.18   11.91
  -5  -9  -3   39.89   12.05
  -5  -9  -3   39.75   11.67
  -5   9  -3   26.85   12.01
   5   9   3   56.63   13.33
  -6  -9  -3    5.63   10.04
   6  -9   3   22.31   11.42
  -6  -9  -3   17.23   11.64
   6   9   3   21.51   12.04
  -6   9  -3    7.11   11.22
  -7  -9  -3   59.71   14.03
  -7  -9  -3   81.35   16.28
   7  -9   3   34.60   13.42
   7   9   3   49.72   15.56
  -7   9  -3   56.00   16.03
   8  -9   3   35.08   14.16
  -8  -9  -3   30.15   15.21
   8   9   3    0.39   12.64
  -8   9  -3    4.05   13.67
  -9  -9  -3    4.09   14.11
   9   9   3    4.74   14.42
  -9   9  -3    9.86   15.49
  10 -10  -3   22.60   15.52
 -10  10   3   18.94   16.13
  10  10  -3   25.30   15.93
   9 -10  -3   37.51   16.16
   9  10  -3   17.09   14.19
  -9  10   3   29.97   16.91
   8 -10  -3   37.30   14.52
   8  10  -3   15.16   13.45
  -8  10   3   26.22   14.86
  -7 -10   3   21.78   12.04
   7 -10  -3   12.41   12.28
  -7  10   3   -2.37   12.21
   7  10  -3    3.34   11.60
   6 -10  -3  152.00   20.52
  -6 -10   3  138.89   18.91
   6  10  -3   84.94   16.89
  -6  10   3   94.21   17.52
  -5 -10   3  229.39   23.90
   5 -10  -3  203.62   24.17
  -5  10   3  222.52   25.32
   5  10  -3  211.53   24.51
   4 -10  -3    4.28    9.90
  -4 -10   3   25.75    9.59
  -4  10   3   -5.41    9.18
   4  10  -3    2.21    9.31
  -3 -10   3   97.22   14.38
  -3 -10   3  106.74   15.63
   3 -10  -3  140.13   17.99
  -3  10   3   92.62   15.62
   3  10  -3  109.04   16.25
   2 -10  -3    1.82    8.52
  -2 -10   3   -4.17    5.91
  -2 -10   3   -5.19    6.64
  -2  10   3   -2.36    8.45
   2  10  -3    0.10    8.82
  -2  10   3   11.92    8.43
   1 -10  -3   -0.32    8.00
  -1 -10   3   -3.34    6.92
  -1 -10   3    6.05    6.37
  -1  10   3   -2.96    6.33
   1  10  -3   19.58    9.56
  -1  10   3   -0.51    8.82
   0 -10  -3   86.27   13.63
   0 -10   3   52.46   10.37
   0 -10   3   58.98    9.89
   0 -10  -3   53.03    7.69
   0  10  -3   48.45   11.32
   0  10   3   33.50    9.58
   0  10   3   36.50   10.66
   1 -10   3   59.67   11.50
  -1 -10  -3   50.78   12.45
  -1 -10  -3   57.84    7.41
   1  10   3   75.81   12.10
  -1  10  -3   44.93   11.72
   1  10   3   71.78   13.50
  -2 -10  -3  212.84   14.58
   2 -10   3  211.07   21.24
  -2 -10  -3  202.45   22.46
   2  10   3  208.54   22.78
  -2  10  -3  221.67   22.88
   3 -10   3  273.59   24.50
  -3 -10  -3  311.46   28.18
   3  10   3  257.63   26.94
  -3  10  -3  254.08   25.60
   4 -10   3   74.37   13.78
  -4 -10  -3   73.37   15.01
  -4  10  -3   53.46   13.43
   4  10   3   39.18   12.05
  -5 -10  -3   28.54   11.90
   5 -10   3   -0.87    9.48
   5  10   3   26.81   12.10
  -5  10  -3   35.22   12.42
  -6 -10  -3  120.58   17.60
  -6 -10  -3  109.35   18.59
   6 -10   3  107.62   17.60
  -6  10  -3  117.01   19.23
   6  10   3   86.33   17.26
  -7 -10  -3   69.90   17.02
   7 -10   3   69.29   15.25
  -7  10  -3   56.54   15.87
   7  10   3   41.68   15.65
  -8 -10  -3   18.45   14.20
   8  10   3    2.13   13.11
  -8  10  -3   25.71   15.94
  -9 -10  -3   51.56   17.57
  -9  10  -3   54.48   18.34
   9  10   3   35.85   16.32
   9 -11  -3   61.10   17.17
   9  11  -3   19.10   15.30
  -9  11   3   13.15   15.11
   8 -11  -3   43.80   15.87
  -8  11   3   56.34   17.40
   8  11  -3   29.98   14.90
   7 -11  -3  172.86   25.75
   7  11  -3  219.75   27.15
  -7  11   3  225.27   27.98
   6 -11  -3  263.70   28.52
  -6 -11   3  245.42   26.26
  -6  11   3  261.74   28.49
   6  11  -3  178.05   24.76
  -5 -11   3   -2.05    9.24
   5 -11  -3    1.68   10.73
   5  11  -3   14.08   10.68
  -5  11   3   10.12   12.41
  -4 -11   3   23.84   10.00
   4 -11  -3   23.07   11.60
   4  11  -3   18.79   11.04
  -4  11   3    5.46   10.86
  -3 -11   3  178.99   19.24
   3 -11  -3  118.41   18.47
   3  11  -3  125.05   18.15
  -3  11   3  139.12   19.80
  -2 -11   3  135.65   16.81
  -2 -11   3  185.12   18.87
   2 -11  -3   98.56   15.86
   2  11  -3  131.84   18.34
  -2  11   3  108.83   17.14
  -1 -11   3    2.94    8.56
   1 -11  -3   21.22    9.20
  -1 -11   3    9.86    7.17
   1  11  -3    3.86    9.41
  -1  11   3   -7.91    8.97
   0 -11  -3  157.40   13.57
   0 -11  -3  108.93   16.94
   0 -11   3  175.14   18.37
   0  11  -3  153.32   19.34
   0  11   3  173.09   20.55
   1 -11   3  432.33   34.28
  -1 -11  -3  457.13   29.97
  -1 -11  -3  467.76   35.34
   1  11   3  441.27   36.40
  -1  11  -3  471.97   35.80
   2 -11   3  134.32   17.87
  -2 -11  -3  124.45   17.97
  -2  11  -3  132.95   18.56
   2  11   3  147.06   19.60
   3 -11   3   31.97   10.72
  -3 -11  -3   18.66   10.36
   3  11   3    4.79   10.66
  -3  11  -3   28.51   11.61
  -4 -11  -3  224.42   25.53
   4 -11   3  250.37   25.31
  -4  11  -3  208.30   24.56
   4  11   3  209.04   25.50
  -5 -11  -3  -13.83    9.34
   5 -11   3   18.59   11.78
   5  11   3    1.47   10.94
  -5  11  -3    2.58   11.50
  -6 -11  -3   -2.78   10.62
   6 -11   3   -5.91   10.76
  -6  11  -3    7.36   11.59
   6  11   3   -6.20   10.72
   7 -11   3   47.38   14.64
  -7 -11  -3   46.97   15.83
  -7  11  -3   40.10   16.12
   7  11   3   67.10   17.62
  -8 -11  -3  150.94   24.20
  -8  11  -3  108.63   21.69
   8  11   3  152.32   25.66
  -9 -11  -3   25.20   17.01
   9  11   3   86.75   21.63
  -9  11  -3   80.83   21.37
   9 -12  -3   32.83   16.08
   9  12  -3    1.06   14.69
  -9  12   3    2.70   15.15
   8 -12  -3   10.40   13.63
   8  12  -3   -8.12   12.21
  -8  12   3    5.73   14.96
   7 -12  -3   -3.30   12.64
   7  12  -3    7.20   12.63
  -7  12   3    5.95   13.12
   6 -12  -3   30.43   14.76
   6  12  -3   24.48   13.44
  -6  12   3    2.99   14.00
   5 -12  -3  -11.23    9.17
  -5 -12   3   22.42   11.37
  -5  12   3   20.07   14.04
   5  12  -3   16.13   11.79
   4 -12  -3   45.84   13.72
  -4 -12   3   33.66   12.36
   4  12  -3   14.62   12.19
  -4  12   3   14.42   12.31
  -3 -12   3   12.68   10.13
   3 -12  -3    3.13   10.77
  -3  12   3    3.51    9.99
   3  12  -3    1.35   10.13
   2 -12  -3    6.86    9.84
  -2 -12   3   11.69    9.89
  -2  12   3   10.42   10.56
   2  12  -3   12.69   10.48
   1 -12  -3   -3.44    8.86
  -1 -12   3    0.38    9.13
   1  12  -3    5.39   10.14
  -1  12   3    8.80   10.58
   0 -12  -3    2.96    4.67
   0 -12  -3   -2.71    9.36
   0 -12   3   -1.67    7.67
   0  12  -3  -21.05    8.84
   0  12   3    0.20   10.88
  -1 -12  -3    2.50    9.63
   1 -12   3  -12.03    8.27
  -1  12  -3    4.65   10.18
   1  12   3   -2.99   10.32
  -2 -12  -3    2.36   10.05
   2 -12   3  -13.66    8.28
   2  12   3    5.88   10.70
  -2  12  -3   10.18   10.20
  -3 -12  -3   -3.77   10.21
   3 -12   3    8.03   10.20
  -3  12  -3    4.50   10.35
   3  12   3   -5.43    9.19
  -4 -12  -3   46.20   13.95
   4 -12   3   49.17   13.08
   4  12   3   32.69   13.54
  -4  12  -3   61.84   15.20
  -5 -12  -3   -2.02   11.70
   5 -12   3    9.29   12.34
  -5  12  -3   42.69   14.38
   5  12   3    8.25   12.15
   6 -12   3   18.86   13.33
  -6 -12  -3    0.60   12.45
  -6  12  -3    1.45   12.41
   6  12   3   19.99   13.58
  -7 -12  -3    1.89   12.75
   7  12   3   25.92   14.46
  -7  12  -3   -5.95   12.33
  -8 -12  -3   37.30   17.11
   8  12   3   35.90   16.70
  -8  12  -3   28.78   16.53
   8 -13  -3   14.19   14.86
   8  13  -3   19.52   15.70
  -8  13   3   33.01   16.57
   7 -13  -3   93.22   20.37
   7  13  -3  135.16   22.66
  -7  13   3  199.27   27.60
   6 -13  -3   95.12   20.43
   6  13  -3  112.56   20.37
  -6  13   3   94.41   20.62
   5 -13  -3   -4.76   12.14
   5  13  -3  -11.52   11.81
  -5  13   3  -15.78   11.97
   4 -13  -3  208.30   25.50
  -4 -13   3  221.95   25.28
  -4  13   3  198.76   25.66
   4  13  -3  212.42   26.29
  -3 -13   3   51.29   13.59
   3 -13  -3   62.11   16.29
  -3  13   3   71.02   16.71
   3  13  -3   82.23   16.39
   2 -13  -3   27.06   12.24
  -2 -13   3    9.61   10.33
   2  13  -3    7.90   12.09
  -2  13   3   37.39   13.02
  -1 -13   3   25.11   11.36
   1 -13  -3   29.46   10.95
  -1  13   3   17.78   11.26
   1  13  -3   42.59   13.42
   0 -13   3  227.97   23.36
   0 -13  -3  197.31   17.09
   0 -13  -3  240.54   26.42
   0  13   3  209.38   26.01
   0  13  -3  191.90   23.67
  -1 -13  -3  127.03   19.39
   1 -13   3  129.78   17.58
  -1  13  -3   90.03   17.24
   1  13   3  140.34   20.82
   2 -13   3    4.40   10.75
  -2 -13  -3    3.46   11.20
  -2  13  -3   -3.55   10.74
   2  13   3   17.81   11.90
  -3 -13  -3   83.51   17.74
   3 -13   3   70.49   15.26
   3  13   3   84.79   17.66
  -3  13  -3   51.29   15.09
   4 -13   3  113.07   18.23
  -4 -13  -3  137.81   20.73
   4  13   3   80.06   18.03
  -4  13  -3   37.24   14.99
  -5 -13  -3   22.73   13.65
  -5  13  -3   44.67   15.48
   5  13   3   33.79   15.93
  -6 -13  -3   60.20   17.62
  -6  13  -3   58.22   17.99
   6  13   3   24.18   14.94
  -7 -13  -3   41.25   16.44
  -7  13  -3   28.14   16.30
   7  13   3   37.92   16.90
   7 -14  -3   42.54   17.56
   7  14  -3   37.07   16.95
  -7  14   3   29.84   18.33
   6 -14  -3   12.40   14.30
   6  14  -3   10.65   14.81
  -6  14   3  -21.20   13.41
   5 -14  -3  183.58   25.83
   5  14  -3  169.78   25.00
  -5  14   3  180.89   26.12
   4 -14  -3  466.23   43.35
  -4  14   3  452.26   40.90
   4  14  -3  453.03   40.18
   3 -14  -3   13.67   12.37
  -3  14   3   25.38   13.78
   3  14  -3   40.25   13.94
   2 -14  -3   73.76   16.96
  -2 -14   3   95.73   16.89
   2  14  -3   89.09   17.96
  -2  14   3   89.92   18.08
   1 -14  -3  161.70   16.60
   1 -14  -3  150.53   21.75
  -1 -14   3  219.31   24.30
  -1  14   3  144.87   22.50
   1  14  -3  166.81   23.23
   0 -14   3   31.75   12.84
   0 -14  -3   35.12   14.43
   0  14  -3   24.84   13.17
   0  14   3   27.99   13.92
  -1 -14  -3  144.62   21.12
   1 -14   3   81.34   15.59
   1  14   3   77.55   16.79
  -1  14  -3   79.94   16.98
  -2 -14  -3  112.78   19.70
   2 -14   3  132.56   19.72
   2  14   3  100.21   19.62
  -2  14  -3  112.21   19.29
  -3 -14  -3  151.75   21.82
  -3  14  -3   99.54   19.44
   3  14   3  114.63   20.53
  -4 -14  -3   83.66   19.69
  -4  14  -3  129.30   21.50
   4  14   3  150.46   23.58
  -5 -14  -3   13.07   14.61
  -5  14  -3   26.52   15.02
   5  14   3   -7.55   14.60
  -6 -14  -3  242.06   30.71
   6  14   3  294.39   34.07
  -6  14  -3  292.93   33.25
  -7 -14  -3    4.03   14.57
  -7  14  -3   31.11   16.77
   7  14   3   23.25   15.82
   7 -15  -3    4.77   17.06
   7  15  -3    8.93   14.77
  -7  15   3    3.74   16.61
   6 -15  -3  -16.29   13.60
  -6  15   3   44.83   18.60
   6  15  -3   -2.11   14.59
   5 -15  -3    7.48   14.35
  -5  15   3   -5.78   13.48
   5  15  -3    5.14   13.76
   4 -15  -3   -4.92   13.58
   4  15  -3   29.10   14.35
  -4  15   3    4.94   14.42
   3 -15  -3   -4.70   13.26
   3  15  -3   12.43   13.12
  -3  15   3    6.77   13.21
   2 -15  -3   -5.19   11.60
   2  15  -3   13.55   13.77
  -2  15   3   -2.92   11.82
   1 -15  -3    3.92   12.98
  -1  15   3   18.10   13.41
   1  15  -3   -9.52   12.11
   0 -15  -3   16.23   13.13
   0  15   3   16.70   13.10
   0  15  -3   11.99   13.00
  -1 -15  -3   32.11   14.83
  -1  15  -3   25.32   14.38
   1  15   3   43.99   16.31
  -2 -15  -3   22.75   13.23
  -2  15  -3   58.49   16.46
   2  15   3   45.26   15.82
  -3 -15  -3   11.22   13.78
   3  15   3   -8.84   12.44
  -3  15  -3    8.43   13.09
  -4 -15  -3   37.64   16.27
  -4  15  -3   13.81   14.01
   4  15   3   23.84   15.47
  -5 -15  -3   33.76   15.98
  -5  15  -3   10.43   14.86
   5  15   3   -1.77   13.99
  -6 -15  -3    9.88   14.97
   6  15   3   16.67   15.76
  -6  15  -3   23.15   16.61
   6 -16  -3    1.68   15.75
   6  16  -3   27.01   16.43
   5 -16  -3   44.91   18.20
   5  16  -3  105.52   22.26
  -5  16   3   54.84   19.61
   4 -16  -3   95.82   20.44
   4  16  -3  105.67   21.12
  -4  16   3   99.37   21.94
   3 -16  -3  -21.72   12.40
   3  16  -3    9.56   14.03
  -3  16   3    2.95   13.49
   2 -16  -3  218.13   28.48
   2  16  -3  203.30   29.02
  -2  16   3  256.53   30.72
   1 -16  -3   89.74   19.01
   1  16  -3  106.50   21.78
  -1  16   3   98.06   19.80
   0 -16  -3  -21.66   10.73
   0  16  -3  -32.04   10.21
   0  16   3  -14.28   12.78
  -1 -16  -3   71.75   17.64
   1  16   3   57.63   18.07
  -1  16  -3  103.50   20.25
  -2 -16  -3   33.24   16.11
  -2  16  -3   53.45   16.83
   2  16   3   58.07   16.88
  -3 -16  -3   38.76   15.65
  -3  16  -3   29.85   16.07
   3  16   3   29.15   15.63
  -4 -16  -3   24.72   15.00
   4  16   3   44.06   17.28
  -4  16  -3   19.42   15.61
  -5 -16  -3    8.31   15.48
  -5  16  -3   -1.31   13.97
   5  16   3  -11.60   14.63
   4 -17  -3   91.15   21.35
  -4  17   3   66.66   19.96
   4  17  -3   54.77   18.93
   3 -17  -3   67.29   18.85
   3  17  -3   68.74   19.93
  -3  17   3   43.15   18.04
   2 -17  -3   62.61   18.60
   2  17  -3   29.58   16.73
  -2  17   3   49.30   17.54
   1 -17  -3   13.43   15.26
   1  17  -3   -0.42   13.53
  -1  17   3   33.00   15.86
   0 -17  -3   57.34   17.52
   0  17   3   35.20   16.02
   0  17  -3   53.75   16.59
  -1 -17  -3   22.00   14.58
   1  17   3   16.52   16.11
  -1  17  -3   43.87   17.05
  -2 -17  -3    8.22   14.45
   2  17   3   21.88   15.91
  -2  17  -3   40.12   16.22
  -3 -17  -3   11.26   15.02
  -3  17  -3   35.85   17.66
   3  17   3    7.70   15.41
  -4 -17  -3   70.85   20.57
  -4  17  -3   74.53   20.50
   4  17   3  134.23   24.11
   2 -18  -3   11.15   15.32
   2  18  -3   -7.99   15.29
  -2  18   3    2.50   13.55
   1 -18  -3    4.96   14.68
  -1  18   3    6.58   14.20
   1  18  -3    6.82   15.13
   0 -18  -3   -4.53   13.25
   0  18   3   22.54   16.77
   0  18  -3   16.41   16.18
  -1 -18  -3   -8.35   13.70
  -1  18  -3   21.66   16.88
   1  18   3   -2.15   13.77
  -2 -18  -3   -4.96   14.36
   2  18   3    9.72   15.24
  -2  18  -3    0.42   14.69
  11   0  -4   17.68   13.85
  10   0  -4   17.97   13.24
 -10   0   4   -0.60   11.15
   9   0  -4   62.45   14.68
  -9   0   4   99.45   17.05
  -8   0   4   44.00   12.68
   8   0  -4   30.91   11.11
   7   0  -4  287.68   27.02
  -7   0   4  261.82   25.16
   6   0  -4 1375.61   87.46
  -6   0   4 1340.97   86.92
   5   0  -4  126.39   14.79
  -5   0   4  145.49   15.19
   4   0  -4  243.00   20.35
   4   0  -4  255.27   20.85
  -4   0   4  271.01   20.18
  -3   0   4  219.41   16.81
   3   0  -4  237.14   17.32
   3   0  -4  198.87   17.49
  -2   0   4  234.57   15.68
   2   0  -4  218.41   18.01
   2   0  -4  215.58   15.96
   2   0  -4  218.42   15.90
   1   0  -4   18.54    3.38
  -1   0   4   14.22    2.62
   1   0  -4   19.43    3.50
   1   0  -4   23.96    6.81
   1   0  -4   18.78    6.08
   0   0  -4  141.98    9.73
   0   0  -4  129.72    9.58
   0   0  -4  145.83   13.33
   0   0  -4  142.47   13.12
   0   0   4  131.60    9.15
   1   0   4   79.07    7.55
  -1   0  -4   76.82    7.87
  -1   0  -4   81.52    7.63
   1   0   4   70.09    7.35
   2   0   4  138.33   12.47
   2   0   4  150.78   12.99
  -2   0  -4  125.61   12.35
  -3   0  -4    9.27    6.58
   3   0   4    6.79    5.17
   3   0   4   17.01    6.86
   4   0   4  361.88   27.13
  -4   0  -4  360.16   27.56
   5   0   4  984.82   66.91
  -5   0  -4 1064.39   67.57
   6   0   4  280.17   24.72
  -6   0  -4  262.37   25.76
   7   0   4    0.01    9.34
  -7   0  -4   10.35   10.38
   8   0   4   48.88   13.12
  -8   0  -4   26.26   11.94
   9   0   4   65.37   15.75
  -9   0  -4   69.87   17.20
  10   0   4   20.65   14.40
 -10   0  -4   12.79   14.09
 -11   0  -4  103.66   22.16
  11  -1  -4   38.38   17.00
  11   1  -4   16.35   14.96
 -10  -1   4  122.38   18.98
  10  -1  -4  119.37   20.78
 -10   1   4  121.74   20.96
  10   1  -4  128.89   21.52
   9  -1  -4    1.24   11.32
  -9  -1   4   15.54   11.67
  -9   1   4   -9.95    9.34
   9   1  -4   14.58   12.32
   8  -1  -4   45.46   12.99
  -8  -1   4   67.41   13.90
   8   1  -4   64.82   14.19
  -8   1   4   63.76   13.55
  -7  -1   4    5.47    5.57
   7  -1  -4    5.18    8.75
  -7  -1   4   -2.79    8.12
   7   1  -4    9.61    9.06
  -7   1   4   -7.17    8.44
   6  -1  -4   68.44   12.19
  -6  -1   4   54.31    9.99
  -6  -1   4   96.47   12.56
   6   1  -4   47.44   11.11
  -6   1   4   75.68   11.76
  -5  -1   4  199.47   18.71
   5  -1  -4  230.15   20.56
   5   1  -4  236.04   20.70
   5   1  -4  223.45   18.70
  -5   1   4  209.21   18.83
  -4  -1   4    4.87    5.93
   4  -1  -4   10.25    6.54
  -4   1   4    8.95    5.99
   4   1  -4    3.82    6.46
   4   1  -4    7.85    6.43
   3  -1  -4   -2.50    5.74
  -3  -1   4    1.63    4.95
   3  -1  -4   -9.03    4.99
   3   1  -4    5.96    5.45
  -3   1   4   -5.99    4.86
   3   1  -4   -0.46    5.80
  -2  -1   4   94.68    8.25
   2  -1  -4   81.32   10.75
   2  -1  -4  104.56    9.39
   2  -1  -4   92.73    9.40
  -2   1   4   96.30    8.96
   2   1  -4   77.76    8.43
   2   1  -4  106.38   11.09
   2   1  -4  109.77    8.90
   1  -1  -4   36.11    4.91
   1  -1  -4   27.48    7.12
   1  -1  -4   30.85    4.86
   1  -1  -4   22.27    6.92
   1   1  -4   27.89    6.63
   1   1  -4   28.87    3.53
   1   1  -4   26.92    6.11
   1   1  -4   30.02    3.65
  -1   1   4   24.68    4.39
   0  -1  -4  222.41   15.59
   0  -1  -4  238.68   15.90
   0  -1  -4  210.63   18.45
   0  -1  -4  234.27   18.06
   0   1   4  210.89   15.41
   0   1   4  238.61   16.37
   0   1  -4  237.21   18.21
   0   1  -4  237.98   14.53
   0   1  -4  223.98   14.58
  -1  -1  -4   -3.83    5.61
   1  -1   4   -0.40    3.10
   1  -1   4    0.02    3.64
  -1  -1  -4    5.02    4.78
  -1  -1  -4   -5.51    4.53
   1   1   4    2.59    4.32
   1   1   4    1.94    3.69
  -1   1  -4    0.82    4.01
  -1   1  -4    4.31    4.40
  -2  -1  -4   94.84   10.96
   2  -1   4  129.92   11.27
   2   1   4  117.82   11.27
  -2   1  -4  132.36   11.61
   2   1   4   98.83   10.66
   3  -1   4   37.70    7.51
  -3  -1  -4   36.69    7.80
  -3   1  -4   27.71    7.61
   3   1   4   30.18    7.71
   3   1   4   30.01    7.23
   4  -1   4   47.98    9.17
  -4  -1  -4   59.81   10.23
   4   1   4   50.33    8.59
   4   1   4   62.17   10.44
  -4   1  -4   48.15   10.12
   5  -1   4   19.97    8.46
  -5  -1  -4   11.71    8.35
  -5   1  -4   28.85    9.81
   5   1   4   12.25    8.08
  -6  -1  -4    8.11    8.88
   6  -1   4    6.32    8.23
   6   1   4    3.44    8.14
  -6   1  -4    7.84    9.72
  -7  -1  -4   19.78   10.70
   7  -1   4   22.34   10.75
  -7   1  -4    4.84   10.05
   7   1   4    3.68    9.74
   8  -1   4   -1.98    9.60
  -8  -1  -4    5.63   10.85
  -8   1  -4   10.05   11.87
   8   1   4   15.76   11.11
  -9  -1  -4    3.49   11.57
   9  -1   4   -6.57   10.80
  -9   1  -4   -7.69   11.99
   9   1   4   15.37   12.88
  10  -1   4  135.70   23.17
 -10  -1  -4  147.73   24.53
  10   1   4  157.44   23.46
 -10   1  -4  193.09   25.25
 -11  -1  -4   30.56   15.63
 -11   1  -4   30.03   17.84
  11  -2  -4   19.85   14.61
  11   2  -4    9.37   14.65
 -10  -2   4   30.89   13.45
  10  -2  -4   18.91   14.56
  10   2  -4   53.45   16.80
 -10   2   4   45.48   14.41
  -9  -2   4  192.36   23.61
   9  -2  -4  189.69   23.70
   9   2  -4  234.63   25.93
  -9   2   4  199.94   24.08
   8  -2  -4   84.53   15.83
  -8  -2   4   86.48   15.28
  -8   2   4  116.96   16.73
   8   2  -4   85.03   16.48
  -7  -2   4   33.36    8.91
   7  -2  -4   60.67   12.60
  -7  -2   4   63.83   12.05
   7   2  -4   42.18   11.17
  -7   2   4   56.55   11.65
  -6  -2   4  167.28   16.94
   6  -2  -4  132.85   17.34
  -6  -2   4  163.84   17.20
  -6   2   4  128.82   16.16
   6   2  -4  144.26   15.13
   6   2  -4  141.48   17.13
  -5  -2   4   72.37   10.41
  -5  -2   4   93.01   11.44
   5  -2  -4   92.95   12.49
   5   2  -4   97.17   10.95
  -5   2   4   39.51    9.92
   5   2  -4   71.84   11.50
  -4  -2   4  758.26   51.43
  -4  -2   4  774.70   48.26
   4  -2  -4  762.60   48.93
   4   2  -4  731.33   47.87
   4   2  -4  683.15   48.59
   3  -2  -4  510.54   34.66
  -3  -2   4  543.07   36.25
  -3  -2   4  479.37   33.78
   3  -2  -4  512.68   35.16
  -3  -2   4  518.43   33.81
  -3   2   4  496.54   34.39
   3   2  -4  536.55   34.40
   3   2  -4  551.86   34.54
   2  -2  -4   42.21    7.78
  -2  -2   4   41.59    5.52
   2  -2  -4   22.16    6.41
  -2  -2   4   30.32    5.35
  -2   2   4   42.82    6.76
   2   2  -4   41.14    7.71
   2   2  -4   45.13    5.40
   2   2  -4   50.91    6.26
   2   2  -4   41.41    6.29
  -1  -2   4   66.53    6.00
   1  -2  -4   58.34    7.53
   1  -2  -4   59.31    8.40
   1  -2  -4   58.10    6.96
  -1  -2   4   57.96    5.26
   1   2  -4   63.78    8.72
   1   2  -4   67.42    5.90
   1   2  -4   67.68    6.21
  -1   2   4   74.47    7.21
   0  -2  -4  117.51   10.59
   0  -2   4  116.52    8.26
   0  -2  -4  131.74   11.51
   0  -2   4  106.07    8.68
   0  -2  -4  113.48    9.94
   0  -2  -4  137.16   13.23
   0   2  -4  115.25    9.02
   0   2   4  121.79   10.13
   0   2  -4  105.78    8.92
   0   2  -4  104.56   10.83
   0   2   4  109.41   10.71
  -1  -2  -4   17.18    5.61
  -1  -2  -4    8.59    5.73
   1  -2   4   27.08    4.59
  -1  -2  -4    7.37    6.51
  -1   2  -4   26.17    5.07
   1   2   4   13.24    5.41
   1   2   4   21.16    5.28
  -1   2  -4   15.49    5.06
  -2  -2  -4    0.09    5.88
   2  -2   4    8.36    4.93
  -2   2  -4    2.56    5.63
   2   2   4    0.02    5.55
   2   2   4    2.95    4.65
  -3  -2  -4   23.63    7.45
   3  -2   4   29.01    7.06
  -3  -2  -4   42.76    8.45
  -3   2  -4   19.82    7.37
   3   2   4   23.52    7.74
   3   2   4    5.54    6.36
  -4  -2  -4   14.09    7.80
   4  -2   4   18.50    7.12
   4   2   4   26.60    8.36
   4   2   4   31.53    7.55
  -4   2  -4   24.67    8.57
  -5  -2  -4  131.47   15.94
   5  -2   4  109.49   14.85
   5   2   4  141.80   15.80
  -5   2  -4  129.03   15.58
   5   2   4  128.90   15.61
  -6  -2  -4   21.14    9.83
   6  -2   4   16.76    8.99
  -6   2  -4    3.88    9.76
   6   2   4    5.10    9.31
   7  -2   4   30.61   11.40
  -7  -2  -4   18.70   10.13
  -7   2  -4   22.40   12.19
   7   2   4   19.64   11.01
  -8  -2  -4   23.16   12.36
   8  -2   4   39.71   13.10
  -8   2  -4   57.28   15.58
   8   2   4   73.87   16.35
   9  -2   4   10.01   12.88
  -9  -2  -4    2.37   11.94
  -9   2  -4   40.47   14.96
   9   2   4   -1.36   12.84
  10  -2   4    0.43   13.39
 -10  -2  -4    3.40   12.74
 -10   2  -4    5.30   13.55
  10   2   4   -9.04   12.89
 -11  -2  -4    5.93   13.79
 -11  -2  -4    6.48   13.28
  11   2   4   10.53   15.32
 -11   2  -4    1.26   14.45
  11  -3  -4  104.95   21.21
  11   3  -4   64.47   19.11
 -11   3   4   96.21   22.08
  10  -3  -4   -9.03   10.76
 -10   3   4  -11.84   11.83
  10   3  -4   -5.72   12.48
  10   3  -4   -0.61    9.71
  -9  -3   4   70.79   14.73
   9  -3  -4   65.82   15.49
   9   3  -4   58.67   12.19
  -9   3   4   28.92   12.20
   9   3  -4   52.00   14.60
  -8  -3   4  214.63   22.89
   8  -3  -4  161.71   22.50
   8   3  -4  178.02   18.99
  -8   3   4  203.74   22.92
   8   3  -4  194.01   23.15
   7  -3  -4  381.78   31.79
  -7  -3   4  375.46   30.51
  -7  -3   4  369.59   31.39
   7   3  -4  379.70   31.60
   7   3  -4  364.72   28.34
  -7   3   4  423.90   31.58
   6  -3  -4    7.16    8.41
  -6  -3   4  -11.18    4.60
  -6  -3   4    0.37    7.30
   6   3  -4  -16.24    7.20
  -6   3   4   11.11    7.96
   6   3  -4   -1.61    5.89
  -5  -3   4  142.64   16.16
  -5  -3   4  141.89   15.95
  -5  -3   4  197.14   17.43
   5  -3  -4  209.38   18.86
   5   3  -4  162.49   15.77
   5   3  -4  237.56   19.94
  -5   3   4  221.28   19.20
   4  -3  -4  924.48   58.80
  -4  -3   4  941.32   57.94
  -4  -3   4  932.36   62.11
  -4  -3   4  871.67   57.68
   4   3  -4  878.61   58.23
  -4   3   4  916.04   58.34
   4   3  -4  857.81   56.86
   3  -3  -4    3.27    5.77
  -3  -3   4    1.68    4.31
  -3  -3   4    1.91    4.92
   3   3  -4    0.10    5.27
   3   3  -4    3.42    5.75
  -3   3   4    4.94    5.89
   2  -3  -4  522.65   34.28
   2  -3  -4  537.74   34.70
  -2  -3   4  510.65   32.99
  -2  -3   4  506.97   35.31
   2   3  -4  515.19   33.30
   2   3  -4  531.11   33.91
  -2   3   4  459.84   33.78
   2   3  -4  541.75   33.54
   2   3  -4  515.36   33.89
   2   3  -4  495.01   33.18
  -1  -3   4  184.53   14.85
   1  -3  -4  201.82   15.55
  -1  -3   4  204.53   13.90
   1  -3  -4  201.43   16.60
   1   3  -4  209.71   14.50
  -1   3   4  193.54   15.59
   1   3  -4  199.36   14.68
   1   3  -4  204.33   16.54
   0  -3   4  255.74   19.20
   0  -3   4  275.89   17.94
   0  -3  -4  259.90   19.56
   0  -3  -4  273.60   19.68
   0  -3  -4  257.39   22.08
   0   3   4  276.36   19.71
   0   3   4  284.02   20.62
   0   3  -4  278.41   18.27
   0   3  -4  256.38   18.44
  -1  -3  -4   23.39    6.08
  -1  -3  -4   18.87    7.36
  -1  -3  -4   14.29    6.25
   1  -3   4   17.44    5.22
  -1   3  -4   19.35    5.50
   1   3   4   18.92    5.93
  -1   3  -4   20.91    5.83
   1   3   4   10.67    5.89
   2  -3   4  255.17   18.93
  -2  -3  -4  257.10   20.34
  -2  -3  -4  275.83   22.50
   2   3   4  259.53   20.08
  -2   3  -4  238.20   19.77
   2   3   4  277.23   21.27
  -3  -3  -4  777.95   51.47
   3  -3   4  769.71   50.63
   3   3   4  786.36   51.52
  -3   3  -4  798.78   51.26
  -4  -3  -4  307.44   24.37
  -4  -3  -4  340.59   24.62
   4  -3   4  294.66   23.07
  -4   3  -4  301.73   24.20
   4   3   4  241.03   24.54
   4   3   4  319.45   24.81
  -5  -3  -4   36.68    9.36
   5  -3   4   30.15    8.91
  -5  -3  -4   32.99    9.66
  -5   3  -4   47.75   10.78
   5   3   4   61.70   11.31
   5   3   4   40.42    9.73
  -6  -3  -4  185.83   20.62
   6  -3   4  158.36   19.01
  -6  -3  -4  167.01   19.89
  -6   3  -4  192.12   20.49
   6   3   4  171.10   20.31
   6   3   4  179.61   20.08
   7  -3   4  292.80   26.95
  -7  -3  -4  254.74   26.78
  -7  -3  -4  306.79   28.31
  -7   3  -4  244.56   26.70
   7   3   4  212.36   24.99
  -8  -3  -4   -6.07    9.77
   8  -3   4    9.14   10.55
  -8  -3  -4   -9.48    9.99
  -8   3  -4  -22.40   11.22
   8   3   4   -1.37   11.24
  -9  -3  -4   92.92   18.02
  -9  -3  -4   75.21   16.78
   9  -3   4   64.84   15.72
  -9   3  -4  112.66   20.38
   9   3   4   63.14   16.84
 -10  -3  -4   40.62   16.19
  10  -3   4   80.62   19.50
 -10  -3  -4   88.99   19.15
 -10   3  -4   54.06   18.19
  10   3   4   89.81   19.32
 -11  -3  -4   14.31   14.36
 -11  -3  -4    9.08   14.48
 -11   3  -4   21.71   17.29
  11   3   4    4.72   13.76
  11  -4  -4   31.96   15.26
  11   4  -4   81.61   20.16
 -11   4   4   16.51   15.63
  10  -4  -4  151.70   23.58
 -10   4   4  113.27   20.51
  10   4  -4  180.67   24.38
  -9  -4   4   68.64   15.41
   9  -4  -4   42.56   14.88
  -9  -4   4   26.33   12.55
   9   4  -4   43.78   10.70
   9   4  -4   60.51   15.41
  -9   4   4   38.82   13.74
   8  -4  -4  155.01   21.53
  -8  -4   4  195.29   21.62
  -8  -4   4  209.77   22.49
   8   4  -4  145.67   20.83
  -8   4   4  225.69   24.35
   8   4  -4  219.80   19.65
  -7  -4   4   15.08    9.21
   7  -4  -4   17.72   10.27
  -7  -4   4    6.41    8.34
  -7  -4   4    4.15    6.05
   7   4  -4   11.93    7.17
   7   4  -4   19.60   10.33
  -7   4   4    4.75    9.13
  -6  -4   4  125.03   14.61
  -6  -4   4   91.66   13.54
  -6  -4   4   99.76   13.63
   6  -4  -4   99.92   14.81
  -6   4   4  107.72   14.63
   6   4  -4  102.98   14.54
   6   4  -4   91.31   11.67
   5  -4  -4    6.32    7.55
  -5  -4   4   -1.21    6.20
  -5  -4   4   -2.51    4.35
   5   4  -4  -10.23    6.53
   5   4  -4   -2.84    5.38
  -5   4   4    9.08    7.84
  -4  -4   4   11.49    5.50
   4  -4  -4   19.38    7.85
  -4  -4   4   21.65    6.66
  -4   4   4   24.26    7.99
   4   4  -4   17.72    7.25
   4   4  -4   15.25    6.15
  -3  -4   4  162.00   14.32
  -3  -4   4  153.34   13.68
   3  -4  -4  140.30   14.45
  -3   4   4  132.79   14.52
   3   4  -4  144.44   14.21
   3   4  -4  149.57   13.07
   2  -4  -4  227.98   18.69
   2  -4  -4  229.26   18.45
  -2  -4   4  235.30   18.34
  -2  -4   4  239.38   17.10
   2   4  -4  209.68   17.63
  -2   4   4  219.05   18.86
   2   4  -4  259.86   17.97
  -1  -4   4   45.92    6.21
   1  -4  -4   53.29    8.36
   1  -4  -4   48.54    7.92
  -1  -4   4   50.55    6.71
   1   4  -4   46.59    7.34
   1   4  -4   46.11    7.43
  -1   4   4   43.39    7.69
   1   4  -4   49.97    6.74
   0  -4   4  556.53   35.82
   0  -4  -4  510.89   34.50
   0  -4   4  490.05   33.01
   0  -4  -4  505.71   37.54
   0  -4  -4  565.70   33.82
   0   4   4  542.16   36.78
   0   4   4  482.83   34.51
   0   4  -4  497.32   33.26
   0   4  -4  494.20   33.68
  -1  -4  -4  201.43   17.84
  -1  -4  -4  233.72   16.99
   1  -4   4  229.51   16.91
  -1  -4  -4  208.60   19.41
   1   4   4  250.50   19.07
   1   4   4  226.54   18.63
  -1   4  -4  210.06   17.50
   2  -4   4  196.05   16.43
  -2  -4  -4  204.45   17.56
  -2  -4  -4  179.63   18.63
  -2   4  -4  218.62   17.41
   2   4   4  190.87   17.85
   2   4   4  193.06   17.13
  -3  -4  -4  162.15   16.67
  -3  -4  -4  213.89   18.96
   3  -4   4  152.52   14.97
  -3   4  -4  153.93   16.01
   3   4   4  169.34   16.43
   3   4   4  144.46   15.26
  -4  -4  -4   -1.29    7.19
  -4  -4  -4    0.31    7.29
   4  -4   4    1.93    6.66
   4   4   4   -0.55    6.38
   4   4   4    2.68    7.21
  -4   4  -4   -5.15    7.11
  -5  -4  -4    9.95    9.36
   5  -4   4   27.95    8.73
  -5   4  -4   27.31   10.62
   5   4   4   19.69    8.95
   5   4   4   22.23    9.77
  -6  -4  -4    8.18    9.58
   6  -4   4   20.42    9.51
  -6  -4  -4   30.79   10.74
   6   4   4   21.76    9.83
   6   4   4   29.09   11.00
  -6   4  -4   22.46   10.76
  -7  -4  -4   75.92   14.41
  -7  -4  -4   33.65   12.19
   7  -4   4   34.28   12.35
   7   4   4   52.30   13.15
  -7   4  -4   39.27   13.66
   8  -4   4  122.85   17.99
  -8  -4  -4   69.10   15.40
  -8  -4  -4   64.86   15.30
  -8   4  -4   82.22   16.81
   8   4   4   82.14   16.88
   9  -4   4   20.35   13.22
  -9  -4  -4   29.56   13.73
  -9  -4  -4    8.99   13.30
   9   4   4  -13.03   11.00
  -9   4  -4   -4.11   12.81
 -10  -4  -4   -1.10   13.01
 -10  -4  -4    7.22   14.50
 -10   4  -4  -14.96   14.12
  10   4   4   -6.96   12.61
  11  -5  -4    3.73   15.18
 -11   5   4   28.84   16.25
  11   5  -4   14.60   15.98
  10  -5  -4   -2.03   13.48
 -10   5   4   10.20   12.20
  10   5  -4   24.69   14.35
   9  -5  -4   11.30   12.75
  -9  -5   4    3.79   11.21
  -9   5   4    4.51   11.96
   9   5  -4   34.94   14.55
   8  -5  -4  126.17   19.26
  -8  -5   4  189.54   20.99
   8   5  -4  130.37   15.00
  -8   5   4  128.61   18.42
   8   5  -4  143.38   20.48
  -7  -5   4  413.04   33.21
   7  -5  -4  407.75   34.61
   7   5  -4  456.34   34.89
   7   5  -4  425.62   30.15
  -6  -5   4   38.43    9.16
   6  -5  -4   30.50   10.48
  -6  -5   4   22.35    7.97
   6   5  -4   12.95    9.35
   6   5  -4   21.91    6.81
  -6   5   4   25.04   10.23
  -5  -5   4   52.72    9.34
   5  -5  -4   42.37   10.94
  -5  -5   4   69.94   10.86
  -5   5   4   48.40   10.41
   5   5  -4   65.66    8.67
   5   5  -4   47.68   10.36
  -4  -5   4   38.63    8.12
  -4  -5   4   55.69    9.11
   4  -5  -4   35.94    9.32
   4   5  -4   31.83    9.20
  -4   5   4   34.69    9.13
   4   5  -4   54.40    7.75
  -3  -5   4   32.40    7.42
   3  -5  -4    7.92    7.09
  -3  -5   4   26.89    6.01
   3   5  -4   20.18    5.94
   3   5  -4   35.52    7.97
  -3   5   4   26.58    8.34
   2  -5  -4 2236.89  140.63
   2  -5  -4 2345.26  139.38
  -2  -5   4 2231.55  139.57
  -2  -5   4 2428.63  150.50
  -2   5   4 2274.98  140.77
   2   5  -4 2161.33  139.96
   2   5  -4 2305.24  137.90
  -1  -5   4  418.92   28.11
   1  -5  -4  414.12   29.06
  -1  -5   4  432.81   30.27
   1  -5  -4  417.84   29.52
  -1   5   4  410.91   31.29
  -1   5   4  417.07   29.63
   1   5  -4  413.52   28.84
   0  -5  -4    7.22    5.45
   0  -5   4    5.88    4.97
   0  -5  -4    3.97    6.18
   0  -5   4    8.74    4.73
   0   5   4    3.74    5.51
   0   5   4   11.65    6.78
   0   5  -4   15.81    6.51
  -1  -5  -4  469.83   32.34
  -1  -5  -4  460.93   30.41
   1  -5   4  486.16   30.98
  -1  -5  -4  420.12   34.30
  -1   5  -4  455.47   31.51
   1   5   4  430.65   32.20
   1   5   4  495.37   34.29
  -2  -5  -4  100.51   12.64
  -2  -5  -4  114.23   10.50
   2  -5   4  102.74   11.90
  -2  -5  -4  122.28   14.29
   2   5   4  113.63   13.60
   2   5   4  111.44   13.00
  -2   5  -4  113.65   12.93
   3  -5   4  383.52   29.47
  -3  -5  -4  433.43   31.01
  -3  -5  -4  404.14   32.31
   3   5   4  417.16   30.71
  -3   5  -4  393.62   30.33
   3   5   4  460.03   32.73
  -4  -5  -4  117.63   15.07
  -4  -5  -4  109.73   14.68
   4  -5   4  135.91   14.45
  -4   5  -4  141.28   15.70
   4   5   4  108.07   14.98
   4   5   4  110.54   14.69
  -5  -5  -4    2.40    7.98
  -5  -5  -4   -6.81    8.28
   5  -5   4   -7.62    6.92
   5   5   4   11.02    7.46
   5   5   4  -11.10    7.34
  -5   5  -4   -6.95    8.14
  -6  -5  -4  162.52   19.16
   6  -5   4  110.51   16.18
  -6  -5  -4  166.67   18.80
  -6   5  -4  158.60   20.07
   6   5   4  111.57   17.18
  -7  -5  -4    8.72   11.00
   7  -5   4    9.72   10.00
  -7   5  -4   13.20   11.82
   7   5   4   19.42   11.98
   8  -5   4   80.00   16.52
  -8  -5  -4   81.33   17.23
  -8   5  -4   81.27   17.28
   8   5   4   56.16   16.64
   9  -5   4  147.71   22.13
  -9  -5  -4  121.89   20.79
   9   5   4  139.53   22.86
  -9   5  -4  124.75   22.54
 -10  -5  -4   28.83   16.36
 -10   5  -4   12.17   16.21
  10   5   4   18.65   14.33
  11  -6  -4   43.74   17.16
  11   6  -4   21.73   16.19
 -11   6   4   12.32   15.27
  10  -6  -4  365.32   36.56
 -10   6   4  313.96   33.13
  10   6  -4  280.21   32.17
   9  -6  -4  205.90   25.83
  -9   6   4  152.08   23.08
   9   6  -4  140.54   21.55
   8  -6  -4   46.12   14.18
  -8  -6   4   51.20   13.17
   8   6  -4   44.38   13.70
  -8   6   4   49.03   13.77
   7  -6  -4  143.43   19.59
  -7  -6   4  166.67   19.43
   7   6  -4  137.04   19.20
  -7   6   4  177.81   21.07
   7   6  -4  166.03   15.56
  -6  -6   4    3.99    8.09
   6  -6  -4   15.28   10.48
  -6  -6   4   14.87    7.11
   6   6  -4   18.63    9.39
   6   6  -4   17.46    6.55
  -6   6   4   19.95    9.56
  -5  -6   4  121.29   14.86
  -5  -6   4  151.81   16.55
   5  -6  -4  110.93   15.60
  -5   6   4  129.45   16.03
   5   6  -4  139.54   12.78
   5   6  -4  127.38   15.67
  -4  -6   4    1.69    5.45
   4  -6  -4    2.23    7.39
  -4  -6   4   -5.95    6.13
   4   6  -4   -3.06    4.91
  -4   6   4    2.83    7.94
   4   6  -4    0.89    6.60
   3  -6  -4   55.03   10.53
  -3  -6   4   55.65    9.16
  -3  -6   4   51.34    8.37
   3   6  -4   49.03    7.22
  -3   6   4   65.60   10.52
   3   6  -4   40.97    9.11
   2  -6  -4 2298.39  138.93
  -2  -6   4 2211.51  137.68
  -2  -6   4 2298.33  148.22
   2   6  -4 2083.65  137.97
  -2   6   4 2330.67  139.14
   1  -6  -4    2.50    5.74
   1  -6  -4    4.89    6.65
  -1  -6   4    3.85    4.60
  -1  -6   4    0.13    4.93
  -1   6   4    8.02    6.80
  -1   6   4    1.39    5.80
   1   6  -4    8.04    6.03
   0  -6  -4  412.98   31.09
   0  -6  -4  418.20   29.49
   0  -6   4  466.88   30.00
   0  -6   4  458.54   32.39
   0   6   4  441.11   31.56
   0   6  -4  417.50   30.79
   0   6   4  460.99   33.29
  -1  -6  -4 1513.06   91.10
   1  -6   4 1576.57   92.97
  -1  -6  -4 1432.96  100.05
  -1  -6  -4 1529.37   94.19
   1   6   4 1355.62  100.36
   1   6   4 1518.39   94.30
  -1   6  -4 1530.87   93.46
   2  -6   4  220.30   17.84
  -2  -6  -4  209.55   15.59
  -2  -6  -4  192.76   20.01
  -2  -6  -4  229.95   19.48
   2   6   4  200.57   19.91
   2   6   4  219.23   19.35
  -2   6  -4  207.32   18.47
  -3  -6  -4  245.50   22.32
   3  -6   4  213.46   19.31
  -3  -6  -4  232.35   21.57
   3   6   4  238.24   21.87
  -3   6  -4  185.49   19.81
   3   6   4  249.49   22.82
  -4  -6  -4  454.27   34.45
  -4  -6  -4  481.10   35.73
   4  -6   4  440.99   33.09
  -4   6  -4  472.09   34.39
   4   6   4  431.83   34.17
  -5  -6  -4  106.24   15.49
   5  -6   4  101.88   14.46
  -5  -6  -4  120.57   16.34
   5   6   4  139.64   16.88
  -5   6  -4  105.04   15.40
   5   6   4  106.19   15.53
   6  -6   4   -6.50    8.23
  -6  -6  -4    8.59    9.94
  -6  -6  -4    3.89    8.83
   6   6   4    5.04    9.06
  -6   6  -4    0.86   10.11
   7  -6   4   89.85   16.04
  -7  -6  -4   88.60   16.37
  -7  -6  -4  103.64   18.01
  -7   6  -4   82.73   17.17
   7   6   4  115.19   17.97
  -8  -6  -4   54.85   16.13
   8  -6   4   45.06   14.40
  -8  -6  -4   45.84   14.54
  -8   6  -4   35.00   14.66
   8   6   4   25.13   13.58
  -9  -6  -4   90.02   18.66
  -9  -6  -4   91.53   19.21
  -9   6  -4   80.60   18.94
   9   6   4   79.33   18.04
 -10  -6  -4   17.48   14.89
  10   6   4   -0.82   13.71
 -10   6  -4   28.72   16.54
  11  -7  -4   14.98   14.27
  11   7  -4   16.80   15.46
  10  -7  -4   11.30   14.76
  10   7  -4   -1.33   13.61
 -10   7   4  -14.13   12.70
   9  -7  -4   35.53   15.46
  -9   7   4   29.81   14.74
   9   7  -4   71.49   17.28
  -8  -7   4   76.09   15.80
   8  -7  -4   58.24   15.18
  -8   7   4   57.11   14.56
   8   7  -4   65.89   16.16
   7  -7  -4   18.83   10.60
  -7  -7   4   25.12   10.39
  -7   7   4   21.06   11.77
   7   7  -4   35.93   11.88
   6  -7  -4  163.45   20.05
  -6  -7   4  130.55   17.78
  -6  -7   4  182.87   19.99
  -6   7   4  153.56   19.10
   6   7  -4  185.76   14.79
   6   7  -4  146.50   19.16
  -5  -7   4   14.94    7.27
  -5  -7   4    3.21    7.89
   5  -7  -4    6.94    8.94
   5   7  -4   21.27    6.20
   5   7  -4   14.42    9.02
  -5   7   4   20.84    9.47
   4  -7  -4  155.11   17.24
  -4  -7   4  157.45   16.87
  -4  -7   4  146.27   16.88
   4   7  -4  158.00   17.05
   4   7  -4  158.66   13.36
  -4   7   4  159.46   17.97
  -3  -7   4   37.68    8.57
  -3  -7   4   57.16    9.18
   3  -7  -4   45.16   10.05
   3   7  -4   63.52   10.54
  -3   7   4   27.55    9.30
  -2  -7   4  566.20   38.80
  -2  -7   4  577.87   41.62
   2  -7  -4  567.29   40.21
   2   7  -4  542.99   39.60
  -2   7   4  609.20   42.62
  -2   7   4  582.50   40.38
  -1  -7   4   34.60    7.44
   1  -7  -4   24.72    6.87
   1  -7  -4   20.23    8.02
  -1  -7   4   19.29    6.40
  -1   7   4   21.96    8.45
  -1   7   4   34.85    9.11
   1   7  -4   24.16    7.86
   0  -7  -4   22.68    7.70
   0  -7   4    8.28    5.76
   0  -7  -4    9.19    5.31
   0  -7   4   14.32    5.93
   0   7  -4    3.42    7.08
   0   7   4   31.64    8.64
   0   7   4   18.45    7.05
  -1  -7  -4   54.91   10.14
   1  -7   4   55.28    8.88
  -1  -7  -4   52.29    7.13
  -1   7  -4   49.76    9.29
   1   7   4   45.37    9.21
   1   7   4   53.00   10.49
  -2  -7  -4   30.50    9.77
   2  -7   4   26.08    7.26
  -2  -7  -4   18.99    8.50
  -2  -7  -4   26.59    5.19
   2   7   4   13.93    8.02
  -2   7  -4   20.67    8.17
   2   7   4   24.43    8.30
  -3  -7  -4   13.89    8.67
  -3  -7  -4   19.33    8.54
   3  -7   4   11.29    7.49
  -3   7  -4    4.06    7.95
   3   7   4    0.27    7.72
   3   7   4    2.78    6.60
  -4  -7  -4    8.58    8.23
   4  -7   4   -1.64    7.90
  -4  -7  -4   -5.43    7.53
   4   7   4   -5.98    7.51
  -4   7  -4    0.24    8.38
   4   7   4   13.33    6.97
   5  -7   4    3.15    7.72
  -5  -7  -4    8.37    9.83
  -5  -7  -4   -9.76    7.52
  -5   7  -4   -1.44    8.73
   5   7   4    0.24    8.51
   6  -7   4  100.93   15.95
  -6  -7  -4  112.39   17.34
  -6  -7  -4  116.63   17.54
   6   7   4  115.68   17.99
  -6   7  -4  103.92   16.97
  -7  -7  -4   87.60   16.34
   7  -7   4   61.00   15.26
  -7  -7  -4   56.59   15.15
   7   7   4   89.56   17.30
  -7   7  -4   87.63   17.86
  -8  -7  -4    8.87   12.64
   8  -7   4   13.12   12.49
  -8  -7  -4    0.24   12.62
   8   7   4   19.39   13.49
  -8   7  -4  -10.26   12.41
  -9  -7  -4    9.20   13.54
  -9   7  -4   26.93   15.44
   9   7   4   26.09   14.67
 -10  -7  -4   23.27   15.67
  10   7   4    3.37   15.13
 -10   7  -4   33.68   18.09
  10  -8  -4    9.28   14.80
  10   8  -4   -1.52   13.71
 -10   8   4  -14.74   12.60
   9  -8  -4   -6.08   11.96
   9   8  -4    9.65   12.91
  -9   8   4  -18.09   11.87
   8  -8  -4   57.82   15.45
  -8   8   4   62.02   16.51
   8   8  -4   75.11   16.36
   7  -8  -4  -11.38    9.81
  -7  -8   4    8.92   10.19
   7   8  -4   -6.24    9.39
  -7   8   4    2.33   11.20
   6  -8  -4   -5.99    8.44
  -6  -8   4   15.22    9.72
  -6   8   4   11.47   10.25
   6   8  -4    9.08    9.14
  -5  -8   4   12.51    8.86
   5  -8  -4   17.35    9.72
  -5  -8   4   14.47    7.42
   5   8  -4    9.12    5.37
   5   8  -4   29.72   10.00
  -5   8   4   23.10   10.99
  -4  -8   4   16.22    7.96
  -4  -8   4    7.21    6.27
   4  -8  -4   24.81    9.90
   4   8  -4    9.01    8.39
  -4   8   4   22.99   10.04
  -3  -8   4    5.94    6.74
   3  -8  -4    0.60    7.80
  -3  -8   4   13.53    7.30
  -3   8   4    5.61    8.40
   3   8  -4    2.92    7.24
  -2  -8   4   -4.01    5.11
  -2  -8   4   -8.05    5.67
   2  -8  -4    4.45    7.31
  -2   8   4   -3.47    7.45
  -2   8   4    1.23    6.56
   2   8  -4    3.56    7.44
  -1  -8   4  638.12   44.11
   1  -8  -4  659.95   40.38
   1  -8  -4  575.83   42.23
  -1  -8   4  590.75   41.04
   1   8  -4  580.24   41.66
  -1   8   4  534.09   44.54
  -1   8   4  660.20   43.13
   0  -8  -4  103.35   10.69
   0  -8   4  102.19   11.68
   0  -8   4   69.55   10.91
   0   8   4   89.20   13.38
   0   8  -4   94.99   12.89
   0   8   4  112.57   13.23
   1  -8   4  145.44   15.17
  -1  -8  -4  151.73   17.59
  -1  -8  -4  155.03   12.72
  -1   8  -4  141.41   16.31
   1   8   4  160.37   17.73
   1   8   4  151.86   17.26
   2  -8   4   72.53   11.31
  -2  -8  -4   79.46   12.86
  -2  -8  -4   81.50    8.10
   2   8   4   73.72   12.33
  -2   8  -4   74.06   12.30
   2   8   4   60.88   12.46
   3  -8   4   26.86    8.48
  -3  -8  -4   17.87    8.78
  -3  -8  -4   26.64    9.31
   3   8   4   22.21    9.37
   3   8   4   18.63    8.42
  -3   8  -4   12.86    9.16
   4  -8   4   85.32   13.13
  -4  -8  -4   46.42   12.19
  -4  -8  -4   63.65   12.05
  -4   8  -4   32.95   11.55
   4   8   4   63.30   12.14
   4   8   4   63.55   13.26
   5  -8   4   91.88   14.68
  -5  -8  -4  104.02   15.03
  -5  -8  -4   86.53   15.12
   5   8   4  103.66   16.45
  -5   8  -4   97.94   16.06
  -6  -8  -4    7.24    9.87
  -6  -8  -4  -10.28    9.78
   6  -8   4   12.27    9.76
   6   8   4    0.36    9.73
  -6   8  -4   11.93   10.83
  -7  -8  -4   37.03   13.74
   7  -8   4   29.32   12.88
  -7  -8  -4   28.05   13.14
   7   8   4   17.58   13.40
  -7   8  -4   31.51   14.63
  -8  -8  -4   47.18   15.41
  -8  -8  -4   30.21   13.76
   8   8   4   21.88   13.41
  -8   8  -4   50.29   17.18
  -9  -8  -4   25.60   13.55
   9   8   4    8.33   13.84
  -9   8  -4  -18.27   13.82
  10  -9  -4   -6.23   13.99
  10   9  -4   24.06   16.06
 -10   9   4    7.70   15.83
   9  -9  -4   -1.49   12.02
   9   9  -4   -5.32   13.33
  -9   9   4    8.41   13.79
   8  -9  -4   73.37   17.28
   8   9  -4  104.32   18.70
  -8   9   4   76.26   17.67
   7  -9  -4   32.22   13.59
  -7  -9   4   30.89   12.98
   7   9  -4   36.40   12.75
  -7   9   4   19.18   13.35
   6  -9  -4    1.41   10.12
  -6  -9   4   -1.03    9.59
   6   9  -4    1.34    9.89
  -6   9   4   15.44   12.06
  -5  -9   4  193.46   21.14
   5  -9  -4  154.07   20.37
  -5  -9   4  204.62   21.37
   5   9  -4  174.32   20.72
  -5   9   4  199.31   22.76
   4  -9  -4  481.09   35.47
  -4  -9   4  456.47   35.07
  -4  -9   4  405.82   32.98
   4   9  -4  407.48   33.64
  -4   9   4  433.92   34.96
   3  -9  -4   -4.01    8.19
  -3  -9   4   -7.93    6.65
  -3  -9   4   -1.91    5.69
   3   9  -4    8.12    8.46
  -3   9   4    8.45    8.78
  -2  -9   4   -6.47    5.96
  -2  -9   4   11.10    6.47
   2  -9  -4    9.14    8.80
   2   9  -4    8.95    8.25
  -2   9   4   -0.85    6.93
  -2   9   4   21.02    9.33
   1  -9  -4  226.02   20.72
   1  -9  -4  173.68   15.73
  -1  -9   4  168.32   16.96
  -1  -9   4  138.17   16.31
  -1   9   4  155.32   17.09
   1   9  -4  152.99   17.41
  -1   9   4  166.53   18.61
   0  -9  -4  269.59   20.43
   0  -9   4  295.98   22.66
   0  -9  -4  261.95   24.02
   0  -9   4  307.65   24.31
   0   9   4  220.62   23.94
   0   9  -4  261.89   23.75
   0   9   4  308.09   25.37
   1  -9   4    8.42    6.69
  -1  -9  -4    1.04    4.04
  -1  -9  -4    2.05    7.60
   1   9   4    2.83    6.99
   1   9   4   -5.41    6.81
  -1   9  -4    5.61    7.91
  -2  -9  -4  128.07   10.80
   2  -9   4  144.40   15.85
  -2  -9  -4  108.48   16.19
   2   9   4  132.80   16.58
   2   9   4  107.04   15.77
  -2   9  -4  135.25   16.39
   3  -9   4  278.62   23.71
  -3  -9  -4  231.27   24.52
  -3   9  -4  252.49   24.71
   3   9   4  228.10   24.89
   3   9   4  301.18   25.74
  -4  -9  -4    2.90    8.39
   4  -9   4   19.18    9.21
  -4  -9  -4  -10.21    7.92
   4   9   4   13.45    9.99
  -4   9  -4    6.28    9.32
  -5  -9  -4   27.73   10.58
  -5  -9  -4   32.27   12.70
   5  -9   4   28.61   11.18
  -5   9  -4   28.10   11.67
   5   9   4   23.12   11.22
   6  -9   4   99.44   16.05
  -6  -9  -4   96.74   17.20
  -6  -9  -4  109.52   17.59
  -6   9  -4  125.87   19.24
   6   9   4   57.74   15.30
  -7  -9  -4  152.40   19.82
   7  -9   4   71.88   16.84
  -7  -9  -4  103.65   18.95
  -7   9  -4  125.18   20.51
   7   9   4  117.43   19.80
  -8  -9  -4   24.59   14.84
  -8   9  -4   -7.37   13.27
   8   9   4   26.76   13.85
  -9  -9  -4   40.59   16.36
  -9   9  -4   30.54   16.90
   9   9   4   34.38   16.97
  10 -10  -4   15.91   15.66
  10  10  -4   30.21   16.54
 -10  10   4   39.04   17.84
   9 -10  -4   19.03   15.15
   9  10  -4   34.73   15.69
  -9  10   4   -6.93   13.44
   8 -10  -4   -8.03   11.76
  -8  10   4  -13.26   12.75
   8  10  -4  -12.06   11.17
   7 -10  -4    8.34   11.36
  -7  10   4   -4.80   11.67
   7  10  -4   11.02   11.23
  -6 -10   4  134.08   18.22
   6 -10  -4  118.29   19.58
   6  10  -4   74.38   16.59
  -6  10   4  127.19   19.93
   5 -10  -4   -0.61    9.04
  -5 -10   4   -5.81    8.92
  -5  10   4    9.62   11.49
   5  10  -4    1.61    9.56
  -4 -10   4  130.31   16.52
  -4 -10   4  125.50   16.10
   4 -10  -4  114.99   17.72
   4  10  -4  127.22   17.11
  -4  10   4  142.08   18.99
  -3 -10   4   21.31    7.96
   3 -10  -4   12.11   10.03
  -3 -10   4   13.57    8.70
  -3  10   4   33.38   11.67
   3  10  -4   19.28   10.48
  -2 -10   4   11.17    7.09
   2 -10  -4   13.12    9.34
  -2 -10   4   -7.95    6.55
  -2  10   4   -2.85    8.20
  -2  10   4   -8.29    6.96
   2  10  -4   -5.43    8.03
  -1 -10   4   34.10    9.36
  -1 -10   4   29.76    9.61
   1 -10  -4   51.34   12.00
   1 -10  -4   51.28    8.78
  -1  10   4   35.32    9.39
   1  10  -4   37.29   10.40
  -1  10   4   32.22   10.51
   0 -10  -4   -0.11    8.09
   0 -10   4   -1.77    6.63
   0 -10  -4    0.70    4.81
   0 -10   4    2.82    5.93
   0  10  -4   -2.66    8.42
   0  10   4    4.53    7.33
   0  10   4   -2.73    8.37
  -1 -10  -4  144.05   12.78
   1 -10   4  133.58   16.39
  -1 -10  -4  122.92   16.84
  -1  10  -4  124.49   16.91
   1  10   4  132.82   17.83
   1  10   4  178.85   19.42
  -2 -10  -4  209.62   22.65
   2 -10   4  201.41   20.95
  -2 -10  -4  206.68   14.86
   2  10   4  181.92   22.04
  -2  10  -4  192.81   21.05
   3 -10   4   -2.02    8.22
  -3 -10  -4   -1.47    8.41
  -3  10  -4    7.28    9.41
   3  10   4    0.97    9.75
  -4 -10  -4  110.24   17.94
   4 -10   4  109.41   16.29
   4  10   4   91.09   16.20
  -4  10  -4   91.01   16.16
  -5 -10  -4    2.20    9.43
  -5 -10  -4    4.79   10.09
   5 -10   4  -11.01    9.12
   5  10   4    4.94   10.48
  -5  10  -4    8.54   11.41
  -6 -10  -4  -11.89   11.52
   6 -10   4    7.95   10.63
  -6 -10  -4  -10.99   10.09
   6  10   4  -10.52   10.02
  -6  10  -4   21.08   12.34
  -7 -10  -4   14.24   11.84
  -7 -10  -4   18.84   12.81
  -7  10  -4   -4.47   11.64
   7  10   4   -8.15   11.76
  -8 -10  -4  103.27   21.17
   8  10   4   88.00   19.79
  -8  10  -4   93.97   20.91
  -9 -10  -4   44.87   16.53
  -9  10  -4   35.11   18.40
   9  10   4   25.23   15.79
   9 -11  -4  -19.08   12.95
  -9  11   4  -27.28   13.10
   9  11  -4   34.71   16.48
   8 -11  -4    7.56   12.72
   8  11  -4   -6.92   11.68
  -8  11   4    4.51   13.56
   7 -11  -4    5.16   12.50
   7  11  -4    7.41   12.47
  -7  11   4    4.48   12.41
   6 -11  -4    2.41   11.93
   6  11  -4    6.34   11.90
  -6  11   4   -4.24   11.83
  -5 -11   4   70.86   14.60
   5 -11  -4   90.14   16.91
  -5  11   4   98.27   18.53
   5  11  -4   51.41   14.64
  -4 -11   4   14.34   10.18
   4 -11  -4   17.74   11.35
   4  11  -4   10.35   10.51
  -4  11   4   17.98   11.95
   3 -11  -4  108.55   17.22
  -3 -11   4   91.36   14.77
  -3  11   4  108.64   17.60
   3  11  -4   94.74   15.78
  -2 -11   4   -1.35    7.91
  -2 -11   4   -4.05    5.99
   2 -11  -4   -3.90    8.52
  -2  11   4    6.54    9.58
   2  11  -4    2.83    9.05
  -1 -11   4   30.45    9.04
   1 -11  -4   38.93   11.76
  -1 -11   4   38.60   10.40
   1 -11  -4   27.61    7.79
   1  11  -4   36.31   11.36
  -1  11   4   17.68    9.93
   0 -11  -4   -8.67    8.69
   0 -11   4   -0.20    7.70
   0 -11  -4    2.15    4.88
   0  11  -4    4.09    9.26
   0  11   4    8.24    9.97
  -1 -11  -4    6.11    4.54
   1 -11   4   21.15    9.27
  -1 -11  -4    4.88    9.34
   1  11   4    1.54    9.82
  -1  11  -4    4.32    9.11
   2 -11   4  111.04   15.80
  -2 -11  -4   92.92   16.97
   2  11   4  104.59   17.10
  -2  11  -4  104.87   15.95
   3 -11   4   55.09   12.18
  -3 -11  -4   42.97   13.28
   3  11   4   35.33   13.43
  -3  11  -4   30.97   11.99
   4 -11   4   17.24   10.99
  -4 -11  -4   39.30   13.18
  -4  11  -4   31.35   13.37
   4  11   4   32.87   13.20
  -5 -11  -4    4.55   11.15
   5 -11   4  -21.74    9.23
   5  11   4   15.18   11.83
  -5  11  -4    3.44   11.87
  -6 -11  -4    5.21   12.38
  -6 -11  -4   17.63   12.33
   6  11   4   27.67   13.73
  -6  11  -4   18.00   13.02
  -7 -11  -4   26.62   14.42
   7  11   4   10.02   14.56
  -7  11  -4   23.06   14.08
  -8 -11  -4   12.10   14.50
   8  11   4    8.05   15.08
  -8  11  -4    8.73   14.46
   9 -12  -4   26.96   16.47
   9  12  -4   14.04   14.88
  -9  12   4    9.50   16.78
   8 -12  -4    3.97   14.12
   8  12  -4    8.05   13.24
  -8  12   4  -21.57   13.42
   7 -12  -4  100.56   20.37
   7  12  -4  139.10   22.09
  -7  12   4  113.74   21.58
   6 -12  -4  200.42   26.62
  -6  12   4  166.71   25.52
   6  12  -4  195.30   25.68
   5 -12  -4    9.81   11.81
   5  12  -4   -8.73   10.46
  -5  12   4   -3.23   12.23
   4 -12  -4    9.43   11.86
  -4  12   4   23.20   12.96
   4  12  -4   10.11   11.29
  -3 -12   4   92.77   15.12
   3 -12  -4   70.89   16.16
  -3  12   4  129.58   19.12
   3  12  -4   89.69   16.77
  -2 -12   4  126.32   16.61
   2 -12  -4   88.19   15.61
  -2  12   4   95.18   17.06
   2  12  -4  111.30   16.93
   1 -12  -4   23.68   11.05
   1 -12  -4    3.66    5.99
  -1 -12   4    4.00    8.82
  -1  12   4   19.02   11.41
   1  12  -4   -0.31    9.64
   0 -12  -4   51.36   13.25
   0 -12  -4   59.05    8.71
   0 -12   4   51.44   12.19
   0  12  -4   56.35   13.68
   0  12   4   48.25   12.88
  -1 -12  -4  198.58   22.57
   1 -12   4  180.45   20.78
  -1  12  -4  163.90   20.34
   1  12   4  157.87   21.11
   2 -12   4  189.97   21.74
  -2 -12  -4  198.39   24.08
  -2  12  -4  221.48   24.50
   2  12   4  249.70   26.17
  -3 -12  -4    8.19   10.96
   3 -12   4    5.61   10.40
  -3  12  -4    4.59   10.75
   3  12   4   -1.47   10.34
  -4 -12  -4   38.76   13.05
  -4  12  -4   67.43   15.88
   4  12   4   57.71   16.14
  -5 -12  -4   79.65   17.31
  -5  12  -4   79.80   17.00
   5  12   4   75.89   16.74
  -6 -12  -4    3.76   13.23
  -6  12  -4   38.13   13.87
   6  12   4    4.78   12.98
  -7 -12  -4   52.43   17.06
  -7  12  -4   80.51   18.59
   7  12   4   97.47   20.12
  -8 -12  -4   92.42   20.73
   8  12   4  111.82   22.64
  -8  12  -4  102.36   22.13
   8 -13  -4   15.56   15.76
  -8  13   4   20.45   17.43
   8  13  -4   25.60   15.84
   7 -13  -4    5.26   14.35
  -7  13   4  -14.87   12.29
   7  13  -4   11.63   13.87
   6 -13  -4    6.97   13.59
  -6  13   4    9.14   15.35
   6  13  -4    9.10   12.94
   5 -13  -4   70.65   16.79
  -5  13   4   51.55   17.23
   5  13  -4   32.58   14.98
   4 -13  -4   71.10   15.87
   4  13  -4   73.17   16.50
  -4  13   4   62.17   16.96
   3 -13  -4  -10.88   10.43
  -3  13   4    8.39   12.92
   3  13  -4    3.10   10.85
   2 -13  -4    7.33    6.86
   2 -13  -4   18.27   11.68
   2  13  -4   13.62   11.70
  -2  13   4   17.43   11.72
   1 -13  -4   46.40   13.35
   1 -13  -4   39.97    8.65
  -1  13   4   30.58   12.88
   1  13  -4   30.80   13.03
   0 -13  -4   61.10    9.23
   0 -13  -4   52.11   13.92
   0 -13   4   57.02   13.32
   0  13  -4   31.72   13.17
   0  13   4   58.65   15.80
  -1 -13  -4  135.94   19.93
   1  13   4  114.87   18.68
  -1  13  -4   91.87   16.57
  -2 -13  -4   56.50   14.90
  -2  13  -4   38.04   12.87
   2  13   4   68.67   15.01
  -3 -13  -4   75.03   17.29
   3  13   4   65.73   16.65
  -3  13  -4   59.77   15.48
  -4 -13  -4   50.26   15.47
   4  13   4   69.92   16.50
  -4  13  -4   56.79   15.31
  -5 -13  -4   17.39   13.80
  -5  13  -4    9.91   13.44
   5  13   4   18.01   13.69
  -6 -13  -4  122.85   21.78
   6  13   4   75.55   19.74
  -6  13  -4   93.35   19.29
  -7 -13  -4   14.46   14.90
   7  13   4   20.92   14.62
  -7  13  -4    6.83   14.52
   7 -14  -4   28.32   17.77
  -7  14   4   30.01   17.35
   7  14  -4   25.73   15.21
   6 -14  -4   18.15   15.77
   6  14  -4   19.40   14.85
  -6  14   4   12.32   14.97
   5 -14  -4    9.37   13.36
  -5  14   4   -7.68   14.18
   5  14  -4   16.24   13.53
   4 -14  -4    1.79   12.18
   4  14  -4    4.54   12.21
  -4  14   4  -14.19   12.01
   3 -14  -4    3.76   12.37
   3  14  -4   29.37   13.51
  -3  14   4   17.56   13.45
   2 -14  -4   -7.12   11.76
   2 -14  -4    4.66    7.53
   2  14  -4   -5.86   11.19
  -2  14   4   10.83   12.71
   1 -14  -4   14.10   12.34
   1 -14  -4    3.01    5.99
  -1  14   4    6.87   10.90
   1  14  -4    6.26   12.41
   0 -14  -4  121.03   20.24
   0  14   4  126.54   21.44
   0  14  -4   88.88   18.22
  -1 -14  -4  170.22   24.01
   1  14   4  199.33   26.09
  -1  14  -4  155.83   22.02
  -2 -14  -4   69.25   16.96
   2  14   4   46.31   15.87
  -2  14  -4   56.10   15.84
  -3 -14  -4   26.04   14.64
  -3  14  -4   16.50   13.38
   3  14   4   18.21   13.55
  -4 -14  -4   66.50   17.30
  -4  14  -4  117.34   19.95
   4  14   4  106.18   20.94
  -5 -14  -4   25.66   14.82
  -5  14  -4   10.41   13.75
   5  14   4   10.25   13.81
  -6 -14  -4    7.78   13.57
   6  14   4    2.14   15.00
  -6  14  -4    1.57   13.58
   6 -15  -4   21.18   16.43
   6  15  -4   15.86   15.28
  -6  15   4  -18.67   14.99
   5 -15  -4  312.35   35.65
  -5  15   4  271.29   33.93
   5  15  -4  256.35   31.44
   4 -15  -4  156.54   23.72
   4  15  -4  147.84   22.00
  -4  15   4  126.10   22.64
   3 -15  -4    1.46   13.22
  -3  15   4    8.14   12.91
   3  15  -4    0.32   13.05
   2 -15  -4   59.59   16.64
   2 -15  -4   52.18   10.81
  -2  15   4   53.66   15.95
   2  15  -4   63.31   16.74
   1 -15  -4  212.24   26.19
   1  15  -4  230.20   28.06
  -1  15   4  219.55   26.84
   0 -15  -4   67.96   17.73
   0  15  -4   61.39   16.42
   0  15   4   62.50   17.10
  -1 -15  -4   21.21   13.77
  -1  15  -4    4.30   12.70
   1  15   4   35.66   14.38
  -2 -15  -4   77.79   17.31
  -2  15  -4   58.42   16.27
   2  15   4   55.72   18.22
  -3 -15  -4  100.44   20.56
   3  15   4   36.27   15.76
  -3  15  -4   70.27   18.10
  -4 -15  -4   59.85   17.98
   4  15   4   96.63   20.39
  -4  15  -4   43.90   16.85
  -5 -15  -4   98.30   20.86
  -5  15  -4  103.44   20.80
   5  15   4   84.72   20.41
  -6 -15  -4  201.70   28.78
   6  15   4  160.55   27.60
  -6  15  -4  183.98   27.02
   5 -16  -4   23.45   16.53
   5  16  -4    0.92   14.90
  -5  16   4   16.01   16.58
   4 -16  -4    3.84   14.93
   4  16  -4   -0.57   13.33
  -4  16   4   11.47   15.12
   3 -16  -4   18.04   15.75
   3  16  -4   38.02   16.07
  -3  16   4   62.39   17.98
   2 -16  -4   48.63   16.03
   2  16  -4   32.37   15.96
  -2  16   4   60.24   18.06
   1 -16  -4   10.38   13.89
   1  16  -4   -3.50   12.68
  -1  16   4    2.67   12.79
   0 -16  -4   55.74   17.18
   0  16   4    7.16   12.93
   0  16  -4   12.87   13.55
  -1 -16  -4   20.21   13.97
  -1  16  -4   -1.70   12.56
   1  16   4   -0.76   13.27
  -2 -16  -4   20.88   15.15
   2  16   4   -0.24   14.11
  -2  16  -4   27.93   14.62
  -3 -16  -4   44.46   16.00
  -3  16  -4   38.92   16.26
   3  16   4    0.33   14.43
  -4 -16  -4   36.29   17.12
   4  16   4   21.52   16.41
  -4  16  -4   -0.23   15.23
  -5 -16  -4   91.82   22.52
  -5  16  -4   88.92   20.67
   5  16   4   66.79   21.77
   4 -17  -4   -6.85   14.85
   4  17  -4   25.37   16.03
  -4  17   4   39.60   18.85
   3 -17  -4   26.22   16.97
  -3  17   4  -10.04   12.88
   3  17  -4    5.34   13.84
   2 -17  -4    4.98   14.47
  -2  17   4   25.75   15.18
   2  17  -4   36.26   16.10
   1 -17  -4   -4.98   13.95
   1  17  -4    9.37   13.40
  -1  17   4    0.51   14.64
   0 -17  -4  -27.96   11.77
   0  17  -4   10.18   14.58
   0  17   4   17.41   14.65
  -1 -17  -4   36.64   15.75
   1  17   4    8.26   13.85
  -1  17  -4   19.78   14.43
  -2 -17  -4    7.97   13.90
  -2  17  -4    5.67   14.86
   2  17   4   16.80   15.84
  -3 -17  -4   18.60   15.25
   3  17   4   26.38   16.12
  -3  17  -4   12.50   15.51
   2  18  -4   65.75   19.53
   1 -18  -4   -1.24   14.61
   1  18  -4   23.22   16.50
  -1  18   4   -8.31   14.32
   0 -18  -4   21.23   14.78
   0  18  -4    7.20   14.87
   0  18   4    0.44   14.65
  -1 -18  -4  218.86   29.96
   1  18   4  160.50   27.69
  -1  18  -4  138.37   24.53
  11   0  -5    0.77   13.92
  10   0  -5    5.35   12.38
   9   0  -5  -16.98    9.71
  -9   0   5  -13.40    9.79
  -8   0   5   12.95    9.77
   8   0  -5   14.94   10.40
  -7   0   5   -1.88    8.37
   7   0  -5   -1.04    8.59
   6   0  -5   -5.15    7.34
   6   0  -5    8.40    7.83
  -6   0   5   -1.63    6.92
   5   0  -5   -3.37    6.50
   5   0  -5   -0.29    6.95
  -5   0   5    9.25    6.58
   4   0  -5    0.65    6.93
   4   0  -5    0.96    5.96
  -4   0   5   -3.77    5.40
  -3   0   5    1.75    4.74
   3   0  -5   -4.33    6.68
   3   0  -5   -6.52    4.68
   2   0  -5   -1.82    3.92
   2   0  -5    4.12    6.02
  -2   0   5    1.95    3.60
   2   0  -5    0.53    3.95
   1   0  -5   -4.09    2.82
   1   0  -5   -5.14    6.35
   1   0  -5    1.49    5.75
   1   0  -5    0.07    2.73
   0   0   5    2.20    1.88
   0   0  -5   -2.47    2.87
   0   0  -5   -5.94    6.39
   0   0  -5    3.03    2.88
   0   0  -5   -7.16    6.52
   1   0   5    3.11    3.31
  -1   0  -5   -0.25    4.14
  -1   0  -5   -0.22    3.92
   1   0   5   -0.79    3.91
   2   0   5    2.48    4.60
  -2   0  -5    3.41    5.45
   2   0   5   -1.77    4.76
   3   0   5   -5.74    4.68
  -3   0  -5    6.07    6.70
   3   0   5   -5.67    5.00
   4   0   5    2.80    6.61
  -4   0  -5   -3.40    6.89
   5   0   5    5.09    7.53
  -5   0  -5   -8.46    7.24
   6   0   5   -9.38    8.17
  -6   0  -5  -19.53    7.86
   7   0   5   12.55   10.28
  -7   0  -5    8.63    9.99
  -8   0  -5   16.10   11.69
   8   0   5    0.44   10.58
   9   0   5    9.12   11.64
  -9   0  -5    6.67   12.57
 -10   0  -5  -23.47   11.57
  11  -1  -5    1.33   14.08
  11   1  -5   11.78   12.65
  11   1  -5    8.38   14.05
  10  -1  -5    6.12   12.56
  10   1  -5   13.45   13.10
  10   1  -5   -3.97   10.09
   9  -1  -5  122.85   19.39
  -9  -1   5   78.59   16.10
   9   1  -5   97.12   17.60
  -9   1   5  124.83   19.58
   8  -1  -5    9.78    9.91
  -8  -1   5   19.53   10.77
   8   1  -5   -6.77    8.30
  -8   1   5   -5.39    9.08
   8   1  -5   -2.43    9.69
  -7  -1   5    9.71    6.03
  -7  -1   5   -3.92    7.54
   7  -1  -5  -13.36    7.64
  -7   1   5   10.00    8.85
   7   1  -5   -7.45    7.38
   7   1  -5   13.47    8.89
   6  -1  -5  451.10   32.58
  -6  -1   5  403.06   31.53
   6   1  -5  400.94   31.09
  -6   1   5  463.82   32.54
   6   1  -5  436.38   32.76
  -5  -1   5   51.05    9.47
   5  -1  -5   76.96   11.04
   5  -1  -5   43.16    9.56
   5   1  -5   43.28    9.46
  -5   1   5   53.01    9.26
   5   1  -5   58.46   10.09
   4  -1  -5  560.16   35.87
   4  -1  -5  524.46   36.45
  -4  -1   5  487.97   35.12
   4   1  -5  526.26   35.85
   4   1  -5  534.27   36.12
  -4   1   5  536.32   35.56
   3  -1  -5   48.88    9.09
   3  -1  -5   55.67    8.01
  -3  -1   5   64.75    7.37
   3   1  -5   50.07    7.48
   3   1  -5   49.76    9.21
   3   1  -5   67.46    8.04
  -3   1   5   63.27    7.98
  -2  -1   5  229.37   16.48
   2  -1  -5  248.89   17.79
  -2  -1   5  249.67   16.50
   2  -1  -5  241.09   17.78
   2  -1  -5  248.07   19.76
   2   1  -5  241.91   18.99
   2   1  -5  266.96   17.19
   2   1  -5  262.87   17.15
  -2   1   5  255.31   17.43
   2   1  -5  251.10   19.92
   1  -1  -5  310.26   25.42
   1  -1  -5  320.75   21.75
   1  -1  -5  318.62   23.84
   1  -1  -5  359.47   22.08
  -1   1   5  318.63   21.37
   1   1  -5  364.76   24.78
   1   1  -5  360.91   24.98
   0  -1  -5    7.81    7.25
   0  -1  -5    5.25    3.90
   0  -1  -5   13.76    6.37
   0  -1  -5    2.42    3.89
   0   1   5    6.13    3.43
   0   1  -5   -1.99    5.88
   0   1  -5    9.48    2.76
   0   1  -5    5.07    2.42
   0   1   5    8.47    3.34
   1  -1   5  514.92   33.81
  -1  -1  -5  493.25   32.27
  -1  -1  -5  443.36   33.30
  -1  -1  -5  469.93   32.21
   1  -1   5  486.17   31.43
  -1   1  -5  533.13   31.80
   1   1   5  486.41   31.96
   1   1   5  515.22   34.30
  -1   1  -5  512.66   31.89
  -2  -1  -5  175.96   14.87
   2  -1   5  162.07   14.36
   2  -1   5  191.85   14.94
   2   1   5  169.63   15.30
  -2   1  -5  181.76   15.22
   2   1   5  172.82   15.01
   3  -1   5   -1.04    5.46
  -3  -1  -5   -5.52    5.80
  -3   1  -5   -5.87    6.28
   3   1   5    1.20    5.51
   3   1   5   -4.77    5.88
  -4  -1  -5  380.11   27.52
   4  -1   5  336.22   26.71
   4   1   5  312.82   26.77
   4   1   5  405.77   29.11
  -4   1  -5  383.25   28.09
  -5  -1  -5  500.41   37.69
   5  -1   5  556.47   37.80
   5   1   5  506.58   37.62
  -5   1  -5  529.68   38.10
  -6  -1  -5   58.10   12.57
   6  -1   5   81.73   13.29
   6   1   5   72.01   13.34
  -6   1  -5   70.56   13.52
   7  -1   5    9.74   10.68
  -7  -1  -5   13.69   10.08
  -7   1  -5   28.84   12.12
   7   1   5   18.94   10.98
  -8  -1  -5   94.77   16.75
   8  -1   5  118.58   18.52
  -8   1  -5  102.63   18.28
   8   1   5   94.13   17.86
   9  -1   5   72.54   15.90
  -9  -1  -5   48.49   15.42
  -9   1  -5   60.32   16.25
   9   1   5   49.97   15.84
 -10  -1  -5   31.58   14.90
 -10   1  -5   -5.19   13.23
  11  -2  -5  100.87   20.20
  11   2  -5  124.72   22.94
  11   2  -5  111.85   18.87
  10  -2  -5    0.45   12.20
  10   2  -5  -13.00    9.87
  10   2  -5   18.53   13.41
   9  -2  -5    3.78   11.57
  -9  -2   5    0.99   11.18
   9   2  -5    6.31   11.40
  -9   2   5    9.27   11.72
   9   2  -5    4.08    9.61
  -8  -2   5   59.81   12.50
   8  -2  -5   54.78   13.50
   8   2  -5   17.40    9.66
   8   2  -5   63.22   13.93
  -8   2   5   59.63   14.17
  -7  -2   5  255.01   23.82
   7  -2  -5  248.22   25.36
  -7  -2   5  263.93   24.16
   7   2  -5  277.84   22.73
  -7   2   5  253.66   24.33
   7   2  -5  285.67   26.36
  -6  -2   5   72.66   11.29
   6  -2  -5   69.78   12.46
  -6  -2   5   45.12    9.17
   6   2  -5   98.96   13.29
   6   2  -5   93.96   11.85
  -6   2   5   86.08   12.43
   5  -2  -5  183.38   17.57
  -5  -2   5  164.83   15.90
  -5  -2   5  176.51   16.28
   5   2  -5  195.07   17.28
  -5   2   5  160.62   16.37
   5   2  -5  141.62   16.17
  -4  -2   5  738.79   45.82
   4  -2  -5  732.51   46.67
   4  -2  -5  698.53   46.96
  -4  -2   5  697.82   48.90
   4   2  -5  711.96   46.41
  -4   2   5  647.28   46.06
   4   2  -5  716.36   46.27
  -3  -2   5    6.21    4.61
   3  -2  -5    7.46    6.97
   3  -2  -5   -2.76    5.13
  -3  -2   5   -2.09    3.82
  -3  -2   5    2.82    4.47
   3   2  -5    2.42    5.21
   3   2  -5    0.45    5.10
  -3   2   5   -2.18    4.92
   3   2  -5    1.32    6.31
  -2  -2   5   18.80    4.15
   2  -2  -5   12.75    7.43
   2  -2  -5   17.67    5.49
   2   2  -5   16.14    4.61
  -2   2   5   14.44    5.12
   2   2  -5   14.76    6.78
   2   2  -5   20.04    5.40
   2   2  -5   14.65    4.79
   1  -2  -5  634.99   41.41
   1  -2  -5  633.96   44.70
   1  -2  -5  636.24   40.42
  -1  -2   5  574.89   41.65
   1  -2  -5  658.46   40.66
   1   2  -5  657.85   39.28
   1   2  -5  656.58   39.18
  -1   2   5  652.18   40.26
   1   2  -5  670.18   41.78
   0  -2  -5  114.27   13.17
   0  -2  -5  118.21   10.63
   0  -2  -5  123.93   12.84
   0  -2  -5  120.30   10.39
   0  -2   5  110.45    8.43
   0   2  -5  110.98    8.92
   0   2   5  104.47   10.33
   0   2  -5  113.78    8.52
   0   2   5  116.02   10.08
   0   2  -5   89.01   11.22
   1  -2   5   19.38    4.29
  -1  -2  -5   14.00    8.22
  -1  -2  -5   24.22    5.80
  -1  -2  -5   18.12    6.71
  -1   2  -5   17.91    4.61
   1   2   5   23.60    5.85
  -1   2  -5   26.71    5.27
   1   2   5   17.96    5.03
   2  -2   5   57.37    7.76
  -2  -2  -5   62.54    9.00
  -2   2  -5   72.10    8.88
   2   2   5   61.14    8.33
   2   2   5   70.06    9.14
  -3  -2  -5  663.30   42.09
   3  -2   5  637.63   41.20
  -3  -2  -5  571.61   41.56
  -3   2  -5  585.63   41.55
   3   2   5  683.20   44.78
   3   2   5  606.11   41.81
   4  -2   5  118.01   12.96
  -4  -2  -5  103.15   13.40
  -4   2  -5   80.75   12.34
   4   2   5  112.91   14.01
   4   2   5  111.35   13.77
  -5  -2  -5    7.93    7.81
   5  -2   5    1.86    7.29
  -5   2  -5   22.22    9.10
   5   2   5   -2.03    7.55
   5   2   5   -8.10    5.73
  -6  -2  -5  174.62   20.31
   6  -2   5  199.56   20.44
  -6   2  -5  139.07   19.45
   6   2   5  207.77   21.62
  -7  -2  -5  119.91   17.62
   7  -2   5   91.12   15.67
   7   2   5  108.39   17.26
  -7   2  -5   63.73   15.16
   8  -2   5   15.65   11.36
  -8  -2  -5   -2.90   10.58
  -8   2  -5   -3.58   11.71
   8   2   5    0.75   10.99
  -9  -2  -5    4.02   11.95
  -9   2  -5  -17.87   11.78
   9   2   5    7.20   12.70
 -10  -2  -5  205.48   27.35
 -10   2  -5  179.67   26.71
  11  -3  -5   45.59   17.52
  11   3  -5   49.52   18.09
  10  -3  -5   18.26   14.00
  10   3  -5    5.95   13.92
  10   3  -5    3.11    9.56
   9  -3  -5    3.49   12.32
  -9   3   5   -3.52   10.60
   9   3  -5    2.22    8.59
   9   3  -5   -1.80   11.25
   8  -3  -5  175.50   22.84
  -8  -3   5  213.00   22.93
  -8   3   5  232.95   23.28
   8   3  -5  247.47   21.75
   8   3  -5  202.63   23.72
   7  -3  -5   -1.19    8.95
  -7  -3   5    5.02    7.88
  -7  -3   5   -1.07    5.93
  -7   3   5    7.85    8.72
   7   3  -5   -0.92    9.30
   7   3  -5    6.16    7.32
  -6  -3   5    1.55    5.28
  -6  -3   5   19.16    7.52
   6  -3  -5   -1.86    7.35
  -6  -3   5    7.20    7.04
   6   3  -5    8.82    8.38
   6   3  -5    7.37    6.73
  -6   3   5    4.84    7.61
  -5  -3   5    7.88    6.27
   5  -3  -5   16.16    7.83
  -5  -3   5   16.37    6.94
  -5  -3   5   18.61    6.18
   5   3  -5   18.52    7.79
   5   3  -5   11.07    6.85
  -5   3   5    6.81    7.00
   4  -3  -5   36.48   10.03
  -4  -3   5   21.99    5.99
  -4  -3   5   27.01    6.75
   4  -3  -5   19.57    7.31
   4   3  -5   30.40    7.73
   4   3  -5   28.82    7.70
  -4   3   5   10.79    6.74
   3  -3  -5  320.82   24.18
  -3  -3   5  314.18   22.80
  -3  -3   5  342.15   24.49
   3  -3  -5  307.18   25.03
  -3   3   5  348.63   23.65
   3   3  -5  324.89   23.36
   3   3  -5  329.52   24.08
   2  -3  -5   92.98   10.25
  -2  -3   5   77.05    8.34
  -2  -3   5   82.56    8.11
   2  -3  -5   73.41   10.28
  -2   3   5   84.60    9.57
   2   3  -5   99.84    9.27
   2   3  -5   96.25    8.81
   2   3  -5   80.04   10.61
   2   3  -5   98.93    8.75
   2   3  -5   96.39    8.66
  -1  -3   5  100.95    8.24
   1  -3  -5  104.17   11.55
   1  -3  -5   97.12    9.89
  -1  -3   5   87.22    7.42
   1   3  -5   70.13    9.82
   1   3  -5   92.61    8.25
   1   3  -5   93.91    8.47
  -1   3   5   92.00    9.45
   0  -3  -5  266.08   20.07
   0  -3  -5  283.24   21.24
   0  -3  -5  268.45   23.27
   0  -3   5  287.74   19.67
   0  -3   5  289.52   18.21
   0   3  -5  265.00   18.48
   0   3  -5  279.54   18.77
   0   3   5  265.99   21.02
   0   3   5  280.56   20.13
  -1  -3  -5   11.87    5.87
  -1  -3  -5    3.78    7.29
   1  -3   5   12.93    4.23
  -1  -3  -5   16.48    6.34
  -1   3  -5   18.71    5.03
  -1   3  -5   10.77    5.40
   1   3   5    8.57    5.54
   1   3   5   16.31    5.71
   2  -3   5   58.75    7.90
  -2  -3  -5   56.96    9.35
  -2  -3  -5   68.98   11.78
   2   3   5   67.88    9.13
  -2   3  -5   70.58    9.24
   2   3   5   74.29    9.34
  -3  -3  -5   -8.30    6.74
   3  -3   5    7.41    5.54
  -3  -3  -5    2.06    6.78
   3   3   5   10.24    5.62
   3   3   5   -2.43    6.28
  -3   3  -5   11.37    6.92
   4  -3   5   33.49    7.68
  -4  -3  -5   18.90    8.79
  -4  -3  -5   27.37    8.80
   4   3   5   19.90    7.60
  -4   3  -5   41.04    9.38
   4   3   5   16.10    8.29
  -5  -3  -5   33.62   10.27
   5  -3   5   31.69    8.89
  -5  -3  -5   26.52    9.79
  -5   3  -5   19.79    9.04
   5   3   5   31.04    9.63
   5   3   5   72.06   12.39
  -6  -3  -5    9.19    8.88
  -6  -3  -5   14.87    9.26
   6  -3   5   26.34    9.99
   6   3   5   24.71   10.14
   6   3   5   45.71   11.73
  -6   3  -5   18.95   10.39
  -7  -3  -5   14.89   10.12
  -7  -3  -5   29.30   10.98
   7  -3   5   26.18   11.12
   7   3   5   45.32   12.28
  -7   3  -5   34.38   12.91
  -8  -3  -5   69.98   15.32
   8  -3   5   89.28   16.60
  -8  -3  -5   40.09   14.03
  -8   3  -5  105.36   18.68
   8   3   5  105.99   18.44
  -9  -3  -5   -0.08   10.86
  -9  -3  -5    1.20   10.80
   9   3   5  -15.17   10.00
  -9   3  -5    2.36   12.58
 -10  -3  -5   16.43   13.98
 -10  -3  -5   11.59   14.26
 -10   3  -5    5.83   15.17
  11  -4  -5  110.77   20.58
  11   4  -5   98.33   21.47
  10  -4  -5   -0.88   12.21
  10   4  -5    3.10   13.07
 -10   4   5    2.26   13.99
   9  -4  -5   84.02   17.10
   9   4  -5   62.42   13.01
   9   4  -5   82.02   17.38
  -9   4   5   97.52   16.98
  -8  -4   5  814.66   55.49
  -8  -4   5  824.42   55.78
   8  -4  -5  803.44   57.07
   8   4  -5  773.10   52.96
  -8   4   5  741.77   55.72
   8   4  -5  780.88   57.04
  -7  -4   5  215.84   21.28
  -7  -4   5  184.23   20.78
   7  -4  -5  186.87   21.58
  -7  -4   5  189.34   20.46
   7   4  -5  165.92   21.00
   7   4  -5  196.61   18.94
  -7   4   5  210.75   22.11
  -6  -4   5   13.53    6.58
   6  -4  -5   19.00    9.05
  -6  -4   5    0.07    6.83
   6   4  -5    0.15    6.33
   6   4  -5   -2.88    7.84
  -6   4   5   12.29    8.60
  -5  -4   5   42.84    8.03
  -5  -4   5   57.69    9.19
   5  -4  -5   45.55   10.14
  -5   4   5   45.72    9.77
   5   4  -5   45.76    8.79
   5   4  -5   46.63   10.24
  -4  -4   5  156.34   14.45
  -4  -4   5  111.42   13.82
   4  -4  -5  143.24   15.35
  -4   4   5  172.75   15.51
   4   4  -5  141.17   14.03
   4   4  -5  166.62   15.22
  -3  -4   5   10.77    5.35
   3  -4  -5    7.21    7.56
   3  -4  -5   -1.20    6.16
  -3  -4   5   -3.07    4.30
   3   4  -5    8.34    6.08
   3   4  -5   -3.22    5.38
  -3   4   5   -7.98    5.55
   2  -4  -5  974.10   63.34
  -2  -4   5 1000.61   62.00
   2  -4  -5 1042.04   63.76
  -2  -4   5  983.92   66.78
   2   4  -5  988.71   62.53
   2   4  -5  983.19   62.23
   2   4  -5  995.67   62.61
  -2   4   5 1030.27   63.45
  -1  -4   5  261.23   19.69
   1  -4  -5  273.64   20.51
   1  -4  -5  283.28   20.88
  -1  -4   5  258.22   18.17
   1   4  -5  269.68   19.18
  -1   4   5  247.18   20.00
   1   4  -5  278.76   18.62
   1   4  -5  279.96   20.90
   0  -4  -5  152.47   13.98
   0  -4  -5  173.74   14.11
   0  -4   5  131.93   11.41
   0  -4  -5  126.00   15.36
   0  -4   5  129.16   12.41
   0   4  -5  157.90   11.90
   0   4   5  137.82   13.27
   0   4  -5  144.34   12.35
   0   4   5  157.48   14.09
  -1  -4  -5    4.99    5.65
   1  -4   5   10.38    4.88
  -1  -4  -5    6.15    7.64
  -1  -4  -5    6.76    5.72
   1   4   5   10.55    6.12
  -1   4  -5   -2.65    5.10
  -1   4  -5   11.54    4.95
   1   4   5    5.36    5.99
  -2  -4  -5  469.78   35.86
   2  -4   5  486.30   31.58
  -2  -4  -5  527.84   33.54
   2   4   5  441.56   34.83
  -2   4  -5  479.98   32.46
   2   4   5  440.89   32.64
  -3  -4  -5  951.91   69.38
   3  -4   5  984.75   63.89
  -3  -4  -5 1001.86   65.26
   3   4   5 1035.33   69.33
   3   4   5 1036.47   65.10
  -3   4  -5 1002.02   64.56
  -4  -4  -5  419.28   31.02
   4  -4   5  384.69   29.47
  -4  -4  -5  397.51   32.67
   4   4   5  422.07   32.57
  -4   4  -5  393.54   30.48
   4   4   5  417.11   30.94
   5  -4   5   30.45    8.99
  -5  -4  -5   32.27   10.04
   5   4   5   41.15    9.98
  -5   4  -5   55.91   11.69
   5   4   5   45.31   11.02
  -6  -4  -5  338.21   32.17
   6  -4   5  384.99   31.28
   6   4   5  460.91   33.73
  -6   4  -5  361.93   32.48
   6   4   5  461.99   35.29
  -7  -4  -5    4.73   10.15
   7  -4   5   14.41   10.09
  -7  -4  -5    3.92   10.03
  -7   4  -5   16.52   11.99
   7   4   5    6.28   10.48
  -8  -4  -5   -3.91   11.05
  -8  -4  -5   -1.75   10.96
   8  -4   5   -0.30   10.36
   8   4   5   -0.32   10.72
  -8   4  -5  -10.64   11.81
  -9  -4  -5   75.74   18.06
  -9  -4  -5   70.63   17.48
  -9   4  -5   39.96   15.97
   9   4   5   57.32   16.17
 -10  -4  -5   73.20   19.70
 -10  -4  -5   68.59   18.68
 -10   4  -5   90.75   21.50
  11  -5  -5   16.75   15.91
  11   5  -5   20.62   15.31
  10  -5  -5  205.09   26.60
  10   5  -5  165.01   25.05
   9  -5  -5   78.59   17.01
   9   5  -5   60.56   16.84
  -9   5   5   84.39   16.40
   8  -5  -5   19.40   12.27
  -8  -5   5   13.39   10.59
   8   5  -5  -10.35   10.05
  -8   5   5   19.30   11.02
   8   5  -5   40.24    9.41
  -7  -5   5   69.43   13.09
   7  -5  -5   68.21   14.09
   7   5  -5   95.75   12.02
  -7   5   5   84.01   14.26
   7   5  -5   55.35   13.31
   6  -5  -5  163.74   19.19
  -6  -5   5  143.98   16.00
  -6  -5   5  137.38   16.30
   6   5  -5  166.81   15.55
   6   5  -5  133.46   16.99
  -6   5   5  141.55   16.86
  -5  -5   5  128.94   14.33
   5  -5  -5  113.62   14.86
  -5  -5   5  107.83   13.46
   5   5  -5  118.75   14.32
   5   5  -5  110.04   12.40
  -5   5   5  121.00   15.01
  -4  -5   5    5.21    5.19
  -4  -5   5   13.00    6.49
   4  -5  -5   10.25    7.62
   4   5  -5   14.06    7.31
   4   5  -5    2.63    5.81
  -4   5   5   13.93    7.37
  -3  -5   5  485.62   35.97
  -3  -5   5  486.90   33.43
   3  -5  -5  481.37   35.43
   3  -5  -5  539.04   35.14
  -3   5   5  526.12   35.32
   3   5  -5  510.37   33.51
   3   5  -5  474.17   34.02
  -2  -5   5 1568.48   97.71
   2  -5  -5 1576.57   98.43
  -2  -5   5 1535.46  105.24
   2  -5  -5 1606.87   99.13
  -2   5   5 1547.36   99.07
   2   5  -5 1703.82   97.58
   2   5  -5 1576.57   98.28
   1  -5  -5   -2.44    6.03
  -1  -5   5    0.36    4.40
  -1  -5   5    8.57    4.50
   1  -5  -5   -5.16    5.58
  -1   5   5   -1.86    5.59
   1   5  -5    7.17    5.50
  -1   5   5    4.64    5.73
   1   5  -5   -2.09    4.23
   0  -5   5  526.55   32.96
   0  -5   5  553.31   35.81
   0  -5  -5  516.97   33.80
   0  -5  -5  499.93   34.69
   0   5  -5  519.10   33.59
   0   5  -5  523.13   33.19
   0   5   5  511.63   34.88
   0   5   5  388.14   36.13
  -1  -5  -5 1027.51   64.79
  -1  -5  -5 1008.71   71.36
   1  -5   5 1032.98   65.03
  -1  -5  -5 1034.92   66.45
   1   5   5 1060.11   66.58
   1   5   5 1077.62   71.11
  -1   5  -5 1026.93   65.61
  -2  -5  -5   86.06   12.71
   2  -5   5   78.84    9.49
  -2  -5  -5   38.78    9.65
  -2  -5  -5   66.25    8.46
   2   5   5   57.75    9.73
   2   5   5   49.95    9.23
  -2   5  -5   56.27    9.63
  -3  -5  -5   18.96    8.49
  -3  -5  -5   19.08    9.10
   3  -5   5   28.07    7.18
   3   5   5   37.03    8.88
  -3   5  -5   28.16    8.43
   3   5   5   28.47    7.93
   4  -5   5   78.76   11.46
  -4  -5  -5   70.25   11.76
  -4  -5  -5   66.30   12.15
   4   5   5   48.36   10.31
  -4   5  -5   54.38   11.14
   4   5   5   79.10   12.26
  -5  -5  -5   68.00   13.38
   5  -5   5   75.61   12.14
  -5  -5  -5   56.76   13.41
   5   5   5   66.73   12.65
  -5   5  -5   56.71   12.84
   5   5   5   81.38   13.81
  -6  -5  -5   14.53   10.00
  -6  -5  -5   11.70    9.78
   6  -5   5   16.89    8.90
   6   5   5   -4.21    8.90
  -6   5  -5   13.62   10.44
   7  -5   5    6.78   10.07
  -7  -5  -5   28.85   12.04
   7   5   5   -8.81    9.95
  -7   5  -5   25.48   12.59
  -8  -5  -5  272.27   29.94
   8   5   5  278.76   30.41
  -8   5  -5  319.82   32.26
  -9  -5  -5   15.99   13.34
  -9   5  -5    6.12   14.58
   9   5   5   24.80   14.19
 -10  -5  -5    9.32   14.37
 -10   5  -5   -9.48   15.16
  11  -6  -5    4.01   14.93
  11   6  -5   -9.28   13.22
  10  -6  -5   -0.83   12.88
  10   6  -5   -7.05   12.07
   9  -6  -5   15.59   13.22
   9   6  -5   28.99   13.35
  -9   6   5   20.50   13.16
   8  -6  -5   22.60   11.29
   8   6  -5    6.11   10.89
  -8   6   5   25.32   12.50
  -7  -6   5   10.89    9.09
   7  -6  -5    8.30    9.86
   7   6  -5    6.85    7.18
   7   6  -5   -6.03    9.25
  -7   6   5   11.63    9.96
   6  -6  -5   11.94   10.04
  -6  -6   5   24.27    8.70
  -6  -6   5    9.33    7.06
  -6   6   5   19.29    9.49
   6   6  -5   24.46    7.10
   6   6  -5   18.23   10.01
   5  -6  -5   44.90   11.28
  -5  -6   5   55.43   10.11
  -5  -6   5   41.37    9.57
  -5   6   5   32.71    9.98
   5   6  -5   47.44   10.54
   5   6  -5   47.19    8.31
  -4  -6   5   31.14    8.35
   4  -6  -5   23.95    8.90
  -4  -6   5   28.36    7.40
  -4   6   5   19.74    8.64
   4   6  -5   21.51    7.92
   4   6  -5   38.71    7.61
   3  -6  -5  143.54   16.38
  -3  -6   5  162.11   15.36
   3  -6  -5  137.92   15.83
  -3  -6   5  156.03   14.92
   3   6  -5  179.22   14.46
   3   6  -5  150.91   15.41
  -3   6   5  145.08   15.77
   2  -6  -5  143.56   15.90
   2  -6  -5  194.64   17.19
  -2  -6   5  169.49   14.37
  -2  -6   5  153.32   14.97
   2   6  -5  178.07   15.93
  -2   6   5  144.33   15.75
  -1  -6   5  149.58   13.59
  -1  -6   5  153.78   14.51
   1  -6  -5  176.26   15.75
   1  -6  -5  132.67   15.00
  -1   6   5  182.67   16.75
  -1   6   5  198.65   17.82
   1   6  -5  142.73   14.52
   0  -6   5  251.92   20.65
   0  -6   5  256.16   18.88
   0  -6  -5  245.39   19.24
   0  -6  -5  256.08   20.93
   0   6  -5  262.51   20.14
   0   6   5  306.17   22.68
   0   6   5  220.99   20.93
  -1  -6  -5   -3.00    6.23
  -1  -6  -5    4.03    7.45
  -1  -6  -5    2.16    5.00
   1  -6   5    1.89    5.03
   1   6   5    9.30    6.76
   1   6   5   -4.68    5.94
  -1   6  -5    3.91    6.34
  -2  -6  -5  212.19   15.47
   2  -6   5  190.59   16.42
  -2  -6  -5  199.98   20.42
  -2  -6  -5  156.88   17.58
  -2   6  -5  207.97   18.00
   2   6   5  148.18   17.37
   2   6   5  211.37   19.18
  -3  -6  -5    8.31    8.06
   3  -6   5   14.45    6.68
  -3  -6  -5   -0.10    7.26
   3   6   5   11.67    7.84
   3   6   5    4.48    7.63
  -3   6  -5   -8.34    6.73
  -4  -6  -5    4.38    8.79
  -4  -6  -5   28.25    9.98
   4  -6   5    9.29    7.43
   4   6   5   17.19    7.37
   4   6   5   14.46    8.78
  -4   6  -5   22.02    9.20
  -5  -6  -5   10.66    9.48
   5  -6   5   13.00    8.35
  -5  -6  -5   23.16   10.23
  -5   6  -5    8.76    9.81
   5   6   5    8.62    9.20
   5   6   5    4.12    8.99
  -6  -6  -5   56.20   13.45
  -6  -6  -5   43.01   12.62
   6  -6   5   52.86   11.95
   6   6   5   38.94   13.20
  -6   6  -5   28.32   12.13
   7  -6   5   32.51   12.41
  -7  -6  -5   22.34   12.70
  -7  -6  -5   43.23   13.91
   7   6   5   15.16   11.73
  -7   6  -5   34.81   13.74
  -8  -6  -5   -1.10   12.03
  -8  -6  -5   18.49   13.09
   8   6   5    7.11   12.34
  -8   6  -5   -8.30   12.46
  -9  -6  -5    8.68   13.43
  -9  -6  -5    5.88   14.08
  -9   6  -5   19.12   14.99
   9   6   5    9.27   13.38
 -10  -6  -5   23.49   14.72
 -10   6  -5    1.14   16.16
  10  -7  -5  124.56   22.14
  10   7  -5  122.02   21.79
   9  -7  -5   89.89   18.50
   9   7  -5   59.34   16.70
  -9   7   5   42.54   15.54
   8  -7  -5  -10.12   10.36
   8   7  -5    6.71   11.50
  -8   7   5   -7.01   10.72
   7  -7  -5   27.29   12.00
   7   7  -5   34.57   11.48
  -7   7   5   41.96   12.95
  -6  -7   5  107.24   15.96
  -6  -7   5  123.01   15.81
   6  -7  -5  132.07   17.73
   6   7  -5   89.34   15.56
  -6   7   5  121.27   16.66
   6   7  -5  125.28   12.91
  -5  -7   5   54.07    9.69
   5  -7  -5   47.85   11.94
  -5  -7   5   68.19   11.74
   5   7  -5   78.50    9.64
  -5   7   5   43.84   11.24
   5   7  -5   55.27   11.40
  -4  -7   5    7.52    6.98
   4  -7  -5    0.93    7.87
  -4  -7   5    6.80    5.60
   4   7  -5   -4.72    6.85
   4   7  -5   -3.91    5.33
  -4   7   5   -0.19    8.28
  -3  -7   5  168.82   17.08
  -3  -7   5  182.63   18.47
   3  -7  -5  220.98   20.55
   3  -7  -5  182.96   18.80
   3   7  -5  211.40   18.86
   3   7  -5  172.94   15.73
  -3   7   5  235.84   20.51
  -2  -7   5  397.98   25.78
   2  -7  -5  324.44   27.19
  -2  -7   5  331.40   27.21
   2  -7  -5  355.45   26.52
  -2   7   5  310.53   28.16
   2   7  -5  392.44   27.16
  -2   7   5  353.26   27.33
  -1  -7   5   10.76    5.56
   1  -7  -5    9.73    6.60
   1  -7  -5   12.86    7.46
  -1  -7   5   16.28    5.89
   1   7  -5   14.59    6.78
  -1   7   5   22.27    8.06
  -1   7   5    6.45    6.82
   0  -7  -5  362.24   27.58
   0  -7  -5  396.95   25.77
   0  -7   5  355.60   27.79
   0  -7   5  386.80   25.72
   0   7   5  373.99   27.86
   0   7  -5  392.15   27.15
   0   7   5  268.50   28.30
  -1  -7  -5  305.82   22.25
  -1  -7  -5  286.79   24.77
   1  -7   5  324.86   23.25
  -1   7  -5  306.81   23.76
   1   7   5  324.58   25.17
   1   7   5  312.00   26.18
   2  -7   5  266.28   21.37
  -2  -7  -5  273.86   23.36
  -2  -7  -5  297.45   24.87
  -2  -7  -5  279.61   19.54
   2   7   5  288.19   23.63
  -2   7  -5  278.78   22.60
   2   7   5  195.94   23.20
   3  -7   5  189.32   17.27
  -3  -7  -5  174.42   18.78
  -3  -7  -5  152.85   17.89
   3   7   5  146.11   17.81
  -3   7  -5  114.54   15.88
   3   7   5  149.27   17.68
  -4  -7  -5   74.41   13.33
   4  -7   5   78.11   12.26
  -4  -7  -5  111.88   15.42
  -4   7  -5   78.62   13.73
   4   7   5   94.97   13.30
   4   7   5  124.45   15.91
   5  -7   5   77.99   13.37
  -5  -7  -5  134.87   17.62
  -5  -7  -5  106.76   16.86
  -5   7  -5  127.04   16.79
   5   7   5   98.03   15.43
  -6  -7  -5  155.11   20.64
  -6  -7  -5  138.79   19.62
   6  -7   5  156.77   19.13
  -6   7  -5  110.46   18.55
   6   7   5  149.36   20.43
  -7  -7  -5    5.40   11.41
  -7  -7  -5    8.27   11.74
  -7   7  -5   18.60   12.79
   7   7   5    8.43   11.59
  -8  -7  -5  277.64   30.56
  -8  -7  -5  221.74   28.36
  -8   7  -5  260.56   29.69
   8   7   5  251.34   30.07
  -9  -7  -5   24.06   15.40
  -9  -7  -5   66.30   17.70
  -9   7  -5   -1.90   14.01
   9   7   5   42.13   16.00
 -10  -7  -5    8.74   15.54
 -10   7  -5  -38.95   13.57
  10  -8  -5   17.79   15.49
  10   8  -5  -15.48   12.19
   9  -8  -5    0.58   10.92
   9   8  -5   -1.75   12.27
  -9   8   5    8.07   13.90
   8  -8  -5  128.27   20.90
  -8   8   5  109.89   20.21
   8   8  -5  132.52   20.64
   7  -8  -5   -0.27   10.29
  -7   8   5   11.58   11.74
   7   8  -5   24.21   11.33
  -6  -8   5  -11.28    7.30
   6  -8  -5   -2.51    9.57
  -6   8   5   10.90   10.06
   6   8  -5   -1.61    8.93
  -5  -8   5   25.53    8.66
  -5  -8   5   16.60    8.97
   5  -8  -5   22.31    9.74
   5   8  -5    8.09    6.36
   5   8  -5    5.98    9.42
  -5   8   5   16.62   10.67
   4  -8  -5  556.84   41.12
  -4  -8   5  577.24   42.03
  -4  -8   5  554.65   39.13
  -4   8   5  612.47   41.61
   4   8  -5  506.80   39.85
   4   8  -5  538.14   36.48
  -3  -8   5  245.52   19.82
   3  -8  -5  231.48   22.90
  -3  -8   5  226.64   21.00
  -3   8   5  227.75   22.34
   3   8  -5  233.78   22.15
   2  -8  -5   27.25    9.23
  -2  -8   5   20.84    6.80
   2  -8  -5   38.20    8.96
  -2  -8   5   25.52    7.44
  -2   8   5   46.56   10.29
   2   8  -5   36.06    9.24
  -2   8   5   36.89    9.55
   1  -8  -5  141.86   14.04
   1  -8  -5  153.55   16.82
  -1  -8   5  104.27   12.98
  -1  -8   5  133.11   13.79
  -1   8   5  137.06   15.42
   1   8  -5  121.51   14.66
  -1   8   5  109.18   14.98
   0  -8  -5  795.75   52.08
   0  -8   5  790.21   52.81
   0  -8   5  849.48   57.39
   0   8   5  786.59   58.22
   0   8  -5  805.08   54.02
   0   8   5  872.10   55.35
  -1  -8  -5   82.80   13.10
   1  -8   5  109.09   12.85
  -1  -8  -5  112.19   11.18
   1   8   5  123.78   15.59
   1   8   5  105.05   14.35
  -1   8  -5  125.93   13.91
  -2  -8  -5   80.37   13.18
  -2  -8  -5   62.78    8.10
   2  -8   5   65.58   10.49
   2   8   5   91.46   13.83
  -2   8  -5   44.77   10.36
   2   8   5   53.75   11.37
  -3  -8  -5  346.72   29.52
  -3  -8  -5  355.96   30.72
   3  -8   5  337.66   27.50
   3   8   5  375.54   29.40
  -3   8  -5  363.13   29.14
   3   8   5  368.09   30.70
   4  -8   5   26.95    9.54
  -4  -8  -5   40.35   11.86
  -4  -8  -5   14.60   10.27
   4   8   5   26.28    9.22
  -4   8  -5   21.02   10.36
   4   8   5   23.70    9.99
  -5  -8  -5   54.59   13.38
   5  -8   5   72.34   12.98
  -5  -8  -5   60.79   13.64
  -5   8  -5   47.49   13.23
   5   8   5   59.97   13.65
  -6  -8  -5  155.40   21.35
  -6  -8  -5  207.84   23.43
   6  -8   5  201.08   22.65
  -6   8  -5  164.00   21.69
   6   8   5  224.78   24.18
  -7  -8  -5  101.54   19.24
  -7  -8  -5  116.86   20.08
  -7   8  -5  118.45   19.73
   7   8   5  105.16   18.99
  -8  -8  -5   39.16   15.16
  -8  -8  -5    6.44   13.29
  -8   8  -5   23.66   15.21
   8   8   5   30.57   14.94
  -9  -8  -5   17.51   14.96
  -9   8  -5    5.81   15.63
   9   8   5    5.34   13.93
  10  -9  -5   12.38   15.89
  10   9  -5  -15.58   12.75
   9  -9  -5   20.91   14.47
  -9   9   5   46.50   15.60
   9   9  -5   12.69   12.92
   8  -9  -5   10.26   12.75
  -8   9   5   35.54   14.62
   8   9  -5   15.33   12.01
   7  -9  -5    4.94   10.63
  -7   9   5  -13.86   10.54
   7   9  -5   -2.71   10.52
   6  -9  -5    0.29    9.89
  -6   9   5   18.37   12.49
   6   9  -5    5.85   10.26
  -5  -9   5   33.29   10.84
   5  -9  -5   45.11   12.20
  -5  -9   5   44.88    9.90
  -5   9   5   21.73   11.51
   5   9  -5   49.34   12.18
   4  -9  -5   44.51   11.55
  -4  -9   5   31.95    8.67
  -4  -9   5   33.13    9.91
   4   9  -5   42.39   11.44
  -4   9   5   41.86   12.06
  -3  -9   5   72.88   11.71
   3  -9  -5   66.40   12.77
  -3  -9   5   88.20   11.93
   3   9  -5   63.45   12.74
  -3   9   5   73.66   12.46
  -3   9   5   61.99   12.80
   2  -9  -5   -5.15    6.57
  -2  -9   5    1.36    6.43
  -2  -9   5    0.58    5.90
   2  -9  -5   -2.63    7.58
  -2   9   5   -4.47    7.15
  -2   9   5   -1.91    7.94
   2   9  -5    6.10    7.85
  -1  -9   5  348.28   27.14
   1  -9  -5  340.90   26.59
   1  -9  -5  332.91   28.95
  -1  -9   5  377.49   29.48
  -1   9   5  429.82   31.11
  -1   9   5  382.37   29.52
   1   9  -5  330.25   28.16
   0  -9  -5   21.87    6.52
   0  -9  -5   27.03    9.26
   0  -9   5   22.33    7.29
   0  -9   5   20.11    7.25
   0   9   5   19.53    8.74
   0   9   5   16.62    9.02
   0   9  -5    7.53    7.70
   1  -9   5   -3.90    6.16
  -1  -9  -5   14.26    8.88
  -1  -9  -5   12.78    5.31
   1   9   5   11.34    8.20
   1   9   5   19.31    9.21
  -1   9  -5   -6.71    7.07
  -2  -9  -5  162.72   19.38
  -2  -9  -5  169.93   13.87
   2  -9   5  170.64   17.57
   2   9   5  149.37   18.58
   2   9   5  170.44   19.77
  -2   9  -5  185.36   19.14
   3  -9   5   11.15    8.06
  -3  -9  -5    0.59    8.72
  -3  -9  -5   14.35    9.24
   3   9   5    5.78    7.38
   3   9   5  -12.47    8.36
  -3   9  -5    1.65    8.65
  -4  -9  -5   32.86   11.55
   4  -9   5   49.98   11.27
  -4  -9  -5   27.71   11.33
   4   9   5   27.72   11.73
  -4   9  -5   21.53   10.99
  -5  -9  -5   -6.58    9.66
  -5  -9  -5   -5.99    9.98
   5  -9   5   -4.02    8.62
  -5   9  -5   -0.81    9.82
   5   9   5   15.18   10.97
  -6  -9  -5   10.78   11.47
  -6  -9  -5   11.64   11.61
   6   9   5    3.15   11.63
  -6   9  -5   -0.47   11.31
  -7  -9  -5   35.81   14.42
  -7  -9  -5   74.69   16.43
   7   9   5   49.51   16.30
  -7   9  -5   50.21   15.99
  -8  -9  -5   13.65   14.13
  -8  -9  -5    4.47   13.91
   8   9   5   22.93   15.47
  -8   9  -5   23.16   14.50
  -9  -9  -5   31.88   15.97
  -9   9  -5   18.19   15.46
   9   9   5   13.70   14.94
   9 -10  -5    7.31   13.76
  -9  10   5    1.47   14.10
   9  10  -5    2.17   12.81
   8 -10  -5   16.66   14.16
   8  10  -5   15.74   13.23
  -8  10   5   -1.91   12.86
   7 -10  -5    9.62   12.34
  -7  10   5    5.22   12.34
   7  10  -5   21.52   12.91
   6 -10  -5   -7.92    9.79
  -6  10   5   -1.74   11.93
   6  10  -5   18.73   11.01
   5 -10  -5   90.19   16.39
  -5  10   5  106.94   18.08
   5  10  -5  100.20   16.33
  -4 -10   5  136.43   16.67
   4 -10  -5  128.14   18.16
  -4 -10   5   95.04   15.33
  -4  10   5  134.85   18.58
   4  10  -5   90.21   15.32
  -3 -10   5    0.35    6.20
   3 -10  -5   10.13    9.14
  -3 -10   5  -17.68    6.38
  -3  10   5   12.47    9.29
   3  10  -5    5.05    8.95
  -3  10   5   19.46    9.36
   2 -10  -5    2.15    8.11
  -2 -10   5    5.89    6.48
  -2 -10   5    7.47    7.75
   2 -10  -5   14.97    7.73
   2  10  -5    3.02    8.03
  -2  10   5   11.62   10.00
  -2  10   5    8.37    8.05
  -1 -10   5  147.37   16.78
   1 -10  -5  133.80   17.48
  -1 -10   5  167.50   18.61
   1 -10  -5  144.68   15.82
   1  10  -5  179.32   19.37
  -1  10   5  211.15   21.59
  -1  10   5  185.16   20.30
   0 -10   5   60.43   10.91
   0 -10  -5   71.60   13.60
   0 -10  -5   63.89    9.37
   0  10  -5   79.51   13.11
   0  10   5   78.32   13.73
   0  10   5   66.00   13.21
   1 -10   5   39.71   10.42
  -1 -10  -5   60.64   12.85
  -1 -10  -5   37.01    7.17
   1  10   5   37.52   11.70
   1  10   5   48.71   11.85
  -1  10  -5   42.86   10.94
  -2 -10  -5   90.21   15.37
  -2 -10  -5   98.65    9.69
   2 -10   5   69.35   12.63
  -2  10  -5   79.57   14.17
   2  10   5   69.39   14.13
   3 -10   5   63.90   12.98
  -3 -10  -5   76.20   14.74
   3  10   5   80.25   15.49
  -3  10  -5   80.24   14.04
  -4 -10  -5   76.27   15.23
  -4 -10  -5  134.12   18.12
  -4  10  -5   78.11   15.18
   4  10   5   88.98   15.77
  -5 -10  -5   -9.62    9.98
  -5 -10  -5  -23.98    8.78
   5  10   5   -8.23   10.25
  -5  10  -5   -9.91    9.09
  -6 -10  -5   17.27   12.21
  -6 -10  -5    9.60   12.67
  -6  10  -5   21.14   13.34
   6  10   5   54.54   15.22
  -7 -10  -5   39.34   15.12
  -7 -10  -5   75.57   17.41
   7  10   5   55.18   16.26
  -7  10  -5   43.90   15.80
  -8 -10  -5   15.81   14.39
  -8  10  -5  -18.01   12.22
   8  10   5   12.12   14.53
   9 -11  -5   31.56   15.14
  -9  11   5   67.70   20.17
   9  11  -5   40.27   16.90
   8 -11  -5    1.76   13.19
  -8  11   5   24.21   14.66
   8  11  -5  -14.71   11.27
   7 -11  -5    9.92   13.03
   7  11  -5    8.43   12.01
  -7  11   5    3.27   12.58
   6 -11  -5  190.58   24.80
  -6  11   5  233.61   27.54
   6  11  -5  250.83   27.23
   5 -11  -5   80.09   16.13
   5  11  -5   97.36   16.92
  -5  11   5   98.96   18.69
   4 -11  -5   74.15   14.77
   4  11  -5   89.18   16.33
  -4  11   5   79.10   16.70
   3 -11  -5   23.92   10.93
  -3 -11   5   52.95   11.29
  -3  11   5   45.61   12.90
   3  11  -5   38.86   12.37
   2 -11  -5  207.60   23.50
  -2 -11   5  189.08   20.57
  -2 -11   5  228.12   23.21
   2 -11  -5  194.11   19.45
  -2  11   5  201.33   23.00
   2  11  -5  194.34   21.82
  -1 -11   5   -6.35    6.12
  -1 -11   5   -1.99    8.26
   1 -11  -5    5.62    8.67
   1 -11  -5    2.76    5.89
   1  11  -5   -3.17    9.26
  -1  11   5    6.79    9.82
   0 -11   5   41.29   10.42
   0 -11  -5   38.12    7.80
   0 -11  -5   33.89   11.60
   0  11   5   36.14   11.78
   0  11  -5   29.60   10.81
  -1 -11  -5  158.55   14.30
   1 -11   5  157.63   17.84
  -1 -11  -5  149.36   19.41
  -1  11  -5  133.49   17.62
   1  11   5  165.43   21.14
  -2 -11  -5   54.88   14.14
   2 -11   5   85.07   14.04
   2  11   5   84.76   15.25
  -2  11  -5   70.97   13.83
  -3 -11  -5    6.07   10.73
  -3  11  -5   -1.70   10.17
   3  11   5   16.96   10.94
  -4 -11  -5   78.15   16.12
   4  11   5   69.81   15.86
  -4  11  -5   63.05   14.93
  -5 -11  -5   54.46   15.53
  -5  11  -5   39.47   14.27
   5  11   5   48.69   14.54
  -6 -11  -5    4.62   12.55
  -6 -11  -5   -1.42   11.52
   6  11   5    4.25   11.50
  -6  11  -5   -3.96   11.73
  -7 -11  -5    5.94   13.25
   7  11   5   20.53   14.41
  -7  11  -5   12.98   14.10
  -8 -11  -5   32.15   16.37
   8  11   5   28.59   16.68
  -8  11  -5   22.51   15.83
   8 -12  -5   21.06   15.13
  -8  12   5   -2.79   13.45
   8  12  -5   -3.04   12.98
   7 -12  -5   23.41   14.64
   7  12  -5   14.46   13.11
  -7  12   5    9.55   14.85
   6 -12  -5   -3.14   11.12
   6  12  -5    2.36   11.35
  -6  12   5  -16.75   13.16
   5 -12  -5   32.26   14.10
  -5  12   5  -11.17   12.29
   5  12  -5   22.75   12.37
   4 -12  -5   10.32   11.39
   4  12  -5   11.39   11.04
  -4  12   5   -4.89   10.99
   3 -12  -5  102.29   14.94
   3 -12  -5   85.96   16.24
  -3  12   5  103.70   17.39
   3  12  -5  126.98   17.88
   2 -12  -5    2.86    6.56
   2 -12  -5    2.00   10.15
   2  12  -5  -11.10    8.95
  -2  12   5    5.03   11.15
   1 -12  -5   -4.36    5.96
   1 -12  -5    7.53    9.84
   1  12  -5    5.65    9.58
  -1  12   5   -4.80    8.79
   0 -12  -5   -5.89    9.03
   0 -12  -5    0.16    5.21
   0  12   5    3.36   10.15
   0  12  -5  -12.05    8.66
  -1 -12  -5   60.64   14.58
   1  12   5   61.47   14.71
  -1  12  -5   89.20   14.92
  -2 -12  -5  -10.18    9.88
  -2  12  -5   -2.55    9.44
   2  12   5   26.56   12.14
  -3 -12  -5    3.40   11.24
  -3  12  -5   -4.37   10.56
   3  12   5    0.14   11.14
  -4 -12  -5   -3.48   10.87
  -4  12  -5    0.45   12.00
   4  12   5   12.73   11.93
  -5 -12  -5   12.04   12.91
  -5  12  -5   26.49   13.79
   5  12   5   22.87   13.28
  -6 -12  -5    5.74   12.29
  -6  12  -5  -22.65   10.98
   6  12   5    4.56   12.25
  -7 -12  -5   13.28   14.31
  -7  12  -5    5.46   13.63
   7  12   5   12.67   14.31
   8 -13  -5   -5.50   14.26
   8  13  -5    1.05   13.90
  -8  13   5    0.49   14.77
   7 -13  -5   52.53   17.62
   7  13  -5   66.16   17.77
  -7  13   5   56.52   19.30
   6 -13  -5  224.58   28.07
   6  13  -5  167.91   24.89
  -6  13   5  197.58   28.70
   5 -13  -5   41.21   15.18
  -5  13   5   59.02   17.12
   5  13  -5   20.32   13.81
   4 -13  -5    1.44   12.27
   4  13  -5    1.30   11.50
  -4  13   5    3.27   12.00
   3 -13  -5  270.69   27.83
   3 -13  -5  187.62   21.55
  -3  13   5  237.13   27.24
   3  13  -5  153.89   22.87
   2 -13  -5   63.57   15.20
   2 -13  -5   71.77   11.80
  -2  13   5   57.13   14.92
   2  13  -5   57.73   14.81
   1 -13  -5    1.37    6.31
   1 -13  -5   28.27   12.94
  -1  13   5    1.60   10.80
   1  13  -5    0.61   10.71
   0 -13  -5  286.18   30.26
   0  13  -5  289.74   29.17
   0  13   5  311.24   32.19
  -1  13  -5  162.32   21.22
   1  13   5  130.92   20.48
  -2 -13  -5   16.23   12.56
  -2  13  -5   -0.27   11.22
   2  13   5   28.77   12.83
  -3 -13  -5   -6.46   11.06
   3  13   5    7.13   11.38
  -3  13  -5    3.22   10.92
  -4 -13  -5   60.14   16.15
   4  13   5   59.95   17.17
  -4  13  -5   44.45   15.66
  -5 -13  -5   44.44   16.54
  -5  13  -5   25.76   14.81
   5  13   5   70.09   18.20
  -6 -13  -5   24.36   14.88
  -6  13  -5    5.90   13.37
   6  13   5    8.94   13.83
  -7 -13  -5    5.00   13.62
   7  13   5   -2.20   13.86
  -7  13  -5   -3.74   13.40
   7 -14  -5   83.02   21.06
  -7  14   5   68.96   20.04
   7  14  -5   43.75   16.79
   6 -14  -5   36.64   17.00
  -6  14   5   47.43   17.50
   6  14  -5   32.36   16.39
   5 -14  -5  290.97   33.18
  -5  14   5  220.73   30.36
   5  14  -5  228.12   28.42
   4 -14  -5  104.57   20.53
  -4  14   5   89.87   20.07
   4  14  -5  102.10   19.21
   3 -14  -5    1.05    8.62
   3 -14  -5    8.31   11.67
   3  14  -5    3.98   11.94
  -3  14   5   -1.55   12.77
   2 -14  -5   12.55   12.42
   2 -14  -5   12.10    7.82
   2  14  -5   19.32   12.40
  -2  14   5    6.65   11.73
   1 -14  -5  137.49   20.58
   1 -14  -5  142.54   16.03
   1  14  -5  115.99   20.06
  -1  14   5  181.36   24.02
   0 -14  -5   26.23   12.99
   0  14   5    5.25   11.78
   0  14  -5   22.87   12.18
  -1 -14  -5  -14.36    9.80
   1  14   5    2.45   11.70
  -1  14  -5    0.31   11.25
  -2 -14  -5   30.25   13.88
  -2  14  -5   28.17   13.34
   2  14   5   17.59   13.75
  -3 -14  -5   35.55   15.53
   3  14   5   34.23   15.27
  -3  14  -5   61.13   15.82
  -4 -14  -5   50.93   16.15
  -4  14  -5   10.31   13.26
   4  14   5   27.84   14.96
  -5 -14  -5   -2.53   13.18
  -5  14  -5   -4.61   11.60
   5  14   5  -15.07   12.38
  -6 -14  -5  131.66   23.86
  -6  14  -5  104.55   21.35
   6  14   5  137.24   24.90
   6 -15  -5  -14.39   13.89
  -6  15   5  -32.51   14.30
   6  15  -5  -12.60   13.80
   5 -15  -5   10.62   15.51
  -5  15   5    7.60   15.54
   5  15  -5   -2.13   13.66
   4 -15  -5    0.25   14.26
   4 -15  -5   14.55   10.34
   4  15  -5    1.87   12.56
  -4  15   5   24.40   15.32
   3 -15  -5   -8.03   12.20
   3 -15  -5   -0.40    7.72
  -3  15   5   22.95   14.46
   3  15  -5   -3.09   12.89
   2 -15  -5   13.49   12.58
   2 -15  -5   -0.39    6.93
   2  15  -5   -1.28   11.79
  -2  15   5    9.70   13.67
   1 -15  -5   37.29   14.57
  -1  15   5   36.41   15.27
   1  15  -5   44.39   15.92
   0 -15  -5   46.66   15.65
   0  15   5   20.11   13.83
   0  15  -5   19.62   13.69
  -1 -15  -5    6.30   12.20
  -1  15  -5   23.14   13.02
   1  15   5    1.04   11.84
  -2 -15  -5    9.58   12.90
  -2  15  -5   27.38   13.18
   2  15   5   14.80   14.05
  -3 -15  -5   37.04   16.52
  -3  15  -5   31.83   14.14
   3  15   5   27.92   14.65
  -4 -15  -5   -3.12   13.65
   4  15   5    3.88   13.45
  -4  15  -5   -5.39   13.16
  -5 -15  -5   86.85   20.53
  -5  15  -5   57.25   17.32
   5  15   5   92.35   21.52
   5 -16  -5  138.05   24.73
   5  16  -5  147.51   25.01
  -5  16   5  127.82   25.75
   4 -16  -5   88.85   21.98
   4 -16  -5  101.71   16.76
   4  16  -5  107.09   21.14
  -4  16   5   78.02   20.95
   3 -16  -5   10.69   13.95
  -3  16   5    7.23   14.06
   3  16  -5  -12.37   12.19
   2 -16  -5   22.93   14.79
  -2  16   5  -10.26   12.39
   2  16  -5   18.59   15.48
   1 -16  -5   13.58   14.20
  -1  16   5    6.85   14.32
   1  16  -5   32.29   15.39
   0 -16  -5  115.52   21.21
   0  16   5  131.36   23.04
   0  16  -5   98.75   19.89
  -1 -16  -5   52.30   16.26
   1  16   5   66.17   18.57
  -1  16  -5   22.94   14.35
  -2 -16  -5   45.38   16.07
  -2  16  -5   81.06   17.82
   2  16   5   54.59   18.26
  -3 -16  -5   66.55   19.04
  -3  16  -5   89.62   18.77
   3  16   5   81.94   19.93
  -4 -16  -5   64.50   19.38
  -4  16  -5   55.31   18.35
   4  16   5   25.45   16.61
   4 -17  -5   -7.06   13.82
  -4  17   5  -21.97   14.35
   4  17  -5   18.34   15.72
   3 -17  -5   75.12   21.70
   3  17  -5   60.14   19.68
  -3  17   5   79.85   19.69
   2 -17  -5   70.69   19.98
   2  17  -5   73.02   19.75
  -2  17   5  112.83   21.51
   1 -17  -5   25.17   16.15
   1  17  -5    1.13   12.77
  -1  17   5   24.70   15.67
   0 -17  -5  -10.68   12.39
   0  17   5   -8.96   13.31
   0  17  -5  -22.41   11.54
  -1 -17  -5  128.64   24.35
   1  17   5  152.04   26.53
  -1  17  -5  120.10   21.08
  -2 -17  -5   55.53   18.53
   2  17   5   65.72   20.02
  -2  17  -5   61.68   18.04
  -3 -17  -5    5.30   14.32
  -3  17  -5    5.66   13.85
   3  17   5    2.66   14.37
  11   0  -6   30.33   15.53
  11   0  -6   52.45   14.99
  10   0  -6  199.95   25.95
  10   0  -6  203.63   24.44
   9   0  -6   17.90   12.10
   9   0  -6  -11.23    9.31
  -8   0   6  144.89   19.04
   8   0  -6  149.88   19.59
   8   0  -6  142.12   17.85
  -7   0   6   31.69   10.13
   7   0  -6   34.47   10.68
   7   0  -6   39.29   10.22
  -6   0   6  288.61   23.52
   6   0  -6  282.52   23.45
   6   0  -6  257.45   23.34
   5   0  -6  349.47   26.87
   5   0  -6  330.26   25.78
  -5   0   6  339.60   25.31
   4   0  -6  662.71   46.09
  -4   0   6  691.01   44.79
   4   0  -6  710.36   45.34
   3   0  -6  252.89   17.96
  -3   0   6  253.12   17.71
   3   0  -6  230.45   18.15
   3   0  -6  239.85   20.97
   2   0  -6  135.97   10.72
   2   0  -6  126.27   13.72
   2   0  -6  118.98   10.57
   2   0  -6  151.07   13.73
   1   0  -6   19.01    3.41
   1   0  -6    8.09    7.07
   1   0  -6   33.25    8.22
   1   0  -6   19.55    3.34
   0   0  -6    0.88    3.04
   0   0  -6   -4.07    2.86
   0   0  -6   -1.13    5.96
   0   0  -6    5.15    6.89
   0   0   6   -1.26    1.92
   1   0   6  218.88   15.26
  -1   0  -6  217.67   15.57
   1   0   6  221.62   16.38
  -1   0  -6  207.91   15.73
   2   0   6  255.53   20.05
   2   0   6  241.11   18.67
  -2   0  -6  271.68   19.43
   3   0   6   39.15    7.55
   3   0   6   45.45    7.79
  -3   0  -6   51.31    8.95
   4   0   6  176.86   17.83
  -4   0  -6  216.27   19.27
  -5   0  -6   84.47   13.76
   5   0   6  155.99   16.18
  -6   0  -6   95.94   15.24
   6   0   6  127.81   16.21
  -7   0  -6   50.24   12.94
   7   0   6   53.43   13.40
   8   0   6   60.70   15.25
  -8   0  -6   54.35   14.85
  -9   0  -6   60.98   16.33
 -10   0  -6   38.60   16.14
  11  -1  -6   19.20   14.61
  11  -1  -6   57.11   17.31
  11   1  -6   43.49   16.75
  11   1  -6   47.48   14.97
  10  -1  -6   32.19   13.60
  10  -1  -6   24.53   13.58
  10   1  -6   46.71   15.25
  10   1  -6   22.93   11.95
   9  -1  -6  134.46   20.67
   9  -1  -6  185.69   21.71
   9   1  -6  184.17   23.23
   9   1  -6  168.38   19.70
   8  -1  -6   19.38   10.81
  -8  -1   6    0.09    8.99
   8  -1  -6    0.93    8.90
   8   1  -6   15.55    9.52
  -8   1   6    0.74   10.05
   8   1  -6   -6.03    8.79
  -7  -1   6   78.83   13.09
   7  -1  -6   91.82   14.25
  -7  -1   6  102.64   13.42
   7  -1  -6   70.64   13.94
   7   1  -6   76.06   13.76
   7   1  -6  106.12   14.40
  -7   1   6   77.86   13.54
  -6  -1   6   50.10   10.05
   6  -1  -6   53.20   11.01
   6  -1  -6   40.43   10.29
   6   1  -6   39.49    9.89
   6   1  -6   28.02    9.33
  -6   1   6   36.09    9.33
   5  -1  -6  641.85   43.39
   5  -1  -6  648.31   43.78
  -5  -1   6  627.73   42.38
   5   1  -6  649.68   43.38
  -5   1   6  590.70   42.38
   5   1  -6  662.86   43.33
   4  -1  -6  102.09   11.35
  -4  -1   6   89.63   10.31
   4  -1  -6   76.26   11.93
   4   1  -6   91.79   11.09
   4   1  -6   87.83   11.84
  -4   1   6  112.45   11.35
   3  -1  -6    1.33    4.94
   3  -1  -6    2.80    5.23
  -3  -1   6    8.11    4.06
   3  -1  -6   16.48    7.83
   3   1  -6   12.93    5.02
   3   1  -6   -3.35    4.22
  -3   1   6    5.35    4.69
   3   1  -6    5.40    7.28
   2  -1  -6   51.56    6.47
   2  -1  -6   42.42    8.61
   2  -1  -6   36.37    6.15
   2   1  -6   46.13    9.69
   2   1  -6   39.02    7.62
  -2   1   6   48.45    5.81
   2   1  -6   48.13    5.49
   2   1  -6   47.71    5.50
   1  -1  -6   11.61    7.36
   1  -1  -6    2.37    7.00
   1  -1  -6    1.09    3.36
   1  -1  -6    9.18    3.60
   1   1  -6   12.41    6.79
   1   1  -6   12.84    7.65
   0  -1  -6   21.78    4.40
   0  -1  -6   20.88    4.46
   0  -1  -6   11.99    7.50
   0  -1  -6    5.49    6.87
   0   1  -6   22.27    2.99
   0   1  -6   15.28    3.13
   0   1  -6   16.30    7.10
   0   1   6   16.79    3.60
   0   1   6   13.58    3.52
   1  -1   6  106.21    9.34
  -1  -1  -6  104.11   13.91
  -1  -1  -6  133.11   10.97
  -1  -1  -6  109.64   12.96
   1  -1   6  123.66   10.25
  -1  -1  -6  113.40   10.63
   1   1   6  103.80   10.43
  -1   1  -6  135.26   10.64
  -1   1  -6  116.58    9.80
   1   1   6  119.93   10.42
   2  -1   6   44.22    7.08
  -2  -1  -6   64.81    8.71
   2  -1   6   61.84    7.81
  -2  -1  -6   66.79    8.61
  -2   1  -6   56.99    7.74
  -2   1  -6   53.42    8.45
   2   1   6   68.23    8.27
   2   1   6   56.84    7.61
   3  -1   6    8.07    5.98
  -3  -1  -6   14.59    6.73
   3   1   6    9.00    6.09
   3   1   6   16.38    6.70
  -3   1  -6   10.23    7.32
   4  -1   6   36.14    8.79
  -4  -1  -6   56.40    9.96
   4   1   6   27.47    8.06
  -4   1  -6   46.38    9.76
   4   1   6   53.15    9.95
  -5  -1  -6    0.32    7.59
   5  -1   6   -1.81    7.46
   5   1   6    2.20    7.48
  -5   1  -6   10.19    8.44
   5   1   6   -2.35    6.16
  -6  -1  -6   47.98   12.00
   6  -1   6   58.24   12.56
   6   1   6   68.76   12.76
  -6   1  -6   68.50   13.92
  -7  -1  -6   -2.63    9.42
   7  -1   6    4.27    9.71
  -7   1  -6  -14.30    8.66
   7   1   6    2.27   10.06
  -8  -1  -6    5.31   11.10
   8   1   6    4.29   10.91
  -8   1  -6   11.75   11.92
  -9  -1  -6    5.64   12.25
  -9   1  -6  -14.68   11.72
 -10  -1  -6    0.03   12.98
 -10   1  -6    8.11   13.24
  11  -2  -6   22.87   15.20
  11   2  -6  -19.04   12.17
  11   2  -6  -10.30   11.03
  10  -2  -6   -6.65   12.23
  10   2  -6    1.98   10.07
  10   2  -6   17.13   13.18
   9  -2  -6  113.59   19.17
   9   2  -6  136.65   17.82
   9   2  -6  157.75   21.18
   8  -2  -6   92.90   16.04
   8   2  -6   65.31   12.96
   8   2  -6   58.80   14.17
  -8   2   6   76.44   14.50
   7  -2  -6   90.04   14.38
   7  -2  -6   48.23   11.87
  -7  -2   6   40.88    9.29
  -7  -2   6   64.23   12.06
   7   2  -6   54.49   12.04
   7   2  -6   44.76   11.05
  -7   2   6   48.37   11.10
  -6  -2   6  152.34   16.70
   6  -2  -6  155.35   18.84
   6  -2  -6  167.44   18.36
  -6  -2   6  181.94   16.93
   6   2  -6  175.83   17.63
  -6   2   6  159.87   17.54
   6   2  -6  172.59   18.47
  -5  -2   6   78.00   10.10
   5  -2  -6   80.33   11.27
  -5  -2   6   61.00    9.07
   5  -2  -6   95.29   13.45
   5   2  -6   81.12   11.87
   5   2  -6   73.67   11.03
  -5   2   6   71.49   10.81
   4  -2  -6   -0.10    7.90
  -4  -2   6   12.06    5.15
   4  -2  -6    9.13    6.28
  -4  -2   6    4.70    4.80
   4   2  -6   14.23    7.63
   4   2  -6    1.41    5.67
  -4   2   6    2.55    5.63
   3  -2  -6 1078.18   67.70
  -3  -2   6 1057.80   65.31
   3  -2  -6 1030.41   66.41
  -3   2   6  995.75   65.94
   3   2  -6 1053.92   66.87
   3   2  -6 1091.03   65.81
   3   2  -6 1081.41   65.83
   2  -2  -6  103.36   13.13
   2  -2  -6  103.37   10.39
   2  -2  -6  106.47   10.31
   2   2  -6  115.32   10.94
   2   2  -6  100.23    9.03
  -2   2   6  109.89    9.85
   2   2  -6  102.29   12.57
   2   2  -6  103.80    9.18
   1  -2  -6  253.54   16.55
   1  -2  -6  205.53   19.93
   1  -2  -6  217.20   16.30
   1  -2  -6  222.81   19.13
   1   2  -6  215.28   19.32
  -1   2   6  222.79   15.93
   0  -2  -6  359.82   25.98
   0  -2  -6  368.43   28.56
   0  -2   6  348.57   23.96
   0  -2  -6  336.17   24.03
   0  -2  -6  357.07   24.33
   0   2  -6  358.58   22.66
   0   2   6  355.96   23.99
   0   2  -6  355.09   26.29
   0   2  -6  387.20   22.84
   0   2   6  370.67   25.67
  -1  -2  -6    0.61    4.60
  -1  -2  -6    2.11    7.90
  -1  -2  -6    2.39    4.90
  -1  -2  -6    1.52    6.70
   1  -2   6    3.25    3.56
  -1   2  -6   -5.76    4.17
   1   2   6   -1.44    4.44
   1   2   6    3.75    4.72
  -1   2  -6    2.21    3.65
   2  -2   6  157.15   12.79
  -2  -2  -6  168.04   17.80
  -2  -2  -6  156.55   14.04
  -2   2  -6  131.07   12.97
   2   2   6  152.84   13.56
  -2   2  -6  148.64   12.88
   2   2   6  127.44   13.52
  -3  -2  -6   -1.73    6.09
   3  -2   6   -4.09    4.88
  -3  -2  -6    9.61    6.41
   3   2   6   -4.39    5.38
  -3   2  -6   -1.95    6.41
   3   2   6   -4.11    5.66
  -4  -2  -6   41.77    9.55
   4  -2   6   51.80    9.40
  -4  -2  -6   34.26    9.12
  -4   2  -6   44.77    9.38
   4   2   6   53.77    9.87
   4   2   6   44.67    9.03
  -5  -2  -6  314.12   26.09
   5  -2   6  295.26   25.34
  -5   2  -6  300.88   26.89
   5   2   6  347.20   27.74
   5   2   6  301.03   26.08
   6  -2   6   10.59    8.88
  -6  -2  -6   -6.53    7.89
  -6   2  -6    1.27    8.82
   6   2   6   -0.33    8.01
   6   2   6   13.96    9.40
  -7  -2  -6   33.39   11.79
   7  -2   6   38.26   12.52
   7   2   6   -0.70    9.62
  -7   2  -6   31.23   12.22
  -8  -2  -6   70.52   16.10
  -8   2  -6   67.05   15.67
   8   2   6   38.80   14.48
  -9  -2  -6   32.84   13.81
  -9   2  -6   23.44   14.25
 -10  -2  -6   12.13   13.48
 -10  -2  -6    6.39   13.09
 -10   2  -6   18.56   14.68
  11  -3  -6   53.92   17.85
  11   3  -6  127.74   22.76
  10  -3  -6   71.90   16.47
  10   3  -6   55.08   16.48
  10   3  -6   39.03   13.54
   9  -3  -6    4.78   11.83
   9   3  -6   36.30   11.00
   9   3  -6   18.36   12.78
   8  -3  -6  509.37   40.39
  -8   3   6  504.65   39.63
   8   3  -6  517.64   37.48
   8   3  -6  515.37   40.81
   7  -3  -6  175.01   20.88
  -7  -3   6  204.07   20.94
  -7  -3   6  192.20   20.00
  -7  -3   6  194.01   20.08
   7   3  -6  209.44   20.17
  -7   3   6  210.94   21.48
   7   3  -6  187.37   21.28
   6  -3  -6   -3.22    7.17
  -6  -3   6    0.20    5.28
  -6  -3   6    2.58    6.56
  -6  -3   6    0.91    6.33
   6  -3  -6    0.69    7.71
   6   3  -6   12.03    8.43
   6   3  -6   -2.51    6.88
  -6   3   6    1.69    7.34
   5  -3  -6   63.49   12.36
   5  -3  -6   54.32   10.59
  -5  -3   6   67.85    9.69
  -5  -3   6   63.78    9.41
  -5  -3   6   56.13    9.23
   5   3  -6   47.60    9.97
  -5   3   6   60.55   10.15
   5   3  -6   42.75    9.81
  -4  -3   6   46.13    7.26
   4  -3  -6   45.88   11.25
  -4  -3   6   42.34    7.14
   4  -3  -6   48.16    9.02
   4   3  -6   33.13    7.94
  -4   3   6   42.02    8.17
   4   3  -6   44.25    9.02
   3  -3  -6  142.25   15.40
  -3  -3   6  144.20   12.83
   3  -3  -6  135.49   13.63
  -3  -3   6  141.27   11.99
  -3   3   6  155.75   13.53
   3   3  -6  139.81   14.69
   3   3  -6  132.05   12.46
   3   3  -6  138.82   12.50
  -2  -3   6   -1.43    3.12
   2  -3  -6   -5.70    6.79
   2  -3  -6   -3.67    5.00
  -2  -3   6   -2.81    3.19
   2   3  -6    3.75    4.24
   2   3  -6    1.59    3.50
   2   3  -6    4.20    7.09
  -2   3   6    0.26    4.79
   2   3  -6    1.08    4.44
   1  -3  -6  572.28   36.60
  -1  -3   6  530.96   37.10
   1  -3  -6  576.74   40.91
   1   3  -6  562.10   34.99
   1   3  -6  570.06   34.79
  -1   3   6  552.42   36.17
   1   3  -6  558.51   37.83
   0  -3  -6  645.12   40.43
   0  -3  -6  613.55   45.06
   0  -3   6  599.39   41.47
   0  -3  -6  579.76   41.13
   0   3  -6  634.65   38.95
   0   3   6  673.20   43.10
   0   3   6  614.95   40.17
   0   3  -6  612.51   38.73
   1  -3   6   64.18    6.50
  -1  -3  -6   44.16    8.61
  -1  -3  -6   40.42    7.96
  -1  -3  -6   49.14   10.92
  -1   3  -6   58.74    7.10
   1   3   6   60.52    8.62
   1   3   6   68.84    8.69
  -1   3  -6   65.95    7.51
  -2  -3  -6  195.78   16.78
  -2  -3  -6  183.38   19.88
   2  -3   6  191.38   14.75
  -2   3  -6  177.12   16.07
   2   3   6  200.84   17.31
   2   3   6  188.83   16.22
   3  -3   6  783.63   51.31
  -3  -3  -6  736.13   56.42
  -3  -3  -6  829.51   52.59
   3   3   6  762.73   52.25
   3   3   6  831.47   56.05
  -3   3  -6  825.79   52.28
  -4  -3  -6  375.28   29.08
   4  -3   6  378.18   27.87
   4   3   6  345.64   28.70
  -4   3  -6  396.29   28.88
   4   3   6  388.63   30.45
  -5  -3  -6    7.80    8.39
  -5  -3  -6    5.00    8.13
   5  -3   6   -3.32    7.10
  -5   3  -6    1.80    8.13
   5   3   6    0.71    7.42
   5   3   6   -8.88    7.49
  -6  -3  -6  164.26   20.07
  -6  -3  -6  164.04   20.33
   6  -3   6  223.24   21.24
  -6   3  -6  175.57   21.11
   6   3   6  243.90   23.47
   6   3   6  181.61   20.32
  -7  -3  -6   22.11   11.17
   7  -3   6   19.04   10.51
  -7  -3  -6   24.10   11.73
  -7   3  -6   26.47   12.53
   7   3   6   19.63   11.53
  -8  -3  -6    3.69   10.74
  -8  -3  -6   26.95   13.28
  -8   3  -6   12.33   12.63
   8   3   6   16.06   11.77
  -9  -3  -6   29.53   14.92
  -9  -3  -6   47.89   15.56
  -9   3  -6   30.74   15.12
 -10  -3  -6   51.90   17.04
 -10  -3  -6   71.05   18.04
 -10   3  -6   92.16   20.99
  11  -4  -6   16.33   14.45
  11   4  -6   23.12   15.90
  10  -4  -6   36.14   15.79
  10   4  -6    8.45   13.38
   9  -4  -6  -13.75   10.86
   9   4  -6   -7.09    8.43
   9   4  -6   11.35   11.45
   8  -4  -6   -1.71   10.44
  -8   4   6   13.51   10.55
   8   4  -6   -0.33   10.17
   8   4  -6    9.66    8.75
  -7  -4   6   91.39   14.04
  -7  -4   6   95.90   14.19
   7  -4  -6   75.72   14.79
   7   4  -6   98.29   13.63
  -7   4   6  129.10   16.54
   7   4  -6  112.00   16.25
   6  -4  -6   52.43   11.37
  -6  -4   6   52.78   10.12
  -6  -4   6   43.21    8.79
   6   4  -6   76.80   11.29
  -6   4   6   65.88   11.78
   6   4  -6   56.12   11.50
  -5  -4   6    8.92    5.75
   5  -4  -6   19.69    9.61
   5  -4  -6   16.18    8.00
  -5  -4   6   19.54    6.63
   5   4  -6   12.75    7.62
   5   4  -6    5.61    6.73
  -5   4   6   -4.09    6.45
  -4  -4   6   65.02    8.79
  -4  -4   6   57.46    8.76
   4  -4  -6   46.66   11.35
   4  -4  -6   61.34   10.21
   4   4  -6   58.99    9.54
  -4   4   6   58.83    9.44
   4   4  -6   56.75    9.77
   3  -4  -6    5.08    7.79
  -3  -4   6   -0.80    4.23
   3  -4  -6    0.54    5.93
  -3  -4   6    8.69    4.83
   3   4  -6    2.18    5.27
   3   4  -6    4.10    6.54
   3   4  -6    0.92    4.52
  -3   4   6   -1.36    5.63
  -2  -4   6  144.54   12.54
   2  -4  -6  136.16   14.48
  -2  -4   6  148.25   11.43
   2  -4  -6  137.06   13.64
   2   4  -6  141.77   11.86
   2   4  -6  140.98   14.09
  -2   4   6  183.63   14.61
   2   4  -6  125.75   12.26
  -1  -4   6  104.19    9.37
   1  -4  -6  108.63   11.17
   1  -4  -6  109.18   12.58
  -1  -4   6   91.81    8.46
   1   4  -6  107.76   12.39
  -1   4   6  105.98   10.90
   1   4  -6  102.13    8.96
  -1   4   6   92.35   10.61
   1   4  -6   86.02    9.10
   0  -4  -6   71.38    9.39
   0  -4  -6   65.45   11.83
   0  -4   6   55.20    6.92
   0  -4  -6   52.73    9.43
   0  -4   6   80.92    6.84
   0   4  -6   66.74    7.39
   0   4   6   43.70    7.90
   0   4  -6   56.90    6.81
   0   4   6   68.76    9.05
   1  -4   6   42.22    6.10
  -1  -4  -6   24.20    9.02
  -1  -4  -6   54.47    8.77
  -1  -4  -6   40.06    7.85
   1   4   6   39.37    7.63
  -1   4  -6   52.73    6.77
  -1   4  -6   47.21    7.42
   1   4   6   50.02    8.25
  -2  -4  -6   33.06   10.57
   2  -4   6   61.51    8.02
  -2  -4  -6   52.37    8.80
  -2  -4  -6   56.16    9.07
  -2   4  -6   44.07    8.20
   2   4   6   65.49   10.14
   2   4   6   57.96    9.03
   3  -4   6   86.14   10.70
  -3  -4  -6   91.30   14.42
  -3  -4  -6  127.87   13.90
  -3   4  -6  110.70   12.65
   3   4   6   77.06   11.03
   3   4   6   86.57   11.86
  -4  -4  -6    2.64    8.14
  -4  -4  -6    3.10    7.62
   4  -4   6    2.41    5.69
   4   4   6   -1.36    7.43
   4   4   6   12.86    7.43
  -4   4  -6    5.36    7.80
   5  -4   6   38.77    9.73
  -5  -4  -6   43.38   11.26
   5   4   6   82.52   12.88
   5   4   6   51.59   10.79
  -5   4  -6   35.05   11.03
   6  -4   6   58.59   12.07
  -6  -4  -6   58.45   13.38
  -6   4  -6   48.79   12.84
   6   4   6   45.86   12.71
   6   4   6   39.40   11.51
  -7  -4  -6   21.59   12.73
   7   4   6   37.54   13.19
  -7   4  -6   62.23   15.07
  -8  -4  -6   42.89   15.07
  -8  -4  -6   71.59   16.74
   8   4   6   50.81   15.08
  -8   4  -6   21.68   14.08
  -9  -4  -6  110.15   20.90
  -9  -4  -6   92.44   19.83
  -9   4  -6  158.07   23.83
 -10  -4  -6   37.95   16.43
 -10   4  -6  -10.94   14.62
  11  -5  -6   36.08   16.00
  11   5  -6   21.90   15.75
  10  -5  -6   11.22   13.42
  10   5  -6   -7.09   11.97
   9  -5  -6   68.60   16.16
   9   5  -6   21.28   13.13
   8  -5  -6   65.98   15.32
  -8   5   6   78.85   15.87
   8   5  -6   98.45   13.54
   8   5  -6   59.05   14.49
  -7  -5   6   39.01    9.05
   7  -5  -6   34.15   12.00
   7   5  -6   12.59   10.00
  -7   5   6   23.29   10.75
   7   5  -6    8.07    7.90
   6  -5  -6    9.22    9.18
  -6  -5   6    8.38    5.85
  -6  -5   6    8.75    7.38
   6   5  -6    4.50    8.23
  -6   5   6   -8.79    8.01
   6   5  -6   -3.84    6.88
  -5  -5   6    0.54    6.45
   5  -5  -6    0.54    7.23
  -5  -5   6    8.05    5.69
   5  -5  -6    5.30    8.71
  -5   5   6   16.89    8.06
   5   5  -6    3.71    6.59
   5   5  -6   -6.10    6.90
  -4  -5   6   30.87    6.98
  -4  -5   6   32.95    6.94
   4  -5  -6   20.49    8.13
   4  -5  -6   15.47    9.16
   4   5  -6   29.32    8.11
  -4   5   6   16.99    7.51
   4   5  -6   19.35    7.30
   3  -5  -6  118.86   14.72
  -3  -5   6  115.28   11.12
   3  -5  -6  132.27   13.88
  -3  -5   6   87.54   10.85
   3   5  -6   92.75   11.34
  -3   5   6  102.44   12.44
   3   5  -6  118.19   12.45
  -2  -5   6  245.95   17.71
   2  -5  -6  250.15   20.13
   2  -5  -6  240.13   20.94
  -2  -5   6  252.28   19.48
   2   5  -6  240.95   19.88
   2   5  -6  253.41   18.22
  -2   5   6  246.81   19.74
   2   5  -6  232.40   18.66
   1  -5  -6   92.30   11.95
  -1  -5   6  103.83    9.54
   1  -5  -6   89.16   12.04
  -1  -5   6   96.50   10.32
   1   5  -6  118.29   10.39
  -1   5   6  100.22   11.54
   1   5  -6  124.61   11.20
  -1   5   6  119.64   12.63
   0  -5   6   75.13    7.63
   0  -5  -6   68.12    9.53
   0  -5  -6   38.36   10.85
   0  -5   6   57.87    7.84
   0  -5  -6   62.69    9.89
   0   5   6   63.85    9.76
   0   5  -6   87.35    9.13
   0   5  -6   77.61    7.99
   0   5   6   60.40    9.34
  -1  -5  -6   13.89    8.11
  -1  -5  -6   13.36    6.98
  -1  -5  -6   16.59    6.83
   1  -5   6   29.69    5.98
  -1   5  -6   22.05    6.65
   1   5   6   18.87    6.65
  -1   5  -6   28.40    5.77
   1   5   6   35.10    7.74
  -2  -5  -6  -16.48    6.98
  -2  -5  -6   -3.35    5.26
  -2  -5  -6   -6.82    6.02
   2  -5   6    5.80    4.82
  -2   5  -6   -3.86    5.90
   2   5   6    0.76    6.02
   2   5   6   -8.51    5.48
   3  -5   6  208.22   18.21
  -3  -5  -6  214.90   20.85
  -3  -5  -6  234.59   23.61
   3   5   6  227.21   19.90
   3   5   6  235.08   21.40
  -3   5  -6  221.33   19.80
   4  -5   6   89.09   11.83
  -4  -5  -6   47.34   12.27
  -4  -5  -6   85.05   13.18
   4   5   6   84.80   12.93
  -4   5  -6   74.20   12.47
   4   5   6   91.62   13.35
  -5  -5  -6   63.64   14.14
   5  -5   6   57.88   10.90
  -5  -5  -6   54.42   12.54
  -5   5  -6   56.67   12.73
   5   5   6   36.25   11.52
   5   5   6   56.82   11.48
  -6  -5  -6   33.06   11.61
  -6  -5  -6    9.40   11.36
   6  -5   6   43.82   11.36
  -6   5  -6   40.40   12.77
   6   5   6   52.24   13.03
  -7  -5  -6  111.52   17.73
  -7  -5  -6  137.38   19.80
  -7   5  -6   94.41   17.76
   7   5   6  105.66   17.71
  -8  -5  -6   18.25   12.12
  -8  -5  -6    7.47   12.69
   8   5   6    2.62   12.39
  -8   5  -6    2.94   12.67
  -9  -5  -6  -25.70   10.33
  -9  -5  -6   17.81   13.07
  -9   5  -6   -2.15   14.29
 -10  -5  -6   -1.77   13.31
 -10  -5  -6   -2.72   12.94
 -10   5  -6    3.48   15.61
  11  -6  -6    1.63   14.63
  11   6  -6   -4.95   13.78
  10  -6  -6   39.64   15.90
  10   6  -6   67.17   17.97
   9  -6  -6  193.31   26.03
   9   6  -6  243.02   27.23
   8  -6  -6   45.62   13.74
   8   6  -6   30.21   12.16
  -8   6   6   45.50   14.04
   7  -6  -6   58.97   13.59
  -7   6   6   60.85   14.07
   7   6  -6   60.58   10.28
   7   6  -6   46.78   12.84
  -6  -6   6  203.74   19.26
  -6  -6   6  168.59   18.53
   6  -6  -6  145.01   18.89
   6   6  -6  152.55   18.74
  -6   6   6  155.85   19.35
   6   6  -6  159.67   16.56
  -5  -6   6  229.51   19.03
  -5  -6   6  142.62   18.13
   5  -6  -6  200.80   20.99
  -5   6   6  269.62   22.62
   5   6  -6  228.21   18.42
   5   6  -6  225.83   21.19
   4  -6  -6   35.74   11.11
  -4  -6   6   30.06    7.80
   4  -6  -6   38.46    9.79
  -4  -6   6   45.03    8.11
  -4   6   6   28.76    9.63
   4   6  -6   30.81    8.52
   4   6  -6   43.17    8.50
  -3  -6   6  537.07   35.74
  -3  -6   6  523.46   38.48
   3  -6  -6  505.15   37.66
   3  -6  -6  486.28   37.51
   3   6  -6  570.13   36.85
   3   6  -6  589.02   36.40
  -3   6   6  509.54   37.44
   2  -6  -6  270.62   22.05
  -2  -6   6  263.33   19.29
  -2  -6   6  247.46   21.00
   2  -6  -6  269.42   21.84
  -2   6   6  280.70   21.83
   2   6  -6  266.11   20.71
   1  -6  -6   52.52    9.45
  -1  -6   6   51.95    6.88
  -1  -6   6   41.38    7.30
   1  -6  -6   46.46    9.17
  -1   6   6   50.04    9.24
   1   6  -6   57.00    7.72
  -1   6   6   33.91    8.06
   1   6  -6   55.69    8.67
   0  -6  -6   10.14    7.24
   0  -6  -6   19.04    6.94
   0  -6   6   18.61    5.72
   0  -6   6   27.38    5.68
   0   6   6   15.48    6.72
   0   6  -6   19.03    6.63
   0   6   6   24.99    7.56
  -1  -6  -6  450.70   35.63
  -1  -6  -6  474.71   31.11
  -1  -6  -6  435.73   32.16
   1  -6   6  465.43   30.43
   1   6   6  474.86   34.47
  -1   6  -6  419.06   31.16
   1   6   6  413.62   31.96
  -2  -6  -6  419.93   28.17
  -2  -6  -6  378.27   29.78
   2  -6   6  402.23   28.34
   2   6   6  421.11   30.43
   2   6   6  358.50   31.59
  -2   6  -6  420.46   29.61
  -3  -6  -6   10.82    8.16
  -3  -6  -6    8.46    8.61
   3  -6   6    0.28    5.50
   3   6   6    2.28    7.31
   3   6   6    8.46    7.53
  -3   6  -6    3.43    7.25
   4  -6   6  108.19   13.22
  -4  -6  -6  109.50   15.65
  -4  -6  -6   65.90   14.50
   4   6   6   86.67   14.00
   4   6   6   96.95   14.29
  -4   6  -6   95.60   13.61
   5  -6   6  248.28   22.96
  -5  -6  -6  209.79   24.27
  -5  -6  -6  236.53   24.01
   5   6   6  209.72   22.81
  -5   6  -6  186.52   22.23
   5   6   6  284.45   25.31
  -6  -6  -6  181.98   22.10
  -6  -6  -6  209.37   24.87
   6   6   6  205.15   23.11
  -6   6  -6  212.83   24.03
  -7  -6  -6    3.72   11.49
  -7  -6  -6    3.36   11.17
   7   6   6    3.26   11.32
  -7   6  -6    2.80   11.77
  -8  -6  -6  355.23   34.18
  -8  -6  -6  373.66   35.99
   8   6   6  283.68   32.67
  -8   6  -6  315.18   33.50
  -9  -6  -6   43.63   16.30
  -9  -6  -6   66.51   19.19
  -9   6  -6   90.23   20.40
  10  -7  -6   19.41   14.46
  10   7  -6   37.29   15.37
   9  -7  -6    9.03   12.71
   9   7  -6   23.68   13.09
   8  -7  -6   -0.10   12.06
   8   7  -6   45.03   13.94
  -8   7   6   30.85   13.58
   7  -7  -6    8.25   10.91
   7   7  -6   22.58   10.93
  -7   7   6   17.41   11.48
   6  -7  -6   30.56   10.77
  -6  -7   6   40.55   10.22
   6   7  -6   26.71    8.14
  -6   7   6   43.99   11.72
   6   7  -6   29.72   10.58
  -5  -7   6    2.77    7.28
   5  -7  -6   11.71    9.07
  -5  -7   6   -3.90    5.27
  -5   7   6    8.64    8.53
   5   7  -6    6.56    6.81
   5   7  -6    2.23    7.53
  -4  -7   6  396.80   29.70
   4  -7  -6  360.91   29.41
   4  -7  -6  321.18   29.18
  -4  -7   6  367.14   27.51
  -4   7   6  392.14   29.76
   4   7  -6  382.98   28.66
   4   7  -6  358.10   26.70
   3  -7  -6  127.39   15.75
  -3  -7   6  119.40   14.13
   3  -7  -6  137.43   16.31
  -3  -7   6  148.49   14.19
   3   7  -6  131.56   14.81
   3   7  -6  132.59   13.88
  -3   7   6  162.49   16.87
   2  -7  -6    0.83    7.05
  -2  -7   6    0.56    5.23
  -2  -7   6    7.30    5.27
   2  -7  -6    6.02    6.69
   2   7  -6    5.40    6.60
  -2   7   6    9.56    6.55
  -2   7   6   16.31    7.73
  -1  -7   6  425.19   30.82
   1  -7  -6  497.39   32.92
   1  -7  -6  464.33   33.53
  -1  -7   6  493.93   33.99
  -1   7   6  488.41   35.81
  -1   7   6  415.73   33.01
   1   7  -6  450.39   32.18
   0  -7  -6  194.50   19.31
   0  -7  -6  198.74   17.31
   0  -7   6  220.81   18.06
   0  -7   6  186.40   16.24
   0   7   6  204.05   19.72
   0   7  -6  198.12   17.64
   0   7   6  209.49   19.77
  -1  -7  -6  108.48   11.89
  -1  -7  -6  118.76   16.80
   1  -7   6  106.29   11.63
  -1  -7  -6   94.93   13.34
   1   7   6  108.04   13.63
   1   7   6  108.45   14.05
  -1   7  -6  113.75   12.93
  -2  -7  -6   43.99   10.30
  -2  -7  -6   21.57   10.17
  -2  -7  -6   39.89    7.48
   2  -7   6   36.62    7.94
   2   7   6   34.66    9.59
  -2   7  -6   41.51    9.44
   2   7   6   22.98    8.47
  -3  -7  -6   63.64   13.74
   3  -7   6   98.79   11.98
  -3  -7  -6   66.39   12.93
   3   7   6   46.42   11.38
   3   7   6  105.32   13.86
  -3   7  -6   92.29   13.22
  -4  -7  -6   -0.92    7.94
  -4  -7  -6   15.34   10.13
   4  -7   6    0.36    6.74
   4   7   6    4.86    8.38
  -4   7  -6    4.85    8.55
   4   7   6   11.00    7.80
  -5  -7  -6    8.85   10.28
  -5  -7  -6   10.82   10.96
   5   7   6   -3.93    9.01
  -5   7  -6    2.95    9.37
  -6  -7  -6   11.03   11.42
  -6  -7  -6   15.68   11.92
   6   7   6    9.17   10.98
  -6   7  -6    8.59   11.30
  -7  -7  -6  399.33   37.52
  -7  -7  -6  410.04   35.12
   7   7   6  323.91   34.54
  -7   7  -6  385.40   36.65
  -8  -7  -6   29.85   15.24
  -8  -7  -6   21.76   14.24
   8   7   6   21.23   13.28
  -8   7  -6   27.56   15.13
  -9  -7  -6  -26.69   13.10
  -9  -7  -6  -11.34   12.02
  -9   7  -6  -20.49   13.11
  10  -8  -6   44.59   17.79
  10   8  -6   30.13   15.34
   9  -8  -6    2.33   12.29
   9   8  -6    6.25   13.28
   8  -8  -6    2.39   11.93
  -8   8   6  -22.49    9.89
   8   8  -6   10.46   11.93
   7  -8  -6  -14.56    9.55
  -7   8   6   -4.96   11.31
   7   8  -6    5.40   10.19
   6  -8  -6   37.98   12.23
  -6  -8   6   60.81   11.71
  -6   8   6   26.60   11.77
   6   8  -6   43.23   12.00
   5  -8  -6   33.81   11.48
  -5  -8   6   16.06    7.74
   5   8  -6   26.85    9.95
  -5   8   6   42.78   12.19
   5   8  -6   24.11    7.87
  -4  -8   6   12.38    7.14
   4  -8  -6   10.91    8.20
  -4  -8   6   16.28    7.35
   4  -8  -6   18.19   10.00
  -4   8   6   20.02   10.12
   4   8  -6    4.92    8.60
   4   8  -6   11.19    6.74
  -3  -8   6  194.54   18.54
   3  -8  -6  233.17   21.55
  -3  -8   6  189.66   18.39
   3  -8  -6  194.97   20.72
  -3   8   6  163.53   19.61
   3   8  -6  191.11   19.40
  -2  -8   6   83.11   11.14
   2  -8  -6   71.70   12.35
  -2  -8   6   87.80   11.00
   2  -8  -6   81.28   12.18
  -2   8   6   94.04   13.54
  -2   8   6   98.98   13.10
   2   8  -6   81.50   12.29
  -1  -8   6    0.12    4.88
   1  -8  -6    6.25    7.35
  -1  -8   6   -0.23    5.16
   1  -8  -6    4.13    6.31
   1   8  -6   -5.65    6.44
  -1   8   6   -2.36    6.43
  -1   8   6  -11.09    6.15
   0  -8   6   46.39    8.19
   0  -8   6   38.85    8.08
   0  -8  -6   33.06    7.70
   0  -8  -6   53.25   10.23
   0   8  -6   23.24    8.33
   0   8   6   45.02   10.56
   0   8   6   23.06    8.05
  -1  -8  -6   42.92   10.65
  -1  -8  -6   55.32    8.43
   1  -8   6   44.49    8.50
   1   8   6   44.00   10.84
   1   8   6   73.22   11.99
  -1   8  -6   39.67    9.76
  -2  -8  -6    6.83    8.07
  -2  -8  -6   -2.10    8.75
   2  -8   6   12.86    7.10
  -2  -8  -6   -1.94    4.65
   2   8   6   19.46    8.16
  -2   8  -6    6.31    7.92
   2   8   6    9.73    8.14
   3  -8   6   94.68   13.13
  -3  -8  -6  110.48   16.14
  -3  -8  -6   82.14   14.32
   3   8   6   94.55   14.47
   3   8   6  119.25   16.11
  -3   8  -6   95.58   14.45
  -4  -8  -6   18.53   10.62
  -4  -8  -6   34.32   11.47
  -4   8  -6    3.49    9.20
   4   8   6   18.67   10.35
   4   8   6   25.94    9.25
  -5  -8  -6   -7.10   10.08
  -5  -8  -6    2.48    9.05
  -5   8  -6    0.29    9.36
   5   8   6   -5.15    9.67
  -6  -8  -6   -0.74   10.55
  -6  -8  -6   16.65   11.71
  -6   8  -6    6.75   10.58
   6   8   6   16.13   11.96
  -7  -8  -6    6.05   13.40
  -7  -8  -6  -12.03   10.19
   7   8   6   19.31   12.87
  -7   8  -6   -8.43   11.78
  -8  -8  -6  -11.77   13.14
  -8  -8  -6    9.92   12.83
   8   8   6   16.35   13.71
  -8   8  -6    6.28   13.25
  -9  -8  -6   54.89   18.86
  -9  -8  -6   17.77   14.93
  -9   8  -6   41.86   18.47
  10  -9  -6  -13.14   13.94
  10   9  -6   18.93   14.95
   9  -9  -6   16.08   14.00
   9   9  -6   12.71   13.79
   8  -9  -6   42.38   14.93
   8   9  -6   54.31   15.33
  -8   9   6   71.25   16.23
   7  -9  -6   45.07   13.91
  -7   9   6   16.34   12.28
   7   9  -6   16.33   11.34
   6  -9  -6   23.21   11.89
  -6   9   6   10.12   11.49
   6   9  -6   14.51   10.45
   5  -9  -6   87.68   15.75
  -5  -9   6  116.56   15.77
   5   9  -6   88.99   15.09
  -5   9   6  121.39   18.05
  -4  -9   6  189.68   21.21
   4  -9  -6  256.48   24.76
   4  -9  -6  221.54   23.05
  -4   9   6  244.36   24.08
   4   9  -6  184.51   21.70
   3  -9  -6  257.33   25.34
   3  -9  -6  216.15   22.56
  -3  -9   6  258.61   21.61
  -3  -9   6  254.87   22.36
   3   9  -6  228.41   23.02
  -3   9   6  194.07   23.08
  -3   9   6  266.44   24.43
  -2  -9   6   41.33    8.87
   2  -9  -6   33.50   10.32
  -2  -9   6   41.85    8.86
   2  -9  -6   36.98    9.49
  -2   9   6   22.34   10.03
  -2   9   6   60.41   11.67
   2   9  -6   26.05    9.55
  -1  -9   6  169.00   18.10
   1  -9  -6  181.66   20.14
   1  -9  -6  192.65   18.27
  -1  -9   6  191.28   16.79
  -1   9   6  228.04   22.23
   1   9  -6  215.12   19.72
  -1   9   6  139.11   18.17
   0  -9   6  266.27   20.61
   0  -9   6  237.80   21.71
   0  -9  -6  226.76   19.71
   0  -9  -6  262.88   24.47
   0   9  -6  246.81   22.00
   0   9   6  249.38   24.01
   0   9   6  255.81   24.02
  -1  -9  -6   79.99   13.77
  -1  -9  -6   76.04    9.90
   1  -9   6   67.15   10.72
   1   9   6   54.11   11.12
   1   9   6   75.16   13.07
  -1   9  -6   71.47   12.27
   2  -9   6   46.89   10.33
  -2  -9  -6   84.40    9.69
  -2  -9  -6   48.99   12.41
   2   9   6   65.21   13.23
   2   9   6   99.15   14.40
  -2   9  -6   93.24   13.33
  -3  -9  -6  135.29   18.25
  -3  -9  -6   60.46   13.77
   3   9   6  131.31   17.10
   3   9   6   89.62   15.09
  -3   9  -6   79.36   14.37
  -4  -9  -6   51.20   13.18
  -4  -9  -6   44.08   13.25
   4   9   6   42.24   11.68
  -4   9  -6   44.21   12.43
  -5  -9  -6   12.30   11.98
  -5  -9  -6   14.44   11.93
   5   9   6   16.07   11.12
  -5   9  -6   17.19   10.77
  -6  -9  -6  106.77   19.05
  -6  -9  -6   98.93   18.12
   6   9   6  139.40   20.10
  -6   9  -6   88.83   17.58
  -7  -9  -6   92.22   18.89
  -7  -9  -6   50.17   16.43
   7   9   6   90.54   18.36
  -7   9  -6   78.17   17.33
  -8  -9  -6   66.38   18.76
  -8  -9  -6  104.83   19.51
  -8   9  -6   76.07   18.89
   8   9   6   76.86   21.55
  -9  -9  -6   -0.39   14.59
  -9   9  -6  -12.62   13.96
   9 -10  -6   28.42   15.04
   9  10  -6   14.20   14.50
   8 -10  -6  -10.40   12.41
  -8  10   6   10.04   13.47
   8  10  -6    6.21   11.35
   7 -10  -6   32.84   13.96
  -7  10   6   40.16   14.95
   7  10  -6   37.10   13.24
   6 -10  -6   17.44   13.15
  -6  10   6   39.75   13.90
   6  10  -6   40.35   12.23
   5 -10  -6   22.66   11.57
  -5  10   6   66.14   15.09
   5  10  -6   35.49   12.20
   4 -10  -6    7.37    9.75
   4 -10  -6   13.08   10.05
  -4 -10   6    2.72    6.53
   4  10  -6   -2.54    9.38
  -4  10   6   -7.19    9.76
   3 -10  -6   99.47   15.42
   3 -10  -6  105.92   16.57
  -3 -10   6  105.32   15.07
  -3  10   6  143.51   17.93
   3  10  -6  105.87   15.65
  -3  10   6   84.74   16.16
  -2 -10   6    4.37    6.90
   2 -10  -6    1.78    8.66
   2 -10  -6   13.84    7.61
   2  10  -6   10.64    8.78
  -2  10   6   -7.27    8.18
  -2  10   6   -1.62    7.97
   1 -10  -6    3.36    6.27
  -1 -10   6   -5.47    5.88
   1 -10  -6    5.14    8.42
   1  10  -6   -0.78    8.14
  -1  10   6    4.54    7.57
  -1  10   6    6.86    9.11
   0 -10  -6   68.56    9.69
   0 -10  -6   43.03   11.50
   0  10  -6   49.23   11.54
   0  10   6   62.56   12.84
   0  10   6   73.61   13.58
  -1 -10  -6   64.96   13.62
  -1 -10  -6   69.92    9.74
   1  10   6   70.81   13.46
  -1  10  -6   63.48   12.40
   1  10   6  117.70   16.16
  -2 -10  -6  152.04   19.54
  -2 -10  -6  143.75   13.91
   2  10   6  161.50   20.06
  -2  10  -6  149.58   18.07
  -3 -10  -6    8.35   10.12
   3  10   6   25.38   11.23
  -3  10  -6   20.74   10.97
  -4 -10  -6   47.70   13.52
  -4 -10  -6   23.44   12.55
  -4  10  -6   31.68   12.50
   4  10   6   72.58   15.95
  -5 -10  -6  130.40   19.80
  -5 -10  -6  127.80   20.28
  -5  10  -6  111.91   17.39
   5  10   6   94.40   17.71
  -6 -10  -6   10.82   13.20
  -6 -10  -6    8.45   12.19
  -6  10  -6    2.70   11.21
   6  10   6   11.99   11.83
  -7 -10  -6    4.10   13.74
  -7 -10  -6  -14.66   11.29
  -7  10  -6    8.24   13.07
   7  10   6    6.18   13.47
  -8 -10  -6   17.94   13.69
  -8  10  -6  -13.48   13.01
   9 -11  -6    8.60   14.60
   9  11  -6   -7.01   12.23
   8 -11  -6  -12.85   12.29
   8  11  -6    7.33   12.50
   7 -11  -6   11.28   12.83
  -7  11   6   19.92   14.65
   7  11  -6    9.34   12.41
   6 -11  -6    0.92   11.50
  -6  11   6   -3.06   12.40
   6  11  -6   -8.23   10.50
   5 -11  -6    9.67   11.22
  -5  11   6   -3.09   11.22
   5  11  -6    4.49   10.82
   4 -11  -6   10.83   10.15
   4 -11  -6   23.55   11.86
  -4  11   6    5.72   10.06
   4  11  -6   25.84   11.92
   3 -11  -6    4.79    9.01
  -3 -11   6    3.39    7.38
   3 -11  -6    8.05    8.32
  -3  11   6    8.41   10.77
   3  11  -6  -15.81    8.09
   2 -11  -6   18.88   10.65
   2 -11  -6   13.22    8.13
  -2 -11   6   17.77    8.46
   2  11  -6   12.49    9.96
  -2  11   6   -4.16    8.81
   1 -11  -6  127.14   14.98
  -1 -11   6  124.17   16.17
   1 -11  -6  149.75   19.07
   1  11  -6  130.00   17.38
  -1  11   6  162.51   19.60
   0 -11  -6  142.54   18.36
   0 -11  -6  109.38   12.69
   0  11  -6   95.60   15.68
   0  11   6  119.08   17.92
  -1 -11  -6   45.44    7.85
  -1 -11  -6   32.28   11.69
  -1  11  -6   23.76   10.54
   1  11   6   36.72   12.18
  -2 -11  -6    0.41   10.07
   2  11   6    5.97    9.65
  -2  11  -6    4.26    9.43
  -3 -11  -6   10.76   10.84
   3  11   6   12.55   11.48
  -3  11  -6    6.78   10.72
  -4 -11  -6   64.59   15.79
   4  11   6   63.55   16.36
  -4  11  -6   46.94   13.65
  -5 -11  -6    2.66   11.67
  -5 -11  -6   -3.78   11.09
  -5  11  -6   -2.15   10.21
   5  11   6   -0.88   10.55
  -6 -11  -6   16.71   13.38
  -6 -11  -6   -4.01   12.02
   6  11   6   14.57   13.20
  -6  11  -6   -1.28   11.59
  -7 -11  -6   -8.47   13.48
  -7 -11  -6    1.54   13.18
   7  11   6    4.88   13.23
  -7  11  -6   29.03   14.42
  -8 -11  -6    6.20   15.03
  -8  11  -6   10.18   15.41
   8 -12  -6   -8.85   13.10
   8  12  -6   22.03   14.19
   7 -12  -6   12.38   14.34
   7  12  -6   24.74   14.60
  -7  12   6   24.78   15.76
   6 -12  -6  298.98   32.40
  -6  12   6  303.22   33.30
   6  12  -6  300.81   31.12
   5 -12  -6  152.47   22.45
  -5  12   6  142.31   23.41
   5  12  -6  167.26   22.90
   4 -12  -6    7.19    9.73
   4 -12  -6    3.63   10.85
   4  12  -6   19.32   11.37
  -4  12   6   22.17   12.94
   3 -12  -6   -3.91    9.18
   3 -12  -6    3.32    7.83
  -3  12   6   12.39   11.80
   3  12  -6    5.60   10.32
   2 -12  -6  436.24   36.15
   2 -12  -6  421.80   32.64
   2  12  -6  439.69   35.12
  -2  12   6  418.22   36.52
   1 -12  -6   22.82   11.72
   1 -12  -6   24.40    8.07
  -1 -12   6   20.87    9.21
   1  12  -6   20.88   11.02
  -1  12   6    0.16    9.56
   0 -12  -6  169.73   16.07
   0 -12  -6  193.84   23.27
   0  12   6  115.39   19.40
   0  12  -6  185.33   20.67
  -1 -12  -6  113.92   18.31
  -1  12  -6  117.57   17.15
   1  12   6  143.41   19.70
  -2 -12  -6   47.05   13.77
  -2  12  -6   33.26   12.16
   2  12   6   11.95   11.19
  -3 -12  -6   -4.25   10.36
   3  12   6   16.66   11.99
  -3  12  -6   -3.89    9.79
  -4 -12  -6  117.40   19.51
  -4  12  -6   73.30   16.09
   4  12   6  103.95   18.96
  -5 -12  -6   75.90   16.91
   5  12   6   85.87   18.60
  -5  12  -6   46.17   15.23
  -6 -12  -6   32.19   14.92
   6  12   6   18.47   14.59
  -6  12  -6   25.66   13.58
  -7 -12  -6   33.51   15.20
   7  12   6    5.22   13.79
  -7  12  -6   21.51   15.27
   8 -13  -6  -10.02   12.17
   8  13  -6   11.97   13.34
   7 -13  -6   51.99   18.18
   7  13  -6   34.79   15.39
   6 -13  -6   -2.05   12.97
   6  13  -6   15.02   13.79
  -6  13   6   25.90   16.64
   5 -13  -6   81.41   16.16
   5 -13  -6   48.58   16.40
  -5  13   6   70.03   18.56
   5  13  -6   78.95   17.63
   4 -13  -6    0.26   12.29
   4 -13  -6   -2.67    9.20
   4  13  -6    1.67   11.24
  -4  13   6   -3.75   11.91
   3 -13  -6   22.37   12.75
   3 -13  -6    7.97    8.44
  -3  13   6    6.32   12.26
   3  13  -6    9.27   11.20
   2 -13  -6    8.08    7.87
   2 -13  -6   17.76   11.79
   2  13  -6  -10.18    9.65
  -2  13   6   -7.44   10.41
   1 -13  -6   12.07   11.01
   1 -13  -6   14.97    7.26
   1  13  -6    9.17   11.14
  -1  13   6   20.42   12.02
   0 -13  -6    3.37   10.45
   0  13  -6   -5.20    9.69
   0  13   6    8.53   11.78
  -1 -13  -6   38.11   13.67
  -1  13  -6   56.68   13.29
   1  13   6   31.84   13.09
  -2 -13  -6   14.55   12.87
  -2  13  -6   17.73   12.29
   2  13   6   42.94   13.46
  -3 -13  -6   81.07   18.43
  -3  13  -6   88.80   16.97
   3  13   6   78.15   17.57
  -4 -13  -6   50.54   15.58
   4  13   6   22.31   14.63
  -4  13  -6   49.73   14.96
  -5 -13  -6   15.33   14.18
   5  13   6   31.97   15.05
  -5  13  -6    6.82   13.00
  -6 -13  -6   33.24   16.19
  -6  13  -6   22.52   14.93
   6  13   6   39.67   17.33
   7 -14  -6    0.87   15.17
   7  14  -6   11.19   15.04
   6 -14  -6   11.97   14.84
  -6  14   6   24.83   16.51
   6  14  -6   16.17   14.80
   5 -14  -6   29.30   13.15
   5 -14  -6   64.02   17.50
  -5  14   6   46.48   17.85
   5  14  -6   40.97   16.14
   4 -14  -6    7.28    9.64
   4 -14  -6   -3.94   13.13
  -4  14   6   28.28   15.50
   4  14  -6   17.13   13.09
   3 -14  -6   -6.94    7.24
   3 -14  -6   -0.32   10.99
   3  14  -6  -16.77   11.05
  -3  14   6   14.97   13.38
   2 -14  -6   16.03   12.07
   2 -14  -6   10.24    7.94
  -2  14   6    1.30   12.57
   2  14  -6    2.09   11.83
   1 -14  -6    3.06   11.47
  -1  14   6   18.19   13.51
   1  14  -6   13.89   12.13
   0 -14  -6   13.89   12.01
   0  14  -6   17.58   11.84
   0  14   6    5.88   11.77
  -1 -14  -6   39.90   14.51
   1  14   6   33.73   15.21
  -1  14  -6   65.32   15.03
  -2 -14  -6   93.99   18.10
   2  14   6   77.69   18.65
  -2  14  -6   89.73   17.54
  -3 -14  -6   -1.54   11.90
   3  14   6   27.03   13.92
  -3  14  -6    0.90   11.66
  -4 -14  -6   16.67   13.58
   4  14   6    2.80   13.18
  -4  14  -6   20.70   13.52
  -5 -14  -6   12.13   13.64
   5  14   6   24.72   15.48
  -5  14  -6   53.59   16.06
  -6 -14  -6   -6.71   13.77
  -6  14  -6   37.85   14.92
   6  14   6   18.98   16.66
   6 -15  -6   19.60   12.87
   6 -15  -6   20.19   16.62
   6  15  -6   26.44   15.79
   5 -15  -6   32.73   12.56
   5 -15  -6   20.40   16.19
   5  15  -6   20.90   14.18
  -5  15   6   16.34   15.66
   4 -15  -6  263.83   27.55
   4 -15  -6  246.80   31.24
   4  15  -6  240.46   29.34
  -4  15   6  282.04   33.29
   3 -15  -6   67.26   16.92
   3 -15  -6   35.04   11.19
   3  15  -6   35.10   15.22
  -3  15   6   53.63   17.22
   2 -15  -6   10.11   13.01
  -2  15   6   -1.84   12.15
   2  15  -6   24.91   13.73
   1 -15  -6   18.02   13.12
   1  15  -6   -3.23   11.94
  -1  15   6    4.48   12.50
   0 -15  -6  338.81   36.55
   0  15   6  388.90   38.32
   0  15  -6  379.76   36.57
  -1 -15  -6   40.51   15.37
  -1  15  -6   10.97   12.46
   1  15   6   20.16   14.15
  -2 -15  -6   78.23   18.09
   2  15   6   59.47   17.07
  -2  15  -6   62.71   16.72
  -3 -15  -6   76.18   19.60
  -3  15  -6   78.59   18.48
   3  15   6  109.74   21.15
  -4 -15  -6   18.62   15.15
   4  15   6  -14.82   13.00
  -4  15  -6   18.25   14.28
  -5 -15  -6   -8.68   13.26
   5  15   6    0.41   14.44
  -5  15  -6    6.01   14.65
   5 -16  -6    7.09   11.58
   5 -16  -6    8.95   15.52
   5  16  -6   16.09   15.69
   4 -16  -6  -15.71   13.40
   4 -16  -6   18.20   10.68
  -4  16   6    8.41   15.51
   4  16  -6    5.48   13.30
   3 -16  -6   16.49   13.86
  -3  16   6    5.95   15.18
   3  16  -6   19.76   15.15
   2 -16  -6   88.40   19.52
  -2  16   6   88.78   20.74
   2  16  -6  119.91   21.47
   1 -16  -6   15.37   13.83
   1  16  -6   26.01   14.28
  -1  16   6    2.97   13.61
   0 -16  -6   63.30   18.87
   0  16  -6   78.21   18.26
   0  16   6   73.76   18.94
  -1 -16  -6  168.74   25.82
   1  16   6  205.54   28.51
  -1  16  -6  156.68   23.75
  -2 -16  -6  -11.65   12.18
  -2  16  -6    5.27   13.03
   2  16   6   -3.37   12.74
  -3 -16  -6    2.61   14.01
   3  16   6   17.91   15.14
  -3  16  -6    0.37   13.90
  -4 -16  -6   12.50   15.64
   4  16   6   -4.44   14.42
  -4  16  -6   33.70   17.00
   3 -17  -6   20.98   15.52
   3  17  -6    2.52   14.82
  -3  17   6   26.56   16.56
   2 -17  -6   20.38   14.04
   2  17  -6   32.71   15.64
  -2  17   6   25.72   16.32
   1 -17  -6   21.13   15.45
  -1  17   6   -9.95   13.67
   1  17  -6    8.78   13.83
   0 -17  -6   22.36   14.99
   0  17  -6   20.83   14.89
   0  17   6   -0.61   14.04
  -1 -17  -6   21.42   14.81
  -1  17  -6   16.35   13.84
   1  17   6   18.52   15.87
  -2 -17  -6    1.48   13.93
  -2  17  -6   23.71   15.22
   2  17   6   30.75   17.50
  11   0  -7  -10.26   12.05
  11   0  -7   -3.54   11.51
  10   0  -7   15.81   11.37
  10   0  -7   -8.64   11.70
   9   0  -7   -8.80    9.38
   9   0  -7   -6.81    9.68
   8   0  -7   15.13   10.30
   8   0  -7  -14.34    8.76
  -7   0   7   -4.06    8.63
   7   0  -7   -4.22    7.48
   7   0  -7   -5.70    8.30
   6   0  -7    1.20    7.60
  -6   0   7    5.98    7.16
   6   0  -7  -11.92    7.42
  -5   0   7    0.04    5.88
   5   0  -7   20.94    7.01
   5   0  -7   -1.81    7.71
   4   0  -7    3.16    5.69
  -4   0   7   -8.29    4.46
   4   0  -7  -11.96    6.78
  -3   0   7    1.78    3.93
   3   0  -7   -4.20    6.07
   3   0  -7    1.65    4.62
   3   0  -7   -3.42    3.91
   2   0  -7    3.60    6.20
   2   0  -7    1.47    3.58
   2   0  -7    4.84    6.57
   2   0  -7    2.17    3.54
   1   0  -7   -1.59    2.59
   1   0  -7   -3.27    6.46
   1   0  -7   -0.21    2.63
   1   0  -7    2.39    7.27
   0   0   7    0.35    2.17
   0   0  -7   -5.52    3.03
   0   0  -7    0.04    6.82
   0   0  -7   -3.24    2.88
   0   0  -7   -9.93    6.55
   1   0   7    0.01    3.47
   1   0   7    1.85    3.24
  -1   0  -7   -0.93    4.20
  -1   0  -7    5.46    3.76
  -1   0  -7   -0.74    7.14
  -1   0  -7    0.42    4.13
   2   0   7   -5.74    4.09
  -2   0  -7    1.83    4.43
   2   0   7   -0.52    4.54
  -2   0  -7   -4.53    4.92
  -3   0  -7   -8.76    5.61
   3   0   7   -1.42    4.95
   3   0   7   -1.76    5.47
   4   0   7   -5.91    5.32
  -4   0  -7    4.25    6.60
   4   0   7   -1.86    5.94
   5   0   7    0.91    7.60
  -5   0  -7    1.78    8.46
   6   0   7   -4.06    8.24
  -6   0  -7   -5.45    8.35
  -7   0  -7    6.74    9.88
  -8   0  -7    9.48   11.13
  -9   0  -7   -3.99   12.05
 -10   0  -7    3.96   13.22
  11  -1  -7   12.87   12.94
  11  -1  -7    5.80   13.28
  11   1  -7  -12.90   11.91
  11   1  -7  -10.91   13.05
  10  -1  -7   68.25   16.10
  10  -1  -7   70.75   17.42
  10   1  -7   76.12   16.27
  10   1  -7   80.40   17.28
   9  -1  -7  193.37   23.15
   9  -1  -7  184.13   23.73
   9   1  -7  210.30   24.84
   9   1  -7  193.04   22.27
   8  -1  -7  160.01   20.35
   8  -1  -7  136.67   19.14
   8   1  -7  188.06   21.84
   8   1  -7  172.11   20.00
   7  -1  -7   32.98   10.85
   7  -1  -7   44.50   12.35
  -7   1   7   35.70   10.62
   7   1  -7   57.29   12.34
   7   1  -7   54.04   11.74
  -6  -1   7  108.55   13.28
   6  -1  -7   99.31   14.96
   6  -1  -7  104.92   14.10
   6   1  -7   94.57   13.63
   6   1  -7  103.32   14.48
  -6   1   7  107.44   13.68
   5  -1  -7  210.09   19.15
   5  -1  -7  181.45   20.30
  -5  -1   7  224.07   17.42
   5   1  -7  203.90   20.06
  -5   1   7  218.58   18.15
   5   1  -7  180.54   18.31
   4  -1  -7   -7.03    5.01
  -4  -1   7    7.73    4.67
   4  -1  -7    5.04    8.37
   4   1  -7    1.18    7.18
   4   1  -7    3.21    5.65
  -4   1   7    1.21    4.85
  -3  -1   7  517.34   34.57
   3  -1  -7  514.30   38.38
   3  -1  -7  575.22   35.92
   3  -1  -7  543.77   35.97
   3   1  -7  528.49   38.07
  -3   1   7  565.03   35.44
   3   1  -7  548.06   35.39
   3   1  -7  579.56   35.41
   2  -1  -7  420.26   27.32
   2  -1  -7  421.42   30.24
   2  -1  -7  434.70   31.71
   2  -1  -7  420.80   27.28
  -2   1   7  376.73   26.77
   2   1  -7  408.81   26.41
   2   1  -7  402.36   29.84
   2   1  -7  417.39   30.71
   2   1  -7  446.93   26.44
   1  -1  -7  162.32   12.06
   1  -1  -7  164.03   12.21
   1  -1  -7  181.41   17.33
   1  -1  -7  134.44   15.73
   1   1  -7  159.24   15.80
   1   1  -7  185.25   16.78
   0  -1  -7  176.03   12.52
   0  -1  -7  164.99   17.29
   0  -1  -7  163.43   12.60
   0  -1   7  165.22   11.45
   0  -1  -7  155.43   15.86
   0   1  -7  153.69   16.07
   0   1   7  160.43   12.81
   0   1  -7  172.43   11.24
   1  -1   7  718.09   50.17
  -1  -1  -7  788.98   47.61
  -1  -1  -7  747.93   53.41
  -1  -1  -7  768.07   49.79
  -1  -1  -7  772.03   47.61
  -1   1  -7  772.82   46.93
  -1   1  -7  798.23   47.16
   1   1   7  675.77   50.61
   1   1   7  728.62   47.08
   2  -1   7 1336.00   85.75
  -2  -1  -7 1404.32   86.68
   2  -1   7 1470.89   92.53
  -2  -1  -7 1354.59   86.56
  -2   1  -7 1371.84   86.19
  -2   1  -7 1402.35   86.41
   2   1   7 1407.33   86.30
   2   1   7 1381.64   92.77
   3  -1   7   39.41    7.58
  -3  -1  -7   38.77    8.23
   3   1   7   35.43    7.93
  -3   1  -7   36.01    8.33
   3   1   7   52.98    8.69
  -4  -1  -7  132.76   14.74
   4  -1   7  109.73   13.04
   4   1   7  116.39   13.44
   4   1   7   96.42   12.75
  -4   1  -7   89.40   13.16
  -5  -1  -7  817.38   57.46
   5  -1   7  887.50   57.18
   5   1   7  854.65   57.34
  -5   1  -7  815.68   57.43
   5   1   7  874.85   61.28
   6  -1   7   13.02    9.16
  -6  -1  -7   -3.37    8.16
   6   1   7    2.55    9.25
  -6   1  -7    0.28    9.21
  -7  -1  -7  163.62   20.67
  -7   1  -7  193.94   21.82
  -8  -1  -7   15.96   12.64
  -8   1  -7   -5.33   10.96
  -9  -1  -7   63.56   16.19
  -9   1  -7   39.89   15.35
 -10  -1  -7    9.35   13.20
 -10   1  -7   -3.57   12.50
  11  -2  -7  130.16   21.35
  11  -2  -7   86.85   20.02
  11   2  -7   67.13   18.63
  11   2  -7  113.30   18.99
  10  -2  -7   -4.13   12.81
  10  -2  -7    4.22   12.12
  10   2  -7   18.24   12.14
  10   2  -7    1.66   12.35
   9  -2  -7  163.82   22.24
   9  -2  -7  135.14   19.99
   9   2  -7  169.76   20.10
   9   2  -7  126.57   20.14
   8  -2  -7   29.03   11.34
   8  -2  -7   68.43   14.29
   8   2  -7   71.63   12.64
   8   2  -7   54.31   13.28
   7  -2  -7  142.99   18.47
   7  -2  -7  148.09   18.91
  -7  -2   7  167.39   17.76
  -7   2   7  167.56   18.45
   7   2  -7  150.78   18.48
   7   2  -7  130.27   17.08
  -6  -2   7    5.59    6.03
   6  -2  -7    2.19    8.14
   6  -2  -7  -11.42    7.49
  -6  -2   7    3.80    6.59
   6   2  -7    3.07    7.87
  -6   2   7   15.17    7.71
   6   2  -7   17.48    8.57
   5  -2  -7  518.59   37.33
  -5  -2   7  540.42   36.02
   5  -2  -7  553.09   39.04
  -5  -2   7  557.51   38.76
   5   2  -7  522.37   37.08
   5   2  -7  565.84   38.47
  -5   2   7  494.16   36.62
  -4  -2   7   68.82    8.52
   4  -2  -7   55.49   11.12
   4  -2  -7   73.27   10.08
  -4  -2   7   82.99    8.92
   4   2  -7   86.11   10.06
  -4   2   7   72.60    9.41
   4   2  -7   57.88    9.63
   4   2  -7   70.85   11.32
   3  -2  -7  215.24   17.26
  -3  -2   7  215.82   15.43
   3  -2  -7  233.85   21.01
   3   2  -7  208.12   16.24
   3   2  -7  203.25   19.78
   3   2  -7  212.85   15.96
  -3   2   7  230.73   16.69
   2  -2  -7   36.88    6.39
   2  -2  -7   39.88    6.40
   2  -2  -7   27.99    8.08
  -2   2   7   38.04    5.70
   2   2  -7   39.70    7.48
   2   2  -7   21.48    4.42
   2   2  -7   34.04    9.75
   2   2  -7   32.76    4.50
   1  -2  -7  221.25   16.51
   1  -2  -7  228.84   20.99
   1  -2  -7  234.01   16.71
   1  -2  -7  228.44   20.43
  -1   2   7  216.27   15.78
   1   2  -7  231.88   20.33
   1   2  -7  238.28   19.44
   0  -2  -7  585.54   43.59
   0  -2   7  617.42   39.07
   0  -2  -7  593.40   38.19
   0  -2  -7  589.78   38.12
   0  -2  -7  551.64   40.14
   0   2   7  591.16   40.66
   0   2  -7  598.14   36.66
   0   2  -7  603.44   40.53
   0   2  -7  597.21   36.58
   0   2   7  584.92   37.78
  -1  -2  -7  420.46   29.14
  -1  -2  -7  416.34   33.86
  -1  -2  -7  421.97   31.08
  -1  -2  -7  457.00   29.34
   1   2   7  441.47   31.32
  -1   2  -7  448.52   28.15
   1   2   7  414.73   28.87
  -1   2  -7  438.60   28.40
   2  -2   7  101.83    9.70
  -2  -2  -7   83.61   13.82
  -2  -2  -7   89.80   10.92
  -2   2  -7   80.69    9.33
   2   2   7   89.70   10.18
  -2   2  -7   99.37   10.36
   2   2   7   74.57   10.30
  -3  -2  -7  387.84   29.44
   3  -2   7  418.61   28.56
  -3   2  -7  395.35   29.19
   3   2   7  414.84   31.07
   3   2   7  399.26   29.02
   4  -2   7  196.22   17.03
  -4  -2  -7  176.21   17.31
  -4  -2  -7  130.30   16.09
   4   2   7  139.49   16.34
  -4   2  -7  126.61   16.20
   4   2   7  169.25   17.66
   5  -2   7    3.86    7.62
  -5  -2  -7   10.25    8.43
  -5  -2  -7    3.57    7.81
   5   2   7    3.99    7.37
  -5   2  -7   -1.18    8.44
   5   2   7    2.63    7.59
  -6  -2  -7    1.52    8.53
  -6  -2  -7   -0.95    8.98
   6   2   7   -5.10    7.55
   6   2   7    4.62    8.32
  -6   2  -7    6.81    9.76
  -7  -2  -7   27.82   11.88
  -7  -2  -7   22.16   10.77
  -7   2  -7    8.76   11.00
  -8  -2  -7   28.90   12.60
  -8  -2  -7    5.58   11.49
  -8   2  -7   26.55   13.83
  -9  -2  -7   -3.33   11.09
  -9  -2  -7    1.53   11.45
  -9   2  -7   16.02   13.84
 -10  -2  -7   27.32   14.95
 -10  -2  -7   22.56   14.98
 -10   2  -7    1.60   13.97
  11  -3  -7    7.45   14.41
  11  -3  -7    2.60   13.19
  11   3  -7    8.72   13.30
  10  -3  -7   17.57   13.24
  10  -3  -7  -14.69   11.92
  10   3  -7    8.30   13.12
  10   3  -7    3.30   10.07
   9  -3  -7   41.99   14.39
   9  -3  -7   81.49   16.83
   9   3  -7   95.36   14.74
   9   3  -7   66.06   15.98
   8  -3  -7   20.94   11.48
   8  -3  -7   46.19   13.35
   8   3  -7   23.26   10.72
   8   3  -7   52.39   13.04
   7  -3  -7   -7.11    8.77
   7  -3  -7  -12.02    9.05
  -7  -3   7   -3.09    5.90
  -7   3   7    0.82    8.14
   7   3  -7   11.23    9.47
   7   3  -7   11.46    9.01
  -6  -3   7   99.55   12.37
   6  -3  -7   83.15   14.32
  -6  -3   7   83.64   11.82
   6  -3  -7   74.70   12.94
  -6  -3   7  131.05   13.89
  -6   3   7  111.97   14.14
   6   3  -7   92.72   13.76
   6   3  -7   95.82   13.68
  -5  -3   7    2.43    5.35
  -5  -3   7    0.57    4.76
   5  -3  -7   -0.24    6.65
   5  -3  -7   10.67    9.05
   5   3  -7    2.84    6.85
  -5   3   7   -7.65    5.89
   5   3  -7  -11.22    6.46
   4  -3  -7    1.15    8.33
  -4  -3   7   11.98    4.97
  -4  -3   7    8.86    5.01
   4  -3  -7    7.42    6.47
  -4   3   7   10.48    6.10
   4   3  -7    7.10    7.66
   4   3  -7   16.45    6.51
   3  -3  -7    9.35    5.95
   3  -3  -7    8.93    8.14
  -3  -3   7   15.71    4.63
  -3  -3   7   23.67    4.77
   3   3  -7   10.14    5.05
   3   3  -7   19.76    5.26
   3   3  -7    9.82    4.83
  -3   3   7   12.48    5.54
   3   3  -7   14.63    8.15
   2  -3  -7   -1.59    6.24
  -2  -3   7    4.66    3.12
   2  -3  -7   11.75    5.43
   2   3  -7    2.27    3.83
   2   3  -7    1.10    3.44
   2   3  -7    3.40    5.21
  -2   3   7    6.75    4.97
   2   3  -7   -0.19    6.89
   1  -3  -7  282.92   19.69
   1  -3  -7  244.73   23.20
  -1  -3   7  257.41   18.23
   1  -3  -7  267.57   19.67
   1  -3  -7  276.22   22.07
   1   3  -7  292.50   17.60
   1   3  -7  258.62   17.20
  -1   3   7  258.02   18.93
   1   3  -7  249.18   22.13
   0  -3  -7  254.83   23.49
   0  -3  -7  264.59   19.52
   0  -3  -7  255.78   21.64
   0  -3  -7  280.27   19.49
   0   3   7  249.34   18.98
   0   3   7  265.63   20.41
   0   3  -7  249.45   17.19
   0   3  -7  268.56   17.67
  -1  -3  -7   18.17    9.81
  -1  -3  -7   17.54    6.14
  -1  -3  -7    6.34    6.83
  -1   3  -7   10.96    4.26
  -1   3  -7   10.79    4.94
   1   3   7    6.20    5.45
   1   3   7   10.24    5.41
   2  -3   7  286.75   20.79
  -2  -3  -7  312.72   22.71
  -2  -3  -7  332.36   26.95
   2   3   7  315.77   22.31
  -2   3  -7  262.08   20.99
   2   3   7  312.38   23.83
  -2   3  -7  272.15   21.73
  -3  -3  -7   -2.08    5.94
   3  -3   7   13.14    6.05
  -3  -3  -7   23.14   10.36
   3   3   7   13.82    6.49
   3   3   7    3.13    6.38
  -3   3  -7    8.71    6.95
   4  -3   7  144.54   15.28
  -4  -3  -7  127.24   16.18
   4   3   7  149.55   16.35
  -4   3  -7  142.76   16.00
   4   3   7  148.43   16.35
   5  -3   7   -6.23    6.99
  -5  -3  -7    5.35    8.62
  -5  -3  -7    1.74    8.55
   5   3   7   -6.89    7.06
   5   3   7    6.06    8.30
  -5   3  -7    0.34    8.50
  -6  -3  -7    0.05    9.45
  -6  -3  -7   -9.08    8.38
   6   3   7    7.35    9.11
   6   3   7   -6.86    8.53
  -6   3  -7   -2.04    9.42
  -7  -3  -7   57.84   13.52
  -7  -3  -7   62.84   13.82
  -7   3  -7   23.42   13.40
  -8  -3  -7    7.34   11.72
  -8  -3  -7    5.70   11.51
  -8   3  -7   10.40   13.37
  -9  -3  -7    1.32   11.38
  -9  -3  -7    0.83   11.80
  -9   3  -7   18.52   14.77
 -10  -3  -7   17.04   15.37
 -10  -3  -7   11.36   14.61
 -10   3  -7   -3.99   13.73
  11  -4  -7   23.61   14.86
  11  -4  -7   -4.84   13.45
  11   4  -7    3.67   13.61
  10  -4  -7   63.25   17.56
  10  -4  -7   69.20   18.14
  10   4  -7   89.40   18.51
   9  -4  -7    9.54   12.37
   9  -4  -7  -12.39   10.77
   9   4  -7  -32.03    9.01
   9   4  -7   11.81    9.89
   8  -4  -7   54.85   14.46
   8  -4  -7   64.59   15.15
   8   4  -7   54.40   12.11
   8   4  -7   36.59   13.07
   7  -4  -7  225.29   23.82
   7  -4  -7  194.66   22.13
  -7  -4   7  256.92   21.63
   7   4  -7  208.00   21.08
  -7   4   7  175.35   21.29
   7   4  -7  213.96   22.66
  -6  -4   7    0.55    5.47
   6  -4  -7   10.96    8.44
   6  -4  -7   -7.75    8.73
   6   4  -7   -0.61    7.37
   6   4  -7   -5.65    7.21
  -6   4   7   -3.89    6.88
   5  -4  -7   15.08    8.36
   5  -4  -7    2.91    8.60
  -5  -4   7    8.41    5.78
  -5  -4   7   29.31    7.43
   5   4  -7   11.93    7.46
   5   4  -7    1.13    7.69
  -5   4   7   13.67    7.52
   4  -4  -7   81.14   13.57
  -4  -4   7   68.89    9.72
   4  -4  -7   74.51   11.22
  -4  -4   7   84.23    9.85
   4   4  -7   86.74   12.11
  -4   4   7   91.43   11.05
   4   4  -7   85.39   10.71
  -3  -4   7  171.23   13.22
  -3  -4   7  160.97   14.40
   3  -4  -7  185.75   16.66
   3  -4  -7  192.30   18.84
   3   4  -7  157.01   13.79
   3   4  -7  155.99   14.29
  -3   4   7  167.81   15.47
   3   4  -7  170.41   13.39
   3   4  -7  160.56   16.63
  -2  -4   7   44.35    6.14
   2  -4  -7   36.43    9.98
   2  -4  -7   33.78    7.68
   2   4  -7   45.24    7.14
   2   4  -7   45.32    9.57
   2   4  -7   58.71    6.47
   2   4  -7   49.29    6.83
  -2   4   7   42.28    7.87
   1  -4  -7  163.73   16.97
  -1  -4   7  175.39   13.38
   1  -4  -7  183.82   15.47
  -1   4   7  164.98   14.61
   1   4  -7  185.93   18.16
  -1   4   7  196.98   16.14
   1   4  -7  168.72   12.67
   1   4  -7  164.22   13.23
   0  -4   7  216.37   16.73
   0  -4  -7  227.15   18.22
   0  -4  -7  222.79   19.67
   0  -4  -7  244.89   22.07
   0   4   7  239.23   17.91
   0   4  -7  230.45   16.31
   0   4   7  240.94   19.12
   0   4  -7  200.56   15.67
  -1  -4  -7  206.68   17.24
  -1  -4  -7  178.46   17.62
   1  -4   7  194.62   14.52
  -1  -4  -7  184.17   20.06
   1   4   7  203.36   16.93
  -1   4  -7  196.73   15.79
   1   4   7  219.15   18.28
  -1   4  -7  210.45   15.19
  -2  -4  -7    1.69    8.90
  -2  -4  -7    4.43    6.53
  -2  -4  -7    2.95    6.11
   2  -4   7    3.94    4.52
   2   4   7    3.95    5.84
  -2   4  -7   -3.20    5.36
  -2   4  -7    6.61    5.13
   2   4   7   -3.36    5.64
   3  -4   7  280.56   22.45
  -3  -4  -7  297.62   24.59
  -3  -4  -7  307.82   27.90
   3   4   7  291.52   24.04
   3   4   7  345.17   25.91
  -3   4  -7  315.43   24.06
   4  -4   7  240.88   20.00
  -4  -4  -7  230.96   25.48
  -4  -4  -7  228.37   22.43
   4   4   7  235.80   21.09
   4   4   7  192.30   22.10
  -4   4  -7  275.38   21.89
  -5  -4  -7   29.08   11.04
  -5  -4  -7    6.87    8.88
  -5   4  -7   24.39   10.16
   5   4   7   28.11   10.13
   5   4   7   35.34   10.50
  -6  -4  -7   17.05   10.21
  -6   4  -7   12.69   10.66
   6   4   7   20.78   10.59
   6   4   7    7.01   10.10
  -7  -4  -7  718.42   50.49
  -7   4  -7  606.03   49.93
  -8  -4  -7  104.01   19.14
  -8   4  -7   82.44   17.74
  -9  -4  -7   20.03   15.17
  -9   4  -7   12.04   13.88
  11  -5  -7    8.48   14.45
  11  -5  -7   10.52   13.57
  11   5  -7   24.93   15.60
  10  -5  -7   -8.62   12.46
  10   5  -7   -0.45   12.79
   9  -5  -7  144.13   20.94
   9   5  -7   93.53   15.74
   9   5  -7  153.59   21.50
   8  -5  -7   45.68   13.99
   8  -5  -7   15.30   11.65
   8   5  -7   40.65   11.03
   8   5  -7   27.63   11.95
   7  -5  -7  112.03   18.23
  -7  -5   7  135.36   16.64
   7  -5  -7  129.86   17.80
   7   5  -7  105.44   15.87
   7   5  -7  110.25   14.84
  -7   5   7  121.07   16.56
  -6  -5   7  106.91   13.34
   6  -5  -7   75.11   13.63
   6  -5  -7   87.81   15.11
   6   5  -7   88.36   12.77
  -6   5   7   79.13   13.60
   6   5  -7   77.12   13.05
   5  -5  -7  510.38   38.24
   5  -5  -7  455.40   38.46
  -5  -5   7  547.69   39.15
  -5  -5   7  540.10   37.27
  -5   5   7  560.63   37.99
   5   5  -7  496.46   36.98
   5   5  -7  554.81   37.01
   4  -5  -7   44.69    9.30
  -4  -5   7   33.19    7.22
   4  -5  -7   26.01   10.06
  -4  -5   7   29.40    7.04
   4   5  -7   14.21    7.25
  -4   5   7   39.61    8.68
   4   5  -7   24.12    8.86
   3  -5  -7  122.03   13.85
  -3  -5   7  116.79   12.23
   3  -5  -7  136.25   16.26
  -3  -5   7  116.49   11.05
   3   5  -7  110.51   11.98
  -3   5   7  104.43   12.84
   3   5  -7  122.24   11.82
   3   5  -7  116.09   13.54
   3   5  -7  114.65   10.18
  -2  -5   7  580.48   40.30
  -2  -5   7  571.37   36.94
   2  -5  -7  609.86   40.58
   2  -5  -7  538.63   39.16
   2   5  -7  593.02   39.75
   2   5  -7  574.76   38.04
  -2   5   7  613.34   39.31
   2   5  -7  572.43   37.40
   1  -5  -7  173.23   16.23
   1  -5  -7  152.54   16.48
  -1  -5   7  161.33   13.95
  -1   5   7  178.95   16.63
   1   5  -7  161.26   13.03
  -1   5   7  183.47   15.36
   1   5  -7  173.19   14.06
   0  -5  -7   55.96    9.14
   0  -5  -7   52.37   12.14
   0  -5   7   48.76    6.13
   0  -5  -7   37.80    8.67
   0  -5   7   44.47    6.67
   0   5  -7   44.93    7.30
   0   5  -7   47.14    6.40
   0   5   7   45.16    8.51
   0   5   7   52.70    8.77
  -1  -5  -7  107.48   13.08
  -1  -5  -7  133.12   16.01
   1  -5   7  115.40   10.37
  -1  -5  -7  104.88   12.93
  -1   5  -7  128.17   11.07
  -1   5  -7  122.77   12.15
   1   5   7  110.03   12.76
   1   5   7  111.22   12.85
  -2  -5  -7  303.30   24.18
  -2  -5  -7  337.72   25.79
   2  -5   7  316.67   22.98
  -2  -5  -7  318.98   28.58
  -2   5  -7  351.60   24.53
   2   5   7  318.18   24.63
   2   5   7  318.46   26.62
   3  -5   7   60.21    8.77
  -3  -5  -7   36.79   12.32
  -3  -5  -7   54.61   10.49
   3   5   7   54.78   10.68
  -3   5  -7   52.47   10.31
   3   5   7   51.22   10.04
  -4  -5  -7   18.15    8.38
   4  -5   7   14.38    6.93
  -4  -5  -7   18.12   11.15
   4   5   7    7.74    7.97
   4   5   7    2.21    7.65
  -4   5  -7   -3.83    8.04
  -5  -5  -7   97.19   16.72
  -5  -5  -7  146.97   20.03
  -5   5  -7  101.93   16.26
   5   5   7  149.45   18.16
   5   5   7  157.61   18.15
  -6  -5  -7  239.35   25.84
  -6  -5  -7  207.96   26.39
  -6   5  -7  253.90   26.13
   6   5   7  270.17   27.17
  -7  -5  -7    6.13   11.66
  -7  -5  -7   -0.70   10.79
  -7   5  -7    2.86   11.53
  -8  -5  -7   64.43   16.75
  -8  -5  -7   49.81   14.67
  -8   5  -7   31.81   15.49
  -9  -5  -7  255.73   30.86
  -9  -5  -7  288.70   31.82
  -9   5  -7  235.72   30.41
  10  -6  -7   69.77   18.03
  10   6  -7   37.20   15.87
   9  -6  -7   -8.10   11.60
   9   6  -7    2.73   11.31
   8  -6  -7    5.54   10.70
   8   6  -7    6.77   10.57
   8   6  -7    6.97    8.72
   7  -6  -7    7.22    9.39
   7  -6  -7    1.86    9.96
  -7  -6   7    2.45    6.56
   7   6  -7  -12.81    7.86
  -7   6   7   -7.70    9.13
   7   6  -7    1.78    7.73
  -6  -6   7   31.54    8.35
   6  -6  -7    5.92    9.23
   6  -6  -7   21.49   11.37
   6   6  -7   23.02    8.61
   6   6  -7   18.17    9.67
  -6   6   7   19.86    9.33
   5  -6  -7   70.27   13.95
   5  -6  -7   51.51   11.53
  -5  -6   7   52.07    9.53
   5   6  -7   59.10   10.60
   5   6  -7   61.53   11.21
  -5   6   7   47.24   10.85
   4  -6  -7   -2.43    8.76
   4  -6  -7   11.71    7.99
  -4  -6   7   17.15    6.33
  -4  -6   7   11.26    6.15
  -4   6   7    5.34    7.58
   4   6  -7    9.92    7.27
   4   6  -7   17.23    7.06
   3  -6  -7   11.07    8.45
   3  -6  -7    3.94    7.05
  -3  -6   7    1.21    4.75
  -3  -6   7   -3.13    4.50
  -3   6   7   -2.09    6.70
   3   6  -7   -3.08    6.12
   3   6  -7   -0.75    3.24
   3   6  -7   12.52    7.29
  -2  -6   7  149.25   14.43
  -2  -6   7  146.30   13.22
   2  -6  -7  149.27   17.34
   2  -6  -7  168.37   16.47
   2   6  -7  159.62   13.34
   2   6  -7  165.84   15.19
  -2   6   7  187.46   17.03
   2   6  -7  177.85   16.78
  -1  -6   7   30.74    5.58
   1  -6  -7   18.83    7.93
  -1  -6   7   28.02    6.18
   1  -6  -7   43.07    9.12
  -1   6   7   29.56    8.00
   1   6  -7   32.01    7.05
  -1   6   7   26.04    7.54
   1   6  -7   36.92    5.98
   0  -6  -7   72.41   10.95
   0  -6   7   83.87    9.74
   0  -6  -7   93.74   11.91
   0  -6   7   94.33    9.02
   0   6   7   95.01   11.98
   0   6   7   78.03   10.96
   0   6  -7   74.53    9.24
   0   6  -7   79.18    9.97
  -1  -6  -7    4.84    6.10
  -1  -6  -7   -0.58    8.69
   1  -6   7    5.49    4.79
  -1  -6  -7    9.38    7.26
   1   6   7   -0.14    6.07
  -1   6  -7    3.27    6.23
   1   6   7   -4.76    6.05
  -2  -6  -7   -1.43    6.90
  -2  -6  -7   -0.20    5.67
  -2  -6  -7    1.59    9.96
   2  -6   7    0.40    4.60
  -2   6  -7   -3.27    6.52
   2   6   7    0.92    6.77
   2   6   7    1.55    6.80
  -3  -6  -7   19.62   10.68
   3  -6   7   14.40    6.69
  -3  -6  -7   17.12    8.73
   3   6   7   26.86    8.80
   3   6   7    7.71    7.00
  -3   6  -7   17.92    8.16
  -4  -6  -7    8.80    8.51
  -4  -6  -7   21.31   11.20
   4   6   7   14.08    8.52
   4   6   7    0.10    7.51
  -4   6  -7    6.62    8.77
  -5  -6  -7   -0.34    9.36
  -5  -6  -7    1.57   10.60
   5   6   7   12.66    8.74
   5   6   7   13.78    9.98
  -5   6  -7    8.72   10.20
  -6  -6  -7    7.16   10.48
  -6  -6  -7   19.93   12.45
   6   6   7   11.07   10.77
  -6   6  -7   18.97   11.52
  -7  -6  -7    7.61   12.19
  -7  -6  -7   14.64   13.82
  -7   6  -7   25.17   13.00
  -8  -6  -7    5.40   12.93
  -8  -6  -7   14.24   15.33
  -8   6  -7   -9.04   13.43
  -9  -6  -7    2.85   14.56
  -9  -6  -7  -10.74   12.46
  -9   6  -7   -2.59   14.08
  10  -7  -7   29.14   16.65
  10   7  -7   75.08   17.79
   9  -7  -7  154.15   23.08
   9   7  -7  181.65   24.30
   8  -7  -7   27.69   13.07
   8   7  -7   28.29   12.91
   7  -7  -7  -11.90    9.22
   7  -7  -7   -5.31    9.45
   7   7  -7   -7.37    8.95
  -7   7   7   18.80   11.48
   6  -7  -7   65.16   14.29
   6  -7  -7   50.66   12.34
  -6  -7   7   53.44   10.73
  -6   7   7   58.13   13.04
   6   7  -7   34.73   11.34
   6   7  -7   50.44   10.36
   5  -7  -7   49.25   12.54
   5  -7  -7   35.17   11.07
  -5  -7   7   37.52    9.25
  -5   7   7   73.83   12.74
   5   7  -7   44.90   10.83
   5   7  -7   68.41   10.72
   4  -7  -7   -2.47    7.70
  -4  -7   7    0.79    5.33
   4  -7  -7    0.99    7.56
   4   7  -7    5.15    6.75
   4   7  -7    2.95    7.69
   3  -7  -7  280.69   25.59
   3  -7  -7  306.61   26.33
  -3  -7   7  317.08   25.04
  -3  -7   7  310.65   23.06
  -3   7   7  309.29   25.65
   3   7  -7  314.50   24.50
   3   7  -7  325.43   24.29
  -2  -7   7  126.09   13.71
   2  -7  -7  127.86   15.22
   2  -7  -7  104.99   14.44
  -2  -7   7  134.89   12.83
  -2   7   7  135.06   15.89
   2   7  -7  138.58   14.19
  -2   7   7  155.92   16.27
  -1  -7   7    8.54    4.62
   1  -7  -7   10.62    6.84
   1  -7  -7    0.84    6.58
  -1  -7   7    4.69    5.08
   1   7  -7   -7.41    5.79
  -1   7   7    7.07    6.61
  -1   7   7   12.79    6.90
   0  -7  -7    6.93    6.49
   0  -7   7    6.16    5.35
   0  -7  -7    6.52    7.02
   0  -7   7    2.47    4.77
   0   7   7   12.18    7.41
   0   7  -7    1.65    6.40
   0   7   7   -0.43    6.62
  -1  -7  -7  143.34   16.06
  -1  -7  -7  110.83   17.22
   1  -7   7  139.35   13.08
  -1  -7  -7  131.92   13.88
  -1   7  -7  145.91   14.65
   1   7   7  111.63   14.94
   1   7   7  149.74   16.14
  -2  -7  -7  118.81   17.14
   2  -7   7  127.60   13.21
  -2  -7  -7  127.40   13.54
  -2  -7  -7   97.00   14.67
  -2   7  -7  121.71   14.44
   2   7   7  102.34   14.85
   2   7   7  145.14   16.64
  -3  -7  -7   88.21   15.51
  -3  -7  -7   87.74   14.40
   3   7   7  103.06   14.45
  -3   7  -7   77.71   12.72
   3   7   7   79.61   12.40
  -4  -7  -7    3.32    9.42
  -4  -7  -7    3.61    9.15
   4   7   7   -0.21    6.76
   4   7   7   41.71   10.88
  -4   7  -7   15.43    9.15
  -5  -7  -7   91.35   15.99
  -5  -7  -7  117.92   19.28
  -5   7  -7   72.49   14.86
   5   7   7   95.71   16.03
  -6  -7  -7   69.50   17.25
  -6  -7  -7   49.16   14.66
  -6   7  -7   46.61   14.15
   6   7   7   50.85   13.64
  -7  -7  -7   11.19   12.08
  -7  -7  -7    6.52   13.63
  -7   7  -7    9.34   12.19
  -8  -7  -7   -2.95   11.96
  -8  -7  -7    7.97   14.62
  -8   7  -7    2.89   12.84
  -9  -7  -7  151.47   25.44
  -9  -7  -7  124.28   22.81
  -9   7  -7  151.05   25.53
  10  -8  -7   19.52   16.05
  10   8  -7   35.59   16.30
   9  -8  -7   18.78   13.18
   9   8  -7   -3.81   11.90
   8  -8  -7   89.50   17.21
   8   8  -7   49.71   15.23
   7  -8  -7  111.43   18.32
   7   8  -7  119.02   17.85
   6  -8  -7   53.62   14.52
  -6  -8   7   65.04   11.39
   6  -8  -7   45.33   13.03
   6   8  -7   74.11   13.50
  -6   8   7   89.78   15.27
   5  -8  -7   11.82   10.31
  -5  -8   7    8.97    6.99
   5  -8  -7   23.78   10.49
   5   8  -7    7.01    7.30
  -5   8   7   11.20   10.52
   5   8  -7   14.01    9.01
   4  -8  -7  560.02   41.99
   4  -8  -7  573.02   42.25
  -4  -8   7  603.05   43.06
   4   8  -7  579.86   39.52
   4   8  -7  544.98   40.72
  -4   8   7  566.63   41.90
   3  -8  -7  456.93   34.43
  -3  -8   7  459.68   34.24
   3  -8  -7  441.76   34.13
  -3   8   7  444.69   34.26
   3   8  -7  435.81   33.38
  -2  -8   7   53.04    8.80
   2  -8  -7   35.09    9.63
   2  -8  -7   62.16   11.74
   2   8  -7   40.66    9.57
  -2   8   7   58.69   11.12
  -2   8   7   58.18   11.92
   1  -8  -7  384.28   28.42
   1  -8  -7  396.90   29.84
  -1  -8   7  339.75   29.08
  -1   8   7  407.02   31.31
   1   8  -7  385.34   28.29
  -1   8   7  364.29   29.35
   0  -8  -7  436.70   32.44
   0  -8  -7  430.62   34.23
   0   8   7  439.72   34.44
   0   8   7  505.85   36.92
   0   8  -7  496.80   33.25
  -1  -8  -7  101.09   14.80
  -1  -8  -7  102.71   12.59
  -1   8  -7  131.76   14.45
   1   8   7  117.98   15.25
   1   8   7  108.09   15.18
  -2  -8  -7   19.73    7.05
  -2  -8  -7   40.00   12.11
  -2  -8  -7   15.16    9.05
   2   8   7   30.30    9.75
  -2   8  -7   22.54    9.14
   2   8   7   40.23   10.06
  -3  -8  -7  156.20   20.08
  -3  -8  -7  132.27   17.32
   3   8   7  151.62   18.34
  -3   8  -7  139.24   17.09
  -4  -8  -7   31.05   12.31
  -4  -8  -7   18.99   10.81
   4   8   7   37.72   10.96
   4   8   7   29.14   11.46
  -4   8  -7   31.28   10.48
  -5  -8  -7   55.43   14.56
  -5  -8  -7    7.28   10.95
   5   8   7   -0.61    9.82
  -5   8  -7    4.15   10.55
  -6  -8  -7  131.78   20.65
  -6  -8  -7  117.73   19.06
   6   8   7  102.58   17.92
  -6   8  -7   86.60   16.88
  -7  -8  -7  309.55   33.41
  -7  -8  -7  256.89   29.32
  -7   8  -7  231.46   28.52
  -8  -8  -7   19.46   16.07
  -8  -8  -7   11.38   13.98
  -8   8  -7   -0.18   13.86
  -9  -8  -7    9.73   14.47
  -9  -8  -7   16.86   17.21
  -9   8  -7    8.99   15.46
  10  -9  -7  -16.27   13.12
  10   9  -7   -3.94   13.33
   9  -9  -7   17.17   14.37
   9   9  -7    5.38   12.44
   8  -9  -7   23.75   13.56
   8   9  -7    6.97   11.64
   7  -9  -7   28.92   13.56
   7   9  -7   41.88   13.02
   6  -9  -7   -3.21   10.73
   6  -9  -7    0.31   10.13
  -6   9   7   -3.87   10.63
   6   9  -7   -5.40    9.19
   5  -9  -7    2.55   10.17
   5  -9  -7   -5.77    8.66
  -5  -9   7   -0.95    6.82
  -5   9   7    2.69   10.31
   5   9  -7   10.51    9.75
   4  -9  -7   -1.65    8.51
  -4  -9   7    3.97    6.04
   4  -9  -7    9.60    9.25
   4   9  -7   14.74    9.00
  -4   9   7    2.71    9.31
   3  -9  -7   90.44   14.41
   3  -9  -7   87.88   14.40
  -3  -9   7   89.68   12.46
   3   9  -7  103.14   14.49
  -3   9   7  102.33   15.78
  -3   9   7   75.64   13.51
  -2  -9   7    7.70    6.24
   2  -9  -7    6.76    7.96
   2  -9  -7    6.76    8.29
   2   9  -7    1.66    7.79
  -2   9   7    8.92    8.46
  -2   9   7   11.42    9.20
  -1  -9   7   47.69    9.25
   1  -9  -7   31.19    9.07
   1  -9  -7   49.54   11.03
  -1   9   7   60.36   11.80
   1   9  -7   38.48   10.09
  -1   9   7   54.15   11.77
   0  -9  -7    5.89    6.34
   0  -9  -7    5.92    8.14
   0   9   7   20.37    8.90
   0   9  -7    5.50    7.65
   0   9   7   -1.68    7.48
  -1  -9  -7    2.27    6.12
  -1  -9  -7   -0.50    7.81
   1   9   7   11.67    9.00
   1   9   7    0.26    8.07
  -1   9  -7    9.17    8.09
  -2  -9  -7   42.66    7.97
  -2  -9  -7   37.53   10.99
   2   9   7   21.70   10.17
  -2   9  -7   23.37    9.63
   2   9   7   26.45   10.07
  -3  -9  -7   16.22   10.49
  -3  -9  -7    5.82   10.45
   3   9   7   -1.80    9.29
  -3   9  -7   -4.50    8.81
   3   9   7   11.11    8.58
  -4  -9  -7   15.48   11.48
  -4  -9  -7   31.80   11.89
   4   9   7    6.55    9.82
  -4   9  -7   16.03   10.49
  -5  -9  -7    4.42   11.98
  -5  -9  -7    2.08   10.77
   5   9   7    2.22   10.80
  -5   9  -7   -2.71    9.49
  -6  -9  -7    6.69   12.76
  -6  -9  -7   -9.68   10.70
   6   9   7   -4.83   11.15
  -6   9  -7    9.06   11.98
  -7  -9  -7   -1.47   12.17
  -7  -9  -7   31.49   15.15
  -7   9  -7    0.78   12.66
  -8  -9  -7   10.48   15.05
  -8  -9  -7    5.03   13.55
  -8   9  -7    9.07   14.87
   9 -10  -7    5.04   14.22
   9  10  -7   -9.33   11.69
   8 -10  -7   -5.81   12.12
   8  10  -7   23.12   13.26
   7 -10  -7   71.62   16.67
   7  10  -7   78.03   16.09
   6 -10  -7   37.40   13.31
   6 -10  -7   14.05   12.55
   6  10  -7   16.81   11.71
  -6  10   7   37.18   13.69
   5 -10  -7  -12.25    8.76
   5 -10  -7   -7.35    9.57
  -5  10   7   18.49   12.21
   5  10  -7   -1.79    9.63
   4 -10  -7  191.18   22.45
   4 -10  -7  139.18   18.66
  -4 -10   7  168.16   19.19
  -4  10   7  162.80   20.75
   4  10  -7  129.58   19.00
   3 -10  -7  122.91   16.90
   3 -10  -7  118.72   17.34
  -3 -10   7  106.47   15.09
   3  10  -7  142.09   17.85
  -3  10   7  149.93   18.90
  -3  10   7  144.85   18.27
  -2 -10   7    3.28    6.23
   2 -10  -7    4.92    7.25
   2 -10  -7    8.11    8.91
   2  10  -7   -0.80    8.11
  -2  10   7   -6.65    8.53
  -2  10   7  -12.21    6.71
   1 -10  -7  477.21   32.41
   1 -10  -7  424.95   34.34
  -1 -10   7  401.64   34.01
  -1  10   7  373.70   33.59
  -1  10   7  481.25   36.71
   1  10  -7  428.52   33.76
   0 -10  -7  437.61   30.76
   0  10   7  414.13   35.87
   0  10   7  424.31   34.10
   0  10  -7  410.71   32.82
  -1 -10  -7   -4.49    5.84
  -1 -10  -7   19.24   10.24
   1  10   7   29.70   10.66
  -1  10  -7   25.48   10.16
   1  10   7   19.04   10.54
  -2 -10  -7  125.48   18.59
  -2 -10  -7  129.83   13.33
  -2  10  -7  116.63   16.29
   2  10   7  121.62   16.97
  -3 -10  -7  122.32   17.94
  -3  10  -7  110.18   16.96
   3  10   7  136.55   18.94
  -4 -10  -7   87.66   16.64
  -4 -10  -7   64.10   16.31
  -4  10  -7  106.16   15.94
   4  10   7  103.73   17.64
  -5 -10  -7  -10.41   11.02
  -5 -10  -7  -10.41   10.21
   5  10   7    3.62   10.55
  -5  10  -7   12.29   10.96
  -6 -10  -7   55.18   15.23
  -6 -10  -7   10.53   13.56
  -6  10  -7   41.35   13.97
  -7 -10  -7   35.17   16.42
  -7 -10  -7   30.15   14.67
  -7  10  -7    5.04   13.63
  -8 -10  -7   29.14   14.97
  -8 -10  -7    1.43   16.18
  -8  10  -7   34.54   16.95
   9 -11  -7   18.84   14.87
   9  11  -7   19.34   14.82
   8 -11  -7    8.06   13.97
   8  11  -7   16.22   13.67
   7 -11  -7   60.63   16.62
   7 -11  -7   61.58   15.88
   7  11  -7   61.38   16.37
   6 -11  -7  361.92   35.06
   6 -11  -7  297.92   33.49
   6  11  -7  420.10   34.26
   5 -11  -7   95.46   17.79
   5 -11  -7   94.78   17.26
  -5  11   7  107.19   19.31
   5  11  -7  126.64   18.52
   4 -11  -7   -1.48   10.43
   4 -11  -7   -3.86    8.98
  -4  11   7   11.99   11.35
   4  11  -7   -7.37   10.13
   3 -11  -7   94.70   15.50
   3 -11  -7  122.79   18.29
  -3 -11   7   97.97   15.00
   3  11  -7   95.89   15.79
  -3  11   7  104.84   17.53
   2 -11  -7   66.47   14.24
   2 -11  -7   72.55   12.87
  -2 -11   7   79.20   13.35
   2  11  -7   96.51   15.35
  -2  11   7  100.35   16.52
   1 -11  -7    2.13    9.17
   1 -11  -7   12.12    7.72
  -1 -11   7    0.20    7.15
  -1  11   7   23.99   11.51
   1  11  -7   -3.45    9.62
   0 -11  -7   11.17   10.23
   0 -11  -7   14.26    6.50
   0  11  -7   28.63   10.94
   0  11   7   17.30   11.71
  -1 -11  -7   52.61   13.36
  -1 -11  -7   43.25    8.63
   1  11   7   56.48   13.55
  -1  11  -7   28.79   11.01
  -2 -11  -7   56.34   14.10
  -2  11  -7   50.78   12.64
   2  11   7   69.32   14.95
  -3 -11  -7    3.21   10.51
  -3  11  -7   17.32   11.15
   3  11   7   17.34   11.56
  -4 -11  -7   58.02   15.02
  -4  11  -7   45.50   13.89
   4  11   7   43.07   14.29
  -5 -11  -7  204.00   26.43
  -5 -11  -7  170.98   24.23
   5  11   7  194.04   24.82
  -5  11  -7  170.27   22.11
  -6 -11  -7   14.24   14.13
  -6 -11  -7   21.40   13.45
  -6  11  -7   -3.48   11.39
  -7 -11  -7    0.69   13.21
  -7 -11  -7  -14.80   12.99
  -7  11  -7    4.41   13.59
   8 -12  -7   19.35   14.77
   8  12  -7   -7.09   12.93
   7 -12  -7   -5.04   10.96
   7 -12  -7   -3.48   12.32
   7  12  -7    5.14   13.51
   6 -12  -7  -11.42   11.97
   6 -12  -7   26.43   13.78
   6  12  -7   31.95   13.46
   5 -12  -7    1.81   10.22
   5 -12  -7   16.29   13.25
  -5  12   7   44.68   16.09
   5  12  -7   -3.80   11.34
   4 -12  -7  -10.40    8.25
   4 -12  -7   -0.33   10.71
  -4  12   7   -3.46   11.41
   4  12  -7   -0.23   10.77
   3 -12  -7   20.47   11.90
   3 -12  -7   30.37   10.40
  -3  12   7   15.11   12.40
   3  12  -7   23.26   11.63
   2 -12  -7   68.12   14.92
   2 -12  -7   49.59   11.37
  -2 -12   7   59.95   12.25
   2  12  -7   63.05   14.42
  -2  12   7   65.75   15.77
   1 -12  -7   27.14   12.40
  -1 -12   7   34.92    9.75
   1 -12  -7   29.63    8.68
   1  12  -7   51.88   13.22
  -1  12   7   26.69   12.48
   0 -12  -7   40.54   13.54
   0 -12  -7   23.52    7.54
   0  12  -7   37.90   11.97
   0  12   7   56.70   14.76
  -1 -12  -7   39.73   12.79
   1  12   7   61.97   14.69
  -1  12  -7   29.26   11.78
  -2 -12  -7    6.46   10.86
  -2  12  -7   20.59   11.25
   2  12   7   15.31   11.57
  -3 -12  -7    0.03   10.88
   3  12   7   -3.53   10.98
  -3  12  -7    0.68   11.12
  -4 -12  -7  -12.31   11.32
  -4  12  -7   11.32   11.79
   4  12   7    2.72   11.35
  -5 -12  -7   -9.99   10.97
  -5  12  -7   12.39   11.62
  -6 -12  -7    0.51   12.82
  -6  12  -7    2.15   12.37
  -7 -12  -7   -3.50   13.03
  -7 -12  -7  -13.59   13.98
  -7  12  -7    3.50   13.52
   7 -13  -7   16.13   14.71
   7 -13  -7   17.14   13.29
   7  13  -7    0.97   12.89
   6 -13  -7  131.22   23.31
   6 -13  -7  101.89   19.60
   6  13  -7  115.94   21.30
   5 -13  -7   84.84   16.05
   5 -13  -7   57.64   17.95
   5  13  -7  110.22   19.52
   4 -13  -7   10.01   10.11
   4 -13  -7   10.44   12.60
  -4  13   7   -2.67   11.79
   4  13  -7   20.46   12.56
   3 -13  -7    5.92   11.21
   3 -13  -7    9.01    8.92
   3  13  -7   21.75   12.10
  -3  13   7   22.49   13.34
   2 -13  -7    3.60   11.19
   2 -13  -7   25.62    9.46
  -2  13   7   56.28   14.27
   2  13  -7   18.44   12.22
   1 -13  -7   26.98    8.92
   1 -13  -7    6.57   11.15
   1  13  -7    4.23   11.32
  -1  13   7   17.75   12.85
   0 -13  -7   -0.32   10.67
   0  13   7   10.21   12.75
   0  13  -7   22.07   11.45
  -1 -13  -7   10.79   11.53
   1  13   7    3.83   11.52
  -1  13  -7   -3.81    9.76
  -2 -13  -7   60.53   16.13
  -2  13  -7   83.16   15.79
   2  13   7   88.66   18.03
  -3 -13  -7   20.67   13.58
   3  13   7   46.57   15.10
  -3  13  -7   50.31   14.50
  -4 -13  -7    7.22   13.13
  -4  13  -7    6.63   12.86
   4  13   7   23.69   14.12
  -5 -13  -7   87.62   19.74
  -5  13  -7  110.66   19.13
  -6 -13  -7   96.83   20.41
  -6  13  -7   76.14   18.47
   7 -14  -7   28.30   17.13
   7 -14  -7   91.02   19.78
   7  14  -7   48.77   16.66
   6 -14  -7   -0.45   11.48
   6 -14  -7  -17.15   12.44
   6  14  -7   -7.51   12.96
   5 -14  -7   63.25   18.65
   5 -14  -7   52.72   14.57
   5  14  -7   58.62   16.55
   4 -14  -7   44.86   16.12
   4 -14  -7   38.81   12.86
   4  14  -7   59.43   16.40
   3 -14  -7   42.86   12.36
   3 -14  -7   50.33   15.69
   3  14  -7   26.26   13.94
  -3  14   7   74.18   17.89
   2 -14  -7    0.56   11.11
   2 -14  -7    5.44    7.94
  -2  14   7   13.21   12.26
   2  14  -7   -6.31   11.56
   1 -14  -7   16.62   11.94
  -1  14   7   27.94   13.32
   1  14  -7   21.69   12.95
   0 -14  -7  288.74   31.35
   0  14   7  387.39   36.01
   0  14  -7  287.47   30.89
  -1 -14  -7   15.51   11.66
  -1  14  -7   11.36   12.31
   1  14   7   16.76   13.35
  -2 -14  -7  -10.51   10.30
  -2  14  -7   14.36   12.60
   2  14   7   13.83   13.73
  -3 -14  -7   59.26   17.01
   3  14   7   65.65   16.76
  -3  14  -7   63.25   16.41
  -4 -14  -7   45.84   16.71
  -4  14  -7   80.21   17.77
  -5 -14  -7   11.09   14.06
  -5  14  -7   11.91   12.53
   6 -15  -7    3.15   11.81
   6 -15  -7   13.23   15.21
   6  15  -7   26.36   15.87
   5 -15  -7    4.80   14.66
   5 -15  -7   12.42   10.99
   5  15  -7  -11.98   12.03
   4 -15  -7   17.00   10.92
   4 -15  -7   14.59   14.84
   4  15  -7   15.10   14.84
   3 -15  -7   31.30   15.29
   3 -15  -7   43.31   11.68
   3  15  -7   24.30   14.20
   2 -15  -7   17.33   13.39
  -2  15   7    5.19   12.27
   2  15  -7    6.45   13.21
   1 -15  -7   17.92   13.69
  -1  15   7   57.28   17.32
   1  15  -7   31.34   13.80
   0 -15  -7   16.69   13.63
   0  15   7   19.01   13.45
   0  15  -7   41.92   14.54
  -1 -15  -7    4.58   12.45
   1  15   7   15.77   14.38
  -1  15  -7  -28.38    9.87
  -2 -15  -7   -0.17   12.77
  -2  15  -7  -11.69   11.27
  -3 -15  -7    4.19   13.20
  -3  15  -7  -17.99   11.04
  -4 -15  -7   32.27   16.11
  -4  15  -7   50.07   15.63
   4 -16  -7  121.52   22.70
   4 -16  -7   79.73   16.71
   4  16  -7   67.62   19.51
   3 -16  -7    3.64   13.62
   3  16  -7   35.57   16.26
   2 -16  -7   21.57   15.15
   2  16  -7   27.55   14.59
   1 -16  -7   32.99   14.79
   1  16  -7   30.44   15.22
   0 -16  -7   11.63   14.67
   0  16  -7   25.52   14.43
  -1 -16  -7  103.54   22.47
  -1  16  -7  113.80   20.03
  -2 -16  -7   -4.02   13.49
  -2  16  -7    5.62   13.40
  -3 -16  -7    4.98   13.88
  -3  16  -7    0.08   13.50
   2 -17  -7  107.99   22.71
   2  17  -7   94.86   21.48
   1 -17  -7   96.97   22.13
   1  17  -7  111.22   21.73
   0 -17  -7   24.58   15.87
   0  17  -7   21.05   15.59
  -1 -17  -7  100.27   21.34
  11   0  -8  -13.93   12.09
  11   0  -8    8.77   13.30
  10   0  -8  131.92   20.53
  10   0  -8  117.22   20.21
   9   0  -8  924.51   63.06
   9   0  -8  877.20   63.73
   8   0  -8   23.38   11.66
   8   0  -8   13.56   10.57
   7   0  -8   96.42   15.71
   7   0  -8   88.94   14.58
   6   0  -8  291.87   27.22
   6   0  -8  286.98   24.45
   5   0  -8  181.96   17.08
   5   0  -8  155.43   19.30
  -5   0   8  192.94   16.22
  -4   0   8   62.77    8.25
   4   0  -8   62.85   11.08
   4   0  -8   62.02    8.86
   4   0  -8   68.76    8.78
   3   0  -8  327.36   21.33
   3   0  -8  308.85   21.37
   3   0  -8  264.32   24.28
   2   0  -8  292.48   18.55
   2   0  -8  271.39   18.41
   2   0  -8  262.41   23.86
   2   0  -8  268.16   23.23
   1   0  -8  203.32   20.17
   1   0  -8  224.05   14.26
   1   0  -8  202.53   20.24
   1   0  -8  216.93   14.20
   0   0  -8  397.79   25.10
   0   0   8  391.34   26.68
   0   0  -8  398.61   25.02
   0   0  -8  393.07   31.14
   0   0  -8  372.48   29.36
   1   0   8  482.21   32.02
  -1   0  -8  459.19   33.35
  -1   0  -8  456.00   30.13
  -1   0  -8  445.20   29.87
   2   0   8  540.99   34.39
  -2   0  -8  541.03   34.58
   2   0   8  457.90   36.84
  -2   0  -8  560.34   35.09
   3   0   8   59.98    9.33
  -3   0  -8   58.55    9.84
   3   0   8   71.37    9.54
  -4   0  -8  127.72   14.46
   4   0   8   97.97   13.03
   4   0   8  124.77   14.74
  -5   0  -8 1101.96   72.28
  -6   0  -8   47.68   12.03
  -7   0  -8   96.06   15.97
  -8   0  -8   11.94   12.03
  -9   0  -8   53.22   15.56
  11  -1  -8   29.85   15.51
  11  -1  -8   35.01   16.04
  11   1  -8   45.88   15.55
  11   1  -8   32.64   15.22
  10  -1  -8   15.51   12.82
  10  -1  -8   11.51   12.52
  10   1  -8  -11.01   11.54
  10   1  -8   43.65   13.80
   9  -1  -8    0.43   10.89
   9  -1  -8    0.95   11.22
   9   1  -8    3.33   11.01
   9   1  -8  -11.86    9.91
   8  -1  -8    1.37   10.08
   8  -1  -8    6.34   10.27
   8   1  -8   16.20   10.57
   8   1  -8    0.33    9.84
   7  -1  -8  122.43   16.03
   7  -1  -8   93.96   15.17
   7   1  -8   99.10   14.87
   7   1  -8   88.63   15.17
   6  -1  -8    4.94    9.20
   6  -1  -8  -10.27    7.04
   6   1  -8   18.06    9.77
   6   1  -8   15.28    8.34
   5  -1  -8   15.49    9.25
  -5  -1   8   -8.56    4.72
   5  -1  -8   -5.25    6.36
   5   1  -8   -5.22    8.11
  -5   1   8    0.25    5.50
   5   1  -8    5.08    6.45
   4  -1  -8  304.10   26.28
  -4  -1   8  304.66   21.41
   4  -1  -8  324.59   23.00
   4   1  -8  302.38   24.82
   4   1  -8  318.98   22.64
   4   1  -8  317.70   22.24
  -4   1   8  292.52   22.10
   3  -1  -8  112.97   14.87
   3  -1  -8  101.13   10.67
   3  -1  -8  125.86   11.33
  -3   1   8  115.96   10.02
   3   1  -8  109.54   14.58
   3   1  -8  103.64    9.91
   3   1  -8  107.01    9.75
   2  -1  -8   47.75    6.38
   2  -1  -8   45.41    6.31
   2  -1  -8   44.87    9.74
   2  -1  -8   43.40   10.48
   2   1  -8   53.79    5.25
   2   1  -8   65.94   10.22
   2   1  -8   57.08    5.21
   2   1  -8   71.19   11.87
   1  -1  -8    0.82    7.50
   1  -1  -8   -0.32    3.23
   1  -1  -8    9.68    7.24
   1  -1  -8   -2.02    3.16
   1   1  -8   -2.66    6.88
   1   1  -8   11.87    7.54
   0  -1  -8   11.92    4.22
   0  -1  -8   29.55    8.91
   0  -1  -8   21.51    4.16
   0  -1  -8   19.93    9.31
   0  -1   8   17.85    2.58
   0   1  -8    9.73    8.20
   0   1  -8   15.38    3.02
   0   1   8   14.21    3.81
   0   1  -8   12.23    2.63
   0   1  -8   -1.02    7.27
  -1  -1  -8  199.66   15.07
  -1  -1  -8  174.38   20.01
  -1  -1  -8  188.97   15.30
   1  -1   8  195.69   15.23
  -1  -1  -8  171.11   18.76
   1   1   8  210.14   14.75
  -1   1  -8  199.95   14.32
   1   1   8  205.84   16.03
  -1   1  -8  202.95   14.65
   2  -1   8    2.04    4.55
  -2  -1  -8   10.25    5.95
  -2  -1  -8    4.16    5.04
   2  -1   8    7.94    4.44
   2   1   8    7.37    4.83
  -2   1  -8    7.36    5.43
  -2   1  -8    4.68    4.23
   2   1   8    2.50    4.86
  -3  -1  -8   33.01    8.06
  -3  -1  -8   34.03    8.02
   3  -1   8   30.42    7.56
  -3   1  -8   24.93    7.87
   3   1   8   39.16    8.10
   3   1   8   21.91    6.89
  -4  -1  -8  275.02   24.66
   4  -1   8  348.60   24.83
  -4   1  -8  292.57   24.82
   4   1   8  338.25   26.68
   4   1   8  283.87   24.52
  -5  -1  -8   -2.49    7.75
  -5   1  -8   12.99    9.26
   5   1   8    6.32    7.59
  -6  -1  -8   43.90   11.91
  -6   1  -8   47.81   12.27
  -7  -1  -8   19.03   11.26
  -7   1  -8   27.61   12.09
  -8  -1  -8   20.08   11.83
  -8   1  -8    0.50   10.71
  -9  -1  -8   15.82   12.99
  -9   1  -8   22.71   13.36
  11  -2  -8   24.60   14.71
  11  -2  -8   -5.73   12.92
  11   2  -8   10.18   12.69
  11   2  -8   22.28   15.70
  10  -2  -8   87.77   18.55
  10  -2  -8   67.05   16.99
  10   2  -8   87.99   16.65
  10   2  -8   59.50   16.77
   9  -2  -8   90.33   16.81
   9  -2  -8   75.84   16.00
   9   2  -8   68.35   14.88
   9   2  -8   52.70   15.42
   8  -2  -8   23.58   11.00
   8  -2  -8   29.28   12.50
   8   2  -8   -0.13    9.05
   8   2  -8   23.84   10.90
  -7  -2   8   55.65    9.53
   7  -2  -8   12.47    9.61
   7  -2  -8   29.94   10.95
   7   2  -8   37.84   11.50
   7   2  -8   46.74   11.72
  -6  -2   8    9.71    5.99
   6  -2  -8   11.59    8.84
   6  -2  -8    9.28    8.39
   6   2  -8    8.85    9.13
   6   2  -8   16.37    8.42
   5  -2  -8   -7.98    6.26
   5  -2  -8   -3.24    7.70
   5   2  -8   14.17    8.19
   5   2  -8   -0.73    6.24
  -5   2   8   -0.41    5.75
   4  -2  -8    9.85    9.19
   4  -2  -8    3.24    5.94
  -4  -2   8   -4.10    3.93
  -4   2   8   -2.98    5.01
   4   2  -8    5.44    5.20
   4   2  -8    3.71    7.80
   4   2  -8   -2.81    4.30
   3  -2  -8    1.10    5.14
   3  -2  -8    8.29    4.92
   3  -2  -8    6.76    8.03
   3   2  -8   -1.73    7.51
  -3   2   8    3.52    4.61
   3   2  -8    3.02    5.18
   3   2  -8    6.73    4.33
   3   2  -8    0.95    3.87
   2  -2  -8   22.69    5.45
   2  -2  -8   14.47    7.76
   2  -2  -8   15.31    5.32
   2   2  -8   20.39    6.85
  -2   2   8   17.79    4.33
   2   2  -8   20.42    3.44
   2   2  -8   16.34    8.59
   2   2  -8   18.31    3.53
   1  -2  -8   33.77    5.89
   1  -2  -8   37.88    6.05
   1  -2  -8   37.68    9.63
   1  -2  -8   29.66    9.48
   1   2  -8   24.18    8.17
   1   2  -8   41.91   10.03
   0  -2  -8  145.55   11.81
   0  -2  -8  131.23   11.78
   0  -2   8  134.21    9.89
   0  -2  -8  129.89   15.22
   0  -2  -8  158.29   17.80
   0   2   8  123.31   12.05
   0   2  -8  140.15    9.75
   0   2   8  142.40   11.10
   0   2  -8  128.83   16.37
  -1  -2  -8   24.93    6.36
  -1  -2  -8   30.77    9.87
  -1  -2  -8   22.18    6.01
  -1  -2  -8   46.20   10.10
   1   2   8   18.28    5.90
  -1   2  -8   34.25    5.77
   1   2   8   42.03    6.30
  -1   2  -8   28.77    4.88
   2  -2   8   77.10    8.25
  -2  -2  -8   54.16    9.39
  -2  -2  -8   75.97   13.66
  -2   2  -8   69.91    9.10
  -2   2  -8   73.30    8.64
   2   2   8   70.78    9.36
   2   2   8   66.31    9.20
  -3  -2  -8    6.15    7.18
   3  -2   8   27.28    6.79
  -3   2  -8   28.03    7.88
   3   2   8   32.06    7.54
   3   2   8   23.44    7.50
  -4  -2  -8   20.00    8.49
  -4  -2  -8    4.70    7.89
  -4   2  -8    7.11    8.15
   4   2   8   15.03    7.77
   4   2   8    7.35    7.46
  -5  -2  -8   21.00    9.46
  -5  -2  -8   18.12    9.40
  -5   2  -8   11.83    8.99
   5   2   8   11.86    8.51
  -6  -2  -8   56.58   13.25
  -6  -2  -8   44.44   11.94
  -6   2  -8   49.08   13.05
   6   2   8   37.61   11.71
  -7  -2  -8   39.47   12.14
  -7  -2  -8   26.75   11.65
  -7   2  -8   52.65   14.17
  -8  -2  -8    2.03   11.48
  -8  -2  -8    2.26   11.29
  -8   2  -8    5.25   12.04
  -9  -2  -8    0.82   12.34
  -9  -2  -8    2.57   11.79
  -9   2  -8   10.89   12.83
  11  -3  -8  142.15   25.00
  11  -3  -8  199.52   24.63
  11   3  -8  133.22   24.20
  10  -3  -8   28.10   12.36
  10  -3  -8    6.48   12.47
  10   3  -8    5.62   13.24
  10   3  -8   24.64   12.63
   9  -3  -8    7.73   12.21
   9  -3  -8    5.72   11.38
   9   3  -8   -8.07   10.22
   9   3  -8   17.14   12.28
   8  -3  -8    5.55   10.99
   8  -3  -8  -17.88    8.65
   8   3  -8   -5.80    8.54
   8   3  -8   11.05   10.61
  -7  -3   8  181.97   18.48
   7  -3  -8  191.91   22.43
   7  -3  -8  148.12   19.12
   7   3  -8  162.71   19.01
   7   3  -8  128.36   17.74
   6  -3  -8  104.13   15.79
  -6  -3   8   68.37   11.04
   6  -3  -8   68.32   12.48
   6   3  -8   88.40   13.65
   6   3  -8   92.43   13.02
   5  -3  -8   60.13   11.09
   5  -3  -8   75.13   13.39
  -5  -3   8   92.56   10.99
   5   3  -8   72.90   12.82
   5   3  -8   71.63   10.87
  -5   3   8   83.89   11.42
  -4  -3   8  193.61   17.15
   4  -3  -8  200.50   17.84
   4  -3  -8  234.43   22.28
  -4  -3   8  206.91   15.85
   4   3  -8  190.65   16.14
  -4   3   8  212.90   17.56
   4   3  -8  224.04   21.03
   4   3  -8  206.85   16.77
   3  -3  -8  402.60   28.67
   3  -3  -8  385.62   31.25
  -3  -3   8  382.17   28.86
   3   3  -8  425.26   27.27
   3   3  -8  427.08   30.94
   3   3  -8  419.18   29.55
  -3   3   8  390.75   27.88
   3   3  -8  442.23   27.46
   2  -3  -8   36.48    7.23
   2  -3  -8   47.08    7.48
  -2  -3   8   46.68    5.04
   2  -3  -8   36.28   10.11
   2   3  -8   38.18    9.44
  -2   3   8   35.75    6.61
   2   3  -8   56.91    8.81
   2   3  -8   37.96    5.13
   2   3  -8   41.97    5.34
   1  -3  -8   32.37    6.52
   1  -3  -8   25.41    9.17
   1  -3  -8   33.09    6.53
   1  -3  -8   28.51    8.96
  -1  -3   8   31.98    3.48
  -1   3   8   31.15    5.67
   1   3  -8   16.95    8.49
  -1   3   8   29.66    6.03
   0  -3  -8  518.96   35.00
   0  -3  -8  543.23   35.18
   0  -3  -8  519.47   40.47
   0  -3  -8  466.26   36.82
   0   3   8  543.26   34.76
   0   3   8  554.09   37.43
   0   3  -8  537.45   33.16
   0   3  -8  521.46   32.99
  -1  -3  -8  149.38   17.07
  -1  -3  -8  152.33   18.54
  -1  -3  -8  175.17   15.03
   1   3   8  146.07   13.75
  -1   3  -8  147.11   12.73
   1   3   8  165.30   15.04
  -1   3  -8  150.10   12.00
  -2  -3  -8   67.16   10.19
   2  -3   8   70.60    8.33
  -2  -3  -8   67.80   13.87
   2   3   8   65.59    9.63
   2   3   8   59.98    9.34
  -2   3  -8   77.52    8.80
  -2   3  -8   85.43    9.75
  -3  -3  -8  417.77   31.93
   3  -3   8  423.37   30.30
  -3  -3  -8  417.11   36.23
   3   3   8  437.35   31.33
  -3   3  -8  454.86   31.32
   3   3   8  471.03   33.94
  -4  -3  -8  118.27   18.08
  -4  -3  -8  140.94   16.29
   4   3   8  142.10   16.85
   4   3   8  167.37   16.77
  -4   3  -8  120.63   15.61
  -5  -3  -8   51.41   12.69
  -5   3  -8   75.97   13.39
   5   3   8   88.52   13.82
  -6  -3  -8    0.67   10.30
  -6   3  -8   26.64   11.29
   6   3   8   20.43   11.14
  -7  -3  -8  383.49   33.65
  -7  -3  -8  372.63   33.45
  -7   3  -8  386.41   33.98
  -8  -3  -8   69.07   16.89
  -8  -3  -8   99.71   18.09
  -8   3  -8   85.94   17.88
  -9  -3  -8   -7.61   11.95
  -9  -3  -8  -10.92   12.04
  -9   3  -8  -12.94   12.27
  11  -4  -8  -13.70   11.46
  11  -4  -8    2.36   14.58
  11   4  -8    8.94   14.76
  10  -4  -8    0.52   12.78
  10  -4  -8    6.11   13.04
  10   4  -8   28.86   14.24
  10   4  -8    8.79   10.93
   9  -4  -8   10.63   12.39
   9  -4  -8   -2.98   11.16
   9   4  -8    5.71   10.38
   9   4  -8    7.33   11.62
   8  -4  -8    2.17   10.47
   8  -4  -8   10.96   10.57
   8   4  -8    6.45    9.92
   8   4  -8  -10.24    9.47
   7  -4  -8   -0.70    8.90
   7  -4  -8    9.33    9.87
  -7  -4   8   -3.20    5.97
   7   4  -8  -10.12    7.90
   7   4  -8    5.52    9.10
   6  -4  -8  144.79   17.03
  -6  -4   8  124.68   15.40
   6  -4  -8  141.04   18.90
   6   4  -8  159.43   17.48
   6   4  -8  163.31   17.55
   5  -4  -8  175.97   18.46
  -5  -4   8  172.35   16.51
   5  -4  -8  176.00   21.27
   5   4  -8  163.99   16.51
  -5   4   8  167.00   17.05
   5   4  -8  162.88   18.36
   4  -4  -8    0.45    7.65
  -4  -4   8    6.27    4.72
   4  -4  -8   11.96    7.34
   4   4  -8   -7.02    7.70
   4   4  -8    7.57    5.29
  -4   4   8    8.17    6.25
   4   4  -8    0.64    5.78
   3  -4  -8   21.95    7.38
  -3  -4   8   23.85    5.44
   3  -4  -8   23.91    9.46
   3   4  -8   23.14    8.87
   3   4  -8   22.90    6.12
  -3   4   8   21.78    6.89
   3   4  -8   28.03    6.04
   3   4  -8   30.59    5.91
   2  -4  -8   97.75   11.16
   2  -4  -8  109.02   13.74
  -2  -4   8   70.70    8.39
   2   4  -8   98.03   11.01
   2   4  -8   84.51    8.62
  -2   4   8  104.25   10.72
   2   4  -8   99.09   13.64
   2   4  -8   99.31    8.44
  -1  -4   8   86.48    8.35
   1  -4  -8   84.40   13.01
   1  -4  -8   91.28   14.33
   1  -4  -8   79.57   10.49
   1   4  -8   85.12   12.41
  -1   4   8   87.18   10.07
   1   4  -8   97.27    8.30
  -1   4   8  112.29   11.42
   1   4  -8   95.75    7.85
   0  -4  -8   -0.39    7.06
   0  -4  -8   16.41    6.68
   0  -4  -8    7.12    8.84
   0   4   8    5.99    5.39
   0   4  -8    4.16    3.45
   0   4   8   20.24    5.90
   0   4  -8   17.52    4.76
  -1  -4  -8  108.94   12.77
  -1  -4  -8  108.48   16.76
  -1  -4  -8  132.07   14.49
   1   4   8  128.92   13.14
  -1   4  -8  120.64   11.06
   1   4   8   86.54   11.48
  -1   4  -8  120.59   10.61
   2  -4   8   50.52    7.63
  -2  -4  -8   77.30   11.51
  -2  -4  -8   69.60   10.38
  -2  -4  -8   65.82   13.62
  -2   4  -8   60.35    9.22
  -2   4  -8   56.42    8.01
   2   4   8   72.37    9.96
   2   4   8   58.75    9.49
  -3  -4  -8    8.07   10.13
  -3  -4  -8   27.45    8.79
  -3   4  -8    9.09    7.52
   3   4   8   48.09    9.20
   3   4   8   25.37    7.51
  -4  -4  -8    3.25    9.41
  -4  -4  -8    8.20    8.14
   4   4   8   -4.54    6.27
   4   4   8   -4.40    6.82
  -4   4  -8   10.97    8.33
  -5  -4  -8   49.30   12.32
  -5  -4  -8   47.02   13.83
   5   4   8   53.50   11.92
  -5   4  -8   55.25   12.13
  -6  -4  -8   90.24   16.88
  -6  -4  -8   82.50   15.07
  -6   4  -8   70.21   15.05
   6   4   8  112.86   17.07
  -7  -4  -8   17.94   11.83
  -7   4  -8    6.29   11.54
  -8  -4  -8   35.22   14.84
  -8   4  -8  -10.84   10.89
  -9  -4  -8    5.56   13.41
  -9   4  -8   29.92   15.36
  10  -5  -8   15.69   13.69
  10  -5  -8   11.89   14.56
  10   5  -8   12.37   13.57
   9  -5  -8   -2.55   11.96
   9  -5  -8   20.60   13.56
   9   5  -8   13.05   10.30
   9   5  -8    8.12   11.15
   8  -5  -8    0.91   10.33
   8  -5  -8   -7.62   10.25
   8   5  -8    0.21    9.43
   8   5  -8    6.36    9.15
   7  -5  -8    5.90    9.66
   7  -5  -8   -4.98   10.03
  -7  -5   8    8.10    7.24
   7   5  -8   14.00    8.97
   7   5  -8   27.85   10.34
   6  -5  -8   -2.98    8.22
  -6  -5   8    1.16    5.85
   6  -5  -8   -5.10    8.54
   6   5  -8   -3.64    7.54
   6   5  -8    4.13    8.07
  -5  -5   8   -4.83    5.17
   5  -5  -8    6.73   10.28
   5  -5  -8   -1.18    6.92
  -5   5   8   -5.32    7.08
   5   5  -8    1.47    7.00
   5   5  -8   -9.22    6.99
   4  -5  -8   33.19    9.01
   4  -5  -8   40.78   11.47
  -4  -5   8   40.00    7.28
   4   5  -8   36.37    8.35
   4   5  -8   43.00    9.81
  -4   5   8   40.60    8.81
   3  -5  -8   49.93    9.41
   3  -5  -8   30.64   10.03
  -3  -5   8   40.24    7.19
   3   5  -8   48.02   10.26
  -3   5   8   38.41    8.49
   3   5  -8   56.10    7.06
   3   5  -8   42.41    7.86
   3   5  -8   50.64    7.15
   2  -5  -8  149.05   16.33
  -2  -5   8  114.92   11.53
   2  -5  -8  127.25   13.60
   2   5  -8  119.36   10.55
   2   5  -8  123.45   15.19
   2   5  -8  134.43   11.91
  -2   5   8  125.96   13.53
  -1  -5   8   31.10    5.18
   1  -5  -8    7.43    7.51
   1  -5  -8   26.56    7.22
  -1   5   8   30.55    7.02
  -1   5   8   25.92    7.92
   1   5  -8   25.08    5.76
   1   5  -8   30.59    5.12
   0  -5  -8   11.93    6.50
   0  -5  -8   22.51    8.21
   0  -5  -8    5.95    7.84
   0   5   8   16.55    6.25
   0   5   8   22.11    6.88
   0   5  -8    3.43    3.75
   0   5  -8   18.49    5.30
  -1  -5  -8   28.79   11.53
  -1  -5  -8   39.23    9.12
  -1  -5  -8   62.59   10.04
   1  -5   8   54.90    6.77
  -1   5  -8   55.57    7.11
   1   5   8   43.39    8.34
   1   5   8   69.88    9.98
  -1   5  -8   44.82    7.83
  -2  -5  -8    0.91    6.77
  -2  -5  -8    0.64    9.33
  -2  -5  -8   -5.28    6.53
   2   5   8    5.52    6.42
  -2   5  -8   -7.61    5.70
   2   5   8    3.60    6.68
  -3  -5  -8   62.62   14.74
  -3  -5  -8   40.08   10.35
  -3   5  -8   49.37    9.92
   3   5   8   55.82   11.23
   3   5   8   64.40   10.82
  -4  -5  -8    2.15    9.92
  -4  -5  -8   -3.92    7.95
  -4   5  -8    7.48    8.67
   4   5   8    3.11    7.29
   4   5   8   -1.05    7.84
  -5  -5  -8   -2.77    8.70
  -5  -5  -8    3.23   11.36
  -5   5  -8   11.32   10.21
   5   5   8   -0.08    7.77
  -6  -5  -8    3.75   10.67
  -6  -5  -8  -10.83   11.53
  -6   5  -8   -5.43   10.56
  -7  -5  -8   -8.21   12.46
  -7  -5  -8    7.07   11.30
  -7   5  -8    1.83   11.49
  -8  -5  -8  136.65   23.06
  -8  -5  -8  128.09   20.94
  -8   5  -8  106.46   20.87
  -9  -5  -8   -3.70   13.13
  -9  -5  -8    5.17   15.13
  -9   5  -8  -25.56   12.68
  10  -6  -8   -5.57   13.16
  10  -6  -8   -7.28   12.56
  10   6  -8   -3.58   11.80
   9  -6  -8  147.79   22.12
   9  -6  -8  162.20   23.53
   9   6  -8  191.66   23.62
   8  -6  -8  118.77   19.41
   8  -6  -8   80.29   15.61
   8   6  -8   62.22   12.94
   8   6  -8   46.48   13.89
   7  -6  -8   -2.04    9.42
  -7  -6   8    1.42    6.54
   7  -6  -8  -18.45    8.22
   7   6  -8    3.77    8.55
   7   6  -8    1.18    9.47
   6  -6  -8   50.36   12.50
  -6  -6   8   45.17    9.19
   6  -6  -8   24.56   11.13
   6   6  -8   35.62   10.70
   6   6  -8   46.63   10.33
  -5  -6   8  132.83   15.23
   5  -6  -8  143.68   19.85
   5  -6  -8  131.72   17.01
  -5   6   8  122.29   15.91
   5   6  -8  154.75   16.50
   5   6  -8  155.78   16.74
   4  -6  -8   54.09   11.23
  -4  -6   8   71.15   10.18
   4  -6  -8   57.52   12.50
   4   6  -8   71.09   10.80
  -4   6   8   67.67   11.42
   4   6  -8   82.79   12.10
   3  -6  -8   31.31    9.12
  -3  -6   8   30.53    7.02
   3  -6  -8   50.04   11.28
   3   6  -8   28.12    9.71
  -3   6   8   54.43    9.69
   3   6  -8   47.13    8.77
   3   6  -8   35.71    6.92
   3   6  -8   41.86    6.99
   3   6  -8   40.35    6.41
   2  -6  -8  680.94   47.41
  -2  -6   8  678.95   47.79
   2  -6  -8  686.75   46.88
  -2   6   8  737.99   46.73
   2   6  -8  657.41   44.94
  -2   6   8  754.00   50.17
   2   6  -8  676.89   44.47
   2   6  -8  686.99   47.03
   1  -6  -8  176.33   17.74
   1  -6  -8  143.48   17.25
  -1  -6   8  177.42   15.51
  -1   6   8  189.71   18.55
  -1   6   8  198.61   17.94
   1   6  -8  192.46   14.34
   1   6  -8  191.43   15.51
   0  -6  -8   11.12    7.00
   0  -6  -8    8.15    7.37
   0  -6  -8    0.78    8.03
   0   6  -8   13.15    5.79
   0   6   8   10.11    6.89
   0   6  -8   13.50    4.82
   0   6   8   14.92    6.91
  -1  -6  -8  169.45   17.17
  -1  -6  -8  158.58   16.29
  -1  -6  -8  199.96   22.19
   1   6   8  139.89   16.53
   1   6   8  144.65   15.81
  -1   6  -8  153.09   14.93
  -1   6  -8  160.24   13.60
  -2  -6  -8  381.16   29.27
  -2  -6  -8  388.36   34.09
  -2  -6  -8  403.50   30.11
   2   6   8  420.93   32.13
   2   6   8  393.54   30.09
  -2   6  -8  373.10   28.65
  -3  -6  -8   95.51   16.26
  -3  -6  -8   62.28   11.98
   3   6   8   35.71    9.78
   3   6   8   45.82   10.52
  -3   6  -8   46.62   10.32
  -4  -6  -8   12.17   12.00
  -4  -6  -8   23.40    9.68
   4   6   8   35.37   10.23
   4   6   8   16.02    9.31
  -4   6  -8   19.38    9.64
  -5  -6  -8   72.10   14.48
  -5  -6  -8   69.62   17.49
  -5   6  -8   77.10   14.39
   5   6   8   93.39   15.35
  -6  -6  -8  110.51   17.45
  -6  -6  -8  133.91   21.04
  -6   6  -8  117.91   17.99
  -7  -6  -8   26.76   13.37
  -7  -6  -8   36.21   16.17
  -7   6  -8   35.23   14.01
  -8  -6  -8   75.21   19.42
  -8  -6  -8   80.28   17.53
  -8   6  -8   67.47   17.51
  -9  -6  -8  287.05   34.99
  -9  -6  -8  189.90   28.41
  -9   6  -8  261.74   31.06
  10  -7  -8   56.71   18.79
  10  -7  -8   65.44   18.27
  10   7  -8  116.11   21.15
   9  -7  -8    2.36   11.97
   9  -7  -8    1.73   13.30
   9   7  -8    9.17   12.64
   8  -7  -8   60.86   15.34
   8  -7  -8   49.46   15.58
   8   7  -8   40.14   13.53
   7  -7  -8   18.73   11.34
   7  -7  -8   33.63   12.80
   7   7  -8   20.23    9.85
   7   7  -8   26.30   11.19
  -6  -7   8    4.81    7.13
   6  -7  -8    0.80    9.03
   6  -7  -8    7.12   10.51
   6   7  -8    4.74    8.43
   6   7  -8    1.52    8.99
   5  -7  -8   13.23   10.29
   5  -7  -8   34.32   10.96
  -5  -7   8   16.18    7.08
   5   7  -8   20.62    8.99
  -5   7   8   23.50    9.88
   5   7  -8   10.43    8.17
  -4  -7   8   27.46    7.74
   4  -7  -8   16.60   10.40
   4  -7  -8   13.68    9.54
  -4   7   8   20.68    9.46
   4   7  -8   30.11    9.11
   4   7  -8   14.53    8.39
  -3  -7   8    3.58    5.12
   3  -7  -8   -1.09    7.61
   3  -7  -8   -2.54    7.82
   3   7  -8    8.16    4.03
  -3   7   8   -8.50    6.61
   3   7  -8   -2.57    6.78
   3   7  -8   -5.32    6.99
   2  -7  -8   13.17    8.68
  -2  -7   8    2.15    5.00
   2  -7  -8   -0.02    7.27
  -2   7   8   -1.98    6.87
  -2   7   8    9.77    7.12
   2   7  -8   18.03    6.97
   1  -7  -8   29.45    8.58
  -1  -7   8   33.26    6.89
   1  -7  -8   27.14    8.68
  -1   7   8   19.69    8.10
   1   7  -8   16.32    7.13
   1   7  -8   33.42    6.35
  -1   7   8   26.42    8.14
   0  -7  -8   92.03   12.35
   0  -7  -8   67.00   11.90
   0   7   8  129.31   14.31
   0   7  -8   78.47   10.83
   0   7   8   97.63   12.95
  -1  -7  -8  136.10   15.30
  -1  -7  -8  156.67   16.86
  -1  -7  -8  118.63   17.97
   1   7   8  135.80   15.88
  -1   7  -8  139.18   14.51
   1   7   8  148.43   16.43
  -2  -7  -8  183.92   17.14
  -2  -7  -8  153.18   17.65
  -2  -7  -8  166.77   21.08
   2   7   8  146.67   18.48
  -2   7  -8  145.30   16.06
   2   7   8  139.80   17.12
  -3  -7  -8    2.11   10.52
  -3  -7  -8    4.50    8.26
   3   7   8    8.97    8.76
  -3   7  -8    9.25    8.02
   3   7   8    1.54    7.33
  -4  -7  -8   64.68   15.45
  -4  -7  -8   37.95   11.90
   4   7   8   49.97   11.08
  -4   7  -8   70.47   12.93
   4   7   8   53.21   12.05
  -5  -7  -8    1.28   11.57
  -5  -7  -8   -1.06    9.58
  -5   7  -8   -5.54    9.92
  -6  -7  -8    7.24   11.12
  -6  -7  -8   20.49   14.49
  -6   7  -8    2.73   11.15
  -7  -7  -8   58.86   18.05
  -7  -7  -8   59.25   15.33
  -7   7  -8   37.86   14.54
  -8  -7  -8   26.39   16.86
  -8  -7  -8   37.00   15.00
  -8   7  -8   42.59   16.10
  10  -8  -8   17.17   14.97
  10  -8  -8   16.43   15.56
  10   8  -8  -20.25   12.01
   9  -8  -8   39.45   17.33
   9  -8  -8   65.75   16.62
   9   8  -8   41.66   15.94
   8  -8  -8   30.57   13.60
   8  -8  -8   32.23   14.66
   8   8  -8   31.31   13.08
   7  -8  -8   22.57   12.64
   7  -8  -8   40.08   12.90
   7   8  -8   36.33   11.97
   6  -8  -8    1.70   10.49
  -6  -8   8   -1.97    6.30
   6  -8  -8    5.29   10.19
   6   8  -8    5.20    8.06
   6   8  -8    1.54    9.08
  -5  -8   8   26.62    8.59
   5  -8  -8   58.12   13.89
   5  -8  -8   26.11   10.81
   5   8  -8   18.93    9.98
   5   8  -8   54.06   10.41
  -4  -8   8   -3.75    5.73
   4  -8  -8   -5.14    8.29
   4  -8  -8    6.79   10.09
  -4   8   8    0.16    8.95
   4   8  -8   -0.37    7.78
   4   8  -8   -0.43    8.25
   3  -8  -8   22.47    9.17
   3  -8  -8    8.85    8.97
  -3  -8   8   21.89    7.04
   3   8  -8   27.03    9.23
  -3   8   8    7.21    8.55
   2  -8  -8   16.40    8.68
  -2  -8   8   19.94    6.76
   2  -8  -8   22.35    9.27
  -2   8   8   25.09    9.52
   2   8  -8   20.55    8.32
  -2   8   8   24.39    8.98
  -1  -8   8   31.67    7.30
   1  -8  -8   19.36    8.01
   1  -8  -8    6.60    8.11
   1   8  -8   15.86    7.99
  -1   8   8   26.39    8.95
  -1   8   8   22.99    8.70
   0  -8  -8    5.09    7.91
   0  -8  -8    3.11    6.64
   0   8  -8    4.67    6.68
   0   8   8   -4.83    7.27
   0   8   8    6.91    7.24
  -1  -8  -8   77.59   11.37
  -1  -8  -8   88.16   14.22
   1   8   8   89.40   13.37
  -1   8  -8   81.95   12.13
   1   8   8   68.19   12.11
  -2  -8  -8   11.04   10.42
  -2  -8  -8    6.17    6.33
  -2  -8  -8    9.80    8.98
  -2   8  -8  -16.46    6.99
   2   8   8   17.07    9.15
   2   8   8    8.14    8.46
  -3  -8  -8   11.64    9.40
  -3  -8  -8   18.82   11.16
   3   8   8    0.02    7.83
   3   8   8    2.88    9.51
  -3   8  -8    3.32    8.32
  -4  -8  -8   -6.86    8.97
  -4  -8  -8   -2.22   11.39
  -4   8  -8   12.59    9.52
   4   8   8   -2.80    7.66
   4   8   8    2.46   10.36
  -5  -8  -8   17.87   13.18
  -5  -8  -8   16.44   11.41
  -5   8  -8    1.26   10.35
  -6  -8  -8    0.81   10.46
  -6  -8  -8    4.10   13.74
  -6   8  -8    3.52   11.82
  -7  -8  -8   24.30   15.27
  -7  -8  -8  -11.66   11.43
  -7   8  -8    2.14   12.54
  -8  -8  -8   13.24   13.40
  -8  -8  -8   20.98   16.67
  -8   8  -8  -20.39   12.99
   9  -9  -8  -14.35   12.40
   9  -9  -8   15.40   14.11
   9   9  -8   -5.69   12.37
   8  -9  -8   88.82   18.32
   8  -9  -8   74.20   18.29
   8   9  -8   53.34   15.71
   7  -9  -8  287.24   32.20
   7  -9  -8  342.72   34.07
   7   9  -8  357.54   30.98
   6  -9  -8   57.41   14.42
   6  -9  -8   55.41   14.91
   6   9  -8   53.07   13.59
   5  -9  -8   30.43   11.57
  -5  -9   8   27.87    9.52
   5  -9  -8   27.57   11.89
   5   9  -8   26.29   10.82
   5   9  -8   39.57   10.40
   4  -9  -8  518.22   40.41
  -4  -9   8  557.22   40.34
   4  -9  -8  539.27   40.31
  -4   9   8  478.56   39.88
   4   9  -8  509.53   38.99
   3  -9  -8  173.61   20.41
  -3  -9   8  171.92   18.00
   3  -9  -8  150.62   18.90
  -3   9   8  138.49   18.70
   3   9  -8  176.09   19.09
   2  -9  -8  213.40   21.65
  -2  -9   8  213.19   19.83
   2  -9  -8  195.35   21.39
  -2   9   8  217.52   22.15
  -2   9   8  195.78   21.28
   2   9  -8  224.87   21.03
  -1  -9   8  292.68   24.64
   1  -9  -8  296.53   27.47
   1  -9  -8  260.82   23.34
   1   9  -8  279.78   23.88
  -1   9   8  269.91   25.05
  -1   9   8  328.14   27.29
   0  -9  -8  233.12   20.98
   0  -9  -8  251.89   23.98
   0   9   8  286.66   26.48
   0   9  -8  234.66   21.82
   0   9   8  209.22   23.01
  -1  -9  -8    9.57    6.61
  -1  -9  -8   12.36    9.37
   1   9   8    8.58    8.48
  -1   9  -8   -0.59    7.91
   1   9   8    9.16    9.18
  -2  -9  -8   -7.90    9.22
  -2  -9  -8    6.31    8.55
  -2  -9  -8   -7.04    5.39
   2   9   8  -11.95    7.69
   2   9   8   -8.42    8.17
  -2   9  -8  -10.00    7.99
  -3  -9  -8  153.12   21.14
  -3  -9  -8  124.78   17.75
   3   9   8  103.20   15.61
   3   9   8  119.86   17.81
  -3   9  -8  121.01   16.49
  -4  -9  -8  141.97   21.34
  -4  -9  -8  126.69   18.83
  -4   9  -8  146.74   18.53
  -5  -9  -8   17.11   14.01
  -5  -9  -8    5.54   10.77
  -5   9  -8   15.43   11.19
  -6  -9  -8   80.16   17.29
  -6  -9  -8   91.17   20.26
  -6   9  -8   81.31   17.17
  -7  -9  -8  148.89   23.47
  -7  -9  -8  164.03   26.60
  -7   9  -8  206.42   25.82
  -8  -9  -8    4.71   15.64
  -8  -9  -8    1.75   13.25
  -8   9  -8  -13.13   12.26
   9 -10  -8    7.30   14.23
   9 -10  -8    1.13   13.70
   9  10  -8   -2.71   12.30
   8 -10  -8    3.41   12.37
   8 -10  -8    1.88   14.22
   8  10  -8  -10.93   11.13
   7 -10  -8    2.56   12.32
   7 -10  -8   -8.08   10.95
   7  10  -8    3.26   11.33
   6 -10  -8   19.83   11.88
   6 -10  -8   54.22   14.32
   6  10  -8   20.56   12.26
  -5 -10   8   45.22   10.92
   5 -10  -8   54.66   14.60
   5 -10  -8   41.07   13.30
   5  10  -8   49.75   13.09
   4 -10  -8   15.30   10.56
   4 -10  -8    1.52    9.84
  -4 -10   8    3.30    7.04
   4  10  -8    0.95    9.63
   3 -10  -8   23.81   10.22
  -3 -10   8    5.88    6.75
   3 -10  -8    9.66    9.38
   3  10  -8   -9.34    8.09
  -3  10   8    8.95   10.36
  -3  10   8    6.31   10.01
  -2 -10   8  255.26   23.71
   2 -10  -8  232.55   24.27
   2 -10  -8  272.74   26.88
   2  10  -8  277.29   24.98
  -2  10   8  245.44   25.76
  -2  10   8  302.88   28.48
  -1 -10   8   14.68    7.99
   1 -10  -8    9.24    7.49
   1 -10  -8    9.19    9.11
  -1  10   8   -0.35    8.80
   1  10  -8   28.69   10.14
  -1  10   8   14.55    9.46
   0 -10  -8   90.59   12.54
   0 -10  -8   56.15   13.50
   0  10   8   79.44   14.42
   0  10   8   92.77   15.52
   0  10  -8   70.11   12.68
  -1 -10  -8   -0.62    9.11
  -1 -10  -8   -8.68    5.17
   1  10   8   -9.27    7.12
  -1  10  -8    5.64    8.88
   1  10   8   -8.72    8.48
  -2 -10  -8  194.87   22.39
  -2 -10  -8  191.87   17.70
   2  10   8  167.42   20.46
  -2  10  -8  135.26   18.53
  -3 -10  -8  -15.25   10.83
  -3 -10  -8   -6.48    9.59
  -3  10  -8    7.05   10.14
   3  10   8   14.61   12.26
  -4 -10  -8   19.03   12.09
  -4 -10  -8   21.94   13.78
  -4  10  -8    3.91    9.33
  -5 -10  -8   96.91   19.43
  -5 -10  -8   56.18   15.27
  -5  10  -8   76.47   15.53
  -6 -10  -8   85.13   18.27
  -6 -10  -8   74.94   19.23
  -6  10  -8   80.91   17.37
  -7 -10  -8   -3.95   14.83
  -7 -10  -8   17.03   14.23
  -7  10  -8   12.86   13.28
   8 -11  -8   24.45   14.29
   8 -11  -8   -1.67   13.57
   8  11  -8   -3.99   12.02
   7 -11  -8   78.56   17.08
   7 -11  -8   55.50   16.98
   7  11  -8   67.19   17.01
   6 -11  -8   59.16   15.87
   6 -11  -8   73.54   17.44
   6  11  -8   64.00   15.52
   5 -11  -8   93.77   17.66
   5 -11  -8  138.79   20.32
   5  11  -8  172.72   21.39
   4 -11  -8   61.70   14.53
  -4 -11   8   71.46   12.95
   4 -11  -8   50.10   14.18
   4  11  -8   65.11   13.97
   3 -11  -8    8.18    9.10
   3 -11  -8    9.54    9.87
  -3 -11   8   -0.42    7.55
   3  11  -8   -0.49    9.68
   2 -11  -8   18.08    9.01
   2 -11  -8   -4.27    9.38
  -2 -11   8    0.27    7.40
  -2  11   8   20.77   11.22
   2  11  -8   26.79   11.11
   1 -11  -8  122.00   14.83
  -1 -11   8   95.91   14.52
   1 -11  -8   98.61   16.40
   1  11  -8  110.24   15.82
  -1  11   8   97.26   17.27
   0 -11  -8    0.42    9.31
   0 -11  -8   12.84    7.30
   0  11   8   10.56   10.91
   0  11  -8    0.94    9.37
  -1 -11  -8    8.55    7.00
  -1 -11  -8   -4.60    9.21
   1  11   8    5.56   10.35
  -1  11  -8   -6.99    8.65
  -2 -11  -8   29.52   11.63
   2  11   8   33.36   12.55
  -2  11  -8   22.28   11.36
  -3 -11  -8  -12.72    9.45
  -3  11  -8   -5.51    9.91
  -4 -11  -8   12.64   12.09
  -4  11  -8   -8.49   10.41
  -5 -11  -8   56.84   16.34
  -5 -11  -8   38.71   16.07
  -5  11  -8   26.95   12.98
  -6 -11  -8   17.75   13.69
  -6 -11  -8   11.00   15.25
  -6  11  -8   -1.73   11.76
  -7 -11  -8   51.00   18.40
  -7 -11  -8   36.39   16.71
  -7  11  -8   40.26   16.49
   8 -12  -8    2.77   13.78
   8 -12  -8    3.75   14.03
   8  12  -8   14.94   13.69
   7 -12  -8    0.99   13.45
   7 -12  -8  -15.82   11.29
   7  12  -8   -1.06   12.04
   6 -12  -8  180.44   23.73
   6 -12  -8  165.68   24.86
   6  12  -8  174.67   24.25
   5 -12  -8  185.58   25.32
   5 -12  -8  198.13   24.96
   5  12  -8  247.73   26.59
   4 -12  -8   18.48   11.14
   4 -12  -8    8.55   11.86
   4  12  -8    6.47   11.65
   3 -12  -8   14.31    9.90
   3 -12  -8    8.89   10.56
   3  12  -8   13.65   10.70
   2 -12  -8    7.15   10.39
  -2 -12   8   13.77    8.23
   2 -12  -8    7.39    8.34
   2  12  -8    6.59   10.72
   1 -12  -8  385.47   36.27
  -1 -12   8  413.30   33.31
   1 -12  -8  374.58   30.18
  -1  12   8  429.41   40.36
   1  12  -8  366.56   32.36
   0 -12  -8    8.05   10.58
   0 -12  -8    5.53    6.74
   0  12   8   -1.36   11.47
   0  12  -8   18.30   10.49
  -1 -12  -8   87.59   17.10
  -1  12  -8  102.77   16.31
  -2 -12  -8   96.27   17.89
  -2  12  -8  116.18   17.82
  -3 -12  -8   58.37   15.73
  -3  12  -8   56.98   14.51
  -4 -12  -8   41.91   14.40
  -4  12  -8   41.89   13.98
  -5 -12  -8  358.47   34.87
  -5  12  -8  250.65   29.78
  -6 -12  -8   42.61   17.14
  -6 -12  -8   44.44   17.83
  -6  12  -8   53.55   16.06
   7 -13  -8    5.79   13.36
   7 -13  -8    5.17   14.74
   7  13  -8  -10.88   12.82
   6 -13  -8   -3.41   12.69
   6 -13  -8   -2.08   10.94
   6  13  -8   -6.19   12.41
   5 -13  -8   24.52   14.05
   5 -13  -8   -2.28   11.10
   5  13  -8  -16.40   11.39
   4 -13  -8   65.82   14.78
   4 -13  -8   79.12   18.27
   4  13  -8  104.70   17.79
   3 -13  -8   32.88   11.21
   3 -13  -8   27.00   13.50
   3  13  -8   32.47   14.06
   2 -13  -8   36.76   13.48
   2 -13  -8   21.92    9.41
   2  13  -8   13.26   12.21
   1 -13  -8   83.70   12.77
   1 -13  -8   63.46   14.81
   1  13  -8   66.65   15.15
   0 -13  -8  279.03   30.31
   0  13  -8  265.86   27.62
  -1 -13  -8   15.16   12.60
  -1  13  -8    7.19   11.34
  -2 -13  -8   47.31   15.00
  -2  13  -8   41.32   13.37
  -3 -13  -8   30.47   14.43
  -3  13  -8   30.80   13.67
  -4 -13  -8   74.49   18.10
  -4  13  -8   70.17   16.89
  -5 -13  -8   20.14   14.37
  -5  13  -8   -9.43   11.13
   6 -14  -8   -7.45   13.89
   6 -14  -8  -12.52   10.59
   6  14  -8    1.34   13.31
   5 -14  -8   -0.04   10.71
   5 -14  -8   27.06   15.64
   5  14  -8    9.20   12.95
   4 -14  -8   27.72   11.56
   4 -14  -8   25.62   14.61
   4  14  -8    7.90   12.72
   3 -14  -8    0.30   11.96
   3 -14  -8   21.16   10.61
   3  14  -8   -3.08   11.89
   2 -14  -8   13.85    9.17
   2 -14  -8   21.34   12.90
   2  14  -8   -6.65   11.37
   1 -14  -8    3.80   11.52
   1  14  -8   26.05   12.43
   0 -14  -8  -13.82   11.52
   0  14  -8   -0.22   11.69
  -1 -14  -8   -5.37   11.67
  -1  14  -8    9.55   11.73
  -2 -14  -8   -5.19   11.53
  -2  14  -8    9.10   12.19
  -3 -14  -8   19.62   14.20
  -3  14  -8   60.66   15.96
  -4 -14  -8    3.76   14.62
  -4  14  -8    5.00   13.00
  -5 -14  -8    9.15   13.69
  -5  14  -8   27.84   13.93
   5 -15  -8    1.62   14.60
   5 -15  -8  -17.72   10.48
   5  15  -8    4.35   13.85
   4 -15  -8   28.83   12.07
   4 -15  -8   -7.30   13.57
   4  15  -8   11.82   14.75
   3 -15  -8  176.08   21.35
   3 -15  -8  209.38   27.54
   3  15  -8  179.33   25.65
   2 -15  -8   16.84   13.48
   2  15  -8   14.82   14.17
   1 -15  -8   76.16   18.24
   1  15  -8   63.59   16.76
   0 -15  -8   88.68   19.00
   0  15  -8   25.16   14.20
  -1 -15  -8  176.82   25.46
  -1  15  -8  140.02   21.42
  -2 -15  -8   26.45   15.42
  -2  15  -8   18.23   12.90
  -3 -15  -8   57.33   17.25
  -3  15  -8   30.93   15.59
   4 -16  -8    2.14    9.40
   3 -16  -8   28.63   15.70
   3  16  -8    1.42   13.88
   2 -16  -8   26.45   15.70
   2  16  -8   59.39   16.77
   1 -16  -8   12.30   13.92
   1  16  -8   15.91   14.12
   0 -16  -8    1.55   13.19
   0  16  -8   24.88   14.00
  -1 -16  -8   38.97   16.20
  -1  16  -8   76.14   17.38
  -2 -16  -8   33.40   17.11
  -2  16  -8   90.02   18.56
  11   0  -9    0.18   12.58
  11   0  -9   -0.05   12.95
  10   0  -9   -4.60   12.11
  10   0  -9    8.54   12.56
   9   0  -9    2.19   11.14
   9   0  -9    2.66   10.66
   8   0  -9   -2.11   10.39
   8   0  -9   -5.51    9.15
   7   0  -9   -2.46   10.21
   7   0  -9   -0.28    8.57
   6   0  -9   -4.37    7.40
   6   0  -9    7.59   10.22
   5   0  -9    0.37    6.10
   5   0  -9   -2.99    8.60
   4   0  -9   -0.45    5.13
   4   0  -9   -6.42    4.12
   4   0  -9  -13.63    8.07
   3   0  -9    2.19    8.42
   3   0  -9    2.91    4.12
   3   0  -9    6.65    4.07
   2   0  -9   -0.88    2.89
   2   0  -9    4.27    7.83
   2   0  -9    5.63    3.05
   2   0  -9    1.55    7.34
   1   0  -9   -0.64    7.21
   1   0  -9    0.75    7.83
   0   0  -9   19.79    8.68
   0   0  -9   -3.03    7.72
   0   0  -9   -0.31    3.07
   0   0   9    4.09    2.60
   0   0  -9   -1.15    2.67
  -1   0  -9    0.76    4.08
  -1   0  -9   -6.30    7.68
  -1   0  -9    0.43    3.31
   1   0   9    3.39    3.46
  -2   0  -9   -4.78    5.12
   2   0   9   -3.90    4.17
  -2   0  -9    2.04    5.29
  -2   0  -9   -4.32    3.30
   2   0   9   -0.39    4.39
  -3   0  -9    6.78    6.22
   3   0   9    5.75    5.87
  -4   0  -9    6.70    7.50
   4   0   9   -0.97    6.01
  -5   0  -9   -3.49    7.85
  -6   0  -9   -3.29    9.36
  -7   0  -9   -0.54    9.94
  -8   0  -9   -4.27   10.47
  -9   0  -9   13.35   12.74
  11  -1  -9   13.73   14.23
  11  -1  -9    4.44   13.04
  11   1  -9   17.25   14.28
  11   1  -9    3.35   12.85
  10  -1  -9  116.10   20.15
  10  -1  -9  107.44   19.63
  10   1  -9  121.54   19.60
  10   1  -9  122.69   20.59
   9  -1  -9  121.70   19.86
   9  -1  -9  142.86   19.74
   9   1  -9  131.17   19.47
   9   1  -9   97.73   18.02
   8  -1  -9   49.65   12.62
   8  -1  -9   18.72   12.00
   8   1  -9   26.15   11.51
   8   1  -9   35.76   12.62
   7  -1  -9  -14.60    7.81
   7  -1  -9    4.22   10.73
   7   1  -9    1.92    8.46
   7   1  -9   -9.36    9.92
   6  -1  -9   92.85   13.29
   6  -1  -9   72.55   14.99
   6   1  -9   88.80   12.41
   6   1  -9   71.60   13.93
   5  -1  -9  147.51   15.86
   5  -1  -9  128.29   17.60
   5   1  -9  164.23   15.83
   5   1  -9  205.17   20.70
   4  -1  -9  127.53   12.84
   4  -1  -9  168.03   18.80
   4  -1  -9  135.46   13.33
   4   1  -9  137.53   12.88
   4   1  -9  133.81   16.27
   4   1  -9  134.50   12.10
   3  -1  -9   -5.26    8.00
   3  -1  -9   -1.16    3.80
   3  -1  -9    3.98    4.86
   3   1  -9    4.54    3.69
   3   1  -9    2.49    3.71
   3   1  -9   -5.69    7.73
   2  -1  -9  419.54   27.95
   2  -1  -9  442.82   34.00
   2  -1  -9  413.63   27.93
   2  -1  -9  454.46   32.92
   2   1  -9  448.86   33.01
   2   1  -9  437.18   32.36
   1  -1  -9  424.91   32.76
   1  -1  -9  436.74   27.90
   1  -1  -9  458.94   28.15
   1  -1  -9  449.91   34.63
   1   1  -9  391.80   32.04
   1   1  -9  425.77   33.96
   0  -1  -9  179.36   21.04
   0  -1   9  205.36   14.14
   0  -1  -9  200.24   14.62
   0  -1  -9  199.53   19.55
   0  -1  -9  206.90   14.56
   0   1  -9  172.02   19.69
   0   1  -9  206.38   20.72
   0   1   9  199.95   15.40
  -1  -1  -9  240.16   22.95
  -1  -1  -9  251.48   18.59
  -1  -1  -9  251.60   24.21
  -1  -1  -9  260.50   18.30
   1  -1   9  245.55   18.80
  -1   1  -9  257.18   17.74
  -1   1  -9  266.29   17.52
  -1   1  -9  278.81   17.97
   1   1   9  213.38   19.28
  -2  -1  -9  211.71   17.50
  -2  -1  -9  211.59   16.63
   2  -1   9  200.73   17.35
  -2  -1  -9  182.98   21.69
   2   1   9  220.33   16.55
  -2   1  -9  231.78   16.27
   2   1   9  198.85   18.00
  -2   1  -9  216.66   16.90
  -3  -1  -9   33.17    8.77
  -3  -1  -9   73.87   10.58
   3   1   9   67.29    9.98
  -3   1  -9   59.05    9.66
  -4  -1  -9   15.72    8.09
  -4  -1  -9   20.50    8.92
  -4   1  -9   43.14    9.77
   4   1   9   28.34    8.36
  -5  -1  -9   -6.34    7.74
  -5  -1  -9   -3.03    7.95
  -5   1  -9    1.24    8.32
   5   1   9   -0.33    7.44
  -6  -1  -9  238.10   25.08
  -6  -1  -9  267.15   26.15
  -6   1  -9  270.12   26.06
  -7  -1  -9   -0.74    9.77
  -7  -1  -9   -8.29    8.80
  -7   1  -9    0.88   10.12
  -8  -1  -9   20.58   13.00
  -8  -1  -9   12.70   11.76
  -8   1  -9   16.07   11.75
  -9  -1  -9    2.01   12.15
  -9  -1  -9   18.35   12.77
  -9   1  -9   12.02   13.15
  11  -2  -9   78.96   19.84
  11  -2  -9   73.18   19.48
  11   2  -9   94.21   18.89
  11   2  -9  105.31   20.81
  10  -2  -9  142.56   21.85
  10  -2  -9  130.33   21.57
  10   2  -9  169.14   21.44
  10   2  -9  152.29   22.70
   9  -2  -9   49.16   14.09
   9  -2  -9    8.12   12.71
   9   2  -9    4.63   11.40
   9   2  -9   29.26   12.42
   8  -2  -9   92.94   15.43
   8  -2  -9   83.03   15.45
   8   2  -9   64.02   13.77
   8   2  -9   87.81   15.98
  -7  -2   9  237.38   21.52
   7  -2  -9  161.42   21.44
   7  -2  -9  171.69   20.31
   7   2  -9  191.38   22.25
   7   2  -9  168.78   19.52
  -6  -2   9  130.30   15.45
   6  -2  -9  161.70   20.18
   6  -2  -9  188.79   18.90
   6   2  -9  181.03   18.06
   6   2  -9  156.87   19.12
   5  -2  -9   27.53    8.47
   5  -2  -9   56.53   12.96
   5   2  -9   29.08    7.83
   5   2  -9   33.06   11.51
   4  -2  -9  776.73   53.05
   4  -2  -9  755.22   49.99
   4   2  -9  771.53   52.35
   4   2  -9  757.54   49.04
   4   2  -9  772.43   49.02
   3  -2  -9  513.36   32.64
   3  -2  -9  458.45   32.40
   3   2  -9  466.24   31.06
   3   2  -9  497.95   35.28
   3   2  -9  465.31   31.14
  -3   2   9  501.30   31.85
   3   2  -9  519.85   36.25
   2  -2  -9  174.56   19.07
   2  -2  -9  184.82   13.62
   2  -2  -9  161.01   17.42
   2  -2  -9  158.95   13.64
   2   2  -9  159.02   18.60
   2   2  -9  174.96   17.48
   1  -2  -9   10.95    4.47
   1  -2  -9   11.23    4.48
   1  -2  -9   16.94    8.89
   1  -2  -9   14.43    7.94
  -1   2   9   15.91    4.49
   1   2  -9   21.15    8.23
   1   2  -9    3.70    8.28
   0  -2   9  255.46   18.14
   0  -2  -9  268.54   18.96
   0  -2  -9  279.66   24.76
   0  -2  -9  268.71   19.00
   0  -2  -9  274.54   24.99
   0   2  -9  289.83   24.55
   0   2   9  256.28   20.14
  -1  -2  -9  294.58   20.71
  -1  -2  -9  256.93   23.89
  -1  -2  -9  273.65   26.11
  -1  -2  -9  271.05   20.77
   1   2   9  297.97   22.12
   1   2   9  269.31   19.94
  -1   2  -9  279.63   19.53
  -1   2  -9  290.25   19.20
  -2  -2  -9   63.60   14.13
  -2  -2  -9   77.20   10.52
  -2   2  -9   96.68    9.84
   2   2   9   99.11   11.02
   2   2   9   92.65   10.34
  -2   2  -9   84.36   10.05
  -3  -2  -9   75.37   14.59
  -3  -2  -9   92.13   12.28
   3   2   9   97.09   12.31
  -3   2  -9  103.41   12.27
  -4  -2  -9  811.85   58.10
   4   2   9  909.18   62.49
  -4   2  -9  887.22   58.13
  -5  -2  -9   34.17   10.82
  -5  -2  -9   36.65   10.82
   5   2   9   30.51    9.98
  -5   2  -9   23.79   10.18
  -6  -2  -9  146.92   19.34
  -6  -2  -9  143.27   18.75
  -6   2  -9  151.85   19.45
   6   2   9  171.64   19.82
  -7  -2  -9   31.73   12.68
  -7  -2  -9   43.37   13.43
  -7   2  -9   42.13   13.43
  -8  -2  -9   76.97   16.86
  -8  -2  -9   64.06   15.90
  -8   2  -9   91.00   17.44
  -9  -2  -9    0.37   11.17
  -9  -2  -9    5.71   12.52
  -9   2  -9   -5.54   11.94
  11  -3  -9   12.50   13.94
  11  -3  -9    0.61   14.13
  11   3  -9   -1.72   13.95
  11   3  -9   13.74   14.15
  10  -3  -9    6.08   13.25
  10  -3  -9   -2.26   13.25
  10   3  -9  -15.22   12.14
  10   3  -9    0.76   11.15
   9  -3  -9   12.59   11.70
   9  -3  -9   10.57   12.73
   9   3  -9   27.89   12.42
   9   3  -9    4.36   11.47
   8  -3  -9   22.15   11.45
   8  -3  -9   11.13   10.61
   8   3  -9   11.13   10.29
   8   3  -9   21.89   11.59
   7  -3  -9    0.25   10.83
   7  -3  -9    3.92    9.16
  -7  -3   9    3.55    6.39
   7   3  -9   -1.87    8.70
   7   3  -9    3.29    8.69
   6  -3  -9   21.46    8.85
  -6  -3   9    3.48    6.11
   6  -3  -9   20.34   11.48
   6   3  -9   25.36   10.15
   6   3  -9   16.96    8.42
   5  -3  -9   39.04   12.39
   5  -3  -9   48.47   10.09
  -5  -3   9   54.46    8.42
   5   3  -9   51.54   12.03
   5   3  -9   51.98    9.43
  -4  -3   9   13.50    5.00
   4  -3  -9    6.76    9.43
   4  -3  -9   28.26    7.57
   4   3  -9   20.02    9.38
   4   3  -9   13.49    5.29
   4   3  -9   10.85    5.94
   3  -3  -9   -1.00    5.32
   3  -3  -9    8.21    8.34
  -3  -3   9    5.02    3.32
   3  -3  -9   -0.34    4.91
   3   3  -9   -1.06    5.30
   3   3  -9    6.27    4.19
   3   3  -9    5.30    3.96
  -3   3   9  -10.82    4.20
   3   3  -9   -7.68    7.90
   2  -3  -9    8.38    7.92
  -2  -3   9    0.85    2.28
   2  -3  -9    9.41    4.62
   2  -3  -9    3.35    5.09
   2   3  -9   -2.85    7.98
   2   3  -9   -0.57    2.81
   2   3  -9   -0.92    5.88
  -2   3   9   -3.76    4.01
   1  -3  -9   31.24    6.23
   1  -3  -9   19.41    5.87
   1  -3  -9   18.16    9.14
   1  -3  -9   20.08   10.14
  -1   3   9   35.34    6.28
   1   3  -9   28.45    9.52
  -1   3   9   17.73    4.93
   1   3  -9   34.48    8.26
   0  -3  -9   28.76    6.41
[truncated: 170,534 more chars]
