# Supplementary material
Source: MDPI journal article supplement (https://www.mdpi.com/2624-8549/1/1/9)
Supplement: s1 [file s1 › 3_final CCDC 1935231.cif]

 
data_CAN_3
 
_audit_creation_method            'SHELXL-2017/1'
_chemical_name_systematic
;
 ?
;
_chemical_name_common             ?
_chemical_melting_point           ?
_chemical_formula_moiety          ?
_chemical_formula_sum
 'C27 H23 N3 O5 Zn' 
_chemical_formula_weight          534.85

loop_
 _atom_type_symbol
 _atom_type_description
 _atom_type_scat_dispersion_real
 _atom_type_scat_dispersion_imag
 _atom_type_scat_source
 'C'  'C'   0.0033   0.0016
 'International Tables Vol C Tables 4.2.6.8 and 6.1.1.4'
 'H'  'H'   0.0000   0.0000
 'International Tables Vol C Tables 4.2.6.8 and 6.1.1.4'
 'N'  'N'   0.0061   0.0033
 'International Tables Vol C Tables 4.2.6.8 and 6.1.1.4'
 'O'  'O'   0.0106   0.0060
 'International Tables Vol C Tables 4.2.6.8 and 6.1.1.4'
 'Zn'  'Zn'   0.2839   1.4301
 'International Tables Vol C Tables 4.2.6.8 and 6.1.1.4'
 
_space_group_crystal_system       monoclinic
_space_group_IT_number            14
_space_group_name_H-M_alt         'P 21/c'
_space_group_name_Hall            '-P 2ybc'
 
_shelx_space_group_comment
;
The symmetry employed for this shelxl refinement is uniquely defined
by the following loop, which should always be used as a source of
symmetry information in preference to the above space-group names.
They are only intended as comments.
;
 
loop_
 _space_group_symop_operation_xyz
 'x, y, z'
 '-x, y+1/2, -z+1/2'
 '-x, -y, -z'
 'x, -y-1/2, z-1/2'
 
_cell_length_a                    9.3389(15)
_cell_length_b                    17.677(3)
_cell_length_c                    14.735(3)
_cell_angle_alpha                 90
_cell_angle_beta                  93.189(5)
_cell_angle_gamma                 90
_cell_volume                      2428.8(7)
_cell_formula_units_Z             4
_cell_measurement_temperature     173(2)
_cell_measurement_reflns_used     22013 
_cell_measurement_theta_min       1.801
_cell_measurement_theta_max       27.579
 
_exptl_crystal_description        block 
_exptl_crystal_colour             colourless
_exptl_crystal_density_meas       none
_exptl_crystal_density_method     'not measured'           
_exptl_crystal_density_diffrn     1.463          
_exptl_crystal_F_000              1104
_exptl_transmission_factor_min    0.909                                             
_exptl_transmission_factor_max    0.969                                         
_exptl_crystal_size_max           0.090
_exptl_crystal_size_mid           0.030
_exptl_crystal_size_min           0.030
_exptl_absorpt_coefficient_mu     1.055
_shelx_estimated_absorpt_T_min    ? 
_shelx_estimated_absorpt_T_max    ? 
_exptl_absorpt_correction_type    multi-scan
_exptl_absorpt_correction_T_min   ? 
_exptl_absorpt_correction_T_max   ? 
_exptl_absorpt_process_details    'SADABS; Sheldrick, 1996'
 
_exptl_special_details
;
 ?
;
 
_diffrn_ambient_temperature       173(2)
_diffrn_radiation_wavelength      0.71073
_diffrn_radiation_type            MoK\a
_diffrn_source                    'fine-focus sealed tube'
_diffrn_measurement_device_type   'Bruker Kappa Duo Apex II diffractometer'
_diffrn_measurement_method        '1.2\% \f scans and \w scans'
_diffrn_detector_area_resol_mean  ? 
_diffrn_reflns_number             22013
_diffrn_reflns_av_unetI/netI      0.0795
_diffrn_reflns_av_R_equivalents   0.0795
_diffrn_reflns_limit_h_min        -7
_diffrn_reflns_limit_h_max        12
_diffrn_reflns_limit_k_min        -22
_diffrn_reflns_limit_k_max        22
_diffrn_reflns_limit_l_min        -19
_diffrn_reflns_limit_l_max        17
_diffrn_reflns_theta_min          1.801
_diffrn_reflns_theta_max          27.579
_diffrn_reflns_theta_full         25.242
_diffrn_measured_fraction_theta_max   0.996
_diffrn_measured_fraction_theta_full  1.000
_diffrn_reflns_Laue_measured_fraction_max    0.996
_diffrn_reflns_Laue_measured_fraction_full   1.000
_diffrn_reflns_point_group_measured_fraction_max   0.996
_diffrn_reflns_point_group_measured_fraction_full  1.000
_reflns_number_total              5584
_reflns_number_gt                 3713
_reflns_threshold_expression      'I > 2\s(I)'
_reflns_Friedel_coverage          0.000
_reflns_Friedel_fraction_max      .
_reflns_Friedel_fraction_full     .
 
_reflns_special_details
;
 Reflections were merged by SHELXL according to the crystal
 class for the calculation of statistics and refinement.
 
 _reflns_Friedel_fraction is defined as the number of unique
 Friedel pairs measured divided by the number that would be
 possible theoretically, ignoring centric projections and
 systematic absences.
;
 
_computing_data_collection        'APEX2 (Bruker, 2005)'
_computing_cell_refinement        'SAINT-Plus (Bruker, 2004)'
_computing_data_reduction         'SAINT-Plus and XPREP (Bruker 2004)'
_computing_structure_solution     'SHELXT 2014/5 (Sheldrick, 2014)'
_computing_structure_refinement   'SHELXL-2017/1 (Sheldrick, 2017)'
_computing_molecular_graphics     'X-seed (Barbour, 1999)'
_computing_publication_material   'SHELXL-97 (Sheldrick, 1997)'
 
_refine_special_details
;
 ?
;
_refine_ls_structure_factor_coef  Fsqd
_refine_ls_matrix_type            full
_refine_ls_weighting_scheme       calc
_refine_ls_weighting_details
'w=1/[\s^2^(Fo^2^)+(0.0478P)^2^] where P=(Fo^2^+2Fc^2^)/3'
_atom_sites_solution_primary      ?
_atom_sites_solution_secondary    ?
_atom_sites_solution_hydrogens    geom
_refine_ls_hydrogen_treatment     constr
_refine_ls_extinction_method      none
_refine_ls_extinction_coef        .
_refine_ls_number_reflns          5584
_refine_ls_number_parameters      327
_refine_ls_number_restraints      0
_refine_ls_R_factor_all           0.0867
_refine_ls_R_factor_gt            0.0468
_refine_ls_wR_factor_ref          0.1107
_refine_ls_wR_factor_gt           0.0971
_refine_ls_goodness_of_fit_ref    1.006
_refine_ls_restrained_S_all       1.006
_refine_ls_shift/su_max           0.001
_refine_ls_shift/su_mean          0.000
 
loop_
 _atom_site_label
 _atom_site_type_symbol
 _atom_site_fract_x
 _atom_site_fract_y
 _atom_site_fract_z
 _atom_site_U_iso_or_equiv
 _atom_site_adp_type
 _atom_site_occupancy
 _atom_site_site_symmetry_order  
 _atom_site_calc_flag
 _atom_site_refinement_flags_posn
 _atom_site_refinement_flags_adp
 _atom_site_refinement_flags_occupancy
 _atom_site_disorder_assembly
 _atom_site_disorder_group
Zn01 Zn 0.86642(4) 0.58853(2) 0.51996(2) 0.01922(11) Uani 1 1 d . . . . .
N2 N 0.8336(4) 0.5734(2) 1.0323(3) 0.0637(11) Uani 1 1 d . . . . .
O1A O 1.0583(2) 0.94647(13) 0.08406(14) 0.0294(5) Uani 1 1 d . . . . .
N1A N 0.9934(3) 0.67002(15) 0.45332(17) 0.0251(6) Uani 1 1 d . . . . .
C1A C 1.1571(3) 0.98079(17) 0.1264(2) 0.0205(7) Uani 1 1 d . . . . .
O2A O 1.2050(2) 1.04444(11) 0.10321(14) 0.0245(5) Uani 1 1 d . . . . .
C2A C 1.2279(3) 0.94331(18) 0.2077(2) 0.0247(7) Uani 1 1 d . . . . .
C3A C 1.1620(3) 0.88214(17) 0.2472(2) 0.0230(7) Uani 1 1 d . . . . .
H3A H 1.0736 0.8654 0.2229 0.028 Uiso 1 1 calc R U . . .
C4A C 1.2263(3) 0.84520(19) 0.3230(2) 0.0309(8) Uani 1 1 d . . . . .
C5A C 1.3606(4) 0.8702(2) 0.3570(3) 0.0536(12) Uani 1 1 d . . . . .
H5A H 1.4057 0.8459 0.4068 0.064 Uiso 1 1 calc R U . . .
C6A C 1.4275(4) 0.9310(3) 0.3173(3) 0.0717(16) Uani 1 1 d . . . . .
H6A H 1.5174 0.9469 0.3401 0.086 Uiso 1 1 calc R U . . .
C7A C 1.3600(4) 0.9682(2) 0.2434(3) 0.0485(11) Uani 1 1 d . . . . .
H7A H 1.4038 1.0097 0.2179 0.058 Uiso 1 1 calc R U . . .
C8A C 1.1494(3) 0.78291(18) 0.3675(2) 0.0282(7) Uani 1 1 d . . . . .
C9A C 1.0581(4) 0.73513(19) 0.3191(2) 0.0336(8) Uani 1 1 d . . . . .
H9A H 1.0464 0.7396 0.2562 0.040 Uiso 1 1 calc R U . . .
C10A C 0.9835(4) 0.68037(18) 0.3639(2) 0.0305(8) Uani 1 1 d . . . . .
H10A H 0.9226 0.6487 0.3293 0.037 Uiso 1 1 calc R U . . .
C11A C 1.0863(4) 0.71490(19) 0.5004(2) 0.0335(8) Uani 1 1 d . . . . .
H11A H 1.0996 0.7077 0.5628 0.040 Uiso 1 1 calc R U . . .
C12A C 1.1631(4) 0.7713(2) 0.4605(2) 0.0372(9) Uani 1 1 d . . . . .
H12A H 1.2246 0.8018 0.4963 0.045 Uiso 1 1 calc R U . . .
O1B O 0.1603(2) 0.16444(12) 0.86129(14) 0.0269(5) Uani 1 1 d . . . . .
N1B N 0.7608(3) 0.50197(14) 0.59213(17) 0.0217(6) Uani 1 1 d . . . . .
C1B C 0.2800(3) 0.18451(18) 0.8960(2) 0.0258(7) Uani 1 1 d . . . . .
O2B O 0.3223(2) 0.16370(13) 0.97469(15) 0.0318(6) Uani 1 1 d . . . . .
C2B C 0.3751(3) 0.23358(17) 0.8416(2) 0.0257(7) Uani 1 1 d . . . . .
C3B C 0.3351(3) 0.2513(2) 0.7528(2) 0.0338(8) Uani 1 1 d . . . . .
H3B H 0.2529 0.2296 0.7255 0.041 Uiso 1 1 calc R U . . .
C4B C 0.4152(4) 0.3005(2) 0.7040(2) 0.0345(8) Uani 1 1 d . . . . .
H4B H 0.3855 0.3117 0.6442 0.041 Uiso 1 1 calc R U . . .
C5B C 0.5390(3) 0.33363(18) 0.7418(2) 0.0259(7) Uani 1 1 d . . . . .
C6B C 0.5819(4) 0.3132(2) 0.8293(3) 0.0568(13) Uani 1 1 d . . . . .
H6B H 0.6666 0.3329 0.8559 0.068 Uiso 1 1 calc R U . . .
C7B C 0.5001(4) 0.2636(3) 0.8784(3) 0.0584(13) Uani 1 1 d . . . . .
H7B H 0.5312 0.2506 0.9374 0.070 Uiso 1 1 calc R U . . .
C8B C 0.6205(3) 0.38989(17) 0.6902(2) 0.0226(7) Uani 1 1 d . . . . .
C9B C 0.5914(3) 0.40009(18) 0.5972(2) 0.0276(7) Uani 1 1 d . . . . .
H9B H 0.5247 0.3695 0.5656 0.033 Uiso 1 1 calc R U . . .
C10B C 0.6626(3) 0.45594(18) 0.5526(2) 0.0276(7) Uani 1 1 d . . . . .
H10B H 0.6407 0.4620 0.4907 0.033 Uiso 1 1 calc R U . . .
C11B C 0.7891(3) 0.49172(18) 0.6822(2) 0.0273(7) Uani 1 1 d . . . . .
H11B H 0.8568 0.5229 0.7119 0.033 Uiso 1 1 calc R U . . .
C12B C 0.7231(3) 0.43764(18) 0.7321(2) 0.0270(7) Uani 1 1 d . . . . .
H12B H 0.7468 0.4329 0.7940 0.032 Uiso 1 1 calc R U . . .
O1C O 0.7832(4) 0.4651(2) 0.9508(2) 0.0917(12) Uani 1 1 d . . . . .
C1C C 0.8261(6) 0.4983(3) 1.0202(3) 0.0725(14) Uani 1 1 d . . . . .
H1C H 0.8566 0.4683 1.0694 0.087 Uiso 1 1 calc R U . . .
C3C C 0.8892(6) 0.6048(3) 1.1180(3) 0.0813(16) Uani 1 1 d . . . . .
H2C H 0.9248 0.5646 1.1570 0.122 Uiso 1 1 calc R U . . .
H3C H 0.8139 0.6311 1.1467 0.122 Uiso 1 1 calc R U . . .
H4C H 0.9656 0.6394 1.1073 0.122 Uiso 1 1 calc R U . . .
C4C C 0.7919(7) 0.6241(3) 0.9580(4) 0.107(2) Uani 1 1 d . . . . .
H6C H 0.8580 0.6656 0.9575 0.161 Uiso 1 1 calc R U . . .
H5C H 0.6970 0.6429 0.9660 0.161 Uiso 1 1 calc R U . . .
H7C H 0.7931 0.5972 0.9015 0.161 Uiso 1 1 calc R U . . .
 
loop_
 _atom_site_aniso_label
 _atom_site_aniso_U_11
 _atom_site_aniso_U_22
 _atom_site_aniso_U_33
 _atom_site_aniso_U_23
 _atom_site_aniso_U_13
 _atom_site_aniso_U_12
Zn01 0.02414(18) 0.01641(18) 0.01741(18) -0.00058(16) 0.00386(13) 0.00049(17)
N2 0.076(3) 0.057(3) 0.055(3) -0.001(2) -0.015(2) 0.000(2)
O1A 0.0289(12) 0.0328(13) 0.0261(13) 0.0038(11) -0.0010(10) -0.0058(11)
N1A 0.0312(14) 0.0233(14) 0.0209(14) 0.0040(12) 0.0022(12) -0.0030(12)
C1A 0.0195(14) 0.0211(17) 0.0214(16) -0.0015(13) 0.0056(13) 0.0023(13)
O2A 0.0342(12) 0.0182(12) 0.0215(12) 0.0019(9) 0.0043(9) -0.0040(10)
C2A 0.0252(16) 0.0244(17) 0.0247(17) 0.0072(14) 0.0037(13) -0.0003(14)
C3A 0.0222(15) 0.0246(17) 0.0222(17) 0.0021(13) 0.0005(13) 0.0002(13)
C4A 0.0290(17) 0.0295(19) 0.034(2) 0.0103(16) 0.0011(15) -0.0045(15)
C5A 0.037(2) 0.063(3) 0.058(3) 0.039(2) -0.0197(19) -0.014(2)
C6A 0.035(2) 0.091(4) 0.086(4) 0.059(3) -0.030(2) -0.031(2)
C7A 0.036(2) 0.055(3) 0.052(3) 0.031(2) -0.0122(18) -0.0208(19)
C8A 0.0263(17) 0.0259(18) 0.0322(19) 0.0077(15) -0.0005(14) -0.0007(15)
C9A 0.050(2) 0.0288(19) 0.0222(18) 0.0042(15) 0.0030(16) -0.0087(17)
C10A 0.043(2) 0.0264(18) 0.0215(18) 0.0012(14) -0.0011(15) -0.0085(16)
C11A 0.042(2) 0.034(2) 0.0244(18) 0.0088(15) -0.0040(15) -0.0106(17)
C12A 0.040(2) 0.037(2) 0.034(2) 0.0085(17) -0.0057(16) -0.0126(17)
O1B 0.0258(11) 0.0272(12) 0.0280(13) 0.0041(10) 0.0031(10) -0.0071(10)
N1B 0.0234(13) 0.0223(14) 0.0196(14) -0.0004(11) 0.0037(11) -0.0004(11)
C1B 0.0294(18) 0.0216(17) 0.0269(19) 0.0024(14) 0.0052(15) -0.0035(14)
O2B 0.0362(13) 0.0335(14) 0.0254(13) 0.0108(11) -0.0018(10) -0.0084(11)
C2B 0.0267(16) 0.0204(17) 0.0299(18) 0.0070(14) 0.0007(14) -0.0056(14)
C3B 0.0315(19) 0.039(2) 0.030(2) 0.0059(17) -0.0032(15) -0.0153(17)
C4B 0.0379(19) 0.044(2) 0.0202(18) 0.0076(16) -0.0059(15) -0.0145(17)
C5B 0.0234(16) 0.0292(18) 0.0253(18) 0.0080(14) 0.0028(14) -0.0011(14)
C6B 0.044(2) 0.086(3) 0.038(2) 0.029(2) -0.0196(18) -0.040(2)
C7B 0.053(2) 0.088(3) 0.032(2) 0.028(2) -0.0197(18) -0.035(2)
C8B 0.0208(15) 0.0241(17) 0.0229(17) 0.0033(13) 0.0025(13) 0.0009(13)
C9B 0.0233(15) 0.0313(19) 0.0281(18) 0.0019(15) 0.0010(13) -0.0095(14)
C10B 0.0286(17) 0.033(2) 0.0208(17) 0.0017(14) 0.0008(14) -0.0030(15)
C11B 0.0283(17) 0.0289(18) 0.0243(17) -0.0021(15) 0.0001(13) -0.0091(15)
C12B 0.0292(17) 0.0302(18) 0.0213(17) 0.0050(14) -0.0012(14) -0.0033(15)
O1C 0.130(3) 0.087(3) 0.056(2) -0.023(2) -0.017(2) -0.014(2)
C1C 0.101(4) 0.066(4) 0.050(3) -0.004(3) -0.007(3) -0.007(3)
C3C 0.108(4) 0.070(4) 0.064(4) -0.026(3) -0.013(3) 0.008(3)
C4C 0.134(5) 0.083(4) 0.098(5) 0.027(4) -0.052(4) -0.012(4)
 
_geom_special_details
;
 All esds (except the esd in the dihedral angle between two l.s. planes)
 are estimated using the full covariance matrix.  The cell esds are taken
 into account individually in the estimation of esds in distances, angles
 and torsion angles; correlations between esds in cell parameters are only
 used when they are defined by crystal symmetry.  An approximate (isotropic)
 treatment of cell esds is used for estimating esds involving l.s. planes.
;
 
loop_
 _geom_bond_atom_site_label_1
 _geom_bond_atom_site_label_2
 _geom_bond_distance
 _geom_bond_site_symmetry_2
 _geom_bond_publ_flag
Zn01 O2A 2.052(2) 2_745 ?
Zn01 O1A 2.073(2) 4_576 ?
Zn01 N1B 2.136(2) . ?
Zn01 N1A 2.139(2) . ?
Zn01 O2B 2.212(2) 2_656 ?
Zn01 O1B 2.230(2) 2_656 ?
Zn01 C1B 2.544(3) 2_656 ?
N2 C1C 1.341(6) . ?
N2 C3C 1.450(6) . ?
N2 C4C 1.450(6) . ?
O1A C1A 1.243(3) . ?
O1A Zn01 2.073(2) 4_575 ?
N1A C10A 1.328(4) . ?
N1A C11A 1.340(4) . ?
C1A O2A 1.265(3) . ?
C1A C2A 1.492(4) . ?
O2A Zn01 2.052(2) 2_755 ?
C2A C7A 1.386(5) . ?
C2A C3A 1.388(4) . ?
C3A C4A 1.400(4) . ?
C3A H3A 0.9300 . ?
C4A C5A 1.397(5) . ?
C4A C8A 1.487(4) . ?
C5A C6A 1.389(5) . ?
C5A H5A 0.9300 . ?
C6A C7A 1.392(5) . ?
C6A H6A 0.9300 . ?
C7A H7A 0.9300 . ?
C8A C9A 1.372(5) . ?
C8A C12A 1.383(5) . ?
C9A C10A 1.382(4) . ?
C9A H9A 0.9300 . ?
C10A H10A 0.9300 . ?
C11A C12A 1.380(4) . ?
C11A H11A 0.9300 . ?
C12A H12A 0.9300 . ?
O1B C1B 1.254(4) . ?
O1B Zn01 2.230(2) 2_646 ?
N1B C10B 1.336(4) . ?
N1B C11B 1.350(4) . ?
C1B O2B 1.260(4) . ?
C1B C2B 1.503(4) . ?
C1B Zn01 2.544(3) 2_646 ?
O2B Zn01 2.212(2) 2_646 ?
C2B C7B 1.367(5) . ?
C2B C3B 1.376(4) . ?
C3B C4B 1.377(4) . ?
C3B H3B 0.9300 . ?
C4B C5B 1.385(4) . ?
C4B H4B 0.9300 . ?
C5B C6B 1.377(5) . ?
C5B C8B 1.486(4) . ?
C6B C7B 1.392(5) . ?
C6B H6B 0.9300 . ?
C7B H7B 0.9300 . ?
C8B C9B 1.394(4) . ?
C8B C12B 1.395(4) . ?
C9B C10B 1.377(4) . ?
C9B H9B 0.9300 . ?
C10B H10B 0.9300 . ?
C11B C12B 1.373(4) . ?
C11B H11B 0.9300 . ?
C12B H12B 0.9300 . ?
O1C C1C 1.226(5) . ?
C1C H1C 0.9300 . ?
C3C H2C 0.9600 . ?
C3C H3C 0.9600 . ?
C3C H4C 0.9600 . ?
C4C H6C 0.9600 . ?
C4C H5C 0.9600 . ?
C4C H7C 0.9600 . ?
 
loop_
 _geom_angle_atom_site_label_1
 _geom_angle_atom_site_label_2
 _geom_angle_atom_site_label_3
 _geom_angle
 _geom_angle_site_symmetry_1
 _geom_angle_site_symmetry_3
 _geom_angle_publ_flag
O2A Zn01 O1A 121.31(8) 2_745 4_576 ?
O2A Zn01 N1B 91.83(9) 2_745 . ?
O1A Zn01 N1B 88.33(9) 4_576 . ?
O2A Zn01 N1A 90.63(9) 2_745 . ?
O1A Zn01 N1A 85.58(9) 4_576 . ?
N1B Zn01 N1A 173.85(10) . . ?
O2A Zn01 O2B 92.25(8) 2_745 2_656 ?
O1A Zn01 O2B 146.43(8) 4_576 2_656 ?
N1B Zn01 O2B 91.24(9) . 2_656 ?
N1A Zn01 O2B 94.29(9) . 2_656 ?
O2A Zn01 O1B 151.33(8) 2_745 2_656 ?
O1A Zn01 O1B 87.35(8) 4_576 2_656 ?
N1B Zn01 O1B 88.02(9) . 2_656 ?
N1A Zn01 O1B 92.52(9) . 2_656 ?
O2B Zn01 O1B 59.10(8) 2_656 2_656 ?
O2A Zn01 C1B 121.80(10) 2_745 2_656 ?
O1A Zn01 C1B 116.84(10) 4_576 2_656 ?
N1B Zn01 C1B 87.69(10) . 2_656 ?
N1A Zn01 C1B 95.80(10) . 2_656 ?
O2B Zn01 C1B 29.68(9) 2_656 2_656 ?
O1B Zn01 C1B 29.53(9) 2_656 2_656 ?
C1C N2 C3C 120.6(4) . . ?
C1C N2 C4C 120.1(4) . . ?
C3C N2 C4C 119.3(4) . . ?
C1A O1A Zn01 166.7(2) . 4_575 ?
C10A N1A C11A 116.0(3) . . ?
C10A N1A Zn01 122.6(2) . . ?
C11A N1A Zn01 121.4(2) . . ?
O1A C1A O2A 124.3(3) . . ?
O1A C1A C2A 118.0(3) . . ?
O2A C1A C2A 117.7(3) . . ?
C1A O2A Zn01 118.3(2) . 2_755 ?
C7A C2A C3A 119.6(3) . . ?
C7A C2A C1A 120.6(3) . . ?
C3A C2A C1A 119.8(3) . . ?
C2A C3A C4A 121.2(3) . . ?
C2A C3A H3A 119.4 . . ?
C4A C3A H3A 119.4 . . ?
C5A C4A C3A 118.4(3) . . ?
C5A C4A C8A 121.5(3) . . ?
C3A C4A C8A 120.1(3) . . ?
C6A C5A C4A 120.6(4) . . ?
C6A C5A H5A 119.7 . . ?
C4A C5A H5A 119.7 . . ?
C5A C6A C7A 120.0(4) . . ?
C5A C6A H6A 120.0 . . ?
C7A C6A H6A 120.0 . . ?
C2A C7A C6A 120.1(3) . . ?
C2A C7A H7A 119.9 . . ?
C6A C7A H7A 119.9 . . ?
C9A C8A C12A 116.4(3) . . ?
C9A C8A C4A 121.8(3) . . ?
C12A C8A C4A 121.7(3) . . ?
C8A C9A C10A 119.8(3) . . ?
C8A C9A H9A 120.1 . . ?
C10A C9A H9A 120.1 . . ?
N1A C10A C9A 124.2(3) . . ?
N1A C10A H10A 117.9 . . ?
C9A C10A H10A 117.9 . . ?
N1A C11A C12A 123.0(3) . . ?
N1A C11A H11A 118.5 . . ?
C12A C11A H11A 118.5 . . ?
C11A C12A C8A 120.5(3) . . ?
C11A C12A H12A 119.8 . . ?
C8A C12A H12A 119.8 . . ?
C1B O1B Zn01 89.24(18) . 2_646 ?
C10B N1B C11B 116.0(3) . . ?
C10B N1B Zn01 123.0(2) . . ?
C11B N1B Zn01 121.0(2) . . ?
O1B C1B O2B 121.3(3) . . ?
O1B C1B C2B 119.1(3) . . ?
O2B C1B C2B 119.6(3) . . ?
O1B C1B Zn01 61.23(15) . 2_646 ?
O2B C1B Zn01 60.41(15) . 2_646 ?
C2B C1B Zn01 173.4(2) . 2_646 ?
C1B O2B Zn01 89.91(19) . 2_646 ?
C7B C2B C3B 117.9(3) . . ?
C7B C2B C1B 122.0(3) . . ?
C3B C2B C1B 120.0(3) . . ?
C2B C3B C4B 121.0(3) . . ?
C2B C3B H3B 119.5 . . ?
C4B C3B H3B 119.5 . . ?
C3B C4B C5B 121.5(3) . . ?
C3B C4B H4B 119.3 . . ?
C5B C4B H4B 119.3 . . ?
C6B C5B C4B 117.3(3) . . ?
C6B C5B C8B 121.6(3) . . ?
C4B C5B C8B 121.1(3) . . ?
C5B C6B C7B 120.8(3) . . ?
C5B C6B H6B 119.6 . . ?
C7B C6B H6B 119.6 . . ?
C2B C7B C6B 121.4(3) . . ?
C2B C7B H7B 119.3 . . ?
C6B C7B H7B 119.3 . . ?
C9B C8B C12B 116.6(3) . . ?
C9B C8B C5B 120.8(3) . . ?
C12B C8B C5B 122.5(3) . . ?
C10B C9B C8B 119.3(3) . . ?
C10B C9B H9B 120.4 . . ?
C8B C9B H9B 120.4 . . ?
N1B C10B C9B 124.5(3) . . ?
N1B C10B H10B 117.7 . . ?
C9B C10B H10B 117.7 . . ?
N1B C11B C12B 123.4(3) . . ?
N1B C11B H11B 118.3 . . ?
C12B C11B H11B 118.3 . . ?
C11B C12B C8B 120.1(3) . . ?
C11B C12B H12B 119.9 . . ?
C8B C12B H12B 119.9 . . ?
O1C C1C N2 126.7(5) . . ?
O1C C1C H1C 116.7 . . ?
N2 C1C H1C 116.7 . . ?
N2 C3C H2C 109.5 . . ?
N2 C3C H3C 109.5 . . ?
H2C C3C H3C 109.5 . . ?
N2 C3C H4C 109.5 . . ?
H2C C3C H4C 109.5 . . ?
H3C C3C H4C 109.5 . . ?
N2 C4C H6C 109.5 . . ?
N2 C4C H5C 109.5 . . ?
H6C C4C H5C 109.5 . . ?
N2 C4C H7C 109.5 . . ?
H6C C4C H7C 109.5 . . ?
H5C C4C H7C 109.5 . . ?
 
loop_
 _geom_torsion_atom_site_label_1
 _geom_torsion_atom_site_label_2
 _geom_torsion_atom_site_label_3
 _geom_torsion_atom_site_label_4
 _geom_torsion
 _geom_torsion_site_symmetry_1
 _geom_torsion_site_symmetry_2
 _geom_torsion_site_symmetry_3
 _geom_torsion_site_symmetry_4
 _geom_torsion_publ_flag
Zn01 O1A C1A O2A -59.8(10) 4_575 . . . ?
Zn01 O1A C1A C2A 122.7(8) 4_575 . . . ?
O1A C1A O2A Zn01 -7.9(4) . . . 2_755 ?
C2A C1A O2A Zn01 169.62(18) . . . 2_755 ?
O1A C1A C2A C7A 163.0(3) . . . . ?
O2A C1A C2A C7A -14.7(4) . . . . ?
O1A C1A C2A C3A -15.9(4) . . . . ?
O2A C1A C2A C3A 166.5(3) . . . . ?
C7A C2A C3A C4A 0.4(5) . . . . ?
C1A C2A C3A C4A 179.3(3) . . . . ?
C2A C3A C4A C5A -1.5(5) . . . . ?
C2A C3A C4A C8A 176.1(3) . . . . ?
C3A C4A C5A C6A 1.0(6) . . . . ?
C8A C4A C5A C6A -176.6(4) . . . . ?
C4A C5A C6A C7A 0.6(7) . . . . ?
C3A C2A C7A C6A 1.2(6) . . . . ?
C1A C2A C7A C6A -177.7(4) . . . . ?
C5A C6A C7A C2A -1.7(7) . . . . ?
C5A C4A C8A C9A -149.8(4) . . . . ?
C3A C4A C8A C9A 32.6(5) . . . . ?
C5A C4A C8A C12A 32.0(5) . . . . ?
C3A C4A C8A C12A -145.6(3) . . . . ?
C12A C8A C9A C10A 1.5(5) . . . . ?
C4A C8A C9A C10A -176.9(3) . . . . ?
C11A N1A C10A C9A -2.4(5) . . . . ?
Zn01 N1A C10A C9A 176.4(2) . . . . ?
C8A C9A C10A N1A 0.1(5) . . . . ?
C10A N1A C11A C12A 3.1(5) . . . . ?
Zn01 N1A C11A C12A -175.7(3) . . . . ?
N1A C11A C12A C8A -1.6(6) . . . . ?
C9A C8A C12A C11A -0.8(5) . . . . ?
C4A C8A C12A C11A 177.5(3) . . . . ?
Zn01 O1B C1B O2B -6.8(3) 2_646 . . . ?
Zn01 O1B C1B C2B 172.5(3) 2_646 . . . ?
O1B C1B O2B Zn01 6.8(3) . . . 2_646 ?
C2B C1B O2B Zn01 -172.4(3) . . . 2_646 ?
O1B C1B C2B C7B 173.4(3) . . . . ?
O2B C1B C2B C7B -7.4(5) . . . . ?
O1B C1B C2B C3B -4.8(5) . . . . ?
O2B C1B C2B C3B 174.5(3) . . . . ?
C7B C2B C3B C4B -3.0(5) . . . . ?
C1B C2B C3B C4B 175.2(3) . . . . ?
C2B C3B C4B C5B 0.4(5) . . . . ?
C3B C4B C5B C6B 2.3(5) . . . . ?
C3B C4B C5B C8B -176.6(3) . . . . ?
C4B C5B C6B C7B -2.5(6) . . . . ?
C8B C5B C6B C7B 176.4(4) . . . . ?
C3B C2B C7B C6B 2.8(6) . . . . ?
C1B C2B C7B C6B -175.4(4) . . . . ?
C5B C6B C7B C2B 0.0(7) . . . . ?
C6B C5B C8B C9B 168.5(3) . . . . ?
C4B C5B C8B C9B -12.6(5) . . . . ?
C6B C5B C8B C12B -15.1(5) . . . . ?
C4B C5B C8B C12B 163.9(3) . . . . ?
C12B C8B C9B C10B -0.7(4) . . . . ?
C5B C8B C9B C10B 176.0(3) . . . . ?
C11B N1B C10B C9B -0.4(5) . . . . ?
Zn01 N1B C10B C9B -179.3(2) . . . . ?
C8B C9B C10B N1B 0.7(5) . . . . ?
C10B N1B C11B C12B 0.1(5) . . . . ?
Zn01 N1B C11B C12B 179.1(2) . . . . ?
N1B C11B C12B C8B -0.2(5) . . . . ?
C9B C8B C12B C11B 0.5(5) . . . . ?
C5B C8B C12B C11B -176.1(3) . . . . ?
C3C N2 C1C O1C -179.0(5) . . . . ?
C4C N2 C1C O1C -1.7(8) . . . . ?
 
loop_
 _geom_hbond_atom_site_label_D 
 _geom_hbond_atom_site_label_H 
 _geom_hbond_atom_site_label_A 
 _geom_hbond_distance_DH 
 _geom_hbond_distance_HA 
 _geom_hbond_distance_DA 
 _geom_hbond_angle_DHA 
 _geom_hbond_site_symmetry_A 
C9B H9B O2B  0.93 2.33 3.216(4) 159.0 4_565
C12B H12B O1C  0.93 2.39 3.276(5) 160.2 .
C10A H10A O2A  0.93 2.44 3.033(4) 121.9 2_745
 
_refine_diff_density_max    0.421
_refine_diff_density_min   -0.443
_refine_diff_density_rms    0.081

_shelxl_version_number 2014-3

_shelx_res_file
;
TITL C:a173_a.res
CELL 0.71073 9.3389 17.6775 14.7352 90.000 93.189 90.000
ZERR 4.0000 0.0015 0.0031 0.0025 0.000 0.005 0.000
LATT 1
SYMM -X, 0.5+Y, 0.5-Z
SFAC C H N O ZN
UNIT 108 92 12 20 4
BOND $H
CONF
EQIV $1 X,1/2-Y,Z-1/2
EQIV $2 2-X,Y-1/2,1/2-Z
HTAB C9B O2B_$1
HTAB C12B O1C
HTAB C10B O2A
HTAB C10A O2A_$2
ACTA
FMAP 2 1 53
PLAN 20 0 0
HTAB 2.0
LIST 6 1
L.S. 10
WGHT    0.047800
FVAR       0.28008
ZN01  5    0.866416    0.588528    0.519959    11.00000    0.02414    0.01641 =
         0.01741   -0.00058    0.00386    0.00049
N2    3    0.833641    0.573383    1.032266    11.00000    0.07634    0.05721 =
         0.05541   -0.00107   -0.01493   -0.00006
O1A   4    1.058344    0.946465    0.084058    11.00000    0.02893    0.03281 =
         0.02614    0.00380   -0.00099   -0.00575
N1A   3    0.993366    0.670025    0.453322    11.00000    0.03119    0.02330 =
         0.02093    0.00400    0.00224   -0.00298
C1A   1    1.157137    0.980793    0.126360    11.00000    0.01947    0.02111 =
         0.02144   -0.00149    0.00557    0.00233
O2A   4    1.204990    1.044443    0.103207    11.00000    0.03417    0.01824 =
         0.02152    0.00194    0.00435   -0.00397
C2A   1    1.227888    0.943308    0.207726    11.00000    0.02523    0.02436 =
         0.02472    0.00721    0.00368   -0.00032
C3A   1    1.162044    0.882141    0.247196    11.00000    0.02216    0.02461 =
         0.02220    0.00211    0.00048    0.00021
AFIX  43
H3A   2    1.073640    0.865391    0.222862    11.00000   -1.20000
AFIX   0
C4A   1    1.226299    0.845201    0.322976    11.00000    0.02900    0.02950 =
         0.03407    0.01027    0.00113   -0.00446
C5A   1    1.360614    0.870201    0.357035    11.00000    0.03705    0.06314 =
         0.05811    0.03878   -0.01968   -0.01383
AFIX  43
H5A   2    1.405699    0.845894    0.406782    11.00000   -1.20000
AFIX   0
C6A   1    1.427506    0.931022    0.317319    11.00000    0.03477    0.09102 =
         0.08561    0.05865   -0.03027   -0.03083
AFIX  43
H6A   2    1.517358    0.946946    0.340123    11.00000   -1.20000
AFIX   0
C7A   1    1.360047    0.968150    0.243371    11.00000    0.03609    0.05544 =
         0.05234    0.03066   -0.01221   -0.02077
AFIX  43
H7A   2    1.403778    1.009706    0.217852    11.00000   -1.20000
AFIX   0
C8A   1    1.149364    0.782907    0.367536    11.00000    0.02631    0.02590 =
         0.03216    0.00773   -0.00046   -0.00069
C9A   1    1.058051    0.735131    0.319079    11.00000    0.04988    0.02880 =
         0.02218    0.00416    0.00297   -0.00872
AFIX  43
H9A   2    1.046355    0.739596    0.256217    11.00000   -1.20000
AFIX   0
C10A  1    0.983512    0.680366    0.363911    11.00000    0.04320    0.02644 =
         0.02154    0.00121   -0.00110   -0.00855
AFIX  43
H10A  2    0.922561    0.648732    0.329273    11.00000   -1.20000
AFIX   0
C11A  1    1.086299    0.714901    0.500391    11.00000    0.04193    0.03357 =
         0.02444    0.00882   -0.00396   -0.01057
AFIX  43
H11A  2    1.099589    0.707666    0.562806    11.00000   -1.20000
AFIX   0
C12A  1    1.163136    0.771337    0.460458    11.00000    0.03971    0.03686 =
         0.03404    0.00846   -0.00565   -0.01257
AFIX  43
H12A  2    1.224632    0.801819    0.496268    11.00000   -1.20000
AFIX   0
O1B   4    0.160294    0.164441    0.861286    11.00000    0.02583    0.02721 =
         0.02795    0.00406    0.00311   -0.00715
N1B   3    0.760806    0.501974    0.592132    11.00000    0.02343    0.02229 =
         0.01961   -0.00039    0.00365   -0.00035
C1B   1    0.279980    0.184513    0.895955    11.00000    0.02943    0.02159 =
         0.02687    0.00241    0.00524   -0.00348
O2B   4    0.322311    0.163700    0.974687    11.00000    0.03625    0.03348 =
         0.02542    0.01078   -0.00183   -0.00837
C2B   1    0.375051    0.233581    0.841634    11.00000    0.02666    0.02043 =
         0.02992    0.00703    0.00073   -0.00556
C3B   1    0.335133    0.251262    0.752833    11.00000    0.03147    0.03922 =
         0.03007    0.00592   -0.00317   -0.01531
AFIX  43
H3B   2    0.252853    0.229635    0.725452    11.00000   -1.20000
AFIX   0
C4B   1    0.415200    0.300485    0.703953    11.00000    0.03794    0.04444 =
         0.02023    0.00765   -0.00587   -0.01445
AFIX  43
H4B   2    0.385500    0.311745    0.644189    11.00000   -1.20000
AFIX   0
C5B   1    0.539031    0.333632    0.741774    11.00000    0.02339    0.02923 =
         0.02530    0.00797    0.00281   -0.00114
C6B   1    0.581950    0.313235    0.829268    11.00000    0.04357    0.08607 =
         0.03821    0.02869   -0.01963   -0.03972
AFIX  43
H6B   2    0.666615    0.332851    0.855899    11.00000   -1.20000
AFIX   0
C7B   1    0.500149    0.263599    0.878368    11.00000    0.05273    0.08782 =
         0.03219    0.02837   -0.01966   -0.03483
AFIX  43
H7B   2    0.531247    0.250597    0.937368    11.00000   -1.20000
AFIX   0
C8B   1    0.620465    0.389891    0.690220    11.00000    0.02081    0.02410 =
         0.02288    0.00330    0.00245    0.00086
C9B   1    0.591418    0.400091    0.597188    11.00000    0.02331    0.03127 =
         0.02808    0.00194    0.00101   -0.00951
AFIX  43
H9B   2    0.524715    0.369506    0.565590    11.00000   -1.20000
AFIX   0
C10B  1    0.662554    0.455940    0.552586    11.00000    0.02864    0.03318 =
         0.02084    0.00170    0.00078   -0.00302
AFIX  43
H10B  2    0.640681    0.462023    0.490671    11.00000   -1.20000
AFIX   0
C11B  1    0.789094    0.491716    0.682166    11.00000    0.02835    0.02894 =
         0.02431   -0.00215    0.00009   -0.00911
AFIX  43
H11B  2    0.856824    0.522893    0.711894    11.00000   -1.20000
AFIX   0
C12B  1    0.723062    0.437643    0.732121    11.00000    0.02917    0.03021 =
         0.02130    0.00496   -0.00122   -0.00329
AFIX  43
H12B  2    0.746790    0.432855    0.793990    11.00000   -1.20000
AFIX   0
O1C   4    0.783186    0.465052    0.950838    11.00000    0.13014    0.08680 =
         0.05563   -0.02274   -0.01719   -0.01431
C1C   1    0.826122    0.498282    1.020178    11.00000    0.10052    0.06579 =
         0.05005   -0.00394   -0.00687   -0.00726
AFIX  43
H1C   2    0.856585    0.468320    1.069416    11.00000   -1.20000
AFIX   0
C3C   1    0.889161    0.604769    1.118042    11.00000    0.10835    0.06972 =
         0.06389   -0.02603   -0.01332    0.00828
AFIX 137
H2C   2    0.924763    0.564639    1.156969    11.00000   -1.50000
H3C   2    0.813873    0.631083    1.146664    11.00000   -1.50000
H4C   2    0.965616    0.639372    1.107298    11.00000   -1.50000
AFIX   0
C4C   1    0.791916    0.624064    0.958022    11.00000    0.13432    0.08332 =
         0.09803    0.02693   -0.05184   -0.01162
AFIX 137
H6C   2    0.857988    0.665643    0.957482    11.00000   -1.50000
H5C   2    0.697030    0.642915    0.965981    11.00000   -1.50000
H7C   2    0.793114    0.597177    0.901464    11.00000   -1.50000
AFIX   0
HKLF 4

REM  C:a173_a.res
REM R1 =  0.0468 for    3713 Fo > 4sig(Fo)  and  0.0867 for all    5584 data
REM    327 parameters refined using      0 restraints

END

WGHT      0.0477      0.0000

REM Instructions for potential hydrogen bonds
HTAB C10A O2A_$2
HTAB C9B O2B_$1
HTAB C10B O2A_$2
HTAB C12B O1C

REM Highest difference peak  0.421,  deepest hole -0.443,  1-sigma level  0.081
Q1    1   0.7673  0.5823  0.5466  11.00000  0.05    0.42
Q2    1   0.3345  0.1972  0.8624  11.00000  0.05    0.33
Q3    1   0.6636  0.5811  1.0470  11.00000  0.05    0.32
Q4    1   0.6991  0.3019  0.8227  11.00000  0.05    0.32
Q5    1   0.7336  0.5373  1.1180  11.00000  0.05    0.30
Q6    1   0.9993  0.4784  1.0664  11.00000  0.05    0.29
Q7    1   0.5858  0.3573  0.7215  11.00000  0.05    0.29
Q8    1   1.0474  0.6307  1.1160  11.00000  0.05    0.29
Q9    1   0.9342  0.6869  0.4192  11.00000  0.05    0.28
Q10   1   0.5781  0.3765  0.3857  11.00000  0.05    0.27
Q11   1   0.4055  0.2995  0.6803  11.00000  0.05    0.27
Q12   1   0.9731  0.9462  0.1021  11.00000  0.05    0.27
Q13   1   0.1144  0.1394  0.8837  11.00000  0.05    0.27
Q14   1   0.4426  0.2966  0.9737  11.00000  0.05    0.26
Q15   1   0.9700  0.5874  0.4993  11.00000  0.05    0.26
Q16   1   0.4895  0.2605  0.7194  11.00000  0.05    0.26
Q17   1   1.3972  0.9412  0.4399  11.00000  0.05    0.26
Q18   1   0.6371  0.3884  0.6397  11.00000  0.05    0.26
Q19   1   0.9606  0.8799  0.3024  11.00000  0.05    0.26
Q20   1   0.7402  0.5994  1.0592  11.00000  0.05    0.25
;
_shelx_res_checksum   45281

_shelx_hkl_file
;
   1   0   0  929.36   29.94
   1   0   0  954.99   30.03
   1   0   0  945.26   30.84
   2   0   0 1131.19   36.81
   2   0   0 1120.76   35.78
   2   0   0 1099.06   37.82
   2   0   0 1153.61   36.41
   3   0   0 1176.13   41.05
   3   0   0 1173.38   39.09
   3   0   0 1210.90   40.05
   3   0   0 1213.25   38.36
   4   0   0 1024.45   32.78
   4   0   0  997.09   35.06
   4   0   0  994.68   33.67
   4   0   0  961.88   36.07
   5   0   0  141.58    7.06
   5   0   0  147.94   10.27
   5   0   0  142.23    8.09
   5   0   0  143.25   10.11
   6   0   0  184.40   12.95
   6   0   0  182.71   12.09
  -6   0   0  183.03    9.40
   6   0   0  171.17    9.85
   6   0   0  189.31    8.68
   7   0   0  122.11    8.82
   7   0   0  116.05   12.14
   7   0   0  137.04   13.65
   8   0   0  112.85    9.54
   8   0   0   99.05   13.51
   8   0   0   93.74   11.63
   9   0   0    1.47    7.08
   9   0   0    4.17    4.87
  10   0   0   44.37   11.90
  10   0   0   62.45    8.36
  11   0   0   75.05    9.67
  11   0   0   75.61   14.69
  12   0   0   15.54    7.05
  12   0   0  -14.83    8.25
   0  -1   0   -0.25    0.60
   0  -1   0   -0.13    0.58
   0   1   0   -0.11    0.65
   0   1   0   -0.22    0.78
   1  -1   0   86.70    4.26
  -1  -1   0   90.18    3.73
   1   1   0   87.42    3.82
   1   1   0   93.11    3.93
   1   1   0   88.82    4.64
   1   1   0   86.72    4.38
  -2  -1   0   44.00    3.30
   2  -1   0   44.47    4.62
   2  -1   0   43.62    3.78
   2   1   0   47.11    4.81
   2   1   0   30.30    3.99
   2   1   0   46.17    3.47
   3  -1   0   63.23    4.07
  -3  -1   0   69.01    4.67
   3  -1   0   65.10    5.18
   3  -1   0   79.77    6.74
   3  -1   0   83.43    6.90
   3   1   0   78.12    6.63
   3   1   0   63.52    6.36
   3   1   0   71.32    4.95
   4  -1   0   44.06    4.96
   4  -1   0   37.80    6.05
  -4  -1   0   36.65    4.00
   4  -1   0   45.57    6.33
   4  -1   0   46.06    3.70
   4   1   0   41.03    4.36
   4   1   0   44.48    6.29
   4   1   0   45.88    6.44
   4   1   0   38.20    4.30
   5  -1   0  365.93   13.15
  -5  -1   0  354.39   13.97
   5  -1   0  350.42   17.48
   5  -1   0  350.86   14.83
   5  -1   0  359.97   17.00
   5   1   0  367.13   14.05
   5   1   0  362.11   14.52
   5   1   0  342.79   16.84
   5   1   0  347.04   16.88
   6  -1   0  117.34    6.08
   6  -1   0  129.69   11.74
  -6  -1   0  122.80    7.19
   6  -1   0  122.90    8.42
   6  -1   0  118.13   11.16
   6   1   0  108.18    7.69
   6   1   0  105.57    6.77
   6   1   0  127.01   11.71
   7  -1   0    7.96    4.48
   7  -1   0    5.68    5.95
   7  -1   0    1.21    5.30
   7   1   0    2.07    5.76
   7   1   0    0.42    5.61
   7   1   0    4.74    3.91
   7   1   0    5.97    2.90
   8  -1   0   13.34    7.47
   8  -1   0   21.04    8.32
   8  -1   0   16.01    5.38
   8   1   0   15.97    5.00
   8   1   0   21.97    7.80
   8   1   0   23.18    7.52
   9  -1   0   32.07   10.33
   9  -1   0   25.94    6.48
   9  -1   0   20.76    8.91
   9   1   0   26.62    6.00
   9   1   0   17.48    8.53
  10  -1   0   41.58   10.49
  10  -1   0   42.43    8.00
  10   1   0   51.62    7.68
  10   1   0   29.37   10.07
  11  -1   0   12.60    6.77
  11  -1   0   -2.97    8.85
  11   1   0   16.62   11.06
  11   1   0    6.71    5.84
  12  -1   0   -1.26   10.21
  12  -1   0   -4.66    5.93
  12   1   0   -0.22    9.80
   0  -2   0  336.79   11.50
   0  -2   0  343.62   11.88
   1  -2   0  303.11   11.12
   1  -2   0  290.48   10.92
  -1  -2   0  297.21   10.54
   1   2   0  289.28   10.96
   1   2   0  301.83   10.58
   1   2   0  287.37   10.55
  -1   2   0  311.01   11.11
  -2  -2   0 1730.80   54.39
   2  -2   0 1650.53   55.12
   2  -2   0 1724.05   56.30
   2   2   0 1730.21   55.03
   2   2   0 1745.86   54.62
   2   2   0 1699.00   56.02
   2   2   0 1698.27   54.50
   3  -2   0  557.91   20.65
   3  -2   0  540.45   21.76
  -3  -2   0  586.88   19.74
   3   2   0  585.71   21.81
   3   2   0  567.34   19.94
   3   2   0  597.57   20.02
   3   2   0  586.35   21.84
   4  -2   0   16.25    5.35
  -4  -2   0   14.00    2.98
   4  -2   0   12.84    4.70
   4  -2   0   10.91    3.77
   4   2   0   13.76    3.39
   4   2   0   11.78    4.91
   4   2   0   21.40    4.87
   5  -2   0   51.43    6.07
   5  -2   0   50.60    7.56
  -5  -2   0   56.30    4.95
   5  -2   0   40.01    6.54
   5   2   0   51.53    5.26
   5   2   0   47.70    5.09
   5   2   0   57.87    8.12
   5   2   0   42.84    7.12
   6  -2   0   13.87    4.58
   6  -2   0   15.82    5.61
  -6  -2   0   14.90    3.65
   6  -2   0   14.33    6.47
   6   2   0   21.15    6.50
   6   2   0   16.77    3.71
   6   2   0   13.18    3.94
   6   2   0   18.98    6.30
   7  -2   0    1.38    5.48
   7  -2   0   11.94    6.31
   7  -2   0    4.17    4.52
   7   2   0    1.05    2.91
   7   2   0   -1.69    3.51
   7   2   0   -1.58    5.68
   7   2   0    1.57    5.57
   8  -2   0   13.79    7.36
   8  -2   0   23.28    7.91
   8  -2   0   14.61    5.96
   8   2   0   11.95    7.15
   8   2   0   10.01    4.68
   9  -2   0   14.43    5.87
   9  -2   0    4.86    7.36
   9  -2   0   15.70    9.22
   9   2   0    7.79    7.58
   9   2   0   27.90    5.92
  10  -2   0    4.89    8.79
  10  -2   0   13.90    6.67
  10   2   0   15.87    5.63
  10   2   0   18.22    9.98
  11  -2   0   22.96   10.55
  11  -2   0   33.45    8.37
  11   2   0   11.72   10.53
  11   2   0   22.15    6.65
  12  -2   0   24.29    7.88
  12  -2   0   11.30   11.41
  12   2   0    7.91   10.97
   0  -3   0   -1.87    1.98
   0  -3   0    0.17    2.10
   0   3   0    1.57    2.38
   1  -3   0   13.55    2.73
  -1  -3   0   11.27    2.64
   1  -3   0   11.61    3.24
   1   3   0   10.76    2.70
  -1   3   0    8.03    2.79
   1   3   0   15.46    3.46
   2  -3   0 5985.07  186.52
   2  -3   0 5861.51  184.15
  -2  -3   0 5818.47  183.27
   2   3   0 5633.77  183.31
   2   3   0 5907.50  183.42
   2   3   0 5960.31  181.85
   3  -3   0  122.69    7.39
  -3  -3   0  118.54    6.21
   3  -3   0  105.30    7.57
   3   3   0  116.11    6.35
   3   3   0  104.91    8.16
   3   3   0  118.15    6.36
  -4  -3   0  104.99    5.98
   4  -3   0  109.57    7.48
   4  -3   0  115.01    9.22
   4   3   0  102.91    6.47
   4   3   0  114.08    9.61
   4   3   0  107.87    8.37
   5  -3   0  364.34   18.00
   5  -3   0  354.11   16.82
  -5  -3   0  358.27   13.97
   5  -3   0  372.21   15.95
   5   3   0  383.28   17.81
   5   3   0  345.97   16.94
   5   3   0  363.31   14.64
   6  -3   0  583.30   25.50
   6  -3   0  540.58   22.24
   6  -3   0  563.77   24.48
   6   3   0  534.26   20.99
   6   3   0  549.45   21.43
   6   3   0  564.72   24.80
   7  -3   0   -1.64    6.31
   7  -3   0   12.87    5.09
   7  -3   0   12.62    6.20
   7   3   0    8.26    6.44
   7   3   0    4.47    3.72
   7   3   0    5.89    3.52
   8  -3   0   11.50    8.00
   8  -3   0   26.81    8.07
   8  -3   0   30.19    6.60
   8   3   0   15.63    7.31
   8   3   0   17.27    4.92
   9  -3   0   68.07   12.74
   9  -3   0   74.63    9.51
   9  -3   0   74.08   12.63
   9   3   0   65.26    7.60
   9   3   0   46.06   10.99
  10  -3   0   37.17   11.20
  10  -3   0   55.32   12.71
  10  -3   0   55.01    9.01
  10   3   0   56.86    7.79
  10   3   0   49.54   11.89
  11  -3   0  -16.76    7.28
  11  -3   0    3.78    6.61
  11   3   0   23.77   11.32
  11   3   0    8.34    5.87
  12  -3   0   20.35   11.56
  12  -3   0   14.07    7.89
  12   3   0    1.80   10.30
   0  -4   0    4.33    3.38
   0  -4   0    3.11    2.97
   0   4   0    0.09    2.78
   1  -4   0   46.36    5.24
   1  -4   0   38.92    3.88
   1  -4   0   33.79    4.57
  -1  -4   0   31.63    4.01
  -1   4   0   38.13    4.99
   1   4   0   36.18    3.99
  -2  -4   0   71.92    5.39
   2  -4   0   87.05    7.12
   2  -4   0   76.98    6.22
   2   4   0  108.07    8.07
   2   4   0   74.35    5.61
  -3  -4   0   35.49    4.08
   3  -4   0   26.54    4.80
   3  -4   0   23.12    4.68
   3   4   0   26.90    3.78
   3   4   0   34.19    5.84
   3   4   0   28.77    3.96
  -4  -4   0  312.37   12.57
   4  -4   0  307.75   14.30
   4  -4   0  335.10   15.70
   4   4   0  335.30   13.22
   4   4   0  315.65   12.98
   4   4   0  310.30   15.40
  -5  -4   0   28.70    3.92
   5  -4   0   18.72    4.98
   5  -4   0   26.43    6.37
   5   4   0   25.39    4.27
   5   4   0   16.44    5.75
   6  -4   0   12.35    6.46
   6  -4   0   19.09    6.17
   6  -4   0    5.35    4.42
   6   4   0   12.97    6.16
   6   4   0    9.05    3.85
   6   4   0   14.00    4.20
   7  -4   0  263.07   17.27
   7  -4   0  256.88   14.45
   7  -4   0  281.21   17.03
   7   4   0  255.58   16.64
   7   4   0  245.35   12.56
   7   4   0  253.12   13.17
   8  -4   0   46.75    9.90
   8  -4   0   68.72   11.47
   8  -4   0   61.65    8.69
   8   4   0   70.42    7.58
   8   4   0   53.25    9.65
   9  -4   0   15.89    8.45
   9  -4   0   -2.34    5.50
   9  -4   0    4.25    8.54
   9   4   0    6.82    4.62
   9   4   0    0.70    8.06
  10  -4   0    2.10    7.49
  10  -4   0    6.75    8.34
  10  -4   0   -4.02    6.17
  10   4   0    9.14    8.69
  10   4   0    7.55    5.32
  11  -4   0    4.38    6.43
  11  -4   0   -7.49    9.09
  11   4   0    4.90    5.56
  11   4   0    4.58    9.82
   0  -5   0   -0.77    3.37
   0  -5   0   -1.29    3.05
   0   5   0    3.98    3.59
   1  -5   0  259.34   10.52
   1  -5   0  276.79   12.12
   1  -5   0  248.24   11.35
  -1  -5   0  269.16   11.38
  -1   5   0  244.29   11.74
   1   5   0  267.47   11.51
  -2  -5   0   38.41    4.62
   2  -5   0   46.80    5.27
   2  -5   0   46.07    5.55
   2   5   0   51.48    6.52
  -2   5   0   47.32    5.85
   2   5   0   45.54    4.96
  -3  -5   0    5.83    2.99
   3  -5   0    7.11    4.08
   3  -5   0    6.84    4.18
   3   5   0    7.34    3.32
   3   5   0    8.50    5.00
   4  -5   0  246.53   13.35
   4  -5   0  262.55   12.86
  -4  -5   0  238.94   10.80
   4   5   0  247.88   11.12
   4   5   0  239.08   13.53
   4   5   0  254.42   11.32
  -5  -5   0   81.97    6.36
   5  -5   0   74.60    8.10
   5  -5   0   76.74    9.36
   5   5   0   72.95    6.42
   5   5   0   84.54    6.93
   5   5   0   87.72    9.82
   6  -5   0   23.67    5.84
   6  -5   0   21.44    7.31
   6   5   0   18.82    4.75
   6   5   0   17.89    7.12
   7  -5   0   43.96    9.74
   7  -5   0   51.42    9.61
   7  -5   0   45.18    7.58
   7   5   0   43.55    6.18
   7   5   0   40.22    8.54
   7   5   0   46.36    6.84
   8  -5   0   17.13    8.64
   8  -5   0   26.10    9.47
   8  -5   0   17.55    6.58
   8   5   0   19.03    5.24
   8   5   0    9.20    7.21
   8   5   0   21.92    5.67
   9  -5   0   21.32    7.22
   9  -5   0   14.91    9.21
   9  -5   0   13.41    8.47
   9   5   0   25.65    6.22
   9   5   0    7.58    8.08
  10  -5   0    5.77    6.83
  10  -5   0   -1.48    8.92
  10  -5   0   18.19   10.53
  10   5   0   17.09    9.81
  10   5   0    8.07    5.44
  11  -5   0   16.39   11.29
  11  -5   0   15.34    7.74
  11   5   0   11.91    5.92
  11   5   0   15.71    9.69
   0  -6   0  185.20   10.15
   0  -6   0  204.20    9.88
   0   6   0  198.77   10.36
  -1  -6   0  132.98    8.11
   1  -6   0  144.53    6.97
   1  -6   0  128.88    8.79
   1  -6   0  120.10    8.03
  -1   6   0  134.23    8.93
   1   6   0  137.32    8.37
   2  -6   0   73.76    7.13
  -2  -6   0   76.98    6.46
   2  -6   0   79.55    6.67
   2   6   0   79.19    7.73
  -2   6   0   83.39    7.73
   2   6   0   83.73    7.02
   3  -6   0  347.74   15.91
  -3  -6   0  353.63   14.36
   3  -6   0  347.07   15.52
   3   6   0  343.83   15.90
   3   6   0  355.46   14.74
  -4  -6   0 1037.43   36.14
   4  -6   0 1047.11   38.30
   4  -6   0 1052.72   38.70
   4   6   0 1104.58   39.08
   4   6   0 1064.60   36.82
   5  -6   0  250.67   13.53
  -5  -6   0  239.26   11.03
   5  -6   0  237.97   14.05
   5   6   0  233.36   11.63
   5   6   0  225.80   14.59
   6  -6   0   -9.95    4.21
   6  -6   0    2.26    5.32
   6   6   0    9.80    6.19
   6   6   0   -4.41    3.17
   7  -6   0   71.06   11.36
   7  -6   0   54.85    8.46
   7  -6   0   63.82   10.37
   7   6   0   68.23    7.30
   7   6   0   66.93   11.07
   7   6   0   63.85    8.09
   8  -6   0   82.09   12.47
   8  -6   0  101.88   11.44
   8  -6   0   83.44   12.55
   8   6   0   84.24    9.34
   8   6   0   92.19    8.81
   8   6   0   75.96   12.05
   9  -6   0    1.52    8.32
   9  -6   0    8.46    8.25
   9  -6   0    1.50    6.36
   9   6   0    7.02    5.02
   9   6   0   17.36    9.31
  10  -6   0   24.01   10.45
  10  -6   0    9.10    7.56
  10  -6   0   26.12   10.93
  10   6   0    3.55    9.27
  10   6   0   16.59    5.95
  11  -6   0   47.61   13.47
  11  -6   0   63.55   11.32
  11   6   0   41.66   13.06
   0  -7   0   -6.90    3.50
   0  -7   0   -0.44    3.43
   0   7   0   -0.51    3.45
   1  -7   0  229.06   12.04
  -1  -7   0  231.50   11.35
   1  -7   0  214.65    9.67
   1  -7   0  223.65   11.22
  -1   7   0  205.39   11.43
   1   7   0  220.52   11.46
   2  -7   0  153.51    8.86
  -2  -7   0  142.89    8.99
   2  -7   0  170.95   10.61
  -2   7   0  186.94   10.71
   2   7   0  163.52    9.36
   3  -7   0   58.63    6.71
   3  -7   0   52.20    7.24
  -3  -7   0   68.99    6.41
   3   7   0   54.25    7.69
   3   7   0   39.39    5.82
   4  -7   0    1.13    4.22
  -4  -7   0   -4.26    2.85
   4  -7   0   -3.42    4.21
   4   7   0   -0.04    3.48
   4   7   0    0.43    5.14
   5  -7   0   80.80    9.37
   5  -7   0   67.64    9.14
  -5  -7   0   70.48    6.59
   5   7   0   70.59   10.01
   5   7   0   84.87    7.51
   6  -7   0   88.84   10.76
   6  -7   0   93.98   10.50
   6   7   0   97.16   11.33
   6   7   0  102.40    8.91
   7  -7   0   24.27    8.73
   7  -7   0   27.16    7.29
   7   7   0   27.91    8.32
   7   7   0   44.69    6.39
   8  -7   0   35.39    9.40
   8  -7   0   41.15   10.32
   8  -7   0   45.74    8.86
   8   7   0   38.30   10.80
   8   7   0   30.46    6.21
   8   7   0   30.67    6.78
   9  -7   0   68.38   13.16
   9  -7   0   75.08   12.97
   9  -7   0   71.91   10.76
   9   7   0   75.86    8.74
   9   7   0   56.92   12.70
  10  -7   0   50.17   12.23
  10  -7   0   42.92    9.67
  10  -7   0   45.30   11.93
  10   7   0   45.72    7.41
  10   7   0   28.20   10.62
  11  -7   0    9.56   10.03
  11  -7   0   -2.21    7.42
  11   7   0  -10.09    9.58
   0  -8   0  138.27    9.32
   0  -8   0  149.53    9.19
   0   8   0  184.22   10.79
   1  -8   0   61.31    6.77
  -1  -8   0   59.72    7.05
   1  -8   0   65.22    7.68
   1  -8   0   65.43    5.30
  -1   8   0   62.40    7.76
   1   8   0   46.75    6.09
  -2  -8   0   27.00    4.94
   2  -8   0   36.09    5.02
   2  -8   0   19.89    5.19
  -2   8   0   21.07    5.19
   2   8   0   27.00    5.26
   3  -8   0   12.37    5.18
  -3  -8   0    3.53    3.46
   3  -8   0    9.14    4.33
   3   8   0   11.48    4.11
   3   8   0    7.60    5.55
   4  -8   0   12.70    6.08
   4  -8   0    9.53    4.73
  -4  -8   0   15.30    4.10
   4   8   0   12.12    6.53
   4   8   0   15.28    4.75
   5  -8   0   11.21    5.70
   5  -8   0   11.14    5.29
   5   8   0    9.11    4.56
   5   8   0   13.55    6.79
   6  -8   0   15.54    7.17
   6  -8   0   11.52    6.18
   6   8   0   10.06    6.87
   6   8   0   13.91    5.02
   7  -8   0  174.16   16.15
   7  -8   0  139.43   13.58
   7   8   0  148.55   10.45
   7   8   0  121.91   14.30
   8  -8   0    2.92    6.89
   8  -8   0    2.13    7.47
   8  -8   0   -4.10    6.20
   8   8   0   14.21    8.96
   8   8   0    7.73    5.14
   8   8   0    0.43    4.41
   9  -8   0    3.65    7.94
   9  -8   0   10.71    7.63
   9  -8   0    5.71    9.10
   9   8   0    6.42    9.69
   9   8   0    6.09    5.20
  10  -8   0   -5.06    8.82
  10  -8   0   -0.82    7.17
  10  -8   0   -5.29    9.43
  10   8   0    0.66    5.39
  10   8   0    6.16    9.93
  11  -8   0    3.00    8.99
  11  -8   0  -10.52    7.16
  11  -8   0   11.60   10.42
  11   8   0    2.92   10.14
   0  -9   0   -1.81    2.28
   0  -9   0   -2.23    3.39
   0  -9   0   -0.28    4.15
   0   9   0   -0.81    3.79
   1  -9   0  603.45   21.90
   1  -9   0  623.81   23.67
  -1  -9   0  604.65   24.02
   1  -9   0  597.57   24.62
  -1  -9   0  601.28   23.27
  -1   9   0  598.45   24.70
   1   9   0  589.39   24.29
   2  -9   0  713.38   26.77
  -2  -9   0  682.02   26.54
   2  -9   0  729.76   25.91
   2  -9   0  655.49   27.52
  -2   9   0  667.54   27.55
   2   9   0  716.33   27.16
  -3  -9   0  133.85    8.87
   3  -9   0  144.33   11.01
   3  -9   0  123.15    9.22
  -3   9   0  124.54    9.92
   3   9   0  129.04    9.48
  -4  -9   0   12.50    4.38
   4  -9   0   14.63    5.09
   4  -9   0   10.88    5.95
   4   9   0   15.45    6.45
   4   9   0   16.12    4.84
   5  -9   0  221.73   14.73
   5  -9   0  238.24   14.75
   5   9   0  236.34   13.13
   5   9   0  256.31   16.47
   6  -9   0  127.96   12.95
   6  -9   0  129.09   13.08
   6   9   0  144.73   10.35
   6   9   0  130.70   14.20
   7  -9   0    9.12    7.75
   7  -9   0    1.42    6.02
   7   9   0   14.28    5.03
   7   9   0   -1.72    7.74
   8  -9   0   41.87    9.32
   8  -9   0   41.77   10.58
   8   9   0   32.10   10.57
   8   9   0   45.85    7.31
   9  -9   0  142.15   15.41
   9  -9   0  156.98   17.03
   9  -9   0  164.67   18.56
   9   9   0  160.05   19.34
   9   9   0  160.71   11.89
  10  -9   0   -0.49    9.09
  10  -9   0   12.94    8.66
  10  -9   0   25.02   11.18
  10   9   0   23.23    6.67
  10   9   0   19.95   11.76
  11  -9   0    2.31   10.06
  11  -9   0   -5.72    7.53
  11  -9   0    3.24   10.26
  11   9   0  -18.81    8.96
   0 -10   0   14.44    4.89
   0 -10   0   22.79    3.25
   0 -10   0   19.30    4.97
   0  10   0   19.58    5.88
   1 -10   0   99.45    6.50
  -1 -10   0  107.56    9.50
   1 -10   0   77.72    8.85
  -1 -10   0  115.62    9.41
   1 -10   0   70.00    7.83
   1  10   0  102.74   10.02
  -1  10   0   85.89    9.43
   2 -10   0    5.37    4.56
   2 -10   0    3.38    3.44
   2 -10   0    3.64    5.20
  -2 -10   0   -4.25    3.64
  -2  10   0   -3.54    4.58
   2  10   0    1.42    3.96
  -3 -10   0  285.59   14.46
   3 -10   0  306.34   14.57
   3 -10   0  283.88   16.19
   3  10   0  269.77   14.88
  -3  10   0  302.17   16.32
  -4 -10   0  366.36   16.58
   4 -10   0  352.88   17.42
   4 -10   0  338.16   18.58
   4  10   0  356.25   19.02
   4  10   0  360.95   17.13
   5 -10   0   14.48    6.42
   5 -10   0   12.14    6.57
   5  10   0   13.72    7.69
   5  10   0    8.52    4.77
   6 -10   0    8.22    6.55
   6 -10   0   18.21    7.25
   6  10   0   15.80    5.79
   6  10   0   12.89    8.37
   7 -10   0  257.04   18.11
   7 -10   0  264.29   17.48
   7  10   0  229.10   14.45
   7  10   0  276.31   18.74
   8 -10   0  122.46   15.13
   8 -10   0  114.48   13.63
   8  10   0   95.81   14.71
   8  10   0  100.91   10.64
   9 -10   0    6.54    7.74
   9 -10   0    6.07    8.98
   9 -10   0   13.38    9.12
   9  10   0    0.81    9.48
   9  10   0   -4.23    5.73
   9  10   0    1.25    5.28
  10 -10   0   -8.12    7.56
  10 -10   0   -6.70    8.21
  10 -10   0    5.91    9.53
  10  10   0   -2.09    5.12
  10  10   0    3.31    9.27
   0 -11   0   -2.61    2.23
   0 -11   0   -1.40    4.70
   0 -11   0    1.05    3.74
   0  11   0    8.15    5.30
   1 -11   0  192.14   12.79
  -1 -11   0  174.39   11.69
   1 -11   0  184.28   11.56
   1 -11   0  172.12    9.11
  -1 -11   0  187.80   11.13
   1  11   0  169.51   11.64
  -1  11   0  179.45   12.42
  -2 -11   0   22.93    5.63
   2 -11   0   24.60    6.20
   2 -11   0   31.96    6.65
   2 -11   0   34.30    5.46
   2  11   0   27.10    5.94
  -2  11   0   23.91    6.43
   3 -11   0   29.98    7.26
   3 -11   0   29.56    5.71
  -3 -11   0   23.08    5.69
  -3  11   0   38.93    7.66
   3  11   0   22.16    6.00
   4 -11   0    1.11    4.68
   4 -11   0   -2.02    5.41
   4  11   0   -2.75    4.35
   5 -11   0  486.39   23.93
   5 -11   0  482.03   23.07
   5  11   0  472.92   21.62
   5  11   0  477.94   24.53
   6 -11   0   -0.12    5.93
   6 -11   0   -2.49    6.44
   6  11   0   10.09    8.45
   6  11   0   -2.43    4.72
   7 -11   0    1.68    6.89
   7 -11   0    5.89    6.36
   7  11   0    7.26    9.05
   7  11   0   10.00    5.69
   8 -11   0   26.81    8.90
   8 -11   0   12.69    8.56
   8  11   0   16.34    6.12
   8  11   0   14.56   10.02
   9 -11   0    9.79    8.26
   9 -11   0    7.74    8.95
   9 -11   0   -5.33    8.42
   9  11   0    0.13    6.37
   9  11   0    0.18    9.96
   9  11   0    8.96    5.60
  10 -11   0    6.69    9.47
  10 -11   0   -4.06    7.76
  10 -11   0    0.63    9.75
  10  11   0    0.90    5.25
  10  11   0    1.23   10.86
   0 -12   0  470.49   17.39
   0 -12   0  452.00   21.71
   0 -12   0  449.12   20.39
   0  12   0  498.37   22.53
  -1 -12   0  131.27   11.05
   1 -12   0  116.48   11.44
   1 -12   0  125.57    7.71
   1 -12   0  116.41   10.65
  -1 -12   0  121.37   11.23
   1  12   0  122.22   12.03
  -1  12   0  150.22   13.65
   2 -12   0    0.54    4.98
  -2 -12   0   -4.64    3.90
   2 -12   0   -0.93    3.55
   2 -12   0   -0.83    4.80
   2  12   0    3.74    5.04
  -2  12   0   -4.29    5.37
  -3 -12   0  136.84   10.81
   3 -12   0  132.74   10.15
   3 -12   0  179.03   15.30
  -3  12   0  181.29   15.72
   3  12   0  151.95   11.63
   4 -12   0   39.90    8.99
   4 -12   0   51.61    7.72
   4  12   0   40.14    7.59
   5 -12   0   59.03    9.40
   5 -12   0   53.09   10.25
   5  12   0   54.44    8.51
   6 -12   0   48.45    9.79
   6 -12   0   75.05   11.33
   6  12   0   73.60    9.47
   6  12   0   58.31   11.02
   7 -12   0  225.83   19.17
   7 -12   0  207.79   18.36
   7  12   0  177.55   13.41
   7  12   0  168.72   17.82
   8 -12   0   76.06   12.46
   8 -12   0   60.76   12.64
   8  12   0   71.01    9.74
   8  12   0   60.04   13.88
   9 -12   0   25.46   10.46
   9 -12   0   24.37   10.77
   9  12   0   36.39    7.93
   9  12   0   21.40   11.53
   9  12   0   28.69    8.81
  10 -12   0   14.35   10.89
  10 -12   0   14.15   10.43
  10 -12   0   23.68   10.63
  10  12   0   17.18   11.41
  10  12   0    6.18    5.98
   0 -13   0    4.31    5.44
   0 -13   0   -1.11    4.44
   0  13   0   -2.50    4.84
   1 -13   0  291.25   17.53
  -1 -13   0  320.62   17.47
   1 -13   0  341.49   17.23
   1 -13   0  313.70   13.65
  -1 -13   0  292.25   16.05
  -1  13   0  314.28   18.44
   1  13   0  353.08   18.45
   2 -13   0  265.20   13.04
   2 -13   0  242.16   16.61
   2 -13   0  250.45   15.59
  -2 -13   0  265.61   15.15
  -2 -13   0  288.12   15.75
   2  13   0  272.20   16.09
  -2  13   0  249.20   16.47
   3 -13   0   58.55    7.44
  -3 -13   0   50.83    8.30
   3 -13   0   56.64    9.48
   3  13   0   54.94    8.90
  -3  13   0   63.51   10.46
   4 -13   0   64.22    8.98
   4 -13   0  101.12   12.73
   4  13   0   59.96    8.89
   5 -13   0  142.33   13.30
   5 -13   0  114.18   13.46
   5  13   0  134.00   12.42
   6 -13   0  129.65   13.99
   6 -13   0   71.55   11.44
   6  13   0   94.50   11.01
   7 -13   0   11.42    8.17
   7 -13   0   17.57    8.72
   7  13   0   12.68    8.74
   7  13   0   12.42    6.89
   8 -13   0   43.03   11.52
   8 -13   0   20.84    9.87
   8  13   0   38.15   11.65
   8  13   0   16.09    7.27
   9 -13   0   45.57   12.19
   9 -13   0   49.21   12.02
   9  13   0   45.67   13.98
   9  13   0   49.90    8.88
   9  13   0   44.80   10.65
  10  13   0   20.67    7.48
   0 -14   0   26.26    7.31
   0 -14   0   25.54    6.48
   0  14   0   34.26    7.96
  -1 -14   0   19.33    6.08
   1 -14   0   12.06    6.06
   1 -14   0   12.75    6.31
  -1 -14   0   10.35    6.62
  -1  14   0    4.67    5.86
   1  14   0   13.77    6.44
  -2 -14   0   19.86    6.21
   2 -14   0   20.23    7.42
   2 -14   0    8.11    6.02
  -2 -14   0   14.66    6.28
  -2  14   0   12.24    6.93
   2  14   0   25.92    7.39
   3 -14   0   64.84   10.17
   3 -14   0  101.10    9.18
   3  14   0   91.84   10.74
  -3  14   0   52.39    9.38
   4 -14   0   -0.26    5.96
   4 -14   0   -4.59    5.08
   4  14   0    6.71    6.27
   5 -14   0    6.70    6.58
   5 -14   0   12.81    7.05
   5  14   0   -2.35    5.30
   6 -14   0   36.80    9.45
   6 -14   0   47.94   11.01
   6  14   0   22.46    7.82
   7 -14   0   -7.40    7.15
   7 -14   0    4.05    7.80
   7  14   0    1.22    6.32
   8 -14   0   -2.61    7.59
   8 -14   0  -13.36    7.28
   8  14   0   -2.38    9.13
   8  14   0    9.79    6.64
   9 -14   0   -7.73    8.42
   9 -14   0   14.35    9.50
   9  14   0    5.42   10.68
   9  14   0    3.50    6.47
   0 -15   0   -0.81    5.10
   0 -15   0  -10.44    5.52
   0  15   0   -3.83    6.09
   1 -15   0   45.84    8.57
   1 -15   0   33.04    7.91
  -1 -15   0   54.04    9.58
  -1 -15   0   42.79    7.91
   1  15   0   22.85    7.30
  -1  15   0   47.59    9.63
  -2 -15   0   52.82    8.62
   2 -15   0   47.51    8.78
  -2 -15   0   44.94    8.80
   2 -15   0   48.80   10.14
  -2  15   0   72.77   11.74
   2  15   0   50.69    9.38
   3 -15   0  101.10   12.82
   3  15   0   89.30   11.36
  -3  15   0  127.75   14.93
   4 -15   0   -0.22    7.15
   4  15   0    3.18    6.28
   5 -15   0   69.05   11.78
   5 -15   0   86.26   12.89
   5  15   0   61.62   10.14
   6 -15   0   50.96   10.15
   6 -15   0   42.25   10.83
   6  15   0   41.16    8.99
   7 -15   0    7.12    8.55
   7 -15   0   20.90    9.33
   7  15   0    9.43    7.26
   8 -15   0    5.33    9.68
   8 -15   0   17.01    9.70
   8  15   0    5.79    6.77
   9 -15   0   52.91   13.17
   9 -15   0   50.50   13.16
   9  15   0   27.45    8.68
   0 -16   0   63.80   10.86
   0 -16   0   85.20   10.51
   0  16   0  101.95   12.82
  -1 -16   0   54.95    9.23
   1 -16   0   48.97    9.01
   1 -16   0   49.81    9.78
  -1 -16   0   71.35   10.91
   1  16   0   58.89   10.05
  -1  16   0   65.82   11.74
  -2 -16   0    2.89    5.94
   2 -16   0   -8.24    4.85
   2 -16   0   -2.13    5.79
  -2  16   0    8.49    6.51
   2  16   0    6.26    6.74
  -3 -16   0  156.20   14.19
   3 -16   0  159.59   16.63
   3  16   0  147.14   14.72
  -3  16   0  183.95   18.06
   4 -16   0  250.32   19.17
   4  16   0  232.62   16.54
   5 -16   0   18.27    9.05
   5  16   0   24.85    8.53
   6 -16   0   33.20   11.10
   6  16   0   34.68    9.08
   7 -16   0   62.04   13.12
   7  16   0   40.07    9.53
   8 -16   0   37.98   11.69
   8  16   0   27.55    9.25
   0 -17   0   -2.72    5.53
   0 -17   0    0.45    6.88
   0  17   0   -6.21    6.71
   1 -17   0   -1.90    5.85
   1 -17   0  -11.06    6.04
  -1 -17   0    1.79    6.06
  -1 -17   0    3.43    6.73
   1  17   0   -5.16    6.36
  -1  17   0   -0.50    6.87
  -2 -17   0   14.83    7.22
   2 -17   0   12.90    7.17
   2 -17   0   14.49    8.26
   2  17   0   11.60    7.17
  -2  17   0    4.32    7.65
  -3 -17   0   15.35    7.42
   3 -17   0    4.39    7.16
   3  17   0   10.07    7.08
   4 -17   0    1.06    8.32
   4  17   0    7.52    7.54
   5 -17   0    7.08    8.62
   5  17   0    3.24    6.69
   6 -17   0    6.17    8.33
   6  17   0    5.38    7.60
   7 -17   0    5.37    9.49
   7  17   0   15.17    8.22
   8 -17   0  -16.83    8.11
   8  17   0  -12.77    6.52
   0 -18   0   13.68    7.25
   0 -18   0    8.88    6.89
   0  18   0   17.82    8.34
  -1 -18   0    8.20    7.05
   1 -18   0   -0.88    6.07
   1 -18   0    7.60    8.84
   1  18   0    3.37    6.75
  -1  18   0   -1.00    7.13
   2 -18   0    8.80    8.23
  -2 -18   0   -1.82    6.61
  -2  18   0   10.17    7.70
   2  18   0   12.30    7.92
  -3 -18   0   15.51    8.02
   3 -18   0    7.83    8.80
   3  18   0   28.03    8.98
   4 -18   0  108.20   15.68
  -4 -18   0  110.79   13.80
   4  18   0  107.65   13.76
   5 -18   0   36.20   11.28
   5  18   0   32.14    9.53
   6 -18   0   22.07   10.12
   6  18   0    3.80    7.45
   7 -18   0   29.31   11.04
   7  18   0   32.88    9.68
   0 -19   0    5.23    7.55
   0 -19   0   11.15    7.18
   0  19   0    9.00    7.94
   1 -19   0  127.16   14.20
  -1 -19   0  131.81   14.05
   1 -19   0  110.86   15.03
   1  19   0  120.97   15.18
  -1  19   0   90.81   13.63
  -2 -19   0  168.51   16.14
   2 -19   0  157.04   18.01
  -2  19   0  161.43   18.26
   2  19   0  137.96   16.35
  -3 -19   0   19.03    8.54
   3 -19   0   12.75    9.20
   3  19   0   23.19    9.05
   4 -19   0   15.51    8.77
  -4 -19   0   21.10    9.09
   4  19   0   30.84    9.82
  -5 -19   0   53.76   11.69
   5 -19   0   52.67   12.85
   5  19   0   41.93   10.72
   6 -19   0   31.44   10.98
   6  19   0   62.39   11.69
   0 -20   0   -9.78    6.98
   0  20   0   10.12    8.39
  -1 -20   0    8.45    7.76
   1 -20   0    4.32    7.51
   1 -20   0   12.88    8.61
  -1  20   0   -8.94    7.10
   1  20   0   -4.01    6.94
  -2 -20   0   10.54    7.71
   2 -20   0   15.88    9.66
   2  20   0   15.46    8.46
  -2  20   0   11.42    9.32
   3 -20   0   -0.59    7.59
  -3 -20   0  -17.47    6.67
   3  20   0  -11.16    6.29
  -4 -20   0    1.81    7.69
   4 -20   0  -10.16    9.30
   4  20   0   -7.11    7.34
   5 -20   0   -1.66    9.21
  -5 -20   0   12.09    9.19
   5  20   0   10.42    8.33
   0 -21   0    7.75    8.37
   0  21   0   -6.78    6.78
   1 -21   0   67.78   12.34
  -1 -21   0   79.62   12.88
  -1  21   0   75.20   14.59
   1  21   0   62.22   12.96
  -2 -21   0   53.44   11.42
   2 -21   0   41.83   11.41
  -2  21   0   56.42   13.20
   2  21   0   36.32   11.14
   3 -21   0    5.06    9.55
  -3 -21   0   -0.03    8.18
   3  21   0   12.29    9.48
   4 -21   0    2.85    9.52
   4  21   0   -4.37    7.67
   0 -22   0   63.76   12.18
   0  22   0   92.69   15.81
  -1 -22   0   33.09   10.68
   1 -22   0   62.74   12.77
  -1  22   0   40.76   12.21
   1  22   0   44.79   12.10
   2 -22   0   -4.90    8.74
   2  22   0    5.66    9.55
   3 -22   0   26.84   11.37
   3  22   0   20.74   10.37
  12   0  -1   -6.28    9.21
  11   0  -1    1.61    5.41
  11   0  -1    1.92   10.33
  10   0  -1    1.71    7.93
  10   0  -1    9.47    8.70
  10   0  -1    1.37    4.77
   9   0  -1    8.08    8.37
   9   0  -1    0.57    4.27
   9   0  -1    3.81    7.31
   8   0  -1   -5.29    6.15
   8   0  -1   -5.55    3.45
   8   0  -1    0.26    6.25
   7   0  -1    5.95    3.11
   7   0  -1    3.09    3.48
   7   0  -1    2.72    5.59
   7   0  -1    6.15    6.14
   6   0  -1    2.86    4.88
  -6   0   1   -0.23    2.49
   6   0  -1    4.93    2.82
   6   0  -1    0.75    3.08
   6   0  -1   -0.76    5.07
   5   0  -1    0.66    2.82
   5   0  -1   -4.24    4.22
   5   0  -1    0.97    2.55
   5   0  -1    4.91    4.38
   4   0  -1   -4.99    2.49
   4   0  -1   -1.72    2.48
   4   0  -1   -5.17    3.70
   4   0  -1   -1.31    3.80
   3   0  -1    1.32    2.25
   3   0  -1    1.12    3.70
   3   0  -1   -0.31    2.58
   3   0  -1    0.95    3.69
   2   0  -1    2.66    1.66
   2   0  -1   -1.11    2.75
   2   0  -1   -0.08    2.89
   2   0  -1    0.86    2.39
   1   0  -1   -1.42    1.58
   1   0  -1    0.87    0.80
   1   0  -1    1.64    1.72
   1   0  -1   -0.17    0.86
   1   0  -1   -0.64    1.73
   0   0  -1   -1.60    0.89
   0   0   1   -0.78    0.71
   1   0   1   -0.93    1.62
   2   0   1    0.05    2.66
   2   0   1   -3.28    3.02
   3   0   1    6.62    4.10
   3   0   1    8.42    3.25
   3   0   1    2.60    3.57
   4   0   1   -3.76    3.89
   4   0   1   -3.32    3.04
   4   0   1    0.81    4.12
   4   0   1    1.44    1.95
   5   0   1    5.54    2.00
   5   0   1    2.35    3.40
   5   0   1   -4.29    4.31
   5   0   1   -1.24    4.52
  -6   0  -1    0.98    3.36
   6   0   1    2.16    3.56
   6   0   1   -0.52    1.83
   6   0   1   -1.22    4.40
   6   0   1   -1.05    4.54
   7   0   1   -1.33    5.57
   7   0   1   -1.00    3.81
   8   0   1    0.06    6.64
   8   0   1   -1.33    4.48
   9   0   1   -1.35    5.34
   9   0   1   16.40    8.60
  10   0   1    2.97    8.71
  10   0   1   -0.23    5.69
  11   0   1   -2.24    9.86
  11   0   1    4.33    6.14
  12   0   1   -0.59    6.75
  12   0   1   -2.45   10.37
  12  -1  -1   24.63   12.21
  12   1  -1   -1.43    9.44
  11  -1  -1  134.28   18.10
  11  -1  -1  116.58   11.22
  11   1  -1   92.37    9.94
  11   1  -1  120.10   17.19
  10  -1  -1   29.12   10.61
  10  -1  -1   14.27    8.86
  10  -1  -1   -0.49    4.92
  10   1  -1   17.19   10.04
  10   1  -1   18.86    5.34
   9  -1  -1   12.88    7.91
   9  -1  -1    9.29    4.74
   9  -1  -1   -1.47    7.67
   9   1  -1   10.80    8.75
   9   1  -1    8.84    4.54
   9   1  -1    7.02    8.08
   8  -1  -1   76.41   11.55
   8  -1  -1   62.17   10.54
   8  -1  -1   73.63    7.77
   8   1  -1   63.22   11.03
   8   1  -1   73.33   11.28
   8   1  -1   74.31    7.38
   7  -1  -1  173.36   14.92
   7  -1  -1  169.68    9.87
   7  -1  -1  144.35   13.73
   7   1  -1  154.65   13.96
   7   1  -1  146.03    8.79
   7   1  -1  161.06    9.05
   7   1  -1  146.68   13.65
   6  -1  -1  124.84    7.24
   6  -1  -1  129.92   12.36
   6  -1  -1  153.92   11.38
   6  -1  -1  147.24    8.44
   6   1  -1  150.30   11.53
   6   1  -1  135.25    7.70
   6   1  -1  122.97   11.55
   6   1  -1  115.75    7.77
   5  -1  -1   98.12    9.55
   5  -1  -1  106.55    6.97
   5  -1  -1  109.81    9.36
   5  -1  -1  115.91    6.51
   5   1  -1  106.40    6.33
   5   1  -1  103.48    6.89
   5   1  -1  110.22    9.87
   5   1  -1  108.45   10.08
   4  -1  -1  294.19   11.93
   4  -1  -1  293.35   14.13
  -4  -1   1  290.05   10.85
   4  -1  -1  305.40   13.96
   4  -1  -1  295.41   11.76
   4   1  -1  294.11   14.02
   4   1  -1  301.07   14.30
   4   1  -1  296.85   12.44
   4   1  -1  301.46   11.33
  -3  -1   1   82.45    4.07
   3  -1  -1   80.40    5.25
   3  -1  -1   84.47    5.37
   3  -1  -1   80.98    6.70
   3  -1  -1   90.19    6.90
   3   1  -1   89.05    4.54
   3   1  -1   86.87    6.55
   3   1  -1   81.69    5.84
   3   1  -1   77.80    6.28
   2  -1  -1  110.65    6.14
   2  -1  -1  106.58    6.41
   2  -1  -1   95.08    5.04
   2  -1  -1  105.82    5.25
   2  -1  -1  100.68    5.32
   2   1  -1  103.89    6.27
   2   1  -1   98.90    4.14
   2   1  -1  104.95    6.01
   2   1  -1  102.93    6.50
   1  -1  -1  474.31   15.77
   1  -1  -1  478.98   16.56
   1  -1  -1  455.05   15.72
   1   1  -1  479.04   16.15
  -1   1   1  496.72   15.77
   1   1  -1  457.34   16.01
   1   1  -1  477.68   16.16
   0  -1   1 1978.89   59.95
   0   1  -1 1831.91   59.89
   0   1  -1 1938.85   59.60
   0   1   1 1876.87   60.03
  -1  -1  -1  253.54    9.34
   1  -1   1  260.62    9.55
   1   1   1  248.11    9.39
   1   1   1  246.32    9.29
   1   1   1  235.38    9.16
  -2  -1  -1   81.35    4.96
   2  -1   1   71.49    5.61
   2  -1   1   79.71    5.42
   2   1   1   64.57    5.14
   2   1   1   73.86    5.41
   3  -1   1  102.85    7.02
   3  -1   1  120.06    7.75
   3  -1   1  111.76    7.72
  -3  -1  -1   99.04    6.38
   3   1   1  106.03    6.57
   3   1   1  115.87    7.81
   4  -1   1  198.43    9.85
   4  -1   1  201.38   11.18
  -4  -1  -1  186.44    9.24
   4  -1   1  187.18    6.98
   4  -1   1  190.45   11.05
   4   1   1  200.58    9.62
   4   1   1  191.74   11.11
   5  -1   1   29.02    6.07
   5  -1   1   28.46    5.09
   5  -1   1   43.03    6.78
   5  -1   1   35.98    2.82
  -5  -1  -1   27.81    4.48
   5   1   1   39.49    3.98
   5   1   1   42.39    6.95
   5   1   1   34.81    5.08
  -6  -1  -1    6.90    3.71
   6  -1   1    4.49    4.81
   6  -1   1   10.25    4.26
   6  -1   1    7.03    5.08
   6   1   1    5.23    3.87
   6   1   1    0.73    5.12
   6   1   1   10.84    2.65
   7  -1   1   34.75    8.50
   7  -1   1   46.52    9.01
   7  -1   1   42.23    6.62
   7   1   1   58.01    6.99
   7   1   1   36.53    7.69
   8  -1   1  105.20   13.27
   8  -1   1   96.64    9.82
   8   1   1  113.69   10.07
   8   1   1   92.66   12.42
   9  -1   1   12.32    8.74
   9  -1   1   10.21    6.21
   9   1   1    9.53    8.41
   9   1   1   28.23    6.81
  10  -1   1   35.02   10.11
  10  -1   1   31.89    7.83
  10   1   1   20.83    9.21
  10   1   1   23.71    7.16
  11  -1   1    4.67   10.08
  11  -1   1   30.66    8.27
  11   1   1   37.12   12.76
  11   1   1   24.59    7.76
  12  -1   1    0.03    7.33
  12  -1   1   -0.63   10.10
  12   1   1    6.91    6.82
  12   1   1    4.23   10.36
  12  -2  -1    5.49    6.51
  12  -2  -1    2.88   10.60
  12   2  -1   -1.54    9.92
  11  -2  -1   20.74   10.40
  11  -2  -1    5.18    5.96
  11   2  -1   -4.13    8.80
  11   2  -1    3.71    4.86
  10  -2  -1   31.57   10.67
  10  -2  -1   23.87   10.33
  10  -2  -1    8.79    5.33
  10   2  -1    5.86    7.80
  10   2  -1   20.04    5.51
   9  -2  -1   73.94   12.00
   9  -2  -1   86.60   12.62
   9  -2  -1   73.80    8.63
   9   2  -1   92.73    8.22
   9   2  -1   89.64   12.78
   9   2  -1   76.06   12.25
   8  -2  -1   36.80    9.72
   8  -2  -1   32.36    8.25
   8  -2  -1   48.31    6.90
   8   2  -1   37.68    9.52
   8   2  -1   42.48    9.02
   8   2  -1   53.35    6.10
   7  -2  -1   14.45    5.82
   7  -2  -1    3.50    4.21
   7  -2  -1   -3.35    5.09
   7   2  -1    3.17    3.23
   7   2  -1   10.75    6.20
   7   2  -1    7.85    5.76
   7   2  -1    8.42    3.38
   6  -2  -1  137.99   11.99
   6  -2  -1  117.89    8.41
   6  -2  -1  129.08   11.96
   6   2  -1  123.34   11.25
   6   2  -1   98.81   10.44
   6   2  -1  126.30    7.28
   6   2  -1  126.34    8.02
   5  -2  -1  450.67   20.20
   5  -2  -1  426.55   19.13
   5  -2  -1  451.05   17.19
   5   2  -1  444.38   19.34
   5   2  -1  424.65   15.95
   5   2  -1  396.99   18.87
   5   2  -1  419.69   17.10
   4  -2  -1  172.36    8.44
   4  -2  -1  164.66   10.22
   4  -2  -1  155.82    8.45
   4  -2  -1  160.18    9.85
   4   2  -1  164.93    8.90
   4   2  -1  162.78   10.08
   4   2  -1  166.35   10.41
   4   2  -1  167.65    7.33
   3  -2  -1   88.88    7.61
   3  -2  -1   77.42    5.70
   3  -2  -1   76.02    6.53
   3  -2  -1   72.14    5.39
   3   2  -1   74.39    4.34
   3   2  -1   68.66    6.53
   3   2  -1   71.99    4.29
   3   2  -1   83.37    6.52
   3   2  -1   84.09    6.29
   2  -2  -1   21.32    3.30
  -2  -2   1   26.53    2.12
   2  -2  -1   29.65    4.63
   2  -2  -1   28.79    3.63
   2   2  -1   22.32    4.53
   2   2  -1   26.36    2.34
   2   2  -1   26.40    2.33
   2   2  -1   22.08    3.59
   1  -2  -1 1541.63   49.57
  -1  -2   1 1580.22   48.84
   1  -2  -1 1529.29   48.60
   1  -2  -1 1573.12   50.40
  -1   2   1 1569.76   49.56
   1   2  -1 1532.10   49.16
   1   2  -1 1548.15   48.91
   1   2  -1 1486.80   49.50
   1   2  -1 1576.65   48.90
   0  -2  -1    8.17    2.23
   0  -2   1   11.85    1.51
   0  -2   1   14.62    2.31
   0   2   1   10.00    2.33
  -1  -2  -1  184.66    7.41
   1  -2   1  161.21    7.40
   1  -2   1  166.48    7.26
   1   2   1  168.29    7.26
   1   2   1  171.61    7.34
   2  -2   1 1264.98   42.36
   2  -2   1 1282.37   41.83
  -2  -2  -1 1259.44   41.33
   2   2   1 1278.47   41.47
   2   2   1 1242.41   41.32
   3  -2   1  250.03   11.68
  -3  -2  -1  239.10   10.38
   3  -2   1  234.10   11.06
   3   2   1  242.48   11.43
   3   2   1  239.00   10.46
   4  -2   1    0.43    3.96
   4  -2   1    3.57    3.51
  -4  -2  -1    0.06    2.97
   4   2   1   -0.33    3.00
   4   2   1    4.00    4.00
  -5  -2  -1  295.72   12.76
   5  -2   1  287.84   15.11
   5  -2   1  291.43   13.91
   5  -2   1  320.90   16.01
   5   2   1  288.46   13.21
   5   2   1  292.49   15.22
   6  -2   1  473.33   22.14
   6  -2   1  445.27   21.93
   6  -2   1  482.79   19.98
  -6  -2  -1  498.28   18.85
   6   2   1  468.82   19.29
   6   2   1  461.15   17.96
   6   2   1  475.62   22.00
   7  -2   1   12.81    6.65
   7  -2   1    5.04    4.56
   7  -2   1    8.53    6.08
   7   2   1   -3.71    5.03
   7   2   1    4.71    3.14
   7   2   1    1.04    4.04
   8  -2   1   28.79    8.32
   8  -2   1   36.94    7.02
   8  -2   1   19.70    7.92
   8   2   1   30.24    9.17
   8   2   1   30.66    6.32
   9  -2   1  105.79   14.22
   9  -2   1  122.99   11.78
   9   2   1   99.96   13.88
   9   2   1  122.23   10.89
  10  -2   1  133.60   16.51
  10  -2   1  188.98   14.31
  10   2   1  175.98   12.69
  10   2   1  166.99   18.56
  11  -2   1   11.65    7.20
  11  -2   1   16.39    9.47
  11   2   1    3.07    6.13
  11   2   1   14.67    9.82
  12  -2   1   15.72    7.91
  12  -2   1   -9.09    8.88
  12   2   1   13.71    7.04
  12   2   1    4.51    9.86
  12  -3  -1   -5.66    9.81
  12  -3  -1    7.21    6.77
  12   3  -1   -4.19    9.61
  11  -3  -1    3.24    5.98
  11  -3  -1   -3.54    9.01
  11  -3  -1    5.83   10.04
  11   3  -1    8.21    9.86
  10  -3  -1   61.17   12.19
  10  -3  -1   35.85   11.62
  10  -3  -1   60.65    8.64
  10   3  -1   46.58    6.68
  10   3  -1   45.84   12.12
   9  -3  -1   -3.05    4.82
   9  -3  -1   -4.28    7.03
   9  -3  -1    1.71    7.40
   9   3  -1    4.12    7.27
   9   3  -1   -6.57    3.39
   8  -3  -1   -5.71    4.19
   8  -3  -1    7.80    7.23
   8  -3  -1   -6.68    6.42
   8   3  -1   -1.75    6.02
   8   3  -1   -3.96    5.56
   8   3  -1    0.15    3.42
   7  -3  -1   43.67    8.61
   7  -3  -1   37.39    6.24
   7  -3  -1   34.58    8.38
   7   3  -1   23.90    6.92
   7   3  -1   34.21    7.97
   7   3  -1   37.13    5.51
   7   3  -1   35.80    4.81
   6  -3  -1   91.48    8.28
   6  -3  -1   93.91   10.07
   6  -3  -1   87.58   10.56
   6   3  -1   96.84   10.32
   6   3  -1   83.64    7.85
   6   3  -1   96.81    6.23
   6   3  -1   81.85    9.50
   5  -3  -1    1.23    4.11
   5  -3  -1    3.78    4.60
   5  -3  -1    0.94    3.37
   5   3  -1    0.76    4.27
   5   3  -1   -0.32    4.51
   5   3  -1   -2.05    3.29
   5   3  -1    2.10    2.53
   4  -3  -1    2.26    3.26
   4  -3  -1    5.54    3.99
   4  -3  -1    4.78    4.58
   4   3  -1    2.76    4.29
   4   3  -1   -0.34    2.31
   4   3  -1   -0.96    3.58
   4   3  -1   -2.36    1.89
   4   3  -1   -0.50    3.42
  -3  -3   1   -0.52    1.82
   3  -3  -1    0.51    4.05
   3  -3  -1    4.26    3.25
   3   3  -1    0.66    3.16
   3   3  -1    3.18    2.15
   3   3  -1   -0.18    2.12
   3   3  -1    2.85    4.34
  -2  -3   1  393.92   13.64
   2  -3  -1  377.65   15.08
   2  -3  -1  390.89   15.77
   2   3  -1  418.00   13.92
   2   3  -1  398.95   13.89
  -2   3   1  399.97   15.01
   2   3  -1  383.75   15.47
   2   3  -1  381.89   14.69
   1  -3  -1   32.73    3.82
   1  -3  -1   40.70    4.40
  -1  -3   1   40.60    3.27
   1  -3  -1   31.90    3.59
   1   3  -1   34.37    3.29
   1   3  -1   34.07    3.37
  -1   3   1   43.98    4.25
   1   3  -1   32.31    2.54
   0  -3  -1   57.98    4.54
   0  -3   1   56.81    4.54
   0  -3   1   56.76    3.78
   0  -3  -1   63.05    4.87
   0   3   1   68.06    5.11
   0   3  -1   74.28    5.16
   1  -3   1  102.54    6.36
   1  -3   1   95.47    5.05
  -1  -3  -1   99.75    5.95
   1   3   1   86.97    5.76
   1   3   1   96.33    5.72
   2  -3   1    9.54    3.80
  -2  -3  -1   15.93    3.47
   2  -3   1   19.58    4.15
   2   3   1   15.85    4.39
   2   3   1   16.21    3.45
   3  -3   1  452.87   17.94
   3  -3   1  444.99   18.27
  -3  -3  -1  481.50   17.11
   3   3   1  442.56   17.14
   3   3   1  459.09   18.28
   4  -3   1   28.92    5.51
  -4  -3  -1   29.39    4.27
   4  -3   1   21.96    4.61
   4   3   1   27.34    4.30
   4   3   1   24.79    5.88
  -5  -3  -1   48.27    5.18
   5  -3   1   50.61    6.57
   5  -3   1   45.92    6.72
   5  -3   1   41.18    6.92
   5   3   1   52.78    5.65
   5   3   1   54.58    7.96
   6  -3   1    4.02    4.43
   6  -3   1   18.45    6.15
   6  -3   1    2.75    5.23
   6   3   1   10.94    6.12
   6   3   1    5.25    3.91
   7  -3   1  143.86   10.99
   7  -3   1  148.08   14.07
   7  -3   1  125.28   12.59
   7   3   1  145.16    9.88
   7   3   1  139.40    8.58
   7   3   1  132.81   13.11
   8  -3   1   13.55    6.09
   8  -3   1   -0.31    7.40
   8  -3   1    9.28    7.37
   8   3   1   10.81    7.71
   8   3   1    3.69    4.71
   9  -3   1    0.00    6.75
   9  -3   1    0.94    5.62
   9   3   1   -9.80    6.22
   9   3   1    1.41    4.76
  10  -3   1   -7.37    7.65
  10  -3   1    6.41    6.51
  10   3   1    3.25    5.66
  10   3   1    4.52    8.88
  11  -3   1   -6.06    6.95
  11  -3   1    7.50   10.35
  11   3   1   -2.66    5.73
  11   3   1    8.94    9.89
  11  -4  -1    4.68    6.24
  11  -4  -1    9.41    9.85
  11  -4  -1   22.31   11.09
  11   4  -1   -3.82    9.66
  10  -4  -1   24.44    7.29
  10  -4  -1    6.82    9.66
  10  -4  -1   19.06   10.00
  10   4  -1   19.29   10.32
  10   4  -1   19.21    5.59
   9  -4  -1   77.76   10.21
   9  -4  -1   69.36   12.20
   9  -4  -1   83.13   13.19
   9   4  -1   82.99   13.53
   9   4  -1   92.11    7.97
   8  -4  -1   12.56    8.41
   8  -4  -1   11.97    5.59
   8  -4  -1    9.82    7.44
   8   4  -1   13.66    7.22
   8   4  -1    8.44    4.43
   8   4  -1    8.06    4.02
   7  -4  -1   77.04   10.87
   7  -4  -1   67.19   10.25
   7  -4  -1   73.04    8.24
   7   4  -1   69.66    9.87
   7   4  -1   66.04    7.70
   7   4  -1   65.26   10.08
   7   4  -1   69.69    6.38
   6  -4  -1  242.76   12.84
   6  -4  -1  251.36   14.65
   6  -4  -1  212.27   15.31
   6   4  -1  220.27   12.35
   6   4  -1  258.55   15.14
   6   4  -1  243.39   10.84
   6   4  -1  241.98   14.47
   5  -4  -1   18.04    5.51
   5  -4  -1   15.13    4.61
   5  -4  -1   11.10    5.22
   5   4  -1   23.38    5.21
   5   4  -1   16.90    3.58
   5   4  -1   25.72    5.69
   5   4  -1   24.37    6.02
   4  -4  -1   97.96    7.38
  -4  -4   1   91.69    5.22
   4  -4  -1  100.01    9.43
   4   4  -1   98.85    5.96
   4   4  -1   96.20    5.54
   4   4  -1   89.82    8.03
   4   4  -1  108.15    9.30
   3  -4  -1   34.30    5.46
   3  -4  -1   40.30    5.50
  -3  -4   1   41.92    3.74
   3   4  -1   38.74    3.76
   3   4  -1   37.94    5.85
   3   4  -1   36.98    4.85
   3   4  -1   41.88    4.00
  -2  -4   1 3264.37  102.97
   2  -4  -1 3258.52  105.63
   2  -4  -1 3250.25  104.29
   2   4  -1 3208.88  104.36
  -2   4   1 3364.85  104.43
   2   4  -1 3293.48  103.15
   2   4  -1 3224.95  103.15
   2   4  -1 3265.74  103.33
  -1  -4   1  257.27   10.34
   1  -4  -1  276.01   11.46
   1  -4  -1  261.63   10.68
   1  -4  -1  247.20   11.22
   1   4  -1  239.12   10.32
  -1   4   1  252.26   11.16
   0  -4  -1   55.87    5.31
   0  -4   1   58.00    4.50
   0  -4  -1   62.37    5.81
   0  -4   1   84.29    5.95
   0   4  -1   48.54    4.77
   0   4   1   60.58    5.38
  -1  -4  -1   16.15    3.93
   1  -4   1    8.63    2.60
   1  -4   1    8.09    3.38
   1   4   1   13.80    3.64
   1   4   1    7.92    3.46
   2  -4   1   32.37    5.15
   2  -4   1   35.17    4.64
  -2  -4  -1   27.19    4.30
   2   4   1   20.27    3.95
   2   4   1   33.07    5.28
  -3  -4  -1   -1.89    2.91
   3  -4   1   -0.59    3.76
   3  -4   1    1.11    3.75
   3   4   1   -0.46    2.97
   3   4   1    6.62    4.54
   4  -4   1  105.58    9.27
   4  -4   1   92.34    8.12
  -4  -4  -1   97.66    6.91
   4   4   1  109.53    9.59
   4   4   1  102.36    7.20
  -5  -4  -1  102.51    6.92
   5  -4   1  107.16    9.82
   5  -4   1   95.21    8.58
   5   4   1  106.47   10.41
   5   4   1   93.79    7.79
   6  -4   1   73.11    8.43
   6  -4   1   64.95    9.45
   6  -4   1   79.99   10.19
   6   4   1   65.00    8.80
   6   4   1   89.06    7.99
   7  -4   1  122.86   11.24
   7  -4   1  115.06   12.62
   7  -4   1  119.74   12.94
   7   4   1  120.88   12.59
   7   4   1  126.66    9.10
   7   4   1  119.24    8.45
   8  -4   1    3.29    7.60
   8  -4   1    4.76    5.55
   8  -4   1   10.62    7.73
   8   4   1    2.93    4.65
   8   4   1    2.00    7.26
   9  -4   1    7.38    6.39
   9  -4   1   -6.02    7.11
   9   4   1   -0.22    8.03
   9   4   1   17.45    6.09
  10  -4   1   60.36    9.87
  10  -4   1   19.47    9.21
  10   4   1   38.88   10.66
  10   4   1   56.40    8.74
  11  -4   1   29.74   10.79
  11  -4   1   42.48    9.52
  11   4   1   17.23   10.31
  11   4   1   40.52    8.25
  11  -5  -1  106.27   16.09
  11  -5  -1   93.28   11.77
  11  -5  -1   70.95   14.48
  11   5  -1   79.51   14.56
  10  -5  -1   11.27    9.26
  10  -5  -1   13.63   10.10
  10  -5  -1   22.04    7.39
  10   5  -1   15.13    9.74
  10   5  -1   20.93    5.46
   9  -5  -1    3.31    8.71
   9  -5  -1  -12.33    4.54
   9  -5  -1    5.89    8.40
   9   5  -1    4.92    8.77
   9   5  -1    4.02    3.84
   8  -5  -1   38.18    7.87
   8  -5  -1   35.70    9.88
   8  -5  -1   29.89    8.91
   8   5  -1   35.37    5.42
   8   5  -1   33.14    6.40
   8   5  -1   45.03    9.95
   7  -5  -1  248.56   16.10
   7  -5  -1  239.02   16.45
   7  -5  -1  241.29   14.11
   7   5  -1  241.53   11.58
   7   5  -1  228.82   16.41
   7   5  -1  244.63   13.76
   6  -5  -1   18.79    7.11
   6  -5  -1   18.88    6.27
   6  -5  -1   12.16    5.28
   6   5  -1   27.88    4.22
   6   5  -1   21.57    7.15
   6   5  -1   34.41    5.98
   5  -5  -1   -4.13    3.72
   5  -5  -1    2.03    4.55
   5   5  -1    6.23    2.99
   5   5  -1    1.88    2.05
   5   5  -1    1.70    5.17
   4  -5  -1  621.85   24.94
   4  -5  -1  604.74   23.61
  -4  -5   1  610.21   21.08
   4   5  -1  599.51   24.37
   4   5  -1  589.74   21.59
   4   5  -1  597.37   21.51
   3  -5  -1 1065.59   37.12
  -3  -5   1 1095.42   35.15
   3  -5  -1 1058.22   37.63
   3   5  -1 1035.26   35.32
   3   5  -1 1035.48   37.18
   3   5  -1 1046.71   35.43
   2  -5  -1   68.67    6.54
   2  -5  -1   76.79    6.81
  -2  -5   1   68.04    5.28
  -2   5   1   51.85    5.79
   2   5  -1   57.44    6.48
   2   5  -1   68.31    5.53
   1  -5  -1   87.25    6.96
   1  -5  -1   84.54    6.65
  -1  -5   1   89.91    6.25
   1  -5  -1   80.12    5.78
  -1   5   1   94.88    7.09
   1   5  -1   86.70    6.09
   0  -5  -1   13.17    4.05
   0  -5   1   11.82    3.20
   0  -5  -1   11.16    4.31
   0  -5   1    8.47    3.76
   0   5   1   13.22    4.17
   0   5  -1    8.64    3.88
   1  -5   1    3.96    3.06
   1  -5   1    6.55    4.05
   1  -5   1    9.45    2.58
  -1  -5  -1    2.22    3.51
  -1   5  -1    2.65    3.70
   1   5   1    8.87    4.07
   2  -5   1   10.38    4.31
   2  -5   1    9.96    3.59
  -2  -5  -1   12.53    3.95
   2   5   1   21.74    4.32
   2   5   1   12.80    3.93
   3  -5   1  347.66   15.59
   3  -5   1  337.82   15.05
  -3  -5  -1  341.14   14.35
   3   5   1  361.02   15.92
   3   5   1  365.17   14.83
   4  -5   1  577.23   22.66
   4  -5   1  565.34   22.86
  -4  -5  -1  558.52   20.95
   4   5   1  556.35   21.41
   4   5   1  522.93   22.52
  -5  -5  -1  181.88    9.68
   5  -5   1  184.66   11.98
   5  -5   1  197.71   11.60
   5   5   1  173.31   10.11
   5   5   1  195.66   12.82
   6  -5   1    7.78    6.16
   6  -5   1   19.42    5.53
   6   5   1   14.40    5.99
   6   5   1   13.61    4.55
   7  -5   1  126.06   11.68
   7  -5   1  114.26   12.27
   7  -5   1  130.11   13.92
   7   5   1  121.57    9.60
   7   5   1  103.65   11.82
   8  -5   1  180.67   16.74
   8  -5   1  171.82   14.47
   8  -5   1  179.55   16.83
   8   5   1  217.06   18.52
   8   5   1  178.60   11.79
   9  -5   1   -1.55    5.97
   9  -5   1    2.60    7.45
   9  -5   1    9.26    8.58
   9   5   1    5.73    8.13
   9   5   1    4.09    5.25
  10  -5   1    9.28    7.08
  10  -5   1    5.40    8.99
  10   5   1   20.26   10.46
  10   5   1   -2.63    5.34
  11  -5   1   71.35   10.90
  11  -5   1   35.25   11.77
  11   5   1   59.38    9.50
  11   5   1   35.74   12.70
  11  -6  -1    1.44    7.21
  11  -6  -1   18.34   11.11
  11  -6  -1  -12.84    7.81
  11   6  -1    2.40   10.57
  10  -6  -1    8.02    9.50
  10  -6  -1    0.50    6.47
  10  -6  -1    4.19    8.70
  10   6  -1    4.02    4.44
  10   6  -1   -5.93    8.95
   9  -6  -1   15.27    9.34
   9  -6  -1    9.72    6.77
   9  -6  -1   25.02   10.36
   9   6  -1   15.39    9.56
   9   6  -1   11.05    4.77
   8  -6  -1   45.06   10.30
   8  -6  -1   32.09    9.15
   8  -6  -1   50.43    8.67
   8   6  -1   70.17    8.84
   8   6  -1   63.86    6.68
   8   6  -1   57.34   11.26
   7  -6  -1    8.45    5.83
   7  -6  -1   16.09    6.90
   7  -6  -1   -2.00    5.99
   7   6  -1    7.71    3.78
   7   6  -1   -0.72    4.19
   7   6  -1   14.35    7.54
   6  -6  -1    6.88    5.11
   6  -6  -1   -0.47    5.18
   6   6  -1   14.15    7.05
   6   6  -1    5.47    3.48
  -5  -6   1    0.78    2.42
   5  -6  -1    6.23    5.53
   5  -6  -1    4.78    4.48
   5   6  -1    1.03    2.19
   5   6  -1    2.16    3.08
   5   6  -1  -10.20    4.77
  -4  -6   1  449.84   16.68
   4  -6  -1  455.92   19.27
   4  -6  -1  439.82   19.68
   4   6  -1  428.65   16.92
   4   6  -1  437.17   19.80
   4   6  -1  455.95   17.25
   3  -6  -1   71.23    7.64
   3  -6  -1   63.09    7.26
  -3  -6   1   74.91    5.54
   3   6  -1   70.94    8.30
  -3   6   1   77.33    7.71
   3   6  -1   60.17    5.75
   2  -6  -1    4.48    3.55
   2  -6  -1    3.48    3.55
   2  -6  -1   -3.61    3.31
  -2  -6   1    1.95    3.04
  -2   6   1   -1.70    3.28
   2   6  -1    0.48    2.93
   1  -6  -1   41.46    5.80
   1  -6  -1   42.75    5.74
   1  -6  -1   51.75    5.09
  -1  -6   1   52.48    5.51
  -1   6   1   51.52    6.46
   1   6  -1   56.62    5.90
   0  -6  -1   21.09    4.57
   0  -6   1   23.27    3.89
   0  -6   1   13.93    4.03
   0  -6  -1   21.29    4.66
   0   6   1   29.06    5.24
   0   6  -1   24.73    5.13
   1  -6   1   70.54    6.06
   1  -6   1   50.93    6.30
  -1  -6  -1   57.34    6.28
   1  -6   1   65.60    4.78
   1   6   1   66.08    6.45
  -1   6  -1   59.32    6.27
  -2  -6  -1   49.46    5.75
   2  -6   1   43.10    6.05
   2  -6   1   49.74    5.29
   2   6   1   50.70    6.03
   2   6   1   34.46    5.38
  -3  -6  -1  183.05   10.17
   3  -6   1  198.46   10.72
   3  -6   1  206.63   11.26
   3   6   1  197.93   11.62
   3   6   1  204.96   10.66
   4  -6   1   61.10    7.81
   4  -6   1   63.83    7.37
  -4  -6  -1   62.23    6.46
   4   6   1   57.14    6.33
   4   6   1   76.70    8.67
  -5  -6  -1   31.03    4.78
   5  -6   1   29.46    6.51
   5  -6   1   25.58    6.29
   5   6   1   36.67    7.62
   5   6   1   31.63    5.53
   6  -6   1   20.26    6.14
   6  -6   1   18.05    6.46
   6   6   1   34.41    5.78
   6   6   1   14.30    7.15
   7  -6   1   -6.48    4.86
   7  -6   1    2.93    5.97
   7  -6   1   -8.14    5.52
   7   6   1   -0.11    4.54
   7   6   1    4.68    6.66
   8  -6   1   10.12    6.78
   8  -6   1    1.04    5.75
   8  -6   1   -3.94    6.21
   8   6   1   -0.87    4.75
   8   6   1  -15.92    5.98
   8   6   1   -2.02    3.91
   9  -6   1  -12.87    7.32
   9  -6   1    1.42    6.44
   9  -6   1   -5.47    7.50
   9   6   1    0.47    8.12
   9   6   1   -7.75    4.65
  10  -6   1    9.88    9.44
  10  -6   1    1.27    6.80
  10   6   1   -5.63    4.98
  10   6   1   -3.99    8.62
  11  -6   1    9.39    7.96
  11  -6   1   -1.17    8.96
  11   6   1    6.07   10.01
  11   6   1    2.51    5.88
  11  -7  -1   16.97   11.74
  11  -7  -1   25.90    8.92
  11  -7  -1   12.82    9.92
  11   7  -1   22.41   11.40
  10  -7  -1  -11.50    8.68
  10  -7  -1    1.61    8.74
  10  -7  -1    2.32    7.15
  10   7  -1   -3.73    9.11
  10   7  -1   -2.34    3.99
   9  -7  -1   17.25    8.98
   9  -7  -1    7.57    6.67
   9  -7  -1    7.28    7.88
   9   7  -1   -8.98    7.75
   9   7  -1    6.66    4.29
   8  -7  -1   15.76    7.93
   8  -7  -1   19.35    7.20
   8  -7  -1   10.59    7.93
   8   7  -1   10.58    8.55
   8   7  -1   16.00    4.70
   8   7  -1   15.07    6.09
   7  -7  -1   32.49    7.99
   7  -7  -1   23.69    7.67
   7  -7  -1   46.94    8.26
   7   7  -1   37.39    8.70
   7   7  -1   36.61    5.61
   7   7  -1   29.07    6.82
   6  -7  -1   17.18    7.09
   6  -7  -1   12.01    5.79
   6   7  -1   12.87    7.35
   6   7  -1    9.58    3.91
   5  -7  -1   13.64    6.14
   5  -7  -1    3.49    4.65
   5   7  -1    4.17    6.00
   5   7  -1    8.05    3.75
  -4  -7   1  600.21   22.20
   4  -7  -1  618.13   24.96
   4  -7  -1  610.61   25.14
   4   7  -1  617.06   25.57
   4   7  -1  614.01   22.82
   3  -7  -1   22.88    5.39
   3  -7  -1   33.91    5.76
  -3  -7   1   37.94    4.71
   3   7  -1   35.48    4.97
   3   7  -1   32.51    6.28
  -3   7   1   33.53    6.01
   2  -7  -1   70.56    7.51
   2  -7  -1   67.31    6.63
  -2  -7   1   64.73    6.09
   2  -7  -1   68.82    7.50
   2   7  -1   69.69    6.65
  -2   7   1   52.08    6.68
   1  -7  -1  246.33   12.43
   1  -7  -1  245.35   12.51
  -1  -7   1  268.79   12.03
   1  -7  -1  256.16   11.07
   1   7  -1  239.71   11.96
  -1   7   1  232.81   12.62
   0  -7  -1  246.83   12.07
   0  -7   1  256.80   11.19
   0  -7   1  247.14   12.21
   0  -7   1  242.97    8.78
   0  -7  -1  217.21   11.84
   0   7  -1  243.79   12.06
   0   7   1  255.12   12.69
  -1  -7  -1   99.58    8.20
   1  -7   1  122.78    6.28
   1  -7   1  110.31    7.72
   1  -7   1  132.13    9.24
   1   7   1  126.04    8.75
  -1   7  -1  121.38    8.92
  -2  -7  -1    0.33    3.44
   2  -7   1   -3.31    4.08
   2  -7   1    3.13    3.01
   2   7   1    1.10    3.84
   2   7   1   -5.03    3.51
   3  -7   1   18.00    4.74
  -3  -7  -1   23.77    4.58
   3  -7   1   12.85    4.94
   3   7   1   22.10    5.93
   3   7   1   22.81    4.77
  -4  -7  -1   41.59    5.61
   4  -7   1   32.72    6.23
   4  -7   1   38.76    6.69
   4   7   1   39.16    5.94
   4   7   1   30.36    7.12
  -5  -7  -1  164.83    9.90
   5  -7   1  171.18   11.90
   5  -7   1  161.37   11.92
   5   7   1  164.99   12.74
   5   7   1  152.64   10.04
   6  -7   1   14.18    6.06
   6  -7   1   26.74    6.71
   6   7   1    9.71    6.60
   6   7   1   21.23    5.72
   7  -7   1    1.72    6.00
   7  -7   1   -6.18    4.96
   7   7   1   -2.88    4.50
   7   7   1   14.74    7.78
   8  -7   1   81.21   10.94
   8  -7   1   50.32   10.39
   8  -7   1   54.80   10.41
   8   7   1   64.71    8.61
   8   7   1   62.75   12.10
   9  -7   1   21.18    9.96
   9  -7   1    0.06    7.75
   9  -7   1   32.64    8.96
   9   7   1   19.88   10.37
   9   7   1   27.17    6.81
  10  -7   1   11.64    8.72
  10  -7   1   20.50    8.64
  10   7   1   25.26    7.33
  10   7   1   17.26   10.33
  11  -7   1   15.60   10.21
  11  -7   1    1.96    7.92
  11   7   1    6.30    6.26
  11   7   1   15.96   10.93
  11  -8  -1   -0.31    8.00
  11  -8  -1   -4.11    8.93
  11  -8  -1    7.69   10.58
  11   8  -1    2.70   10.38
  10  -8  -1   21.58   10.77
  10  -8  -1   31.38   11.84
  10  -8  -1   34.97    9.25
  10   8  -1   33.47   12.28
  10   8  -1   26.81    6.10
   9  -8  -1  226.07   16.93
   9  -8  -1  229.97   21.18
   9  -8  -1  256.04   22.02
   9   8  -1  218.07   21.10
   9   8  -1  273.47   13.28
   9   8  -1  201.30   17.99
   8  -8  -1   35.82    9.49
   8  -8  -1   32.05    8.25
   8  -8  -1   53.58   11.58
   8   8  -1   48.92    6.57
   8   8  -1   51.61    8.65
   8   8  -1   49.00   11.39
   7  -8  -1   -6.26    5.25
   7  -8  -1    4.24    7.49
   7   8  -1   -1.08    3.76
   7   8  -1    7.79    7.07
   7   8  -1    3.63    5.30
   6  -8  -1  181.99   13.18
   6  -8  -1  184.30   15.77
   6   8  -1  163.67   14.79
   6   8  -1  168.38   10.19
   5  -8  -1  370.21   18.91
   5  -8  -1  383.29   18.91
   5   8  -1  380.83   20.16
   5   8  -1  383.81   16.40
  -4  -8   1    1.87    2.97
   4  -8  -1    1.32    4.43
   4  -8  -1    2.66    4.67
   4   8  -1   -0.24    3.30
   4   8  -1   -1.00    5.49
  -3  -8   1   92.59    7.36
   3  -8  -1   84.72    9.58
   3  -8  -1   82.53    8.33
   3   8  -1   77.44    7.36
  -3   8   1   78.25    8.54
  -2  -8   1  452.59   18.08
   2  -8  -1  430.37   18.76
   2  -8  -1  445.36   18.20
   2  -8  -1  470.30   19.81
  -2   8   1  437.89   19.39
   2   8  -1  437.44   18.39
   1  -8  -1   41.79    4.99
  -1  -8   1   37.46    5.48
   1  -8  -1   44.70    6.25
   1  -8  -1   36.46    5.97
  -1   8   1   51.05    7.14
   1   8  -1   44.80    6.35
   0  -8   1   31.38    2.74
   0  -8  -1   37.34    5.73
   0  -8   1   24.30    4.53
   0  -8   1   30.62    5.68
   0  -8  -1   19.66    5.25
   0   8   1   29.85    5.68
   0   8  -1   26.26    5.49
   1  -8   1    9.78    3.94
   1  -8   1   13.67    2.88
  -1  -8  -1    5.33    4.12
   1  -8   1    6.51    4.80
   1   8   1    7.66    4.50
  -1   8  -1    7.06    4.79
   2  -8   1  351.10   16.88
   2  -8   1  372.58   14.79
  -2  -8  -1  345.70   15.84
  -2   8  -1  322.29   16.32
   2   8   1  380.43   16.22
  -3  -8  -1  330.43   15.30
   3  -8   1  349.34   16.64
   3  -8   1  338.63   15.27
   3   8   1  344.01   16.68
   3   8   1  320.03   15.48
  -4  -8  -1   50.47    6.40
   4  -8   1   54.88    7.32
   4  -8   1   43.50    7.48
   4   8   1   31.94    5.87
   4   8   1   42.54    7.23
   5  -8   1  271.53   15.23
   5  -8   1  292.67   16.14
   5   8   1  256.96   14.04
   5   8   1  291.80   16.91
   6  -8   1  325.16   18.24
   6  -8   1  331.31   18.73
   6   8   1  330.17   19.42
   6   8   1  329.73   16.56
   7  -8   1   52.43   10.27
   7  -8   1   55.08    9.62
   7   8   1   75.15   11.62
   7   8   1   58.06    8.13
   8  -8   1   39.75    8.93
   8  -8   1   54.65   10.91
   8  -8   1   54.07   10.86
   8   8   1   38.11    7.67
   8   8   1   44.50   11.12
   9  -8   1   87.25   14.36
   9  -8   1   67.89   12.40
   9  -8   1   68.02   11.33
   9   8   1   75.09    9.61
   9   8   1   71.35   13.45
  10  -8   1   33.69    9.74
  10  -8   1   50.42   12.92
  10   8   1   26.34   10.68
  10   8   1   26.45    7.41
  11  -8   1   -5.52    7.47
  11  -8   1   12.86   11.17
  11   8   1  -12.34    9.44
  11   8   1    2.23    6.28
  11  -9  -1   47.81   14.00
  11  -9  -1   35.36   10.41
  11  -9  -1   37.48   12.35
  11   9  -1   35.00   13.35
  10  -9  -1   24.34   11.45
  10  -9  -1   14.72   11.25
  10  -9  -1   28.04    9.18
  10   9  -1   29.77   11.37
   9  -9  -1   -0.20    6.89
   9  -9  -1    8.94    9.34
   9  -9  -1    5.35    8.35
   9   9  -1    0.79    5.95
   9   9  -1    6.26    9.22
   9   9  -1    4.11    4.43
   8  -9  -1   99.92   14.32
   8  -9  -1   93.99   12.33
   8  -9  -1  110.31   13.84
   8   9  -1   78.53   12.51
   8   9  -1   91.69    8.81
   8   9  -1   81.35   10.67
   7  -9  -1   84.02   10.92
   7  -9  -1   90.08   12.36
   7   9  -1   76.17   12.22
   7   9  -1   98.31    8.84
   6  -9  -1  646.16   29.86
   6  -9  -1  735.33   31.59
   6   9  -1  760.36   27.37
   6   9  -1  691.88   31.86
   5  -9  -1   59.44    9.16
   5  -9  -1   71.37    9.33
   5   9  -1   81.05   10.53
   5   9  -1   57.92    7.04
   4  -9  -1   87.78   10.31
  -4  -9   1   64.13    6.57
   4  -9  -1   75.01    8.93
   4   9  -1   67.71    7.55
   4   9  -1   86.04   10.56
   3  -9  -1   47.68    6.67
   3  -9  -1   48.39    8.10
  -3  -9   1   46.00    5.95
   3   9  -1   56.66    7.07
  -3   9   1   42.76    7.21
   2  -9  -1   11.94    4.80
  -2  -9   1   17.44    4.48
   2  -9  -1   23.44    4.64
   2  -9  -1   25.08    5.60
   2   9  -1   21.27    5.03
  -2   9   1   22.02    5.92
  -1  -9   1   93.84    8.60
   1  -9  -1   87.11    6.88
   1  -9  -1  101.81    9.71
   1  -9  -1   88.19    8.54
  -1  -9   1   79.21    7.26
   1   9  -1   74.63    7.68
  -1   9   1   87.30    9.23
   0  -9   1  106.73    7.78
   0  -9   1   93.74    4.70
   0  -9  -1   81.80    8.23
   0  -9  -1  103.38    8.80
   0  -9   1   83.89    8.43
   0   9  -1  110.32    9.85
   0   9   1  107.49    9.60
   1  -9   1   14.49    3.03
   1  -9   1    9.02    4.93
   1  -9   1    7.38    3.99
  -1  -9  -1    6.12    4.30
   1   9   1    9.98    4.49
  -1   9  -1    2.61    4.11
   2  -9   1    5.98    4.75
  -2  -9  -1    6.93    4.23
   2  -9   1   -0.08    2.99
   2   9   1    8.16    4.69
  -2   9  -1    1.08    4.16
   3  -9   1   65.77    7.13
   3  -9   1   78.08    9.29
  -3  -9  -1   72.98    7.80
   3   9   1   77.45    9.18
   3   9   1   82.43    8.51
   4  -9   1   22.84    5.72
  -4  -9  -1   14.25    4.99
   4  -9   1   34.51    7.55
   4   9   1   29.30    5.93
   4   9   1   49.79    8.37
   5  -9   1   52.73    8.52
   5  -9   1   66.79    9.55
   5   9   1   52.00    8.97
   5   9   1   60.65    8.00
   6  -9   1    2.95    5.87
   6  -9   1   10.12    6.74
   6   9   1   17.38    5.74
   6   9   1    9.73    7.25
   7  -9   1   40.01    8.87
   7  -9   1   33.95    8.16
   7   9   1   41.89    7.49
   7   9   1   45.42    9.81
   8  -9   1   -2.42    6.52
   8  -9   1    1.62    6.84
   8   9   1   -5.47    7.86
   8   9   1    8.41    5.60
   9  -9   1  -10.38    6.56
   9  -9   1   -1.31    7.24
   9  -9   1    0.83    8.80
   9   9   1   -4.10    8.83
   9   9   1   -1.19    5.53
  10  -9   1   10.48   10.38
  10  -9   1    4.95    7.91
  10   9   1    1.55    6.22
  10   9   1   -6.02    9.45
  11  -9   1    0.75    9.73
  11  -9   1    6.05    8.55
  11   9   1   -1.62    6.13
  11   9   1    4.80   11.48
  10 -10  -1   61.44   11.70
  10 -10  -1   37.38   12.68
  10 -10  -1   70.73   14.91
  10  10  -1   55.35   14.15
   9 -10  -1   24.15    9.14
   9 -10  -1   30.48   11.00
   9 -10  -1   31.06    9.97
   9  10  -1   39.39    6.59
   9  10  -1   26.91    8.49
   9  10  -1   24.99   11.58
   8 -10  -1    5.81    8.80
   8 -10  -1    1.97    7.45
   8  10  -1    4.46    4.60
   8  10  -1   -0.49    6.14
   8  10  -1    8.74    9.29
   7 -10  -1   20.65    7.70
   7 -10  -1   24.87    8.80
   7  10  -1   25.04    5.76
   7  10  -1   19.09    9.60
   6 -10  -1  218.84   15.81
   6 -10  -1  209.81   15.07
   6  10  -1  217.37   12.67
   6  10  -1  226.19   17.35
   5 -10  -1  110.49   11.49
   5 -10  -1   81.75   10.91
   5  10  -1   82.54    8.60
   5  10  -1   84.00   11.02
   4 -10  -1   43.66    7.36
   4 -10  -1   23.69    6.77
   4  10  -1   38.31    6.30
  -3 -10   1   46.89    6.25
   3 -10  -1   54.44    8.14
   3 -10  -1   50.18    7.00
   3  10  -1   54.62    7.10
  -3  10   1   60.59    8.60
   2 -10  -1   86.58    7.81
   2 -10  -1   65.50    7.90
  -2 -10   1   63.08    7.32
   2 -10  -1   84.53    9.79
  -2  10   1   56.79    7.95
   2  10  -1   80.11    8.60
  -1 -10   1  192.69   10.58
   1 -10  -1  187.69    9.86
   1 -10  -1  180.65   11.74
   1 -10  -1  208.79   12.82
  -1 -10   1  201.66    7.29
  -1 -10   1  201.63   11.80
  -1  10   1  204.13   12.90
   1  10  -1  183.36   11.96
   0 -10   1   22.56    5.78
   0 -10   1   18.64    4.75
   0 -10  -1   12.69    4.82
   0 -10   1   26.20    2.74
   0 -10  -1   20.69    5.75
   0  10   1   24.92    6.44
   0  10  -1    9.14    4.87
  -1 -10  -1  122.28   10.45
   1 -10   1  128.97   10.05
   1 -10   1  129.65    6.79
  -1 -10  -1  122.57    9.36
   1 -10   1  123.68    8.95
   1  10   1  131.16   10.36
  -1  10  -1  138.98   11.75
  -2 -10  -1  162.25   10.71
   2 -10   1  175.04   12.16
   2 -10   1  145.72    8.58
   2  10   1  141.08   10.32
  -2  10  -1  176.72   12.14
  -3 -10  -1  160.47   10.42
   3 -10   1  138.13    9.40
   3 -10   1  163.96   13.82
   3  10   1  134.48   10.31
  -4 -10  -1    7.63    4.53
   4 -10   1    7.95    4.91
   4 -10   1   -0.27    4.99
   4  10   1    3.32    4.69
   4  10   1   -4.14    5.17
   5 -10   1   25.06    6.92
   5 -10   1    4.49    5.20
   5  10   1   19.87    6.26
   5  10   1   16.22    7.96
   6 -10   1   36.40    8.39
   6 -10   1   49.47    9.37
   6  10   1   54.76    8.21
   6  10   1   43.67   10.23
   7 -10   1    5.23    6.68
   7 -10   1    0.79    6.11
   7  10   1    5.94    7.25
   7  10   1   -0.01    5.39
   8 -10   1   14.82    8.29
   8 -10   1   30.00    8.99
   8  10   1   26.15   10.29
   8  10   1   31.86    7.69
   9 -10   1    5.17    8.26
   9 -10   1    0.61    8.42
   9 -10   1   11.62    8.58
   9  10   1    8.64    9.06
   9  10   1    1.23    6.13
   9  10   1   -5.62    5.21
  10 -10   1   13.40   10.35
  10 -10   1   16.15    9.68
  10  10   1    8.16   10.03
  10  10   1    7.67    6.88
  10 -11  -1   27.29   10.47
  10 -11  -1   19.82    9.53
  10 -11  -1   14.29   10.92
  10  11  -1  -10.55    8.85
   9 -11  -1   -3.62    8.86
   9 -11  -1   -1.07    9.06
   9 -11  -1    3.18    8.49
   9  11  -1   -2.64    6.70
   9  11  -1   11.87   10.13
   9  11  -1    3.29    4.80
   8 -11  -1  219.70   17.02
   8 -11  -1  186.63   18.60
   8  11  -1  203.09   12.68
   8  11  -1  184.99   19.70
   8  11  -1  188.86   17.22
   7 -11  -1  297.69   18.85
   7 -11  -1  291.96   19.52
   7  11  -1  271.43   15.14
   7  11  -1  318.68   21.57
   6 -11  -1   33.09    8.90
   6 -11  -1   36.21    8.12
   6  11  -1   32.18    6.65
   6  11  -1   42.02   10.51
   5 -11  -1   30.19    7.71
   5 -11  -1   19.05    7.14
   5  11  -1   16.50    7.82
   5  11  -1   21.41    5.88
   4 -11  -1   19.70    6.33
   4 -11  -1   24.12    6.73
   4  11  -1   14.89    5.40
  -3 -11   1  154.43   10.34
   3 -11  -1  172.46   12.51
   3 -11  -1  174.44   11.25
   3  11  -1  173.88   11.48
  -3  11   1  156.86   12.34
   2 -11  -1   88.13    9.73
   2 -11  -1   99.51    8.29
  -2 -11   1   70.69    7.96
   2 -11  -1   75.75    9.29
   2  11  -1   76.13    9.12
  -2  11   1   73.32    9.08
   1 -11  -1    5.10    4.54
   1 -11  -1    2.71    4.63
  -1 -11   1    0.92    4.36
   1 -11  -1    3.40    3.31
  -1 -11   1   -1.99    3.57
   1  11  -1   -2.18    4.14
  -1  11   1   -3.52    4.65
   0 -11  -1  609.15   25.42
   0 -11   1  604.98   20.10
   0 -11   1  533.38   24.44
   0 -11   1  611.48   23.35
   0 -11  -1  576.84   24.00
   0  11   1  559.98   25.05
   0  11  -1  619.84   25.82
  -1 -11  -1  578.38   23.63
   1 -11   1  549.49   22.93
   1 -11   1  559.98   20.59
  -1 -11  -1  629.52   24.91
   1 -11   1  560.55   24.94
   1  11   1  566.00   24.61
  -1  11  -1  572.58   24.86
   2 -11   1    5.54    5.18
   2 -11   1    3.26    3.23
  -2 -11  -1    3.41    4.37
  -2  11  -1   -0.09    4.56
   2  11   1    3.00    4.49
   3 -11   1  303.46   16.92
  -3 -11  -1  267.38   14.68
   3 -11   1  288.67   13.94
   3  11   1  244.12   14.70
   4 -11   1  290.79   17.50
   4 -11   1  326.73   16.10
   4  11   1  263.94   15.43
   5 -11   1   20.71    7.24
   5 -11   1   18.09    6.23
   5  11   1   27.83    8.41
   5  11   1   24.21    6.49
   6 -11   1   26.49    8.22
   6 -11   1   43.28    8.99
   6  11   1   58.07   11.33
   6  11   1   31.16    7.46
   7 -11   1  200.38   17.92
   7 -11   1  236.59   17.55
   7  11   1  210.15   19.47
   7  11   1  214.99   14.80
   8 -11   1  149.30   15.85
   8 -11   1  110.17   15.12
   8  11   1  162.79   13.93
   8  11   1  145.17   17.25
   9 -11   1   -7.68    7.52
   9 -11   1   16.59    9.86
   9  11   1    6.54    9.91
   9  11   1    7.16    6.50
  10 -11   1   -0.39    8.66
  10 -11   1   -1.97    8.99
  10  11   1    5.46   10.71
  10  11   1    1.67    6.74
  10 -12  -1    3.80    8.56
  10 -12  -1   -4.72    9.43
  10 -12  -1   -7.60    9.27
  10  12  -1   11.44   12.24
   9 -12  -1    1.55    8.26
   9 -12  -1    2.11    8.02
   9 -12  -1    3.67    8.17
   9  12  -1   -9.53    6.12
   9  12  -1   -3.61    4.49
   9  12  -1   16.26   10.90
   8 -12  -1   -6.49    8.11
   8 -12  -1   -0.61    7.13
   8  12  -1  -10.57    7.91
   8  12  -1    4.71    5.02
   7 -12  -1   13.97    8.24
   7 -12  -1   12.84    7.60
   7  12  -1    0.77    4.84
   7  12  -1    2.43    8.46
   6 -12  -1   -9.09    5.90
   6 -12  -1    1.05    6.08
   6  12  -1   -0.57    4.97
   6  12  -1   -1.35    7.28
   5 -12  -1   58.35    9.12
   5 -12  -1   48.90    9.40
   5  12  -1   43.13    7.62
   4 -12  -1   76.81   10.68
   4 -12  -1   65.37    8.94
   4  12  -1   69.65    8.91
  -3 -12   1   -2.19    4.09
   3 -12  -1  -10.21    4.31
   3 -12  -1   -0.16    4.51
  -3  12   1    1.16    4.92
   3  12  -1    3.66    4.80
   2 -12  -1   43.23    7.77
   2 -12  -1   25.01    5.33
  -2 -12   1   40.61    6.92
   2 -12  -1   33.60    7.13
  -2  12   1   29.51    7.57
   2  12  -1   41.32    7.40
  -1 -12   1   48.07    6.66
   1 -12  -1   51.54    8.06
  -1 -12   1   49.54    8.10
   1 -12  -1   36.09    7.98
   1 -12  -1   51.17    5.86
  -1  12   1   54.39    8.31
   1  12  -1   60.70    8.74
   0 -12   1   52.66    8.44
   0 -12   1   52.03    7.05
   0 -12  -1   40.10    7.78
   0 -12  -1   40.30    5.07
   0 -12  -1   42.53    7.05
   0  12  -1   45.68    8.31
   0  12   1   50.61    8.48
   1 -12   1   -3.61    2.39
  -1 -12  -1   -0.10    4.77
   1 -12   1    1.76    4.91
   1 -12   1    5.86    4.42
  -1 -12  -1    7.39    4.88
   1  12   1    6.78    5.31
  -1  12  -1   -4.39    5.24
   2 -12   1  129.29   12.55
  -2 -12  -1   99.66   10.11
   2 -12   1  113.46    7.72
  -2  12  -1  116.41   12.15
   2  12   1  111.83   11.06
  -3 -12  -1   19.24    5.78
   3 -12   1   23.64    5.24
   3 -12   1   -0.11    6.05
   3  12   1   11.62    5.62
   4 -12   1   12.97    5.54
   4 -12   1    2.52    6.22
   4  12   1   10.22    5.68
   5 -12   1  140.62   14.00
   5 -12   1  162.14   13.67
   5  12   1  141.20   12.78
   6 -12   1  117.49   14.07
   6 -12   1  108.69   12.10
   6  12   1   91.02   13.32
   6  12   1   84.89   10.57
   7 -12   1   23.71    9.13
   7 -12   1   -0.56    7.48
   7  12   1   22.48    7.31
   7  12   1   15.26    9.85
   8 -12   1    7.26    8.16
   8 -12   1   -0.37    7.33
   8  12   1    2.49    9.04
   8  12   1   -3.38    5.63
   9 -12   1   10.41    9.50
   9 -12   1   11.68    9.37
   9  12   1   15.46   11.53
   9  12   1   19.30    7.79
  10 -12   1   30.58   10.69
  10 -12   1   18.47   11.43
  10  12   1   28.94   12.64
  10  12   1   31.44    8.19
  10 -13  -1    0.73    8.53
  10 -13  -1    8.88    8.85
  10 -13  -1   -3.04    9.69
  10  13  -1   20.03   11.95
   9 -13  -1   15.33    9.48
   9 -13  -1    4.45    8.83
   9  13  -1    3.95    5.55
   9  13  -1   11.28    8.06
   9  13  -1   -3.35    9.27
   8 -13  -1   42.09   11.35
   8 -13  -1   14.84    8.99
   8  13  -1   43.57    7.93
   8  13  -1   53.61   12.45
   7 -13  -1   -5.04    6.59
   7 -13  -1    0.38    8.09
   7  13  -1   26.72    6.92
   7  13  -1    9.33    9.45
   6 -13  -1   -2.28    6.70
   6 -13  -1    8.24    7.55
   6  13  -1    6.20    5.92
   5 -13  -1   18.76    7.27
   5 -13  -1   18.15    8.01
   5  13  -1   20.51    6.29
   4 -13  -1   42.65    8.01
   4 -13  -1   25.01    7.57
   4  13  -1   49.46    8.24
   3 -13  -1   37.20    8.72
   3 -13  -1   38.04    6.77
  -3  13   1   48.87    9.36
   3  13  -1   40.01    7.69
   2 -13  -1   29.59    5.90
   2 -13  -1   32.15    7.69
  -2 -13   1   23.38    6.23
  -2 -13   1   31.09    6.46
   2 -13  -1   35.43    7.51
   2  13  -1   36.61    7.40
  -2  13   1   37.02    8.36
   1 -13  -1    0.56    3.61
  -1 -13   1    5.92    5.27
   1 -13  -1   -8.43    4.62
  -1 -13   1    6.55    4.65
   1 -13  -1   -8.37    4.37
  -1  13   1   -5.88    5.12
   1  13  -1   -0.97    4.85
   0 -13   1   64.68    7.96
   0 -13  -1   53.43    8.15
   0 -13  -1   64.27    6.14
   0 -13   1   55.61    8.50
   0 -13  -1   54.08    8.31
   0  13   1   68.15   10.25
   0  13  -1   72.67   10.13
   1 -13   1  142.90   11.27
   1 -13   1  157.25   14.08
  -1 -13  -1  175.71   12.18
  -1 -13  -1  182.16   13.07
   1  13   1  181.52   15.31
  -1  13  -1  189.44   15.66
  -2 -13  -1   18.06    6.45
   2 -13   1   10.31    4.09
   2 -13   1    3.42    5.44
  -2 -13  -1    6.55    5.26
   2  13   1    3.43    5.43
  -2  13  -1    0.50    5.18
  -3 -13  -1    7.61    5.64
   3 -13   1    5.88    7.02
   3 -13   1   -1.78    3.86
   3  13   1   10.60    5.85
   4 -13   1   77.70    9.04
   4 -13   1   30.14    8.08
   4  13   1   59.84    9.30
   5 -13   1   46.17    8.38
   5 -13   1   25.72    8.12
   5  13   1   33.12    7.78
   6 -13   1    2.49    6.27
   6 -13   1    5.06    7.31
   6  13   1    3.83    6.13
   6  13   1    0.33    7.74
   7 -13   1   30.91    9.43
   7 -13   1   19.81    8.72
   7  13   1   24.44    8.01
   7  13   1   22.76   10.54
   8 -13   1   21.30    9.79
   8 -13   1   25.87    9.66
   8  13   1   22.24    8.28
   8  13   1   10.10    9.21
   9 -13   1   33.34   11.63
   9 -13   1   23.58   10.08
   9  13   1   24.21    8.23
   9  13   1   41.81   13.54
   9 -14  -1   36.57   11.87
   9 -14  -1   55.38   12.85
   9  14  -1   67.92   12.29
   9  14  -1   49.09   13.76
   9  14  -1   49.12    8.62
   8 -14  -1   21.76    9.51
   8 -14  -1   37.14   11.30
   8  14  -1   23.00    7.26
   7 -14  -1    0.85    7.54
   7 -14  -1    1.71    7.60
   7  14  -1    7.79    6.09
   6 -14  -1   72.76   11.26
   6 -14  -1   71.22   12.24
   6  14  -1   82.97   10.51
   5 -14  -1  153.73   14.11
   5 -14  -1  125.00   14.95
   5  14  -1  112.00   12.01
   4 -14  -1   53.26    8.58
   4 -14  -1   31.95    8.52
   4  14  -1   22.33    7.41
   3 -14  -1   35.14    9.32
   3 -14  -1   64.89    8.53
  -3  14   1   64.80   10.63
   3  14  -1   49.29    8.73
   2 -14  -1  120.53   12.43
   2 -14  -1   97.08   11.89
  -2 -14   1  136.01   11.64
  -2 -14   1  110.99   11.47
   2 -14  -1  126.56    9.52
   2  14  -1   92.97   10.90
  -2  14   1  115.93   13.32
  -1 -14   1  225.79   15.09
   1 -14  -1  236.44   16.03
   1 -14  -1  216.67   14.48
  -1 -14   1  222.86   13.55
  -1  14   1  232.25   16.44
   1  14  -1  198.32   15.03
   0 -14  -1    5.54    5.53
   0 -14   1    5.00    5.67
   0 -14   1    4.62    4.93
   0 -14  -1   15.80    6.68
   0  14  -1   12.28    6.65
   0  14   1    9.38    6.72
  -1 -14  -1  277.10   16.71
   1 -14   1  251.98   16.86
  -1 -14  -1  228.15   15.11
   1 -14   1  267.51   15.18
  -1  14  -1  266.14   17.20
   1  14   1  248.52   16.55
   2 -14   1  390.94   22.00
  -2 -14  -1  443.82   21.06
  -2 -14  -1  418.29   21.35
  -2  14  -1  417.07   22.55
   2  14   1  445.62   22.35
   3 -14   1  101.57   12.83
   3  14   1   87.59   11.23
   4 -14   1   28.79    8.12
   4 -14   1   46.11    7.76
   4  14   1   27.56    7.53
   5 -14   1  213.35   14.58
   5 -14   1  191.05   18.30
   5  14   1  186.92   14.40
   6 -14   1  152.00   14.99
   6 -14   1  154.32   16.98
   6  14   1  143.30   13.98
   7 -14   1   22.79    9.34
   7 -14   1   22.64    8.86
   7  14   1   24.52    7.85
   8 -14   1   -0.99    8.02
   8 -14   1    1.55    7.88
   8  14   1    7.22    9.87
   8  14   1    3.58    6.98
   9 -14   1   76.04   14.29
   9 -14   1   61.43   13.26
   9  14   1   83.85   11.79
   9  14   1   65.05   14.72
   9 -15  -1   10.22    9.89
   9 -15  -1  -12.38    7.97
   9  15  -1   -8.26    7.00
   9  15  -1    1.87    5.94
   8 -15  -1    4.44    8.29
   8 -15  -1   -7.00    7.54
   8  15  -1    4.34    6.31
   7 -15  -1   29.86   10.21
   7 -15  -1   25.44    9.66
   7  15  -1   13.05    7.12
   6 -15  -1   40.47   10.91
   6 -15  -1   42.46    9.95
   6  15  -1   50.42    9.15
   5 -15  -1   -4.94    6.16
   5 -15  -1    4.04    6.92
   5  15  -1   10.16    6.39
   4 -15  -1   39.02    9.23
   4 -15  -1   63.53    9.10
   4  15  -1   60.69    9.81
  -3 -15   1   90.00   10.75
   3 -15  -1   81.60   12.21
  -3  15   1  111.27   13.88
   3  15  -1   89.89   11.69
  -2 -15   1   18.94    6.16
   2 -15  -1   10.82    6.84
   2 -15  -1   17.07    7.09
  -2  15   1    6.48    6.31
   2  15  -1    6.30    6.08
   1 -15  -1    4.74    5.76
  -1 -15   1    1.71    5.81
   1 -15  -1    0.01    6.53
  -1 -15   1    5.50    5.18
   1  15  -1   18.28    7.19
  -1  15   1    2.16    5.83
   0 -15  -1  145.89   13.24
   0 -15  -1  181.20   16.01
   0 -15   1  172.87   15.63
   0 -15   1  178.62   12.49
   0  15   1  191.56   17.11
   0  15  -1  153.73   15.03
  -1 -15  -1   35.66    8.10
  -1 -15  -1   34.98    7.88
   1 -15   1   26.81    7.14
   1 -15   1   32.19    8.01
   1  15   1   31.13    8.53
  -1  15  -1   33.90    8.42
  -2 -15  -1   -3.31    5.22
   2 -15   1    2.87    5.73
  -2 -15  -1    4.19    5.38
  -2  15  -1    4.52    6.47
   2  15   1   -1.43    5.76
   3 -15   1   69.71   11.55
   3  15   1   69.83   10.52
   4 -15   1  111.12   14.03
   4  15   1  147.08   14.47
   5 -15   1    7.03    7.79
   5  15   1   -5.16    5.98
   6 -15   1   22.29    9.41
   6  15   1   35.63    8.68
   7 -15   1   30.29   10.20
   7 -15   1   49.61   10.69
   7  15   1   39.09    9.28
   8 -15   1   32.25   10.92
   8 -15   1    7.35    9.37
   8  15   1   29.02    9.12
   9 -15   1   -7.72    8.48
   9  15   1    8.66   10.33
   9  15   1   -0.80    7.24
   8 -16  -1   -2.57    8.44
   8 -16  -1   -4.74    8.34
   8  16  -1    0.74    6.44
   7 -16  -1   13.55    9.76
   7  16  -1   30.12    8.64
   6 -16  -1   16.46    8.46
   6  16  -1    3.54    7.00
   5 -16  -1   11.74    8.00
   5  16  -1   15.46    7.15
   4 -16  -1   19.05    8.89
   4  16  -1   10.55    6.98
   3 -16  -1   27.96    8.71
  -3 -16   1   38.86    8.26
  -3  16   1   63.52   11.53
   3  16  -1   49.97    9.57
   2 -16  -1   37.96    9.02
   2 -16  -1   30.80    9.14
  -2 -16   1   35.02    7.50
  -2  16   1   53.30   10.54
   2  16  -1   38.14    9.02
   1 -16  -1    9.03    6.80
  -1 -16   1    2.92    6.63
  -1 -16   1   -1.91    5.14
   1 -16  -1    7.95    6.56
   1  16  -1   -3.09    6.40
  -1  16   1    2.61    6.96
   0 -16   1   20.90    7.92
   0 -16  -1    2.68    6.40
   0 -16   1   14.53    6.40
   0 -16  -1   12.05    7.24
   0  16   1   -3.63    6.39
   0  16  -1    5.82    6.54
   1 -16   1   -1.22    5.14
   1 -16   1    5.77    6.69
  -1 -16  -1   -7.19    5.77
  -1 -16  -1   -0.48    5.50
   1  16   1   -3.64    6.23
  -1  16  -1   -2.63    6.34
  -2 -16  -1    6.11    6.26
   2 -16   1   -1.07    6.15
  -2  16  -1    6.36    6.95
   2  16   1   -3.42    5.83
   3 -16   1   29.19    9.22
  -3 -16  -1   41.18    8.85
   3  16   1   35.17    8.70
   4 -16   1    5.90    7.95
   4  16   1    3.44    6.67
   5 -16   1    6.50    8.06
   5  16   1   -1.71    6.25
   6 -16   1   14.34    8.63
   6  16   1   33.79    9.34
   7 -16   1   21.57   10.34
   7  16   1   18.21    8.16
   8 -16   1    1.61    9.06
   8  16   1   15.00    8.36
   8 -17  -1   13.12    9.36
   8  17  -1   27.17    8.81
   7 -17  -1   37.25   11.61
   7  17  -1   43.65    9.37
   6 -17  -1   42.45   11.48
   6  17  -1   22.50    8.53
   5 -17  -1   13.99    8.32
   5  17  -1   18.09    7.64
  -4 -17   1  208.20   17.32
   4 -17  -1  189.33   19.02
   4  17  -1  210.76   15.98
  -3 -17   1  200.36   14.88
   3 -17  -1  170.46   17.81
  -3  17   1  160.83   17.21
   3  17  -1  182.65   16.89
   2 -17  -1   16.86    9.16
   2 -17  -1   24.63    8.38
  -2 -17   1   34.35    8.32
  -2  17   1   36.22    9.96
   2  17  -1   38.70    9.42
   1 -17  -1   76.79   12.58
  -1 -17   1   81.47   10.47
   1 -17  -1   59.44   10.33
   1  17  -1   57.48   11.27
  -1  17   1   79.61   12.79
   0 -17  -1   65.31   10.28
   0 -17  -1   61.18   11.11
   0 -17   1   82.49   10.61
   0 -17   1   72.09   11.62
   0  17  -1   48.54   10.06
   0  17   1   60.40   11.82
  -1 -17  -1   16.03    7.29
   1 -17   1    9.60    7.83
  -1 -17  -1   12.18    7.65
   1 -17   1   17.46    6.96
   1  17   1    4.74    7.44
  -1  17  -1    3.15    6.76
   2 -17   1   18.80    8.98
  -2 -17  -1   11.99    7.16
  -2  17  -1   15.34    8.72
   2  17   1   19.33    8.14
  -3 -17  -1  165.26   15.53
   3 -17   1  149.23   16.56
   3  17   1  189.00   17.46
   4 -17   1  252.33   21.91
   4  17   1  186.56   17.56
   5 -17   1   65.19   12.05
   5  17   1   74.23   11.73
   6 -17   1    8.86    8.47
   6  17   1   -3.49    6.96
   7 -17   1   75.64   14.81
   7  17   1  103.72   13.69
   8 -17   1   16.71    9.80
   8  17   1   41.55   11.04
   7 -18  -1   -4.77    8.62
   7  18  -1    4.61    7.47
   6 -18  -1   15.78   10.32
   6  18  -1   18.82    8.59
   5 -18  -1   40.01   10.70
   5  18  -1   48.76   10.21
  -4 -18   1   10.26    7.40
   4 -18  -1   -4.13    7.18
   4  18  -1    7.55    7.33
   3 -18  -1    9.61    8.35
  -3 -18   1    1.33    6.26
  -3  18   1   11.28    8.56
   3  18  -1    2.11    7.30
  -2 -18   1  147.16   14.22
   2 -18  -1  143.16   16.83
   2 -18  -1  157.19   16.14
   2  18  -1  105.09   14.04
  -2  18   1  124.58   16.06
   1 -18  -1   78.93   12.64
  -1 -18   1   71.03   10.59
   1 -18  -1   78.32   11.81
   1  18  -1   87.08   13.62
  -1  18   1   86.68   13.74
   0 -18  -1   -0.93    6.55
   0 -18  -1   -6.49    7.27
   0 -18   1   10.43    7.23
   0 -18   1   -0.94    5.95
   0  18  -1   -6.48    6.23
   0  18   1   -0.91    7.35
  -1 -18  -1   17.13    7.48
   1 -18   1   -0.46    6.73
   1 -18   1    2.45    6.69
   1  18   1    1.80    7.07
  -1  18  -1   -0.72    7.46
   2 -18   1   70.53   11.76
  -2 -18  -1   70.23   11.20
   2  18   1   78.09   12.78
   3 -18   1   -1.84    7.91
  -3 -18  -1    5.34    7.41
   3  18   1   -7.55    6.24
  -4 -18  -1   68.24   11.79
   4 -18   1   67.51   12.89
   4  18   1   49.41   10.75
   5 -18   1   10.46    9.44
   5  18   1   23.65    9.01
   6 -18   1   26.34   10.91
   6  18   1   11.61    8.75
   7 -18   1   -8.25    8.42
   7  18   1    1.09    7.65
   6 -19  -1    1.93    9.23
   6  19  -1   11.12    7.57
   5 -19  -1   33.14   11.86
   5  19  -1   24.28    9.14
  -4 -19   1   25.90    9.15
   4 -19  -1   20.28   10.07
   4  19  -1   21.12    9.18
   3 -19  -1   10.27    9.40
  -3 -19   1   12.66    8.06
   3  19  -1    0.62    7.59
  -3  19   1   18.38    9.51
  -2 -19   1   14.10    7.78
   2 -19  -1   10.20    8.05
   2 -19  -1   -0.64    7.02
  -2  19   1    2.14    7.94
   2  19  -1    4.37    7.31
   1 -19  -1    1.95    7.45
   1 -19  -1    7.65    7.14
  -1 -19   1    6.67    7.33
   1  19  -1    6.19    7.66
  -1  19   1    8.93    8.94
   0 -19   1  -10.07    5.71
   0 -19  -1    6.23    7.46
   0 -19  -1   -3.05    7.76
   0  19   1   11.27    8.61
   0  19  -1   14.48    8.55
  -1 -19  -1   13.11    7.98
   1 -19   1   14.31    7.82
   1 -19   1    8.90    7.94
  -1  19  -1   10.50    9.09
   1  19   1   22.02    9.66
  -2 -19  -1   20.89    8.77
   2 -19   1    9.75    8.89
   2  19   1    9.17    7.67
  -3 -19  -1   14.21    8.46
   3 -19   1   12.87    9.48
   3  19   1   10.57    8.27
   4 -19   1    1.04    8.81
  -4 -19  -1   12.77    8.27
   4  19   1    2.33    7.71
   5 -19   1    1.85    8.83
   5  19   1  -14.43    6.75
   6 -19   1    7.84    8.32
   6  19   1  -13.59    7.03
   5 -20  -1   33.91   11.84
   5  20  -1   22.05   10.20
   4 -20  -1    5.64    9.58
   4  20  -1   18.69    9.10
   3 -20  -1   55.53   13.05
   3  20  -1   67.81   11.82
  -3  20   1   42.72   11.72
   2 -20  -1  131.28   17.13
  -2 -20   1  126.82   14.43
   2 -20  -1  128.48   14.79
  -2  20   1  117.38   15.92
   2  20  -1   92.02   14.32
  -1 -20   1   43.30    9.95
   1 -20  -1   23.11    8.57
   1 -20  -1   23.69   10.56
   1  20  -1   27.96   10.38
  -1  20   1   23.00    9.98
   0 -20   1   -3.49    6.45
   0 -20  -1   -0.68    7.08
   0  20   1   -2.34    7.47
   0  20  -1    5.79    8.19
   1 -20   1  136.09   14.94
  -1 -20  -1  177.13   17.63
   1 -20   1  124.22   15.78
   1  20   1  159.27   19.14
  -1  20  -1  166.24   19.25
   2 -20   1   90.56   15.37
  -2 -20  -1   91.35   13.11
   2  20   1  106.10   15.50
   3 -20   1   17.91    9.73
  -3 -20  -1   13.50    8.93
   3  20   1    7.99    8.52
   4 -20   1    1.31    9.67
  -4 -20  -1    4.17    8.06
   4  20   1   -1.80    8.46
   5 -20   1   15.40   11.08
  -5 -20  -1   14.07    9.80
   5  20   1   13.12    8.73
   4 -21  -1    4.90   10.17
   4  21  -1    6.26    9.12
   3 -21  -1   27.38   10.79
   3  21  -1   30.97   10.46
   2 -21  -1    7.29    9.49
  -2  21   1    9.76    8.77
   2  21  -1    5.11    8.25
   1 -21  -1   -1.79    8.74
   1 -21  -1  -20.68    6.61
  -1  21   1   -0.59    7.86
   1  21  -1    8.58    8.33
   0 -21  -1   64.02   12.22
   0  21   1   44.54   11.64
   0  21  -1   43.62   11.30
  -1 -21  -1   20.79    8.86
   1 -21   1   19.13    8.56
   1  21   1   19.52    9.76
  -1  21  -1   20.92   10.81
   2 -21   1    0.68    9.01
  -2 -21  -1   -3.77    7.68
   2  21   1    1.03    8.21
  -3 -21  -1   21.73    9.78
   3 -21   1    2.54    8.30
   3  21   1    3.80    8.04
   4 -21   1    3.74    9.04
  -4 -21  -1   16.10    9.81
   4  21   1   13.24    8.48
   3 -22  -1    6.85    9.69
   3  22  -1   -0.19    7.94
   2 -22  -1    7.95    9.68
  -2  22   1   14.08   10.73
   2  22  -1    4.92    8.40
   1 -22  -1    2.12    8.49
   1  22  -1   10.33    9.58
  -1  22   1   26.28   11.24
   0 -22  -1    4.43    8.47
   0  22  -1   18.18   10.16
   0  22   1   -3.80    7.50
  -1 -22  -1   -0.29    8.67
   1  22   1    8.00    8.38
  -2 -22  -1   23.28    9.78
   2  22   1   12.54    9.68
   3 -22   1    8.37   10.50
  -3 -22  -1    4.23    9.37
   3  22   1    9.72    9.33
  12   0  -2   -8.63   10.04
  11   0  -2   37.53   11.79
  11   0  -2   34.88   12.48
  10   0  -2   -1.60    8.61
  10   0  -2    0.29    4.34
  10   0  -2   13.64    9.62
   9   0  -2    4.56    7.30
   9   0  -2    7.76    4.11
   9   0  -2    9.13    8.56
   8   0  -2   26.95    8.43
   8   0  -2   30.92    8.65
   8   0  -2   49.92    5.89
   7   0  -2  401.85   20.57
   7   0  -2  403.02   17.08
   7   0  -2  399.23   16.04
   7   0  -2  403.28   21.14
   6   0  -2  439.73   16.79
   6   0  -2  438.49   21.22
   6   0  -2  454.76   18.01
   5   0  -2    4.35    3.30
   5   0  -2    9.16    4.83
   5   0  -2    1.82    4.28
   5   0  -2    7.46    2.70
   4   0  -2  237.64    9.43
   4   0  -2  241.76   12.58
   4   0  -2  253.58   11.30
   3   0  -2  962.47   34.20
   3   0  -2  981.96   33.10
   3   0  -2  969.12   31.16
   3   0  -2  959.64   32.71
   3   0  -2  965.39   31.17
   2   0  -2   56.67    5.47
   2   0  -2   60.21    3.19
   2   0  -2   67.52    5.37
   2   0  -2   61.37    3.27
   2   0  -2   71.58    5.33
  -1   0   2  211.83    7.56
   1   0  -2  209.06    8.79
   1   0  -2  220.96    7.70
   1   0  -2  205.58    7.90
   1   0  -2  216.02    7.73
   0   0   2  887.22   28.89
   1   0   2 8337.30  260.15
   2   0   2  187.63    9.00
   3   0   2  280.37   12.26
   3   0   2  284.56   12.76
   4   0   2  417.28   17.66
   4   0   2  408.40   16.79
   5   0   2 1046.92   32.99
   5   0   2 1001.60   36.27
   5   0   2 1001.51   37.35
   6   0   2   34.15    5.87
  -6   0  -2   34.75    5.80
   6   0   2   28.00    6.48
   7   0   2   59.75    7.89
   7   0   2   65.95   10.05
   8   0   2  116.92   10.76
   8   0   2   94.77   12.26
   9   0   2  112.16   11.65
   9   0   2   90.94   13.55
  10   0   2    6.98    8.63
  10   0   2   -0.92    6.18
  11   0   2   77.81   10.81
  11   0   2   43.51   12.13
  12  -1  -2   21.37   11.38
  12   1  -2   11.99   10.38
  11  -1  -2   12.18   10.41
  11  -1  -2   -3.92    9.84
  11  -1  -2   -3.52    5.02
  11   1  -2   12.83    9.98
  10  -1  -2   19.45    9.24
  10  -1  -2    7.59    9.42
  10  -1  -2   16.05    5.13
  10   1  -2   17.32    4.85
  10   1  -2   12.69    9.44
  10   1  -2   11.77    9.35
   9  -1  -2   10.82    8.21
   9  -1  -2   24.75    5.31
   9  -1  -2    5.81    8.28
   9   1  -2   22.71    9.32
   9   1  -2   25.04    8.97
   9   1  -2   13.37    4.28
   8  -1  -2   19.96    4.88
   8  -1  -2   23.58    8.11
   8  -1  -2   10.12    7.18
   8   1  -2   13.93    7.16
   8   1  -2   15.44    7.17
   8   1  -2   14.34    4.00
   7  -1  -2   -3.05    4.72
   7  -1  -2    1.36    6.38
   7  -1  -2    4.07    3.40
   7  -1  -2    3.20    3.20
   7   1  -2    7.00    6.42
   7   1  -2    2.97    3.58
   7   1  -2   -0.62    2.86
   7   1  -2    1.74    6.02
   6  -1  -2   58.27    8.22
   6  -1  -2   65.64    5.89
   6  -1  -2   71.21    6.31
   6  -1  -2   71.38    6.03
   6  -1  -2   50.59    8.57
   6   1  -2   61.68    5.06
   6   1  -2   76.21    9.20
   6   1  -2   53.98    8.34
   6   1  -2   86.92    7.47
   5  -1  -2  316.04   13.24
   5  -1  -2  307.24   15.81
   5  -1  -2  308.70   12.51
   5  -1  -2  305.37   12.56
   5  -1  -2  308.31   15.17
   5   1  -2  308.41   11.68
   5   1  -2  324.38   13.84
   5   1  -2  320.53   15.70
   5   1  -2  303.28   15.35
   4  -1  -2  101.19    7.62
   4  -1  -2   96.93    6.68
   4  -1  -2   93.31    5.55
   4  -1  -2   91.43    5.62
   4  -1  -2  103.71    9.14
   4   1  -2   97.38    8.62
   4   1  -2   89.81    4.70
   4   1  -2   97.10    8.49
   4   1  -2   85.50    6.87
   3  -1  -2   75.08    5.88
   3  -1  -2   74.88    6.26
   3  -1  -2   72.01    4.71
   3  -1  -2   88.89    7.80
   3  -1  -2   83.57    4.95
   3   1  -2   78.53    6.80
   3   1  -2   82.53    3.54
   3   1  -2   86.05    6.51
   3   1  -2   86.79    7.20
   2  -1  -2   42.05    3.43
   2  -1  -2   46.86    4.31
   2  -1  -2   34.49    4.65
   2  -1  -2   43.27    4.51
   2  -1  -2   39.06    3.33
   2   1  -2   39.66    4.66
  -2   1   2   40.38    3.24
   2   1  -2   41.59    4.74
   2   1  -2   43.84    4.85
  -1  -1   2  236.63    8.29
   1  -1  -2  237.11    9.27
   1  -1  -2  232.26    8.42
   1  -1  -2  245.63    9.05
   1  -1  -2  243.11    9.12
   1   1  -2  247.02    9.90
  -1   1   2  242.21    8.91
   1   1  -2  238.85    9.22
   1   1  -2  251.21    8.49
   0  -1   2    3.99    2.06
   0  -1  -2    4.15    2.42
   0   1   2    2.80    2.06
   0   1  -2    5.48    2.17
   1  -1   2  942.22   31.10
  -1  -1  -2  886.25   30.94
   1   1   2  901.90   30.92
   1   1   2  946.24   30.02
  -1   1  -2  983.31   29.88
  -2  -1  -2  314.31   12.66
   2  -1   2  310.71   12.61
   2   1   2  306.25   12.60
   2   1   2  303.20   12.38
   3  -1   2  112.19    7.72
  -3  -1  -2  129.42    7.60
   3   1   2  132.98    7.89
   3   1   2  117.31    7.53
   4  -1   2   -0.81    3.59
   4  -1   2   -0.81    3.67
  -4  -1  -2    2.20    3.27
   4   1   2   -0.62    3.31
   4   1   2    1.16    4.06
   5  -1   2   81.54    7.65
   5  -1   2   72.41    8.45
  -5  -1  -2   86.60    7.56
   5   1   2   72.52    8.50
   5   1   2   66.25    6.99
  -6  -1  -2  128.21    8.67
   6  -1   2  104.31   10.61
   6  -1   2  121.51    9.02
   6   1   2  113.79    8.68
   6   1   2  115.28    6.19
   6   1   2  109.14   10.74
   7  -1   2   10.33    6.14
   7  -1   2   -1.99    4.38
   7   1   2   -1.83    5.84
   7   1   2    6.48    4.96
   8  -1   2    0.57    5.14
   8  -1   2  -12.07    6.10
   8   1   2   10.36    6.55
   8   1   2    8.46    5.37
   9  -1   2  102.21   11.35
   9  -1   2  104.95   14.23
   9   1   2  103.31   13.92
   9   1   2   88.11   10.62
  10  -1   2   10.41    9.37
  10  -1   2   22.06    7.61
  10   1   2   29.79    7.45
  10   1   2   17.87    9.91
  11  -1   2   10.69    7.58
  11  -1   2   -6.29    8.22
  11   1   2    6.94    7.01
  11   1   2   -6.00    9.19
  12  -2  -2   -6.52   10.17
  12   2  -2    5.34   11.15
  11  -2  -2   46.07   13.27
  11  -2  -2   48.78    7.86
  11  -2  -2   35.65   12.18
  11   2  -2   20.11   10.58
  10  -2  -2  114.19   15.33
  10  -2  -2   90.91    9.27
  10  -2  -2   95.48   14.57
  10   2  -2   77.14   13.35
  10   2  -2  114.75    8.27
  10   2  -2   88.22   14.30
   9  -2  -2    3.21    4.26
   9  -2  -2    5.29    8.32
   9  -2  -2    3.87    7.35
   9   2  -2    6.47    3.83
   9   2  -2    4.45    7.03
   9   2  -2    1.32    7.72
   8  -2  -2   28.72    9.49
   8  -2  -2   16.61    5.09
   8  -2  -2   28.66    8.58
   8   2  -2   19.60    8.14
   8   2  -2   18.29    7.87
   8   2  -2   16.02    5.03
   8   2  -2   24.76    4.15
   7  -2  -2   70.26   10.17
   7  -2  -2   93.70    7.39
   7  -2  -2  112.35   12.01
   7   2  -2   81.45   10.93
   7   2  -2   77.90   10.69
   7   2  -2   81.12    5.98
   7   2  -2   94.36    8.55
   6  -2  -2   44.94    7.20
   6  -2  -2   59.65    9.03
   6  -2  -2   50.95    5.73
   6   2  -2   52.64    6.25
   6   2  -2   50.27    8.10
   6   2  -2   37.34    7.04
   6   2  -2   50.06    4.34
   5  -2  -2   28.80    4.25
   5  -2  -2   29.52    4.12
   5  -2  -2   21.53    5.57
   5  -2  -2   28.93    6.54
   5   2  -2   24.14    5.88
   5   2  -2   24.47    4.68
   5   2  -2   23.45    6.25
   5   2  -2   27.43    3.04
   4  -2  -2  137.82   10.08
   4  -2  -2  129.06    8.81
   4  -2  -2  143.75    7.67
   4  -2  -2  136.59    7.38
   4   2  -2  148.13    8.83
   4   2  -2  151.12    9.36
   4   2  -2  137.24    5.78
   4   2  -2  149.90    9.60
   3  -2  -2  202.60   10.63
   3  -2  -2  204.98    9.88
   3  -2  -2  191.81    8.78
   3  -2  -2  200.99    8.96
   3   2  -2  185.47   10.29
   3   2  -2  197.28   10.09
   3   2  -2  193.74   10.00
   3   2  -2  198.94    6.87
   2  -2  -2  316.76   13.20
   2  -2  -2  284.64   11.56
   2  -2  -2  293.27   11.57
   2  -2  -2  289.54   11.49
   2   2  -2  284.48   12.43
   2   2  -2  310.24   10.05
   2   2  -2  309.41   10.03
   2   2  -2  297.03   12.54
   2   2  -2  306.89   12.11
  -2   2   2  301.82   11.52
  -1  -2   2  342.65   11.73
   1  -2  -2  353.01   12.78
   1  -2  -2  348.65   12.87
   1   2  -2  346.74   13.20
  -1   2   2  326.66   12.44
   1   2  -2  336.07   11.79
   1   2  -2  329.74   12.21
   0  -2  -2  646.28   21.75
   0  -2   2  644.64   21.43
   0   2   2  601.71   21.55
   0   2  -2  635.83   21.40
   1  -2   2   74.11    5.72
  -1  -2  -2   65.60    5.25
   1   2   2   53.56    4.77
   1   2   2   59.02    4.48
  -1   2  -2   63.12    4.04
   2  -2   2  287.67   12.95
  -2  -2  -2  311.49   12.79
   2   2   2  320.48   12.68
   2   2   2  320.93   12.86
  -3  -2  -2   87.68    6.76
   3  -2   2   75.76    6.97
   3   2   2   69.94    6.19
   3   2   2   74.38    7.01
   4  -2   2  176.55   10.05
  -4  -2  -2  174.50    9.53
   4   2   2  179.44    9.81
   4   2   2  184.01   10.54
   5  -2   2   20.14    4.79
   5  -2   2   14.55    5.61
  -5  -2  -2   15.77    4.30
   5   2   2   24.06    6.02
   5   2   2   21.16    4.83
   6  -2   2    5.29    5.62
   6  -2   2    4.75    4.29
  -6  -2  -2    3.73    3.73
   6   2   2    5.03    4.15
   6   2   2    2.06    5.17
   7  -2   2    6.12    6.58
   7  -2   2    6.96    5.03
   7   2   2    2.52    4.68
   7   2   2   14.51    6.96
   8  -2   2    9.86    6.48
   8  -2   2   -2.28    4.85
   8   2   2    3.66    5.12
   8   2   2    8.09    6.41
   9  -2   2    6.20    6.07
   9  -2   2   10.30    8.08
   9   2   2   -0.67    5.72
   9   2   2    3.20    7.57
  10  -2   2   17.26    9.69
  10  -2   2   -4.05    6.29
  10   2   2   -4.62    5.82
  10   2   2   -5.89    7.23
  11  -2   2   16.02    8.14
  11  -2   2    3.99    9.72
  11   2   2    5.79   10.19
  11   2   2   35.29    8.45
  12  -3  -2   16.60   10.85
  12  -3  -2   30.47   13.17
  12   3  -2   19.37   11.95
  11  -3  -2   13.18    6.20
  11  -3  -2    7.09    9.79
  11  -3  -2   16.54   10.66
  11   3  -2   -4.62    7.99
  10  -3  -2    2.33    8.63
  10  -3  -2   16.38    9.73
  10  -3  -2   -6.85    4.57
  10   3  -2   -2.43    8.09
   9  -3  -2  119.98   14.50
   9  -3  -2  113.00   15.92
   9  -3  -2  128.55   10.89
   9   3  -2  113.99   14.58
   9   3  -2  131.36   15.18
   9   3  -2  123.72    8.23
   8  -3  -2   31.85    8.56
   8  -3  -2   31.37    9.47
   8  -3  -2   25.07    5.95
   8   3  -2   23.52    8.19
   8   3  -2   17.08    7.93
   8   3  -2   38.33    6.29
   8   3  -2   26.47    4.29
   7  -3  -2    2.49    5.36
   7  -3  -2  -11.74    5.87
   7  -3  -2    2.05    4.15
   7   3  -2    4.76    6.28
   7   3  -2   -2.57    3.28
   7   3  -2    5.99    5.36
   7   3  -2   -1.46    2.45
   6  -3  -2  172.86   10.22
   6  -3  -2  183.05   12.28
   6  -3  -2  195.68   13.09
   6   3  -2  164.46   10.41
   6   3  -2  174.26   12.15
   6   3  -2  171.91   11.87
   6   3  -2  179.60    8.13
   5  -3  -2  982.24   34.61
   5  -3  -2  966.96   35.99
   5  -3  -2  992.66   37.88
   5   3  -2  982.39   35.30
   5   3  -2  989.75   36.67
   5   3  -2 1003.76   32.53
   5   3  -2 1011.86   37.08
   4  -3  -2  358.79   15.56
   4  -3  -2  352.64   16.96
   4  -3  -2  364.89   14.84
   4   3  -2  339.13   15.58
   4   3  -2  359.73   12.57
   4   3  -2  354.79   16.44
   4   3  -2  373.45   12.63
   4   3  -2  354.14   15.66
   3  -3  -2    3.22    3.77
   3  -3  -2    2.44    3.12
  -3   3   2    6.08    2.97
   3   3  -2    2.99    3.81
   3   3  -2   -1.43    1.70
   3   3  -2    1.21    3.00
   3   3  -2   -7.52    3.33
   3   3  -2   -1.64    1.50
   2  -3  -2  731.84   26.45
   2  -3  -2  700.43   25.27
  -2  -3   2  738.92   23.67
   2   3  -2  719.42   25.13
   2   3  -2  743.81   26.04
  -2   3   2  757.09   25.40
   2   3  -2  726.32   23.93
   2   3  -2  730.43   23.97
  -1  -3   2 9999.00  303.02
   1  -3  -2 9773.82  303.93
  -1   3   2 9536.97  303.80
   1   3  -2 9875.35  303.13
   1   3  -2 9733.26  306.13
   1   3  -2 9475.90  306.18
   0  -3   2    3.45    2.64
   0  -3  -2    3.99    3.39
   0  -3   2    1.96    1.60
   0   3   2    0.99    2.99
  -1  -3  -2   71.91    5.74
   1  -3   2   73.13    5.65
   1   3   2   85.37    6.32
   1   3   2   76.72    5.21
   2  -3   2  581.67   21.93
  -2  -3  -2  562.11   21.42
   2   3   2  616.28   21.77
   2   3   2  599.21   21.32
  -2   3  -2  599.98   19.52
  -3  -3  -2  486.56   19.06
   3  -3   2  503.15   19.79
   3  -3   2  516.79   20.23
   3   3   2  502.41   19.51
   3   3   2  501.55   19.14
   4  -3   2   86.74    8.41
  -4  -3  -2   84.82    7.07
   4  -3   2   82.18    7.72
   4   3   2   79.89    8.21
   4   3   2   75.10    6.93
   5  -3   2  249.82   14.22
  -5  -3  -2  231.73   11.63
   5  -3   2  221.21   12.74
   5   3   2  234.32   13.59
   5   3   2  246.95   12.13
  -6  -3  -2  286.38   13.84
   6  -3   2  301.64   16.70
   6  -3   2  303.01   15.42
   6   3   2  298.46   16.56
   6   3   2  277.48   14.16
   7  -3   2  169.19   11.76
   7  -3   2  166.55   15.07
   7   3   2  151.14   10.76
   7   3   2  163.52    9.19
   7   3   2  177.70   15.42
   8  -3   2   35.02    7.51
   8  -3   2   27.52    8.65
   8   3   2   25.86    6.56
   8   3   2   22.90    8.56
   9  -3   2  112.81   14.54
   9  -3   2   97.71   11.33
   9   3   2  111.62   14.72
   9   3   2  121.46   11.52
  10  -3   2  115.92   15.87
  10  -3   2  115.85   12.90
  10   3   2  125.26   16.03
  10   3   2  114.13   11.96
  11  -3   2   17.81    9.78
  11  -3   2   -2.67    7.27
  11   3   2   24.85    7.94
  11   3   2   29.74   11.66
  11  -4  -2   48.00   13.07
  11  -4  -2   38.51    7.90
  11  -4  -2   38.21   12.70
  11   4  -2   43.13   12.56
  10  -4  -2    7.38   10.29
  10  -4  -2    5.05    5.36
  10  -4  -2   15.47    9.50
  10   4  -2    2.96    8.82
   9  -4  -2   19.79    8.91
   9  -4  -2   21.96    6.56
   9  -4  -2   15.02    8.60
   9   4  -2   22.63    4.40
   9   4  -2    5.93    8.64
   8  -4  -2   -0.22    6.55
   8  -4  -2   19.71    5.95
   8  -4  -2   19.43    9.16
   8   4  -2   23.68    4.05
   8   4  -2   13.58    7.70
   8   4  -2   16.33    5.20
   8   4  -2    1.89    7.42
   7  -4  -2   51.41    7.11
   7  -4  -2   55.53    9.08
   7  -4  -2   64.55   10.78
   7   4  -2   62.67    5.43
   7   4  -2   63.54    9.50
   7   4  -2   51.53    7.02
   7   4  -2   52.08    9.33
   6  -4  -2   73.93    9.72
   6  -4  -2   76.52    9.50
   6  -4  -2   62.45    7.22
   6   4  -2   55.25    7.13
   6   4  -2   55.62    9.17
   6   4  -2   60.77    4.73
   6   4  -2   50.47    7.59
   5  -4  -2   -2.39    4.07
   5  -4  -2   -0.31    3.52
   5  -4  -2    4.16    5.27
   5   4  -2   -1.91    2.06
   5   4  -2    5.77    4.20
   5   4  -2    2.56    4.34
   5   4  -2    0.22    5.05
   4  -4  -2   50.52    6.94
   4  -4  -2   65.01    6.47
   4   4  -2   47.61    6.19
   4   4  -2   52.95    6.42
   4   4  -2   54.95    3.77
   4   4  -2   56.44    4.11
   4   4  -2   36.79    6.22
   3  -4  -2   16.45    5.07
   3  -4  -2   17.71    4.09
   3   4  -2   15.82    5.17
   3   4  -2   20.85    2.90
   3   4  -2   16.84    2.60
   3   4  -2   16.49    3.76
  -3   4   2   26.10    4.25
  -2  -4   2    3.25    2.17
   2  -4  -2    4.28    3.44
   2  -4  -2    0.93    3.25
   2   4  -2    0.23    2.42
   2   4  -2    1.24    3.85
   2   4  -2    2.34    2.37
  -2   4   2    3.62    3.33
   2   4  -2   -1.46    2.20
  -1  -4   2   28.63    3.64
   1  -4  -2   17.43    4.20
   1  -4  -2   15.77    3.78
   1   4  -2   22.36    3.53
  -1   4   2   23.29    4.31
   1   4  -2   24.42    2.16
   0  -4  -2  214.08   10.57
   0  -4  -2  227.09   10.06
   0  -4   2  218.47    9.75
   0  -4   2  216.49    8.20
   0   4   2  192.76    9.82
   1  -4   2  201.91   10.14
  -1  -4  -2  215.59   10.31
   1   4   2  202.96    9.25
   1   4   2  210.97   10.18
   2  -4   2   -1.45    3.06
  -2  -4  -2   -2.27    3.14
   2  -4   2   -2.99    3.06
   2   4   2    0.22    3.52
   2   4   2    0.89    3.52
   3  -4   2  241.52   12.20
   3  -4   2  238.42   12.00
  -3  -4  -2  261.98   11.59
   3   4   2  227.39   11.57
   3   4   2  232.75   11.39
   4  -4   2  337.93   15.61
  -4  -4  -2  301.21   13.70
   4  -4   2  311.71   14.91
   4   4   2  323.17   15.24
   4   4   2  297.39   14.08
  -5  -4  -2  179.85   10.13
   5  -4   2  192.59   11.63
   5  -4   2  191.22   12.71
   5   4   2  187.64   12.37
   5   4   2  193.21   10.77
   6  -4   2    7.90    5.77
   6  -4   2    1.99    4.82
   6   4   2   13.10    6.07
   6   4   2    0.52    3.80
   7  -4   2   23.60    7.67
   7  -4   2   19.68    6.43
   7   4   2   30.99    6.17
   7   4   2   33.66    8.53
   8  -4   2   60.72   10.59
   8  -4   2   64.69    9.22
   8   4   2   71.58   11.50
   8   4   2   77.84    9.25
   9  -4   2   18.94    7.43
   9  -4   2   22.03    8.93
   9   4   2   26.23    9.54
   9   4   2   21.55    6.99
  10  -4   2    5.35    6.73
  10  -4   2    4.82    9.34
  10   4   2    2.57    8.86
  10   4   2    3.43    6.22
  11  -4   2   25.26    8.71
  11  -4   2   30.95   11.84
  11   4   2   32.16    8.39
  11   4   2   28.37   11.61
  11  -5  -2    6.32    6.37
  11  -5  -2  -17.27    8.33
  11  -5  -2    4.07    8.95
  11   5  -2    4.15    9.88
  10  -5  -2    8.90    6.68
  10  -5  -2   -1.84    8.76
  10  -5  -2    9.95    9.91
  10   5  -2    1.66    9.49
   9  -5  -2    9.17    5.98
   9  -5  -2   21.41   10.14
   9  -5  -2    7.51    8.16
   9   5  -2   11.99    8.73
   9   5  -2    9.09    3.62
   8  -5  -2  147.18   15.61
   8  -5  -2  180.32   12.65
   8  -5  -2  150.39   14.82
   8   5  -2  174.63   16.95
   8   5  -2  172.88   12.16
   8   5  -2  192.90    9.36
   7  -5  -2  159.87   14.35
   7  -5  -2  186.44   16.17
   7  -5  -2  167.35   11.64
   7   5  -2  163.85   12.95
   7   5  -2  153.74    8.40
   7   5  -2  169.46   15.49
   7   5  -2  192.92   11.87
   6  -5  -2   49.77    7.96
   6  -5  -2   44.68    8.12
   6  -5  -2   50.75    7.00
   6   5  -2   43.33    8.21
   6   5  -2   39.91    7.30
   6   5  -2   46.50    7.19
   6   5  -2   47.71    4.58
   5  -5  -2    4.06    4.85
   5  -5  -2    3.36    4.01
   5   5  -2   -2.63    4.70
   5   5  -2    1.55    2.31
   5   5  -2   -1.74    4.08
   5   5  -2    1.35    1.89
   5   5  -2   -5.74    3.51
   4  -5  -2   10.35    4.85
   4  -5  -2   13.61    4.45
   4   5  -2    5.70    3.57
   4   5  -2   14.70    2.95
   4   5  -2    8.41    4.93
   4   5  -2   12.08    2.41
   3  -5  -2   42.41    5.96
  -3  -5   2   43.19    3.88
   3  -5  -2   42.83    5.55
   3   5  -2   44.76    4.18
   3   5  -2   47.93    7.03
   3   5  -2   41.76    4.73
  -3   5   2   39.48    5.48
   3   5  -2   48.66    4.44
   2  -5  -2  669.84   24.55
   2  -5  -2  663.85   24.56
   2  -5  -2  665.93   24.77
  -2  -5   2  661.97   22.89
   2   5  -2  671.90   23.22
   2   5  -2  671.14   22.70
   2   5  -2  660.88   23.16
  -2   5   2  627.83   24.27
  -1  -5   2   27.08    3.98
   1  -5  -2   30.32    5.18
   1  -5  -2   34.77    5.49
  -1   5   2   24.83    4.49
   1   5  -2   31.21    4.25
   0  -5  -2   79.15    6.74
   0  -5  -2   65.52    6.07
   0  -5   2   61.49    5.85
   0  -5   2   71.91    4.86
   0   5  -2   73.46    5.83
   0   5   2   77.38    6.75
  -1  -5  -2   74.25    6.96
   1  -5   2   67.23    6.38
   1   5   2   85.16    7.12
   1   5   2   74.90    5.88
  -2  -5  -2   15.34    4.16
   2  -5   2   12.87    4.13
   2  -5   2   14.63    3.78
   2   5   2   15.09    4.39
   2   5   2    8.14    3.85
   3  -5   2   57.02    6.41
  -3  -5  -2   46.87    5.86
   3  -5   2   58.18    7.09
   3   5   2   51.68    6.84
   3   5   2   49.00    5.86
   4  -5   2  115.40    8.76
   4  -5   2  113.73    9.16
  -4  -5  -2  107.14    8.07
   4   5   2  121.34    8.54
   4   5   2  136.99   10.84
  -5  -5  -2    9.33    4.10
   5  -5   2   17.03    5.08
   5  -5   2    8.44    5.53
   5   5   2   12.89    4.28
   5   5   2    3.05    4.49
   6  -5   2   19.55    6.15
   6  -5   2   14.48    5.98
   6   5   2    8.17    5.62
   6   5   2   11.46    4.76
   7  -5   2   14.91    6.41
   7  -5   2    9.54    6.15
   7  -5   2    8.76    7.04
   7   5   2   10.52    5.28
   7   5   2    0.32    6.42
   8  -5   2   -3.01    6.93
   8  -5   2   11.71    6.36
   8   5   2   -3.60    6.99
   8   5   2    5.57    5.61
   9  -5   2   19.84    7.67
   9  -5   2   14.53    8.52
   9   5   2   10.80    8.00
   9   5   2    6.47    6.22
  10  -5   2    2.20    6.74
  10  -5   2   -6.71    6.87
  10   5   2   18.62    9.87
  10   5   2    8.99    6.49
  11  -5   2  -16.55    8.28
  11  -5   2   11.80    7.86
  11   5   2    2.82    9.47
  11   5   2   -5.32    6.66
  11  -6  -2   43.55   12.45
  11  -6  -2   53.11    9.41
  11  -6  -2   47.31   12.80
  11   6  -2   33.62   12.65
  10  -6  -2   38.43   12.49
  10  -6  -2   38.53    8.79
  10  -6  -2   45.21   11.94
  10   6  -2   30.30   10.32
   9  -6  -2    5.83    8.27
   9  -6  -2    3.24    8.57
   9  -6  -2    4.34    5.90
   9   6  -2   -4.72    3.07
   9   6  -2    6.51    9.42
   8  -6  -2   11.29    7.58
   8  -6  -2   11.55    5.94
   8  -6  -2    3.91    7.76
   8   6  -2    9.31    5.23
   8   6  -2    9.92    8.00
   8   6  -2   10.60    3.57
   7  -6  -2  182.97   14.34
   7  -6  -2  191.88   12.73
   7  -6  -2  175.47   15.75
   7   6  -2  187.04    9.20
   7   6  -2  171.47   16.32
   7   6  -2  177.14   12.61
   6  -6  -2   31.32    7.51
   6  -6  -2   30.50    6.69
   6  -6  -2   44.68    7.91
   6   6  -2   43.29    8.64
   6   6  -2   44.12    7.12
   6   6  -2   45.18    7.21
   6   6  -2   41.95    4.66
   5  -6  -2    3.72    5.51
   5  -6  -2   -1.74    4.14
   5   6  -2    3.09    3.78
   5   6  -2    3.33    4.57
   5   6  -2   -2.85    5.33
   5   6  -2    4.85    2.18
   5   6  -2    6.51    2.92
   4  -6  -2  535.51   21.12
  -4  -6   2  480.46   17.71
   4  -6  -2  534.94   22.05
   4   6  -2  507.30   18.54
   4   6  -2  474.36   18.21
   4   6  -2  505.99   19.99
   4   6  -2  501.44   21.98
   3  -6  -2 3344.56  110.55
   3  -6  -2 3397.17  112.15
  -3  -6   2 3462.27  108.34
   3   6  -2 3370.91  110.02
   3   6  -2 3372.04  109.93
   3   6  -2 3431.83  108.79
   3   6  -2 3477.42  108.86
  -3   6   2 3476.39  110.67
   2  -6  -2   40.83    5.67
   2  -6  -2   32.67    6.00
   2  -6  -2   33.15    5.36
  -2  -6   2   38.78    4.40
  -2   6   2   33.26    5.21
   2   6  -2   36.68    4.74
   1  -6  -2  279.65   13.07
   1  -6  -2  283.40   13.62
  -1  -6   2  273.00   12.22
  -1   6   2  306.00   13.71
   1   6  -2  286.04   12.64
   0  -6  -2  232.46   11.82
   0  -6   2  219.80   10.90
   0  -6  -2  221.73   11.36
   0  -6   2  225.15    9.60
   0   6   2  218.92   11.15
   0   6  -2  228.80   11.34
  -1  -6  -2  205.82   10.94
   1  -6   2  208.23   10.98
   1   6   2  188.78   10.74
  -2  -6  -2    3.57    4.01
   2  -6   2   10.09    4.58
   2  -6   2    9.95    3.60
   2   6   2   11.98    4.43
   2   6   2    5.83    4.02
  -3  -6  -2  112.88    8.24
   3  -6   2  144.02    8.71
   3  -6   2  122.41    9.36
   3   6   2  135.25    8.73
   3   6   2  129.41    9.38
   4  -6   2  553.64   23.63
  -4  -6  -2  568.24   22.18
   4  -6   2  546.38   23.21
   4   6   2  583.42   23.71
   4   6   2  581.85   22.63
   5  -6   2  199.44   12.63
  -5  -6  -2  172.56   10.63
   5  -6   2  223.92   13.27
   5   6   2  193.34   11.40
   5   6   2  183.70   12.45
   6  -6   2    0.77    4.91
   6  -6   2    9.15    6.31
   6   6   2    1.57    4.26
   6   6   2   -0.94    5.88
   7  -6   2   73.12    9.91
   7  -6   2   91.25   11.47
   7   6   2   89.75    9.68
   7   6   2   77.16   11.52
   8  -6   2  223.48   15.80
   8  -6   2  198.02   18.22
   8   6   2  245.38   17.93
   8   6   2  223.02   14.48
   9  -6   2   42.97   11.23
   9  -6   2   16.96    7.90
   9   6   2    5.46    9.02
   9   6   2   13.39    7.00
  10  -6   2   22.50    8.48
  10  -6   2   16.93   10.13
  10   6   2   21.47   10.40
  10   6   2   18.30    7.41
  11  -6   2   26.97   11.94
  11  -6   2   26.85    9.00
  11   6   2   40.68    8.91
  11   6   2   46.55   13.10
  11  -7  -2   -7.71    9.71
  11  -7  -2  -10.19    6.92
  11  -7  -2   -0.78    9.33
  11   7  -2   17.62   11.28
  10  -7  -2   37.61    8.96
  10  -7  -2   22.40   11.02
  10  -7  -2   47.00   12.23
  10   7  -2   30.48   12.05
   9  -7  -2  142.08   17.47
   9  -7  -2  189.12   14.56
   9  -7  -2  136.96   16.11
   9   7  -2  138.24   17.66
   9   7  -2  188.38    9.77
   8  -7  -2  135.93   14.69
   8  -7  -2  128.75   15.65
   8  -7  -2  146.14   13.55
   8   7  -2  149.85    8.61
   8   7  -2  136.64   12.93
   8   7  -2  130.53   15.77
   7  -7  -2   40.99    9.13
   7  -7  -2   63.48    8.95
   7  -7  -2   64.66   10.33
   7   7  -2   58.16   10.99
   7   7  -2   44.24    5.42
   7   7  -2   50.22    8.33
   6  -7  -2   14.06    6.58
   6  -7  -2    7.64    5.52
   6   7  -2    6.31    5.62
   6   7  -2   15.93    3.63
   6   7  -2    9.26    7.21
   5  -7  -2  123.28   11.47
   5  -7  -2  128.92    9.94
   5   7  -2  143.49   13.16
   5   7  -2  122.19    7.59
   4  -7  -2   -2.46    3.79
  -4  -7   2    0.84    2.44
   4  -7  -2   -0.79    4.70
   4   7  -2    6.13    4.92
   4   7  -2    1.25    2.15
   4   7  -2   -0.45    2.93
  -4   7   2   -3.01    3.80
  -3  -7   2  152.11    7.94
   3  -7  -2  143.49    9.49
   3  -7  -2  149.42   10.16
   3   7  -2  133.06    8.20
  -3   7   2  141.01    9.79
   3   7  -2  148.34   10.70
   2  -7  -2 1242.61   42.46
   2  -7  -2 1192.98   42.01
   2  -7  -2 1191.90   42.66
  -2  -7   2 1210.74   41.13
  -2   7   2 1235.60   42.71
   2   7  -2 1210.51   41.51
  -1  -7   2  124.45    8.27
   1  -7  -2  118.24    8.83
   1  -7  -2  124.44    9.11
  -1   7   2  138.18    9.43
   1   7  -2  114.01    8.13
   0  -7   2   15.44    3.54
   0  -7  -2    7.13    4.06
   0  -7   2   14.22    4.44
   0  -7  -2    3.51    4.43
   0   7   2    9.39    4.05
   0   7  -2    8.69    4.18
  -1  -7  -2   20.04    4.79
   1  -7   2   25.99    3.34
   1  -7   2   18.27    5.08
   1   7   2   29.44    5.82
  -2  -7  -2  469.48   18.91
   2  -7   2  441.10   17.33
   2  -7   2  435.81   19.22
   2   7   2  465.86   19.10
   2   7   2  430.66   18.33
  -3  -7  -2  203.55   11.32
   3  -7   2  213.39   12.36
   3  -7   2  212.95   10.97
   3   7   2  201.80   11.84
   3   7   2  179.30   11.25
  -4  -7  -2   98.09    8.48
   4  -7   2   75.78    8.88
   4  -7   2   76.72    8.35
   4   7   2   75.77    8.04
   4   7   2   73.19    8.70
   5  -7   2  124.90   11.30
   5  -7   2  109.65   10.54
  -5  -7  -2  140.12    9.54
   5   7   2  140.02   12.56
   5   7   2  131.79    9.85
   6  -7   2  130.98   12.75
   6  -7   2  129.61   12.38
   6   7   2  139.88   13.85
   6   7   2  124.56   10.83
   7  -7   2    4.96    6.16
   7  -7   2   11.55    6.33
   7   7   2   14.60    5.83
   7   7   2    8.21    7.49
   8  -7   2    5.70    6.50
   8  -7   2    9.25    8.30
   8   7   2   -0.38    5.36
   8   7   2    2.71    7.85
   9  -7   2    1.42    7.25
   9  -7   2    8.56    7.13
   9   7   2    0.98    5.76
   9   7   2   13.22    9.13
  10  -7   2   -7.81    5.90
  10  -7   2    2.60    9.23
  10   7   2   -0.98    6.05
  10   7   2   19.05    9.34
  11  -7   2    4.27    9.83
  11  -7   2    2.31    7.92
  11   7   2   12.44   10.08
  11   7   2    7.67    6.92
  11  -8  -2   -3.22    8.32
  11  -8  -2    4.03    7.47
  11  -8  -2   -2.29    9.43
  11   8  -2    6.88   10.99
  10  -8  -2   12.24   10.47
  10  -8  -2    7.70    7.59
  10  -8  -2    3.42    9.44
  10   8  -2   -2.29    9.58
   9  -8  -2   -3.45    8.76
   9  -8  -2    1.69    6.71
   9  -8  -2    4.12    8.90
   9   8  -2   -1.90    3.08
   9   8  -2    0.56    9.23
   9   8  -2   -7.62    5.04
   8  -8  -2   -1.96    7.88
   8  -8  -2    3.03    7.45
   8  -8  -2    9.25    7.08
   8   8  -2    6.80    3.65
   8   8  -2   12.64    6.52
   8   8  -2    4.95    8.73
   7  -8  -2   18.11    6.80
   7  -8  -2   25.45    8.63
   7  -8  -2   20.10    7.32
   7   8  -2   14.68    4.29
   7   8  -2   17.48    6.40
   7   8  -2   23.81    8.80
   6  -8  -2  514.15   23.63
   6  -8  -2  508.79   25.24
   6   8  -2  519.98   20.26
   6   8  -2  521.12   24.18
   6   8  -2  536.98   25.76
   5  -8  -2   11.21    6.41
   5  -8  -2   16.22    5.90
   5   8  -2   10.24    3.91
   5   8  -2   19.22    7.65
   4  -8  -2  148.17   12.07
   4  -8  -2  142.28   11.72
  -4  -8   2  112.37    7.22
  -4   8   2  122.87    9.72
   4   8  -2  109.61    7.83
   4   8  -2  125.76   11.92
   3  -8  -2   74.91    8.15
  -3  -8   2   72.21    6.54
   3  -8  -2   72.65    8.54
   3   8  -2   75.80    7.24
  -3   8   2   69.77    8.24
   2  -8  -2   -1.39    4.44
  -2  -8   2   -1.12    3.31
   2  -8  -2    6.59    4.97
   2  -8  -2    0.76    3.36
   2   8  -2   -2.86    3.32
  -2   8   2    0.15    4.29
  -1  -8   2  534.33   21.03
  -1  -8   2  531.13   19.59
   1  -8  -2  562.18   21.86
   1  -8  -2  541.49   22.21
   1   8  -2  486.59   21.05
  -1   8   2  532.18   22.14
   0  -8   2  144.98    8.10
   0  -8  -2  134.13    9.63
   0  -8   2  143.20    9.10
   0  -8  -2  133.75    9.57
   0   8  -2  163.21   10.06
   0   8   2  144.82    9.87
   1  -8   2   16.14    3.98
   1  -8   2   12.89    2.80
   1  -8   2   10.30    4.70
  -1  -8  -2   10.93    4.29
   1   8   2   15.96    5.16
  -2  -8  -2   17.77    4.96
   2  -8   2   14.94    3.71
   2  -8   2    6.03    4.76
   2   8   2    7.77    4.61
   3  -8   2   -4.28    4.22
   3  -8   2   -2.76    3.68
  -3  -8  -2    8.98    4.34
   3   8   2   -0.88    4.41
   3   8   2    1.48    3.77
  -4  -8  -2  125.08    9.53
   4  -8   2  134.88   12.28
   4  -8   2  121.61    9.50
   4   8   2  106.26   10.66
   4   8   2  128.78    9.59
  -5  -8  -2  106.35    9.63
   5  -8   2  116.53   12.16
   5  -8   2  126.93   11.61
   5   8   2  105.18   11.47
   5   8   2   99.89    9.78
   6  -8   2   10.15    6.03
   6  -8   2   26.01    7.68
   6   8   2   24.82    8.06
   6   8   2   15.26    5.62
   7  -8   2    4.05    6.02
   7  -8   2   -2.19    6.13
   7   8   2    2.95    5.60
   7   8   2    6.95    7.33
   8  -8   2   10.71    7.67
   8  -8   2   18.98    7.93
   8   8   2   16.85    9.44
   8   8   2   28.58    7.37
   9  -8   2   -8.44    7.41
   9  -8   2   -2.39    6.97
   9   8   2    5.01    6.62
   9   8   2   -3.72    8.49
  10  -8   2   -0.28    7.33
  10  -8   2    7.94    8.97
  10   8   2   12.13    7.22
  10   8   2    1.88    8.80
  11  -8   2   -4.32    9.17
  11  -8   2   12.57    9.03
  11   8   2   13.91    7.66
  11   8   2    7.55   10.16
  11  -9  -2   -5.97    9.86
  11  -9  -2    8.54   11.01
  11  -9  -2    8.93    8.94
  11   9  -2    5.71   11.02
  10  -9  -2   76.76   12.08
  10  -9  -2   32.45   11.23
  10  -9  -2   52.78   12.61
  10   9  -2   43.37   12.99
   9  -9  -2  111.02   15.23
   9  -9  -2  118.36   13.71
   9  -9  -2  130.87   16.17
   9   9  -2  102.28    8.03
   9   9  -2   96.00   13.96
   9   9  -2  116.05   12.99
   8  -9  -2   45.79    9.38
   8  -9  -2   35.93    9.70
   8  -9  -2   31.22   10.65
   8   9  -2   15.37    6.57
   8   9  -2   60.35   12.63
   8   9  -2   48.03    5.87
   7  -9  -2    6.32    6.23
   7  -9  -2   11.91    7.75
   7   9  -2   15.92    4.31
   7   9  -2   17.84    7.09
   7   9  -2   18.73    8.62
   6  -9  -2  311.76   17.35
   6  -9  -2  290.42   18.24
   6   9  -2  294.83   19.22
   6   9  -2  275.34   13.63
   5  -9  -2  321.16   18.38
   5  -9  -2  329.70   17.87
   5   9  -2  357.70   19.88
   5   9  -2  357.89   15.54
   4  -9  -2   38.65    7.13
   4  -9  -2   46.35    8.01
  -4  -9   2   47.41    6.01
   4   9  -2   51.23    6.34
   4   9  -2   37.77    7.59
  -4   9   2   58.68    8.24
  -3  -9   2   33.59    5.26
   3  -9  -2   43.80    6.78
   3  -9  -2   36.35    6.75
   3   9  -2   24.23    5.14
  -3   9   2   37.09    6.96
   2  -9  -2   92.51    9.72
   2  -9  -2   96.78    8.34
   2  -9  -2  100.20    9.80
  -2  -9   2   95.75    8.11
   2   9  -2   87.41    8.35
  -2   9   2   66.79    8.01
  -1  -9   2  538.64   21.98
   1  -9  -2  569.77   23.38
   1  -9  -2  507.23   22.26
  -1  -9   2  532.79   20.31
   1   9  -2  554.93   22.55
  -1   9   2  572.06   23.34
   0  -9  -2   35.67    6.56
   0  -9   2   27.45    4.62
   0  -9   2   31.73    6.00
   0  -9  -2   26.90    5.86
   0   9   2   30.76    5.90
   0   9  -2   26.29    5.94
   1  -9   2  168.29    7.56
   1  -9   2  164.64   11.01
   1  -9   2  175.18    9.70
  -1  -9  -2  150.70   10.43
   1   9   2  170.69   11.35
  -1   9  -2  146.55   10.47
   2  -9   2  639.37   27.28
  -2  -9  -2  707.44   27.06
   2  -9   2  683.68   24.72
   2   9   2  671.92   27.07
   3  -9   2  135.80   11.88
  -3  -9  -2  123.15    9.57
   3  -9   2  128.61    8.87
   3   9   2  122.91    9.83
   3   9   2  135.76   11.54
  -4  -9  -2   -0.11    3.88
   4  -9   2    2.79    4.50
   4  -9   2   12.34    5.85
   4   9   2    7.19    4.65
   4   9   2    5.07    5.53
   5  -9   2  113.51   11.06
   5  -9   2  134.39   12.28
   5   9   2  150.03   13.79
   5   9   2  124.52   11.11
   6  -9   2  188.37   14.53
   6  -9   2  207.99   14.85
   6   9   2  200.31   15.79
   6   9   2  222.25   13.87
   7  -9   2    0.54    6.67
   7  -9   2    6.72    6.52
   7   9   2    6.21    8.13
   7   9   2    3.88    5.84
   8  -9   2    5.06    8.10
   8  -9   2   19.68    8.41
   8   9   2   16.51    9.49
   8   9   2   29.30    7.80
   9  -9   2   32.22    9.75
   9  -9   2   39.86   10.52
   9   9   2   41.21    9.17
   9   9   2   49.12   11.98
  10  -9   2   30.86   10.62
  10  -9   2   28.84   11.64
  10   9   2   36.27   11.86
  10   9   2   60.50   10.05
  11  -9   2   -1.88    9.20
  11  -9   2    1.08    8.42
  11   9   2    9.85    7.23
  11   9   2   -9.45   10.13
  10 -10  -2   47.47   10.77
  10 -10  -2   17.92   11.34
  10 -10  -2   41.50   11.82
  10  10  -2   37.38   12.54
   9 -10  -2   17.32    9.87
   9 -10  -2    8.79    8.80
   9 -10  -2    5.14    7.99
   9  10  -2   15.20   10.43
   9  10  -2    3.32    6.64
   9  10  -2   -3.80    3.59
   8 -10  -2  125.63   13.88
   8 -10  -2  118.06   15.76
   8 -10  -2  139.84   15.26
   8  10  -2  120.48   16.11
   8  10  -2  129.93    9.22
   8  10  -2  126.09   13.58
   7 -10  -2  112.00   12.78
   7 -10  -2  106.29   13.45
   7  10  -2  115.09   13.13
   7  10  -2   85.70   13.30
   7  10  -2  117.03    8.75
   6 -10  -2    3.92    5.91
   6 -10  -2   -0.37    6.27
   6  10  -2    0.15    7.03
   6  10  -2    0.96    3.80
   5 -10  -2  168.48   14.14
   5 -10  -2  148.56   13.24
   5  10  -2  145.02   10.07
   5  10  -2  142.97   14.46
   4 -10  -2   56.37    8.20
   4 -10  -2   45.34    7.78
  -4  10   2   57.33    8.66
   4  10  -2   41.63    6.48
   3 -10  -2  130.88    9.85
  -3 -10   2  139.95    9.27
   3 -10  -2  130.86   12.17
   3  10  -2  119.64    9.39
  -3  10   2  104.83   10.42
   2 -10  -2  205.00   12.86
   2 -10  -2  190.69   11.39
   2 -10  -2  192.66   12.61
  -2 -10   2  210.41   11.62
  -2  10   2  217.83   13.33
   2  10  -2  190.78   11.67
  -1 -10   2   -0.02    3.91
   1 -10  -2   -1.76    5.08
   1 -10  -2    3.04    4.50
   1 -10  -2    2.68    3.49
  -1 -10   2    4.97    3.45
  -1  10   2    2.11    4.58
   1  10  -2    6.46    5.09
   0 -10   2  297.63   15.20
   0 -10  -2  298.22   15.23
   0 -10   2  291.43   13.47
   0 -10  -2  308.11   16.00
   0  10  -2  289.70   15.16
   0  10   2  296.06   16.07
  -1 -10  -2  396.02   18.54
   1 -10   2  408.53   17.36
   1 -10   2  410.57   15.20
  -1 -10  -2  418.24   19.02
   1 -10   2  397.27   18.75
  -1  10  -2  401.26   19.35
   1  10   2  457.90   20.05
   2 -10   2   24.78    4.48
   2 -10   2   32.70    7.10
  -2 -10  -2   38.03    6.94
   2  10   2   24.66    6.31
  -3 -10  -2  232.25   13.43
   3 -10   2  227.58   14.55
   3 -10   2  214.69   11.77
   3  10   2  226.71   13.57
   4 -10   2  130.38   11.15
  -4 -10  -2  139.61   10.77
   4 -10   2  164.80   13.98
   4  10   2  125.48   12.88
   4  10   2  133.62   11.66
   5 -10   2   18.36    6.35
   5 -10   2   30.34    7.54
   5  10   2   37.40    8.90
   5  10   2   33.56    7.19
   6 -10   2   -7.10    5.17
   6 -10   2   -4.59    5.75
   6  10   2   -0.07    7.22
   6  10   2    2.09    5.31
   7 -10   2   14.40    7.82
   7 -10   2   12.72    7.86
   7  10   2    1.53    5.97
   7  10   2   46.60   10.71
   8 -10   2   55.12   10.87
   8 -10   2   55.07   11.50
   8  10   2   36.89   11.05
   8  10   2   61.74    9.46
   9 -10   2   12.73    8.34
   9 -10   2   23.29   10.25
   9  10   2   11.17    7.80
   9  10   2   13.12   10.23
  10 -10   2    3.69    7.93
  10 -10   2    0.73    8.95
  10  10   2    4.15   10.44
  10  10   2    5.90    7.55
  10 -11  -2    5.13   10.02
  10 -11  -2    7.03   10.23
  10 -11  -2    6.72    8.40
  10  11  -2   12.76   10.53
   9 -11  -2   28.62    9.97
   9 -11  -2    1.25    9.00
   9 -11  -2   -2.84    8.12
   9  11  -2   -0.09    9.87
   9  11  -2    4.25    4.30
   9  11  -2    3.23    6.95
   8 -11  -2   -2.02    6.76
   8 -11  -2   -0.82    7.02
   8  11  -2   -5.51    6.27
   8  11  -2    7.61    9.56
   8  11  -2    7.02    4.33
   7 -11  -2    8.72    8.13
   7 -11  -2    5.94    7.09
   7  11  -2   -5.60    7.36
   7  11  -2    8.88    4.63
   6 -11  -2   12.66    6.88
   6 -11  -2    7.25    7.18
   6  11  -2    3.71    7.89
   6  11  -2    5.47    4.69
   5 -11  -2   35.83    8.06
   5 -11  -2   25.64    7.48
   5  11  -2   36.70    6.45
   4 -11  -2   47.80    8.65
   4 -11  -2   51.30    8.04
   4  11  -2   51.97    7.35
  -4  11   2   44.23    7.79
   3 -11  -2    1.63    4.47
  -3 -11   2    2.02    4.08
   3 -11  -2    3.32    5.00
   3  11  -2    0.33    4.21
  -3  11   2   -1.52    5.35
   2 -11  -2   -5.48    4.64
   2 -11  -2   -0.47    5.26
   2 -11  -2    4.70    4.17
  -2 -11   2    5.07    4.23
   2  11  -2    2.18    4.21
  -2  11   2    8.50    5.75
  -1 -11   2    7.20    3.83
   1 -11  -2   12.18    4.62
   1 -11  -2   11.35    5.46
   1 -11  -2   13.12    5.27
  -1 -11   2   16.36    5.50
   1  11  -2   13.11    5.52
  -1  11   2    8.78    5.10
   0 -11   2   56.22    6.75
   0 -11   2   31.58    6.27
   0 -11  -2   49.24    7.65
   0 -11  -2   45.56    7.64
   0  11   2   46.85    7.52
   0  11  -2   41.34    7.11
   1 -11   2  133.33   11.82
  -1 -11  -2  103.87   10.58
  -1 -11  -2  114.44   10.27
   1 -11   2  109.14    6.02
   1 -11   2  114.96    8.70
   1  11   2   94.68   10.08
  -1  11  -2  101.47   10.29
   2 -11   2   17.85    3.97
   2 -11   2   17.61    6.63
  -2 -11  -2   12.04    5.58
   2  11   2   17.63    5.50
   3 -11   2    2.33    4.98
   3 -11   2    5.11    4.24
  -3 -11  -2   15.81    5.89
   3  11   2    6.09    5.10
   4 -11   2   26.16    7.31
  -4 -11  -2   35.85    7.21
   4 -11   2   23.01    5.87
   4  11   2   25.64    7.54
   4  11   2   22.63    6.56
   5 -11   2   18.38    6.49
   5 -11   2   20.71    6.99
   5  11   2   23.35    6.75
   5  11   2   27.10    8.61
   6 -11   2   70.56   11.23
   6 -11   2   67.06   10.31
   6  11   2   70.78   11.92
   6  11   2   83.50   10.55
   7 -11   2    2.01    6.83
   7 -11   2   -1.77    6.77
   7  11   2    4.16    8.71
   7  11   2    5.72    6.38
   8 -11   2   -7.74    6.70
   8  11   2   -2.46    8.80
   8  11   2   -3.21    6.58
   9 -11   2   16.98    8.81
   9  11   2   -1.71    8.99
   9  11   2    6.63    7.27
  10 -11   2    6.81    9.81
  10 -11   2   -2.88    8.15
  10  11   2   11.76   10.82
  10  11   2   33.01    8.74
  10 -12  -2   15.31    9.89
  10 -12  -2   27.60   11.40
  10 -12  -2   22.11   10.87
  10  12  -2   16.42   12.44
   9 -12  -2    1.88    7.61
   9 -12  -2    7.28    9.24
   9 -12  -2    8.84    8.62
   9  12  -2    6.59    7.97
   9  12  -2   -1.93    9.66
   9  12  -2   -3.64    4.17
   8 -12  -2   94.35   13.27
   8 -12  -2   86.00   13.83
   8  12  -2   67.48   13.68
   8  12  -2   89.56    9.21
   8  12  -2  103.41   13.69
   7 -12  -2  223.74   16.87
   7 -12  -2  196.02   17.95
   7  12  -2  170.33   18.10
   7  12  -2  214.05   12.94
   6 -12  -2   31.06    8.88
   6 -12  -2   11.91    7.79
   6  12  -2   21.29    5.95
   5 -12  -2   18.87    7.22
   5 -12  -2   18.85    7.53
   5  12  -2   14.27    5.64
   4 -12  -2  103.37   10.75
   4 -12  -2  105.58   12.31
  -4  12   2   79.56   10.12
   4  12  -2   92.79    9.80
   3 -12  -2   50.72    7.77
   3 -12  -2   67.69   10.14
  -3  12   2   71.89   10.14
   3  12  -2   65.51    8.54
   2 -12  -2  166.44   12.68
  -2 -12   2  160.52   10.52
   2 -12  -2  167.20   10.77
  -2 -12   2  161.09   11.28
   2 -12  -2  177.81   14.76
  -2  12   2  184.82   15.44
   2  12  -2  153.07   11.72
   1 -12  -2   14.17    4.52
   1 -12  -2   18.30    6.71
  -1 -12   2   14.78    4.74
   1 -12  -2    0.11    4.96
  -1 -12   2    2.51    4.91
  -1  12   2    6.31    5.44
   1  12  -2   10.95    5.28
   0 -12   2  239.75   14.73
   0 -12   2  255.32   13.16
   0 -12  -2  247.13   14.46
   0 -12  -2  237.38   15.21
   0  12  -2  259.73   15.28
   0  12   2  239.22   15.13
   1 -12   2  642.24   25.78
  -1 -12  -2  683.07   28.30
   1 -12   2  696.89   28.50
  -1 -12  -2  684.52   27.40
   1  12   2  622.29   28.08
  -1  12  -2  653.63   28.35
   2 -12   2   57.69    5.85
   2 -12   2   41.92    7.88
  -2 -12  -2   44.65    7.97
   2  12   2   34.96    7.55
   3 -12   2  114.82   12.12
  -3 -12  -2  149.35   11.77
   3 -12   2  151.70    9.74
   3  12   2  117.03   11.67
   4 -12   2  448.13   20.49
   4 -12   2  444.29   23.22
   4  12   2  450.23   21.71
   5 -12   2    2.09    6.58
   5 -12   2   -3.20    5.37
   5  12   2   -5.30    6.16
   5  12   2    6.03    6.11
   6 -12   2   66.88   10.65
   6 -12   2   41.20    9.71
   6  12   2   32.63    8.67
   6  12   2   56.43   11.19
   7 -12   2  155.28   16.61
   7 -12   2  159.47   15.98
   7  12   2  166.68   14.92
   7  12   2  121.78   15.27
   8 -12   2  111.99   14.94
   8  12   2   85.11   14.63
   8  12   2  127.05   13.54
   9 -12   2    0.55    8.17
   9  12   2    8.68    7.67
   9  12   2   -8.15    9.10
  10 -12   2    0.07    9.37
  10 -12   2    2.13    9.14
  10  12   2    0.89   10.55
  10  12   2   -3.27    6.77
   9 -13  -2   28.59   11.11
   9 -13  -2   42.61   11.10
   9 -13  -2    5.20    8.76
   9  13  -2   31.60   10.18
   9  13  -2   17.25    5.88
   9  13  -2   14.84   10.60
   8 -13  -2   23.89   10.56
   8 -13  -2    4.99    8.35
   8  13  -2    9.24   10.11
   8  13  -2   11.54    5.64
   8  13  -2    1.93    7.54
   7 -13  -2    5.33    8.07
   7 -13  -2    3.03    7.40
   7  13  -2   12.08    5.51
   6 -13  -2   25.83    8.75
   6 -13  -2   29.48    9.11
   6  13  -2   23.37    6.61
   5 -13  -2  131.26   14.64
   5 -13  -2  156.25   14.28
   5  13  -2  131.44   11.95
   4 -13  -2   54.86   10.08
   4 -13  -2   78.82    9.99
  -4  13   2   67.14   10.39
   4  13  -2   50.83    8.35
   3 -13  -2    6.01    5.24
   3 -13  -2   13.98    7.12
  -3  13   2    2.14    6.57
   3  13  -2    7.98    5.37
   2 -13  -2   17.24    6.58
  -2 -13   2   34.67    6.73
  -2 -13   2   36.58    6.25
   2 -13  -2   33.09    7.63
   2 -13  -2   30.01    6.32
   2  13  -2   30.73    7.21
  -2  13   2   36.36    8.56
  -1 -13   2   91.48   10.44
   1 -13  -2   50.86    9.19
  -1 -13   2   65.72    7.56
   1 -13  -2   80.72    7.90
   1 -13  -2   57.72    8.85
  -1  13   2   59.87    9.28
   1  13  -2   68.22    9.77
   0 -13   2   74.78    8.25
   0 -13  -2   57.40    8.52
   0 -13   2   61.15    9.01
   0 -13  -2   60.95    9.78
   0  13  -2   73.83   10.04
   0  13   2   55.81    8.86
  -1 -13  -2   99.25   10.78
   1 -13   2  107.71   11.55
  -1 -13  -2   92.31   10.37
   1 -13   2  113.44   10.10
   1  13   2  106.40   11.99
  -1  13  -2   70.93   10.06
   2 -13   2  407.33   21.44
  -2 -13  -2  446.83   21.38
   2  13   2  412.77   21.46
   3 -13   2  500.17   24.53
   3 -13   2  476.31   20.23
  -3 -13  -2  496.71   23.11
   3  13   2  454.18   23.05
   4 -13   2   74.44    8.84
   4 -13   2   84.89   12.13
   4  13   2   72.79   10.09
   5 -13   2   15.06    6.32
   5 -13   2    2.02    6.24
   5  13   2   12.03    6.93
   6 -13   2  181.01   14.64
   6 -13   2  187.81   18.10
   6  13   2  202.58   19.09
   6  13   2  215.38   14.79
   7 -13   2   25.72    8.43
   7 -13   2   37.41   10.40
   7  13   2   16.79   10.15
   7  13   2   32.83    8.40
   8 -13   2   -6.42    7.60
   8  13   2    1.70    9.11
   8  13   2    3.16    7.30
   9 -13   2   48.87   12.35
   9  13   2   32.19   12.26
   9  13   2   45.83   10.23
   9 -14  -2  -16.47    7.05
   9 -14  -2   14.19    9.81
   9 -14  -2   17.89   10.28
   9  14  -2    9.96    8.35
   9  14  -2   15.40    5.76
   8 -14  -2    8.86    8.49
   8 -14  -2   14.39    9.60
   8  14  -2    4.19    5.05
   8  14  -2   -4.60    7.47
   7 -14  -2    7.59    8.15
   7 -14  -2   -0.82    8.19
   7  14  -2    3.54    5.62
   6 -14  -2    8.18    7.25
   6 -14  -2    8.35    7.93
   6  14  -2    8.37    6.20
   5 -14  -2   16.12    7.47
   5 -14  -2   16.64    7.94
   5  14  -2   17.53    6.52
   4 -14  -2    5.72    6.80
   4 -14  -2   -8.70    4.99
   4  14  -2    5.03    5.90
  -4  14   2    0.40    5.69
   3 -14  -2    1.83    5.34
   3 -14  -2    3.10    6.74
  -3  14   2    5.21    6.12
   3  14  -2   -6.52    4.88
   2 -14  -2   14.62    5.32
  -2 -14   2   11.22    6.72
   2 -14  -2   11.26    6.43
   2 -14  -2   11.59    7.35
  -2 -14   2   13.86    5.49
  -2  14   2   11.34    7.12
   2  14  -2   12.68    6.53
   1 -14  -2    9.75    4.86
   1 -14  -2   14.34    6.21
  -1 -14   2   15.67    5.60
  -1 -14   2   15.24    6.27
   1 -14  -2   15.71    6.36
  -1  14   2    4.63    5.91
   1  14  -2   16.39    6.51
   0 -14   2    3.84    4.81
   0 -14  -2    3.76    6.32
   0 -14  -2   10.10    5.90
   0 -14   2   -3.00    5.47
   0  14   2   10.83    6.77
   0  14  -2   10.74    6.70
   1 -14   2   28.90    8.05
  -1 -14  -2    9.94    5.98
  -1 -14  -2   28.05    8.00
   1 -14   2   35.03    6.81
   1  14   2   17.27    6.39
  -1  14  -2   35.54    8.86
   2 -14   2   34.56    8.27
  -2 -14  -2   44.80    8.55
  -2 -14  -2   47.38    9.24
   2  14   2   48.46    9.14
  -3 -14  -2   49.69    8.85
   3 -14   2   32.31    9.03
   3  14   2   44.09    8.64
   4 -14   2  133.08   14.18
   4  14   2  133.39   13.38
   5 -14   2   -0.73    6.49
   5 -14   2   -3.64    5.70
   5  14   2    5.28    6.27
   6 -14   2   23.87    9.28
   6 -14   2   20.22    8.00
   6  14   2   36.55    8.70
   7 -14   2    5.95    7.79
   7 -14   2    1.91    7.97
   7  14   2    3.13    8.10
   7  14   2   -7.71    6.17
   8 -14   2   -1.24    8.03
   8  14   2    5.43    7.56
   8  14   2   -4.68    8.58
   9 -14   2   -1.03    8.62
   9  14   2    6.29    7.64
   9  14   2   -8.94    9.81
   9 -15  -2   47.69   13.68
   9 -15  -2   38.64   11.67
   9  15  -2   43.58    8.13
   9  15  -2   32.43   10.56
   8 -15  -2    3.54    9.45
   8 -15  -2    7.98    8.60
   8  15  -2    2.23    8.70
   8  15  -2   12.82    6.39
   7 -15  -2    9.53    8.43
   7 -15  -2    6.02    8.56
   7  15  -2   -8.54    5.35
   6 -15  -2   21.16    8.13
   6 -15  -2    5.45    7.89
   6  15  -2    9.41    6.74
   5 -15  -2   70.39   11.04
   5 -15  -2   62.33   11.42
   5  15  -2   52.58    9.27
   4 -15  -2    8.68    8.16
   4 -15  -2   18.96    7.17
   4  15  -2   26.94    7.58
  -4  15   2   12.44    7.84
   3 -15  -2   27.39    6.99
  -3 -15   2   32.36    7.19
   3 -15  -2   23.31    8.93
   3  15  -2   25.86    7.51
  -3  15   2   31.71    9.36
  -2 -15   2   91.41    9.89
   2 -15  -2   82.32   11.18
   2 -15  -2   74.00   10.76
  -2  15   2   64.75   10.91
   2  15  -2   78.76   11.12
  -1 -15   2  117.90   12.78
   1 -15  -2  105.32   12.63
   1 -15  -2  124.43   12.54
  -1 -15   2  128.09   11.42
   1  15  -2  115.73   12.91
  -1  15   2  130.61   14.71
   0 -15   2   16.73    7.18
   0 -15  -2    8.46    6.23
   0 -15  -2   14.59    6.63
   0 -15   2    6.98    5.33
   0  15   2   17.04    7.18
   0  15  -2   25.10    7.73
  -1 -15  -2   31.54    7.69
  -1 -15  -2   35.23    8.62
   1 -15   2   40.05    7.78
   1 -15   2   35.42    8.81
   1  15   2   14.44    7.45
  -1  15  -2   41.26    9.11
  -2 -15  -2   62.54    9.88
   2 -15   2   92.67   12.58
  -2 -15  -2   69.68    9.94
   2  15   2   74.04   10.92
   3 -15   2   65.11   11.51
   3  15   2   40.72    8.77
   4 -15   2   21.60    7.98
   4  15   2   14.53    6.96
   5 -15   2  125.21   15.18
   5  15   2  127.41   14.39
   6 -15   2   90.67   13.65
   6  15   2  154.71   15.39
   7 -15   2   10.11    8.91
   7  15   2  -11.64    6.65
   8 -15   2   -1.93    8.57
   8  15   2    3.70    7.62
   9 -15   2    5.49    9.70
   9  15   2   44.80   10.76
   9  15   2   15.39   11.60
   8 -16  -2   27.73   11.08
   8 -16  -2   19.42   10.05
   8  16  -2    6.28    6.74
   8  16  -2    0.16    8.33
   7 -16  -2   44.79   11.57
   7 -16  -2   53.51   12.00
   7  16  -2   44.14    9.03
   6 -16  -2   15.19    9.17
   6 -16  -2   37.32    9.70
   6  16  -2   44.91    8.71
   5 -16  -2    0.59    7.83
   5  16  -2   -2.41    5.83
   4 -16  -2   79.98   12.80
   4  16  -2   77.03   11.25
  -4  16   2   64.35   11.66
  -3 -16   2  182.97   14.80
   3 -16  -2  168.54   17.02
  -3  16   2  151.55   16.17
   3  16  -2  143.79   14.57
  -2 -16   2   75.41    9.30
   2 -16  -2   53.18   10.76
   2 -16  -2   56.63   10.29
   2  16  -2   46.43    9.35
  -2  16   2   54.73   10.39
   1 -16  -2   24.72    8.19
  -1 -16   2   30.26    7.20
   1 -16  -2    7.46    7.58
  -1 -16   2   22.75    7.91
   1  16  -2   23.39    7.69
  -1  16   2   30.58    9.27
   0 -16  -2  264.37   17.98
   0 -16   2  232.27   15.02
   0 -16  -2  237.19   16.98
   0 -16   2  233.25   16.85
   0  16   2  297.44   19.36
   0  16  -2  268.02   18.19
  -1 -16  -2  126.15   14.33
  -1 -16  -2   98.95   11.76
   1 -16   2  119.28   11.90
   1 -16   2  109.53   13.23
  -1  16  -2  111.14   13.92
   1  16   2   69.36   11.49
  -2 -16  -2   -2.30    5.87
  -2 -16  -2    3.06    7.17
   2 -16   2   11.02    7.68
   2  16   2   13.96    7.69
  -3 -16  -2    4.52    6.45
   3 -16   2    4.87    6.62
   3  16   2   -8.98    5.74
   4 -16   2  136.54   15.10
   4  16   2  133.86   14.50
   5 -16   2   59.51   12.84
   5  16   2   61.93   10.79
   6 -16   2   -2.71    8.12
   6  16   2   14.57    7.94
   7 -16   2   74.50   14.54
   7  16   2   63.44   11.86
   8 -16   2   41.59   12.37
   8  16   2   68.39   12.10
   8 -17  -2    9.26    9.11
   8  17  -2   -5.69    5.86
   8  17  -2    2.09    9.76
   7 -17  -2    4.13    8.60
   7  17  -2    2.18    6.81
   6 -17  -2    3.71    8.64
   6  17  -2    8.74    7.12
   5 -17  -2    5.62    8.09
   5  17  -2   -1.52    6.15
   4 -17  -2    7.71    7.72
  -4 -17   2   -0.20    6.11
  -4  17   2   -3.86    6.70
   4  17  -2   -7.77    5.85
   3 -17  -2   -6.92    6.23
  -3 -17   2    7.02    6.48
   3  17  -2    2.05    6.89
  -3  17   2    3.98    6.57
   2 -17  -2   -5.47    7.30
   2 -17  -2    5.17    6.89
  -2 -17   2    5.19    5.76
  -2  17   2    2.53    7.57
   2  17  -2   10.26    7.54
   1 -17  -2   -5.35    7.05
  -1 -17   2   -6.00    5.08
   1 -17  -2   -1.39    6.23
  -1  17   2  -12.72    6.35
   1  17  -2   -2.82    5.32
   0 -17  -2   12.61    7.29
   0 -17   2   14.46    6.71
   0 -17  -2    6.22    6.89
   0 -17   2   16.02    8.11
   0  17   2   15.71    8.22
   0  17  -2   10.54    7.40
   1 -17   2    9.64    6.37
  -1 -17  -2   -4.40    6.13
   1 -17   2    3.90    7.48
  -1 -17  -2   -1.80    6.18
   1  17   2    0.20    6.34
  -1  17  -2   -5.36    6.43
  -2 -17  -2   32.95    8.92
   2 -17   2   34.98    9.78
   2  17   2   24.45    8.58
  -3 -17  -2    2.38    6.61
   3 -17   2    4.06    7.54
   3  17   2   -1.18    7.08
   4 -17   2   -3.29    7.58
   4  17   2    3.63    7.00
   5 -17   2   -6.93    7.65
   5  17   2   15.62    8.45
   6 -17   2   -3.37    7.90
   6  17   2    6.63    7.84
   7 -17   2    3.26    9.55
   7  17   2   10.99    8.12
   7 -18  -2   42.43   11.77
   7  18  -2   26.64    9.03
   6 -18  -2    8.82    9.58
   6  18  -2    5.68    7.96
   5 -18  -2   24.10    9.78
   5  18  -2   14.37    8.13
   4 -18  -2   68.52   12.40
   4  18  -2  103.23   13.48
  -4  18   2   83.93   14.62
   3 -18  -2  105.54   15.05
  -3 -18   2  137.25   13.89
   3  18  -2  119.20   14.32
  -3  18   2  121.85   15.87
   2 -18  -2   29.37    9.51
   2 -18  -2   22.81    8.78
  -2 -18   2   30.61    8.02
   2  18  -2   10.47    7.22
  -2  18   2   15.56    9.47
   1 -18  -2   57.29   10.87
  -1 -18   2   54.65    9.31
   1 -18  -2   51.03   11.40
  -1  18   2   51.06   11.00
   1  18  -2   41.48    9.96
   0 -18  -2   50.62   11.48
   0 -18   2   80.55   10.57
   0 -18  -2   47.40   10.14
   0  18  -2   57.71   11.71
   0  18   2   63.45   11.47
   1 -18   2    1.70    6.89
  -1 -18  -2    8.42    7.70
  -1 -18  -2    9.94    7.35
   1 -18   2    7.73    6.87
   1  18   2   -0.80    7.63
  -2 -18  -2   -2.18    6.86
   2 -18   2    5.53    8.59
   2  18   2    1.75    7.02
   3 -18   2  130.27   16.49
  -3 -18  -2  104.38   13.99
   3  18   2  111.68   14.06
  -4 -18  -2   12.60    8.87
   4 -18   2   13.76    9.16
   4  18   2   -2.85    7.01
   5 -18   2   -5.15    7.71
   5  18   2   -1.29    7.61
   6 -18   2    4.51    9.09
   6  18   2    4.28    7.32
   7 -18   2   20.72   11.07
   7  18   2   29.71   10.67
   6 -19  -2   17.20    9.73
   6  19  -2   23.58    9.07
   5 -19  -2   87.17   15.13
   5  19  -2   62.24   11.71
   4 -19  -2   -0.47    8.34
   4  19  -2   -5.95    6.97
  -4  19   2   15.09    8.52
   3 -19  -2   25.09   10.52
  -3  19   2   36.22   11.14
   3  19  -2   46.41   10.71
   2 -19  -2  151.15   17.99
   2 -19  -2  199.72   18.72
   2  19  -2  175.40   17.86
  -2  19   2  141.93   16.96
   1 -19  -2   19.84    9.67
   1 -19  -2   20.17    8.82
   1  19  -2   34.09    9.88
  -1  19   2   29.56    9.89
   0 -19  -2   -2.84    7.00
   0 -19  -2   -2.54    7.56
   0 -19   2   -5.40    5.87
   0  19  -2   -6.68    6.99
   0  19   2   -0.54    7.96
   1 -19   2    6.79    8.43
   1 -19   2   -1.13    6.41
  -1 -19  -2    2.00    6.93
   1  19   2   -3.34    6.91
   2 -19   2   83.32   13.90
  -2 -19  -2   81.51   12.69
   2  19   2   89.97   13.68
  -3 -19  -2   17.15    8.93
   3 -19   2   30.91   11.48
   3  19   2   34.71   10.25
   4 -19   2    3.80    8.21
  -4 -19  -2   -5.89    6.62
   4  19   2   -0.58    7.20
   5 -19   2   37.29   12.03
   5  19   2   15.22    9.29
   6 -19   2   45.67   12.77
   6  19   2   45.93   11.47
   5 -20  -2   12.64   10.33
   5  20  -2   -4.32    7.51
   4 -20  -2    4.78    8.57
   4  20  -2    2.33    8.29
   3 -20  -2   -3.71    8.67
   3  20  -2   -9.54    6.50
  -3  20   2   -9.38    7.62
   2 -20  -2   -3.74    7.42
   2 -20  -2   -1.97    8.51
   2  20  -2   -5.26    6.64
  -2  20   2   -3.32    8.22
   1 -20  -2   -1.76    8.44
   1 -20  -2   -9.87    7.16
  -1  20   2   -1.87    8.36
   1  20  -2    4.58    8.48
   0 -20  -2   11.19    8.54
   0 -20  -2    9.22    8.71
   0  20   2   -3.06    8.10
   0  20  -2   -5.32    7.42
  -1 -20  -2   -3.12    7.47
   1  20   2   -4.01    7.40
   2 -20   2    2.20    8.61
  -2 -20  -2    5.20    8.27
   2  20   2   -0.93    8.04
   3 -20   2   21.52   10.46
  -3 -20  -2  -10.31    7.34
   3  20   2   20.43    9.46
   4 -20   2    1.62    8.78
  -4 -20  -2    7.37    8.64
   4  20   2   -1.23    7.77
   5 -20   2    0.65    9.51
  -5 -20  -2   11.23    8.47
   5  20   2    5.16    8.50
   4 -21  -2    3.44    8.29
   4  21  -2    3.16    8.56
   3 -21  -2   22.27   10.43
   3  21  -2   33.24   10.41
  -3  21   2   20.57   10.55
   2 -21  -2   20.84    9.97
   2 -21  -2   36.88   11.85
   2  21  -2   44.67   11.30
  -2  21   2   37.05   11.56
   1 -21  -2   -0.87    8.30
   1 -21  -2  -15.82    6.83
   1  21  -2    5.12    8.32
  -1  21   2   -2.47    9.01
   0 -21  -2   -1.62    7.55
   0  21   2    3.82    9.03
  -1 -21  -2   27.58    9.94
   1  21   2   27.50   10.51
   2 -21   2   28.36   11.09
  -2 -21  -2   77.05   13.10
   2  21   2   74.93   14.41
   3 -21   2   39.53   12.11
  -3 -21  -2   43.73   11.65
   3  21   2   41.77   12.06
   4 -21   2    4.62    8.97
  -4 -21  -2    1.99    9.16
   4  21   2    2.36    8.66
   3 -22  -2   61.15   14.54
   3  22  -2   47.63   11.64
  -3  22   2   42.78   12.25
   2 -22  -2   25.62   11.43
   2  22  -2    5.41    9.19
  -2  22   2    7.37    9.92
   1 -22  -2    5.27    8.62
   1  22  -2    9.45    8.68
  -1  22   2   -3.07    8.79
   0 -22  -2  127.10   16.78
   0  22   2  143.14   19.12
  -1 -22  -2   57.22   12.22
   1  22   2   38.00   11.90
  -2 -22  -2    7.31    8.45
   2  22   2    8.99    8.79
   3 -22   2   22.80   11.69
  -3 -22  -2   35.22   11.45
   3  22   2   30.42   11.45
  12   0  -3   -7.48    9.43
  12   0  -3  -14.74    8.77
  11   0  -3   -6.93    9.29
  11   0  -3   -3.02    7.95
  10   0  -3    2.29    3.73
  10   0  -3    2.72    9.09
  10   0  -3    7.39    9.16
   9   0  -3   -3.11    7.59
   9   0  -3   -6.91    7.36
   9   0  -3   -5.09    3.07
   8   0  -3   -5.85    6.63
   8   0  -3   -3.20    2.69
   8   0  -3   -7.23    5.92
   7   0  -3   -2.14    2.39
   7   0  -3   -0.04    5.43
   7   0  -3    0.09    5.93
   7   0  -3   -7.63    3.11
   6   0  -3    2.51    3.69
   6   0  -3   -4.64    4.92
   6   0  -3   -1.47    1.86
   6   0  -3   -4.74    4.74
   6   0  -3    0.04    2.24
   5   0  -3    5.05    4.52
   5   0  -3   -0.89    4.41
   5   0  -3    1.16    3.53
   5   0  -3    1.95    1.76
   5   0  -3    0.85    2.01
   4   0  -3    4.40    3.65
   4   0  -3    1.02    1.89
   4   0  -3   -3.12    3.66
   4   0  -3    0.34    3.60
   4   0  -3    0.43    1.59
   3   0  -3   -0.60    1.71
   3   0  -3   -0.16    3.66
   3   0  -3   -1.31    1.58
   3   0  -3   -0.91    3.33
   3   0  -3    3.29    3.63
   2   0  -3   -1.86    1.76
   2   0  -3   -1.63    3.34
   2   0  -3    1.53    2.98
   2   0  -3    0.09    1.85
  -2   0   3   -2.43    1.43
   2   0  -3    2.20    3.50
   1   0  -3   -0.88    2.25
   1   0  -3   -1.08    2.80
  -1   0   3   -1.16    1.97
   1   0  -3   -2.32    2.14
   1   0  -3   -1.58    2.22
   1   0  -3   -0.61    2.01
   0   0  -3   -2.42    2.76
   0   0   3   -1.78    2.41
   0   0  -3   -3.88    2.68
   1   0   3   -2.56    3.13
   2   0   3   -2.13    3.42
   3   0   3    0.10    3.67
   3   0   3    0.72    3.64
   4   0   3   -2.44    3.30
   4   0   3    4.74    4.04
   5   0   3    4.67    4.88
   5   0   3   -1.21    3.52
   6   0   3    6.01    4.43
  -6   0  -3   -4.06    3.78
   6   0   3   -2.68    5.15
   7   0   3    5.54    4.89
   7   0   3   -1.31    5.68
   8   0   3    4.74    6.80
   8   0   3    1.36    5.17
   9   0   3    0.51    6.03
   9   0   3    1.17    7.68
  10   0   3    4.97    8.94
  10   0   3  -10.80    5.67
  11   0   3    9.93    7.92
  11   0   3   -5.69    8.23
  12  -1  -3   -0.90   10.12
  12  -1  -3   12.79   10.64
  12   1  -3   -3.24   10.47
  11  -1  -3   12.00   10.95
  11  -1  -3   22.40   10.94
  11   1  -3    6.64    9.62
  11   1  -3    4.18    9.84
  10  -1  -3   93.74   14.26
  10  -1  -3   94.10   14.29
  10  -1  -3  116.55    8.90
  10   1  -3  103.69   14.46
  10   1  -3   90.08   13.87
   9  -1  -3    4.24    8.27
   9  -1  -3    2.06    3.62
   9  -1  -3   -0.63    7.67
   9   1  -3    7.52    8.30
   9   1  -3    4.06    7.76
   9   1  -3    6.29    3.47
   8  -1  -3  103.70    7.45
   8  -1  -3   77.20   11.16
   8  -1  -3   92.92   12.31
   8   1  -3   86.61   12.00
   8   1  -3   98.59    9.43
   8   1  -3   80.23   11.83
   8   1  -3   92.95    6.26
   7  -1  -3  351.31   15.58
   7  -1  -3  324.07   13.64
   7  -1  -3  303.66   17.69
   7  -1  -3  333.11   19.42
   7   1  -3  340.02   15.83
   7   1  -3  326.02   12.69
   7   1  -3  316.88   18.85
   7   1  -3  297.51   17.84
   6  -1  -3   59.20    8.34
   6  -1  -3   66.06    9.00
   6  -1  -3   64.73    5.39
   6  -1  -3   57.65    5.27
   6  -1  -3   58.69    6.42
   6   1  -3   64.64    4.23
   6   1  -3   63.93    4.15
   6   1  -3   65.34    9.05
   6   1  -3   61.70    7.17
   6   1  -3   59.91    8.71
   5  -1  -3  111.61    6.21
   5  -1  -3  133.13    9.45
   5  -1  -3  106.83   10.27
   5  -1  -3  121.07    8.07
   5  -1  -3  113.85    6.48
   5   1  -3  109.64   10.00
   5   1  -3  125.55    5.28
   5   1  -3  130.70   10.80
   5   1  -3  136.98    8.75
   5   1  -3  113.89    5.28
   4  -1  -3  230.79   12.52
   4  -1  -3  215.76   11.07
   4  -1  -3  237.00    9.34
   4  -1  -3  240.54    9.60
   4  -1  -3  214.58   11.41
   4   1  -3  224.20   12.02
   4   1  -3  225.07   11.61
   4   1  -3  243.30   12.07
   3  -1  -3   58.46    4.08
   3  -1  -3   64.24    4.48
   3  -1  -3   64.03    6.00
   3  -1  -3   60.46    6.49
   3  -1  -3   75.81    6.30
   3   1  -3   64.41    6.41
  -3   1   3   57.11    3.90
   3   1  -3   64.65    6.62
   3   1  -3   46.48    5.77
   2  -1  -3  787.78   26.16
   2  -1  -3  794.15   28.37
   2  -1  -3  788.54   26.17
   2  -1  -3  753.29   27.30
   2  -1  -3  789.97   26.22
   2   1  -3  812.28   25.34
   2   1  -3  773.18   26.77
  -2   1   3  782.25   25.96
   2   1  -3  771.63   27.72
   2   1  -3  798.18   27.67
   2   1  -3  809.90   25.38
   1  -1  -3  173.50    7.80
  -1  -1   3  172.31    7.07
   1  -1  -3  169.90    6.47
   1  -1  -3  165.25    7.86
   1  -1  -3  167.33    7.70
   1   1  -3  182.45    7.26
  -1   1   3  185.52    7.69
   1   1  -3  177.14    8.75
   0  -1  -3    2.67    2.73
   0  -1   3    1.52    2.70
   0   1  -3    4.77    2.83
   0   1   3    9.03    2.91
   1  -1   3  237.84   10.29
  -1  -1  -3  212.31   10.26
  -1   1  -3  239.75    9.47
   1   1   3  238.76    9.01
   1   1   3  232.81   10.25
  -2  -1  -3   64.91    6.25
   2  -1   3   60.17    5.95
   2   1   3   60.21    6.02
   2   1   3   67.10    5.67
  -3  -1  -3   -4.25    3.28
   3  -1   3   -0.65    3.51
   3   1   3    1.08    3.64
   3   1   3   -0.46    3.69
   4  -1   3  595.78   23.86
   4  -1   3  632.44   24.23
  -4  -1  -3  599.09   23.48
   4   1   3  643.66   24.03
   4   1   3  619.14   23.99
  -5  -1  -3  648.32   25.71
   5  -1   3  682.77   26.38
   5  -1   3  693.33   27.28
   5   1   3  664.01   26.17
   5   1   3  693.28   27.02
   6  -1   3   10.05    6.05
  -6  -1  -3   -0.34    3.79
   6  -1   3    6.14    4.63
   6   1   3    3.05    4.42
   6   1   3   10.51    5.91
   7  -1   3   20.02    6.09
   7  -1   3   34.06    7.74
   7   1   3   29.51    6.84
   7   1   3   23.19    7.70
   8  -1   3   55.38   10.15
   8  -1   3   57.49    9.16
   8   1   3   76.64    9.67
   8   1   3   64.41   11.15
   9  -1   3   97.35   13.77
   9  -1   3   86.43   11.00
   9   1   3   98.74   11.26
   9   1   3   94.61   13.11
  10  -1   3    7.83    7.13
  10  -1   3   13.74    9.15
  10   1   3    6.59    8.74
  10   1   3    8.28    6.96
  11  -1   3   34.15   10.05
  11   1   3   64.72   11.18
  11   1   3   47.61   12.59
  12  -2  -3   41.54   13.39
  12  -2  -3   54.53   14.86
  12   2  -3   48.23   13.64
  11  -2  -3   23.35   11.52
  11  -2  -3    6.10    5.16
  11  -2  -3   -0.39   10.54
  11   2  -3    4.61    9.49
  11   2  -3    8.96   10.34
  10  -2  -3    4.03    4.18
  10  -2  -3   11.64    9.63
  10  -2  -3    1.27    8.91
  10   2  -3    9.73    8.42
  10   2  -3    7.10    8.35
   9  -2  -3   35.77    9.55
   9  -2  -3   30.93    5.82
   9  -2  -3   47.04   11.50
   9   2  -3   41.93   10.83
   9   2  -3   44.33    4.91
   9   2  -3   43.77   10.62
   8  -2  -3   29.55    8.47
   8  -2  -3   24.10    4.93
   8  -2  -3   13.77    8.77
   8   2  -3   25.95    5.72
   8   2  -3    6.08    7.17
   8   2  -3   18.78    3.38
   8   2  -3   11.38    7.73
   7  -2  -3    0.32    5.53
   7  -2  -3    5.58    3.37
   7  -2  -3   -4.88    5.61
   7   2  -3    2.36    4.01
   7   2  -3  -11.38    5.24
   7   2  -3   -1.47    2.03
   7   2  -3   -0.05    5.89
   6  -2  -3  248.95   11.50
   6  -2  -3  247.12   15.69
   6   2  -3  250.73    9.44
   6   2  -3  253.33   14.81
   6   2  -3  249.72   13.10
   6   2  -3  251.87   14.48
   5  -2  -3  789.28   29.22
   5  -2  -3  738.13   30.69
   5  -2  -3  749.90   26.88
   5  -2  -3  780.00   27.17
   5   2  -3  770.30   30.31
   5   2  -3  779.96   28.87
   5   2  -3  800.75   29.89
   4  -2  -3    9.66    3.21
   4  -2  -3    8.40    4.78
   4  -2  -3    5.88    2.51
   4  -2  -3    3.57    3.72
   4   2  -3    8.08    4.15
   4   2  -3    9.57    4.80
   4   2  -3    5.54    3.81
   3  -2  -3   36.12    3.91
   3  -2  -3   34.53    4.64
   3  -2  -3   34.93    5.73
   3  -2  -3   35.49    4.00
   3   2  -3   38.34    5.06
   3   2  -3   44.20    5.81
   3   2  -3   32.40    5.49
  -3   2   3   34.74    3.86
   2  -2  -3  217.03    9.31
   2  -2  -3  206.95    9.16
   2  -2  -3  199.92   10.39
   2  -2  -3  222.15    8.84
   2   2  -3  214.70   10.25
   2   2  -3  196.38    9.61
   2   2  -3  217.71   10.59
   2   2  -3  217.50    7.82
  -2   2   3  218.40    9.11
  -1  -2   3    7.51    2.31
   1  -2  -3   12.43    3.54
   1  -2  -3   10.06    3.33
  -1   2   3    7.35    2.90
   1   2  -3    9.58    2.82
   1   2  -3    9.83    3.80
   0  -2  -3   68.86    5.61
   0  -2   3   68.16    5.33
   0   2   3   48.73    4.93
   0   2  -3   67.31    5.38
   1  -2   3  112.61    7.60
  -1  -2  -3   70.54    6.38
  -1   2  -3   74.86    5.17
   1   2   3   77.74    4.94
   1   2   3   77.56    5.93
   2  -2   3  670.70   23.11
  -2  -2  -3  589.12   22.52
   2   2   3  616.11   22.55
   2   2   3  604.69   21.74
  -2   2  -3  605.49   20.45
  -3  -2  -3  121.13    8.22
   3  -2   3  137.48    8.90
   3   2   3  127.17    8.21
   3   2   3  110.90    8.19
   4  -2   3  226.98   11.88
  -4  -2  -3  201.28   10.87
   4   2   3  212.34   11.79
   4   2   3  200.56   11.07
  -5  -2  -3    0.69    3.76
   5  -2   3    1.38    4.14
   5  -2   3    6.17    4.47
   5   2   3    2.69    4.00
   5   2   3    1.59    4.70
   6  -2   3  174.50   11.89
   6  -2   3  200.44   13.70
  -6  -2  -3  198.43   11.57
   6   2   3  207.53   13.60
   6   2   3  193.28   11.75
   7  -2   3   99.04   11.85
   7  -2   3  117.18   11.01
   7   2   3  125.85   13.22
   7   2   3  105.52   10.25
   8  -2   3   -7.13    4.86
   8  -2   3    3.53    7.36
   8   2   3   -5.71    5.81
   8   2   3    0.29    4.89
   9  -2   3  111.65   12.39
   9  -2   3  119.18   15.41
   9   2   3  128.05   15.67
   9   2   3  127.94   12.33
  10  -2   3   57.33   12.51
  10  -2   3   80.85   11.28
  10   2   3   76.04   10.62
  10   2   3   58.82   12.65
  11  -2   3   21.27    8.83
  11  -2   3    2.78   10.28
  11   2   3   21.94    8.53
  11   2   3   14.00   11.15
  11  -3  -3   11.61    5.37
  11  -3  -3   14.15    9.88
  11  -3  -3   -5.11    9.79
  11   3  -3   17.19   10.16
  10  -3  -3    7.92    5.03
  10  -3  -3    4.92    8.29
  10  -3  -3    2.84    8.94
  10   3  -3   -2.09    9.12
  10   3  -3   16.75    9.43
   9  -3  -3  100.91   13.51
   9  -3  -3  106.31   14.97
   9  -3  -3  105.87    9.55
   9   3  -3  121.54    7.12
   9   3  -3  116.02   14.77
   9   3  -3  111.56   13.84
   8  -3  -3   46.75    6.61
   8  -3  -3   38.29   10.41
   8  -3  -3   57.62   10.41
   8   3  -3   46.74    7.05
   8   3  -3   52.26    4.46
   8   3  -3   55.05   10.26
   8   3  -3   32.29    8.74
   7  -3  -3   37.88    7.91
   7  -3  -3   20.07    7.45
   7  -3  -3   29.58    5.34
   7   3  -3   34.96    6.33
   7   3  -3   34.32    7.99
   7   3  -3   35.23    7.89
   7   3  -3   34.60    3.46
   6  -3  -3   14.17    6.13
   6  -3  -3   11.39    4.04
   6  -3  -3   12.58    5.36
   6   3  -3   18.75    6.11
   6   3  -3   12.19    4.60
   6   3  -3   11.27    6.42
   6   3  -3   15.45    2.19
   5  -3  -3   20.88    4.46
   5  -3  -3   38.19    4.68
   5  -3  -3   29.40    5.75
   5  -3  -3   36.22    7.21
   5   3  -3   36.84    6.36
   5   3  -3   34.06    5.93
   5   3  -3   42.02    7.48
   4  -3  -3   14.74    4.06
   4  -3  -3   24.11    5.11
   4  -3  -3   24.38    3.79
   4  -3  -3   22.37    5.42
   4   3  -3   18.19    4.73
   4   3  -3   18.40    4.99
   4   3  -3   21.25    5.23
   3  -3  -3   18.10    3.85
   3  -3  -3   17.32    3.86
   3  -3  -3   16.77    4.62
   3   3  -3   16.19    4.61
  -3   3   3   10.08    3.33
   3   3  -3   19.10    1.98
   3   3  -3   17.91    4.80
   3   3  -3   13.11    3.61
   2  -3  -3  766.24   28.00
   2  -3  -3  767.53   26.68
  -2  -3   3  753.70   24.79
   2   3  -3  768.67   26.58
   2   3  -3  754.93   27.29
   2   3  -3  767.21   25.07
   2   3  -3  754.36   26.96
  -2   3   3  770.87   26.42
   1  -3  -3    1.51    3.56
   1  -3  -3    4.29    3.52
  -1  -3   3   10.43    2.84
  -1   3   3    3.93    3.10
   1   3  -3    1.23    3.70
   1   3  -3    8.47    2.89
   0  -3  -3  675.11   23.35
   0  -3   3  632.52   22.59
   0   3  -3  626.42   22.59
   0   3   3  633.72   23.01
  -1  -3  -3  196.53   10.12
   1  -3   3  180.30    9.57
   1   3   3  200.80    8.48
   1   3   3  206.99    9.77
  -1   3  -3  200.61    8.92
  -2  -3  -3   -5.31    3.55
   2  -3   3    2.90    3.95
   2   3   3   -1.47    3.59
  -2   3  -3    2.76    2.26
   2   3   3    1.98    3.41
   3  -3   3  101.22    8.58
  -3  -3  -3   88.64    7.78
   3   3   3   69.55    6.96
   3   3   3   94.33    7.75
  -3   3  -3   78.79    4.01
   4  -3   3    2.91    4.18
  -4  -3  -3    6.95    4.07
   4   3   3    4.51    3.78
   4   3   3    4.65    4.08
  -5  -3  -3    9.92    4.41
   5  -3   3   12.77    5.00
   5   3   3   18.24    6.08
   5   3   3   10.79    4.60
  -6  -3  -3    6.36    4.41
   6  -3   3    7.06    4.83
   6  -3   3    0.46    5.25
   6   3   3    5.26    4.91
   6   3   3    7.82    4.59
   7  -3   3   -2.25    5.57
   7  -3   3    0.50    5.02
   7   3   3   -3.47    6.27
   7   3   3    1.48    4.84
   8  -3   3   37.75   10.26
   8  -3   3   43.91    8.54
   8   3   3   52.04    8.40
   8   3   3   44.77    9.95
   9  -3   3    1.77    6.04
   9  -3   3    1.25    6.99
   9   3   3   -0.14    7.72
   9   3   3   -6.21    5.44
  10  -3   3   -1.46    6.71
  10  -3   3   -0.27    7.88
  10   3   3    3.88    6.66
  10   3   3    4.20    9.61
  11  -3   3   -5.54    7.96
  11  -3   3    5.99    7.94
  11   3   3   15.66    7.91
  11   3   3   10.56   10.46
  11  -4  -3   -1.93    5.28
  11  -4  -3   11.14   10.48
  11  -4  -3   -1.51    9.37
  11   4  -3   -9.05    8.45
  10  -4  -3    7.25    9.90
  10  -4  -3   29.30    6.50
  10  -4  -3   10.94    9.38
  10   4  -3   17.35    9.63
  10   4  -3    7.33    7.67
   9  -4  -3   54.27    7.68
   9  -4  -3   49.32   11.20
   9  -4  -3   49.38   10.95
   9   4  -3   58.95   10.90
   9   4  -3   47.94   11.00
   8  -4  -3  169.61   15.79
   8  -4  -3  159.79   11.14
   8  -4  -3  147.41   16.00
   8   4  -3  168.38   15.43
   8   4  -3  187.65    7.89
   8   4  -3  208.68   12.70
   8   4  -3  146.89   15.82
   7  -4  -3   46.06    6.61
   7  -4  -3   35.83    7.88
   7  -4  -3   37.79    8.45
   7   4  -3   46.10    9.29
   7   4  -3   51.67    7.29
   7   4  -3   44.28    8.40
   7   4  -3   47.97    3.77
   6  -4  -3   91.28   11.01
   6  -4  -3  100.14   10.21
   6  -4  -3   96.22    8.58
   6   4  -3   90.79   10.24
   6   4  -3  110.52    9.94
   6   4  -3   96.15    4.79
   6   4  -3   88.02    9.86
   5  -4  -3  303.24   16.65
   5  -4  -3  291.66   13.70
   5  -4  -3  297.78   14.67
   5   4  -3  294.01   10.55
   5   4  -3  301.88   15.00
   5   4  -3  292.50   15.89
   5   4  -3  307.89   15.16
   4  -4  -3   56.79    6.02
   4  -4  -3   47.10    7.02
   4  -4  -3   51.73    6.01
  -4   4   3   53.55    5.64
   4   4  -3   49.60    3.15
   4   4  -3   62.28    8.09
   4   4  -3   61.68    6.49
   4   4  -3   61.73    7.10
   4   4  -3   50.80    3.41
   3  -4  -3  564.76   22.27
   3  -4  -3  516.86   20.29
  -3   4   3  531.79   20.26
   3   4  -3  541.41   21.62
   3   4  -3  528.00   20.31
   3   4  -3  545.86   18.34
   3   4  -3  538.03   21.51
   3   4  -3  553.65   18.42
  -2  -4   3 1910.25   59.96
   2  -4  -3 1817.11   62.93
   2  -4  -3 1832.93   61.71
   2  -4  -3 1882.82   61.01
   2   4  -3 1853.11   62.07
   2   4  -3 1972.43   60.31
  -2   4   3 1894.81   61.63
   2   4  -3 1872.83   61.21
  -1  -4   3 2680.37   83.13
   1  -4  -3 2527.24   84.11
   1  -4  -3 2717.80   82.58
   1   4  -3 2661.38   83.92
  -1   4   3 2450.33   83.84
   0  -4  -3  316.75   13.69
   0  -4  -3  320.75   13.80
   0  -4   3  337.70   13.33
   0   4  -3  335.74   13.48
   0   4   3  301.66   13.53
   1  -4   3   70.02    6.38
  -1  -4  -3   59.81    6.49
   1   4   3   67.89    5.24
  -1   4  -3   69.59    5.52
   1   4   3   70.56    6.46
   2  -4   3   61.13    6.89
  -2  -4  -3   60.27    6.18
   2   4   3   45.81    5.52
   2   4   3   59.02    5.88
  -2   4  -3   64.43    4.81
  -3  -4  -3   40.29    5.51
   3  -4   3   35.65    6.16
   3   4   3   35.70    5.23
  -3   4  -3   47.92    3.53
   3   4   3   38.35    5.92
  -4  -4  -3  182.43   10.60
   4  -4   3  200.41   11.62
   4   4   3  184.15   10.60
   4   4   3  184.01   11.35
  -5  -4  -3    9.94    4.13
   5  -4   3    6.30    4.85
   5   4   3    7.64    5.42
   5   4   3    9.66    4.32
   6  -4   3   73.00    8.95
  -6  -4  -3   64.29    7.49
   6   4   3   81.78    8.67
   6   4   3   84.23   10.49
   7  -4   3  181.25   13.48
   7  -4   3  203.24   15.01
   7   4   3  178.66   12.27
   7   4   3  204.69   17.09
   8  -4   3   -3.01    5.14
   8  -4   3   -4.18    6.89
   8   4   3   11.49    7.86
   8   4   3    6.37    5.61
   9  -4   3   89.87   13.99
   9  -4   3   86.78   11.69
   9   4   3  100.59   14.08
   9   4   3  127.95   12.29
  10  -4   3   37.25   11.63
  10  -4   3   29.54    8.87
  10   4   3   20.09    7.77
  10   4   3   17.95   10.02
  11  -4   3   -2.61    7.64
  11  -4   3    2.27    9.47
  11   4   3   -1.10    7.11
  11   4   3    9.21    9.73
  11  -5  -3   30.33    7.54
  11  -5  -3   19.26   11.62
  11  -5  -3   26.30   11.70
  11   5  -3   54.17   13.71
  10  -5  -3   53.96   12.48
  10  -5  -3   69.74    9.32
  10  -5  -3   74.92   13.37
  10   5  -3   77.88   15.02
   9  -5  -3    4.22    5.51
   9  -5  -3    8.14    8.47
   9  -5  -3   -0.71    8.58
   9   5  -3    7.58    7.56
   9   5  -3   -5.01    7.63
   8  -5  -3    1.61    7.23
   8  -5  -3   15.33    8.60
   8  -5  -3   18.67    6.05
   8   5  -3   21.80    8.58
   8   5  -3   16.61    5.73
   8   5  -3   21.16    2.94
   8   5  -3   25.83    7.61
   7  -5  -3   82.11   10.06
   7  -5  -3   54.60   10.55
   7  -5  -3   89.92    9.18
   7   5  -3   78.23    4.83
   7   5  -3   99.19   12.46
   7   5  -3   90.29   10.81
   7   5  -3   75.43    9.17
   6  -5  -3  144.49   13.83
   6  -5  -3  148.75   10.27
   6  -5  -3  147.68   11.09
   6   5  -3  139.91   12.88
   6   5  -3  145.47   11.08
   6   5  -3  134.85   10.70
   6   5  -3  139.46    6.43
   5  -5  -3   19.85    6.05
   5  -5  -3   26.19    5.83
   5  -5  -3   14.58    4.88
   5   5  -3   18.07    2.46
   5   5  -3   22.39    5.27
   5   5  -3   17.84    2.59
   5   5  -3   29.23    6.14
   5   5  -3   21.03    6.64
   4  -5  -3   20.84    5.91
   4  -5  -3   23.75    4.82
   4   5  -3   23.40    3.08
  -4   5   3   23.21    4.66
   4   5  -3   23.87    5.63
   4   5  -3   18.60    5.83
   4   5  -3   20.43    2.65
   4   5  -3   26.02    4.75
  -3  -5   3 1385.71   45.29
   3  -5  -3 1405.26   49.46
   3  -5  -3 1389.34   47.93
   3   5  -3 1454.76   45.98
   3   5  -3 1443.67   45.89
   3   5  -3 1404.84   48.61
  -3   5   3 1421.62   47.74
   3   5  -3 1363.54   48.26
   3   5  -3 1404.03   47.25
   2  -5  -3  646.58   24.67
   2  -5  -3  663.33   24.41
   2  -5  -3  659.56   24.42
  -2  -5   3  647.85   22.40
   2   5  -3  645.80   22.69
  -2   5   3  639.72   24.07
   2   5  -3  639.54   24.62
   2   5  -3  653.55   22.40
   2   5  -3  645.22   22.75
  -1  -5   3  349.05   13.59
   1  -5  -3  340.09   14.51
   1  -5  -3  323.89   14.74
   1   5  -3  328.66   11.74
  -1   5   3  352.57   14.74
   0  -5  -3 1155.21   37.28
   0  -5   3 1096.98   34.47
   0  -5   3 1075.92   37.16
   0  -5  -3 1045.24   38.03
   0   5   3 1079.09   37.87
  -1  -5  -3  512.27   20.04
   1  -5   3  465.03   19.32
   1   5   3  532.95   20.15
   1   5   3  494.31   18.19
  -2  -5  -3  147.47    9.19
   2  -5   3  176.40   10.18
   2   5   3  155.12    8.99
   2   5   3  146.81    9.44
  -2   5  -3  160.02    7.78
  -3  -5  -3   92.14    7.99
   3  -5   3  119.52    9.90
  -3   5  -3   99.40    5.47
   3   5   3  104.39    8.16
   3   5   3   95.07    8.30
  -4  -5  -3  750.10   28.61
   4  -5   3  777.69   29.87
   4   5   3  785.89   29.35
  -4   5  -3  774.94   24.74
   4   5   3  751.83   28.98
   5  -5   3  121.80   11.18
  -5  -5  -3  134.99    9.26
   5   5   3  106.30   10.22
   5   5   3  118.97    9.27
   6  -5   3    5.11    4.93
   6   5   3   -4.00    5.23
   6   5   3    3.31    4.34
   7  -5   3  207.13   14.49
   7  -5   3  238.07   16.45
   7   5   3  220.10   13.83
   7   5   3  246.13   16.29
   8  -5   3  135.53   15.03
   8  -5   3  152.98   14.16
   8   5   3  137.70   14.76
   8   5   3  155.52   13.11
   9  -5   3   22.02   10.02
   9  -5   3   20.79    7.90
   9   5   3   18.69    9.09
   9   5   3   30.77    7.81
  10  -5   3   -0.68    7.34
  10  -5   3    1.65    6.68
  10   5   3   -0.62    9.16
  10   5   3    8.86    7.38
  11  -5   3   27.24   11.51
  11  -5   3   33.80    9.63
  11   5   3   24.49   11.34
  11   5   3   29.72    9.00
  11  -6  -3    0.01   10.27
  11  -6  -3    4.77    6.47
  11  -6  -3   11.40   10.85
  11   6  -3    3.22   10.27
  10  -6  -3    0.96    6.10
  10  -6  -3   19.83   11.01
  10  -6  -3   19.87    9.65
  10   6  -3   -1.57    9.44
   9  -6  -3   51.73    8.67
   9  -6  -3   51.23   11.13
   9  -6  -3   75.31   13.85
   9   6  -3   36.56    8.10
   9   6  -3   48.01   11.94
   8  -6  -3   42.45   10.84
   8  -6  -3   54.79    8.79
   8  -6  -3   62.54   10.32
   8   6  -3   34.13    8.54
   8   6  -3   38.67   10.70
   8   6  -3   63.44    8.88
   8   6  -3   48.43    4.28
   7  -6  -3  180.82   12.50
   7  -6  -3  180.76   16.57
   7  -6  -3  174.47   14.77
   7   6  -3  154.34   13.79
   7   6  -3  170.30   12.79
   7   6  -3  175.04   16.10
   7   6  -3  165.08    7.78
   6  -6  -3   -2.75    5.98
   6  -6  -3    6.16    4.87
   6  -6  -3   -6.87    4.35
   6   6  -3    0.72    2.18
   6   6  -3   -0.92    4.96
   6   6  -3    1.05    6.43
   6   6  -3    1.06    4.27
   5  -6  -3    4.64    5.00
   5  -6  -3   -1.32    4.10
   5   6  -3    3.39    5.65
   5   6  -3   -8.68    3.92
   5   6  -3   -0.39    3.32
   5   6  -3    0.94    1.72
   5   6  -3   -0.61    2.19
   4  -6  -3   12.29    4.73
   4  -6  -3   12.05    5.11
   4   6  -3   14.14    3.13
   4   6  -3    3.74    5.66
   4   6  -3   10.76    2.44
   4   6  -3    6.76    5.03
  -4   6   3   10.31    4.15
   4   6  -3   16.93    4.02
   3  -6  -3  330.63   16.05
  -3  -6   3  347.17   12.82
   3  -6  -3  325.47   15.30
   3   6  -3  331.60   16.20
   3   6  -3  335.63   13.46
   3   6  -3  331.08   13.26
   3   6  -3  324.71   13.42
  -3   6   3  344.41   15.25
  -2  -6   3  209.98    9.59
   2  -6  -3  206.40   11.22
   2  -6  -3  209.11   11.82
   2  -6  -3  212.82   11.37
   2   6  -3  199.64    9.86
   2   6  -3  216.71    8.55
  -2   6   3  218.20   11.41
   1  -6  -3   16.76    5.17
  -1  -6   3   16.37    3.83
   1  -6  -3   21.00    5.37
  -1   6   3   17.65    4.21
   1   6  -3   22.56    4.53
   0  -6   3    0.63    3.31
   0  -6   3    2.06    2.44
   0  -6  -3    4.73    4.24
   0  -6  -3    5.33    4.09
   0   6   3    3.33    4.27
  -1  -6  -3  191.89   11.11
   1  -6   3  174.53    9.94
   1   6   3  183.81   10.78
   2  -6   3   31.73    5.50
  -2  -6  -3   37.09    5.54
   2   6   3   31.15    4.99
   2   6   3   36.32    5.95
  -3  -6  -3  262.18   13.22
   3  -6   3  263.23   13.84
   3   6   3  249.17   13.09
   3   6   3  259.90   13.24
   4  -6   3    6.33    4.80
  -4  -6  -3    8.47    4.52
   4   6   3   11.43    4.54
  -4   6  -3   10.71    2.37
   4   6   3    2.09    4.63
   5  -6   3  130.45   11.77
  -5  -6  -3  123.95    9.26
   5   6   3  109.37    9.93
   5   6   3  137.38   12.26
   6  -6   3   81.01    9.90
   6   6   3   81.62    8.97
   6   6   3   73.91   10.78
   7  -6   3   20.17    7.48
   7   6   3   12.57    5.73
   7   6   3   39.15    9.32
   8  -6   3   -0.86    6.62
   8  -6   3   -1.38    6.17
   8   6   3   -9.41    4.88
   8   6   3   -1.27    6.55
   9  -6   3   57.73   12.02
   9  -6   3   53.29   10.38
   9   6   3   61.42   12.12
   9   6   3   67.62   10.10
  10  -6   3    8.39    9.84
  10  -6   3    5.45    7.21
  10   6   3   -6.58    8.78
  10   6   3   -9.05    6.61
  11  -6   3   -5.56    7.14
  11  -6   3  -17.37    8.39
  11   6   3   -7.10    6.77
  11   6   3    0.02    9.53
  11  -7  -3   33.81   12.96
  11  -7  -3   52.18    9.69
  11  -7  -3   43.13   12.71
  11   7  -3   41.43   12.58
  10  -7  -3   27.29   10.73
  10  -7  -3   50.30    9.64
  10  -7  -3   65.62   14.21
  10   7  -3   41.81   11.87
   9  -7  -3   16.15    8.48
   9  -7  -3  -11.90    7.50
   9  -7  -3   15.33    6.95
   9   7  -3    5.00    5.61
   9   7  -3   -2.23    8.65
   8  -7  -3   47.84    9.79
   8  -7  -3   34.38    8.13
   8  -7  -3   37.21   10.42
   8   7  -3   39.75    8.34
   8   7  -3   29.81    3.90
   8   7  -3   31.85   10.76
   7  -7  -3  184.90   13.20
   7  -7  -3  175.27   13.38
   7  -7  -3  176.34   16.24
   7   7  -3  187.32   13.51
   7   7  -3  177.97   12.85
   7   7  -3  191.71    8.81
   7   7  -3  177.67   16.64
   6  -7  -3   79.38    9.27
   6  -7  -3   85.80    9.56
   6  -7  -3   85.76   10.97
   6   7  -3   89.79    9.20
   6   7  -3   68.62    9.36
   6   7  -3   76.69    5.64
   6   7  -3   86.20   11.27
   5  -7  -3    9.52    6.23
   5  -7  -3    8.43    4.99
   5   7  -3    7.90    5.31
   5   7  -3   10.64    7.02
   5   7  -3    7.87    2.46
   5   7  -3   15.04    3.37
   5   7  -3   11.35    4.17
   4  -7  -3  147.96   10.29
   4  -7  -3  158.63   11.42
   4   7  -3  153.62    7.74
   4   7  -3  146.68    8.55
  -4   7   3  146.77   10.13
   4   7  -3  147.96   11.63
   4   7  -3  138.91    8.05
   3  -7  -3  979.32   35.94
  -3  -7   3  944.82   32.65
   3  -7  -3  970.05   35.40
  -3   7   3  927.28   34.98
   3   7  -3  984.48   33.40
   3   7  -3  965.09   32.88
   3   7  -3  952.30   33.24
   2  -7  -3   45.68    6.14
  -2  -7   3   41.51    4.84
   2  -7  -3   45.49    6.71
   2  -7  -3   38.44    6.35
   2   7  -3   43.74    3.11
  -2   7   3   34.36    5.51
   2   7  -3   32.42    5.06
  -1  -7   3  637.75   21.69
   1  -7  -3  684.97   25.42
   1  -7  -3  652.02   24.66
  -1  -7   3  597.18   23.41
  -1   7   3  625.49   24.92
   1   7  -3  612.13   23.85
   0  -7  -3  278.76   13.85
   0  -7   3  291.36   11.39
   0  -7  -3  285.20   14.28
   0  -7   3  286.92   13.38
   0   7   3  271.18   13.90
  -1  -7  -3   55.98    7.27
   1  -7   3   52.08    6.33
   1   7   3   83.20    8.58
  -2  -7  -3   24.53    5.57
   2  -7   3   25.90    5.24
   2   7   3   23.82    5.06
   2   7   3   36.45    6.39
  -3  -7  -3  214.47   12.20
   3  -7   3  234.07   13.33
   3   7   3  232.72   12.65
   3   7   3  207.08   12.29
   4  -7   3  339.91   17.39
  -4  -7  -3  357.84   16.66
   4   7   3  373.82   17.72
   4   7   3  360.71   17.17
  -5  -7  -3  154.40   10.63
   5  -7   3  131.82   12.13
   5   7   3  152.73   13.02
   5   7   3  135.62   10.56
   6  -7   3   -0.12    5.53
   6   7   3    9.66    5.08
   6   7   3    6.43    6.61
   7  -7   3   68.60   10.01
   7   7   3   61.53    9.00
   7   7   3   62.45   11.01
   8  -7   3   20.58    7.93
   8  -7   3   24.30    9.33
   8   7   3   25.04    7.45
   8   7   3   16.35    7.96
   9  -7   3   -0.76    7.21
   9  -7   3    5.73    7.20
   9   7   3    1.42    8.46
   9   7   3    4.11    6.74
  10  -7   3  -15.69    8.11
  10  -7   3    0.14    7.61
  10   7   3   -1.64    8.55
  10   7   3    0.25    6.93
  11  -7   3   11.71    8.47
  11  -7   3    5.18    8.80
  11   7   3    3.97    7.65
  11   7   3   16.91   10.78
  11  -8  -3  -11.94    7.09
  11  -8  -3   -1.50    9.86
  11  -8  -3  -14.12    9.09
  11   8  -3  -17.77    9.14
  10  -8  -3   20.38   10.02
  10  -8  -3   22.00   10.96
  10  -8  -3   17.36    8.27
  10   8  -3   18.36   11.44
   9  -8  -3  166.75   19.03
   9  -8  -3  172.18   17.07
   9  -8  -3  180.80   15.89
   9   8  -3  147.44   17.16
   9   8  -3  186.40   16.28
   8  -8  -3  141.68   13.47
   8  -8  -3  104.10   14.67
   8  -8  -3  132.56   14.10
   8   8  -3   99.75   14.05
   8   8  -3   97.22    6.76
   8   8  -3  105.96   11.96
   7  -8  -3   19.57    8.80
   7  -8  -3   24.74    7.05
   7  -8  -3   12.50    6.99
   7   8  -3   16.21    8.66
   7   8  -3   22.46    7.40
   7   8  -3   15.60    3.63
   6  -8  -3   63.67    9.17
   6  -8  -3   66.57   10.51
   6   8  -3   49.01    9.00
   6   8  -3   63.40    5.83
   6   8  -3   61.75   10.86
   5  -8  -3  111.93   11.76
   5  -8  -3   94.68    9.99
   5   8  -3  100.73   12.19
   5   8  -3   91.58    6.83
   5   8  -3   92.72   10.39
  -4  -8   3   99.46    6.48
   4  -8  -3  114.54   10.08
   4  -8  -3  111.57   10.60
  -4   8   3  125.06   10.79
   4   8  -3  124.65   12.23
   4   8  -3  109.05    7.67
  -3  -8   3   77.29    6.13
   3  -8  -3   80.77    8.87
   3  -8  -3   87.57    9.00
   3   8  -3   87.81    7.49
  -3   8   3   87.56    9.36
   2  -8  -3  214.24   11.95
   2  -8  -3  202.85   12.43
  -2  -8   3  178.21    9.86
   2  -8  -3  188.25   11.07
  -2   8   3  204.16   11.86
   2   8  -3  179.18   10.50
   1  -8  -3  703.53   27.13
   1  -8  -3  688.21   26.48
  -1  -8   3  689.15   23.62
  -1  -8   3  676.11   25.61
  -1   8   3  671.57   26.88
   1   8  -3  651.84   25.75
   0  -8   3  102.89    6.74
   0  -8  -3  115.35   10.19
   0  -8   3  118.82    8.63
   0  -8  -3  124.55    9.01
   0   8   3  136.84    9.95
   1  -8   3   27.89    5.86
  -1  -8  -3   36.68    6.38
   1   8   3   22.87    5.44
  -2  -8  -3  871.00   33.18
   2  -8   3  908.20   33.62
   2   8   3  869.23   33.30
  -3  -8  -3   98.11    9.34
   3  -8   3   95.17    9.72
   3   8   3  122.21   10.55
   3   8   3   90.91    8.91
   4  -8   3    1.90    5.07
  -4  -8  -3   -2.32    4.13
   4   8   3    8.75    5.31
   4   8   3    3.99    4.41
   5  -8   3  203.95   14.36
  -5  -8  -3  221.26   13.30
   5   8   3  228.61   13.63
   5   8   3  251.39   15.36
   6  -8   3  162.23   14.33
   6   8   3  142.91   12.57
   6   8   3  178.63   15.41
   7  -8   3   22.64    7.95
   7   8   3   28.80    7.60
   7   8   3   39.81    9.71
   8  -8   3    1.59    7.15
   8   8   3    3.09    8.11
   8   8   3   14.63    6.83
   9  -8   3   34.09   10.00
   9  -8   3   13.07    8.67
   9   8   3   11.13    7.32
   9   8   3   20.94    9.89
  10  -8   3   46.08   11.49
  10  -8   3   34.06    9.85
  10   8   3   19.59   10.67
  10   8   3   38.06    9.51
  11  -8   3   -4.73    9.18
  11  -8   3    1.04    8.24
  11   8   3   16.95   11.45
  11   8   3    3.80    7.89
  11  -9  -3  -18.31    6.98
  11  -9  -3    1.67   10.34
  11  -9  -3    3.24    8.14
  11   9  -3    5.81   11.10
  10  -9  -3   10.88    7.98
  10  -9  -3    0.29    8.79
  10  -9  -3   -6.48    8.59
  10   9  -3   -3.97    9.17
   9  -9  -3    2.44    7.82
   9  -9  -3   -0.14    6.99
   9  -9  -3   -8.24    8.61
   9   9  -3    4.14    6.89
   9   9  -3   16.28   10.17
   8  -9  -3    4.92    7.05
   8  -9  -3    0.63    6.78
   8  -9  -3   17.79    8.79
   8   9  -3   23.79    7.88
   8   9  -3    6.79    3.46
   8   9  -3    1.72    8.87
   7  -9  -3   11.73    6.68
   7  -9  -3   21.07    7.53
   7  -9  -3   31.08    9.77
   7   9  -3   23.03    8.98
   7   9  -3   32.05    8.68
   7   9  -3   23.11    4.46
   6  -9  -3    0.49    5.52
   6  -9  -3   -1.47    6.21
   6   9  -3    3.41    5.86
   6   9  -3   -4.60    6.92
   6   9  -3    2.89    3.33
   5  -9  -3  272.39   16.60
   5  -9  -3  244.02   15.39
   5   9  -3  271.45   12.78
   5   9  -3  274.42   17.19
   4  -9  -3   -1.54    4.41
   4  -9  -3    6.55    5.39
   4   9  -3   -1.04    3.49
  -4   9   3    2.16    4.73
   3  -9  -3  200.57   13.05
   3  -9  -3  201.18   12.34
  -3  -9   3  201.58   10.38
   3   9  -3  208.90   11.34
  -3   9   3  206.71   12.77
  -2  -9   3   10.12    3.92
   2  -9  -3   14.38    4.84
   2  -9  -3   14.99    5.53
   2  -9  -3   11.29    5.62
   2   9  -3    8.81    4.33
  -2   9   3   12.53    5.33
   1  -9  -3  117.18   10.21
   1  -9  -3  135.81   10.66
  -1  -9   3  117.27    7.22
  -1  -9   3  118.98    8.64
  -1   9   3  122.90    9.75
   1   9  -3  117.18    8.97
   0  -9   3    7.85    3.33
   0  -9   3    8.76    4.63
   0  -9  -3    5.06    4.51
   0  -9  -3    0.82    4.36
   0   9   3    6.18    4.77
   1  -9   3  187.58   12.01
  -1  -9  -3  203.79   12.54
   1   9   3  197.34   12.37
   2  -9   3    4.09    4.32
  -2  -9  -3    6.67    4.82
   2   9   3    2.83    4.23
   3  -9   3  121.94   11.14
  -3  -9  -3  120.79   10.42
   3   9   3  126.57   11.19
   3   9   3  143.64   11.79
   4  -9   3   46.89    8.23
  -4  -9  -3   35.72    6.82
   4   9   3   21.85    6.42
   4   9   3   27.09    6.47
   5  -9   3    3.48    5.69
   5   9   3    3.23    6.21
   5   9   3    6.94    5.17
   6  -9   3   11.34    6.83
   6   9   3    7.26    7.13
   6   9   3   10.91    5.92
   7  -9   3   11.29    7.28
   7   9   3   13.48    8.13
   7   9   3    9.62    6.21
   8  -9   3    9.92    7.51
   8   9   3   25.19    8.01
   8   9   3   25.96    9.16
   9  -9   3   -4.09    6.74
   9  -9   3    1.69    8.24
   9   9   3   -7.08    8.81
   9   9   3    4.78    7.34
  10  -9   3   -5.23    8.81
  10  -9   3    2.13    7.95
  10   9   3    3.71    7.76
  10   9   3   -0.17    9.11
  10 -10  -3    4.77    9.22
  10 -10  -3   -0.78    8.23
  10 -10  -3   11.28   10.26
  10  10  -3   12.35   10.28
   9 -10  -3   19.81    9.11
   9 -10  -3   18.95    9.29
   9 -10  -3   35.02   11.48
   9  10  -3   22.65    8.30
   9  10  -3   15.45   10.70
   8 -10  -3    6.87    7.62
   8 -10  -3   -3.19    6.62
   8 -10  -3    0.59    8.28
   8  10  -3    3.02    3.35
   8  10  -3   -7.58    6.26
   8  10  -3    6.21    9.53
   7 -10  -3    5.79    7.08
   7 -10  -3    1.82    7.94
   7  10  -3   20.15    4.66
   7  10  -3   25.69    8.10
   7  10  -3   28.49    9.86
   6 -10  -3   68.11    9.86
   6 -10  -3   48.91    9.74
   6  10  -3   71.56   10.65
   6  10  -3   60.27   11.47
   6  10  -3   63.24    6.87
   5 -10  -3  304.25   17.43
   5 -10  -3  296.53   17.74
  -5  10   3  301.31   16.84
   5  10  -3  285.78   14.11
   4 -10  -3    8.29    5.51
   4 -10  -3    9.02    5.81
   4  10  -3   10.44    4.36
  -4  10   3    6.89    5.30
  -3 -10   3    2.43    3.59
   3 -10  -3    1.69    4.82
   3 -10  -3   -1.82    4.23
   3 -10  -3    1.92    4.65
   3  10  -3    2.25    4.02
  -3  10   3    0.79    4.88
   2 -10  -3   -3.40    5.21
   2 -10  -3    1.57    4.96
   2 -10  -3    3.55    4.21
  -2 -10   3    5.12    3.83
   2  10  -3   -7.25    3.75
  -2  10   3    3.23    4.99
  -1 -10   3    6.93    3.37
   1 -10  -3    4.44    5.03
   1 -10  -3    2.31    5.17
  -1 -10   3    9.93    4.68
   1  10  -3    0.81    4.02
  -1  10   3    4.78    4.81
   0 -10   3   87.36    9.19
   0 -10  -3   92.79    9.61
   0 -10  -3   90.37    9.73
   0 -10   3   89.93    7.43
   0  10  -3   80.95    9.03
   0  10   3   64.84    8.58
  -1 -10  -3  100.80   10.02
   1 -10   3  109.68   10.27
  -1 -10  -3   95.85    9.76
   1  10   3  106.68   10.68
   2 -10   3  119.67   11.62
  -2 -10  -3   88.45    9.55
   2  10   3  107.96   10.99
  -3 -10  -3  100.85    9.78
   3 -10   3  106.16   11.28
   3  10   3   97.37   10.66
  -4 -10  -3   67.74    8.68
   4 -10   3   65.86    9.75
   4  10   3   56.20    8.87
   4  10   3   61.19    8.62
   5 -10   3    4.54    5.43
   5  10   3   10.90    7.17
   5  10   3    5.75    5.22
   6 -10   3   45.23    9.43
   6  10   3   54.27    9.98
   6  10   3   48.40    8.65
   7 -10   3   20.04    8.39
   7  10   3   30.53    9.58
   7  10   3   35.05    8.48
   8 -10   3   13.41    8.33
   8  10   3   25.62   10.31
   8  10   3   11.77    7.64
   9 -10   3   35.50   10.15
   9  10   3   45.45   12.11
   9  10   3   38.42    9.72
  10 -10   3   24.00   11.04
  10 -10   3   13.17    9.09
  10  10   3   41.48   10.15
  10  10   3   36.78   12.59
  10 -11  -3   23.42   10.12
  10 -11  -3   16.22   10.53
  10 -11  -3   -2.31    8.81
  10  11  -3   15.77    8.43
  10  11  -3   19.31   11.50
   9 -11  -3    5.64    8.62
   9 -11  -3    1.59    8.01
   9 -11  -3   16.72    9.69
   9  11  -3   -3.25    9.72
   9  11  -3    8.34    7.27
   8 -11  -3    7.90    8.98
   8 -11  -3    4.26    7.33
   8 -11  -3    3.25    7.29
   8  11  -3    6.18    8.95
   8  11  -3   15.21    7.84
   8  11  -3    2.00    3.66
   7 -11  -3  147.86   15.07
   7 -11  -3  188.57   18.10
   7  11  -3  173.02   16.73
   7  11  -3  180.59   10.61
   7  11  -3  116.78   14.86
   6 -11  -3   41.15    8.95
   6 -11  -3   43.47    9.11
   6  11  -3   61.08   10.39
   6  11  -3   39.53    6.13
   5 -11  -3   31.31    8.10
   5 -11  -3   47.49    9.42
  -5  11   3   29.68    7.49
   5  11  -3   39.35    6.56
   4 -11  -3  135.69   12.76
   4 -11  -3  150.21   14.04
   4  11  -3  139.49   10.41
  -4  11   3  161.05   12.30
   3 -11  -3  188.49   12.53
   3 -11  -3  200.73   13.99
   3 -11  -3  200.52   13.93
  -3  11   3  197.26   13.66
   3  11  -3  184.97   12.18
   2 -11  -3  153.39   13.31
  -2 -11   3  108.03    8.27
   2 -11  -3  104.88   11.10
   2 -11  -3  121.62   10.41
  -2 -11   3  110.26    9.71
   2  11  -3  120.45   11.29
  -2  11   3  115.25   11.89
   1 -11  -3    1.26    4.97
  -1 -11   3    4.87    3.29
   1 -11  -3    5.52    4.90
  -1 -11   3    4.07    4.23
  -1  11   3    6.68    5.31
   1  11  -3    3.35    4.67
   0 -11   3  242.14   11.88
   0 -11  -3  230.76   14.14
   0 -11   3  219.45   13.57
   0 -11  -3  247.72   14.49
   0  11  -3  229.75   14.03
   0  11   3  228.42   14.24
   1 -11   3  590.29   24.48
  -1 -11  -3  539.85   24.37
  -1 -11  -3  510.40   23.40
   1  11   3  547.03   24.54
   2 -11   3   74.44    9.89
  -2 -11  -3   68.40    9.14
   2  11   3   73.37    9.77
   3 -11   3   71.48   10.14
  -3 -11  -3  105.08   11.04
   3  11   3   65.27    9.32
   4 -11   3  209.51   15.05
  -4 -11  -3  214.92   14.03
   4  11   3  212.22   14.28
   4  11   3  210.12   14.42
   5 -11   3   27.88    8.76
   5  11   3   23.31    8.35
   5  11   3   32.71    7.82
   6 -11   3    7.80    6.49
   6  11   3   11.73    6.59
   6  11   3    8.44    8.29
   7 -11   3   38.80    9.61
   7  11   3   32.19   10.40
   7  11   3   38.74    8.59
   8 -11   3  124.55   15.84
   8  11   3  138.44   14.36
   8  11   3  140.83   17.20
   9 -11   3   -2.25    8.19
   9  11   3   10.73    9.18
   9  11   3   20.25    8.74
  10 -11   3   19.90   10.18
  10 -11   3  -12.95    7.44
  10  11   3   -0.13   10.20
  10  11   3   11.92    8.72
  10 -12  -3   15.12   10.88
  10 -12  -3   -4.37    7.91
  10 -12  -3  -16.23    7.66
  10  12  -3   -6.12    6.88
  10  12  -3    4.96   10.21
   9 -12  -3   35.89   10.43
   9 -12  -3   19.25   10.55
   9 -12  -3   26.58   10.00
   9  12  -3   38.98   10.67
   9  12  -3   26.93   11.23
   8 -12  -3   13.41    8.38
   8 -12  -3    9.91    9.42
   8  12  -3   10.72   10.17
   8  12  -3    1.62    4.15
   8  12  -3   11.72    8.33
   7 -12  -3    5.44    7.97
   7 -12  -3   10.93    7.45
   7  12  -3   -2.22    7.06
   7  12  -3   -1.11    4.26
   6 -12  -3    8.52    7.38
   6 -12  -3    8.07    6.78
   6  12  -3    1.17    4.30
   5 -12  -3   95.02   11.48
   5 -12  -3   74.33   10.82
  -5  12   3  108.56   12.69
   5  12  -3  102.91    9.97
   4 -12  -3   37.13    7.68
   4 -12  -3   35.59    8.42
   4  12  -3   20.83    6.14
  -4  12   3   29.12    7.94
   3 -12  -3    1.16    5.80
   3 -12  -3    5.20    5.27
   3 -12  -3   -1.02    5.13
  -3  12   3   -1.81    5.14
   3  12  -3  -10.18    4.24
  -2 -12   3   10.59    4.30
  -2 -12   3   14.29    4.91
   2 -12  -3   14.15    6.82
   2 -12  -3    3.39    5.16
   2 -12  -3    7.33    4.93
   2  12  -3   12.41    5.61
  -2  12   3    6.48    6.13
   1 -12  -3   47.95    8.48
   1 -12  -3   56.41    8.44
  -1 -12   3   50.70    7.77
  -1 -12   3   63.34    6.92
   1  12  -3   57.93    8.21
  -1  12   3   48.54    8.86
   0 -12   3   -5.26    3.44
   0 -12  -3    8.94    5.48
   0 -12   3    0.77    4.70
   0 -12  -3   14.56    6.08
   0  12   3    3.75    5.69
   0  12  -3   -0.95    4.67
  -1 -12  -3  115.93   11.74
   1 -12   3  153.24   12.09
  -1 -12  -3  161.70   12.01
   1  12   3  165.21   12.99
   2 -12   3  144.44   13.33
  -2 -12  -3  113.32   11.19
   2  12   3   98.68   11.10
  -3 -12  -3   88.65   10.50
   3 -12   3  118.89   12.56
   3  12   3   92.96   10.82
   4 -12   3   36.03    8.88
   4  12   3   17.17    6.77
   5 -12   3   67.41   11.26
   5  12   3   82.96   10.80
   5  12   3   98.76   12.67
   6 -12   3    7.54    7.47
   6  12   3    7.19    6.79
   6  12   3    5.88    7.75
   7 -12   3   18.32    8.84
   7  12   3   -0.98    8.46
   7  12   3   12.62    7.54
   8 -12   3   10.26    8.73
   8  12   3   16.01    9.97
   8  12   3    5.53    7.75
   9 -12   3   18.85    9.76
   9  12   3   14.45    8.69
   9  12   3    3.38    9.40
  10 -12   3    0.87    8.54
  10 -12   3   -6.07    7.58
  10  12   3    0.19   10.27
  10  12   3   -1.45    7.94
   9 -13  -3    2.41    8.64
   9 -13  -3    0.51    9.20
   9 -13  -3   10.52    8.81
   9  13  -3   -8.52    7.73
   9  13  -3    9.22    9.85
   8 -13  -3   38.20   10.36
   8 -13  -3   39.43   12.46
   8  13  -3   37.33   10.79
   8  13  -3   40.52    6.65
   7 -13  -3   44.42   10.05
   7 -13  -3   55.65   11.63
   7  13  -3   63.83    8.24
   7  13  -3   48.76   10.98
   6 -13  -3   -2.60    7.30
   6 -13  -3   -0.41    6.29
   6  13  -3   -4.21    4.57
   5 -13  -3   18.44    7.79
   5 -13  -3    8.25    7.09
  -5  13   3   18.78    8.01
   5  13  -3    8.41    5.62
   4 -13  -3   29.90    7.70
   4 -13  -3   24.60    7.51
   4  13  -3   27.00    7.01
  -4  13   3   20.89    7.57
   3 -13  -3   16.91    7.73
   3 -13  -3   28.71    7.21
   3 -13  -3   20.49    7.59
   3  13  -3   29.30    7.03
  -3  13   3   23.37    7.98
  -2 -13   3   19.84    5.82
   2 -13  -3   18.18    7.12
   2 -13  -3   29.74    6.44
  -2 -13   3   22.78    5.43
   2 -13  -3   25.54    8.11
   2  13  -3   25.58    7.02
  -2  13   3   13.15    6.50
   1 -13  -3    1.50    5.36
  -1 -13   3    7.53    4.38
   1 -13  -3   11.64    5.14
   1 -13  -3   12.15    6.18
  -1 -13   3   12.96    5.81
  -1  13   3    5.13    6.08
   1  13  -3    1.29    5.43
   0 -13   3  108.08   11.61
   0 -13  -3  111.86   12.19
   0 -13   3   90.01    8.61
   0 -13  -3   98.74   11.23
   0  13  -3   69.33    9.53
   0  13   3   84.11   10.66
   1 -13   3   12.43    6.67
  -1 -13  -3   26.20    7.17
  -1 -13  -3   21.88    6.78
   1  13   3   18.10    6.74
  -2 -13  -3   11.69    6.74
   2 -13   3   23.56    7.42
   2  13   3    3.02    5.98
  -3 -13  -3   13.96    6.74
   3 -13   3   27.65    8.31
   3  13   3   13.31    6.60
   4 -13   3    5.48    6.55
   4  13   3    5.09    5.87
   5 -13   3    7.26    6.81
   5  13   3    6.12    6.63
   6 -13   3    3.00    6.54
   6  13   3    4.47    6.42
   6  13   3    5.96    8.25
   7 -13   3    3.15    8.12
   7  13   3  -12.37    7.90
   7  13   3    1.59    6.94
   8 -13   3   15.90    8.61
   8  13   3    2.67    9.76
   8  13   3   20.02    8.53
   9 -13   3   22.85   10.21
   9  13   3   21.87   11.10
   9  13   3   11.02    8.42
   9 -14  -3   35.45   12.83
   9 -14  -3   37.55   10.93
   9 -14  -3   35.05   11.28
   9  14  -3   25.45   10.41
   8 -14  -3   29.53   10.86
   8 -14  -3   18.43   10.04
   8  14  -3   31.18    6.72
   8  14  -3   33.48   10.62
   7 -14  -3    7.62    8.38
   7 -14  -3    9.55    8.13
   7  14  -3   10.35    9.37
   7  14  -3    7.27    5.47
   6 -14  -3   19.00    8.18
   6 -14  -3   21.44    8.66
   6  14  -3    8.95    5.91
   5 -14  -3  102.48   13.38
   5 -14  -3  169.15   15.45
   5  14  -3  129.63   12.31
  -5  14   3  130.18   16.09
   4 -14  -3   60.60   10.99
   4 -14  -3   87.96   11.19
   4  14  -3   62.01    9.34
  -4  14   3   57.31   10.54
   3 -14  -3    6.45    6.54
   3 -14  -3    6.70    6.07
   3 -14  -3    2.06    6.53
  -3 -14   3    3.75    4.71
   3  14  -3    6.31    5.91
  -3  14   3   -2.74    5.68
   2 -14  -3   62.76   10.12
  -2 -14   3   52.41    7.22
   2 -14  -3   67.20   10.92
   2 -14  -3   66.49    8.49
  -2  14   3   62.90   10.65
   2  14  -3   44.53    8.28
   1 -14  -3  323.19   19.01
   1 -14  -3  359.78   20.01
   1 -14  -3  358.41   17.13
  -1 -14   3  349.07   18.78
  -1 -14   3  328.91   16.35
  -1  14   3  367.97   20.91
   1  14  -3  332.79   18.99
   0 -14  -3   87.44   11.15
   0 -14  -3   51.04    9.07
   0 -14   3   75.09    8.44
   0 -14   3   63.53    9.26
   0  14  -3   84.68   11.13
   0  14   3   73.77   10.82
  -1 -14  -3   77.97   10.65
   1 -14   3   64.28    9.96
  -1 -14  -3   49.09    8.60
   1  14   3   63.64   10.38
  -2 -14  -3  313.07   18.17
  -2 -14  -3  293.10   17.96
   2 -14   3  344.19   19.66
   2  14   3  300.26   18.33
  -3 -14  -3  413.73   22.57
   3 -14   3  420.06   23.01
   3  14   3  479.18   23.64
   4 -14   3   29.65    8.90
   4  14   3   34.30    8.42
   5 -14   3   71.72   12.28
   5  14   3   96.52   12.43
   6 -14   3  258.38   20.17
   6  14   3  275.75   18.08
   7 -14   3   15.49    8.88
   7  14   3   17.76   10.00
   7  14   3   -2.51    7.10
   8 -14   3   16.80   10.11
   8  14   3   -3.57    9.23
   8  14   3    8.09    8.34
   9 -14   3   -0.46    8.67
   9  14   3    0.00    7.80
   9  14   3   -1.09   10.30
   9 -15  -3   24.05   11.96
   9 -15  -3   34.35   10.34
   9 -15  -3   47.04   12.66
   9  15  -3   35.87   11.47
   8 -15  -3   -2.48    7.66
   8 -15  -3   -5.27    9.41
   8  15  -3    5.78    8.49
   8  15  -3   -2.75    5.18
   7 -15  -3   27.20    9.96
   7 -15  -3   16.67    9.25
   7  15  -3   22.96    9.99
   7  15  -3   23.53    6.88
   6 -15  -3   19.06    8.52
   6 -15  -3    9.04    8.10
   6  15  -3   15.27    7.02
   5 -15  -3   -6.37    6.23
   5 -15  -3   -3.78    7.28
   5  15  -3   -0.93    5.83
   4 -15  -3   23.32    7.77
   4 -15  -3    2.48    7.41
  -4  15   3   10.20    7.61
   4  15  -3   17.14    7.05
   3 -15  -3   39.24    9.53
   3 -15  -3   41.02    8.43
  -3 -15   3   46.72    7.89
   3 -15  -3   44.12   10.00
  -3  15   3   50.22   10.01
   3  15  -3   40.98    8.64
   2 -15  -3   13.96    8.10
  -2 -15   3   10.06    5.36
   2 -15  -3    7.27    5.65
   2 -15  -3    5.32    6.68
   2  15  -3    0.58    5.66
  -2  15   3   12.05    7.63
   1 -15  -3   11.08    7.45
   1 -15  -3    6.24    6.46
  -1 -15   3    5.26    5.89
  -1 -15   3    5.09    4.64
   1  15  -3    0.75    6.29
  -1  15   3    0.17    6.57
   0 -15  -3   33.90    8.89
   0 -15   3   40.34    8.91
   0 -15  -3   44.10    9.03
   0 -15   3   44.15    7.30
   0  15   3   46.10    9.28
   0  15  -3   32.20    8.16
  -1 -15  -3   51.34   10.22
   1 -15   3   52.89    9.94
  -1 -15  -3   46.07    9.22
   1  15   3   33.17    9.02
  -2 -15  -3   15.35    6.80
  -2 -15  -3   16.23    6.91
   2 -15   3   22.18    8.57
   2  15   3   19.09    7.57
   3 -15   3   -7.44    5.77
   3  15   3   11.69    6.33
   4 -15   3   -4.48    6.44
   4  15   3    1.17    6.05
   5 -15   3   61.41   11.31
   5  15   3   62.30   10.57
   6 -15   3   -6.03    7.45
   6  15   3   -3.99    6.53
   7 -15   3   -1.82    8.23
   7  15   3   30.85    9.22
   8 -15   3   10.31    8.78
   8  15   3   28.65    9.86
   8  15   3   -8.69    8.37
   8 -16  -3   22.95   10.38
   8 -16  -3   32.61   11.50
   8  16  -3   15.43   10.06
   8  16  -3   37.51    7.65
   7 -16  -3    5.35    8.81
   7 -16  -3    1.43    8.01
   7  16  -3   -0.52    7.84
   7  16  -3    7.13    6.48
   6 -16  -3    6.82    8.26
   6 -16  -3   -4.29    7.59
   6  16  -3    2.70    6.57
   5 -16  -3    7.06    7.58
   5 -16  -3    9.15    7.77
   5  16  -3   10.44    6.62
   4 -16  -3   26.60    9.49
   4 -16  -3   29.69    8.74
  -4  16   3    8.71    7.32
   4  16  -3   29.34    8.29
   3 -16  -3    6.60    7.35
   3 -16  -3    2.81    7.12
  -3 -16   3    1.44    5.95
   3  16  -3    6.16    6.30
  -3  16   3   15.90    8.24
   2 -16  -3   42.10    9.78
  -2 -16   3   22.38    6.61
   2 -16  -3   24.88    9.12
   2  16  -3   30.55    8.81
  -2  16   3   26.55    8.88
   1 -16  -3   32.49    8.70
  -1 -16   3   61.15    8.42
   1 -16  -3   58.79   10.51
  -1  16   3   51.22   10.02
   1  16  -3   41.90    9.13
   0 -16  -3   57.05    9.95
   0 -16   3   33.85    8.77
   0 -16  -3   29.52    8.33
   0 -16   3   46.62    8.10
   0  16  -3   30.68    8.49
   0  16   3   38.36    9.16
  -1 -16  -3   -1.56    5.83
  -1 -16  -3    0.11    6.21
   1 -16   3   -0.92    6.51
   1  16   3  -11.46    6.62
  -2 -16  -3   92.91   12.19
  -2 -16  -3   96.80   12.29
   2 -16   3   85.89   12.69
   2  16   3   73.22   11.64
   3 -16   3    6.89    7.21
  -3 -16  -3   22.54    8.27
   3  16   3   10.71    7.24
   4 -16   3   -8.66    6.59
   4  16   3   -5.96    6.31
   5 -16   3  103.64   15.26
   5  16   3   77.28   12.46
   6 -16   3   33.00   10.93
   6  16   3   40.74   10.31
   7 -16   3   -6.01    7.76
   7  16   3   12.76    8.76
   8 -16   3   -2.11    8.03
   8  16   3    3.67    8.30
   8 -17  -3   51.14   12.27
   8  17  -3   50.18   12.79
   8  17  -3   63.75    9.98
   7 -17  -3   23.20   10.14
   7  17  -3    6.29    7.05
   7  17  -3    7.37    9.70
   6 -17  -3   -3.43    7.72
   6  17  -3   13.12    7.32
   5 -17  -3   -4.41    7.67
   5  17  -3    6.95    6.99
   4 -17  -3  119.97   16.10
  -4  17   3  147.46   17.21
   4  17  -3  117.39   13.67
   3 -17  -3  253.52   19.92
  -3  17   3  220.37   20.43
   3  17  -3  238.06   16.93
   2 -17  -3   46.44   10.02
   2 -17  -3   41.74   10.99
  -2  17   3   39.03   10.69
   2  17  -3   50.43   10.18
   1 -17  -3   49.14   10.20
  -1 -17   3   62.40    9.20
   1 -17  -3   69.55   12.06
   1  17  -3   76.72   12.02
  -1  17   3   47.41   10.42
   0 -17   3  321.22   20.41
   0 -17  -3  315.65   20.45
   0 -17  -3  300.33   19.64
   0 -17   3  324.75   17.69
   0  17   3  363.04   22.53
   1 -17   3  139.13   14.61
  -1 -17  -3  126.71   14.64
  -1 -17  -3  142.81   14.37
   1  17   3  172.44   17.56
   2 -17   3    6.61    8.33
  -2 -17  -3   11.13    7.72
   2  17   3    0.92    7.21
   3 -17   3    1.44    7.61
  -3 -17  -3   11.67    7.77
   3  17   3   -0.96    6.99
   4 -17   3   94.37   14.79
   4  17   3   69.38   12.07
   5 -17   3    9.25    9.01
   5  17   3   30.39    9.52
   6 -17   3   -1.46    8.55
   6  17   3   -0.15    7.08
   7 -17   3   -4.80    8.37
   7  17   3    3.94    8.85
   7 -18  -3    1.57    9.60
   7  18  -3    0.38    6.73
   7  18  -3   -3.98    8.90
   6 -18  -3    7.04    9.18
   6  18  -3   10.87    7.73
   5 -18  -3   58.45   12.52
   5  18  -3   50.59   10.46
   4 -18  -3    5.41    7.77
   4  18  -3   12.41    7.26
  -4  18   3    6.97    7.96
   3 -18  -3    3.04    7.47
  -3  18   3    6.39    8.16
   3  18  -3    7.11    7.30
   2 -18  -3   28.28    9.36
   2 -18  -3   17.62    9.82
  -2  18   3   18.02    8.85
   2  18  -3   54.72   10.83
   1 -18  -3   32.90    9.42
   1 -18  -3   10.41    8.69
   1  18  -3    7.64    7.28
  -1  18   3   25.66    9.51
   0 -18  -3   16.27    8.55
   0 -18  -3    0.59    6.90
   0  18   3   -2.13    6.79
   1 -18   3    3.49    7.28
  -1 -18  -3    4.90    7.56
  -1 -18  -3  -10.97    7.02
   1  18   3   -3.27    7.14
  -2 -18  -3   26.27    8.72
   2 -18   3    8.37    8.46
   2  18   3   -0.01    7.01
  -3 -18  -3   27.55    9.70
   3 -18   3   37.19   11.20
   3  18   3   27.72    9.53
   4 -18   3    6.64    7.95
  -4 -18  -3    8.88    8.66
   4  18   3    7.64    8.18
   5 -18   3    7.39    9.57
   5  18   3    1.23    7.73
   6 -18   3   50.19   13.28
   6  18   3   28.72   10.00
   7 -18   3   27.00   10.74
   7  18   3   13.87    9.62
   6 -19  -3   24.23   10.88
   6  19  -3   16.76    8.59
   5 -19  -3   -8.45    7.58
   5  19  -3    9.19    7.87
   4 -19  -3   10.39    9.28
   4  19  -3   11.08    8.11
  -4  19   3   10.51    9.05
   3 -19  -3   33.55   11.38
   3  19  -3   40.97    9.93
  -3  19   3   29.62   10.64
   2 -19  -3   17.93   10.19
   2 -19  -3   -1.71    7.62
   2  19  -3    7.79    8.09
  -2  19   3    6.49    8.51
   1 -19  -3   -0.06    7.60
   1 -19  -3   -4.51    6.81
   1  19  -3  -14.23    5.93
  -1  19   3    7.39    8.48
   0 -19  -3   10.86    8.79
   0 -19  -3   10.82    8.50
   0  19   3   -0.65    7.76
  -1 -19  -3  -11.85    6.35
   1  19   3   -2.51    8.05
  -2 -19  -3  -11.07    6.62
   2 -19   3    5.28    8.42
   2  19   3   10.86    8.09
  -3 -19  -3   -1.11    7.78
   3 -19   3   13.26    9.69
   3  19   3    3.02    8.06
   4 -19   3   -3.81    8.33
  -4 -19  -3    7.11    8.63
   4  19   3    0.25    7.69
   5 -19   3   -8.95    7.41
   5  19   3    7.24    8.79
   6 -19   3   -1.01    9.57
   6  19   3   -4.06    8.33
   5 -20  -3   41.75   11.61
   5  20  -3   40.51   10.22
   4 -20  -3   18.22   10.47
   4  20  -3   21.97    9.25
  -4  20   3   32.81   11.53
   3 -20  -3   -4.45    8.30
   3  20  -3   11.03    8.54
  -3  20   3   27.64   11.04
   2 -20  -3  166.54   20.26
   2 -20  -3  178.06   18.86
  -2  20   3  138.90   18.28
   2  20  -3  204.55   19.79
   1 -20  -3   52.84   12.71
   1 -20  -3   68.44   13.24
  -1  20   3   74.03   14.46
   0 -20  -3   -5.44    7.79
   0 -20  -3    3.84    8.83
   0  20   3   -5.97    6.66
  -1 -20  -3   13.14    8.72
   1  20   3    4.28    8.61
   2 -20   3  183.49   19.67
  -2 -20  -3  212.72   20.12
   2  20   3  122.04   16.59
  -3 -20  -3   46.59   11.59
   3 -20   3   54.56   12.96
   3  20   3   43.03   11.46
   4 -20   3    9.04    9.65
  -4 -20  -3   -5.67    8.14
   4  20   3   -6.12    7.14
  -5 -20  -3   22.50   10.77
   5 -20   3   28.28   12.01
   5  20   3   25.84   10.95
   4 -21  -3   29.92   11.64
   4  21  -3   29.81   10.00
   3 -21  -3   50.60   13.25
  -3  21   3   52.59   12.79
   3  21  -3   41.35   11.17
   2 -21  -3   -5.06    8.65
   2 -21  -3   -6.36    8.41
  -2  21   3    0.34    7.49
   2  21  -3    0.08    8.04
   1 -21  -3   -0.78    8.46
   1 -21  -3  -10.51    8.49
  -1  21   3   -0.83    8.45
   0 -21  -3    5.20    8.95
   0  21   3    5.20    9.37
  -1 -21  -3   -0.51    8.64
   1  21   3   28.08   10.70
  -2 -21  -3    9.38    9.32
   2  21   3    0.34    8.00
  -3 -21  -3   15.96    9.65
   3 -21   3   17.75   10.99
   3  21   3   10.50    8.89
  -4 -21  -3   24.11   11.41
   4 -21   3   25.75   10.88
   4  21   3   29.91   10.98
   3 -22  -3   11.23   10.39
  -3  22   3    6.19    9.91
   3  22  -3    9.04    8.54
   2 -22  -3    3.99   10.10
   2 -22  -3   16.22    9.75
  -2  22   3    4.83    9.34
   1 -22  -3   -2.78    9.09
   1 -22  -3    6.51    9.10
  -1  22   3   -2.70    9.04
   0 -22  -3   -9.14    7.80
   0  22   3   -0.67    9.03
  -1 -22  -3    0.76    8.26
   1  22   3   -5.67    8.70
  -2 -22  -3   12.86    9.35
   2  22   3    6.80    9.01
  12   0  -4   -0.16   10.76
  12   0  -4    0.85   10.62
  11   0  -4  -20.45    7.90
  11   0  -4  -11.67    9.13
  10   0  -4  108.75   14.22
  10   0  -4  116.14   15.37
   9   0  -4    8.29    7.69
   9   0  -4   15.14    3.75
   9   0  -4   11.23    8.93
   8   0  -4   -5.47    6.22
   8   0  -4   -2.28    2.36
   8   0  -4   10.92    8.08
   8   0  -4   -5.60    3.93
   7   0  -4  227.19   12.82
   7   0  -4  213.26    9.27
   7   0  -4  226.08   15.24
   7   0  -4  214.26   14.67
   6   0  -4  706.95   27.61
   6   0  -4  713.21   24.02
   6   0  -4  700.05   30.26
   6   0  -4  716.02   24.00
   6   0  -4  705.83   28.66
   5   0  -4    0.83    3.96
   5   0  -4    3.57    4.70
   5   0  -4   -0.97    1.82
   5   0  -4    1.08    4.22
   5   0  -4    3.38    1.73
   4   0  -4  303.44   14.41
   4   0  -4  312.88   10.77
   4   0  -4  278.19   14.50
   4   0  -4  292.96   13.71
   4   0  -4  289.53   10.76
   3   0  -4  138.47    6.24
   3   0  -4  142.81    8.98
   3   0  -4  142.21    6.15
   3   0  -4  136.37    9.18
   3   0  -4  129.13    8.03
   2   0  -4  100.23    7.74
  -2   0   4   88.82    5.02
   2   0  -4   99.79    5.64
   2   0  -4  103.96    6.06
   2   0  -4  101.96    5.46
   1   0  -4    5.40    3.15
  -1   0   4   11.30    2.84
   1   0  -4    8.10    3.97
   1   0  -4    6.25    2.86
   0   0  -4  299.63   13.02
   0   0  -4  316.92   13.19
   0   0   4  332.74   12.91
   1   0   4  200.29    9.90
   2   0   4  188.67   10.41
   3   0   4    6.64    3.82
   3   0   4    5.15    4.36
   4   0   4  476.88   19.84
   4   0   4  473.68   20.11
   5   0   4  867.14   32.36
  -5   0  -4  838.20   31.54
   5   0   4  796.06   31.60
   6   0   4   93.06   10.77
  -6   0  -4  115.80   10.51
   6   0   4  126.32   11.18
   7   0   4   60.41    8.88
   7   0   4   29.87    8.12
   8   0   4  121.17   12.38
   8   0   4  107.32   13.43
   9   0   4  144.20   14.03
  10   0   4    7.08    7.28
  10   0   4   19.81    9.52
  11   0   4   23.24   11.28
  11   0   4   25.86    9.19
  11  -1  -4  -13.85    8.58
  11  -1  -4   11.86    9.58
  11   1  -4   33.33   11.75
  11   1  -4   17.87   11.50
  10  -1  -4   60.15   12.81
  10  -1  -4   30.76   10.24
  10   1  -4   38.12   11.42
  10   1  -4   55.09   12.57
   9  -1  -4    3.83    7.76
   9  -1  -4    7.52    3.52
   9  -1  -4    6.31    8.23
   9   1  -4   11.53    8.17
   9   1  -4    6.70    8.49
   8  -1  -4   -6.70    7.07
   8  -1  -4    6.57    3.26
   8  -1  -4    6.74    7.14
   8   1  -4    2.80    6.65
   8   1  -4   14.22    5.08
   8   1  -4    5.38    2.35
   8   1  -4    0.45    6.71
   7  -1  -4    3.50    2.78
   7  -1  -4    1.90    5.78
   7  -1  -4    3.53    4.24
   7  -1  -4   -2.38    5.68
   7   1  -4   12.93    6.93
   7   1  -4    5.25    2.05
   7   1  -4    3.60    4.61
   7   1  -4   14.74    6.93
   6  -1  -4  115.97   10.56
   6  -1  -4   98.65    6.04
   6  -1  -4  109.02    5.83
   6  -1  -4   99.41   11.44
   6  -1  -4   98.75    8.86
   6   1  -4   98.21    4.45
   6   1  -4   91.45    9.74
   6   1  -4   97.10   11.01
   6   1  -4   96.92    4.50
   6   1  -4  114.23    8.91
   5  -1  -4  422.73   18.12
   5  -1  -4  416.99   19.84
   5  -1  -4  444.05   15.66
   5  -1  -4  425.01   18.41
   5  -1  -4  428.89   15.43
   5   1  -4  404.96   18.45
   5   1  -4  409.04   18.65
   5   1  -4  424.58   19.83
   4  -1  -4    4.10    2.13
   4  -1  -4    5.32    2.56
   4  -1  -4    1.71    3.96
   4  -1  -4    3.30    3.77
   4  -1  -4    5.02    3.95
   4   1  -4    5.01    4.05
   4   1  -4   -2.88    3.79
   4   1  -4    7.51    4.48
   3  -1  -4   31.78    3.41
   3  -1  -4   27.99    4.47
   3  -1  -4   31.13    3.52
   3  -1  -4   24.34    4.97
   3  -1  -4   31.98    5.50
   3   1  -4   30.69    2.47
  -3   1   4   28.74    3.17
   3   1  -4   27.33    4.84
   3   1  -4   29.67    5.24
   3   1  -4   28.99    5.24
   3   1  -4   32.42    2.56
   2  -1  -4   21.67    3.37
  -2  -1   4   28.88    2.82
   2  -1  -4   25.72    3.68
   2  -1  -4   25.78    4.65
   2  -1  -4   34.71    3.81
  -2   1   4   26.70    3.36
   2   1  -4   26.54    4.24
   2   1  -4   25.03    2.99
   2   1  -4   25.77    4.34
   2   1  -4   29.25    3.18
   2   1  -4   24.52    5.07
   1  -1  -4   49.43    4.77
   1  -1  -4   55.39    5.15
  -1  -1   4   64.17    4.68
   1   1  -4   67.48    5.06
   1   1  -4   55.45    5.86
  -1   1   4   60.46    5.12
   0  -1   4  222.65   10.04
   0  -1  -4  235.60   10.77
   0   1  -4  228.72   10.70
   0   1   4  226.21   10.28
  -1  -1  -4    5.86    3.66
   1  -1   4    1.83    3.75
   1   1   4   12.14    4.03
  -1   1  -4   10.83    3.36
  -2  -1  -4   32.00    5.76
   2  -1   4   37.90    5.64
   2   1   4   36.45    5.41
   2   1   4   30.13    4.41
  -3  -1  -4   47.16    6.24
   3  -1   4   31.38    5.22
   3   1   4   45.38    6.26
   3   1   4   54.38    6.28
  -4  -1  -4   28.18    5.71
   4  -1   4   23.38    5.08
   4   1   4   31.29    6.13
   4   1   4   28.16    5.52
  -5  -1  -4   10.42    4.83
   5  -1   4   11.87    5.60
   5  -1   4   13.67    5.13
   5   1   4   14.24    5.06
   5   1   4    9.41    4.88
   6  -1   4    4.94    4.72
  -6  -1  -4    3.45    4.73
   6  -1   4    7.83    5.76
   6   1   4    5.40    5.24
   6   1   4    0.68    5.22
   7  -1   4   13.56    6.05
   7  -1   4   15.64    7.26
   7   1   4    7.65    5.37
   7   1   4   17.46    6.98
   8  -1   4    0.13    5.61
   8  -1   4    7.89    7.38
   8   1   4   -1.54    5.90
   8   1   4   -2.70    5.30
   9  -1   4    6.32    7.84
   9  -1   4   13.32    6.84
   9   1   4    6.04    7.99
   9   1   4   11.39    6.76
  10  -1   4   85.79   14.78
  10  -1   4  109.15   13.01
  10   1   4   80.68   14.04
  10   1   4   91.95   11.97
  11  -1   4    5.75    9.53
  11  -1   4   -0.17    7.14
  11   1   4   13.21   10.95
  11   1   4   -3.75    7.19
  11  -2  -4   -3.03    8.21
  11  -2  -4   -4.43    9.22
  11   2  -4   13.61   10.31
  11   2  -4   -9.98    8.41
  10  -2  -4   14.37   10.60
  10  -2  -4   20.87   10.22
  10  -2  -4   15.72    4.61
  10   2  -4   -4.81    8.18
  10   2  -4   11.27    9.42
   9  -2  -4   99.93   13.67
   9  -2  -4  117.83   15.51
   9  -2  -4  117.31    8.36
   9   2  -4   99.86   14.41
   9   2  -4  120.22   14.41
   8  -2  -4  135.46    8.60
   8  -2  -4  123.81   14.59
   8  -2  -4  123.94   13.55
   8   2  -4  138.36   14.39
   8   2  -4  145.81   10.86
   8   2  -4  120.31   13.92
   7  -2  -4  145.50   13.97
   7  -2  -4  123.76   12.31
   7  -2  -4  116.00    7.67
   7   2  -4  123.79   13.13
   7   2  -4  104.03   11.61
   7   2  -4  136.26   11.25
   6  -2  -4   89.45   10.48
   6  -2  -4   92.52    9.78
   6  -2  -4   90.94    6.63
   6   2  -4  103.30   10.85
   6   2  -4   95.19   10.60
   6   2  -4   98.43    9.44
   5  -2  -4   14.30    3.71
   5  -2  -4   27.71    5.59
   5  -2  -4   24.09    5.89
   5  -2  -4   18.05    3.30
   5   2  -4   24.47    6.28
   5   2  -4   14.08    5.34
   5   2  -4   16.13    5.19
   4  -2  -4  221.78   11.33
   4  -2  -4  232.59    9.95
   4  -2  -4  227.87   13.09
   4  -2  -4  232.73   10.13
   4   2  -4  220.16   12.23
   4   2  -4  237.56   12.33
   4   2  -4  220.55   12.11
   3  -2  -4   95.99    6.65
   3  -2  -4  104.71    8.06
   3  -2  -4  105.78    6.40
   3  -2  -4  104.56    6.17
  -3   2   4   98.74    5.91
   3   2  -4  104.46    7.79
   3   2  -4  100.40    4.32
   3   2  -4  114.71    8.91
   3   2  -4   99.88    7.66
   2  -2  -4   56.59    5.30
   2  -2  -4   62.34    4.39
  -2  -2   4   52.50    3.54
   2   2  -4   56.99    4.10
   2   2  -4   60.37    6.40
   2   2  -4   72.68    6.28
   2   2  -4   56.73    5.76
  -2   2   4   61.91    5.09
   1  -2  -4    6.74    3.39
   1  -2  -4    3.05    3.19
  -1  -2   4    3.65    2.49
  -1   2   4    4.26    2.90
   1   2  -4    3.66    3.54
   1   2  -4    0.19    2.73
   0  -2   4  166.98    8.28
   0   2   4  151.64    8.53
   0   2  -4  160.55    8.58
   1  -2   4   -0.91    3.62
  -1  -2  -4   -3.42    3.83
   1   2   4   -0.08    2.26
   1   2   4   -1.90    3.07
  -1   2  -4    1.00    2.91
   2  -2   4   16.12    4.88
  -2  -2  -4   10.34    4.30
   2   2   4   19.81    3.90
  -2   2  -4   19.65    3.32
   2   2   4   20.65    4.49
   3  -2   4   57.43    7.21
  -3  -2  -4   41.84    5.75
   3   2   4   52.37    6.03
   3   2   4   35.16    5.44
   4  -2   4   24.57    5.08
  -4  -2  -4   22.41    5.12
   4   2   4   24.79    5.74
   4   2   4   27.10    5.60
  -5  -2  -4  113.23    9.04
   5  -2   4  128.75   10.01
   5   2   4  115.27    9.29
   5   2   4  134.62   10.25
  -6  -2  -4   17.54    5.45
   6  -2   4   19.00    6.21
   6  -2   4   14.96    5.47
   6   2   4   16.65    5.67
   6   2   4   17.28    6.32
   7  -2   4   30.27    7.23
   7  -2   4   31.66    8.95
   7   2   4   19.36    7.35
   7   2   4   36.64    7.05
   8  -2   4   55.65    9.23
   8  -2   4   52.95   11.08
   8   2   4   68.74    9.50
   8   2   4   42.72    9.04
   9  -2   4   15.58    9.23
   9  -2   4    6.35    6.91
   9   2   4   14.52    7.24
   9   2   4   15.81    9.09
  10  -2   4   -0.95    8.92
  10  -2   4   -6.65    6.62
  10   2   4   -0.73    6.62
  10   2   4   -8.31    7.58
  11  -2   4   -0.83    7.76
  11  -2   4    6.48    9.97
  11   2   4   -3.01    6.71
  11   2   4    7.40   10.39
  11  -3  -4    3.02    9.96
  11  -3  -4   -2.13    9.14
  11   3  -4    8.58    9.95
  11   3  -4    1.37    9.68
  10  -3  -4    6.83    4.69
  10  -3  -4    7.86    8.83
  10  -3  -4   11.11    9.48
  10   3  -4    0.11    7.69
  10   3  -4    6.64    9.06
   9  -3  -4   53.74   10.87
   9  -3  -4   52.21    6.68
   9  -3  -4   17.23    8.87
   9   3  -4   33.80   10.53
   9   3  -4   44.95   10.12
   8  -3  -4  127.20   13.48
   8  -3  -4  169.07   16.51
   8  -3  -4  168.74   10.12
   8   3  -4  171.23   16.29
   8   3  -4  175.14   15.94
   8   3  -4  171.66   12.14
   7  -3  -4   -5.21    5.04
   7  -3  -4    6.39    3.86
   7  -3  -4    3.89    6.40
   7   3  -4   -8.66    3.82
   7   3  -4    4.25    5.90
   7   3  -4   -2.22    5.94
   6  -3  -4   97.69    9.60
   6  -3  -4   75.44    7.10
   6  -3  -4   96.37   10.93
   6   3  -4   79.49    9.82
   6   3  -4   78.28    9.47
   6   3  -4   80.20    8.78
   5  -3  -4  237.59   14.02
   5  -3  -4  232.37   10.56
   5  -3  -4  237.49   11.22
   5  -3  -4  219.04   12.00
   5   3  -4  213.14   13.32
   5   3  -4  236.61   13.30
   5   3  -4  207.66   12.67
   4  -3  -4  347.46   13.94
   4  -3  -4  333.79   14.44
   4  -3  -4  364.67   17.35
   4  -3  -4  344.76   14.30
   4   3  -4  317.62   15.44
   4   3  -4  343.77   16.16
  -4   3   4  351.49   13.79
   4   3  -4  350.28   16.09
   3  -3  -4  194.55    9.62
   3  -3  -4  198.54    9.15
   3  -3  -4  195.10   11.48
   3   3  -4  191.37   11.09
   3   3  -4  176.74   10.63
  -3   3   4  196.49    9.15
   3   3  -4  181.41    9.96
   3   3  -4  197.33    7.32
  -2  -3   4  402.35   14.55
   2  -3  -4  418.24   14.71
   2  -3  -4  429.27   16.68
   2  -3  -4  412.90   16.78
   2   3  -4  427.70   16.32
  -2   3   4  406.98   16.05
   2   3  -4  435.68   15.03
   2   3  -4  427.63   17.55
   1  -3  -4  228.96   10.94
  -1  -3   4  230.98    9.86
   1  -3  -4  236.57   11.21
   1   3  -4  225.19   11.46
  -1   3   4  239.22   10.83
   0  -3  -4  374.64   15.39
   0  -3   4  356.11   14.81
   0   3   4  379.31   15.37
   0   3  -4  383.00   15.11
   1  -3   4    1.02    3.72
  -1  -3  -4   -1.68    3.50
   1   3   4   -1.28    2.33
  -1   3  -4    4.49    3.08
   1   3   4    4.29    3.85
  -2  -3  -4  398.83   17.70
   2  -3   4  421.52   17.86
   2   3   4  458.54   18.12
   2   3   4  450.06   16.61
  -2   3  -4  434.54   15.81
   3  -3   4  906.30   34.42
  -3  -3  -4  963.67   34.30
   3   3   4  959.55   33.21
   3   3   4  951.69   34.20
  -4  -3  -4  183.08   11.10
   4  -3   4  184.26   11.64
   4   3   4  197.91   11.45
   4   3   4  193.40   11.15
   5  -3   4   97.81    9.52
  -5  -3  -4  116.05    9.03
   5   3   4   95.19    9.49
   5   3   4  108.05    9.68
  -6  -3  -4  161.63   11.26
   6  -3   4  182.89   12.45
   6  -3   4  194.21   13.44
   6   3   4  163.22   12.03
   6   3   4  168.14   11.63
   7  -3   4  150.60   14.37
   7  -3   4  176.70   12.82
   7   3   4  172.28   12.51
   7   3   4  158.18   14.27
   8  -3   4   -1.18    5.78
   8  -3   4    0.17    7.14
   8   3   4    2.24    5.54
   8   3   4    0.45    6.65
   9  -3   4   76.67   12.68
   9  -3   4   98.36   11.83
   9   3   4   64.80   12.33
   9   3   4   71.26   10.29
  10  -3   4   53.05   10.49
  10  -3   4   49.60   12.78
  10   3   4   45.10   12.49
  10   3   4   52.44    9.95
  11  -3   4    6.02    9.62
  11  -3   4   -1.17    7.47
  11   3   4   11.13    8.22
  11   3   4    0.31    9.20
  11  -4  -4   30.47   11.80
  11  -4  -4   39.73    7.28
  11  -4  -4   19.85   11.13
  11   4  -4   59.69   13.62
  11   4  -4   19.07   10.26
  10  -4  -4   32.23   11.88
  10  -4  -4   46.06    7.34
  10  -4  -4   44.84   11.18
  10   4  -4   36.26   10.65
  10   4  -4   28.87   11.67
   9  -4  -4   -4.13    8.42
   9  -4  -4   -0.45    4.22
   9  -4  -4    3.86    7.64
   9   4  -4  -15.74    6.23
   9   4  -4   11.90    8.98
   8  -4  -4   30.93   10.15
   8  -4  -4   38.80    6.57
   8  -4  -4   41.91    9.09
   8   4  -4   58.64    8.32
   8   4  -4   21.59    9.07
   8   4  -4   41.53    9.22
   7  -4  -4   74.71    7.84
   7  -4  -4   51.54    9.63
   7  -4  -4   61.09    9.00
   7   4  -4   60.54    8.51
   7   4  -4   85.43   11.57
   7   4  -4   66.23    9.69
   6  -4  -4   87.84    9.20
   6  -4  -4   91.11    8.31
   6  -4  -4   79.45   10.26
   6   4  -4   92.15   10.04
   6   4  -4   84.96    9.19
   6   4  -4   73.83   10.04
   5  -4  -4    0.04    3.94
   5  -4  -4    8.10    5.79
   5  -4  -4    8.83    4.15
   5   4  -4    9.64    5.85
   5   4  -4    6.73    4.32
   5   4  -4    9.72    4.97
   4  -4  -4   47.13    5.84
   4  -4  -4   46.47    7.17
   4  -4  -4   44.07    5.75
   4   4  -4   46.21    7.19
   4   4  -4   41.03    5.94
  -4   4   4   66.22    6.26
   4   4  -4   43.92    2.74
   4   4  -4   57.44    7.52
   3  -4  -4  947.48   32.81
   3  -4  -4  949.14   34.79
   3  -4  -4  938.75   31.41
   3   4  -4  944.71   30.54
   3   4  -4  934.97   32.88
  -3   4   4  905.59   32.34
   3   4  -4  926.99   33.61
   3   4  -4  896.82   33.85
   2  -4  -4  140.78    9.17
   2  -4  -4  144.15    9.00
  -2  -4   4  149.93    6.86
   2   4  -4  149.71    7.74
  -2   4   4  145.18    8.24
   2   4  -4  148.04    9.54
   2   4  -4  156.50    7.30
  -1  -4   4   54.24    4.99
   1  -4  -4   51.40    6.02
   1  -4  -4   50.23    6.09
  -1   4   4   56.08    6.10
   1   4  -4   45.15    6.10
   0  -4  -4  211.67   10.54
   0  -4  -4  185.24   10.34
   0  -4   4  187.59    9.77
   0   4  -4  185.02    9.94
   0   4   4  206.77   10.59
   1  -4   4  121.73    8.37
  -1  -4  -4  119.26    9.29
   1   4   4  102.97    6.09
  -1   4  -4  113.31    7.25
   1   4   4  102.32    7.73
   2  -4   4   67.75    7.10
  -2  -4  -4   65.47    6.93
   2   4   4   68.92    7.06
   2   4   4   84.10    6.58
  -2   4  -4   68.08    5.35
  -3  -4  -4  158.08    9.95
   3  -4   4  152.48    9.99
   3   4   4  154.82    9.50
   3   4   4  148.30    9.99
  -3   4  -4  145.38    6.89
  -4  -4  -4   11.80    4.83
   4  -4   4    9.54    4.97
   4   4   4   15.56    4.81
   4   4   4   12.01    4.64
   5  -4   4   45.65    7.31
  -5  -4  -4   54.05    7.20
   5   4   4   40.36    6.87
   5   4   4   48.00    7.32
  -6  -4  -4    5.90    4.56
   6  -4   4    2.25    4.87
   6   4   4   -2.93    5.52
   6   4   4   -0.58    4.57
   7  -4   4   86.45   10.37
   7  -4   4   52.03    9.77
   7   4   4   56.93    9.33
   7   4   4   58.41    8.45
   8  -4   4   54.30   11.20
   8  -4   4   69.37   10.35
   8   4   4   64.70    9.41
   8   4   4   64.63   11.59
   9  -4   4   -4.61    6.89
   9  -4   4   -6.65    5.83
   9   4   4   -7.40    7.64
   9   4   4    1.77    6.09
  10  -4   4  -19.43    7.31
  10  -4   4    4.75    7.09
  10   4   4   -8.44    6.68
  10   4   4   -7.48    8.42
  11  -4   4   20.35    9.13
  11  -4   4   -0.98    8.83
  11   4   4   18.95    8.82
  11   4   4   -1.28    9.24
  11  -5  -4    0.95    9.17
  11  -5  -4   22.99   11.04
  11  -5  -4    5.75    5.85
  11   5  -4    3.47   10.23
  10  -5  -4   -0.77    7.42
  10  -5  -4    3.56    9.79
  10  -5  -4    1.14    5.20
  10   5  -4   -5.22    8.96
  10   5  -4    9.01    8.80
   9  -5  -4    0.46    7.10
   9  -5  -4    3.60    5.17
   9  -5  -4    2.82    8.12
   9   5  -4    7.75    8.77
   9   5  -4    2.36    7.04
   9   5  -4    5.50    5.04
   8  -5  -4   34.60    6.83
   8  -5  -4   42.39   10.49
   8  -5  -4   37.55    8.88
   8   5  -4   33.09    8.04
   8   5  -4   11.70    8.50
   8   5  -4   28.53    7.21
   7  -5  -4  123.47   14.32
   7  -5  -4  132.95   12.75
   7  -5  -4  136.36   10.39
   7   5  -4  120.72   13.82
   7   5  -4  110.44   11.43
   7   5  -4  137.98   12.87
   6  -5  -4  190.94   12.36
   6  -5  -4  181.00   11.66
   6  -5  -4  208.43   14.36
   6   5  -4  182.26   14.11
   6   5  -4  206.64   12.88
   6   5  -4  191.57   13.14
   5  -5  -4   70.31    7.75
   5  -5  -4   73.10    7.61
   5  -5  -4   53.27    8.35
   5   5  -4   59.79    8.56
   5   5  -4   66.86    9.18
   5   5  -4   70.65    7.80
   5   5  -4   67.51    3.51
   4  -5  -4   11.11    5.14
   4  -5  -4   13.61    3.98
   4  -5  -4    9.08    4.19
   4   5  -4   10.09    3.76
  -4   5   4   13.38    4.02
   4   5  -4   14.40    2.24
   4   5  -4   19.37    6.11
   4   5  -4   20.41    5.53
   3  -5  -4   36.95    6.16
   3  -5  -4   47.89    6.19
   3   5  -4   59.91    7.49
   3   5  -4   44.72    5.03
  -3   5   4   45.51    5.80
   3   5  -4   51.09    4.04
   3   5  -4   45.34    7.04
   2  -5  -4 1484.55   50.11
  -2  -5   4 1491.06   48.11
   2  -5  -4 1448.19   49.46
  -2   5   4 1461.12   49.82
   2   5  -4 1454.54   48.38
   2   5  -4 1495.29   50.62
   2   5  -4 1471.28   48.62
  -1  -5   4  192.87    9.71
   1  -5  -4  217.32   11.60
  -1  -5   4  206.85    7.33
   1  -5  -4  209.01   11.17
   1   5  -4  202.13   11.10
  -1   5   4  194.24   10.57
   0  -5  -4   63.70    7.20
   0  -5  -4   85.12    8.24
   0  -5   4   50.55    5.75
   0   5  -4   67.18    6.66
   0   5   4   71.09    7.53
   1  -5   4  323.40   14.69
  -1  -5  -4  335.87   15.29
  -1   5  -4  322.32   13.72
   1   5   4  333.36   15.08
   1   5   4  308.23   12.64
  -2  -5  -4   35.97    5.65
   2  -5   4   47.47    6.52
   2   5   4   48.93    5.54
  -2   5  -4   52.71    5.00
   2   5   4   39.16    6.28
   3  -5   4  444.85   19.14
  -3  -5  -4  425.47   18.65
   3   5   4  463.01   18.93
  -3   5  -4  413.06   15.69
   3   5   4  416.05   17.74
  -4  -5  -4   59.97    7.35
   4  -5   4   64.94    8.69
  -4   5  -4   55.81    3.75
   4   5   4   63.36    7.52
   4   5   4   56.06    7.32
   5  -5   4   22.44    6.49
  -5  -5  -4   28.54    5.74
   5   5   4   27.22    6.12
   5   5   4   33.26    7.08
   6  -5   4   81.89    9.98
   6   5   4   96.36   10.89
   6   5   4   92.72    9.95
   7  -5   4   14.29    6.65
   7   5   4   10.49    5.92
   7   5   4   21.44    7.51
   8  -5   4   55.71    9.93
   8  -5   4   71.89   12.23
   8   5   4   69.58    9.86
   8   5   4   60.23   11.28
   9  -5   4   57.02   11.95
   9  -5   4   42.46    9.44
   9   5   4   32.71   10.21
   9   5   4   40.06    8.65
  10  -5   4    1.44    7.27
  10  -5   4  -15.41    7.63
  10   5   4   11.93    7.57
  10   5   4    2.90    9.35
  11  -5   4   -1.52    7.75
  11  -5   4    5.05    8.02
  11   5   4   11.65   10.60
  11   5   4   -2.49    7.52
  11  -6  -4   64.33    9.80
  11  -6  -4   62.83   13.79
  11  -6  -4   46.55   12.87
  11   6  -4   35.72   13.01
  10  -6  -4  141.19   12.79
  10  -6  -4  124.67   17.76
  10  -6  -4  120.10   15.92
  10   6  -4  118.54   16.09
   9  -6  -4   13.65    6.45
   9  -6  -4   22.40    9.34
   9  -6  -4   14.53    8.26
   9   6  -4    6.74    6.24
   9   6  -4   18.19    8.21
   9   6  -4   17.08    9.77
   8  -6  -4  119.15   13.07
   8  -6  -4   99.15   10.26
   8  -6  -4   91.77   13.93
   8   6  -4  112.32   11.82
   8   6  -4   84.43   11.42
   8   6  -4   74.32   12.91
   7  -6  -4  284.72   18.36
   7  -6  -4  276.45   16.18
   7  -6  -4  271.55   15.38
   7   6  -4  265.37   17.52
   7   6  -4  254.89   16.21
   7   6  -4  269.89   16.00
   6  -6  -4  121.86   11.08
   6  -6  -4  144.62   10.63
   6  -6  -4  143.42   13.47
   6   6  -4  134.53    6.08
   6   6  -4  136.15   10.38
   6   6  -4  142.84   14.01
   6   6  -4  140.07   12.40
   5  -6  -4   35.32    7.96
   5  -6  -4   36.36    6.39
   5  -6  -4   46.00    6.23
   5   6  -4   37.51    3.61
   5   6  -4   30.85    8.01
   5   6  -4   39.38    3.39
   5   6  -4   36.98    5.81
   5   6  -4   40.27    7.55
   4  -6  -4    6.24    4.58
   4  -6  -4   12.87    6.13
   4   6  -4   11.62    3.62
   4   6  -4   19.85    2.85
   4   6  -4   19.55    5.54
   4   6  -4   20.45    6.56
   4   6  -4   16.80    3.06
  -4   6   4    9.18    4.35
  -3  -6   4  244.43    9.73
   3  -6  -4  207.85   12.81
   3  -6  -4  217.39   12.38
  -3   6   4  221.26   11.85
   3   6  -4  229.15   10.41
   3   6  -4  241.80   13.32
   3   6  -4  242.15   10.12
  -2  -6   4 1564.74   51.35
   2  -6  -4 1579.12   53.51
   2  -6  -4 1534.07   52.69
  -2   6   4 1553.38   53.08
   2   6  -4 1547.55   53.59
   2   6  -4 1578.83   51.03
   1  -6  -4  344.77   15.78
  -1  -6   4  350.55   12.12
  -1  -6   4  342.95   14.40
   1  -6  -4  331.82   15.47
  -1   6   4  349.45   15.58
   1   6  -4  364.87   15.99
   0  -6   4  732.15   27.35
   0  -6  -4  731.34   27.65
   0  -6  -4  794.79   28.88
   0   6  -4  730.52   27.47
   0   6   4  754.17   28.28
   1  -6   4 1121.90   39.57
  -1  -6  -4 1144.31   40.11
   1   6   4 1161.57   40.14
  -1   6  -4 1054.47   38.11
   2  -6   4   27.94    5.56
  -2  -6  -4   38.06    6.53
   2   6   4   16.90    4.79
   2   6   4   30.67    5.10
  -2   6  -4   38.41    4.74
  -3  -6  -4  463.14   20.57
   3  -6   4  485.86   21.26
   3   6   4  494.00   20.16
   3   6   4  503.39   21.02
  -3   6  -4  487.45   17.86
  -4  -6  -4  693.52   26.39
   4  -6   4  641.48   27.15
   4   6   4  610.54   26.32
   4   6   4  678.37   26.46
  -4   6  -4  651.66   22.23
  -5  -6  -4  220.81   13.02
   5  -6   4  231.71   14.43
   5   6   4  201.35   13.61
   5   6   4  251.38   13.62
   6  -6   4   -1.93    5.36
   6   6   4    4.77    5.81
   6   6   4    0.51    4.67
   7  -6   4  167.42   15.15
   7   6   4  165.72   15.45
   7   6   4  171.93   12.64
   8  -6   4   93.55   12.00
   8  -6   4   71.60   12.23
   8   6   4   82.35   10.42
   8   6   4   65.69   11.40
   9  -6   4   21.20    8.86
   9  -6   4   34.20   10.32
   9   6   4   18.16    9.36
   9   6   4   27.43    8.10
  10  -6   4   -5.03    7.95
  10  -6   4   10.55    8.42
  10   6   4    6.51    7.21
  10   6   4   19.72   10.07
  11  -6   4    1.04    9.80
  11  -6   4   19.82    9.26
  11   6   4    4.99    8.64
  11   6   4    4.98    9.58
  11  -7  -4    6.38    9.30
  11  -7  -4    5.07    6.56
  11  -7  -4   -0.42   10.64
  11   7  -4   -4.55    9.77
  10  -7  -4    3.39    6.36
  10  -7  -4    9.94   10.25
  10  -7  -4   17.94    9.98
  10   7  -4    1.10   10.33
   9  -7  -4  106.76   12.26
   9  -7  -4  107.13   15.93
   9  -7  -4  115.88   14.11
   9   7  -4  117.58   13.18
   9   7  -4  122.79   16.22
   8  -7  -4   24.37    7.47
   8  -7  -4   34.98    8.74
   8  -7  -4   18.08    8.89
   8   7  -4   40.82    8.53
   8   7  -4   21.58    7.30
   8   7  -4   21.77    9.69
   7  -7  -4    7.02    5.96
   7  -7  -4    0.03    6.66
   7  -7  -4   -8.60    5.01
   7   7  -4   -0.50    4.60
   7   7  -4   -3.22    7.28
   7   7  -4    3.02    2.06
   7   7  -4   -0.55    5.63
   6  -7  -4    7.36    5.26
   6  -7  -4    3.73    5.31
   6  -7  -4    5.02    6.73
   6   7  -4    5.47    4.16
   6   7  -4    8.46    7.12
   6   7  -4    4.77    5.90
   6   7  -4    7.89    2.52
   5  -7  -4   58.30    7.92
   5  -7  -4   62.07    9.12
   5   7  -4   70.23    9.22
   5   7  -4   71.60    7.44
   5   7  -4   60.82    9.91
  -5   7   4   75.51    8.21
   5   7  -4   70.71    4.81
   5   7  -4   67.94    5.39
   4  -7  -4  175.29   12.42
   4  -7  -4  157.14   11.04
   4   7  -4  178.39    8.19
   4   7  -4  161.71    9.12
   4   7  -4  164.06    8.41
   4   7  -4  144.58   11.34
   4   7  -4  147.52   11.57
  -4   7   4  159.56   10.70
   3  -7  -4   -2.38    3.79
  -3  -7   4    4.84    2.69
   3  -7  -4    4.52    4.29
   3   7  -4    6.82    3.27
   3   7  -4    1.35    2.40
   3   7  -4    4.22    4.64
   3   7  -4    6.23    2.66
  -3   7   4   -1.93    3.83
  -2  -7   4  155.24    8.27
   2  -7  -4  139.50   10.06
   2  -7  -4  147.82    9.96
  -2   7   4  132.36    9.94
   2   7  -4  150.31   10.75
   2   7  -4  157.81    6.62
  -1  -7   4  803.82   25.99
   1  -7  -4  802.29   29.91
  -1  -7   4  811.11   28.77
   1  -7  -4  774.42   30.07
  -1   7   4  802.91   30.10
   1   7  -4  775.49   25.80
   0  -7  -4   26.65    5.61
   0  -7   4   40.33    5.83
   0  -7  -4   42.61    6.49
   0   7   4   39.99    6.71
   1  -7   4  173.12   10.65
   1   7   4  157.12   10.90
   2  -7   4    5.87    4.58
  -2  -7  -4   -4.74    4.41
   2   7   4    2.41    3.97
   2   7   4    1.94    3.83
  -2   7  -4   -0.76    3.07
   3  -7   4   18.69    5.77
  -3  -7  -4   16.27    5.23
   3   7   4   13.02    4.72
  -3   7  -4   15.66    3.61
   3   7   4   14.68    5.16
   4  -7   4   27.05    6.78
  -4  -7  -4   13.44    5.28
   4   7   4   17.14    5.49
   4   7   4   29.53    6.67
  -4   7  -4   17.68    3.35
  -5  -7  -4   27.43    6.33
   5  -7   4   25.16    6.56
   5   7   4   25.67    7.27
   5   7   4   21.75    6.16
   6  -7   4   91.15   10.73
   6   7   4  132.15   13.13
   6   7   4  106.08   10.99
   7  -7   4   31.95    8.07
   7   7   4   30.60    8.73
   7   7   4   23.56    7.16
   8  -7   4   56.03   10.72
   8   7   4   25.73    8.84
   8   7   4   34.26    8.41
   9  -7   4   23.53    8.67
   9  -7   4   10.31    8.99
   9   7   4   12.86    9.42
   9   7   4   14.44    7.65
  10  -7   4   28.42    9.40
  10  -7   4   29.71   11.29
  10   7   4   27.65   11.30
  10   7   4   37.99    9.40
  11  -7   4   17.05   11.30
  11  -7   4    2.45    7.95
  11   7   4   15.75    8.92
  11   7   4   29.76   11.94
  11  -8  -4   -0.48    8.95
  11  -8  -4   19.83   10.81
  11  -8  -4    5.71    7.03
  11   8  -4    8.36   11.49
  10  -8  -4   19.81    9.14
  10  -8  -4   11.95   10.98
  10  -8  -4  -12.08    6.57
  10   8  -4   13.99   10.40
   9  -8  -4    2.55    7.10
   9  -8  -4  -11.28    7.05
   9  -8  -4   -7.03    6.94
   9   8  -4    5.46    8.88
   9   8  -4   10.18    6.88
   8  -8  -4   45.94    9.23
   8  -8  -4   47.92   11.47
   8  -8  -4   58.65   10.31
   8   8  -4   50.46    9.99
   8   8  -4   53.78   12.09
   7  -8  -4    2.96    5.76
   7  -8  -4    9.56    5.96
   7  -8  -4    5.28    6.81
   7   8  -4    5.22    2.62
   7   8  -4   19.43    7.31
   7   8  -4   17.62    5.40
   7   8  -4    3.54    8.02
   6  -8  -4   12.03    6.26
   6  -8  -4    9.92    5.34
   6  -8  -4   13.89    7.63
   6   8  -4   18.70    3.52
   6   8  -4   29.26    8.71
   6   8  -4   13.54    4.81
   6   8  -4   15.42    7.15
   5  -8  -4    0.83    5.61
   5  -8  -4    5.86    4.81
   5   8  -4   -4.49    4.99
   5   8  -4    0.05    2.81
  -5   8   4    8.58    4.83
   5   8  -4   -1.38    3.02
   5   8  -4    2.41    6.38
   4  -8  -4    4.48    4.86
   4  -8  -4   -7.91    4.00
   4   8  -4    2.06    4.82
   4   8  -4    1.43    2.65
  -4   8   4    4.38    4.51
   4   8  -4   -1.71    3.08
   3  -8  -4   35.81    6.79
   3  -8  -4   27.03    6.50
   3  -8  -4   29.45    6.40
  -3  -8   4   31.34    4.36
   3   8  -4   17.09    6.00
  -3   8   4   25.29    5.82
   3   8  -4   28.56    4.83
   3   8  -4   34.21    3.81
  -2  -8   4   29.70    4.71
   2  -8  -4   23.45    6.37
   2  -8  -4   20.07    6.11
   2   8  -4   31.21    2.61
  -2   8   4   42.00    6.80
   1  -8  -4  208.93   12.48
   1  -8  -4  190.24   12.03
  -1  -8   4  195.96   10.70
  -1  -8   4  209.86    8.77
  -1   8   4  200.97   12.20
   0  -8  -4   30.95    5.81
   0  -8   4   33.51    5.66
   0  -8   4   61.95    4.87
   0  -8  -4   56.12    7.82
   0   8   4   41.67    6.64
   1  -8   4    7.37    4.61
  -1  -8  -4   28.74    6.24
   1   8   4   27.41    6.34
  -2  -8  -4   75.11    8.89
   2  -8   4   66.96    8.56
   2   8   4   61.80    8.32
   2   8   4   63.22    6.97
   3  -8   4   -0.42    4.84
  -3  -8  -4    5.45    4.48
   3   8   4    3.94    4.51
  -3   8  -4   -3.42    2.74
   3   8   4   -5.03    4.00
  -4  -8  -4    9.04    5.21
   4  -8   4   26.02    6.92
   4   8   4   20.93    5.91
   4   8   4   14.73    5.97
  -4   8  -4   18.98    3.74
   5  -8   4   67.84    9.70
  -5  -8  -4   91.79    9.76
   5   8   4   94.76   10.98
   5   8   4   70.93    9.46
   6  -8   4   -1.45    5.87
   6   8   4   12.95    6.08
   6   8   4   -2.71    6.37
   7  -8   4    0.38    6.34
   7   8   4    0.64    6.76
   7   8   4    8.74    6.29
   8  -8   4   42.69    9.89
   8   8   4   33.50   10.26
   8   8   4   42.14    8.51
   9  -8   4  -12.34    6.45
   9  -8   4    7.47    7.54
   9   8   4   20.55    7.98
   9   8   4   14.24    9.69
  10  -8   4    2.30    7.54
  10  -8   4    3.84    9.56
  10   8   4    3.24    7.71
  10   8   4   -2.75    9.03
  11  -9  -4   -6.75    8.53
  11  -9  -4   34.34   12.85
  11   9  -4   -7.19    9.72
  10  -9  -4   13.96    8.86
  10  -9  -4   18.68   10.17
  10  -9  -4    2.27    8.69
  10   9  -4   -2.93    5.67
  10   9  -4   21.32   11.76
   9  -9  -4   22.27    9.55
   9  -9  -4   41.13   11.28
   9  -9  -4   56.86   10.66
   9   9  -4   40.46    9.85
   9   9  -4   37.12   12.32
   8  -9  -4   68.17   10.69
   8  -9  -4   61.45   10.49
   8  -9  -4   42.75   12.02
   8   9  -4   68.29   12.18
   8   9  -4   72.78   11.40
   7  -9  -4    5.67    5.77
   7  -9  -4   13.29    6.79
   7  -9  -4    3.13    6.94
   7   9  -4   12.89    3.46
   7   9  -4    1.58    8.44
   7   9  -4    4.04    6.86
   6  -9  -4   13.46    6.52
   6  -9  -4   17.88    8.10
   6   9  -4   11.54    7.65
   6   9  -4   18.22    3.98
   6   9  -4   15.80    7.51
   5  -9  -4  311.38   17.15
   5  -9  -4  341.34   18.85
   5   9  -4  314.32   18.21
   5   9  -4  317.94   14.09
  -5   9   4  315.84   16.81
   4  -9  -4  429.07   20.63
   4  -9  -4  420.68   20.95
   4   9  -4  464.15   21.93
   4   9  -4  437.41   18.19
  -4   9   4  450.13   20.60
  -3  -9   4    1.69    3.15
   3  -9  -4    8.64    5.30
   3  -9  -4   -0.97    4.87
   3  -9  -4   14.50    5.55
  -3   9   4   -0.33    4.42
   3   9  -4   11.26    4.19
   2  -9  -4  225.79   12.90
   2  -9  -4  239.95   14.33
  -2  -9   4  231.14   11.71
   2  -9  -4  222.78   13.94
  -2   9   4  244.94   13.58
   2   9  -4  221.97   12.16
  -1  -9   4  256.32   13.08
  -1  -9   4  256.99   10.97
   1  -9  -4  261.75   15.08
   1  -9  -4  276.46   14.88
  -1   9   4  271.42   15.02
   0  -9  -4  100.71    9.70
   0  -9   4  135.63    7.44
   0  -9   4  137.61    9.73
   0  -9  -4  164.53   11.49
   0   9   4  140.68   11.77
   1  -9   4   64.44    7.80
  -1  -9  -4  110.87   10.55
   1   9   4   75.02    8.89
  -2  -9  -4  322.06   16.83
   2  -9   4  330.36   17.06
   2   9   4  352.43   17.55
   3  -9   4  346.00   18.28
  -3  -9  -4  344.79   18.25
   3   9   4  391.20   17.74
   3   9   4  379.93   18.61
  -4  -9  -4   -0.27    4.94
   4  -9   4    3.07    5.42
   4   9   4   -5.82    4.81
  -4   9  -4    6.81    3.31
   4   9   4   -2.00    4.70
   5  -9   4   54.79    8.94
  -5  -9  -4   58.13    8.71
   5   9   4   61.78    8.84
   5   9   4   62.36    9.67
   6  -9   4  147.96   14.43
   6   9   4  191.21   16.25
   6   9   4  191.79   13.57
   7  -9   4  167.30   16.18
   7   9   4  164.44   14.91
   7   9   4  145.19   15.76
   8  -9   4    3.54    7.04
   8   9   4   -2.16    7.96
   8   9   4   -4.14    6.33
   9  -9   4   16.15    8.47
   9  -9   4   19.60    9.34
   9   9   4   16.14    9.45
   9   9   4   18.74    8.80
  10  -9   4   44.27   11.85
  10  -9   4   53.17   12.56
  10   9   4   41.71   10.53
  10   9   4   59.79   13.83
  10 -10  -4   16.63   10.67
  10 -10  -4    6.46    8.83
  10 -10  -4   16.09    9.16
  10  10  -4   21.71   12.06
  10  10  -4   24.39    8.80
   9 -10  -4   -0.99    7.19
   9 -10  -4    6.05    7.49
   9 -10  -4    5.60    8.80
   9  10  -4   13.24    9.07
   9  10  -4   -2.54    7.49
   8 -10  -4    3.93    6.93
   8 -10  -4   -1.81    6.46
   8 -10  -4    7.56    8.66
   8  10  -4    7.25    7.49
   8  10  -4  -12.99    8.48
   7 -10  -4   67.47   12.22
   7 -10  -4   60.59    9.58
   7 -10  -4   83.13   11.50
   7  10  -4   68.30   12.76
   7  10  -4   84.06    7.17
   7  10  -4   58.41   11.06
   6 -10  -4   25.46    7.74
   6 -10  -4   29.28    8.10
   6  10  -4   42.52    9.01
   6  10  -4   41.43    5.73
   6  10  -4   33.79    8.89
   5 -10  -4    4.35    6.78
   5 -10  -4   23.16    7.09
  -5  10   4   14.91    6.19
   5  10  -4   19.08    4.74
   5  10  -4   17.48    7.07
   4 -10  -4   86.42   10.26
   4 -10  -4   64.56    9.26
  -4  10   4   72.60    9.40
   4  10  -4   64.36    7.45
   3 -10  -4  613.31   25.75
   3 -10  -4  586.82   26.55
   3 -10  -4  600.43   26.36
  -3  10   4  571.91   25.44
   3  10  -4  619.43   24.12
   2 -10  -4   48.53    7.23
  -2 -10   4   39.77    5.90
   2 -10  -4   47.10    8.32
   2 -10  -4   48.96    7.94
   2  10  -4   41.21    6.47
  -2  10   4   49.76    8.07
  -1 -10   4    8.21    4.28
   1 -10  -4    2.78    5.04
   1 -10  -4    3.81    4.90
  -1 -10   4    9.18    3.25
  -1  10   4    7.87    5.62
   0 -10  -4   62.65    8.63
   0 -10  -4   74.42    8.57
   0 -10   4   82.28    6.67
   0 -10   4   77.35    8.79
   0  10   4   88.94    9.90
  -1 -10  -4  641.40   25.87
   1 -10   4  523.07   24.02
  -1 -10  -4  584.09   24.91
   1  10   4  583.14   25.08
   2 -10   4  146.74   11.11
  -2 -10  -4  153.79   11.85
   2  10   4  165.63   12.33
  -3 -10  -4  108.22   11.13
   3 -10   4   78.22    9.99
   3  10   4   99.94   10.53
   3  10   4   96.04    9.80
  -4 -10  -4  264.24   15.50
   4 -10   4  238.69   15.36
   4  10   4  244.97   15.08
   4  10   4  221.74   14.70
   5 -10   4    6.24    6.44
   5  10   4    9.92    5.86
   5  10   4   -2.98    5.67
   6 -10   4   -1.03    6.34
   6  10   4    1.91    6.56
   6  10   4    1.56    5.66
   7 -10   4    4.09    7.02
   7  10   4    2.86    7.74
   7  10   4    0.83    6.05
   8 -10   4   83.43   12.83
   8  10   4   86.61   11.96
   8  10   4   94.77   14.21
   9 -10   4    9.40    8.37
   9  10   4   -9.32    8.38
   9  10   4   -2.87    7.09
  10 -10   4   12.09    9.48
  10 -10   4    9.02    9.06
  10  10   4    6.54    8.17
  10  10   4   -4.92    9.70
  10 -11  -4   -4.30    8.32
  10 -11  -4    0.58   10.05
  10 -11  -4    7.96    9.12
  10  11  -4   16.78    9.05
  10  11  -4  -18.81    8.30
   9 -11  -4   -5.37    7.52
   9 -11  -4   -4.00    9.54
   9 -11  -4    5.10    7.97
   9  11  -4   -3.22    8.80
   9  11  -4    1.36    7.95
   8 -11  -4   41.61   10.56
   8 -11  -4   50.50   10.70
   8 -11  -4   49.13   10.20
   8  11  -4   37.82   10.44
   8  11  -4   34.35    5.20
   8  11  -4   44.95   10.75
   7 -11  -4  -11.58    6.16
   7 -11  -4    9.18    6.99
   7  11  -4   -3.78    3.13
   7  11  -4  -12.24    6.75
   7  11  -4   -4.32    7.00
   6 -11  -4   12.35    6.68
   6 -11  -4    3.24    6.55
   6  11  -4    9.81    7.07
   6  11  -4    7.02    4.07
   5 -11  -4   50.40    9.62
   5 -11  -4   33.42    8.16
   5  11  -4   48.87    6.72
  -5  11   4   52.11   10.00
   5  11  -4   53.08    9.75
   4 -11  -4   18.13    6.73
   4 -11  -4   38.76    7.76
  -4  11   4   25.40    6.82
   4  11  -4   31.45    6.05
   3 -11  -4   -1.17    4.91
   3 -11  -4   -2.49    5.97
   3 -11  -4   -4.04    5.90
  -3  11   4    5.29    5.20
   3  11  -4   -0.71    4.18
  -2 -11   4   -1.04    3.70
   2 -11  -4    8.22    4.86
   2 -11  -4    3.97    5.45
   2 -11  -4    3.41    5.69
  -2 -11   4   -1.26    3.03
  -2  11   4    1.33    5.15
   2  11  -4    6.68    4.72
   1 -11  -4   26.14    6.83
   1 -11  -4   11.34    5.90
  -1 -11   4   20.60    4.16
  -1 -11   4   17.47    5.39
  -1  11   4   16.31    6.00
   0 -11   4    0.03    3.12
   0 -11  -4   12.59    5.30
   0 -11  -4    7.57    5.50
   0 -11   4    8.62    5.02
   0  11   4   -1.25    4.58
   1 -11   4   14.67    5.88
  -1 -11  -4    6.54    5.37
  -1 -11  -4   -5.17    5.22
   1  11   4   11.42    6.13
   2 -11   4    2.35    5.34
  -2 -11  -4   -4.00    4.34
   2  11   4   -6.61    4.83
   3 -11   4    7.32    6.04
  -3 -11  -4    4.65    5.23
   3  11   4    8.62    6.24
  -4 -11  -4   67.53    9.50
   4 -11   4   59.24   10.25
   4  11   4   57.09    9.09
   4  11   4   48.44    8.60
   5 -11   4    9.49    7.03
   5  11   4   -0.27    6.74
   5  11   4    5.35    5.63
   6 -11   4   -2.16    6.29
   6  11   4    6.33    6.09
   6  11   4   -4.39    6.93
   7 -11   4   -7.82    6.13
   7  11   4    3.28    6.38
   7  11   4   -1.63    8.23
   8 -11   4    1.04    6.97
   8  11   4  -11.33    7.45
   8  11   4   -6.80    6.59
   9 -11   4   -2.17    7.99
   9  11   4   28.75   11.13
   9  11   4   -1.55    7.60
  10 -11   4    9.12    9.54
  10 -11   4   16.60    9.94
  10  11   4   18.72    9.29
  10  11   4    5.67   10.36
  10 -12  -4   18.71    9.98
  10 -12  -4   -1.30    9.03
  10 -12  -4   11.22   10.13
  10  12  -4    8.98    9.16
  10  12  -4   14.40   11.20
   9 -12  -4    6.53    9.64
   9 -12  -4   -8.31    7.98
   9 -12  -4    6.83    8.34
   9  12  -4    5.04    9.90
   9  12  -4   14.18    9.02
   8 -12  -4    6.03    7.99
   8 -12  -4   -0.97    7.01
   8 -12  -4   15.05    7.88
   8  12  -4    2.83    3.93
   8  12  -4   12.35    8.88
   7 -12  -4   66.60   11.86
   7 -12  -4  110.83   13.78
   7  12  -4   89.66    8.63
   7  12  -4   94.88   14.10
   6 -12  -4  104.92   13.24
   6 -12  -4   99.84   12.73
   6  12  -4   93.48   12.82
   6  12  -4  118.46    9.11
   5 -12  -4    4.71    6.25
   5 -12  -4    7.03    7.20
   5  12  -4    0.16    6.33
   5  12  -4    5.78    4.61
   4 -12  -4   86.60   11.22
   4 -12  -4   99.46   11.43
  -4  12   4  114.76   12.24
   4  12  -4  103.96    9.92
   3 -12  -4   90.56   11.79
   3 -12  -4  100.53   12.10
   3 -12  -4  111.85   11.27
  -3  12   4   84.02   10.80
   3  12  -4   81.27    9.35
  -2 -12   4  117.88   10.37
   2 -12  -4  118.55   12.59
   2 -12  -4  125.60   11.07
   2 -12  -4   96.68   11.09
  -2 -12   4  108.65    8.28
  -2  12   4  126.81   12.85
   2  12  -4  113.95   11.15
  -1 -12   4   -4.83    4.17
  -1 -12   4    0.30    3.32
   1 -12  -4   -0.17    5.58
   1 -12  -4    2.20    5.24
  -1  12   4    1.89    5.34
   0 -12   4  200.08   10.63
   0 -12  -4  190.39   13.21
   0 -12  -4  210.60   14.81
   0 -12   4  184.02   12.94
   0  12   4  196.43   14.40
  -1 -12  -4  221.17   15.24
   1 -12   4  192.65   13.36
  -1 -12  -4  223.44   14.45
   1  12   4  227.66   15.29
   2 -12   4   78.83   10.04
  -2 -12  -4   82.21   10.65
   2  12   4   71.29    9.71
  -3 -12  -4   28.72    7.33
   3 -12   4   32.60    8.10
   3  12   4   44.70    8.66
  -4 -12  -4  158.91   14.70
   4 -12   4  138.44   14.56
   4  12   4  155.33   14.62
   5 -12   4  136.77   15.23
   5  12   4  118.08   13.24
   5  12   4  117.98   12.75
   6 -12   4    1.05    6.96
   6  12   4    9.08    7.89
   6  12   4    2.91    6.52
   7 -12   4   13.54    8.43
   7  12   4   26.41    9.96
   7  12   4   23.15    8.18
   8 -12   4   46.79   11.45
   8  12   4   45.15   10.45
   8  12   4   30.83   11.42
   9 -12   4   27.46   10.77
   9  12   4   60.74   13.58
   9  12   4   33.85   10.51
   9 -13  -4   19.07    9.80
   9 -13  -4   14.92   10.67
   9 -13  -4   34.14   10.20
   9  13  -4   37.76   11.14
   8 -13  -4   29.66    9.07
   8 -13  -4   32.70    9.95
   8 -13  -4   35.99   10.78
   8  13  -4   37.14    6.13
   8  13  -4   12.90    9.67
   7 -13  -4   20.63    9.42
   7 -13  -4    8.82    8.08
   7  13  -4    3.04    8.17
   7  13  -4    5.69    4.70
   6 -13  -4   40.93   10.10
   6 -13  -4   61.51   11.56
   6  13  -4   50.75    7.66
   6  13  -4   47.13   10.96
   5 -13  -4  127.60   13.62
   5 -13  -4  103.56   13.53
   5  13  -4  141.01   11.99
   4 -13  -4   16.46    8.11
   4 -13  -4   11.31    6.65
  -4  13   4   20.51    7.98
   4  13  -4   21.56    6.16
   3 -13  -4    2.58    5.59
   3 -13  -4    5.28    6.63
   3 -13  -4   17.98    8.02
   3  13  -4    6.48    5.07
  -3  13   4    7.12    6.40
   2 -13  -4    3.99    5.17
   2 -13  -4    7.54    6.36
  -2 -13   4   12.61    4.32
   2 -13  -4   14.19    7.39
  -2  13   4    1.76    5.89
   2  13  -4    6.37    5.56
  -1 -13   4  183.12   10.59
  -1 -13   4  177.44   12.98
   1 -13  -4  182.88   13.48
   1 -13  -4  182.00   14.00
  -1  13   4  171.67   13.74
   0 -13   4   40.16    5.86
   0 -13  -4   28.66    8.20
   0 -13  -4   38.38    7.54
   0 -13   4   32.39    7.07
   0  13   4   41.84    8.20
  -1 -13  -4   66.70    9.83
  -1 -13  -4   78.95   10.49
   1 -13   4   50.58    8.32
   1  13   4   48.19    8.78
  -2 -13  -4  297.02   18.12
   2 -13   4  322.80   18.48
   2  13   4  267.12   17.22
  -3 -13  -4  113.32   12.71
   3 -13   4  100.32   11.83
   3  13   4   70.30   10.22
   4 -13   4    1.51    7.12
   4  13   4   12.77    7.19
   5 -13   4   13.78    8.33
   5  13   4   12.10    7.49
   6 -13   4   70.41   12.57
   6  13   4   75.75   11.52
   6  13   4   73.20   12.53
   7 -13   4   13.80    8.22
   7  13   4    3.87    8.96
   7  13   4   21.44    8.40
   8 -13   4    9.23    9.39
   8  13   4    9.08    7.99
   8  13   4    0.41    9.61
   9 -13   4    4.25    9.74
   9  13   4   11.22    9.06
   9  13   4    3.61    9.86
   9 -14  -4   12.47    9.21
   9 -14  -4    2.91    9.41
   9 -14  -4   25.00   11.91
   9  14  -4   16.21   10.32
   8 -14  -4    1.28    8.87
   8 -14  -4    3.24    7.90
   8  14  -4    7.35    4.90
   8  14  -4    7.85    9.30
   7 -14  -4   23.35    9.52
   7 -14  -4    7.91    7.62
   7  14  -4    7.09    8.10
   7  14  -4    7.10    5.12
   6 -14  -4   26.24    9.52
   6 -14  -4   26.62    9.19
   6  14  -4   12.21    5.98
   6  14  -4   13.40    8.23
   5 -14  -4   -4.01    6.51
   5 -14  -4   -0.99    7.08
   5  14  -4   -3.72    4.99
   4 -14  -4    9.77    6.93
   4 -14  -4    3.01    7.11
  -4  14   4    9.66    6.65
   4  14  -4    3.16    5.58
  -3 -14   4    5.37    4.89
   3 -14  -4    2.66    5.89
   3 -14  -4    0.44    6.75
   3 -14  -4    4.38    7.44
   3  14  -4   14.20    6.25
  -3  14   4   -0.07    6.08
   2 -14  -4    0.52    5.94
   2 -14  -4   17.48    6.13
  -2 -14   4   13.22    4.84
   2 -14  -4   10.31    6.47
  -2  14   4    8.47    6.39
   2  14  -4    4.29    5.65
   1 -14  -4    2.11    5.32
  -1 -14   4   10.77    4.58
  -1 -14   4    3.96    5.59
   1 -14  -4   -1.66    6.42
  -1  14   4   11.10    6.96
   0 -14  -4   18.11    6.77
   0 -14  -4   26.02    8.47
   0 -14   4    7.67    6.33
   0 -14   4    8.14    4.53
   0  14   4   13.73    7.65
  -1 -14  -4   30.42    8.37
   1 -14   4   43.44    9.02
  -1 -14  -4   36.86    8.55
   1  14   4   28.84    7.80
   2 -14   4   22.29    8.02
  -2 -14  -4   19.41    7.16
  -2 -14  -4    8.32    7.11
   2  14   4   21.09    7.82
   3 -14   4    6.46    6.75
  -3 -14  -4   14.58    7.59
   3  14   4    2.67    6.19
   4 -14   4   13.56    7.75
   4  14   4   -3.68    5.42
   5 -14   4    4.52    7.48
   5  14   4   -1.11    6.41
   6 -14   4   -4.21    7.47
   6  14   4   -0.65    6.98
   7 -14   4   -6.04    8.12
   7  14   4    8.19    9.73
   7  14   4   11.55    8.43
   8 -14   4   14.75    9.68
   8  14   4   -7.10    8.98
   8  14   4   -0.25    7.89
   9 -14   4    2.84    9.35
   9  14   4  -12.78    9.45
   9  14   4   -3.58    8.25
   8 -15  -4   80.39   14.51
   8 -15  -4   70.41   13.25
   8  15  -4   80.01    9.18
   8  15  -4   62.53   13.62
   7 -15  -4    7.66    8.30
   7 -15  -4   -0.08    8.31
   7  15  -4    6.00    8.50
   7  15  -4    2.31    5.27
   6 -15  -4   28.87    9.62
   6 -15  -4   43.20   10.92
   6  15  -4   24.86    7.18
   6  15  -4   25.05    9.84
   5 -15  -4   75.90   12.29
   5 -15  -4   85.43   12.31
   5  15  -4   82.34   10.35
   4 -15  -4  100.21   12.59
   4 -15  -4   75.36   11.53
   4  15  -4   96.22   11.37
  -4  15   4   97.40   13.18
   3 -15  -4   19.32    7.70
   3 -15  -4   31.44    9.67
   3 -15  -4   10.57    8.07
   3  15  -4   40.20    8.28
  -3  15   4   16.43    7.26
   2 -15  -4   75.62   12.53
   2 -15  -4   98.37   10.84
   2 -15  -4  103.41   13.42
  -2  15   4   75.81   11.50
   2  15  -4  100.37   11.53
   1 -15  -4  249.43   17.38
  -1 -15   4  248.54   14.25
   1 -15  -4  285.66   18.95
   1 -15  -4  257.58   15.28
  -1  15   4  286.90   19.08
   0 -15  -4   81.91   11.05
   0 -15  -4   67.97   10.76
   0 -15   4  100.81   12.05
   0 -15   4   93.02    9.49
   0  15   4   92.89   12.70
  -1 -15  -4  134.29   13.92
   1 -15   4  103.10   12.25
  -1 -15  -4  136.60   14.49
   1  15   4   92.53   12.26
  -2 -15  -4  366.32   21.13
  -2 -15  -4  399.73   22.21
   2 -15   4  367.49   21.82
   2  15   4  385.35   21.95
   3 -15   4   64.29   11.04
  -3 -15  -4   68.68   11.67
   3  15   4   75.90   11.29
   4 -15   4    2.88    8.20
   4  15   4    2.09    6.46
   5 -15   4   78.01   13.50
   5  15   4   64.70   11.20
   6 -15   4  103.90   15.35
   6  15   4   84.34   12.35
   7 -15   4    1.05    8.15
   7  15   4    8.70    8.10
   8 -15   4   18.77    9.97
   8  15   4    2.59    9.86
   8  15   4   11.28    9.05
   8 -16  -4   17.73   10.90
   8 -16  -4   30.65   10.33
   8  16  -4   18.22    6.56
   8  16  -4   22.33   10.90
   7 -16  -4   15.82   10.48
   7 -16  -4   20.74    9.70
   7  16  -4   -7.47    7.58
   7  16  -4   -2.03    5.38
   6 -16  -4   14.38    8.56
   6 -16  -4   19.73    9.65
   6  16  -4   21.09   10.34
   6  16  -4   12.41    7.13
   5 -16  -4  -15.87    5.89
   5 -16  -4    2.96    7.78
   5  16  -4    1.25    5.96
   4 -16  -4   53.99   12.11
   4 -16  -4   73.44   11.42
  -4  16   4   69.39   12.02
   4  16  -4   75.07   10.31
   3 -16  -4   85.39   11.07
   3 -16  -4   69.21   11.67
   3 -16  -4   59.66   12.14
   3  16  -4   67.69   10.29
  -3  16   4   98.25   13.83
   2 -16  -4   -2.81    6.81
   2 -16  -4    1.83    6.69
  -2  16   4   -3.21    6.04
   2  16  -4    9.66    6.47
   1 -16  -4   12.26    7.88
   1 -16  -4    9.33    7.32
  -1  16   4    7.66    7.12
   0 -16  -4   58.24   10.60
   0 -16  -4  111.35   13.77
   0 -16   4   98.80   12.27
   0  16   4  108.32   13.63
  -1 -16  -4   30.87    8.48
  -1 -16  -4   43.37    9.55
   1 -16   4   57.20   10.23
   1  16   4   62.91   12.11
  -2 -16  -4   34.21    8.60
   2 -16   4   35.03    9.17
  -2 -16  -4   33.95    9.12
   2  16   4   31.92    8.76
   3 -16   4   26.82    8.72
  -3 -16  -4   17.10    7.90
   3  16   4   19.54    8.43
   4 -16   4   21.14    8.61
   4  16   4    9.26    7.58
   5 -16   4  131.87   17.36
   5  16   4  103.24   13.79
   6 -16   4   30.90   10.63
   6  16   4   26.81   10.03
   7 -16   4    3.25    8.47
   7  16   4    4.57    8.28
   8 -16   4   29.28   11.75
   8  16   4   43.46   11.67
   7 -17  -4    7.94    9.58
   7 -17  -4   12.97    9.78
   7  17  -4   11.89    9.03
   7  17  -4   19.68    7.53
   6 -17  -4    5.23    8.67
   6 -17  -4    4.38    9.26
   6  17  -4   10.57    8.92
   6  17  -4   16.34    7.50
   5 -17  -4    9.22    8.92
   5  17  -4   -0.89    6.47
   4 -17  -4    9.21    9.03
   4  17  -4   16.18    7.84
  -4  17   4    3.19    8.04
   3 -17  -4    4.39    7.80
   3 -17  -4   -4.40    7.08
  -3  17   4    2.11    7.92
   3  17  -4    6.26    6.61
   2 -17  -4   -6.58    6.62
   2 -17  -4    5.02    8.24
  -2  17   4   -8.97    7.27
   2  17  -4   -4.15    5.91
   1 -17  -4   13.94    8.06
   1 -17  -4   13.95    7.87
  -1  17   4   -2.68    7.65
   0 -17  -4   12.47    7.95
   0 -17  -4    6.01    7.99
   0  17   4   10.95    8.18
  -1 -17  -4    0.78    7.70
   1 -17   4    4.45    7.45
  -1 -17  -4   16.12    8.02
   1  17   4   18.97    8.46
  -2 -17  -4   22.31    8.71
  -2 -17  -4    5.31    7.63
   2 -17   4   11.82    8.12
   2  17   4   11.60    8.01
  -3 -17  -4    7.47    7.54
   3 -17   4    4.09    7.70
   3  17   4   -4.89    6.82
   4 -17   4    6.40    8.20
   4  17   4    8.29    7.60
   5 -17   4   10.59    9.40
   5  17   4   20.37    9.29
   6 -17   4   10.14    8.67
   6  17   4   -2.73    7.65
   7 -17   4   -6.52    8.28
   7  17   4   -6.68    7.56
   7 -18  -4   26.00   11.33
   7  18  -4   22.82    8.03
   7  18  -4   43.72   12.13
   6 -18  -4    8.02    9.11
   6  18  -4   12.90    9.11
   6  18  -4   16.19    7.69
   5 -18  -4    1.75    8.32
   5  18  -4   -9.00    6.20
   4 -18  -4   50.61   12.21
   4  18  -4   68.10   11.28
  -4  18   4   61.99   12.20
   3 -18  -4  115.63   15.35
   3 -18  -4  160.41   17.66
   3  18  -4  161.47   15.94
  -3  18   4  138.76   16.41
   2 -18  -4   34.52   11.00
   2 -18  -4   27.16    9.97
  -2  18   4   30.82   10.55
   1 -18  -4    4.97    8.66
   1 -18  -4   23.73    8.90
  -1  18   4    6.38    8.12
   0 -18  -4   62.11   11.35
   0 -18  -4   66.93   12.62
   0  18   4   74.75   13.79
   1 -18   4   79.12   13.18
  -1 -18  -4   94.25   13.58
  -1 -18  -4   60.25   11.37
   1  18   4   77.94   12.79
   2 -18   4    9.23    8.04
  -2 -18  -4    2.35    7.72
   2  18   4    1.36    7.60
   3 -18   4    7.51    7.92
  -3 -18  -4   -2.85    6.99
   3  18   4    6.50    8.03
   4 -18   4   79.27   13.45
  -4 -18  -4   59.05   11.80
   4  18   4   73.70   13.03
   5 -18   4    0.28    8.82
   5  18   4   15.31    8.68
   6 -18   4   -8.62    7.94
   6  18   4    2.85    8.09
   6 -19  -4   26.93   11.14
   6  19  -4   36.88   10.12
   6  19  -4   36.73   12.00
   5 -19  -4   17.88    9.99
   5  19  -4   24.96    9.38
   4 -19  -4   15.71   10.13
   4  19  -4   33.03    9.59
   3 -19  -4    7.49    8.46
  -3  19   4    4.67    9.15
   3  19  -4   -2.09    6.33
   2 -19  -4   62.94   12.43
   2 -19  -4   63.23   12.90
  -2  19   4   79.97   14.91
   1 -19  -4  152.84   16.79
   1 -19  -4   82.24   13.88
  -1  19   4  135.87   16.83
   0 -19  -4    6.15    7.86
   0 -19  -4    5.12    8.60
   0  19   4    9.78    8.85
  -1 -19  -4    1.59    7.55
  -1 -19  -4    4.43    8.24
   1  19   4   -3.26    7.73
  -2 -19  -4   39.11   11.00
   2 -19   4   53.62   12.23
   2  19   4   49.25   11.30
   3 -19   4   99.52   15.76
  -3 -19  -4   91.28   14.35
   3  19   4   84.47   13.56
   4 -19   4    8.84    9.33
  -4 -19  -4    3.28    8.36
   4  19   4   -9.20    7.56
   5 -19   4   28.02   11.34
   5  19   4    3.15    8.56
   6 -19   4   59.68   14.59
   6  19   4   49.05   12.40
   5 -20  -4    6.43    9.28
   5  20  -4   10.39    7.78
   4 -20  -4   -6.27    8.94
   4  20  -4   12.72    8.23
   3 -20  -4   -9.61    8.53
  -3  20   4   -2.14    7.14
   2 -20  -4    7.64    8.66
   2 -20  -4   10.51    9.14
  -2  20   4    9.48    9.07
   1 -20  -4   -7.38    8.55
   1 -20  -4    1.12    8.06
  -1  20   4   -5.53    8.17
   0 -20  -4   -1.66    8.11
   0 -20  -4   -6.92    7.51
   0  20   4    3.36    8.02
  -1 -20  -4    4.70    8.10
   1  20   4    3.69    8.22
  -2 -20  -4   -3.40    7.73
   2  20   4    5.90    8.46
   3 -20   4    7.00    9.34
  -3 -20  -4    7.59    8.38
   3  20   4    5.98    8.84
   4 -20   4    6.96   10.37
  -4 -20  -4   26.52   10.52
   4  20   4   -0.67    7.96
   5 -20   4    3.00    9.80
  -5 -20  -4   -8.33    7.96
   5  20   4    9.85    9.52
   4 -21  -4    4.53   10.34
   3 -21  -4   13.41   10.82
  -3  21   4    2.38    9.38
   2 -21  -4   37.80   11.64
   2 -21  -4   37.97   12.02
  -2  21   4   29.13   12.00
   1 -21  -4   32.28   11.33
   1 -21  -4   24.42   10.77
  -1  21   4   29.87   11.70
   0 -21  -4   -3.63    8.68
   0 -21  -4   -2.99    8.69
   0  21   4   -4.95    9.26
  -1 -21  -4   12.76    8.81
   1  21   4    6.78    8.50
  -2 -21  -4   45.42   12.41
   2  21   4   26.24   10.97
  -3 -21  -4   29.38   11.33
   3 -21   4   23.36   11.90
   3  21   4   17.77    9.81
  -4 -21  -4   -0.60    9.24
   4 -21   4   -0.40   10.40
   4  21   4   -2.41    8.49
   2 -22  -4    8.87   10.72
   2 -22  -4    9.70   11.04
  -2  22   4  -10.56    8.39
   1 -22  -4    7.60    9.57
   1 -22  -4   14.13   10.83
  -1  22   4   15.47   10.71
   0 -22  -4   -2.03    9.68
   0  22   4    0.37    8.45
  -1 -22  -4   96.32   15.29
   1  22   4   77.44   15.14
  -2 -22  -4   10.28    9.77
   2  22   4    6.93    9.91
  11   0  -5    2.57    8.25
  11   0  -5   -1.42    9.57
  10   0  -5    9.74    9.27
  10   0  -5    3.37    8.96
   9   0  -5   13.59    8.41
   9   0  -5   -3.36    6.97
   8   0  -5    0.58    6.93
   8   0  -5    2.91    2.08
   8   0  -5   -4.40    4.47
   8   0  -5    5.32    6.45
   7   0  -5   -4.48    4.16
   7   0  -5   -2.10    5.56
   7   0  -5   -1.62    5.71
   7   0  -5    0.34    1.87
   6   0  -5   -9.05    4.42
   6   0  -5   -9.51    3.78
   6   0  -5    0.86    1.87
   6   0  -5    1.99    1.63
   6   0  -5   -5.48    4.49
   5   0  -5    4.59    4.43
   5   0  -5    4.20    1.99
   5   0  -5   -7.65    4.29
   5   0  -5    1.58    1.57
   5   0  -5   -3.70    3.75
   4   0  -5   -1.37    4.04
   4   0  -5   -1.07    1.93
   4   0  -5   -0.63    3.67
   4   0  -5    1.85    1.74
   4   0  -5    0.02    4.29
   3   0  -5    0.01    1.93
   3   0  -5   -0.23    3.33
   3   0  -5    4.77    4.26
   3   0  -5    4.52    3.70
   3   0  -5   -0.49    2.28
   2   0  -5    4.65    2.81
   2   0  -5   -0.50    2.50
   2   0  -5   -0.07    2.67
  -2   0   5    1.20    2.28
   2   0  -5   -2.31    3.80
   1   0  -5    1.58    3.25
  -1   0   5   -2.44    2.46
   1   0  -5   -3.17    2.48
   1   0  -5   -2.39    3.77
   0   0   5    2.11    3.17
   0   0  -5    2.59    3.43
   1   0   5   -0.21    3.67
  -1   0  -5   -1.88    3.98
   2   0   5   -1.22    3.99
   3   0   5    0.26    4.27
  -4   0  -5    2.33    4.10
   4   0   5   -0.77    3.96
   4   0   5    6.71    4.76
  -5   0  -5    4.52    4.88
   5   0   5   -6.56    4.01
   5   0   5    2.77    4.12
   6   0   5    2.40    4.89
   6   0   5   -1.97    4.96
  -6   0  -5    6.47    5.30
   7   0   5   -1.23    5.16
   7   0   5   -5.63    5.60
   8   0   5    5.37    6.02
   8   0   5    8.67    7.31
   9   0   5    4.99    8.34
   9   0   5   -1.61    6.29
  10   0   5  -11.00    7.97
  10   0   5   -0.07    6.30
  11   0   5   15.67   10.36
  11   0   5    0.10    6.91
  11  -1  -5    1.53   10.32
  11  -1  -5   15.30   10.98
  11   1  -5   12.18   10.48
  11   1  -5   14.29   11.37
  10  -1  -5   52.22   11.81
  10  -1  -5   50.61   11.90
  10   1  -5   47.87   11.33
  10   1  -5   59.38   13.09
   9  -1  -5    0.78    2.77
   9  -1  -5   -5.56    7.62
   9  -1  -5    3.87    8.85
   9   1  -5   13.70    8.43
   9   1  -5   -1.43    7.14
   8  -1  -5  127.87   15.04
   8  -1  -5  133.35    7.40
   8  -1  -5  149.18   14.26
   8   1  -5  121.90   14.09
   8   1  -5  137.02   12.04
   8   1  -5  151.10   14.88
   7  -1  -5  119.09    6.75
   7  -1  -5  134.48   11.34
   7  -1  -5  117.20   11.77
   7  -1  -5  159.08   15.46
   7   1  -5  114.77   13.12
   7   1  -5  137.40   11.81
   7   1  -5  124.59   12.59
   6  -1  -5  280.94   11.36
   6  -1  -5  305.04   15.31
   6  -1  -5  266.49   16.25
   6  -1  -5  256.98   14.85
   6   1  -5  281.81   15.33
   6   1  -5  268.26   15.35
   6   1  -5  280.81   16.53
   5  -1  -5   66.12    7.48
   5  -1  -5   59.59    8.39
   5  -1  -5   48.59    7.09
   5  -1  -5   60.36    4.80
   5  -1  -5   58.50    4.25
   5   1  -5   66.76    8.13
   5   1  -5   69.61    8.17
   5   1  -5   55.04    7.77
   4  -1  -5  382.47   16.64
   4  -1  -5  418.98   19.26
   4  -1  -5  416.09   15.14
   4  -1  -5  411.57   15.31
   4  -1  -5  432.94   18.36
   4   1  -5  408.73   14.04
   4   1  -5  426.98   14.05
   4   1  -5  399.37   18.59
   4   1  -5  411.06   18.51
   4   1  -5  414.32   17.64
   3  -1  -5   15.41    3.70
   3  -1  -5   13.87    3.27
   3  -1  -5   15.23    5.01
   3  -1  -5   17.16    2.92
   3  -1  -5   15.70    5.19
   3   1  -5   16.74    4.33
  -3   1   5   13.05    2.61
   3   1  -5   17.80    2.85
   3   1  -5   15.04    2.49
   3   1  -5   24.89    5.10
   3   1  -5   20.53    5.06
   2  -1  -5   10.58    2.84
   2  -1  -5   12.25    3.45
   2  -1  -5   21.00    5.04
   2  -1  -5   13.01    3.29
  -2  -1   5   15.15    2.82
   2   1  -5    9.73    3.10
  -2   1   5    7.41    2.87
   2   1  -5   21.94    5.07
   2   1  -5   12.76    2.82
  -1  -1   5  167.99    8.19
   1  -1  -5  161.23    8.22
   1  -1  -5  165.42    8.93
   1   1  -5  156.74    6.88
  -1   1   5  171.04    8.52
   0  -1   5   38.41    4.94
   0  -1  -5   38.81    5.56
   0   1  -5   41.28    5.49
   0   1   5   37.16    4.66
  -1  -1  -5  545.00   21.29
   1  -1   5  528.11   20.83
   1   1   5  528.36   20.91
  -1   1  -5  549.63   20.23
  -2  -1  -5   40.86    6.35
   2  -1   5   36.40    5.59
   2   1   5   33.35    5.91
   2   1   5   28.76    4.23
  -3  -1  -5   25.19    5.47
   3  -1   5   27.86    5.81
   3   1   5   20.75    5.19
   3   1   5   26.97    5.00
   4  -1   5  306.93   15.60
  -4  -1  -5  299.52   15.42
   4   1   5  327.14   15.87
   4   1   5  294.77   14.64
   5  -1   5  260.64   14.81
  -5  -1  -5  275.36   14.68
   5  -1   5  257.44   14.85
   5   1   5  270.11   14.65
   5   1   5  270.51   14.90
   6  -1   5   24.94    7.26
  -6  -1  -5   38.66    7.23
   6  -1   5   29.93    7.13
   6   1   5   38.87    7.91
   6   1   5   29.69    6.70
   7  -1   5   13.51    6.00
   7  -1   5   10.49    6.46
   7   1   5    5.55    6.04
   7   1   5    2.96    5.77
   8  -1   5   89.77   11.45
   8  -1   5   73.77   11.37
   8   1   5   85.88   12.59
   8   1   5   99.05   11.53
   9  -1   5   74.33   12.56
   9  -1   5   70.95   11.07
   9   1   5   67.17   10.77
   9   1   5   48.66   11.35
  10  -1   5   18.29    9.95
  10  -1   5   17.56    8.46
  10   1   5    9.17    7.74
  10   1   5   27.41   10.77
  11  -1   5    8.78   10.15
  11  -1   5   20.29    8.37
  11   1   5    0.79    8.84
  11   1   5    2.01    7.39
  11  -2  -5   21.19   10.85
  11  -2  -5   44.64   12.35
  11   2  -5   38.83   12.56
  11   2  -5   44.17   12.56
  10  -2  -5   57.85   12.24
  10  -2  -5   58.03   12.18
  10   2  -5   71.69   13.41
  10   2  -5   58.37   12.40
   9  -2  -5   42.06   10.35
   9  -2  -5   20.72   10.24
   9  -2  -5   35.08    5.21
   9   2  -5   37.47   10.50
   9   2  -5   10.36    8.29
   8  -2  -5   74.37   10.59
   8  -2  -5   71.61    6.40
   8  -2  -5   51.98   11.56
   8   2  -5   82.03    9.34
   8   2  -5   74.39   11.91
   8   2  -5   50.90   10.18
   7  -2  -5   -2.24    2.85
   7  -2  -5    4.86    6.17
   7  -2  -5   -7.21    4.78
   7   2  -5   -2.51    5.77
   7   2  -5   -3.73    4.49
   7   2  -5    1.31    5.39
   6  -2  -5  168.46   11.39
   6  -2  -5  180.99   15.35
   6  -2  -5  180.38    9.14
   6   2  -5  182.06   12.12
   6   2  -5  179.85   13.23
   6   2  -5  184.06   12.72
   5  -2  -5  259.31   11.46
   5  -2  -5  265.30   15.22
   5  -2  -5  273.82   11.22
   5  -2  -5  251.04   12.96
   5   2  -5  264.37   14.57
   5   2  -5  268.04   14.78
   5   2  -5  261.70   14.41
   4  -2  -5  297.52   12.01
   4  -2  -5  282.96   12.85
   4  -2  -5  274.83   14.92
   4  -2  -5  288.08   12.21
   4   2  -5  288.95   14.36
   4   2  -5  299.32   14.87
   4   2  -5  296.96   14.26
  -4   2   5  297.48   11.70
   3  -2  -5  209.13    9.45
   3  -2  -5  215.79   12.23
   3  -2  -5  202.46    9.78
   3  -2  -5  191.31    9.21
  -3   2   5  213.49    9.28
   3   2  -5  184.27   11.43
   3   2  -5  206.98    8.25
   3   2  -5  193.80   10.83
   3   2  -5  205.40    8.05
   3   2  -5  213.58   11.13
   2  -2  -5  165.24    9.29
   2  -2  -5  169.15    7.17
   2  -2  -5  185.53    9.16
  -2  -2   5  166.03    7.41
   2   2  -5  165.77    7.76
  -2   2   5  165.23    8.43
   2   2  -5  171.68   10.30
  -1  -2   5  571.30   20.86
   1  -2  -5  565.23   20.99
   1  -2  -5  630.30   22.13
  -1   2   5  593.17   21.53
   1   2  -5  561.80   22.34
   0  -2   5   67.04    6.12
   0  -2  -5   85.01    7.62
   0   2  -5   68.21    6.76
   0   2   5   71.83    7.03
  -1  -2  -5   22.92    5.35
   1  -2   5   23.54    4.74
  -1   2  -5   17.95    4.08
   1   2   5   12.05    4.45
   1   2   5   18.51    3.13
   2  -2   5  150.42    9.36
  -2  -2  -5  142.62   10.00
   2   2   5  154.85    9.81
   2   2   5  140.95    7.89
  -2   2  -5  153.70    8.17
   3  -2   5  670.78   26.19
  -3  -2  -5  672.05   26.01
   3   2   5  634.20   24.30
   3   2   5  677.04   26.13
   4  -2   5  105.36    9.69
  -4  -2  -5  137.91   10.89
   4   2   5  113.12    8.93
   4   2   5  115.74   10.10
   5  -2   5    4.98    4.99
  -5  -2  -5   -2.84    4.15
   5   2   5    4.99    4.61
   5   2   5    6.06    4.86
   6  -2   5  156.80   11.95
  -6  -2  -5  142.93   12.16
   6  -2   5  143.04   13.27
   6   2   5  143.43   13.22
   6   2   5  152.85   11.55
   7  -2   5   73.74    9.56
   7  -2   5   56.34    9.60
   7   2   5   71.64    9.34
   7   2   5   57.04    9.75
   8  -2   5  -10.59    5.37
   8  -2   5    2.75    7.17
   8   2   5   -3.29    6.63
   8   2   5    7.18    6.18
   9  -2   5   15.97    7.62
   9  -2   5    5.77    7.95
   9   2   5    2.90    6.92
   9   2   5    2.99    7.82
  10  -2   5   90.71   12.62
  10  -2   5   72.93   12.82
  10   2   5  101.03   15.77
  10   2   5   95.53   12.86
  11  -2   5   13.58    8.50
  11  -2   5    1.83    9.29
  11   2   5   19.73    8.78
  11   2   5   -5.68    9.50
  11  -3  -5   26.18   11.42
  11  -3  -5   26.53   11.89
  11   3  -5   29.74   12.22
  11   3  -5   17.17   10.73
  10  -3  -5    7.73    4.54
  10  -3  -5   10.95    9.56
  10  -3  -5   -3.95    8.65
  10   3  -5   11.39    9.03
  10   3  -5   11.35    9.24
   9  -3  -5    5.77    8.62
   9  -3  -5    2.13    3.85
   9  -3  -5  -11.29    6.12
   9   3  -5    3.43    7.67
   9   3  -5   -5.26    7.89
   8  -3  -5   38.16   10.05
   8  -3  -5   36.23    5.69
   8  -3  -5   42.47    8.85
   8   3  -5   26.77    9.50
   8   3  -5   40.69    7.80
   8   3  -5   41.41    9.83
   7  -3  -5    4.07    6.27
   7  -3  -5    4.18    3.56
   7  -3  -5    7.80    5.53
   7   3  -5   -7.45    5.60
   7   3  -5    8.46    6.44
   7   3  -5    2.63    5.06
   6  -3  -5    0.13    5.63
   6  -3  -5   -0.97    3.88
   6  -3  -5   -2.52    3.22
   6   3  -5   10.16    6.37
   6   3  -5   -3.48    4.39
   6   3  -5    4.32    4.60
   5  -3  -5   36.07    5.04
   5  -3  -5   31.48    5.63
   5  -3  -5   29.19    6.52
   5   3  -5   21.23    6.00
   5   3  -5   28.30    6.73
   5   3  -5   36.54    6.66
   4  -3  -5  159.91   11.57
   4  -3  -5  160.68    8.89
   4  -3  -5  163.74    8.97
   4  -3  -5  150.41    8.35
   4   3  -5  148.22   10.67
  -4   3   5  167.62    8.32
   4   3  -5  168.06   10.32
   4   3  -5  161.91   10.86
   3  -3  -5    9.64    3.73
   3  -3  -5    8.88    5.15
   3  -3  -5   12.69    3.21
   3   3  -5    9.06    3.78
   3   3  -5    9.77    4.69
   3   3  -5   19.81    4.97
  -3   3   5   14.77    3.52
   3   3  -5   13.22    2.42
   2  -3  -5  103.28    7.63
  -2  -3   5   96.96    5.53
   2  -3  -5   95.97    4.93
   2  -3  -5   94.61    7.46
  -2   3   5  103.72    6.96
   2   3  -5  104.10    5.91
   2   3  -5  110.42    9.24
  -1  -3   5   34.12    4.20
   1  -3  -5   39.64    5.41
   1  -3  -5   26.10    4.92
   1   3  -5   26.11    5.17
  -1   3   5   36.33    5.22
   0  -3   5  299.85   13.19
   0  -3  -5  320.24   14.35
   0   3   5  295.06   13.50
   0   3  -5  298.37   13.57
   1  -3   5   21.47    4.93
  -1  -3  -5   22.65    5.14
  -1   3  -5   24.63    4.55
   1   3   5   20.10    4.51
   1   3   5   28.03    3.43
  -2  -3  -5    4.15    4.66
   2  -3   5    5.28    4.24
  -2   3  -5    2.91    2.97
   2   3   5    4.74    3.17
   2   3   5    3.52    3.84
  -3  -3  -5   -1.66    4.20
   3  -3   5    1.54    4.50
   3   3   5    5.44    3.77
   3   3   5    1.42    3.88
  -4  -3  -5    0.72    4.61
   4  -3   5    3.99    4.28
   4   3   5    4.82    4.37
   4   3   5    2.26    4.55
  -5  -3  -5    5.57    4.84
   5  -3   5    0.53    4.71
   5   3   5    1.90    4.61
   5   3   5    0.60    4.41
  -6  -3  -5   15.30    5.80
   6  -3   5    3.99    5.10
   6  -3   5   17.41    6.07
   6   3   5    4.44    5.30
   6   3   5   -1.20    5.28
   7  -3   5    5.02    5.69
   7  -3   5   -4.32    6.12
   7   3   5   -8.41    4.71
   7   3   5    3.44    6.04
   8  -3   5   57.91    9.93
   8  -3   5   38.92    9.46
   8   3   5   55.90   10.81
   8   3   5   43.44    8.65
   9  -3   5   -9.61    7.31
   9  -3   5   -9.32    5.86
   9   3   5    2.17    7.80
   9   3   5    4.87    6.66
  10  -3   5    4.30    7.97
  10  -3   5   -0.14    7.95
  10   3   5   -1.41    8.56
  10   3   5   -3.13    6.15
  11  -3   5   11.46    8.56
  11  -3   5   -7.50    8.65
  11   3   5   -6.40    9.30
  11   3   5   -5.25    7.09
  11  -4  -5   17.73   10.39
  11  -4  -5    5.91    9.72
  11   4  -5    2.02    9.63
  11   4  -5   12.78   10.71
  10  -4  -5  -15.25    6.55
  10  -4  -5    3.01    9.56
  10  -4  -5    5.30    4.62
  10   4  -5    0.55    9.07
  10   4  -5   -2.51    7.95
   9  -4  -5   59.15   11.63
   9  -4  -5   59.93   11.16
   9  -4  -5   69.71    8.00
   9   4  -5   65.35   12.24
   9   4  -5   82.26   10.40
   9   4  -5   49.49   11.23
   8  -4  -5  253.32   13.04
   8  -4  -5  223.10   15.61
   8  -4  -5  231.90   17.88
   8   4  -5  265.38   18.35
   8   4  -5  229.12   15.14
   8   4  -5  240.17   17.12
   7  -4  -5   -6.73    6.54
   7  -4  -5   -2.01    3.97
   7  -4  -5   -5.46    4.63
   7   4  -5    1.80    6.39
   7   4  -5    9.06    5.72
   7   4  -5    1.77    5.76
   6  -4  -5  154.24   10.45
   6  -4  -5  136.18   13.43
   6  -4  -5  142.11    9.63
   6   4  -5  164.24   12.75
   6   4  -5  153.79   11.63
   6   4  -5  147.30   12.50
   5  -4  -5   84.59    7.60
   5  -4  -5   76.27   10.26
   5  -4  -5   72.91    7.40
   5   4  -5   66.11    8.89
   5   4  -5   81.33    9.03
   5   4  -5   88.97    9.16
  -5   4   5   86.56    6.51
   4  -4  -5   17.15    4.40
   4  -4  -5   17.10    6.28
   4  -4  -5    9.14    3.35
   4   4  -5   17.56    2.12
   4   4  -5   11.77    4.19
   4   4  -5    8.05    4.62
   4   4  -5   21.44    6.10
  -4   4   5   17.70    3.94
   3  -4  -5   51.89    7.22
   3  -4  -5   61.19    6.33
   3  -4  -5   53.35    4.87
   3   4  -5   50.61    7.35
   3   4  -5   70.19    7.79
  -3   4   5   58.84    6.06
   3   4  -5   56.95    4.05
   3   4  -5   60.79    6.42
   2  -4  -5  753.08   31.78
   2  -4  -5  948.13   32.30
  -2  -4   5  893.41   30.19
   2  -4  -5  919.04   29.09
   2   4  -5  911.41   33.14
  -2   4   5  897.40   31.84
   2   4  -5  936.55   30.68
   2   4  -5  937.02   31.62
   1  -4  -5  344.29   15.42
  -1  -4   5  353.17   14.31
   1  -4  -5  359.53   15.90
  -1   4   5  388.50   15.69
   1   4  -5  348.51   15.93
   0  -4   5   79.71    7.15
   0  -4  -5   86.51    7.56
   0  -4  -5   92.22    7.93
   0   4  -5  107.81    8.42
   0   4   5  102.18    7.97
  -1  -4  -5  123.48    9.49
   1  -4   5  125.32    8.36
   1   4   5  127.88    6.38
   1   4   5  113.11    8.54
  -1   4  -5  117.66    7.70
   2  -4   5  296.11   14.72
  -2  -4  -5  304.44   14.89
   2   4   5  300.14   12.66
   2   4   5  307.72   14.77
  -2   4  -5  284.03   12.46
  -3  -4  -5 1042.38   37.87
   3  -4   5 1058.54   38.32
   3   4   5 1054.45   37.95
  -3   4  -5 1002.55   34.45
   3   4   5 1031.59   36.10
   4  -4   5  224.91   13.61
  -4  -4  -5  239.89   13.60
   4   4   5  269.43   13.33
   4   4   5  250.68   13.87
   5  -4   5   32.56    7.21
  -5  -4  -5   26.35    6.16
   5   4   5   29.95    6.33
   5   4   5   22.80    5.81
   6  -4   5  272.51   16.12
  -6  -4  -5  260.91   14.98
   6   4   5  242.06   14.93
   6   4   5  263.43   15.69
   7  -4   5   28.36    7.74
   7  -4   5   23.36    7.85
   7   4   5   34.73    8.21
   7   4   5   29.59    7.06
   8  -4   5   -3.15    6.79
   8  -4   5    2.61    5.86
   8   4   5    4.60    5.83
   8   4   5   -7.78    6.54
   9  -4   5   18.60    7.82
   9  -4   5   23.61   10.53
   9   4   5   38.79    8.80
   9   4   5   32.14   10.51
  10  -4   5   23.07   10.81
  10  -4   5    6.82    7.99
  10   4   5   16.08    8.41
  10   4   5   28.16   10.16
  11  -4   5    4.26    8.86
  11  -4   5   24.45    9.62
  11   4   5    7.09    9.67
  11   4   5   -1.97    7.49
  11  -5  -5   45.77   12.28
  11  -5  -5   34.85    7.30
  11  -5  -5   40.95   13.07
  11   5  -5   42.29   11.70
  11   5  -5   38.97   12.86
  10  -5  -5   93.44    9.95
  10  -5  -5  106.35   13.77
  10  -5  -5   88.91   15.58
  10   5  -5   91.25   15.14
  10   5  -5   82.54   13.49
   9  -5  -5    4.23    7.83
   9  -5  -5    5.91    5.15
   9  -5  -5    7.00    7.34
   9   5  -5    5.60    6.87
   9   5  -5   10.83    6.49
   9   5  -5   29.09   10.65
   8  -5  -5  109.00   14.61
   8  -5  -5  121.42   12.93
   8  -5  -5  125.29   10.86
   8   5  -5  162.44   15.21
   8   5  -5  129.81   12.89
   8   5  -5  107.89   14.57
   7  -5  -5  245.40   13.86
   7  -5  -5  236.92   14.83
   7  -5  -5  265.20   18.34
   7   5  -5  255.96   17.45
   7   5  -5  257.11   15.87
   7   5  -5  257.39   16.13
   6  -5  -5  125.68    9.80
   6  -5  -5  126.54   12.95
   6  -5  -5  128.53    9.81
   6   5  -5  142.39   12.94
   6   5  -5  126.47   11.59
   6   5  -5  117.85   11.69
   5  -5  -5    0.13    3.97
   5  -5  -5   -3.47    5.35
   5  -5  -5    0.69    3.40
   5   5  -5    0.79    4.80
   5   5  -5    4.45    3.90
  -5   5   5    4.25    3.57
   5   5  -5   13.96    6.57
   4  -5  -5   93.75    6.90
   4  -5  -5  108.28    8.91
   4  -5  -5   97.93   10.27
   4   5  -5  104.14    5.18
   4   5  -5  109.58   10.53
   4   5  -5   90.52    9.87
  -4   5   5  101.10    7.76
   4   5  -5   98.60    7.69
   3  -5  -5  481.37   19.89
   3  -5  -5  490.07   17.70
   3  -5  -5  485.69   21.34
   3   5  -5  498.62   17.66
   3   5  -5  437.40   20.76
  -3   5   5  486.93   19.57
   3   5  -5  503.28   19.19
  -2  -5   5  525.43   19.33
   2  -5  -5  550.18   21.62
   2  -5  -5  552.58   21.74
   2   5  -5  545.95   22.25
   2   5  -5  520.31   19.60
  -2   5   5  525.30   20.88
   2   5  -5  520.88   19.61
   1  -5  -5   41.87    5.79
   1  -5  -5   37.70    6.27
  -1  -5   5   40.11    5.06
   1   5  -5   41.88    6.14
  -1   5   5   47.67    6.43
   0  -5   5  459.48   18.18
   0  -5  -5  399.60   18.55
   0  -5  -5  441.80   18.40
   0   5  -5  450.10   18.34
   0   5   5  456.51   18.70
  -1  -5  -5  979.86   34.01
   1  -5   5  898.92   33.19
  -1   5  -5  902.50   32.10
   1   5   5  896.55   33.46
   1   5   5  892.14   30.26
  -2  -5  -5   53.48    7.40
   2  -5   5   49.84    6.68
  -2   5  -5   57.38    5.59
   2   5   5   46.32    6.97
   2   5   5   59.05    5.97
   3  -5   5    4.44    4.33
  -3  -5  -5    4.17    4.06
  -3   5  -5   10.85    3.15
   3   5   5    6.25    3.91
   3   5   5    6.38    4.66
  -4  -5  -5  132.31   10.38
   4  -5   5  139.45   10.98
   4   5   5  139.97    9.82
  -4   5  -5  141.66    6.65
   4   5   5  131.00   10.02
  -5  -5  -5  196.98   12.69
   5  -5   5  201.24   13.16
   5   5   5  187.61   12.62
   5   5   5  196.37   12.75
   6  -5   5    3.28    5.63
  -6  -5  -5    4.16    5.45
   6   5   5    8.10    5.94
   6   5   5   -3.39    4.74
   7  -5   5   10.88    6.43
   7   5   5   10.70    6.20
   7   5   5   14.12    7.44
   8  -5   5  167.51   16.13
   8  -5   5  162.54   16.33
   8   5   5  164.86   14.81
   8   5   5  163.52   16.12
   9  -5   5   22.95    8.38
   9  -5   5    4.77    7.65
   9   5   5   15.64    9.04
   9   5   5   14.38    7.33
  10  -5   5    0.79    8.44
  10  -5   5   17.37    8.19
  10   5   5   -0.08    8.51
  10   5   5    5.23    7.72
  11  -5   5    0.99    9.49
  11  -5   5   -2.74    8.01
  11   5   5   -2.88    9.55
  11   5   5   16.56    8.73
  11  -6  -5    6.82    5.98
  11  -6  -5   -5.38    8.43
  11  -6  -5    2.03    9.31
  11   6  -5   10.63   10.38
  10  -6  -5    9.29    9.95
  10  -6  -5   -5.76    5.16
  10  -6  -5   -4.35    6.96
  10   6  -5    2.88    7.53
  10   6  -5   23.47   11.11
   9  -6  -5   -9.19    6.60
   9  -6  -5    1.08    7.13
   9  -6  -5  -11.25    4.88
   9   6  -5    5.27    6.71
   9   6  -5   -1.53    6.25
   9   6  -5  -11.89    7.35
   8  -6  -5   -1.46    5.86
   8  -6  -5    9.71    7.76
   8  -6  -5    3.48    5.61
   8   6  -5    7.92    6.24
   8   6  -5    6.62    6.22
   8   6  -5   10.73    8.70
   7  -6  -5   17.31    6.04
   7  -6  -5   18.48    6.13
   7  -6  -5    4.15    7.58
   7   6  -5    8.08    5.80
   7   6  -5    9.89    7.82
   7   6  -5   18.53    6.74
   6  -6  -5    2.70    4.67
   6  -6  -5   -0.57    4.13
   6  -6  -5   -0.94    5.61
   6   6  -5    1.16    4.48
   6   6  -5    6.33    5.91
   6   6  -5    4.02    6.54
   5  -6  -5    3.69    3.81
   5  -6  -5    3.19    4.41
   5  -6  -5   -3.84    4.78
   5   6  -5    0.71    1.52
   5   6  -5    6.55    3.96
   5   6  -5    0.91    5.35
   5   6  -5    8.36    6.60
  -5   6   5    0.83    3.88
   4  -6  -5   29.77    4.68
   4  -6  -5   41.84    7.93
   4  -6  -5   29.40    5.80
   4   6  -5   37.06    5.31
  -4   6   5   33.31    5.53
   4   6  -5   37.88    7.33
   4   6  -5   49.04    7.91
   4   6  -5   35.18    3.72
   3  -6  -5  261.26   14.28
  -3  -6   5  247.32    9.91
   3  -6  -5  236.61   12.73
   3   6  -5  226.75   13.32
   3   6  -5  228.90   10.26
   3   6  -5  225.02   10.76
  -3   6   5  229.85   12.38
  -2  -6   5   11.65    3.40
   2  -6  -5    6.24    5.01
   2  -6  -5   17.94    4.92
   2   6  -5   13.17    5.15
  -2   6   5   16.19    4.62
   2   6  -5   12.54    2.76
   1  -6  -5  172.94   11.68
  -1  -6   5  203.84   10.33
   1  -6  -5  183.75   11.04
   1   6  -5  193.06   11.22
  -1   6   5  212.18   11.66
   0  -6   5  111.78    8.36
   0  -6  -5  126.04    9.52
   0  -6  -5  127.11    9.35
   0   6   5  131.51    9.52
   0   6  -5  131.50    9.08
  -1  -6  -5   88.83    9.31
   1  -6   5  112.09    9.50
   1   6   5   90.10    8.96
   1   6   5   71.53    5.80
  -1   6  -5  100.25    8.18
  -2  -6  -5  515.87   21.98
   2  -6   5  531.98   21.80
   2   6   5  495.80   19.48
   2   6   5  507.49   21.76
  -2   6  -5  498.51   19.51
  -3  -6  -5   -1.22    4.32
   3  -6   5    4.93    4.76
   3   6   5   -0.96    4.38
   3   6   5    3.01    3.87
  -3   6  -5    5.23    2.92
   4  -6   5    8.45    5.59
  -4  -6  -5   10.06    4.65
  -4   6  -5   11.08    2.91
   4   6   5   13.42    5.15
   4   6   5   11.64    5.28
   5  -6   5    1.44    5.37
  -5  -6  -5    6.38    5.01
   5   6   5    6.20    4.88
   5   6   5   -0.70    5.03
   6  -6   5   34.38    8.17
   6   6   5   47.09    8.90
   6   6   5   37.90    7.55
   7  -6   5   45.70    9.46
   7   6   5   40.45    8.38
   7   6   5   62.44   10.47
   8  -6   5   17.36    7.64
   8  -6   5    8.85    8.00
   8   6   5   13.84    8.17
   8   6   5   19.90    7.17
   9  -6   5   -1.07    8.48
   9  -6   5   11.73    7.37
   9   6   5    5.55    8.29
   9   6   5   11.65    7.46
  10  -6   5   -1.94    6.98
  10  -6   5    5.88    9.01
  10   6   5    9.15    9.20
  10   6   5   14.55    7.96
  11  -6   5   -5.33    8.01
  11  -6   5   15.84    9.08
  11   6   5    3.75    8.53
  11   6   5   20.82   11.18
  11  -7  -5   27.07    7.98
  11  -7  -5   15.22   12.17
  11  -7  -5   24.62   10.42
  11   7  -5   12.95   11.43
  10  -7  -5   59.69   11.90
  10  -7  -5   43.96   12.24
  10  -7  -5   61.77    9.63
  10   7  -5   61.93   14.07
   9  -7  -5   -4.32    6.25
   9  -7  -5   -0.26    6.08
   9  -7  -5    1.57    8.58
   9   7  -5   10.23    6.97
   9   7  -5   14.66    7.57
   9   7  -5   -6.93    8.81
   8  -7  -5   26.31    7.55
   8  -7  -5   14.45    9.39
   8  -7  -5   27.85    8.19
   8   7  -5   34.02    7.70
   8   7  -5   42.07    9.21
   8   7  -5   52.82   11.44
   7  -7  -5   63.91    9.04
   7  -7  -5   87.69    9.99
   7  -7  -5   69.06   10.82
   7   7  -5   73.09    9.66
   7   7  -5   48.61    9.79
   7   7  -5   78.25   10.68
   6  -7  -5   99.14   11.90
   6  -7  -5  112.52   10.17
   6  -7  -5   95.58   10.35
   6   7  -5  112.15   10.40
   6   7  -5   94.36   12.88
   6   7  -5  108.87   12.29
   5  -7  -5   -2.66    4.92
   5  -7  -5    0.68    4.88
   5  -7  -5    2.45    3.68
   5   7  -5   -4.13    2.98
   5   7  -5    5.40    5.55
   5   7  -5    4.00    5.50
   4  -7  -5   19.85    6.26
   4  -7  -5   30.09    6.40
   4   7  -5   35.72    4.77
   4   7  -5   26.78    3.76
   4   7  -5   33.42    7.43
  -4   7   5   23.86    5.41
   3  -7  -5  307.02   16.35
   3  -7  -5  297.95   15.32
   3  -7  -5  320.89   16.27
  -3  -7   5  319.90   12.70
  -3   7   5  285.26   14.79
   3   7  -5  306.71   12.71
   3   7  -5  296.94   12.90
   3   7  -5  305.10   16.43
   2  -7  -5  314.20   16.05
  -2  -7   5  336.65   13.98
   2  -7  -5  315.50   16.29
   2   7  -5  336.34   12.56
  -2   7   5  316.62   15.65
   2   7  -5  321.12   16.17
  -1  -7   5   67.95    6.79
  -1  -7   5   56.16    3.61
   1  -7  -5   58.93    7.89
   1  -7  -5   60.77    7.78
   1   7  -5   62.09    7.29
  -1   7   5   53.48    7.30
   0  -7   5  302.20   14.70
   0  -7  -5  303.72   15.31
   0  -7  -5  340.92   16.59
   0   7  -5  338.34   15.33
   0   7   5  299.64   15.36
  -1  -7  -5  216.06   13.33
   1  -7   5  234.68   12.69
  -1   7  -5  200.64   11.25
   1   7   5  226.99   13.29
   2  -7   5   27.43    5.91
  -2  -7  -5   29.30    6.16
  -2   7  -5   37.66    5.38
   2   7   5   46.46    5.80
   2   7   5   42.24    6.71
   3  -7   5  138.94   11.05
  -3  -7  -5  143.12   11.06
   3   7   5  150.14   10.06
  -3   7  -5  125.99    8.04
   3   7   5  137.73   11.80
  -4  -7  -5  129.89   11.28
   4  -7   5  112.53   11.39
   4   7   5  106.62   10.68
  -4   7  -5  105.35    6.69
   4   7   5  119.45   10.98
   5  -7   5  168.85   13.18
  -5  -7  -5  145.43   11.71
   5   7   5  162.08   12.26
   5   7   5  158.17   12.21
   6  -7   5   78.13   11.06
   6   7   5   64.19   10.43
   6   7   5   57.61    8.93
   7  -7   5   13.70    7.20
   7   7   5   14.39    8.03
   7   7   5   17.74    7.03
   8  -7   5  234.03   19.85
   8   7   5  185.40   18.18
   8   7   5  197.57   15.63
   9  -7   5    8.96    8.82
   9  -7   5   25.97    9.39
   9   7   5   29.09    8.99
   9   7   5   22.85   10.27
  10  -7   5   10.16    9.18
  10  -7   5   -9.81    7.28
  10   7   5   -0.12    8.62
  10   7   5   -4.76    7.48
  11  -8  -5   -6.90    6.49
  11  -8  -5    8.19    9.74
  11  -8  -5    4.71   10.63
  11   8  -5    5.60   11.20
  10  -8  -5    8.90    6.95
  10  -8  -5   21.88   11.33
  10  -8  -5    5.33    8.41
  10   8  -5   -3.51    6.32
  10   8  -5   17.83   11.52
   9  -8  -5   38.37    8.89
   9  -8  -5   38.63    9.39
   9  -8  -5   15.69   10.04
   9   8  -5   40.20    9.75
   9   8  -5   53.98   13.03
   8  -8  -5   74.69   12.67
   8  -8  -5   95.55   11.71
   8  -8  -5  115.26   12.57
   8   8  -5  109.03   13.47
   8   8  -5  115.26   12.24
   8   8  -5   94.73   14.24
   7  -8  -5   11.95    6.28
   7  -8  -5   11.14    7.30
   7  -8  -5   -0.08    5.39
   7   8  -5    5.47    8.00
   7   8  -5    7.29    4.90
   7   8  -5    6.27    6.92
   6  -8  -5   34.08    8.39
   6  -8  -5   40.41    6.94
   6  -8  -5   40.39    7.85
   6   8  -5   36.09    8.49
   6   8  -5   19.62    8.49
   6   8  -5   32.89    5.96
   5  -8  -5  134.41   13.36
   5  -8  -5  145.24   12.28
   5   8  -5  128.97   13.00
   5   8  -5  141.94    9.36
   4  -8  -5  384.35   18.98
   4  -8  -5  411.57   20.51
  -4   8   5  361.12   18.28
   4   8  -5  416.07   20.55
   4   8  -5  415.85   16.53
   3  -8  -5   92.35   10.07
  -3  -8   5  111.78    7.22
   3  -8  -5   97.92   10.47
   3  -8  -5  114.62   10.80
   3   8  -5  113.41    6.22
   3   8  -5  108.00   11.13
  -3   8   5  120.42   10.65
  -2  -8   5  120.16    8.02
   2  -8  -5  105.36   10.11
   2  -8  -5  149.69   10.95
   2   8  -5  139.26   10.78
   2   8  -5  122.16    5.77
  -2   8   5  137.43    9.76
  -1  -8   5  699.12   22.34
   1  -8  -5  686.57   27.66
   1  -8  -5  644.09   26.93
  -1  -8   5  671.60   25.71
   1   8  -5  677.98   27.01
   1   8  -5  648.68   22.32
  -1   8   5  689.58   27.28
   0  -8  -5  448.25   20.94
   0  -8  -5  428.98   20.04
   0  -8   5  464.64   19.59
   0   8  -5  489.41   20.01
   0   8   5  440.40   20.28
  -1  -8  -5    5.70    4.94
   1  -8   5   -1.80    3.88
   1   8   5    1.56    4.79
  -1   8  -5   -0.35    3.55
  -2  -8  -5  188.86   12.46
   2  -8   5  180.40   12.06
   2   8   5  172.11   10.13
  -2   8  -5  157.02    9.78
   2   8   5  152.30   11.83
   3  -8   5  585.84   25.04
   3   8   5  554.66   24.62
  -3   8  -5  570.62   21.88
   3   8   5  581.05   23.29
   4  -8   5   37.01    7.76
  -4  -8  -5   47.76    8.17
   4   8   5   42.73    7.31
  -4   8  -5   49.40    5.23
   4   8   5   41.55    8.14
   5  -8   5   39.56    8.35
  -5  -8  -5   36.69    7.64
   5   8   5   44.25    8.00
   5   8   5   48.12    8.94
   6  -8   5  180.89   15.96
   6   8   5  188.89   13.80
   6   8   5  190.23   14.84
   7  -8   5  166.37   16.24
   7   8   5  136.67   14.99
   7   8   5  153.03   13.96
   8  -8   5    0.62    6.82
   8   8   5    6.00    8.24
   8   8   5   -2.63    6.25
   9  -8   5    6.58    8.26
   9  -8   5   12.97    9.09
   9   8   5   10.04    7.51
   9   8   5    9.46    9.02
  10  -8   5   60.46   13.55
  10  -8   5   75.00   13.21
  10   8   5   79.97   12.54
  10   8   5   53.24   12.69
  10  -9  -5   -6.49    7.07
  10  -9  -5   -8.92    6.68
  10  -9  -5    3.54   10.61
  10   9  -5    0.61    7.69
  10   9  -5    7.41   11.42
   9  -9  -5   10.26    8.03
   9  -9  -5   15.57    7.98
   9  -9  -5    4.42    8.31
   9   9  -5   27.52    8.91
   9   9  -5   32.90   11.01
   8  -9  -5   19.47    9.11
   8  -9  -5    1.57    6.55
   8  -9  -5   12.56    7.05
   8   9  -5   12.87    8.09
   8   9  -5   10.43    9.82
   7  -9  -5    6.37    6.26
   7  -9  -5   11.10    6.05
   7  -9  -5   12.41    7.75
   7   9  -5   -3.79    6.53
   7   9  -5    8.75    4.97
   7   9  -5    0.05    8.11
   6  -9  -5    0.28    5.33
   6  -9  -5    1.06    6.88
   6  -9  -5    6.90    4.75
   6   9  -5    7.49    7.26
   6   9  -5   -0.54    7.42
   6   9  -5    4.91    3.89
   5  -9  -5    3.75    5.41
   5  -9  -5    2.54    5.54
   5   9  -5    6.32    5.95
   5   9  -5    1.21    3.27
   4  -9  -5   12.64    6.28
   4  -9  -5   24.99    6.76
   4   9  -5   13.31    6.27
   4   9  -5   23.51    3.99
  -4   9   5   20.88    5.72
   3  -9  -5   80.31   10.24
   3  -9  -5   87.71   10.25
   3  -9  -5  103.17   10.84
   3   9  -5   92.47    5.40
  -3   9   5   96.85   10.15
   3   9  -5  104.04   10.97
  -2  -9   5   27.08    5.01
   2  -9  -5   35.53    7.29
  -2  -9   5   39.06    4.23
   2  -9  -5   41.03    7.88
  -2   9   5   22.78    6.25
   2   9  -5   31.10    2.58
   2   9  -5   35.77    7.15
  -1  -9   5  180.69    8.22
   1  -9  -5  171.35   12.23
   1  -9  -5  191.96   12.80
  -1  -9   5  195.31   11.06
  -1   9   5  204.95   12.90
   1   9  -5  169.89   12.07
   0  -9  -5  244.33   14.49
   0  -9   5  248.87   13.42
   0  -9  -5  238.81   14.27
   0   9   5  246.26   14.28
   0   9  -5  245.05   13.58
   1  -9   5   34.61    6.40
  -1  -9  -5   63.16    8.63
   1   9   5   51.16    8.12
  -1   9  -5   62.79    7.45
  -2  -9  -5  304.55   16.83
   2  -9   5  285.28   15.52
  -2   9  -5  282.99   14.03
   2   9   5  272.78   15.71
  -3  -9  -5    3.43    4.81
   3  -9   5    1.09    5.42
   3   9   5    6.89    5.07
   3   9   5    2.32    4.79
  -3   9  -5    2.16    3.61
   4  -9   5   74.69    9.79
  -4  -9  -5   90.61   10.37
   4   9   5   83.16    9.82
   4   9   5   82.52   10.33
  -4   9  -5   85.75    7.14
  -5  -9  -5   13.47    6.46
   5  -9   5   18.29    7.53
   5   9   5   12.30    6.13
   5   9   5   15.40    6.77
   6  -9   5    5.10    7.12
   6   9   5   13.83    7.85
   6   9   5   13.31    6.83
   7  -9   5   14.48    7.64
   7   9   5   21.52    8.83
   7   9   5    9.69    6.64
   8  -9   5    7.04    7.57
   8   9   5    6.73    8.55
   8   9   5   14.86    7.56
   9  -9   5    3.42    8.22
   9  -9   5   -7.13    6.51
   9   9   5    3.06    7.48
   9   9   5    3.64    9.12
  10  -9   5   23.31    9.76
  10  -9   5    2.56    8.60
  10   9   5   -0.02    8.93
  10   9   5   14.29    8.72
  10 -10  -5   13.03    9.03
  10 -10  -5   20.76    9.58
  10 -10  -5    0.31   10.60
  10  10  -5   20.35    9.43
  10  10  -5   29.26   12.84
   9 -10  -5   32.46    9.20
   9 -10  -5   17.44    7.95
   9 -10  -5   26.48   11.00
   9  10  -5   16.47   10.18
   9  10  -5   11.20    8.63
   8 -10  -5   -0.98    7.45
   8 -10  -5    4.49    9.18
   8 -10  -5   10.50    7.55
   8  10  -5   19.69    8.63
   8  10  -5   -1.42    7.10
   7 -10  -5   -0.07    6.28
   7 -10  -5    7.97    5.58
   7 -10  -5   -6.51    7.19
   7  10  -5    0.16    7.84
   7  10  -5   -2.92    7.38
   6 -10  -5   13.03    6.68
   6 -10  -5   15.87    7.36
   6  10  -5   12.86    7.55
   5 -10  -5   91.48   11.23
   5 -10  -5   92.86   11.75
   5  10  -5  100.07   12.32
   4 -10  -5   79.97   10.27
   4 -10  -5   77.67    9.89
   4  10  -5   61.61    9.46
  -4  10   5   95.66   10.55
   3 -10  -5  113.69   11.81
   3 -10  -5   97.50   10.86
   3 -10  -5  102.24   11.37
  -3  10   5  106.91   10.56
   3  10  -5  103.58   11.06
  -2 -10   5   55.37    5.20
   2 -10  -5   48.73    8.05
   2 -10  -5   67.57    9.85
  -2 -10   5   53.50    6.52
  -2  10   5   73.69    9.64
   2  10  -5   53.81    8.31
   1 -10  -5  110.96   11.50
  -1 -10   5  111.06    8.73
   1 -10  -5   95.90    9.93
  -1 -10   5  102.83    6.45
  -1  10   5  113.72   11.38
   0 -10  -5    1.45    5.39
   0 -10  -5   -0.84    4.78
   0 -10   5    3.28    4.12
   0  10   5    4.12    5.64
  -1 -10  -5   63.39    9.15
  -1 -10  -5   85.41    9.78
   1 -10   5   77.56    9.21
   1  10   5   98.62   11.27
  -1  10  -5   86.52    8.89
  -2 -10  -5   78.70   10.00
   2 -10   5   74.86    9.61
  -2  10  -5   77.92    8.22
   2  10   5   61.15    8.91
   3 -10   5   42.33    7.73
  -3 -10  -5   59.87    9.27
  -3  10  -5   57.20    6.89
   3  10   5   56.55    7.92
   3  10   5   42.83    8.04
   4 -10   5   59.07    9.71
  -4 -10  -5   78.08   10.27
   4  10   5   57.64    9.15
  -4  10  -5   74.49    7.10
   4  10   5   87.60   10.44
   5 -10   5    5.26    5.99
   5  10   5    4.99    5.53
   5  10   5    3.56    6.48
   6 -10   5   12.81    7.49
   6  10   5    9.28    6.64
   6  10   5    7.89    7.31
   7 -10   5   24.96    9.52
   7  10   5   30.35    9.71
   7  10   5   29.87    8.25
   8 -10   5   14.98    9.29
   8  10   5   15.40    9.84
   8  10   5   20.23    8.63
   9 -10   5    3.30    8.51
   9  10   5   -8.65    6.77
   9  10   5   -3.18    7.91
  10 -10   5   33.66   11.03
  10 -10   5   23.13   10.13
  10  10   5   13.04   11.00
  10  10   5   25.37    9.86
  10 -11  -5   11.44   10.22
  10 -11  -5   11.64    9.13
  10 -11  -5    3.67    8.18
  10  11  -5    8.76   10.80
  10  11  -5   12.31    8.56
   9 -11  -5    0.99    7.71
   9 -11  -5    1.79    7.33
   9 -11  -5   -3.08    9.14
   9  11  -5  -11.25    8.26
   9  11  -5    0.33    8.11
   8 -11  -5   -0.61    5.92
   8 -11  -5   -1.31    6.97
   8 -11  -5   -0.24    7.46
   8  11  -5    1.82    8.02
   8  11  -5   -5.62    8.34
   7 -11  -5   45.62   11.33
   7 -11  -5   63.92   10.78
   7 -11  -5   55.13    8.71
   7  11  -5   37.86   10.44
   6 -11  -5  135.94   14.80
   6 -11  -5  162.41   15.16
   6  11  -5  117.68   13.72
   5 -11  -5    6.74    6.83
   5 -11  -5   -5.37    5.71
   5  11  -5    2.44    6.01
   4 -11  -5  159.82   14.28
   4 -11  -5  202.12   14.31
  -4  11   5  172.05   13.23
   4  11  -5  195.56   14.76
   3 -11  -5  445.72   22.34
   3 -11  -5  409.94   21.72
   3 -11  -5  453.71   21.33
  -3  11   5  414.19   21.28
   3  11  -5  418.54   21.86
  -2 -11   5  166.05   10.72
   2 -11  -5  163.54   14.50
  -2 -11   5  171.53    8.96
   2 -11  -5  181.42   13.68
  -2  11   5  169.98   13.10
   1 -11  -5   64.58    9.09
  -1 -11   5   40.65    6.47
  -1 -11   5   55.08    5.38
   1 -11  -5   36.61    7.62
  -1  11   5   61.43    9.26
   0 -11   5   79.51    8.93
   0 -11  -5   89.26   10.49
   0 -11  -5   77.75   10.28
   0  11   5   80.81   10.58
   1 -11   5  233.82   14.45
  -1 -11  -5  215.83   15.27
  -1 -11  -5  241.07   15.07
   1  11   5  240.01   14.94
  -2 -11  -5   90.38   11.13
   2 -11   5   77.48   10.31
   2  11   5   78.85   10.46
   3 -11   5   -2.01    4.63
  -3 -11  -5    6.80    6.08
   3  11   5    9.35    6.22
  -3  11  -5    3.19    4.14
  -4 -11  -5  148.81   14.04
   4 -11   5  141.33   14.32
   4  11   5  104.56   11.95
   4  11   5  135.03   12.82
   5 -11   5   44.23    9.34
   5  11   5   73.67   10.35
   5  11   5   60.00   10.58
   6 -11   5    1.59    6.08
   6  11   5   -3.66    6.03
   6  11   5    8.59    7.75
   7 -11   5   18.04    8.94
   7  11   5    9.55    7.43
   7  11   5   10.27    8.66
   8 -11   5   50.91   11.57
   8  11   5   50.14   11.95
   8  11   5   51.88   10.50
   9 -11   5   56.83   13.14
   9  11   5   90.60   15.15
   9  11   5   97.50   14.13
  10  11   5    8.24    9.07
  10 -12  -5    2.27    8.72
  10 -12  -5    6.25   11.25
  10  12  -5    9.66    8.61
  10  12  -5   19.78   10.85
   9 -12  -5   21.18   10.73
   9 -12  -5    8.35    8.81
   9 -12  -5    7.41    7.83
   9  12  -5   -8.17    8.09
   8 -12  -5   29.27    8.80
   8 -12  -5   31.86   10.90
   8 -12  -5   43.10   11.03
   8  12  -5   44.89   11.38
   7 -12  -5   -4.50    6.40
   7 -12  -5   -1.78    8.61
   7  12  -5    0.19    7.94
   6 -12  -5    8.07    7.01
   6 -12  -5   16.81    7.65
   6  12  -5   16.15    4.95
   6  12  -5   19.93    8.42
   5 -12  -5   19.45    7.32
   5 -12  -5   14.26    7.48
   5  12  -5   13.25    5.33
   5  12  -5    8.29    7.19
   4 -12  -5  105.46   12.57
   4 -12  -5   72.57   10.44
  -4  12   5   98.13   12.12
   4  12  -5   68.31   10.60
   3 -12  -5   24.02    7.36
   3 -12  -5   14.31    7.25
   3 -12  -5    9.54    6.29
  -3  12   5   40.64    8.74
   3  12  -5   16.73    6.62
   2 -12  -5   21.28    7.00
   2 -12  -5   38.24    7.08
  -2 -12   5   35.43    5.05
   2 -12  -5   36.87    8.32
  -2  12   5   25.92    7.24
   1 -12  -5   17.87    7.19
  -1 -12   5   27.84    4.47
   1 -12  -5   11.25    6.41
  -1 -12   5    7.31    4.94
  -1  12   5   20.18    7.33
   0 -12  -5   87.59   10.64
   0 -12   5   76.36    9.20
   0 -12  -5   66.16    9.52
   0  12   5  104.37   11.81
   1 -12   5   25.28    6.52
  -1 -12  -5   29.32    7.75
  -1 -12  -5   45.38    8.58
   1  12   5   47.22    8.87
   2 -12   5   86.39   10.38
  -2 -12  -5  123.94   13.12
   2  12   5   96.71   11.45
  -3 -12  -5   15.33    6.71
   3 -12   5   42.11    9.13
   3  12   5   30.96    7.68
  -3  12  -5   42.49    7.19
   4 -12   5    1.66    6.42
  -4 -12  -5    0.13    6.20
   4  12   5    8.73    6.58
   5 -12   5   26.94    9.32
   5  12   5   32.58    8.90
   5  12   5   24.30    7.53
   6 -12   5   39.49   10.64
   6  12   5   23.72    9.49
   6  12   5   41.31    9.31
   7 -12   5   31.41   10.34
   7  12   5   24.15    8.83
   7  12   5   30.17   10.48
   8 -12   5   -2.61    8.37
   8  12   5   -4.75    8.47
   8  12   5   -1.11    7.42
   9 -12   5   -9.08    7.44
   9  12   5    7.52    8.32
   9  12   5   -8.75    8.82
   9 -13  -5   20.29   10.76
   9 -13  -5   14.61    9.08
   9  13  -5   17.22   10.00
   8 -13  -5   -5.78    7.34
   8 -13  -5   -8.42    6.09
   8 -13  -5   -4.08    8.69
   8  13  -5    8.43    8.87
   7 -13  -5   33.52    9.96
   7 -13  -5   76.99   13.64
   7  13  -5   38.74   11.06
   6 -13  -5   81.88   13.01
   6 -13  -5   43.85   10.11
   6  13  -5   60.38   11.68
   6  13  -5   84.48    8.81
   5 -13  -5   17.07    8.20
   5 -13  -5   13.94    7.83
   5  13  -5   18.70    8.31
   5  13  -5   10.24    5.48
   4 -13  -5    9.60    7.47
   4 -13  -5   13.81    7.24
  -4  13   5    9.71    6.99
   4  13  -5   18.45    7.78
   3 -13  -5   47.28   10.11
   3 -13  -5   47.98    9.79
   3 -13  -5   49.99    8.69
  -3  13   5   41.28    8.45
   2 -13  -5    4.83    6.31
   2 -13  -5    8.65    5.86
   2 -13  -5    0.03    6.46
  -2  13   5    1.18    6.42
   1 -13  -5   33.08    8.73
  -1 -13   5   24.71    6.43
   1 -13  -5   19.57    7.47
  -1  13   5   18.62    7.55
   0 -13  -5   59.49    9.46
   0 -13   5   82.65   10.26
   0 -13  -5   87.33   11.94
   0  13   5   97.02   12.28
  -1 -13  -5   50.12    9.06
  -1 -13  -5   80.65   11.05
   1 -13   5   85.04   10.85
   1  13   5   67.54   10.34
   2 -13   5    3.96    6.06
  -2 -13  -5    5.72    6.72
  -2 -13  -5    2.89    5.27
   2  13   5   10.95    6.59
  -3 -13  -5    8.64    6.79
   3 -13   5   -9.21    5.41
   3  13   5   -6.50    6.01
   4 -13   5   10.43    7.10
   4  13   5   14.94    7.61
   5 -13   5   34.90   10.07
   5  13   5   40.99    9.18
   6 -13   5    3.88    7.84
   6  13   5   16.83    8.91
   6  13   5   12.23    7.81
   7 -13   5   -3.93    7.45
   7  13   5   -6.71    7.83
   7  13   5   10.41    8.22
   8 -13   5   -0.93    8.20
   8  13   5    9.70    8.17
   8  13   5   -1.95    9.33
   9 -13   5    7.41    9.25
   9  13   5   -9.83    9.23
   9  13   5    8.74    8.85
   9 -14  -5   97.00   17.14
   9 -14  -5  119.85   16.52
   9  14  -5  116.10   16.89
   8 -14  -5    0.46    9.17
   8 -14  -5   37.15   10.50
   8  14  -5    4.71    9.65
   7 -14  -5    5.85    8.25
   7 -14  -5  -14.19    7.39
   7  14  -5   -1.81    7.78
   6 -14  -5   46.82   11.44
   6 -14  -5   40.39   10.42
   6  14  -5   55.07   11.18
   5 -14  -5  295.96   20.46
   5 -14  -5  365.04   21.38
   5  14  -5  323.34   21.45
   5  14  -5  322.03   17.32
   4 -14  -5  154.40   14.72
   4 -14  -5   84.96   11.79
   4  14  -5   97.22   12.24
  -4  14   5  123.55   13.75
   3 -14  -5    1.99    6.71
   3 -14  -5   -9.03    6.15
   3 -14  -5   -3.59    5.90
  -3  14   5    1.33    6.40
   2 -14  -5   48.07   10.12
   2 -14  -5   61.39    9.80
   2 -14  -5   56.60    9.18
  -2  14   5   59.95   10.50
   1 -14  -5  243.51   17.01
   1 -14  -5  229.01   17.46
  -1  14   5  271.05   18.15
   0 -14  -5   30.33    9.11
   0 -14   5   21.15    6.75
   0 -14  -5   24.26    7.50
   0  14   5   32.30    9.14
   1 -14   5  152.64   14.26
  -1 -14  -5  145.28   15.06
  -1 -14  -5  110.99   12.69
   1  14   5  118.59   13.94
  -2 -14  -5  131.54   13.94
  -2 -14  -5  152.38   15.37
   2 -14   5  117.02   12.86
   2  14   5  137.67   14.05
   3 -14   5   12.25    7.49
  -3 -14  -5   12.82    7.38
   3  14   5    3.06    6.61
   4 -14   5   19.86    8.52
   4  14   5    0.71    7.01
   5 -14   5    9.19    7.95
   5  14   5   11.85    7.89
   6 -14   5  103.27   15.12
   6  14   5   82.50   12.70
   7 -14   5   34.30   11.51
   7  14   5   32.58   11.37
   7  14   5   46.01   10.67
   8 -14   5    7.68    9.06
   8  14   5    4.06   10.04
   8  14   5    8.04    9.13
   8 -15  -5   18.80   11.00
   8 -15  -5    4.47    8.98
   8  15  -5   27.62   11.55
   7 -15  -5    5.16    7.97
   7 -15  -5    0.76    8.91
   7  15  -5   -1.22    8.24
   6 -15  -5   45.28   11.11
   6 -15  -5   39.47   11.40
   6  15  -5   44.68   10.76
   5 -15  -5    6.21    7.80
   5 -15  -5   12.27    7.97
   5  15  -5    6.65    7.70
   4 -15  -5   17.11    8.31
   4 -15  -5   17.06    7.60
  -4  15   5   17.09    7.66
   4  15  -5    1.24    6.71
   3 -15  -5    4.30    7.19
   3 -15  -5   11.56    7.05
   3 -15  -5   -3.29    6.37
  -3  15   5    9.09    7.57
   2 -15  -5   26.80    7.65
   2 -15  -5   14.01    8.09
   2 -15  -5    4.52    6.94
  -2  15   5    0.22    6.82
   1 -15  -5    7.59    6.88
   1 -15  -5    1.76    7.10
  -1  15   5   15.27    7.78
   0 -15  -5   44.89   10.29
   0 -15  -5   54.28    9.41
   0 -15   5   66.33   10.56
   0  15   5   30.11    8.91
  -1 -15  -5   33.89    9.01
  -1 -15  -5   15.13    7.22
   1 -15   5   30.80    8.60
   1  15   5   21.63    8.23
   2 -15   5   28.38    8.65
  -2 -15  -5   42.87    9.59
  -2 -15  -5   54.81   10.97
   2  15   5   45.85   10.21
  -3 -15  -5    9.73    7.48
   3 -15   5   -1.93    7.12
   3  15   5   -1.22    7.08
   4 -15   5   39.96   10.35
   4  15   5   31.63    8.84
   5 -15   5   37.49   11.06
   5  15   5   25.67    8.98
   6 -15   5    2.40    8.19
   6  15   5   11.39    8.42
   7 -15   5    5.92    9.19
   7  15   5  -10.22    7.48
   8 -15   5   -4.98    8.84
   8  15   5  -12.59    7.67
   8  15   5   -0.56    9.10
   8 -16  -5   26.79   11.93
   8 -16  -5   28.97   10.80
   8  16  -5   15.25   10.88
   7 -16  -5    6.91    8.35
   7 -16  -5    6.78    9.94
   7  16  -5   -6.02    7.91
   6 -16  -5  -11.69    7.25
   6 -16  -5   -3.14    7.64
   6  16  -5   18.02    8.70
   5 -16  -5    9.25    8.46
   5 -16  -5   20.30    9.01
   5  16  -5   38.33   10.82
   4 -16  -5   33.36   10.27
   4 -16  -5   46.67   10.14
  -4  16   5   30.88    9.64
   3 -16  -5   16.39    8.96
   3 -16  -5   10.14    7.18
   3 -16  -5    0.79    7.08
  -3  16   5    0.22    6.42
   2 -16  -5   23.56    9.38
   2 -16  -5   36.26    8.31
   2 -16  -5   13.68    8.17
  -2  16   5   24.70    9.81
   1 -16  -5   27.90    8.91
   1 -16  -5   25.44    8.76
   1 -16  -5   31.92    8.00
  -1  16   5   27.29    9.77
   0 -16  -5   16.96    7.90
   0 -16  -5    2.61    6.73
   0  16   5    8.77    8.45
   1 -16   5   53.30   10.23
  -1 -16  -5   27.43    9.33
  -1 -16  -5   41.41    9.75
   1  16   5   30.31    8.98
  -2 -16  -5   15.50    7.81
  -2 -16  -5    8.08    8.13
   2 -16   5   13.10    7.88
   2  16   5   10.47    8.24
   3 -16   5    1.14    7.66
  -3 -16  -5   17.54    8.39
   3  16   5   17.50    8.13
   4 -16   5   10.03    9.05
   4  16   5   10.03    8.08
   5 -16   5    9.65    8.70
   5  16   5    1.16    7.38
   6 -16   5    5.86    9.06
   6  16   5    8.46    8.10
   7 -16   5    0.13    8.77
   7  16   5    1.67    8.35
   7 -17  -5   70.48   13.77
   7 -17  -5   86.66   14.09
   7  17  -5   71.39   13.99
   6 -17  -5   17.37    9.83
   6 -17  -5   14.73    9.41
   6  17  -5   26.16    9.75
   5 -17  -5   10.24    8.85
   5 -17  -5    5.03    8.52
   5  17  -5    6.73    7.98
   4 -17  -5    5.57    8.10
   3 -17  -5  125.66   15.34
   3 -17  -5  142.06   17.14
  -3  17   5  182.32   19.39
   2 -17  -5  155.69   17.61
   2 -17  -5  150.12   16.91
  -2  17   5  133.99   17.03
   1 -17  -5   -7.65    7.25
   1 -17  -5    1.55    7.27
  -1  17   5    7.14    7.86
   0 -17  -5  101.04   13.26
   0 -17  -5   66.49   12.38
   0  17   5  104.26   15.23
   1 -17   5  252.02   18.97
  -1 -17  -5  283.52   19.54
  -1 -17  -5  297.83   20.62
   1  17   5  258.15   20.34
   2 -17   5  101.77   14.34
  -2 -17  -5   99.96   14.25
  -2 -17  -5   87.44   13.00
   2  17   5   92.92   14.14
  -3 -17  -5    8.19    8.16
   3 -17   5   13.67    8.66
   3  17   5   15.48    8.29
   4 -17   5  106.36   14.52
   4  17   5  124.65   15.45
   5 -17   5  100.44   14.40
   5  17   5  101.13   14.38
   6 -17   5   -8.63    8.19
   6  17   5    2.00    7.79
   7 -17   5   51.52   13.27
   7  17   5   40.51   11.57
   7 -18  -5   -0.77    8.74
   6 -18  -5   13.47    9.36
   6  18  -5   14.92   10.19
   5 -18  -5    5.79    9.46
   5  18  -5   15.12    8.67
   4 -18  -5   20.82    9.94
   3 -18  -5   23.10   10.06
   3 -18  -5   -7.53    7.71
  -3  18   5    4.78    8.23
   2 -18  -5  -10.19    7.55
   2 -18  -5   -5.11    7.08
  -2  18   5    4.78    8.19
   1 -18  -5    9.58    7.99
   1 -18  -5   35.68   10.28
  -1  18   5   32.52   10.44
   0 -18  -5   14.16    8.95
   0 -18  -5    8.83    8.06
   0  18   5    2.23    8.08
  -1 -18  -5   19.38    9.03
  -1 -18  -5   20.91    9.15
   1  18   5   21.02    8.76
   2 -18   5    6.16    8.44
  -2 -18  -5   12.47    8.80
   2  18   5    8.91    8.60
  -3 -18  -5    0.89    7.79
   3 -18   5    3.02    8.54
   3  18   5    6.44    8.38
  -4 -18  -5   40.60   11.17
   4 -18   5   36.37   11.21
   4  18   5   13.66    9.34
   5 -18   5   10.65    9.47
   5  18   5    6.68    8.64
   6 -18   5    6.58    8.84
   6  18   5    4.64    8.77
   6 -19  -5   -5.10    8.39
   6  19  -5    4.45    8.70
   5 -19  -5    2.34    9.23
   5  19  -5    9.89    8.68
   4 -19  -5   -4.30    8.82
   3 -19  -5   16.08   10.81
   3 -19  -5   13.03    9.87
  -3  19   5   14.61    9.38
   2 -19  -5   28.45   11.22
   2 -19  -5    6.71    9.65
  -2  19   5   11.81    9.02
   1 -19  -5    0.22    8.97
   1 -19  -5    2.57    8.35
  -1  19   5   15.73   10.07
   0 -19  -5    3.28    8.01
   0 -19  -5    2.67    8.79
   0  19   5    1.07    7.95
  -1 -19  -5   -1.79    7.75
  -1 -19  -5    6.68    9.30
   1  19   5   10.04    8.61
  -2 -19  -5   25.10    9.85
   2  19   5   20.81    9.37
   3 -19   5    3.61    8.80
  -3 -19  -5   -3.95    7.87
   3  19   5    5.71    8.93
   4 -19   5    9.10    8.79
  -4 -19  -5    0.10    8.55
   4  19   5   16.39    9.38
   5 -19   5   -6.63    8.76
   5  19   5   -7.64    7.54
   5 -20  -5   64.88   14.31
   5  20  -5   53.41   13.00
   4 -20  -5   24.04   10.81
   3 -20  -5   19.62   10.33
   3 -20  -5    3.32    9.84
  -3  20   5   -1.87    9.12
   2 -20  -5   66.71   14.27
   2 -20  -5   76.95   14.21
  -2  20   5   73.10   14.55
   1 -20  -5  110.42   16.04
   1 -20  -5  114.98   16.60
  -1  20   5  123.36   17.06
   0 -20  -5   36.99   11.25
   0 -20  -5   49.06   12.33
   0  20   5   53.14   13.31
  -1 -20  -5    0.75    8.26
   1  20   5    8.50    9.73
  -2 -20  -5   23.56   10.75
   2  20   5   28.24   11.14
   3 -20   5   96.48   15.42
  -3 -20  -5  116.12   16.14
   3  20   5  107.02   15.62
   4 -20   5    0.18    8.92
  -4 -20  -5   15.09   10.17
   4  20   5  -11.09    8.36
   3 -21  -5   15.82   11.42
  -3  21   5   35.48   12.19
   2 -21  -5    1.96    9.10
   2 -21  -5    8.26    9.75
  -2  21   5   13.26    9.16
   1 -21  -5   12.84   10.22
   1 -21  -5    4.72    8.83
  -1  21   5   11.08    9.37
   0 -21  -5   17.90   10.34
   0 -21  -5   -3.14    8.76
   0  21   5   -4.40    8.01
  -1 -21  -5   26.24   10.48
   1  21   5   17.12   10.95
  -2 -21  -5   -0.45    8.90
   2  21   5   22.34   10.93
  -3 -21  -5   18.55    9.81
   3  21   5    4.21    8.99
   1 -22  -5    7.57   10.27
   1 -22  -5    2.26    9.45
  -1  22   5  -27.40    7.46
   0 -22  -5   -3.18    8.47
   0  22   5   -6.15    8.25
  -1 -22  -5    3.01    9.85
   1  22   5   12.81   10.41
  11   0  -6   49.55   12.88
  11   0  -6   29.40   11.15
  10   0  -6   33.66   11.11
  10   0  -6   40.66   11.23
   9   0  -6    0.27    7.61
   9   0  -6   14.28    8.29
   8   0  -6   57.56   10.06
   8   0  -6   61.31    9.28
   8   0  -6   47.42   11.18
   7   0  -6   23.75    7.17
   7   0  -6   18.90    6.39
   7   0  -6   17.90    7.39
   6   0  -6  182.52   14.02
   6   0  -6  212.32   13.54
   6   0  -6  193.72   12.46
   6   0  -6  200.35    8.12
   6   0  -6  204.36    8.13
   5   0  -6  224.79    8.93
   5   0  -6  212.54   13.25
   5   0  -6  208.45   13.78
   5   0  -6  212.56    8.67
   5   0  -6  212.49   12.09
   4   0  -6  721.86   26.04
   4   0  -6  701.59   27.83
   4   0  -6  688.63   24.02
   4   0  -6  672.86   28.15
   4   0  -6  711.06   24.00
   3   0  -6  546.91   19.29
   3   0  -6  533.46   19.86
   3   0  -6  534.76   19.40
   3   0  -6  566.33   22.49
  -3   0   6  510.02   18.67
   3   0  -6  527.54   22.21
  -2   0   6  194.08    8.78
   2   0  -6  154.65   10.56
   2   0  -6  179.29    9.16
  -1   0   6   -0.81    2.90
   1   0  -6    2.65    3.48
   1   0  -6    4.48    2.82
   1   0  -6    2.85    4.42
   0   0   6  275.94   12.61
   0   0  -6  266.49   13.08
  -1   0  -6  629.89   24.78
   1   0   6  640.47   24.52
   2   0   6  282.44   14.24
  -2   0  -6  301.01   14.85
  -3   0  -6   50.31    7.43
   3   0   6   38.50    6.42
   4   0   6  551.87   23.47
  -4   0  -6  508.14   22.67
   4   0   6  528.83   21.74
  -5   0  -6  254.38   14.96
   5   0   6  232.75   14.02
   5   0   6  230.68   14.62
   6   0   6   45.42    8.16
  -6   0  -6   61.46    9.51
   6   0   6   46.14    8.22
   7   0   6  179.05   14.20
   7   0   6  197.09   14.79
   8   0   6   68.22   11.61
   8   0   6  100.92   12.31
   9   0   6   53.33   10.44
   9   0   6   70.80   13.26
  10   0   6    8.58    8.12
  10   0   6   23.02   10.49
  11   0   6   18.43   10.94
  11   0   6    3.26    8.01
  11  -1  -6    5.00    9.98
  11  -1  -6    6.87   10.05
  11   1  -6    8.09   10.61
  11   1  -6    6.89   10.80
  10  -1  -6   11.09    9.99
  10  -1  -6   -8.35    7.11
  10   1  -6   -1.95    8.83
  10   1  -6    0.51    8.83
   9  -1  -6  101.04   13.51
   9  -1  -6  104.92   14.80
   9   1  -6  109.88   13.77
   9   1  -6  114.39   15.27
   8  -1  -6   66.60   11.16
   8  -1  -6   58.74    9.55
   8  -1  -6   57.38    4.90
   8   1  -6   75.56   11.23
   8   1  -6   64.06   11.70
   8   1  -6   76.64    9.86
   7  -1  -6    0.62    6.87
   7  -1  -6   16.40    6.39
   7  -1  -6   16.29    3.13
   7   1  -6   16.86    6.25
   7   1  -6   10.05    6.46
   7   1  -6   16.37    6.81
   6  -1  -6   23.88    7.11
   6  -1  -6   38.24    7.19
   6  -1  -6   37.38    4.10
   6  -1  -6   54.17    7.71
   6   1  -6   48.63    8.23
   6   1  -6   31.99    7.24
   6   1  -6   21.75    6.68
   5  -1  -6  211.09   13.81
   5  -1  -6  197.40   12.94
   5  -1  -6  205.87   11.38
   5  -1  -6  208.20    8.96
   5  -1  -6  196.86    9.16
   5   1  -6  203.94    7.73
   5   1  -6  209.89   12.11
   5   1  -6  198.96   13.22
   5   1  -6  196.44   13.21
   5   1  -6  204.64    7.61
   4  -1  -6  239.01   11.70
   4  -1  -6  239.12   13.86
   4  -1  -6  259.58   14.53
   4  -1  -6  245.19   10.82
   4  -1  -6  245.80   10.48
   4   1  -6  265.73   14.14
   4   1  -6  236.37   12.53
   4   1  -6  260.80   14.35
   4   1  -6  250.44    9.65
   4   1  -6  263.09    9.85
   3  -1  -6   51.54    5.18
   3  -1  -6   39.46    6.47
   3  -1  -6   54.12    5.28
   3  -1  -6   59.57    5.07
   3  -1  -6   39.02    6.58
   3   1  -6   48.57    6.03
   3   1  -6   41.30    6.59
   3   1  -6   46.78    4.52
   3   1  -6   58.97    4.56
   3   1  -6   44.84    7.03
  -3   1   6   40.98    4.38
  -2  -1   6    3.28    2.59
   2  -1  -6    0.36    3.19
  -2   1   6    1.38    2.87
   2   1  -6    4.25    4.56
   2   1  -6    2.31    2.94
   2   1  -6    2.63    2.61
   1  -1  -6  118.74    8.22
   1  -1  -6  122.16    7.31
  -1  -1   6  121.77    7.31
   1   1  -6  137.97    9.02
   1   1  -6  128.60    8.11
  -1   1   6  126.87    7.98
   1   1  -6  122.96    6.17
   0  -1  -6   34.52    5.50
   0  -1   6   47.22    5.56
   0   1  -6   31.12    5.34
   0   1   6   40.59    5.08
   1  -1   6   14.92    4.72
  -1  -1  -6    7.56    5.14
   1   1   6    8.89    4.52
   2  -1   6  210.02   11.86
  -2  -1  -6  240.64   12.88
   2   1   6  210.72   11.86
  -3  -1  -6   44.44    6.81
   3  -1   6   73.65    8.64
   3   1   6   61.10    7.48
   3   1   6   65.56    6.65
   4  -1   6   19.30    5.55
  -4  -1  -6   22.05    6.39
   4   1   6   26.36    5.49
   4   1   6   20.83    5.99
   5  -1   6   23.01    5.97
  -5  -1  -6   17.53    6.05
   5  -1   6   19.84    5.88
   5   1   6   32.14    7.13
   5   1   6   31.67    6.66
  -6  -1  -6   97.15   10.87
   6  -1   6   70.17    9.96
   6  -1   6   81.41   10.22
   6   1   6   79.95   10.44
  -6   1  -6  101.81   11.18
   6   1   6   97.98   10.90
   7  -1   6    5.26    5.97
   7  -1   6    5.37    7.04
   7   1   6    1.56    5.74
   7   1   6   -1.58    6.37
   8  -1   6    1.13    6.34
   8  -1   6   -1.12    6.94
   8   1   6    6.36    6.79
   8   1   6    0.41    6.38
   9  -1   6   -8.10    7.67
   9  -1   6    0.71    6.76
   9   1   6   -0.30    6.24
   9   1   6    4.18    8.45
  10  -1   6    2.90    8.27
  10  -1   6   24.56    9.05
  10   1   6    7.67    8.08
  10   1   6   12.93    8.90
  11  -1   6   19.22   11.71
  11  -1   6    9.80    9.18
  11   1   6   11.14    8.86
  11   1   6   29.92   12.03
  11  -2  -6   -9.77    8.18
  11  -2  -6   10.93    9.78
  11   2  -6  -12.88    7.84
  11   2  -6   -2.26    9.71
  10  -2  -6   -5.61    9.15
  10  -2  -6   -3.09    7.62
  10   2  -6    5.00    9.47
  10   2  -6   -1.38    8.84
   9  -2  -6   -5.55    7.91
   9  -2  -6    4.91    3.27
   9  -2  -6   -7.61    6.43
   9   2  -6    1.36    5.42
   9   2  -6   -5.22    7.56
   9   2  -6    2.01    7.99
   8  -2  -6    6.06    7.68
   8  -2  -6    6.06    6.35
   8  -2  -6   10.41    3.53
   8   2  -6   11.07    8.09
   8   2  -6   10.94    6.32
   8   2  -6   10.23    7.59
   7  -2  -6   63.71    8.91
   7  -2  -6   80.96    6.66
   7  -2  -6   69.10   10.83
   7   2  -6   85.60   11.16
   7   2  -6   68.97   11.21
   7   2  -6   96.02   10.65
   6  -2  -6  230.45   12.86
   6  -2  -6  217.63   14.90
   6  -2  -6  209.23   10.40
   6   2  -6  210.69   13.92
   6   2  -6  252.63   15.21
   6   2  -6  201.32   13.67
   5  -2  -6   37.09    7.59
   5  -2  -6   49.45    6.24
   5  -2  -6   48.51    4.75
   5  -2  -6   49.50    5.23
   5   2  -6   43.10    7.20
   5   2  -6   47.96    7.60
   5   2  -6   41.96    7.49
   4  -2  -6   16.92    3.84
   4  -2  -6   14.61    3.12
   4  -2  -6    6.66    4.61
   4  -2  -6   13.31    3.79
   4   2  -6   16.66    5.01
  -4   2   6   14.74    3.20
   4   2  -6   12.71    2.30
   4   2  -6   19.30    5.69
   4   2  -6   22.65    5.51
   4   2  -6   18.28    2.31
   3  -2  -6  368.65   13.89
   3  -2  -6  359.76   14.96
   3  -2  -6  344.25   17.16
   3   2  -6  328.00   16.52
   3   2  -6  337.77   16.21
   3   2  -6  362.26   13.66
   3   2  -6  376.60   15.52
   3   2  -6  375.90   13.50
  -3   2   6  358.90   14.10
   2  -2  -6   78.27    4.43
   2  -2  -6   83.55    7.19
  -2  -2   6   82.85    5.43
   2  -2  -6   79.65    6.87
  -2   2   6   80.07    6.40
   2   2  -6   83.69    5.78
   2   2  -6   82.52    8.42
   1  -2  -6  316.94   14.00
  -1  -2   6  320.85   13.01
   1  -2  -6  300.99   13.04
   1   2  -6  277.90   14.03
  -1   2   6  303.41   13.66
   0  -2  -6  240.15   12.33
   0  -2   6  222.23   11.10
   0   2   6  221.62    7.82
   0   2   6  214.13   11.12
   0   2  -6  209.79   11.67
   1  -2   6  142.34    9.49
  -1  -2  -6  139.22   10.19
  -1   2  -6  156.31    8.93
   1   2   6  162.08    9.91
   1   2   6  142.16    6.81
   2  -2   6  118.57    8.85
  -2  -2  -6  113.00    9.72
   2   2   6  117.61    7.22
   2   2   6  115.63    8.79
  -3  -2  -6   11.80    5.30
   3  -2   6   20.63    5.82
   3   2   6    7.71    3.90
   3   2   6   10.64    4.78
   4  -2   6  126.46    9.98
  -4  -2  -6  122.29   10.63
   4   2   6  123.33    9.16
   4   2   6  135.77   10.67
  -5  -2  -6  294.75   15.60
   5  -2   6  265.88   15.35
   5   2   6  261.29   15.46
   5   2   6  272.93   14.75
   6  -2   6   -3.91    5.29
   6  -2   6    7.25    5.67
  -6  -2  -6    1.21    5.30
   6   2   6    7.84    5.48
   6   2   6    3.47    5.50
   7  -2   6   63.73   10.03
   7  -2   6   58.78   10.10
   7   2   6   52.05    9.09
   7   2   6   85.00   11.30
   8  -2   6   66.76   10.60
   8  -2   6   64.07   11.62
   8   2   6   44.70    9.69
   8   2   6   57.29    9.67
   9  -2   6   15.93    9.14
   9  -2   6   26.90    8.90
   9   2   6   14.60    7.99
   9   2   6   28.67    9.74
  10  -2   6  -15.23    6.48
  10  -2   6   11.34    8.66
  10   2   6   -3.45    8.36
  10   2   6   11.99    8.16
  11  -2   6    9.16   10.03
  11  -2   6    8.21    8.16
  11   2   6    0.97    9.22
  11   2   6   18.53    8.95
  11  -3  -6   52.10   12.44
  11  -3  -6   49.47   14.09
  11   3  -6   43.97   13.29
  11   3  -6   76.29   14.28
  10  -3  -6    4.66    8.13
  10  -3  -6   10.42    9.18
  10   3  -6   12.25   10.01
  10   3  -6   13.25   10.21
   9  -3  -6   57.03   10.45
   9  -3  -6   55.41    6.39
   9  -3  -6   43.96   11.08
   9   3  -6   68.77    9.97
   9   3  -6   45.25   11.15
   9   3  -6   60.01   12.17
   8  -3  -6  149.48   16.56
   8  -3  -6  163.14    9.88
   8  -3  -6  192.82   14.35
   8   3  -6  185.09   15.46
   8   3  -6  162.06   15.82
   8   3  -6  213.43   18.20
   7  -3  -6   29.36    6.77
   7  -3  -6   19.57    4.64
   7  -3  -6   26.80    8.85
   7   3  -6   17.75    7.46
   7   3  -6   14.08    7.20
   7   3  -6   12.45    6.56
   6  -3  -6  114.49   10.15
   6  -3  -6  111.78    7.94
   6  -3  -6  111.30   12.29
   6   3  -6  120.98   11.73
   6   3  -6  107.85   11.27
   6   3  -6  124.61   12.31
   5  -3  -6  111.31   11.58
   5  -3  -6  117.51    8.36
   5  -3  -6  125.61    8.22
   5   3  -6  127.68   11.20
   5   3  -6  138.23   12.14
   5   3  -6  121.39   11.18
   4  -3  -6    4.12    3.43
   4  -3  -6   15.55    3.43
   4  -3  -6    3.75    3.08
   4  -3  -6    9.52    5.47
   4   3  -6    6.76    4.83
   4   3  -6   10.48    5.01
   4   3  -6   12.57    4.65
   4   3  -6    9.40    2.14
   4   3  -6   14.20    2.08
  -4   3   6   15.28    3.52
   3  -3  -6   16.32    4.26
   3  -3  -6   14.47    5.10
   3  -3  -6   15.96    3.03
  -3   3   6   19.17    4.06
   3   3  -6   12.01    4.29
   3   3  -6    9.42    4.93
   3   3  -6   16.36    2.82
   2  -3  -6  338.56   14.91
  -2  -3   6  332.11   13.21
   2  -3  -6  336.51   15.09
   2  -3  -6  349.23   11.77
   2   3  -6  345.55   13.63
   2   3  -6  341.63   16.01
  -2   3   6  332.57   14.55
  -1  -3   6  958.15   33.77
   1  -3  -6  962.01   34.96
   1  -3  -6 1001.43   34.14
   1   3  -6 1012.08   35.46
  -1   3   6  978.64   34.71
   0  -3  -6  748.14   27.88
   0  -3   6  747.58   26.85
   0  -3  -6  714.89   26.47
   0   3  -6  731.95   27.27
   0   3   6  716.32   27.46
   1  -3   6  169.22    9.82
  -1  -3  -6  191.99   11.46
  -1   3  -6  155.99    9.35
   1   3   6  160.70    7.38
   1   3   6  158.11   10.06
   2  -3   6  876.84   31.80
  -2  -3  -6  840.53   31.90
  -2   3  -6  805.07   29.27
   2   3   6  798.81   31.33
   2   3   6  852.84   28.83
   3  -3   6 1033.19   39.41
  -3  -3  -6 1095.83   39.58
   3   3   6 1094.95   39.54
   3   3   6 1063.82   37.12
  -4  -3  -6  220.76   13.08
   4  -3   6  205.84   12.67
   4   3   6  191.88   13.02
   4   3   6  194.28   11.57
  -5  -3  -6   52.27    7.98
   5  -3   6   56.07    8.78
   5   3   6   55.67    7.65
   5   3   6   44.41    7.51
   6  -3   6  237.38   15.56
  -6  -3  -6  263.14   15.67
   6   3   6  276.43   15.90
   6   3   6  246.11   15.53
   7  -3   6   20.19    8.09
   7  -3   6    9.38    6.48
   7   3   6   22.59    7.09
   7   3   6   13.81    7.48
   8  -3   6    0.50    6.37
   8  -3   6    7.93    7.09
   8   3   6    8.05    6.63
   8   3   6   -3.26    6.22
   9  -3   6   21.24    8.45
   9  -3   6   21.97    9.66
   9   3   6    0.49    7.61
   9   3   6   21.26    7.86
  10  -3   6    4.63    8.71
  10  -3   6   20.37    8.62
  10   3   6   21.42   10.45
  10   3   6   35.62    9.73
  11  -3   6   14.67    9.38
  11  -3   6   11.60   10.57
  11   3   6    4.50   10.21
  11   3   6    8.06    8.54
  11  -4  -6   20.22    9.72
  11  -4  -6   37.97   12.71
  11   4  -6   18.90   11.06
  11   4  -6   15.50   11.44
  10  -4  -6   50.58   10.99
  10  -4  -6   54.33   13.74
  10  -4  -6   62.55    7.41
  10   4  -6   65.54   12.62
  10   4  -6   45.37   12.72
   9  -4  -6    3.72    6.89
   9  -4  -6    4.92    4.25
   9  -4  -6    3.30    8.83
   9   4  -6    2.07    5.62
   9   4  -6    4.97    8.93
   9   4  -6    0.86    7.29
   8  -4  -6   40.51    8.18
   8  -4  -6   46.84    6.56
   8  -4  -6   39.29   10.56
   8   4  -6   35.97    9.27
   8   4  -6   52.05   10.74
   8   4  -6   51.12    9.24
   7  -4  -6   64.23    8.74
   7  -4  -6   69.57   11.02
   7  -4  -6   76.72    7.87
   7   4  -6   53.45    9.14
   7   4  -6   66.88   10.77
   7   4  -6   75.17   10.04
   6  -4  -6  117.97   12.56
   6  -4  -6  112.63    8.65
   6  -4  -6  125.05    9.50
   6   4  -6  127.09   12.56
   6   4  -6  105.75   10.93
   6   4  -6  111.27   11.72
   5  -4  -6    6.52    4.09
   5  -4  -6    7.77    4.07
   5  -4  -6    3.15    5.50
   5   4  -6    1.52    5.04
   5   4  -6    5.53    4.26
   5   4  -6   15.78    6.18
   4  -4  -6   39.94    5.78
   4  -4  -6   30.34    4.52
   4  -4  -6   32.49    7.31
   4   4  -6   23.60    6.19
  -4   4   6   29.04    4.81
   4   4  -6   22.16    5.07
   4   4  -6   23.79    6.03
   4   4  -6   39.25    3.21
   3  -4  -6   21.63    3.16
   3  -4  -6   18.05    4.75
   3   4  -6   21.34    5.92
   3   4  -6   20.12    3.11
   3   4  -6   18.72    4.21
  -3   4   6   21.09    4.22
   2  -4  -6   68.77    3.66
  -2  -4   6   70.85    5.65
   2  -4  -6   74.09    7.64
   2  -4  -6   74.41    7.50
  -2   4   6   74.29    7.00
   2   4  -6   91.92    9.16
   2   4  -6   71.82    5.48
  -1  -4   6    1.81    2.81
   1  -4  -6    3.65    4.24
   1  -4  -6    6.29    3.99
  -1   4   6   -3.63    3.61
   1   4  -6    4.69    4.37
   0  -4  -6  209.26   11.72
   0  -4   6  185.96   10.19
   0  -4  -6  193.54   10.63
   0   4  -6  169.88   10.57
   0   4   6  175.21   10.38
  -1  -4  -6    8.54    4.69
   1  -4   6   12.19    4.52
  -1   4  -6   10.62    4.20
   1   4   6    5.94    2.61
   1   4   6    9.06    4.67
   2  -4   6  236.36   13.17
  -2  -4  -6  209.98   12.81
   2   4   6  220.16   12.74
  -2   4  -6  245.48   11.27
   2   4   6  254.09   11.01
   3  -4   6   11.74    5.33
  -3  -4  -6   13.01    5.42
   3   4   6   16.95    4.33
  -3   4  -6   14.81    3.59
   3   4   6   14.36    5.61
  -4  -4  -6   15.32    5.99
   4  -4   6   19.78    6.35
   4   4   6   12.49    5.64
   4   4   6    9.95    4.72
   5  -4   6   34.24    7.51
  -5  -4  -6   31.83    7.00
   5   4   6   24.03    6.57
   5   4   6   28.87    6.25
   6  -4   6   11.11    6.22
  -6  -4  -6    6.01    5.97
   6   4   6   14.74    5.71
   6   4   6   14.89    6.33
   7  -4   6   15.44    7.17
   7  -4   6   20.02    7.68
   7   4   6   23.68    8.13
   7   4   6   24.28    7.30
   8  -4   6   54.49   11.49
   8  -4   6   37.82    8.80
   8   4   6   43.70   10.13
   8   4   6   47.32    9.19
   9  -4   6   76.98   13.80
   9  -4   6  105.24   13.71
   9   4   6   67.63   11.09
   9   4   6   86.73   14.02
  10  -4   6   -5.71    8.84
  10  -4   6    1.16    7.84
  10   4   6    4.89    7.83
  10   4   6    0.95    8.50
  11  -4   6    7.71    9.33
  11  -4   6    0.06    8.66
  11   4   6    5.64    8.26
  11   4   6   -0.44    9.15
  11  -5  -6   -1.78    8.30
  11  -5  -6   19.55   10.66
  11   5  -6   -5.94    7.80
  11   5  -6  -14.73    8.54
  10  -5  -6    6.58    7.56
  10  -5  -6   -2.69    9.42
  10  -5  -6   -3.58    4.65
  10   5  -6  -14.31    6.27
  10   5  -6   -5.23    9.33
   9  -5  -6   52.46    9.90
   9  -5  -6   35.96    6.80
   9  -5  -6   53.08   12.88
   9   5  -6   31.70    8.95
   9   5  -6   66.19   11.70
   9   5  -6   20.25   10.18
   8  -5  -6   56.72    9.00
   8  -5  -6   43.09    7.11
   8  -5  -6   38.85   10.64
   8   5  -6   44.78    9.04
   8   5  -6   40.06   10.26
   8   5  -6   49.54    9.34
   7  -5  -6   18.00    5.63
   7  -5  -6    5.11    5.51
   7  -5  -6   11.08    7.27
   7   5  -6   15.70    6.98
   7   5  -6   12.66    6.45
   7   5  -6   19.80    7.79
   6  -5  -6   12.66    4.99
   6  -5  -6    5.31    4.30
   6  -5  -6    6.14    6.00
   6   5  -6    2.63    4.51
   6   5  -6    9.82    6.60
   6   5  -6    3.03    5.72
   5  -5  -6   28.26    7.26
   5  -5  -6   28.49    5.91
   5  -5  -6   26.10    5.03
   5   5  -6   38.00    7.70
   5   5  -6   36.69    7.78
   5   5  -6   29.28    5.78
   4  -5  -6   30.05    5.70
   4  -5  -6   32.02    4.33
   4  -5  -6   37.49    7.53
   4   5  -6   31.14    5.48
   4   5  -6   30.52    3.29
  -4   5   6   26.86    5.02
   4   5  -6   31.39    6.69
   4   5  -6   29.09    6.41
   3  -5  -6  135.42    6.69
   3  -5  -6  137.27   10.33
   3  -5  -6  151.00    9.57
  -3  -5   6  135.42    6.80
   3   5  -6  130.98    8.17
   3   5  -6  145.08    7.23
  -3   5   6  137.90    8.91
   3   5  -6  105.08    9.98
   2  -5  -6   65.47    7.68
   2  -5  -6   65.42    7.67
  -2  -5   6   69.79    5.41
   2  -5  -6   68.34    3.66
   2   5  -6   89.09    8.86
  -2   5   6   54.08    6.65
   1  -5  -6  261.93   13.45
   1  -5  -6  284.80   14.28
  -1  -5   6  259.13   12.24
   1   5  -6  277.46   14.06
  -1   5   6  255.41   13.39
   0  -5  -6  158.96   11.10
   0  -5  -6  163.77   10.35
   0  -5   6  175.19    9.99
   0   5   6  172.56   10.39
   0   5  -6  165.13   10.54
  -1  -5  -6   83.92    8.61
   1  -5   6  103.82    8.18
   1   5   6  102.83    5.83
  -1   5  -6  100.80    7.95
   1   5   6   89.23    8.53
  -2  -5  -6   83.87    8.72
   2  -5   6  105.65    9.80
   2   5   6   95.55    6.85
  -2   5  -6   90.01    7.05
   2   5   6  120.11   10.74
   3  -5   6  339.82   17.08
  -3  -5  -6  324.51   17.19
   3   5   6  339.12   15.25
  -3   5  -6  347.60   14.27
   3   5   6  371.94   17.72
  -4  -5  -6   20.85    6.19
   4  -5   6   18.37    5.78
   4   5   6   15.05    5.51
   4   5   6   20.59    5.52
  -5  -5  -6   84.29    9.97
   5  -5   6   81.10   10.37
   5   5   6   80.90    9.69
   5   5   6   77.46    9.93
  -6  -5  -6    7.00    5.89
   6  -5   6   -2.30    5.37
   6   5   6   -0.97    6.01
   6   5   6    6.90    5.64
   7  -5   6   92.81   12.07
   7   5   6   92.06   11.28
   7   5   6  110.85   13.34
   8  -5   6   13.09    8.19
   8  -5   6    7.54    6.61
   8   5   6   -2.33    5.87
   8   5   6   -0.56    7.40
   9  -5   6    3.06    7.17
   9  -5   6    3.28    7.87
   9   5   6   -4.85    6.24
   9   5   6   14.91    8.26
  10  -5   6   -5.02    7.01
  10  -5   6    9.54    9.07
  10   5   6   -5.42    7.18
  10   5   6   -7.39    6.83
  11  -5   6    6.60    9.19
  11   5   6    4.27   10.40
  11   5   6   27.11    9.52
  11  -6  -6   13.37    9.83
  11  -6  -6    8.63    9.18
  11   6  -6   18.76   11.97
  11   6  -6   -7.88    7.90
  10  -6  -6   43.19   10.33
  10  -6  -6   29.09    7.31
  10  -6  -6   38.01   12.36
  10   6  -6   37.39   10.51
  10   6  -6   26.08   11.76
   9  -6  -6   20.16   10.75
   9  -6  -6   28.99    8.55
   9  -6  -6   19.00    6.55
   9   6  -6   38.40   10.93
   9   6  -6   35.89    9.17
   9   6  -6   17.76    7.99
   8  -6  -6    4.47    7.92
   8  -6  -6   12.10    5.97
   8  -6  -6   19.06    6.70
   8   6  -6    6.32    8.60
   8   6  -6    7.26    6.81
   8   6  -6    8.15    6.04
   7  -6  -6  145.97   12.21
   7  -6  -6  139.64   10.95
   7  -6  -6  133.54   14.70
   7   6  -6  124.44   14.04
   7   6  -6  140.44   13.00
   7   6  -6  139.87   14.04
   6  -6  -6  107.24   13.22
   6  -6  -6  103.67   10.06
   6  -6  -6  104.79    9.52
   6   6  -6  100.51   11.76
   6   6  -6  146.88   14.33
   6   6  -6  106.76   10.44
   5  -6  -6    7.97    5.76
   5  -6  -6    5.99    3.60
   5  -6  -6    8.00    4.92
   5   6  -6    1.07    1.67
   5   6  -6    5.66    3.76
   5   6  -6    7.82    5.88
   5   6  -6   -2.89    5.63
   4  -6  -6   35.45    6.42
   4  -6  -6   36.59    7.89
   4  -6  -6   46.69    5.14
   4   6  -6   39.42    5.46
  -4   6   6   38.32    5.94
   4   6  -6   45.48    4.33
   4   6  -6   37.46    7.38
   3  -6  -6  411.47   19.47
   3  -6  -6  382.42   14.56
   3  -6  -6  391.68   18.24
   3  -6  -6  395.37   18.00
  -3  -6   6  379.75   14.77
   3   6  -6  385.73   15.45
  -3   6   6  385.47   17.29
   3   6  -6  414.27   19.47
   3   6  -6  400.34   16.22
   2  -6  -6  144.76   10.21
  -2  -6   6  147.80    8.21
   2  -6  -6  146.55   10.48
  -2   6   6  151.79    9.78
   2   6  -6  148.01    7.82
   2   6  -6  146.66   12.03
   1  -6  -6   10.21    4.66
  -1  -6   6   13.85    4.06
   1  -6  -6   29.14    6.39
  -1   6   6   14.43    4.90
   1   6  -6   13.02    4.96
   0  -6  -6  128.28   11.16
   0  -6   6  105.74    8.46
   0  -6  -6  117.83   10.05
   0   6  -6  128.78   10.18
   0   6   6   96.19    9.32
   1  -6   6  391.01   18.41
  -1  -6  -6  422.22   19.12
   1   6   6  421.65   15.53
   1   6   6  423.41   19.20
  -1   6  -6  402.90   17.60
   2  -6   6  443.58   19.44
  -2  -6  -6  359.88   18.54
   2   6   6  430.08   19.07
   2   6   6  388.70   16.28
  -2   6  -6  421.84   17.05
  -3  -6  -6    9.83    4.80
   3  -6   6   18.42    5.67
   3   6   6    7.21    5.05
   3   6   6    7.66    4.42
  -3   6  -6   11.00    3.57
   4  -6   6  205.22   14.25
  -4  -6  -6  222.02   13.54
   4   6   6  247.09   14.32
  -4   6  -6  226.58   10.25
   4   6   6  229.44   12.96
   5  -6   6  248.00   15.91
  -5  -6  -6  256.83   15.05
   5   6   6  222.17   14.72
   5   6   6  233.29   14.31
   6  -6   6   85.25   11.22
   6   6   6   95.58   11.09
   6   6   6   76.00    9.92
   7  -6   6   23.04    8.05
   7   6   6   19.13    7.27
   7   6   6   14.71    7.29
   8  -6   6  243.88   18.01
   8  -6   6  234.19   18.37
   8   6   6  247.28   18.02
   8   6   6  245.01   17.34
   9  -6   6   25.06    9.32
   9  -6   6   55.91   12.33
   9   6   6   36.70   11.05
   9   6   6   51.74   10.22
  10  -6   6    5.94    9.58
  10  -6   6   17.48    8.54
  10   6   6    8.97    9.39
  10   6   6    9.06    8.14
  11  -7  -6   -9.77    7.64
  11  -7  -6   -3.64    5.81
  11  -7  -6   12.64   11.55
  11   7  -6   -0.89    9.96
  10  -7  -6   -1.15    8.26
  10  -7  -6    9.60    6.38
  10  -7  -6   -2.35    6.48
  10   7  -6    2.33   10.00
  10   7  -6    0.53    6.62
  10   7  -6   -0.31    6.21
   9  -7  -6    8.33    6.56
   9  -7  -6   -5.97    6.59
   9  -7  -6   14.06    9.23
   9   7  -6   -0.63    8.77
   9   7  -6   11.41    7.97
   9   7  -6   -3.12    5.82
   8  -7  -6   80.10   10.48
   8  -7  -6  103.36   15.30
   8  -7  -6  112.74   11.85
   8   7  -6   82.98   13.14
   8   7  -6   95.92   11.90
   8   7  -6  129.88   14.05
   7  -7  -6   38.45    7.66
   7  -7  -6   25.75    8.34
   7  -7  -6   24.21    6.40
   7   7  -6   29.85    9.54
   7   7  -6   21.16    6.38
   7   7  -6   22.48    7.93
   6  -7  -6    6.61    4.29
   6  -7  -6   10.43    5.69
   6  -7  -6    4.33    6.30
   6   7  -6   -1.93    4.31
   6   7  -6    9.76    7.36
   6   7  -6    8.49    6.86
   5  -7  -6   89.80   11.35
   5  -7  -6  112.74    8.30
   5  -7  -6  142.20   11.78
   5   7  -6  116.83    8.71
   5   7  -6  107.67   11.79
   4  -7  -6  604.68   24.51
   4  -7  -6  555.69   25.58
   4  -7  -6  556.17   21.21
   4   7  -6  564.94   25.72
  -4   7   6  556.04   23.54
   4   7  -6  583.80   22.53
   3  -7  -6   32.87    7.19
  -3  -7   6   30.66    4.08
   3  -7  -6   28.06    6.21
   3  -7  -6   40.32    7.52
   3   7  -6   29.84    4.18
   3   7  -6   26.60    6.82
  -3   7   6   27.41    6.04
   2  -7  -6  162.76   11.70
  -2  -7   6  158.35    9.20
   2  -7  -6  198.37   12.16
   2   7  -6  174.96   12.08
   2   7  -6  159.82    7.98
  -2   7   6  171.01   11.03
  -1  -7   6  191.18   10.86
   1  -7  -6  189.31   12.20
   1  -7  -6  195.27   13.00
   1   7  -6  204.34   12.40
  -1   7   6  196.58   12.24
   0  -7   6   33.64    5.85
   0  -7  -6   43.40    6.98
   0  -7  -6   36.12    6.98
   0   7  -6   36.32    6.46
   0   7   6   36.56    6.74
   1  -7   6    4.73    4.33
  -1  -7  -6    4.34    4.73
   1   7   6   -0.03    4.02
  -1   7  -6   -0.09    3.82
  -2  -7  -6  120.00   11.18
   2  -7   6  156.52   12.59
   2   7   6  122.89   11.27
  -2   7  -6  107.02    8.41
   2   7   6  146.86    8.45
  -3  -7  -6   24.97    6.20
   3  -7   6   33.82    7.24
   3   7   6   25.64    6.43
   3   7   6   32.43    5.81
  -3   7  -6   20.77    4.52
  -4  -7  -6    2.57    5.04
   4  -7   6    7.17    5.73
   4   7   6    6.60    5.66
   4   7   6    2.09    4.85
  -4   7  -6    9.35    3.32
  -5  -7  -6    3.23    5.65
   5  -7   6    5.44    5.52
   5   7   6   -1.38    5.27
   5   7   6   -4.04    5.16
   6  -7   6   65.57   10.26
   6   7   6   81.68   10.80
   6   7   6   83.79   10.68
   7  -7   6  312.47   19.79
   7   7   6  310.63   19.32
   7   7   6  299.76   18.38
   8  -7   6   -0.93    7.38
   8   7   6   -0.17    7.57
   8   7   6    2.76    6.48
   9  -7   6    4.41    8.91
   9  -7   6   -1.19    6.94
   9   7   6  -10.46    6.72
   9   7   6   -8.39    7.83
  10  -7   6   50.30   12.07
  10  -7   6   71.37   14.11
  10   7   6   55.51   11.62
  10   7   6   48.12   12.23
  10  -8  -6    6.29   10.61
  10  -8  -6    4.40    7.93
  10  -8  -6   11.04    7.13
  10   8  -6   12.29   10.92
  10   8  -6   15.62    7.74
  10   8  -6    7.75    8.21
   9  -8  -6   14.07    7.51
   9  -8  -6   -2.59    8.99
   9  -8  -6    4.44    6.71
   9   8  -6    8.81    8.06
   9   8  -6   11.46   10.52
   9   8  -6   13.21    7.26
   8  -8  -6   19.92    9.08
   8  -8  -6   15.17    6.67
   8  -8  -6   11.39    7.29
   8   8  -6   11.48    6.06
   8   8  -6   14.14    8.00
   8   8  -6   26.59   10.51
   7  -8  -6   37.37    7.38
   7  -8  -6   28.49    9.15
   7  -8  -6   44.56    8.84
   7   8  -6   51.37   11.31
   7   8  -6   42.17    7.68
   7   8  -6   47.33   10.00
   6  -8  -6   18.27    8.10
   6  -8  -6   30.31    6.31
   6  -8  -6   22.41    6.96
   6   8  -6   32.38    9.01
   6   8  -6   28.95    6.08
   6   8  -6   16.80    8.24
   5  -8  -6    8.15    5.68
   5  -8  -6   -0.91    6.33
   5  -8  -6   -1.42    3.36
   5   8  -6   -1.42    5.63
   5   8  -6    8.47    3.75
   4  -8  -6   64.13    8.79
   4  -8  -6   79.61   10.66
   4   8  -6   71.04    9.29
   4   8  -6   79.41    6.36
  -4   8   6   95.10    9.70
   3  -8  -6   44.43    7.83
   3  -8  -6   39.50    7.34
   3  -8  -6   50.32    8.20
   3   8  -6   53.96    5.03
  -3   8   6   44.74    7.27
   3   8  -6   53.79    8.16
  -2  -8   6    4.23    1.90
  -2  -8   6    3.39    3.68
   2  -8  -6    6.84    4.90
   2  -8  -6   12.77    5.57
   2   8  -6   -4.30    4.18
   2   8  -6    1.20    1.88
  -2   8   6    7.30    4.39
   1  -8  -6    3.33    5.08
  -1  -8   6    9.31    4.24
   1  -8  -6    7.32    5.69
  -1   8   6   15.23    5.57
   1   8  -6    9.13    5.29
   0  -8  -6    2.33    4.32
   0  -8   6    4.31    4.26
   0  -8  -6    6.47    5.47
   0   8   6   12.61    5.68
   0   8  -6    4.52    4.57
   1  -8   6    9.98    4.94
  -1  -8  -6    3.34    5.32
  -1   8  -6   -4.98    3.57
   1   8   6    1.04    4.71
  -2  -8  -6   -4.15    4.98
   2  -8   6    3.03    4.79
   2   8   6   -0.36    3.48
   2   8   6    0.18    4.43
  -2   8  -6   -4.15    3.51
  -3  -8  -6   24.45    7.17
   3  -8   6   19.79    6.08
   3   8   6   24.09    5.58
  -3   8  -6   25.07    4.86
   3   8   6   17.73    5.96
   4  -8   6    1.29    5.80
  -4  -8  -6    1.61    5.52
   4   8   6    4.71    5.04
  -4   8  -6    9.96    3.62
   4   8   6    8.59    5.53
   5  -8   6    8.37    6.01
  -5  -8  -6    4.45    5.96
   5   8   6    8.60    5.69
   5   8   6    9.65    6.40
   6  -8   6    6.58    6.78
   6   8   6    0.51    5.51
   6   8   6   13.42    7.44
   7  -8   6   43.81    9.88
   7   8   6   34.45    9.35
   7   8   6   52.54    9.36
   8  -8   6   -2.58    6.93
   8   8   6    4.97    6.90
   8   8   6   12.52    8.63
   9  -8   6   11.83    9.07
   9  -8   6   35.67   10.37
   9   8   6   26.81    9.26
   9   8   6   27.96   10.26
  10  -8   6    0.82    8.85
  10  -8   6    1.85    7.55
  10   8   6    7.04    8.10
  10   8   6   -2.83    8.78
  10  -9  -6    1.18    7.71
  10  -9  -6   -7.53    9.48
  10  -9  -6    8.44    8.18
  10   9  -6    9.83    8.50
  10   9  -6   -3.34   10.15
   9  -9  -6   30.42    9.29
   9  -9  -6   29.25    8.42
   9  -9  -6   34.03   12.00
   9   9  -6   15.02    8.68
   9   9  -6   32.43   12.30
   8  -9  -6   51.12   12.42
   8  -9  -6   80.02   10.62
   8  -9  -6   73.42   11.07
   8   9  -6   50.60   10.95
   8   9  -6   87.90   14.46
   7  -9  -6   32.70    8.23
   7  -9  -6   25.45    6.43
   7  -9  -6   35.64    9.34
   7   9  -6   10.48    7.91
   7   9  -6   27.24    9.99
   6  -9  -6    3.72    7.06
   6  -9  -6   -2.89    5.43
   6  -9  -6    2.88    4.21
   6   9  -6   -5.20    6.12
   6   9  -6    6.10    4.13
   5  -9  -6  140.73   14.10
   5  -9  -6  130.53    9.11
   5  -9  -6  154.33   13.24
   5   9  -6  176.28   15.85
   4  -9  -6  214.78   14.46
   4  -9  -6  228.77   15.03
   4   9  -6  236.53   11.21
  -4   9   6  246.29   14.34
   4   9  -6  231.45   15.80
   3  -9  -6   76.30    9.29
   3  -9  -6   93.14   10.18
   3  -9  -6   77.03    9.55
  -3   9   6  103.69   10.89
   3   9  -6   74.75    5.16
   3   9  -6   84.95   10.70
   2  -9  -6  227.51   14.64
  -2  -9   6  223.31    9.03
  -2  -9   6  212.63   11.78
   2  -9  -6  241.21   14.92
  -2   9   6  206.48   13.77
   2   9  -6  232.41   14.69
   2   9  -6  231.62    9.37
  -1  -9   6  610.22   24.26
   1  -9  -6  616.21   26.36
   1  -9  -6  606.95   25.84
   1   9  -6  579.84   20.24
  -1   9   6  601.06   25.77
   1   9  -6  585.15   25.50
   0  -9   6  236.68   13.35
   0  -9  -6  250.22   15.35
   0  -9  -6  250.57   14.73
   0   9  -6  204.45   13.14
   0   9   6  227.49   14.54
  -1  -9  -6    7.30    6.16
   1  -9   6    2.44    4.36
   1   9   6    2.55    5.13
  -1   9  -6    2.84    4.29
   2  -9   6  196.96   12.90
  -2   9  -6  191.25   11.51
   2   9   6  197.31   13.92
   3  -9   6  325.86   17.90
  -3  -9  -6  309.76   17.66
   3   9   6  287.54   17.29
   3   9   6  309.09   15.54
  -3   9  -6  306.98   14.59
   4  -9   6   64.40   10.16
  -4  -9  -6   70.64    9.45
   4   9   6   80.61    9.76
   4   9   6   75.46   10.06
   5  -9   6   19.05    7.62
  -5  -9  -6   15.11    7.14
   5   9   6   26.95    7.79
   5   9   6   18.46    7.08
   6  -9   6  149.07   15.32
   6   9   6  182.85   14.53
   6   9   6  211.96   15.54
   7  -9   6   69.46   12.10
   7   9   6   60.98   10.66
   7   9   6   61.12   11.08
   8  -9   6    7.06    7.89
   8   9   6   10.02    7.87
   8   9   6   14.00    9.43
   9  -9   6   22.68   10.32
   9   9   6   29.26   11.05
   9   9   6   16.74    9.00
  10  -9   6   90.32   14.39
  10  -9   6   99.00   16.10
  10   9   6   60.09   13.77
  10   9   6   86.96   13.51
  10 -10  -6   23.39   11.92
  10 -10  -6   -5.12    7.93
  10  10  -6    1.84    8.71
  10  10  -6    4.57   10.99
   9 -10  -6   21.25    8.81
   9 -10  -6   12.81    9.41
   9 -10  -6   24.38    9.14
   9  10  -6   22.67   11.58
   9  10  -6   29.76    9.97
   8 -10  -6   -5.38    8.67
   8 -10  -6  -11.34    5.05
   8 -10  -6    3.94    7.38
   8  10  -6   -2.51    8.66
   8  10  -6    8.35    8.58
   7 -10  -6   48.02    8.15
   7 -10  -6   38.46   10.66
   7 -10  -6   51.42    9.80
   7  10  -6   28.06    9.54
   6 -10  -6   47.72    7.34
   6 -10  -6   64.47   11.49
   6 -10  -6   42.93    9.15
   6  10  -6   47.45   10.12
   5 -10  -6    2.61    6.35
   5 -10  -6    7.29    6.55
   5  10  -6    2.81    6.37
   4 -10  -6   30.73    8.05
   4 -10  -6   24.10    7.05
  -4  10   6   22.67    6.62
   4  10  -6   16.32    6.61
   3 -10  -6  105.11   11.75
   3 -10  -6   95.48   10.59
   3 -10  -6  102.11   11.45
  -3  10   6  103.49   10.82
   3  10  -6  100.52   11.48
   2 -10  -6  112.63   11.71
  -2 -10   6  149.53   10.08
   2 -10  -6  120.08   11.81
   2  10  -6  164.87   13.98
  -2  10   6  165.75   13.96
   1 -10  -6   33.70    7.47
   1 -10  -6   16.80    6.65
  -1 -10   6   32.78    6.22
   1  10  -6   35.19    7.43
  -1  10   6   26.13    7.23
   0 -10  -6  185.60   13.76
   0 -10   6  182.98   12.27
   0 -10  -6  177.15   13.02
   0  10   6  171.50   13.17
   0  10  -6  161.51   11.83
  -1 -10  -6  147.12   12.87
  -1 -10  -6  134.45   12.68
   1 -10   6  110.96   11.03
  -1  10  -6  138.16   10.52
   1  10   6  114.59   11.63
   2 -10   6  216.30   14.26
  -2 -10  -6  209.20   14.55
   2  10   6  196.27   13.82
  -2  10  -6  204.97   12.38
   3 -10   6   17.34    6.60
  -3 -10  -6   11.56    6.87
   3  10   6    4.01    4.88
  -3  10  -6    8.27    4.51
   3  10   6    9.28    6.16
   4 -10   6  127.56   13.20
  -4 -10  -6  155.26   13.75
   4  10   6  171.54   13.92
   4  10   6  113.85   12.14
   5 -10   6   98.45   12.18
   5  10   6  109.74   12.53
   5  10   6  119.07   12.45
   6 -10   6   -3.46    6.70
   6  10   6   -1.82    5.41
   6  10   6   -1.29    6.77
   7 -10   6    5.69    7.80
   7  10   6    2.48    6.87
   7  10   6  -20.61    6.84
   8 -10   6    9.52    8.90
   8  10   6    2.90    7.61
   8  10   6    8.38    9.00
   9 -10   6   48.92   11.61
   9  10   6   23.50   10.76
   9  10   6   49.06   10.52
  10 -10   6    3.35    9.06
  10 -10   6   10.20    8.92
  10  10   6   -1.73    9.40
  10  10   6    0.57    8.28
  10 -11  -6    0.12    8.81
  10 -11  -6    1.78    7.97
  10  11  -6    9.85    9.60
  10  11  -6   -4.26    9.67
   9 -11  -6   22.87    9.33
   9 -11  -6    9.99   10.36
   9  11  -6    0.93    8.78
   8 -11  -6   -0.50    7.22
   8 -11  -6   -9.24    7.96
   8  11  -6   -6.01    8.09
   7 -11  -6    1.97    6.93
   7 -11  -6   -0.06    8.06
   7  11  -6    3.33    7.81
   6 -11  -6    7.12    6.81
   6 -11  -6    2.29    7.82
   6  11  -6    9.66    7.93
   5 -11  -6   12.72    7.75
   5 -11  -6    0.16    6.14
   5  11  -6    7.73    6.84
   4 -11  -6    2.90    6.33
   4 -11  -6   26.29    7.77
  -4  11   6   14.53    6.63
   4  11  -6    4.37    6.12
   3 -11  -6   -2.42    6.16
   3 -11  -6   -3.36    5.61
   3 -11  -6    6.43    6.14
  -3  11   6   10.97    5.77
   3  11  -6    8.41    6.50
   2 -11  -6   -6.34    5.43
   2 -11  -6    2.12    5.66
   2  11  -6    2.92    5.68
  -2  11   6    3.39    5.86
   1 -11  -6   19.66    6.78
   1 -11  -6   15.44    7.03
  -1 -11   6   16.26    5.41
  -1  11   6   22.61    7.48
   1  11  -6   14.31    6.16
   0 -11  -6    2.40    6.07
   0 -11  -6   -1.09    5.46
   0 -11   6    6.64    5.26
   0  11  -6    4.00    5.12
   0  11   6    4.00    6.10
  -1 -11  -6    7.37    6.91
  -1 -11  -6   29.45    7.59
   1 -11   6   15.45    6.42
  -1  11  -6   14.34    5.62
   1  11   6   14.04    7.09
   2 -11   6   54.19    9.25
  -2 -11  -6   63.39   10.41
   2  11   6   66.05    9.96
  -2  11  -6   66.27    8.29
   3 -11   6   11.38    6.61
  -3 -11  -6   16.74    6.76
  -3  11  -6    7.85    4.77
   3  11   6   10.74    6.65
   4 -11   6   33.81    8.58
  -4 -11  -6   35.90    9.22
   4  11   6   33.78    7.77
   4  11   6   44.84    9.23
   5 -11   6    4.17    6.60
   5  11   6    3.57    6.75
   5  11   6    1.72    6.66
   6 -11   6   14.30    8.22
   6  11   6    3.35    6.56
   6  11   6   -1.31    7.36
   7 -11   6    6.93    7.85
   7  11   6    2.75    6.73
   7  11   6    3.31    7.43
   8 -11   6    6.46    8.39
   8  11   6   -2.82    8.25
   8  11   6   -5.72    6.89
   9 -11   6   -1.18    7.98
   9  11   6   -9.38    7.82
   9  11   6    2.63    9.40
   9 -12  -6   30.37   10.18
   9 -12  -6   24.46   11.06
   9  12  -6   13.61   10.03
   8 -12  -6    2.28    7.58
   8 -12  -6    0.05    8.32
   8  12  -6   -1.60    8.96
   7 -12  -6   39.92   11.14
   7 -12  -6   49.13   10.75
   7  12  -6   59.32   11.97
   6 -12  -6  144.39   16.38
   6 -12  -6  170.77   16.02
   6  12  -6  164.35   16.42
   5 -12  -6   11.80    7.78
   5 -12  -6   36.09    8.93
   5  12  -6   28.54    9.26
   4 -12  -6   47.62    9.58
   4 -12  -6   55.06   10.41
   4  12  -6   26.91    8.55
  -4  12   6   53.66    9.58
   3 -12  -6  279.53   18.07
   3 -12  -6  290.06   18.06
   3 -12  -6  352.26   19.93
   3  12  -6  313.54   18.99
  -3  12   6  345.97   19.08
   2 -12  -6  210.23   15.27
   2 -12  -6  154.62   14.73
   2  12  -6  179.01   13.90
  -2  12   6  181.82   16.23
  -1 -12   6   -0.15    4.69
   1 -12  -6    0.41    5.99
   1 -12  -6   11.74    6.88
   1  12  -6    6.35    5.82
  -1  12   6   10.61    6.76
   0 -12  -6  238.09   16.79
   0 -12   6  256.81   15.18
   0  12   6  248.44   16.12
   0  12  -6  223.46   14.76
   1 -12   6  576.45   25.72
  -1 -12  -6  534.31   26.61
  -1 -12  -6  557.83   25.88
   1  12   6  568.97   26.64
  -1  12  -6  539.94   24.42
   2 -12   6   22.96    7.28
  -2 -12  -6   25.91    8.34
  -2  12  -6   23.09    6.23
   2  12   6   24.57    7.78
  -3 -12  -6   14.66    7.16
   3 -12   6   29.15    8.25
   3  12   6   18.80    7.57
  -3  12  -6   27.32    6.45
   4 -12   6  148.55   15.00
  -4 -12  -6  134.93   13.89
   4  12   6  122.31   13.49
   5 -12   6   60.90   10.92
   5  12   6   46.58   10.18
   5  12   6   45.45    9.53
   6 -12   6   -3.88    7.72
   6  12   6   -3.99    7.69
   6  12   6   -8.44    5.47
   7 -12   6    4.22    8.73
   7  12   6   18.67    8.64
   7  12   6    9.80    9.05
   8 -12   6   23.26   10.29
   8  12   6    6.71    9.64
   8  12   6   15.03    8.73
   9 -12   6   12.94    9.37
   9  12   6   10.69   10.48
   9  12   6   14.34    9.95
   9 -13  -6   22.69   10.15
   9 -13  -6   37.01   12.72
   9  13  -6   46.50   12.63
   8 -13  -6   18.83    9.32
   8 -13  -6    5.08    9.68
   8  13  -6    7.18    9.43
   7 -13  -6    6.52    7.74
   7 -13  -6    6.02    8.98
   7  13  -6   -9.65    7.55
   6 -13  -6   77.20   12.55
   6 -13  -6   46.75   10.41
   6  13  -6   67.48   11.67
   5 -13  -6  199.97   15.78
   5 -13  -6  194.60   17.47
   5  13  -6  192.00   18.22
   4 -13  -6  138.48   14.52
   4 -13  -6  121.23   14.17
   4  13  -6  146.75   15.62
  -4  13   6  152.13   15.47
   3 -13  -6   54.50    9.61
   3 -13  -6   64.03   10.88
   3 -13  -6   49.27    9.71
  -3  13   6   48.37    9.56
   3  13  -6   48.65    9.66
   2 -13  -6   66.65   11.06
   2 -13  -6   67.22   11.09
  -2  13   6   82.30   11.92
   2  13  -6   50.42    8.79
   1 -13  -6   79.95   11.81
   1 -13  -6   92.95   11.84
  -1  13   6   66.18   10.25
   1  13  -6   81.85   11.06
   0 -13  -6    1.86    6.34
   0 -13   6    3.42    5.39
   0 -13  -6    1.86    6.26
   0  13   6    7.19    6.72
   0  13  -6    3.37    5.60
   1 -13   6   36.19    8.30
  -1 -13  -6   27.23    8.08
  -1 -13  -6   29.96    7.90
   1  13   6   21.91    8.28
  -1  13  -6   36.95    7.70
   2 -13   6   51.48    9.62
  -2 -13  -6   38.69    8.53
  -2 -13  -6   48.69    9.77
   2  13   6   17.03    7.50
  -2  13  -6   42.95    7.95
  -3 -13  -6   56.65   10.66
   3 -13   6   49.76   10.25
  -3  13  -6   55.22    8.27
   3  13   6   42.75    9.72
   4 -13   6   -1.46    5.81
   4  13   6    2.88    6.87
   5 -13   6    2.85    6.88
   5  13   6    7.58    7.66
   6 -13   6   35.07   10.43
   6  13   6   26.97    9.62
   6  13   6   13.89    7.93
   7 -13   6   40.39   10.69
   7  13   6   48.08   11.18
   7  13   6   53.65   11.99
   8 -13   6    4.37    8.89
   8  13   6    4.47    8.30
   8  13   6   -2.40    8.70
   9 -13   6   -2.54    8.82
   9  13   6    3.84    8.56
   9  13   6   -1.89    9.62
   9 -14  -6   12.34    9.89
   9 -14  -6    3.03   10.43
   9  14  -6   -0.36   10.33
   8 -14  -6   10.45   10.51
   8 -14  -6    5.93    9.11
   8  14  -6   11.51    9.68
   7 -14  -6    7.81    8.79
   7 -14  -6   -8.47    7.11
   7  14  -6   -9.97    7.62
   6 -14  -6   14.91    8.91
   6 -14  -6    8.33    8.29
   6  14  -6    7.60    8.38
   5 -14  -6    4.89    7.84
   5 -14  -6    5.07    7.42
   5  14  -6    1.24    7.19
   4 -14  -6   11.47    7.21
   4 -14  -6   -0.12    7.33
   4  14  -6    1.76    6.52
   3 -14  -6   13.58    8.15
   3 -14  -6   -0.75    6.78
   3 -14  -6    4.20    7.11
   3  14  -6    0.55    6.40
  -3  14   6    6.46    7.03
   2 -14  -6   12.35    7.02
   2 -14  -6   26.24    7.78
   2 -14  -6   28.59    9.35
  -2  14   6   25.91    8.18
   2  14  -6   15.20    7.59
   1 -14  -6    0.87    6.51
   1 -14  -6    3.44    7.27
   1  14  -6   -0.56    5.73
  -1  14   6   11.86    7.41
   0 -14   6   69.39    9.93
   0 -14  -6   68.76   11.93
   0 -14  -6   56.51   10.60
   0  14   6   66.19   10.96
   0  14  -6   63.66    9.89
   1 -14   6   -0.89    5.56
  -1 -14  -6   -1.42    6.30
  -1 -14  -6    9.97    7.99
  -1  14  -6   14.81    6.66
   1  14   6    9.65    7.25
  -2 -14  -6   -2.70    6.09
   2 -14   6   -7.12    5.13
  -2 -14  -6    5.54    7.26
  -2  14  -6    2.05    5.23
   2  14   6   -5.05    5.87
  -3 -14  -6    4.80    6.99
   3 -14   6   20.44    7.53
  -3  14  -6   20.55    6.52
   3  14   6   16.12    7.91
   4 -14   6    5.83    7.39
   4  14   6    4.78    7.78
   5 -14   6   -3.08    6.79
   5  14   6   -2.82    7.05
   6 -14   6    4.19    8.47
   6  14   6   -6.65    6.74
   7 -14   6   10.06    8.96
   7  14   6    2.66    7.97
   7  14   6    8.68    9.16
   8 -14   6   -2.11    8.62
   8  14   6   -9.14    7.57
   8  14   6   -4.69    9.14
   8 -15  -6   22.80   10.77
   8 -15  -6   44.91   12.75
   8  15  -6   51.87   12.63
   7 -15  -6   16.89    9.33
   7 -15  -6   21.26    9.98
   7  15  -6   19.17    9.67
   6 -15  -6    6.45    7.88
   6 -15  -6   22.66   10.19
   6  15  -6   18.79    9.06
   5 -15  -6  227.85   20.40
   5 -15  -6  164.22   17.16
   5  15  -6  226.03   21.29
   4 -15  -6  101.46   14.14
   4 -15  -6  117.01   14.32
   4  15  -6  121.09   14.51
   3 -15  -6   -0.97    6.48
   3 -15  -6   -1.66    6.58
   3 -15  -6    4.80    7.56
  -3  15   6   -0.51    6.09
   3  15  -6   -3.78    6.31
   2 -15  -6   26.05    8.07
   2 -15  -6   15.97    8.49
   2 -15  -6   11.50    7.47
   2  15  -6   16.84    7.88
  -2  15   6   10.07    7.34
   1 -15  -6   97.02   13.29
   1 -15  -6   61.41   10.79
   1  15  -6   75.65   10.68
  -1  15   6  113.58   14.74
   0 -15  -6   35.22   10.20
   0 -15  -6   46.26   10.32
   0  15   6   35.55    9.29
   0  15  -6   69.36   10.32
   1 -15   6    6.09    6.71
  -1 -15  -6   -5.59    6.32
  -1 -15  -6   24.87    8.41
   1  15   6    5.80    7.60
  -1  15  -6   16.73    6.93
  -2 -15  -6   18.45    8.19
  -2 -15  -6   10.54    8.35
   2 -15   6    8.74    6.69
  -2  15  -6   -2.67    5.53
   2  15   6    3.71    7.47
   3 -15   6   55.22   10.97
  -3 -15  -6   33.68    9.24
   3  15   6   35.77    9.09
  -3  15  -6   49.16    8.33
   4 -15   6   22.59    8.62
   4  15   6   56.93   11.41
   5 -15   6   -6.26    7.59
   5  15   6   -3.45    7.21
   6 -15   6   51.99   12.18
   6  15   6   53.71   12.19
   7 -15   6   59.30   13.97
   7  15   6   52.81   12.83
   8 -15   6   20.16   11.22
   8  15   6    7.70    9.64
   8  15   6    1.12    9.47
   8 -16  -6   19.13   10.22
   8 -16  -6    4.21   10.63
   8  16  -6   20.66   11.08
   7 -16  -6   75.36   13.38
   7 -16  -6   79.20   14.10
   7  16  -6   52.49   12.10
   6 -16  -6   24.69   10.31
   6 -16  -6   12.44    9.27
   6  16  -6   25.69    9.81
   5 -16  -6   10.73    8.83
   5 -16  -6    7.09    8.61
   5  16  -6    1.01    7.43
   4 -16  -6   39.68   10.36
   4 -16  -6   48.67   11.39
   4  16  -6   34.52    9.09
   3 -16  -6   67.64   11.39
   3 -16  -6   53.83   11.31
   3 -16  -6   70.73   13.01
  -3  16   6   41.58    9.99
   3  16  -6   39.98    9.65
   2 -16  -6   80.14   12.80
   2 -16  -6  129.62   13.42
   2 -16  -6   82.71   13.45
  -2  16   6   90.36   14.06
   2  16  -6   76.70   12.26
   1 -16  -6    3.11    6.87
   1 -16  -6    5.53    8.43
  -1  16   6   -1.72    7.96
   1  16  -6    5.45    6.99
   0 -16  -6  138.05   16.21
   0 -16  -6  124.42   15.04
   0  16   6  134.30   16.37
  -1 -16  -6  261.29   19.68
   1 -16   6  261.65   18.42
  -1 -16  -6  253.21   18.70
  -1  16  -6  239.15   17.28
   1  16   6  246.15   19.24
  -2 -16  -6   -3.94    6.68
   2 -16   6   -2.72    6.60
  -2 -16  -6   -0.33    7.06
  -2  16  -6    6.25    6.25
   2  16   6   11.94    7.47
  -3 -16  -6    9.91    7.91
   3 -16   6    8.42    7.84
  -3  16  -6    9.83    6.58
   3  16   6    6.30    7.47
   4 -16   6   27.43    9.70
   4  16   6   33.50    9.85
   5 -16   6  133.63   17.09
   5  16   6  113.48   15.03
   6 -16   6    3.12    9.02
   6  16   6   25.26    9.44
   7 -16   6   13.25   10.47
   7  16   6   -4.98    8.00
   7 -17  -6    5.40   10.24
   7 -17  -6    0.03    8.50
   7  17  -6   -2.70    8.61
   6 -17  -6   -0.55    8.33
   6 -17  -6    1.27    8.72
   6  17  -6   23.04    9.78
   5 -17  -6    6.33    8.18
   5 -17  -6    4.09    8.51
   5  17  -6    5.94    7.91
   4 -17  -6   -0.94    7.57
   4 -17  -6    5.65    8.64
   4  17  -6    3.94    7.89
   3 -17  -6    1.38    7.55
   3 -17  -6   -5.57    6.52
   3 -17  -6   -4.53    7.76
  -3  17   6    5.07    7.55
   3  17  -6   15.07    8.14
   2 -17  -6   43.15   10.49
   2 -17  -6   35.80   10.81
  -2  17   6   44.89   11.60
   2  17  -6   36.21    9.92
   1 -17  -6   -5.46    7.85
   1 -17  -6    4.77    7.34
  -1  17   6   -1.17    8.06
   1  17  -6   -3.81    6.48
   0 -17  -6   -5.32    6.82
   0 -17  -6    4.48    8.05
   0  17   6    1.40    7.87
  -1 -17  -6   25.56    9.24
  -1 -17  -6   13.66    8.48
  -1  17  -6   19.89    8.24
   1  17   6   16.62    8.24
  -2 -17  -6   -6.72    6.91
  -2 -17  -6   10.21    8.63
   2 -17   6   -0.68    7.37
  -2  17  -6   -9.62    5.58
   2  17   6   -3.68    6.88
  -3 -17  -6   20.53    9.12
   3 -17   6    6.86    7.96
   3  17   6    8.07    7.77
   4 -17   6   -8.80    7.70
   4  17   6    3.79    7.77
   5 -17   6   -9.11    7.94
   5  17   6    3.35    8.31
   6 -17   6   11.38    9.68
   6  17   6   16.15    9.32
   7  17   6   -2.99    8.60
   6 -18  -6   14.31    9.84
   6  18  -6    9.89    9.23
   5 -18  -6   -5.14    8.72
   5  18  -6    6.98    8.32
   4 -18  -6   18.14    9.75
   4  18  -6   -6.51    6.83
   3 -18  -6   99.41   15.67
   3 -18  -6   97.59   15.46
  -3  18   6  107.65   16.12
   3  18  -6   80.51   13.54
   2 -18  -6   76.14   13.73
   2 -18  -6   70.13   12.69
   2  18  -6   81.62   13.01
  -2  18   6   61.43   12.77
   1 -18  -6   16.58    9.12
   1 -18  -6   -7.32    7.88
  -1  18   6    6.96    8.61
   1  18  -6  -12.03    6.01
   0 -18  -6   42.19   10.76
   0 -18  -6   33.78   11.43
   0  18   6    8.47    8.25
  -1 -18  -6   53.67   11.90
  -1 -18  -6   52.16   11.31
  -1  18  -6   70.22   12.04
   1  18   6   84.38   13.97
  -2 -18  -6   92.69   13.45
   2  18   6   71.99   12.56
  -2  18  -6  135.14   14.48
   3 -18   6   -2.97    7.86
  -3 -18  -6    1.14    8.32
   3  18   6   10.21    8.44
  -4 -18  -6   13.85    9.60
   4 -18   6   19.03    9.72
   4  18   6   24.77   10.12
   5 -18   6   42.39   12.25
   5  18   6   41.19   11.19
   6 -18   6   10.86   10.77
   6  18   6   21.14   10.43
   5 -19  -6    6.99    9.66
   5  19  -6   15.55    9.23
   4 -19  -6   17.13   10.74
   4  19  -6   17.47    9.41
   3 -19  -6   -2.19    9.03
   3 -19  -6   11.46    9.55
   3  19  -6   -0.64    8.16
  -3  19   6    7.93    9.64
   2 -19  -6   34.03   11.35
   2 -19  -6   23.87   10.81
  -2  19   6   25.70   10.86
   2  19  -6   39.36   10.54
   1 -19  -6   42.05   11.94
   1 -19  -6   74.36   13.96
   1  19  -6   66.91   12.27
  -1  19   6   47.71   11.85
   0 -19  -6   62.21   13.12
   0 -19  -6   72.86   13.01
   0  19   6   65.80   12.83
  -1 -19  -6    0.25    9.29
  -1 -19  -6   13.20    9.43
  -1  19  -6    1.67    7.69
   1  19   6   -9.68    7.21
  -2 -19  -6   29.13   10.67
   2  19   6   55.71   12.84
  -2  19  -6   58.97   11.00
  -3 -19  -6  139.58   17.33
   3 -19   6  132.50   17.04
   3  19   6   91.11   14.61
  -4 -19  -6    0.10    9.05
   4 -19   6   15.31   10.87
   4  19   6    4.94    8.75
  -5 -19  -6   16.06   10.74
   5 -19   6    2.20    8.55
   5  19   6   16.82   10.55
   4 -20  -6  -18.74    7.99
   4  20  -6    6.68    8.95
   3 -20  -6   -6.58    8.51
   3 -20  -6    3.26    8.49
   3  20  -6    1.82    7.84
   2 -20  -6   -5.15    7.56
   2 -20  -6   -0.49    8.48
   2  20  -6   -3.82    7.63
  -2  20   6   12.51    9.44
   1 -20  -6  -13.75    8.09
   1 -20  -6   -5.27    8.82
   1  20  -6   -8.53    7.07
  -1  20   6   11.82   10.35
   0 -20  -6   -3.46    8.25
   0 -20  -6    2.11    8.24
   0  20  -6   -5.30    7.15
   0  20   6   -1.73    7.65
  -1 -20  -6   16.84    9.76
  -1 -20  -6    7.08    8.44
  -1  20  -6   -3.26    6.92
   1  20   6   -8.13    7.94
  -2 -20  -6  -22.28    7.00
  -2  20  -6    6.72    7.74
   2  20   6    2.15    9.10
  -3 -20  -6    9.38    9.28
   3  20   6    7.95    8.80
   4 -20   6    3.97    9.31
  -4 -20  -6   -3.87    8.35
   4  20   6   -3.49    8.39
   3 -21  -6   -8.56    8.58
   3 -21  -6   12.53   11.02
   3  21  -6   11.60    9.56
   2 -21  -6   -9.67    8.55
   2 -21  -6    7.30   10.63
   2  21  -6    2.38    8.29
  -2  21   6  -16.61    7.29
   1 -21  -6   53.81   13.11
   1 -21  -6   49.93   13.44
  -1  21   6   75.18   15.01
   1  21  -6   42.87   11.98
   0 -21  -6   29.82   11.15
   0 -21  -6   23.22   10.89
   0  21  -6   38.48   10.94
   0  21   6   20.67    9.76
  -1 -21  -6    4.16    9.66
   1  21   6    1.73    9.57
  -1  21  -6    8.38    8.24
  -2 -21  -6   -5.82    9.23
  -2  21  -6    6.18    8.61
   2  21   6    8.49   10.14
  11   0  -7   -6.81    9.95
  11   0  -7  -10.01    7.90
  10   0  -7  -14.50    8.45
  10   0  -7   -6.56    7.10
   9   0  -7    2.50    7.61
   9   0  -7   -9.92    7.56
   8   0  -7   -8.55    7.06
   8   0  -7    1.04    5.59
   8   0  -7   -7.12    5.55
   7   0  -7    4.79    6.64
   7   0  -7   -0.69    5.03
   7   0  -7    2.36    5.66
   6   0  -7    6.18    5.67
   6   0  -7    6.77    6.03
   6   0  -7    0.67    4.50
   6   0  -7   -0.81    1.99
   5   0  -7    6.11    4.12
   5   0  -7    1.87    2.26
   5   0  -7   -0.26    5.30
   5   0  -7    4.23    2.06
   5   0  -7   -1.23    4.48
   4   0  -7   -1.03    3.29
   4   0  -7    0.80    2.09
   4   0  -7   -3.10    4.59
   4   0  -7   -0.90    4.52
   4   0  -7    3.13    2.64
  -3   0   7   -2.67    2.35
   3   0  -7    4.44    4.62
   3   0  -7    1.19    2.27
   3   0  -7    0.63    2.68
   3   0  -7   -3.03    2.88
   2   0  -7    2.94    3.32
   2   0  -7    5.07    4.67
  -2   0   7    1.36    2.87
   1   0  -7    2.69    3.81
   1   0  -7   -2.03    2.32
   1   0  -7    4.03    4.56
  -1   0   7   -1.44    3.00
   0   0   7    3.70    3.68
   0   0  -7    3.03    4.32
   1   0   7    1.84    4.08
  -1   0  -7   -1.12    4.06
   2   0   7    1.70    4.27
  -2   0  -7    0.84    5.01
  -3   0  -7    0.97    4.49
   3   0   7   -0.51    4.12
  -4   0  -7   -4.83    4.58
   4   0   7   -9.03    3.93
   4   0   7   -0.67    3.77
   5   0   7   -2.86    4.54
   5   0   7    0.22    5.14
  -5   0  -7   -5.10    5.67
   6   0   7    1.27    5.76
  -6   0  -7    8.45    6.83
   6   0   7    2.06    5.64
   7   0   7   -5.28    5.97
   7   0   7   -0.11    6.01
   8   0   7   -5.53    6.32
   8   0   7    6.52    7.37
   9   0   7   -3.44    6.92
   9   0   7    6.56    8.37
  10   0   7    2.15    8.96
  10   0   7  -13.88    6.25
  11   0   7   -9.70    7.39
  11   0   7  -10.90    8.92
  11  -1  -7   18.14   10.48
  11  -1  -7   31.55   10.65
  11   1  -7   22.64   10.56
  11   1  -7   21.42   11.84
  10  -1  -7   39.63   12.07
  10  -1  -7   57.51   12.14
  10   1  -7   41.00   11.97
  10   1  -7   29.81   11.31
   9  -1  -7   14.82    8.71
   9  -1  -7   18.35    8.48
   9   1  -7   18.82    8.60
   9   1  -7   32.62    8.28
   9   1  -7   13.04    8.82
   8  -1  -7   24.42    3.18
   8  -1  -7   36.97    8.44
   8  -1  -7   13.55    8.01
   8   1  -7   27.82    8.37
   8   1  -7   22.49    8.84
   8   1  -7   22.36    7.59
   7  -1  -7  104.26   11.16
   7  -1  -7   90.59   12.10
   7  -1  -7  107.22    6.23
   7   1  -7  103.27   12.57
   7   1  -7  123.76   12.38
   7   1  -7   98.72   11.28
   6  -1  -7  112.77   10.28
   6  -1  -7  120.75    6.76
   6  -1  -7  115.12   12.57
   6   1  -7  106.09   12.07
   6   1  -7  106.03   11.74
   6   1  -7  125.32   11.41
   5  -1  -7  151.21   13.63
   5  -1  -7  150.69    7.91
   5  -1  -7  151.64   13.09
   5  -1  -7  130.82    9.21
   5  -1  -7  147.55    7.41
   5   1  -7  145.99    6.55
   5   1  -7  132.55   12.40
   5   1  -7  144.60    6.37
   5   1  -7  126.98   12.06
   5   1  -7  121.73    9.82
   4  -1  -7  149.52    8.68
   4  -1  -7  150.61    8.15
   4  -1  -7  135.81   11.97
   4  -1  -7  142.80   13.02
   4  -1  -7  154.57    7.71
   4   1  -7  131.30    7.08
   4   1  -7  144.89    6.95
   4   1  -7  114.86   11.05
   4   1  -7  140.26   10.91
   4   1  -7  155.26    9.64
   3  -1  -7  614.52   22.32
   3  -1  -7  610.03   21.62
  -3  -1   7  604.58   21.25
   3  -1  -7  605.48   22.45
   3   1  -7  611.05   25.05
   3   1  -7  596.42   21.71
   3   1  -7  593.96   21.91
  -3   1   7  593.23   21.80
  -2  -1   7  332.53   13.56
   2  -1  -7  321.51   13.79
   2  -1  -7  335.20   14.63
   2   1  -7  326.17   14.09
  -2   1   7  328.43   13.91
   2   1  -7  313.72   16.19
  -1  -1   7   88.07    6.89
   1  -1  -7  100.59    8.47
   1  -1  -7   84.62    6.69
  -1   1   7   95.26    7.77
   1   1  -7   86.28    8.24
   1   1  -7   79.01    7.54
   1   1  -7   86.19    5.36
   0  -1  -7   14.43    5.01
   0  -1   7   12.73    4.38
   0   1   7   22.80    4.61
   0   1  -7   22.11    5.28
   1  -1   7  956.49   35.47
  -1  -1  -7  995.00   36.17
  -2  -1  -7  341.01   16.65
   2  -1   7  320.99   16.11
   2   1   7  310.87   15.99
  -3  -1  -7   26.00    6.26
   3  -1   7   33.18    7.10
   3   1   7   30.26    6.81
   3   1   7   34.57    5.48
   4  -1   7  146.32   12.91
  -4  -1  -7  159.76   13.07
   4   1   7  133.54   11.91
   4   1   7  126.12    9.53
  -5  -1  -7  438.58   21.80
   5  -1   7  494.25   21.34
   5  -1   7  467.51   22.40
   5   1   7  439.28   21.68
   5   1   7  443.50   20.75
  -6  -1  -7   27.73    7.80
   6  -1   7   17.95    6.62
   6  -1   7   26.22    7.42
  -6   1  -7   13.91    7.02
   6   1   7   43.69    8.28
   6   1   7   28.90    7.90
   7  -1   7  103.71   12.50
   7  -1   7   99.46   12.56
   7   1   7  112.35   13.07
   7   1   7  115.91   12.74
   8  -1   7    8.94    7.38
   8  -1   7    7.00    7.56
   8   1   7    9.01    7.17
   8   1   7    5.99    7.58
   9  -1   7   27.96    9.77
   9  -1   7   46.74   10.39
   9   1   7   38.57   10.00
   9   1   7   26.55   10.24
  10  -1   7   -2.50    7.43
  10  -1   7   23.33   11.17
  10   1   7   -1.52    7.88
  10   1   7   12.95    8.47
  11  -1   7    6.32    8.78
  11  -1   7    9.01   10.16
  11   1   7   11.44    8.82
  11   1   7    8.12   10.26
  11  -2  -7   54.35   14.10
  11  -2  -7   46.49   12.04
  11   2  -7   41.39   12.78
  11   2  -7   42.70   13.15
  10  -2  -7    8.71   10.10
  10  -2  -7    6.19    7.98
  10   2  -7    1.53    9.02
  10   2  -7  -11.01    6.79
   9  -2  -7  192.78   19.67
   9  -2  -7  240.84   16.63
   9   2  -7  222.54   15.99
   9   2  -7  194.26   17.89
   9   2  -7  213.19   19.72
   8  -2  -7   79.32   12.44
   8  -2  -7   96.98   11.10
   8  -2  -7   96.81    6.69
   8   2  -7   85.15   13.00
   8   2  -7  102.38   12.57
   8   2  -7   87.11   11.22
   7  -2  -7   30.28    4.45
   7  -2  -7   30.25    8.46
   7  -2  -7   21.39    6.55
   7   2  -7   50.90    8.83
   7   2  -7   30.01    8.64
   7   2  -7   44.98    9.18
   6  -2  -7   34.11    6.26
   6  -2  -7   41.87    8.46
   6  -2  -7   38.14    5.04
   6   2  -7   44.72    7.88
   6   2  -7   33.02    7.47
   6   2  -7   57.29    9.20
   5  -2  -7  377.77   15.40
   5  -2  -7  371.86   19.89
   5  -2  -7  363.12   16.30
   5   2  -7  367.34   12.95
   5   2  -7  394.17   19.46
   5   2  -7  380.70   17.73
   5   2  -7  375.77   13.10
   5   2  -7  374.20   19.00
   4  -2  -7   93.83   10.18
   4  -2  -7   86.40    6.73
   4  -2  -7   88.73    7.06
   4  -2  -7  104.37    6.85
  -4   2   7   94.69    6.44
   4   2  -7   91.13    9.76
   4   2  -7   96.12    9.82
   4   2  -7   92.30    5.54
   4   2  -7   83.52    5.05
   4   2  -7  102.94    9.34
  -3  -2   7   27.62    3.66
   3  -2  -7   18.89    4.56
   3  -2  -7   32.66    3.85
   3   2  -7   30.17    6.58
   3   2  -7   22.65    5.17
  -3   2   7   38.76    4.80
   3   2  -7   31.08    4.24
   3   2  -7   29.89    3.87
   2  -2  -7   29.56    5.05
  -2  -2   7   22.76    3.84
   2  -2  -7   19.14    4.63
   2   2  -7   36.11    6.80
  -2   2   7   21.91    4.35
   1  -2  -7  642.81   23.68
   1  -2  -7  646.47   25.06
  -1  -2   7  666.71   24.00
  -1   2   7  654.28   24.69
   1   2  -7  612.94   25.58
   1   2  -7  647.84   21.24
   0  -2  -7  271.54   12.28
   0  -2  -7  246.11   13.26
   0  -2   7  276.38   12.89
   0   2   7  256.59   12.83
   0   2   7  259.16    9.12
   0   2  -7  239.81   13.12
  -1  -2  -7  388.44   18.59
   1  -2   7  405.59   18.04
   1   2   7  411.94   14.82
   1   2   7  415.55   18.27
  -1   2  -7  421.84   17.70
  -2  -2  -7  214.61   12.89
   2  -2   7  201.53   12.30
   2   2   7  197.21   11.97
   2   2   7  186.85    9.40
   3  -2   7  481.38   22.22
  -3  -2  -7  508.08   22.48
   3   2   7  518.38   22.53
   3   2   7  498.69   19.81
  -4  -2  -7   49.26    8.24
   4  -2   7   76.88    9.58
   4   2   7   57.16    8.21
   4   2   7   55.11    7.18
  -5  -2  -7    3.63    5.57
   5  -2   7    5.42    5.79
   5   2   7    6.78    5.09
   5   2   7    2.17    5.68
   6  -2   7   34.32    8.01
   6  -2   7   14.47    6.69
  -6  -2  -7   18.09    6.64
   6   2   7   15.96    6.87
   6   2   7    2.97    5.91
   7  -2   7   25.70    8.32
   7  -2   7   24.14    8.37
   7   2   7   42.26    8.91
   7   2   7   54.14    9.66
   8  -2   7    1.28    6.71
   8  -2   7   -4.32    6.76
   8   2   7  -10.81    5.46
   8   2   7    5.07    7.49
   9  -2   7   -4.51    8.01
   9  -2   7   22.44    8.86
   9   2   7   -5.57    6.07
   9   2   7    4.92    8.03
  10  -2   7   27.14   11.07
  10  -2   7   22.17    9.10
  10   2   7   17.78    9.98
  10   2   7   14.23    9.07
  11   2   7   26.88    9.66
  11  -3  -7   -1.38    8.32
  11  -3  -7    3.36   10.07
  11   3  -7  -21.51    7.31
  11   3  -7    8.64   10.02
  10  -3  -7    0.00    6.86
  10  -3  -7    1.09    8.06
  10   3  -7   -4.05    9.16
  10   3  -7    4.17    8.72
   9  -3  -7    4.49    6.45
   9  -3  -7   -2.26    3.30
   9  -3  -7    8.70    9.33
   9   3  -7    7.01    6.50
   9   3  -7   10.07    8.69
   9   3  -7   -4.74    7.38
   8  -3  -7    8.74    4.10
   8  -3  -7   22.40    6.72
   8  -3  -7   13.28    8.97
   8   3  -7   17.60    7.19
   8   3  -7    1.76    7.16
   8   3  -7   10.22    6.69
   7  -3  -7   -5.97    5.64
   7  -3  -7    8.16    3.95
   7  -3  -7    4.99    4.96
   7   3  -7    2.97    6.39
   7   3  -7    2.28    6.54
   7   3  -7    8.87    6.37
   6  -3  -7   22.70    5.37
   6  -3  -7   16.80    7.67
   6  -3  -7   24.94    4.79
   6   3  -7   25.72    7.80
   6   3  -7   30.99    7.02
   6   3  -7   30.23    7.21
   5  -3  -7    6.64    6.00
   5  -3  -7    1.17    3.39
   5  -3  -7   11.03    4.17
   5   3  -7    9.79    5.21
   5   3  -7    7.88    5.43
   5   3  -7   10.64    5.99
   4  -3  -7   10.18    4.09
   4  -3  -7    9.54    5.44
   4  -3  -7   13.64    3.41
  -4   3   7   13.88    3.75
   4   3  -7    3.36    5.10
   4   3  -7   11.84    2.37
   4   3  -7    4.89    4.78
   4   3  -7    5.96    2.56
   4   3  -7    8.28    4.57
   3  -3  -7   20.39    3.17
  -3  -3   7   22.64    3.09
   3  -3  -7    7.71    4.20
  -3   3   7    8.84    3.72
   3   3  -7   24.23    6.32
   3   3  -7   17.19    3.24
   3   3  -7   23.96    5.32
   2  -3  -7   17.24    4.80
  -2  -3   7   16.19    3.47
   2  -3  -7   15.22    4.60
  -2   3   7   22.41    4.74
   2   3  -7   14.11    5.33
   1  -3  -7  139.62    9.75
  -1  -3   7  142.85    8.65
   1  -3  -7  145.55    9.12
   1   3  -7  152.36   10.56
  -1   3   7  149.51    9.35
   0  -3  -7   78.39    7.58
   0  -3   7   99.20    8.53
   0  -3  -7   69.04    8.28
   0   3  -7   99.25    8.93
   0   3   7   81.81    8.06
  -1  -3  -7   34.13    6.33
   1  -3   7   42.17    6.51
  -1   3  -7   28.57    5.36
   1   3   7   48.13    4.18
   1   3   7   41.76    6.71
  -2  -3  -7   53.23    8.43
   2  -3   7   57.54    7.38
   2   3   7   63.18    5.84
  -2   3  -7   54.78    6.24
   2   3   7   44.03    7.30
   3  -3   7   36.33    6.90
  -3  -3  -7   20.26    6.47
   3   3   7   32.32    5.33
   3   3   7   15.83    5.37
   4  -3   7   19.74    5.89
  -4  -3  -7   11.54    5.76
   4   3   7   12.72    6.02
   4   3   7   23.36    5.66
   5  -3   7   35.35    7.41
  -5  -3  -7   60.38    9.08
   5   3   7   29.51    7.55
   5   3   7   29.57    6.89
   6  -3   7    4.31    5.89
  -6  -3  -7   17.90    6.61
   6   3   7   15.43    6.60
   6   3   7    7.42    5.75
   7  -3   7   11.41    7.37
   7  -3   7    5.16    7.14
   7   3   7   16.55    7.23
   7   3   7   11.75    6.89
   8  -3   7   11.69    7.18
   8  -3   7    6.58    8.20
   8   3   7   11.20    7.37
   8   3   7   17.92    8.16
   9  -3   7   -4.27    6.21
   9  -3   7   -7.05    7.11
   9   3   7   -1.82    7.74
   9   3   7   -4.52    6.19
  10  -3   7   -2.06    7.59
  10  -3   7    2.98    9.46
  10   3   7   -4.17    6.77
  10   3   7   12.55   10.06
  11  -4  -7   20.82   12.27
  11  -4  -7    7.41    8.33
  11   4  -7    6.31   10.67
  11   4  -7    5.99    9.71
  10  -4  -7   29.34   10.00
  10  -4  -7   28.83   11.77
  10   4  -7   23.50   10.62
  10   4  -7   25.82   10.27
   9  -4  -7    4.10    6.51
   9  -4  -7   -3.85    8.48
   9  -4  -7   16.88    4.76
   9   4  -7   12.12    9.32
   9   4  -7   -0.41    6.93
   9   4  -7   16.02    8.50
   8  -4  -7   44.49   10.77
   8  -4  -7   73.31    9.91
   8  -4  -7   49.65    6.74
   8   4  -7   35.03    8.38
   8   4  -7   53.27   11.17
   8   4  -7   51.98    9.62
   7  -4  -7   54.07   10.23
   7  -4  -7   51.44    7.96
   7  -4  -7   44.69    6.76
   7   4  -7   27.53    8.30
   7   4  -7   57.59    9.36
   7   4  -7   47.62    9.35
   6  -4  -7   65.81    7.91
   6  -4  -7   70.36   10.90
   6  -4  -7   69.48    7.57
   6   4  -7   58.42    9.56
   6   4  -7   69.66    9.82
   6   4  -7   75.19    9.55
   5  -4  -7    1.92    5.78
   5  -4  -7    0.11    4.14
   5  -4  -7    6.98    3.61
   5   4  -7   12.58    6.21
   5   4  -7   11.25    4.87
   5   4  -7   -4.55    4.78
   4  -4  -7   12.23    4.44
   4  -4  -7   -1.06    4.78
   4  -4  -7   14.79    3.31
   4   4  -7    5.80    2.20
   4   4  -7   12.35    4.50
  -4   4   7    3.74    3.57
   4   4  -7   10.94    5.83
   3  -4  -7    9.73    2.43
  -3  -4   7   10.68    2.62
   3  -4  -7    3.03    4.15
   3   4  -7    7.64    5.35
  -3   4   7    5.18    3.58
   3   4  -7   12.29    4.16
   3   4  -7   12.27    2.89
  -2  -4   7   52.29    5.26
   2  -4  -7   51.64    6.92
   2  -4  -7   44.97    6.64
   2   4  -7   44.50    7.32
  -2   4   7   49.06    6.36
   1  -4  -7  259.62   13.66
  -1  -4   7  246.98   12.00
   1  -4  -7  255.61   12.89
  -1   4   7  254.75   12.99
   0  -4   7  126.65    8.56
   0  -4  -7  130.70    9.11
   0  -4  -7  148.19   10.65
   0   4  -7  115.49    9.84
   0   4   7  141.52    9.67
  -1  -4  -7    2.61    4.40
   1  -4   7   10.97    4.73
   1   4   7    5.34    4.74
   1   4   7    9.59    2.68
  -1   4  -7    4.34    4.05
   2  -4   7    9.65    4.78
  -2  -4  -7   10.00    5.07
  -2   4  -7   12.42    4.22
   2   4   7   12.69    5.14
   2   4   7   13.50    3.73
  -3  -4  -7  232.33   14.28
   3  -4   7  225.56   13.81
   3   4   7  222.49   14.03
   3   4   7  219.18   11.47
  -3   4  -7  224.33   11.25
  -4  -4  -7  146.92   12.92
   4  -4   7  134.56   12.34
   4   4   7  136.65    9.89
   4   4   7  140.18   12.53
   5  -4   7    3.84    5.77
  -5  -4  -7   -0.54    5.32
   5   4   7    9.70    5.42
   5   4   7    2.97    4.68
   6  -4   7    2.05    5.30
  -6  -4  -7   -0.95    5.92
   6   4   7    3.91    5.89
   6   4   7    4.00    5.50
   7  -4   7  388.05   22.03
   7   4   7  424.77   21.99
   7   4   7  392.03   21.53
   8  -4   7   33.49    8.91
   8  -4   7   38.96    9.34
   8   4   7   19.03    8.79
   8   4   7   23.28    8.26
   9  -4   7   -1.70    8.21
   9  -4   7   -1.29    7.37
   9   4   7   -1.12    7.13
   9   4   7    0.09    8.06
  10  -4   7    7.43    8.57
  10  -4   7    9.20    8.87
  10   4   7  -15.71    8.06
  10   4   7    5.15    7.68
  11  -5  -7   22.45   12.64
  11  -5  -7   29.14   10.42
  11   5  -7   52.60   13.68
  11   5  -7   40.98   11.35
  10  -5  -7   27.14    5.98
  10  -5  -7   35.17    9.92
  10  -5  -7   32.06   12.17
  10   5  -7   26.57   11.07
  10   5  -7   11.19    7.57
  10   5  -7   19.36    9.85
   9  -5  -7   38.47    6.74
   9  -5  -7   22.60   10.30
   9  -5  -7   49.87    9.77
   9   5  -7   27.13    9.43
   9   5  -7   23.20   10.01
   9   5  -7   29.51    8.92
   8  -5  -7    2.77    5.30
   8  -5  -7    8.59    4.87
   8  -5  -7   -4.33    6.76
   8   5  -7    0.04    7.87
   8   5  -7    4.31    6.80
   8   5  -7   10.10    6.90
   7  -5  -7  206.14   12.70
   7  -5  -7  167.23   16.72
   7  -5  -7  199.36   12.43
   7   5  -7  194.32   16.97
   7   5  -7  179.83   15.91
   7   5  -7  178.53   13.69
   6  -5  -7  169.99   11.32
   6  -5  -7  171.50   10.70
   6  -5  -7  183.11   16.42
   6   5  -7  200.26   14.56
   6   5  -7  165.88   14.69
   6   5  -7  171.31   12.46
   5  -5  -7   43.54    5.79
   5  -5  -7   35.20    6.20
   5  -5  -7   26.74    7.31
   5   5  -7   37.97    8.43
   5   5  -7   43.71    3.37
   5   5  -7   34.70    7.78
   5   5  -7   39.61    6.68
   4  -5  -7   24.23    3.83
   4  -5  -7   20.52    5.27
   4  -5  -7   13.24    6.04
  -4   5   7   20.84    4.79
   4   5  -7   17.03    4.44
   4   5  -7   18.21    2.90
   4   5  -7   11.96    6.18
  -3  -5   7  363.93   13.80
   3  -5  -7  372.73   17.04
   3  -5  -7  360.59   12.97
   3  -5  -7  342.16   17.04
   3   5  -7  347.12   15.68
   3   5  -7  328.63   17.85
   3   5  -7  363.48   14.33
  -3   5   7  336.38   15.85
  -2  -5   7  427.42   17.01
   2  -5  -7  465.66   19.65
   2  -5  -7  427.64   19.20
   2   5  -7  434.41   20.18
  -2   5   7  413.64   18.65
   1  -5  -7   59.83    7.11
   1  -5  -7   51.59    7.09
  -1  -5   7   63.49    6.50
   1   5  -7   65.95    8.25
  -1   5   7   51.47    7.09
   0  -5  -7   70.30    7.64
   0  -5  -7   70.10    8.23
   0  -5   7   63.17    7.00
   0   5   7   62.89    7.68
   0   5  -7   75.22    8.23
   1  -5   7  230.39   12.78
  -1  -5  -7  223.84   13.39
  -1   5  -7  236.37   12.51
   1   5   7  221.40   13.44
   1   5   7  244.65    9.70
   2  -5   7  318.98   16.37
  -2   5  -7  323.71   14.56
   2   5   7  310.97   13.33
   2   5   7  318.36   16.58
   3  -5   7   71.95    8.68
  -3  -5  -7   71.26    9.15
  -3   5  -7   73.73    6.86
   3   5   7   85.01    7.83
[truncated: 282,735 more chars]
