# Supplementary material
Source: MDPI journal article supplement (https://www.mdpi.com/2624-8549/1/1/9)
Supplement: s1 [file s1 › ESI for Bourne_mixedPBA.docx]

**Solvatochromism and selective sorption of volatile organic solvents in pyridylbenzoate metal-organic frameworks**

Christophe A. Ndamyabera, Savannah C. Zacharias,Clive L. Oliver, Susan A. Bourne

Centre for Supramolecular Chemistry Research, Department of Chemistry, University of Cape Town, Rondebosch 7701, South Africa

E-mail: Susan.Bourne@uct.ac.za

***Supporting Information***

**Contents**

1. Crystal structure data

2. Sorption capacity for VOCs

3. PXRD and thermal studiesfor sorption of VOCs

4. Selective sorption

5. Activation Energy for desorption

1. **Single crystal structure data**

***Table S1:*** *Selected torsion angles.*

| **Compound** | **1** | **2** | **3** |
| --- | --- | --- | --- |
| 34pba:  C3A-C4A-C8A-C12A  O1A-C1A-C2A-C7A | -146.0(3)  161.1(3) | -139.1(4)  -177.1(4) | -145.6(3)  163.0(3) |
| 44pba:  C4B-C5B-C8B-C12B  O1B-C1B-C2B-C7B | 163.8(3)  174.3(3) | 158.0(4)  -179.7(4) | 163.9(3)  173.4(3) |

**
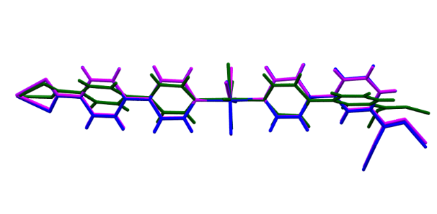
**

***Figure S1:*** *Overlay of core of framework in* ***1*** *(blue),* ***2*** *(green), and* ***3*** *(purple).*

***Table S2:*** *Cell parameter of crystal from sorption of chlorinated solvents.*

| **Compound** | **1d** | | | **1dDCM** | | **1dCHCl3** | | **1dClBenz** | |
| --- | --- | --- | --- | --- | --- | --- | --- | --- | --- |
| **Formula** | C24H16N2O4Co1 | | | C25H18Cl2CoN2O4 | | C25H16.83Cl3CoN2O4 | | C30H21ClCo N2O4 | |
| **Mass (g.mol-1)** | 455.34 | | | 540.24 | | 574.52 | | 567.89 | |
| **Crystal size (mm)** | 0.080 x 0.090 x 0.140 | | | 0.16 x 0.20 x 0.34 | | 0.11 x 0.21 x 0.33 | | 0.10 x 0.13 x 0.20 | |
| **Crystal system** | Monoclinic | | | Monoclinic | | Monoclinic | | Monoclinic | |
| **Space group** | *P*21/*c* | | | *P*21/*c* | | *P*21/*c* | | *P*21/*c* | |
| **a/(Å)** | 10.3931(14) | | | 10.5973(11) | | 10.0048(16) | | 10.2944(16) | |
| **b/(Å)** | 16.027(2) | | | 15.3082(15) | | 16.371(3) | | 16.272(3) | |
| **c/(Å)** | 14.996(2) | | | 14.8848(15) | | 15.036(3) | | 15.248(3) | |
| **β/(°)** | 98.243(2) | | | 99.964(2) | | 97.402(3) | | 95.232(4) | |
| **V/(Å3)** | 2472.2(6) | | | 2378.3(4) | | 2442.3(7) | | 2543.6(7) | |
| **T/(K)** | 100 | | | 100 | | 173 | | 173 | |
| **D (g·cm−3)** | 1.223 | | | 1.509 | | 1.562 | | 1.483 | |
| **μ(Mo−Kα) (mm−1)** | 0.722 | | | 0.981 | | 1.066 | | 0.820 | |
| **F(000)** | | 932 | | 1100 | | 1163 | | 1164 | |
| **range scanned, θ (deg)** | 1.870-27.963 | | 1.923-28.14 | | 1.847-28.31 | | 1.834-28.26 | |
| **no. reflections collected** | | 22935 | | 42669 | | 42591 | | 51772 | |
| **no. unique reflection** | | 5896 | | 5821 | | 6062 | | 6296 | |
| **no. reflections with I ≥ 2σ(I)** | | 3900 | | 4338 | | 4504 | | 4493 | |
| **parameters/restraints** | | 336/0 | | 335/0 | | 326/0 | | 343/0 | |
| **goodness of fit, S** | | 1.079 | | 1.015 | | 1.019 | | 1.038 | |
| **final R indices (I ≥ 2σ(I))** | | 0.1112 | | 0.0696 | | 0.0741 | | 0.0550 | |
| **final wR2 (all data)** | | 0.2084 | | 0.1092 | | 0.1293 | | 0.1386 | |
| **Min,max e- density/(e Å-3)** | | 0.821, -0.786 | | 0.646, -0.699 | | 0.674, -0.946 | | 1.282, -1.117 | |

**2. Sorption capacity for VOCs**

***Table S3a:*** *percentage and ratio of guest-host molecule from* ***1d*** *(mass of* ***1d****:* ***456.35****)*

| **Guest molecules** | **TG %** | **Boiling point (oC)** | **Ratio of framework : guest** | **Solvent molecular volume (A3)** |
| --- | --- | --- | --- | --- |
| **H2O** | 15.43 | 100 | 1:4.6 | 30 |
| **NH3** | 12.9 | -33.34 | 1:4 | 39.4 |
| **MeNH2** | 26.1 | -6 | 1:5 | 73.7 |
| **ProPNH2** | 33.4 | 47.8 | 1:4 | 136 |
| **ButNH2** | 31 | 78 | 1:2.8 | 164 |
| **BzNH2** | 52 | 185 | 1: 4.6 | 181 |
| **PhEtNH2** | 9.7 | 195 | 1: 0.4 | 209 |
| **DCM** | 14.0 | 39.6 | 1: 0.9 | 106 |
| **Chloroform** | 17.1 | 61.2 | 1: 0.8 | 133 |
| **Chlorobenzene** | 13.0 | 132 | 1:0.6 | 168 |

Molecular volume of solvent

***Table S3b:*** *percentage and ratio of guest-host molecule from* ***3d*** *(Mass of* ***3d****:* ***459.79****)*

| **Guest molecules** | **TG %** | **Ratio of framework: guest** | **Solvent molecular volume (A3)** |
| --- | --- | --- | --- |
| **H2O** | 12.9 | 1:3.8 | 30 |
| **NH3** | 12.5 | 1:4.0 | 39.4 |
| **MeNH2** | 18.2 | 1:3.3 | 73.7 |
| **PropNH2** | 18.4 | 1:1.7 | 136 |
| **ButNH2** | 29.2 | 1:2.7 | 164 |
| **BzNH2** | 36 | 1:2.4 | 181 |
| **PhEtNH2** | 8.4 | 1:0.35 | 209 |
| **DCM** | 11.0 | 1:0.7 | 106 |
| **Chloroform** | 13.3 | 1:0.6 | 133 |
| **Chlorobenzene** | 11.0 | 1:0.5 | 168 |

| **Solvent** | **Molecular**  **volume in Å3** | **Desorption temperature range (oC)** | **Maximum loading capacity** | **Experimental loading capacity (based on TG calculation)** | **% loading (expt/max)** |
| --- | --- | --- | --- | --- | --- |
| **H2O** | 30 | 60-134 | 4.6 | 4.6 | 100 |
| **NH3** | 39.4 | 60-150 | 3.5 | 4.0 | 114 |
| **MeNH2** | 73.7 | RT-220 | 1.9 | 5.2 | 273 |
| **PropNH2** | 136 | RT-220 | 1.0 | 3.9 | 390 |
| **ButNH2** | 164 | RT-220 | 0.8 | 2.8 | 350 |
| **BzNH2** | 181 | 65-260 | 0.8 | 4.6 | 575 |
| **PhEtNH2** | 209 | 170-310 | 0.7 | 0.4 | 57 |
| **DCM** | 106 | 60-154 | 1.3 | 0.9 | 69 |
| **Chloroform** | 133 | 118-285 | 1.0 | 0.8 | 80 |
| **Chlorobenzene** | 168 | 87-264 | 0.8 | 0.6 | 75 |

***Table S4a:*** *The solvent accessible volume of* ***1d*** *as calculated by mercury:* ***548.95 Å3****.*

Max Loading capacity (MLc)

***Table S4b:*** *The solvent accessible volume of* ***3d*** *as calculated by mercury:* ***571.42 Å3.***

| **Solvent** | **Molecular**  **volume (Å3)** | **Desorption temperature range (oC)** | **Maximum loading capacity** | **Experimental loading capacity (based on TG calculation)** | **% loading (expt/max)** |
| --- | --- | --- | --- | --- | --- |
| **H2O** | 30 | 73-155 | 4.8 | 3.8 | 79 |
| **NH3** | 39 | 59-127 | 3.6 | 3.9 | 108 |
| **MeNH2** | 73.7 | RT-280 | 1.9 | 3.3 | 174 |
| **PropNH2** | 136 | RT-263 | 1 | 1.8 | 180 |
| **ButNH2** | 164 | 50-290 | 0.9 | 2.6 | 289 |
| **BzNH2** | 181 | 88-290 | 0.8 | 2.4 | 300 |
| **PhEtNH2** | 209 | 77-290 | 0.7 | 0.3 | 43 |
| **DCM** | 106 | 88-220 | 1.4 | 0.7 | 50 |
| **Chloroform** | 133 | 110-232 | 1.1 | 0.6 | 55 |
| **Chlorobenzene** | 168 | 61-252 | 0.8 | 0.5 | 63 |

**3. PXRD and thermal studies for VOC sorption**

***Figure S2:*** *PXRD patterns for sorption (a), of chlorinated VOCs in* ***1d*** *(b),of chlorinated VOCs in* ***3d*** *(c), of amine compounds in* ***1d****, and (d) of amine compounds in* ***3d****.*

***Figure S3:*** *TGA showing sorption capacities (a) of* ***1d*** *for chlorinated VOCs, (b) of* ***3d*** *for chlorinated VOCs, (c) of* ***1d*** *for amine VOCs, and (d)* ***3d*** *for amine VOCs. (b) DSC sorption behavior for chlorinated VOCs in* ***1d*** *(e) and* ***3d*** *(f).*

***Figure S4:*** *TGA curves showing reversible sorption of* ***1d*** *for H2O and NH3.*

**4. Selective sorption**

The following figures display NMR results for the selective sorption of chlorinated VOCs.

***Selectivity from 1d***


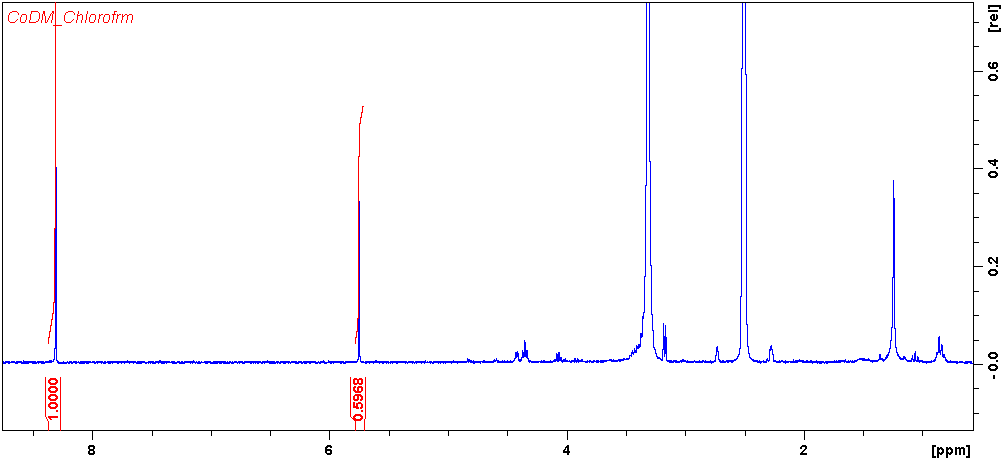


(a)

- *DCM:0.6 dividing by 2 corresponds to 0.3*
- *Chloroform:1 dividing by 3 corresponds to 0.3*

*Molar ratio DCM: Chloroform 1:1*


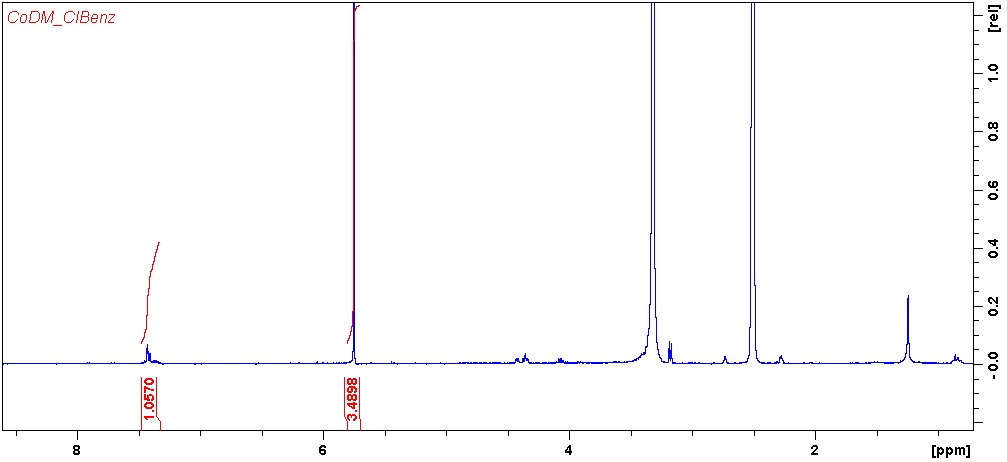


(a)

- *DCM: 3.4 dividing by 2 corresponds to 1.75*
- *ClBenzene: 1 dividing by 5 corresponds to 0.2*

*Molar ratio DCM:ClBenzene 8.3:1*


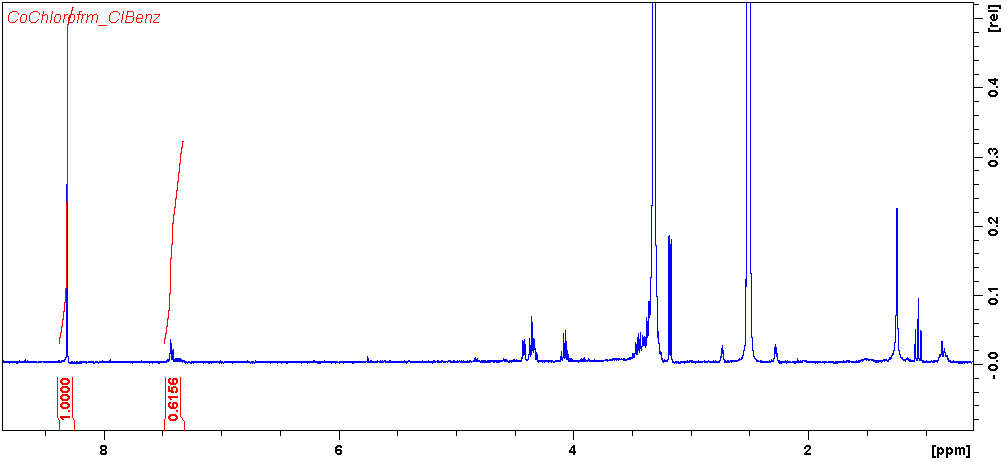


(c)

- *Chloroform:1*
- *ClBenzene:0.6 dividing by 5 corresponds to 0.12*

*Molar ratio Chloroform: ClBenzene 10:1*

***Selectivity from 3d***


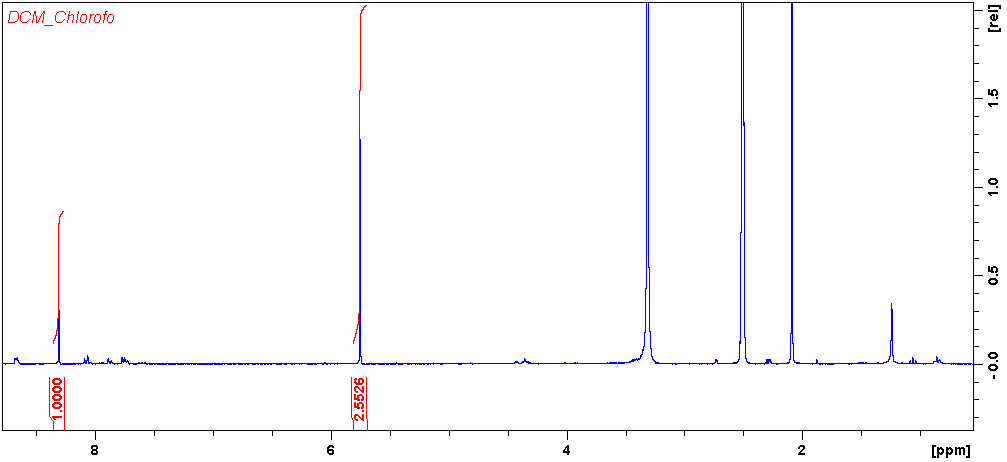


(d)

- *Chloroform: 1*
- *DCM: 2.55, dividing by 2 corresponds to 1.275*

*Molar ratio: DCM_Chloroform: 1.3:1*


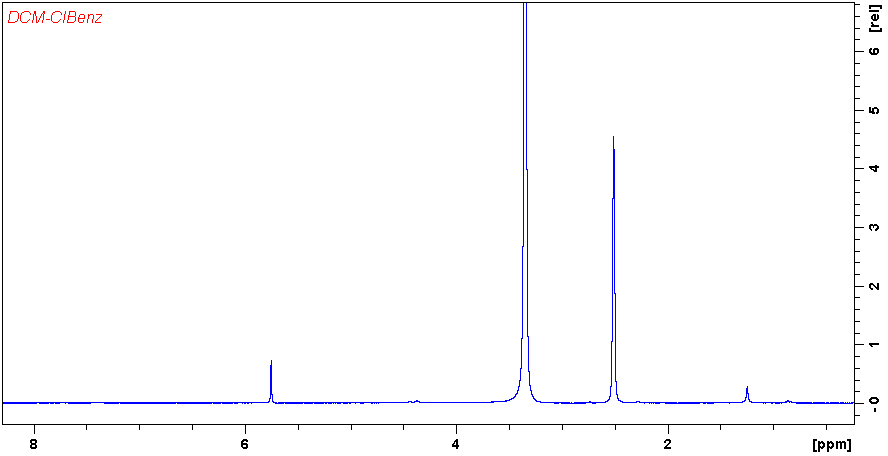


(e)

- *Only DCM was sorbed.*


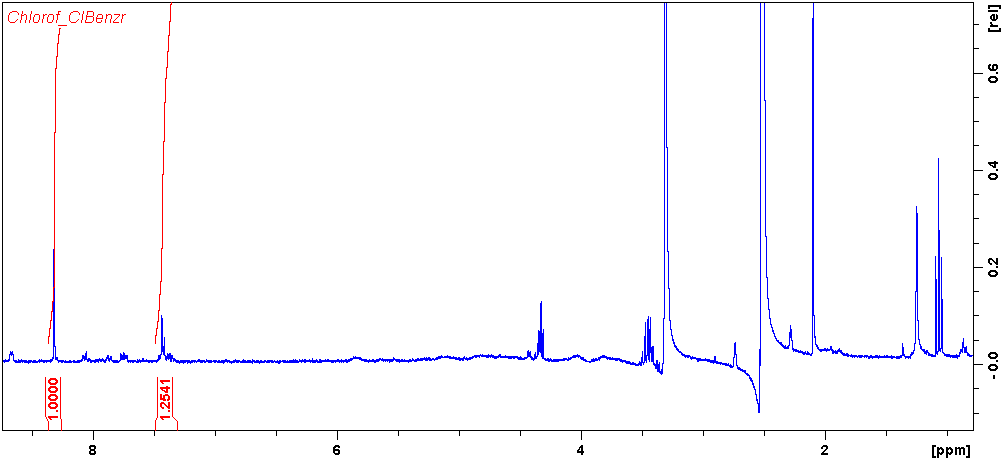


(f)

*Chloroform: 1*

*ClBenzene: 1.25 dividing by 5 corresponds to 0.25*

- *Molar ratio Chloroform: ClBenzene 1:0.3*

***Figure S5:*** *(a, b, c, d, and e) NMR graphs showing relative selectivity of tested chlorinated VOCs in* ***1d*** *and* ***3d****.*

***Figure S6:*** *TGA of the matching desorbed chlorinated VOCs.*

**5. Activation Energy of desorption**

***Figure S7:*** *TGA at different heating rates for (a) for removal of DMF from* ***1****, (b) for removal of DMF from* ***3****, (c) for removal of H2O from* ***1dw****, (d) for removal of NH3 from* ***1dHN3****, (e) removal of H2O from* ***3dw****, and (f) removal of NH3 from* ***3dNH3****.*

***Figure S8:*** *logarithm of heating rates versus reciprocal absolute temperature of (a)* ***1****, (b)* ***3****, (c)* ***1dw****, (d)* ***1dNH3****, (e)* ***3dw****, and (f)* ***3dNH3****.*

***Figure S9:*** *Showing the regeneration of solid 1d from chlorinated and amine VOCs (a) TGA plot, and (b) PXRD. Note that the peaks at 6.6 (2θ) are due to the background made during VTPXRD.*

***Figure S10:*** *of VTPXRD showing little change in phase corresponding to removal of Chlorobenzene from* ***1d****.*

***Figure S11:*** *showing PXRD patterns for 1dBNH2A with 30% weight loss of BNH2 and 1dBNH2B with 52% Weight loss of BNH2.*
